# Supplementary material for: Ammonium Toxicity and Potassium Limitation in Yeast
Source: PLOS journal article supplement (doi:10.1371/journal.pbio.0040351), 2006-10-13
Supplement: S1 (10.1371/journal.pbio.0040351.s001) [file journal.pbio.0040351.s001]

Feature	Chromosome (Tiled)	Begin Coord (Tiled)	End Coord (Tiled)	Region Name (Tiled)	GENE NAME	CHROMOSOME	STRAND	Beginning Coordinate	Ending Coordinate	BIOLOGICAL_PROCESS	MOLECULAR_FUNCTION	DS_GENE_1	DS_GENE_2	Forw Biol Primer Seq	Rev Biol Primer Seq	ORF Name	Sequence Description	Reporter Sequence	Name	SUID	Sequence Type	X-coordinate (whole array, in microns)	Y-coordinate (whole array, in microns)	X Grid Coordinate (within sector)	Y Grid Coordinate (within sector)	Sector	Background Pixel Correlation	Box Bottom	Box Left	Box Right	Box Top	Error Model Used (0|1)	Error of Log Ratio	Feature Is Found (Green) (0|1)	Feature Is Found (Red) (0|1)	Feature Is Green Background Non-uniformity Outlier (0|1)	Feature Is Green Background Population Outlier (0|1)	Feature Is Green Non-uniformity Outlier (0|1)	Feature Is Green Population Outlier (0|1)	Feature Is Red Background Non-uniformity Outlier (0|1)	Feature Is Red Background Population Outlier (0|1)	Feature Is Red Non-uniformity Outlier (0|1)	Feature Is Red Population Outlier (0|1)	Feature Is Used for Normalization (0|1)	Final Processed Green Intensity	Final Processed Red Intensity	GNumBGUsed	GProcessedSigError	Green Background (mean)
1																	BrightCorner||AgilentControlDB		BRIGHTCORNER	1085833	CONTROL	0	0	1	1	1	1			54	43	1	.1600655812	1	1	0	0	0	0	0	0	0	0	0	101262.2	40.0826	1	1719.463	23.64539
2																	(-)3xSLv1||AgilentControlDB;NegativeControl||AgilentControlDB		(-)3XSLV1	1080867	CONTROL	.211666667	0	2	1	1	2			75	44	1	.3925219916	1	1	0	0	0	0	0	0	0	0	0	51.94965	43.28915	1	4.499102	24.55556
3					NHX1	4	W	1367475	1369376	vacuolar acidification*	monovalent inorganic cation transporter activity					YDR456W	YDR456W||ebi.ac.uk:Database:sgd;A_06_P2449||www.chem.agilent.com:Database:agp		A_06_P2449	1086567	OLIGO	.423333334	0	3	1	1	3			96	43	1	.06379284184	1	1	0	0	0	0	0	0	0	0	0	3314.77	962.3688	1	66.58488	24.83451
4					SKI3	16	W	912660	916958	mRNA catabolism*	translation repressor activity					YPR189W	YPR189W||ebi.ac.uk:Database:sgd;A_06_P7237||www.chem.agilent.com:Database:agp		A_06_P7237	1081518	OLIGO	.635000001	0	4	1	1	4			118	44	1	.054027386	1	1	0	0	0	0	0	0	0	0	0	1027.198	776.4877	1	20.8947	24.33829
5					POL5	5	C	51539	48471	rRNA transcription	molecular function unknown*					YEL055C	YEL055C||ebi.ac.uk:Database:sgd;A_06_P2596||www.chem.agilent.com:Database:agp		A_06_P2596	1085713	OLIGO	.846666668	0	5	1	1	5			139	43	1	.04958025648	1	1	0	0	0	0	0	0	0	0	1	2778.693	2803.527	1	46.32085	24.20139
6						15	W	720417	720815							YOR200W	YOR200W||ebi.ac.uk:Database:sgd;A_06_P6562||www.chem.agilent.com:Database:agp		A_06_P6562	1085202	OLIGO	1.058333335	0	6	1	1	6			160	44	1	.201941841	1	1	0	0	0	0	0	0	0	0	1	116.1061	75.97863	1	8.203547	24.61672
7					GIS3	12	C	329239	327731	intracellular signaling cascade	molecular function unknown					YLR094C	YLR094C||ebi.ac.uk:Database:sgd;A_06_P4906||www.chem.agilent.com:Database:agp		A_06_P4906	1085648	OLIGO	1.270000002	0	7	1	1	7			181	43	1	.08082986247	1	1	0	0	0	0	0	0	0	0	1	274.3436	303.054	1	9.061425	24.24476
8																	E1A_r60_n11||AgilentControlDB;(+)E1A_r60_n11||AgilentControlDB		(+)E1A_R60_N11	1545266	CONTROL	1.481666669	0	8	1	1	8			202	43	1	.07078964909	1	1	0	0	0	0	0	0	0	0	0	398.8877	333.3597	1	12.01495	24.63448
9					ALG5	16	C	121167	120163	protein amino acid N-linked glycosylation	dolichyl-phosphate beta-glucosyltransferase activity					YPL227C	YPL227C||ebi.ac.uk:Database:sgd;A_06_P6987||www.chem.agilent.com:Database:agp		A_06_P6987	1082651	OLIGO	1.693333336	0	9	1	1	9			224	43	1	.05128314676	1	1	0	0	0	0	0	0	0	0	0	2242.987	1586.835	1	37.02581	23.96029
10					SEC61	12	C	877177	875735	protein-ER targeting*	protein transporter activity					YLR378C	YLR378C||ebi.ac.uk:Database:sgd;A_06_P5196||www.chem.agilent.com:Database:agp		A_06_P5196	1083497	OLIGO	1.905000003	0	10	1	1	10			245	44	1	.05167649148	1	1	0	0	0	0	0	0	0	0	0	5930.006	3638.046	1	88.07865	24.51408
11					GRX2	4	W	1471007	1471438	response to oxidative stress*	thiol-disulfide exchange intermediate activity*					YDR513W	YDR513W||ebi.ac.uk:Database:sgd;A_06_P2506||www.chem.agilent.com:Database:agp		A_06_P2506	1081545	OLIGO	2.11666667	0	11	1	1	11			266	43	1	.05482040728	1	1	0	0	0	0	0	0	0	0	0	1346.113	795.5518	1	24.92002	24.40071
12						10	W	461743	462339	biological process unknown	RNA binding					YJR014W	YJR014W||ebi.ac.uk:Database:sgd;A_06_P4261||www.chem.agilent.com:Database:agp		A_06_P4261	1086500	OLIGO	2.328333337	0	12	1	1	12			287	43	1	.04973857927	1	1	0	0	0	0	0	0	0	0	1	2597.519	2416.543	1	40.49551	24.41053
13					SSK1	12	C	163892	161754	osmosensory signaling pathway via two-component system*	enzyme activator activity*					YLR006C	YLR006C||ebi.ac.uk:Database:sgd;A_06_P4818||www.chem.agilent.com:Database:agp		A_06_P4818	1085940	OLIGO	2.540000004	0	13	1	1	13			308	43	1	.1020507279	1	1	0	0	0	0	0	0	0	0	1	253.9001	169.5497	1	10.27482	24.3452
14					CDC48	4	C	238664	236157	ubiquitin-dependent protein catabolism*	ATPase activity					YDL126C	YDL126C||ebi.ac.uk:Database:sgd;A_06_P1857||www.chem.agilent.com:Database:agp		A_06_P1857	1086324	OLIGO	2.751666671	0	14	1	1	14			329	44	1	.04925622948	1	1	0	0	0	0	0	0	0	0	1	28277.1	25413.27	1	434.1675	24.63448
15																	(+)E1A_r60_a104||AgilentControlDB;E1A_r60_a104||AgilentControlDB		(+)E1A_R60_A104	1545260	CONTROL	2.963333338	0	15	1	1	15			351	43	1	.3209836537	1	1	0	0	0	1	0	0	0	0	0	98.09276	31.57143	1	7.398929	24.53873
16					QRI1	4	C	276581	275148	UDP-N-acetylglucosamine biosynthesis	UDP-N-acetylglucosamine diphosphorylase activity					YDL103C	YDL103C||ebi.ac.uk:Database:sgd;A_06_P1833||www.chem.agilent.com:Database:agp		A_06_P1833	1083747	OLIGO	3.175000005	0	16	1	1	16			372	44	1	.04955679239	1	1	0	0	0	0	0	0	0	0	1	2850.631	2908.072	1	52.29685	24.71777
17						17	W	65770	66174							Q0182	Q0182||ebi.ac.uk:Database:sgd;A_06_P1019||www.chem.agilent.com:Database:agp		A_06_P1019	1084037	OLIGO	3.386666672	0	17	1	1	17			393	43	1	.07426563913	1	1	0	0	0	0	0	0	0	0	0	494.2774	252.0711	1	13.59132	24.48814
18					SUP45	2	C	532176	530863	cytokinesis*	translation release factor activity, codon specific					YBR143C	YBR143C||ebi.ac.uk:Database:sgd;A_06_P1395||www.chem.agilent.com:Database:agp		A_06_P1395	1086863	OLIGO	3.598333339	0	18	1	1	18			415	44	1	.04931668332	1	1	0	0	0	0	0	0	0	0	1	8045.787	9022.258	1	105.2725	24.52797
19					RPS14A	3	C	178215	177495	protein biosynthesis*	structural constituent of ribosome*					YCR031C	YCR031C||ebi.ac.uk:Database:sgd;A_06_P1656||www.chem.agilent.com:Database:agp		A_06_P1656	1081279	OLIGO	3.810000006	0	19	1	1	19			436	43	1	.04927550967	1	1	0	0	0	0	0	0	0	0	1	6079.291	6534.371	1	79.60873	24.5
20						13	C	608210	607827							YMR172C-A	YMR172C-A||ebi.ac.uk:Database:sgd;A_06_P5607||www.chem.agilent.com:Database:agp		A_06_P5607	1085337	OLIGO	4.021666673	0	20	1	1	20			457	44	1	.3306434655	1	1	0	0	0	0	0	0	0	0	0	85.78471	35.17328	1	7.325857	24.68459
21					ISW1	2	C	711534	708145	chromatin remodeling	ATPase activity					YBR245C	YBR245C||ebi.ac.uk:Database:sgd;A_06_P1499||www.chem.agilent.com:Database:agp		A_06_P1499	1084928	OLIGO	4.23333334	0	21	1	1	21			477	43	1	.05008477821	1	1	0	0	0	0	0	0	0	0	1	3437.451	2705.721	1	48.27052	24.7029
22																	E1A_r60_a97||AgilentControlDB;(+)E1A_r60_a97||AgilentControlDB		(+)E1A_R60_A97	1545264	CONTROL	4.445000007	0	22	1	1	22			499	44	1	.4924328791	1	1	0	0	0	0	0	0	0	0	0	29.69832	47.15473	1	4.491141	24.68421
23					PIN2	15	W	517642	518490	biological process unknown	molecular function unknown					YOR104W	YOR104W||ebi.ac.uk:Database:sgd;A_06_P6466||www.chem.agilent.com:Database:agp		A_06_P6466	1081604	OLIGO	4.656666674	0	23	1	1	23			520	43	1	.05654385928	1	1	0	0	0	0	0	0	0	0	0	603.6497	801.2059	1	15.60667	23.80427
24					HSD1	15	C	899923	899051	biological process unknown	molecular function unknown					YOR311C	YOR311C||ebi.ac.uk:Database:sgd;A_06_P6674||www.chem.agilent.com:Database:agp		A_06_P6674	1082369	OLIGO	4.868333341	0	24	1	1	24			541	44	1	.04964957573	1	1	0	0	0	0	0	0	0	0	1	4019.493	3422.137	1	60.20104	23.59926
25					CDC47	2	W	625767	628304	DNA replication initiation*	chromatin binding*					YBR202W	YBR202W||ebi.ac.uk:Database:sgd;A_06_P1455||www.chem.agilent.com:Database:agp		A_06_P1455	1085427	OLIGO	5.080000008	0	25	1	1	25			562	43	1	.05978820087	1	1	0	0	0	0	0	0	0	0	0	699.2058	476.929	1	15.3454	23.9331
26					MEF1	12	C	273916	271631	translational elongation	translation elongation factor activity					YLR069C	YLR069C||ebi.ac.uk:Database:sgd;A_06_P4881||www.chem.agilent.com:Database:agp		A_06_P4881	1086691	OLIGO	5.291666675	0	26	1	1	26			583	44	1	.05159607871	1	1	0	0	0	0	0	0	0	0	1	1156.183	1199.233	1	19.59347	23.97222
27					ILS1	2	C	84259	81041	protein biosynthesis	isoleucine-tRNA ligase activity					YBL076C	YBL076C||ebi.ac.uk:Database:sgd;A_06_P1208||www.chem.agilent.com:Database:agp		A_06_P1208	1086499	OLIGO	5.503333342	0	27	1	1	27			605	43	1	.04914096038	1	1	0	0	0	0	0	0	0	0	1	23939.97	24013.59	1	301.6632	24.49281
28					PRP11	4	C	376477	375677	spliceosome assembly	RNA binding					YDL043C	YDL043C||ebi.ac.uk:Database:sgd;A_06_P1771||www.chem.agilent.com:Database:agp		A_06_P1771	1083264	OLIGO	5.715000009	0	28	1	1	28			626	44	1	.1077447266	1	1	0	0	0	0	0	0	0	0	1	176.0883	211.3741	1	9.008218	24.67159
29																	E1A_r60_a97||AgilentControlDB;(+)E1A_r60_a97||AgilentControlDB		(+)E1A_R60_A97	1545264	CONTROL	5.926666676	0	29	1	1	29			647	43	1	.5445332212	1	1	0	0	0	0	0	0	0	0	0	33.20178	35.0091	1	6.490865	24.36232
30					PTP1	4	W	42701	43708	protein amino acid dephosphorylation	protein tyrosine phosphatase activity					YDL230W	YDL230W||ebi.ac.uk:Database:sgd;A_06_P1965||www.chem.agilent.com:Database:agp		A_06_P1965	1085305	OLIGO	6.138333343	0	30	1	1	30			668	44	1	.05628532866	1	1	0	0	0	0	0	0	0	0	1	640.0388	721.7762	1	14.45636	24.58608
31					ARP2	4	W	399337	400635	actin filament organization*	structural constituent of cytoskeleton*					YDL029W	YDL029W||ebi.ac.uk:Database:sgd;A_06_P1757||www.chem.agilent.com:Database:agp		A_06_P1757	1083431	OLIGO	6.35000001	0	31	1	1	31			689	43	1	.04965227764	1	1	0	0	0	0	0	0	0	0	1	3533.182	3072.159	1	43.46946	24.56391
32					PRE1	5	W	177834	178430	response to stress*	endopeptidase activity					YER012W	YER012W||ebi.ac.uk:Database:sgd;A_06_P2634||www.chem.agilent.com:Database:agp		A_06_P2634	1080817	OLIGO	6.561666677	0	32	1	1	32			710	44	1	.04963154443	1	1	0	0	0	0	0	0	0	0	1	2761.22	3020.216	1	49.54363	24.52941
33					FPR4	12	W	1030829	1032007	biological process unknown	peptidyl-prolyl cis-trans isomerase activity					YLR449W	YLR449W||ebi.ac.uk:Database:sgd;A_06_P5268||www.chem.agilent.com:Database:agp		A_06_P5268	1084375	OLIGO	6.773333344	0	33	1	1	33			732	43	1	.04940073438	1	1	0	0	0	0	0	0	0	0	1	3767.25	3636.838	1	63.70437	24.73835
34						12	W	1053626	1054540	biological process unknown	molecular function unknown					YLR455W	YLR455W||ebi.ac.uk:Database:sgd;A_06_P5274||www.chem.agilent.com:Database:agp		A_06_P5274	1082335	OLIGO	6.985000011	0	34	1	1	34			753	44	1	.05438868752	1	1	0	0	0	0	0	0	0	0	0	1132.423	765.5167	1	20.2591	24.95956
35					UBI4	12	C	65206	64061	response to stress*	protein tag*					YLL039C	YLL039C||ebi.ac.uk:Database:sgd;A_06_P4784||www.chem.agilent.com:Database:agp		A_06_P4784	1083026	OLIGO	7.196666678	0	35	1	1	35			774	44	1	.04959734451	1	1	0	0	0	0	0	0	0	0	1	21608.94	17499.96	1	231.5106	25.07885
36																	E1A_r60_a135||AgilentControlDB;(+)E1A_r60_a135||AgilentControlDB		(+)E1A_R60_A135	1545258	CONTROL	7.408333345	0	36	1	1	36			795	44	1	.3277579367	1	1	0	0	0	1	0	0	0	0	0	93.91941	31.83854	1	6.606361	25.08127
37					IES4	15	W	689624	689974	biological process unknown	molecular function unknown					YOR189W	YOR189W||ebi.ac.uk:Database:sgd;A_06_P6551||www.chem.agilent.com:Database:agp		A_06_P6551	1081103	OLIGO	7.620000012	0	37	1	1	37			816	43	1	.05763235197	1	1	0	0	0	0	0	0	0	0	0	739.8026	556.2126	1	13.83111	25.12281
38						16	C	678317	677809	biological process unknown	molecular function unknown					YPR063C	YPR063C||ebi.ac.uk:Database:sgd;A_06_P7109||www.chem.agilent.com:Database:agp		A_06_P7109	1085116	OLIGO	7.831666679	0	38	1	1	38			837	44	1	.05121832114	1	1	0	0	0	0	0	0	0	0	0	2299.13	1630.845	1	31.53328	24.85366
39						3	C	40724	39786	biological process unknown	molecular function unknown					YCL049C	YCL049C||ebi.ac.uk:Database:sgd;A_06_P1601||www.chem.agilent.com:Database:agp		A_06_P1601	1083854	OLIGO	8.043333346	0	39	1	1	39			859	43	1	.05141112169	1	1	0	0	0	0	0	0	0	0	0	1568.278	2256.401	1	25.68189	24.59932
40						10	W	466700	467062							YJR018W	YJR018W||ebi.ac.uk:Database:sgd;A_06_P4265||www.chem.agilent.com:Database:agp		A_06_P4265	1084870	OLIGO	8.255000013	0	40	1	1	40			880	44	1	.1399105321	1	1	0	0	0	0	0	0	0	0	0	212.6232	92.24666	1	7.543213	24.68621
41						12	C	645955	645602							YLR255C	YLR255C||ebi.ac.uk:Database:sgd;A_06_P5069||www.chem.agilent.com:Database:agp		A_06_P5069	1081433	OLIGO	8.46666668	0	41	1	1	41			901	43	1	.1031596981	1	1	0	0	0	0	0	0	0	0	1	219.1806	189.7628	1	8.581824	24.74021
42						12	W	94746	95120	biological process unknown	molecular function unknown					YLL025W	YLL025W||ebi.ac.uk:Database:sgd;A_06_P4770||www.chem.agilent.com:Database:agp		A_06_P4770	1083454	OLIGO	8.678333347	0	42	1	1	42			922	44	1	.05072566611	1	1	0	0	0	0	0	0	0	0	0	1924.243	2599.149	1	22.99144	24.93525
43																	E1A_r60_a135||AgilentControlDB;(+)E1A_r60_a135||AgilentControlDB		(+)E1A_R60_A135	1545258	CONTROL	8.890000014	0	43	1	1	43			943	43	1	.3468572434	1	1	0	0	0	0	0	0	0	0	0	80.98135	33.84836	1	7.04798	25.0931
44					THI12	14	W	14832	15854	thiamin biosynthesis	molecular function unknown					YNL332W	YNL332W||ebi.ac.uk:Database:sgd;A_06_P6104||www.chem.agilent.com:Database:agp		A_06_P6104	1081265	OLIGO	9.101666681	0	44	1	1	44			964	44	1	.08130628797	1	1	0	0	0	0	0	0	0	0	0	202.8005	450.1987	1	9.345516	24.85616
45					RSM7	10	C	638890	638147	protein biosynthesis	structural constituent of ribosome					YJR113C	YJR113C||ebi.ac.uk:Database:sgd;A_06_P4356||www.chem.agilent.com:Database:agp		A_06_P4356	1084718	OLIGO	9.313333348	0	45	1	1	45			986	43	1	.04943349777	1	1	0	0	0	0	0	0	0	0	1	3419.982	3540.348	1	50.70301	24.69149
46					LST4	11	C	117991	115505	vesicle-mediated transport*	protein transporter activity					YKL176C	YKL176C||ebi.ac.uk:Database:sgd;A_06_P4589||www.chem.agilent.com:Database:agp		A_06_P4589	1082435	OLIGO	9.525000015	0	46	1	1	46			1006	44	1	.05062376167	1	1	0	0	0	0	0	0	0	0	1	4603.334	3232.864	1	68.87218	24.73333
47					NBP35	7	C	343045	342059	biological process unknown	ATPase activity					YGL091C	YGL091C||ebi.ac.uk:Database:sgd;A_06_P3046||www.chem.agilent.com:Database:agp		A_06_P3046	1084583	OLIGO	9.736666682	0	47	1	1	47			1028	43	1	.05154094786	1	1	0	0	0	0	0	0	0	0	1	1176.256	1202.391	1	24.42449	24.91608
48					TAX4	10	W	278757	280571	cell wall organization and biogenesis*	molecular function unknown					YJL083W	YJL083W||ebi.ac.uk:Database:sgd;A_06_P4105||www.chem.agilent.com:Database:agp		A_06_P4105	1084012	OLIGO	9.948333349	0	48	1	1	48			1049	44	1	.1474844611	1	1	0	0	0	0	0	0	0	0	1	177.0914	98.81975	1	7.056443	24.90036
49						10	C	375690	375031	biological process unknown	molecular function unknown					YJL038C	YJL038C||ebi.ac.uk:Database:sgd;A_06_P4059||www.chem.agilent.com:Database:agp		A_06_P4059	1085907	OLIGO	10.160000016	0	49	1	1	49			1070	44	1	.3277679409	1	1	0	0	0	0	0	0	0	0	0	101.2063	28.66826	1	6.813273	24.89259
50																	E1A_r60_a97||AgilentControlDB;(+)E1A_r60_a97||AgilentControlDB		(+)E1A_R60_A97	1545264	CONTROL	10.371666683	0	50	1	1	50			1092	44	1	.4400743285	1	1	0	0	0	0	0	0	0	0	0	37.67673	47.26281	1	5.748359	25.78246
51					AMN1	2	W	556543	558192	negative regulation of exit from mitosis*	protein binding					YBR158W	YBR158W||ebi.ac.uk:Database:sgd;A_06_P1410||www.chem.agilent.com:Database:agp		A_06_P1410	1086594	OLIGO	10.58333335	0	51	1	1	51			1113	44	1	.05019148456	1	1	0	0	0	0	0	0	0	0	1	5744.673	7840.728	1	78.25681	25.36691
52					SEC22	12	W	680202	680846	ER to Golgi transport*	v-SNARE activity					YLR268W	YLR268W||ebi.ac.uk:Database:sgd;A_06_P5083||www.chem.agilent.com:Database:agp		A_06_P5083	1082087	OLIGO	10.795000017	0	52	1	1	52			1134	44	1	.0510139517	1	1	0	0	0	0	0	0	0	0	0	1668.378	1369.977	1	26.37073	24.86713
53					MAP2	2	C	48625	47360	proteolysis and peptidolysis	methionyl aminopeptidase activity					YBL091C	YBL091C||ebi.ac.uk:Database:sgd;A_06_P1223||www.chem.agilent.com:Database:agp		A_06_P1223	1082430	OLIGO	11.006666684	0	53	1	1	53			1155	43	1	.0492082448	1	1	0	0	0	0	0	0	0	0	1	6954.419	6890.397	1	110.7499	24.80866
54					GAP1	11	W	514705	516513	amino acid transport*	L-proline permease activity*					YKR039W	YKR039W||ebi.ac.uk:Database:sgd;A_06_P4677||www.chem.agilent.com:Database:agp		A_06_P4677	1083972	OLIGO	11.218333351	0	54	1	1	54			1176	44	1	.1259440964	1	1	0	0	0	0	0	0	0	0	0	91500.69	2720.374	1	1423.583	25.19928
55					SMY2	2	C	581367	579145	cytoskeleton organization and biogenesis	molecular function unknown					YBR172C	YBR172C||ebi.ac.uk:Database:sgd;A_06_P1425||www.chem.agilent.com:Database:agp		A_06_P1425	1086026	OLIGO	11.430000018	0	55	1	1	55			1197	44	1	.05176067582	1	1	0	0	0	0	0	0	0	0	0	1319.958	1106.272	1	19.00926	24.53929
56					CMK1	6	C	173869	172529	protein amino acid phosphorylation*	calmodulin-dependent protein kinase I activity					YFR014C	YFR014C||ebi.ac.uk:Database:sgd;A_06_P2909||www.chem.agilent.com:Database:agp		A_06_P2909	1082399	OLIGO	11.641666685	0	56	1	1	56			1218	44	1	.0517684451	1	1	0	0	0	0	0	0	0	0	0	2537.295	1652.281	1	40.06715	24.93357
57																	E1A_r60_a22||AgilentControlDB;(+)E1A_r60_a22||AgilentControlDB		(+)E1A_R60_A22	1545265	CONTROL	11.853333352	0	57	1	1	57			1240	44	1	.1597626685	1	1	0	0	0	0	0	0	0	0	0	240.547	57.17153	1	8.89916	25.20979
58					TOS3	7	C	165097	163415	glucose metabolism	protein kinase activity					YGL179C	YGL179C||ebi.ac.uk:Database:sgd;A_06_P3134||www.chem.agilent.com:Database:agp		A_06_P3134	1082489	OLIGO	12.065000019	0	58	1	1	58			1261	44	1	.06062306285	1	1	0	0	0	0	0	0	0	0	1	557.4827	491.9342	1	11.66496	25.21429
59					RAD53	16	C	264191	261726	DNA repair*	protein threonine/tyrosine kinase activity					YPL153C	YPL153C||ebi.ac.uk:Database:sgd;A_06_P6912||www.chem.agilent.com:Database:agp		A_06_P6912	1082803	OLIGO	12.276666686	0	59	1	1	59			1282	43	1	.05660329986	1	1	0	0	0	0	0	0	0	0	0	845.5863	598.2951	1	12.96639	24.85461
60					ARP7	16	W	639522	640955	chromatin remodeling	general RNA polymerase II transcription factor activity					YPR034W	YPR034W||ebi.ac.uk:Database:sgd;A_06_P7080||www.chem.agilent.com:Database:agp		A_06_P7080	1083717	OLIGO	12.488333353	0	60	1	1	60			1303	44	1	.05128452055	1	1	0	0	0	0	0	0	0	0	0	2667.935	1822.306	1	46.9078	24.50174
61					TMS1	4	C	666765	665344	biological process unknown	molecular function unknown					YDR105C	YDR105C||ebi.ac.uk:Database:sgd;A_06_P2093||www.chem.agilent.com:Database:agp		A_06_P2093	1086624	OLIGO	12.70000002	0	61	1	1	61			1324	44	1	.05102216369	1	1	0	0	0	0	0	0	0	0	0	2558.345	1821.152	1	44.17386	24.55
62					RNA14	13	W	392754	394787	mRNA polyadenylylation*	RNA binding*					YMR061W	YMR061W||ebi.ac.uk:Database:sgd;A_06_P5488||www.chem.agilent.com:Database:agp		A_06_P5488	1081093	OLIGO	12.911666687	0	62	1	1	62			1345	44	1	.05169325062	1	1	0	0	0	0	0	0	0	0	0	1421.972	1142.254	1	26.39583	24.81227
63						1	W	208358	208654							YAR053W	YAR053W||ebi.ac.uk:Database:sgd;A_06_P1118||www.chem.agilent.com:Database:agp		A_06_P1118	1083325	OLIGO	13.123333354	0	63	1	1	63			1366	43	1	.06814316169	1	1	0	0	0	0	0	0	0	0	0	303.1934	703.3724	1	9.082809	24.75704
64																	(+)E1A_r60_a104||AgilentControlDB;E1A_r60_a104||AgilentControlDB		(+)E1A_R60_A104	1545260	CONTROL	13.335000021	0	64	1	1	64			1387	44	1	.3489965238	1	1	0	0	0	1	0	0	0	0	0	87.2737	30.19216	1	7.071007	25.39929
65					SPR28	4	C	905046	903775	cell wall organization and biogenesis*	structural constituent of cytoskeleton					YDR218C	YDR218C||ebi.ac.uk:Database:sgd;A_06_P2207||www.chem.agilent.com:Database:agp		A_06_P2207	1084902	OLIGO	13.546666688	0	65	1	1	65			1409	43	1	.406885403	1	1	0	0	0	0	0	0	0	0	1	56.48627	36.56847	1	6.876764	24.92308
66					GYP6	10	C	359592	358216	intracellular protein transport	GTPase activator activity					YJL044C	YJL044C||ebi.ac.uk:Database:sgd;A_06_P4064||www.chem.agilent.com:Database:agp		A_06_P4064	1085099	OLIGO	13.758333355	0	66	1	1	66			1430	45	1	.05246671333	1	1	0	0	0	0	0	0	0	0	1	1034.576	983.5648	1	21.63583	25.21379
67						15	W	870199	874068	biological process unknown	molecular function unknown					YOR296W	YOR296W||ebi.ac.uk:Database:sgd;A_06_P6657||www.chem.agilent.com:Database:agp		A_06_P6657	1082036	OLIGO	13.970000022	0	67	1	1	67			1451	44	1	.05973619573	1	1	0	0	0	0	0	0	0	0	0	777.8446	474.4866	1	16.00941	24.40351
68					SHE10	7	W	67598	69331	biological process unknown	molecular function unknown					YGL228W	YGL228W||ebi.ac.uk:Database:sgd;A_06_P3184||www.chem.agilent.com:Database:agp		A_06_P3184	1082256	OLIGO	14.181666689	0	68	1	1	68			1472	44	1	.05044021905	1	1	0	0	0	0	0	0	0	0	0	2226.123	1801.629	1	34.29815	24.48123
69						15	W	817289	818332	biological process unknown	molecular function unknown					YOR262W	YOR262W||ebi.ac.uk:Database:sgd;A_06_P6623||www.chem.agilent.com:Database:agp		A_06_P6623	1085490	OLIGO	14.393333356	0	69	1	1	69			1494	44	1	.05081579199	1	1	0	0	0	0	0	0	0	0	1	1406.184	1591.547	1	28.89622	24.47183
70						7	W	527636	528508	biological process unknown	molecular function unknown					YGR021W	YGR021W||ebi.ac.uk:Database:sgd;A_06_P3241||www.chem.agilent.com:Database:agp		A_06_P3241	1083615	OLIGO	14.605000023	0	70	1	1	70			1515	45	1	.05132611969	1	1	0	0	0	0	0	0	0	0	1	1320.848	1214.416	1	16.89027	24.67247
71																	E1A_r60_a97||AgilentControlDB;(+)E1A_r60_a97||AgilentControlDB		(+)E1A_R60_A97	1545264	CONTROL	14.81666669	0	71	1	1	71			1536	44	1	.4968149281	1	1	0	0	0	0	0	0	0	0	0	43.47578	31.93748	1	6.161896	24.60215
72						14	W	330329	330547	biological process unknown	molecular function unknown					YNL162W-A	YNL162W-A||ebi.ac.uk:Database:sgd;A_06_P5934||www.chem.agilent.com:Database:agp		A_06_P5934	1083877	OLIGO	15.028333357	0	72	1	1	72			1557	45	1	.446829565	1	1	0	0	0	0	0	0	0	0	1	57.08435	29.33801	1	6.452219	24.64664
73					DIP5	16	W	41043	42869	amino acid transport	amino acid transporter activity*					YPL265W	YPL265W||ebi.ac.uk:Database:sgd;A_06_P7026||www.chem.agilent.com:Database:agp		A_06_P7026	1085839	OLIGO	15.240000024	0	73	1	1	73			1578	44	1	.08241965282	1	1	0	0	0	0	0	0	0	0	0	177.8541	859.0457	1	8.602609	24.1338
74					LYS4	4	W	931123	933204	lysine biosynthesis via aminoadipic acid	homoaconitate hydratase activity					YDR234W	YDR234W||ebi.ac.uk:Database:sgd;A_06_P2223||www.chem.agilent.com:Database:agp		A_06_P2223	1086414	OLIGO	15.451666691	0	74	1	1	74			1599	45	1	.05059842837	1	1	0	0	0	0	0	0	0	0	1	13052.69	19065.54	1	220.6661	24.18182
75						12	W	586466	587575	ubiquitin-dependent protein catabolism	protein binding					YLR224W	YLR224W||ebi.ac.uk:Database:sgd;A_06_P5038||www.chem.agilent.com:Database:agp		A_06_P5038	1085818	OLIGO	15.663333358	0	75	1	1	75			1620	44	1	.05091648879	1	1	0	0	0	0	0	0	0	0	1	1540.896	1361.273	1	25.05952	24.28214
76					RPN5	4	W	190925	192262	ubiquitin-dependent protein catabolism	molecular function unknown					YDL147W	YDL147W||ebi.ac.uk:Database:sgd;A_06_P1880||www.chem.agilent.com:Database:agp		A_06_P1880	1085476	OLIGO	15.875000025	0	76	1	1	76			1642	44	1	.04934976317	1	1	0	0	0	0	0	0	0	0	1	4376.049	4166.593	1	62.20119	24.5689
77					RSM25	9	C	188781	187987	protein biosynthesis	structural constituent of ribosome					YIL093C	YIL093C||ebi.ac.uk:Database:sgd;A_06_P3892||www.chem.agilent.com:Database:agp		A_06_P3892	1086183	OLIGO	16.086666692	0	77	1	1	77			1663	44	1	.05757989377	1	1	0	0	0	0	0	0	0	0	0	742.677	558.2367	1	14.34608	24.05763
78																	E1A_r60_n9||AgilentControlDB;(+)E1A_r60_n9||AgilentControlDB		(+)E1A_R60_N9	1545267	CONTROL	16.298333359	0	78	1	1	78			1684	45	1	.310713739	1	1	0	0	0	0	0	0	0	0	0	102.9137	32.01935	1	6.992363	24.23944
79					TOP1	15	C	315387	313078	regulation of transcription from RNA polymerase II promoter*	DNA topoisomerase type I activity					YOL006C	YOL006C||ebi.ac.uk:Database:sgd;A_06_P6196||www.chem.agilent.com:Database:agp		A_06_P6196	1083663	OLIGO	16.510000026	0	79	1	1	79			1706	43	1	.05488044523	1	1	0	0	0	0	0	1	0	0	0	1079.159	720.8784	1	18.78733	23.78652
80						4	C	1153618	1151795	protein biosynthesis	arginine-tRNA ligase activity					YDR341C	YDR341C||ebi.ac.uk:Database:sgd;A_06_P2332||www.chem.agilent.com:Database:agp		A_06_P2332	1082474	OLIGO	16.721666693	0	80	1	1	80			1726	45	1	.0492292029	1	1	0	0	0	0	0	0	0	0	1	6265.784	6142.052	1	97.2511	24.2397
81					RRP9	16	W	802355	804076	rRNA modification*	snoRNA binding					YPR137W	YPR137W||ebi.ac.uk:Database:sgd;A_06_P7185||www.chem.agilent.com:Database:agp		A_06_P7185	1083017	OLIGO	16.93333336	0	81	1	1	81			1747	44	1	.05030372545	1	1	0	0	0	0	0	0	0	0	1	1692.538	1763.684	1	27.57632	24.19203
82						13	W	284101	284640	methionine salvage	oxidoreductase activity, acting on single donors with incorporation of molecular oxygen, incorporation of two atoms of oxygen					YMR009W	YMR009W||ebi.ac.uk:Database:sgd;A_06_P5436||www.chem.agilent.com:Database:agp		A_06_P5436	1080730	OLIGO	17.145000027	0	82	1	1	82			1768	45	1	.05644784993	1	1	0	0	0	0	0	0	0	0	0	607.02	825.9504	1	16.24504	24.11111
83					TRM82	4	W	784866	786200	tRNA methylation	protein binding*					YDR165W	YDR165W||ebi.ac.uk:Database:sgd;A_06_P2153||www.chem.agilent.com:Database:agp		A_06_P2153	1082765	OLIGO	17.356666694	0	83	1	1	83			1790	44	1	.05243010479	1	1	0	0	0	0	0	0	0	0	1	988.9237	1041.149	1	16.54256	23.99288
84					KAP122	7	W	461671	464916	protein-nucleus import*	protein carrier activity					YGL016W	YGL016W||ebi.ac.uk:Database:sgd;A_06_P2971||www.chem.agilent.com:Database:agp		A_06_P2971	1084900	OLIGO	17.568333361	0	84	1	1	84			1811	45	1	.07688935291	1	1	0	0	0	0	0	0	0	0	0	395.6382	257.0652	1	11.61136	24.01408
85																	(+)E1A_r60_1||AgilentControlDB;E1A_r60_1||AgilentControlDB		(+)E1A_R60_1	1545263	CONTROL	17.780000028	0	85	1	1	85			1832	45	1	.242956719	1	1	0	0	0	1	0	0	0	0	0	129.1528	43.30535	1	7.798943	24.15867
86						8	C	47966	45927	metabolism	molecular function unknown					YHL029C	YHL029C||ebi.ac.uk:Database:sgd;A_06_P3547||www.chem.agilent.com:Database:agp		A_06_P3547	1086106	OLIGO	17.991666695	0	86	1	1	86			1853	45	1	.06204530777	1	1	0	0	0	0	0	0	0	0	0	620.248	422.9269	1	12.76924	23.94643
87					FIN1	4	C	716617	715742	biological process unknown	protein binding					YDR130C	YDR130C||ebi.ac.uk:Database:sgd;A_06_P2118||www.chem.agilent.com:Database:agp		A_06_P2118	1084476	OLIGO	18.203333362	0	87	1	1	87			1874	44	1	.06689319035	1	1	0	0	0	0	0	0	0	0	0	476.2833	359.9478	1	11.68537	24.13732
88					PTK1	11	C	70223	68274	polyamine transport	protein kinase activity					YKL198C	YKL198C||ebi.ac.uk:Database:sgd;A_06_P4611||www.chem.agilent.com:Database:agp		A_06_P4611	1081282	OLIGO	18.415000029	0	88	1	1	88			1896	44	1	.06937657596	1	1	0	0	0	0	0	0	0	0	0	830.0237	291.9699	1	16.11677	24.41259
89						2	W	443246	443584							YBR100W	YBR100W||ebi.ac.uk:Database:sgd;A_06_P1351||www.chem.agilent.com:Database:agp		A_06_P1351	1084713	OLIGO	18.626666696	0	89	1	1	89			1917	44	1	.08427320956	1	1	0	0	0	0	0	0	0	0	1	315.0368	234.2628	1	9.675991	24.34276
90					TIF4632	7	C	409607	406863	translational initiation	translation initiation factor activity					YGL049C	YGL049C||ebi.ac.uk:Database:sgd;A_06_P3004||www.chem.agilent.com:Database:agp		A_06_P3004	1086394	OLIGO	18.838333363	0	90	1	1	90			1938	45	1	.05277212213	1	1	0	0	0	0	0	0	0	0	0	1121.507	918.8786	1	20.88534	23.97398
91					RPN13	12	C	965556	965086	proteolysis and peptidolysis	endopeptidase activity					YLR421C	YLR421C||ebi.ac.uk:Database:sgd;A_06_P5239||www.chem.agilent.com:Database:agp		A_06_P5239	1081178	OLIGO	19.05000003	0	91	1	1	91			1959	44	1	.05060402521	1	1	0	0	0	0	0	0	0	0	1	1503.417	1575.503	1	28.12484	23.97842
92																	E1A_r60_n9||AgilentControlDB;(+)E1A_r60_n9||AgilentControlDB		(+)E1A_R60_N9	1545267	CONTROL	19.261666697	0	92	1	1	92			1980	44	1	.2899728287	1	1	0	0	0	0	0	0	0	1	0	116.4341	32.02217	1	6.702432	24.47931
93					SEC9	7	C	511006	509051	vesicle fusion*	t-SNARE activity					YGR009C	YGR009C||ebi.ac.uk:Database:sgd;A_06_P3229||www.chem.agilent.com:Database:agp		A_06_P3229	1081317	OLIGO	19.473333364	0	93	1	1	93			2001	44	1	.05230091786	1	1	0	0	0	0	0	0	0	0	0	3203.774	1915.801	1	44.79691	24.06294
94					BNI5	14	C	323565	322219	cytokinesis*	molecular function unknown					YNL166C	YNL166C||ebi.ac.uk:Database:sgd;A_06_P5938||www.chem.agilent.com:Database:agp		A_06_P5938	1083352	OLIGO	19.685000031	0	94	1	1	94			2023	45	1	.05295204892	1	1	0	0	0	0	0	0	0	0	0	1410.084	968.4181	1	25.21661	24.35862
95					RBL2	15	W	820451	820771	microtubule cytoskeleton organization and biogenesis*	tubulin binding*					YOR265W	YOR265W||ebi.ac.uk:Database:sgd;A_06_P6626||www.chem.agilent.com:Database:agp		A_06_P6626	1084454	OLIGO	19.896666698	0	95	1	1	95			2044	44	1	.05749718671	1	1	0	0	0	0	0	0	0	0	1	619.0355	619.4491	1	17.38661	24.15636
96					LCB2	4	W	576470	578155	sphingolipid biosynthesis	serine C-palmitoyltransferase activity					YDR062W	YDR062W||ebi.ac.uk:Database:sgd;A_06_P2049||www.chem.agilent.com:Database:agp		A_06_P2049	1083061	OLIGO	20.108333365	0	96	1	1	96			2065	45	1	.05039505608	1	1	0	0	0	0	0	0	0	0	0	2550.43	2002.765	1	44.46932	24.17014
97					DER1	2	W	623572	624207	ER-associated protein catabolism	molecular function unknown					YBR201W	YBR201W||ebi.ac.uk:Database:sgd;A_06_P1454||www.chem.agilent.com:Database:agp		A_06_P1454	1086062	OLIGO	20.320000032	0	97	1	1	97			2086	44	1	.06210905171	1	1	0	0	0	0	0	0	0	0	1	450.193	536.3639	1	12.75655	23.78182
98					YMR1	10	W	633530	635596	vesicle-mediated transport*	phosphoric monoester hydrolase activity*					YJR110W	YJR110W||ebi.ac.uk:Database:sgd;A_06_P4353||www.chem.agilent.com:Database:agp		A_06_P4353	1081266	OLIGO	20.531666699	0	98	1	1	98			2107	45	1	.052836396	1	1	0	0	0	0	0	0	0	0	1	929.3703	982.6014	1	18.96696	24.23843
99																	(+)E1A_r60_a20||AgilentControlDB;E1A_r60_a20||AgilentControlDB		(+)E1A_R60_A20	1545259	CONTROL	20.743333366	0	99	1	1	99			2129	44	1	.2640946213	1	1	0	0	0	0	0	0	0	0	0	107.4504	44.88662	1	7.099402	24.14286
100						12	W	370792	371211							YLR112W	YLR112W||ebi.ac.uk:Database:sgd;A_06_P4925||www.chem.agilent.com:Database:agp		A_06_P4925	1083997	OLIGO	20.955000033	0	100	1	1	100			2150	45	1	.08068833457	1	1	0	0	0	0	0	0	0	0	1	343.0246	247.6594	1	10.94372	23.9788
101					RCR2	4	W	454119	454751	biological process unknown	molecular function unknown					YDR003W	YDR003W||ebi.ac.uk:Database:sgd;A_06_P1988||www.chem.agilent.com:Database:agp		A_06_P1988	1084276	OLIGO	21.1666667	0	101	1	1	101			2170	44	1	.04990996582	1	1	0	0	0	0	0	0	0	0	1	2103.021	2248.155	1	29.69449	23.85053
102						14	W	31049	31444							YNL324W	YNL324W||ebi.ac.uk:Database:sgd;A_06_P6096||www.chem.agilent.com:Database:agp		A_06_P6096	1082641	OLIGO	21.378333367	0	102	1	1	102			2191	44	1	.4250816176	1	1	0	0	0	0	0	0	0	0	0	58.69967	31.73066	1	5.999676	23.86268
103					AYT1	12	C	16072	14648	secondary metabolism	trichothecene 3-O-acetyltransferase activity					YLL063C	YLL063C||ebi.ac.uk:Database:sgd;A_06_P4808||www.chem.agilent.com:Database:agp		A_06_P4808	1083192	OLIGO	21.590000034	0	103	1	1	103			2213	44	1	.06027337625	1	1	0	0	0	0	0	0	0	0	0	488.6027	589.8239	1	14.41049	24.04511
104						8	W	465177	465668							YHR180W	YHR180W||ebi.ac.uk:Database:sgd;A_06_P3758||www.chem.agilent.com:Database:agp		A_06_P3758	1083832	OLIGO	21.801666701	0	104	1	1	104			2234	45	1	.2386513147	1	1	0	0	0	0	0	0	0	0	0	115.9736	51.85542	1	8.364613	24.07241
105																	(-)3xSLv1||AgilentControlDB;NegativeControl||AgilentControlDB		(-)3XSLV1	1080867	CONTROL	22.013333368	0	105	1	1	105			2255	45	1	.3754640931	1	1	0	0	0	1	0	0	0	0	0	65.13648	36.97621	1	5.808349	23.84116
106																	BrightCorner||AgilentControlDB		BRIGHTCORNER	1085833	CONTROL	22.225000035	0	106	1	1	106			2276	44	1	.1600687673	1	1	0	0	1	0	0	0	0	0	0	89372.04	36.80361	1	1678.665	24.07368
107																	BrightCorner||AgilentControlDB		BRIGHTCORNER	1085833	CONTROL	22.436666702	0	107	1	1	107			2298	44	1	.1600929392	1	1	0	0	0	0	0	0	0	0	0	80936.03	45.22453	1	1257.71	23.31034
108																	(-)3xSLv1||AgilentControlDB;NegativeControl||AgilentControlDB		(-)3XSLV1	1080867	CONTROL	0	.188148148	1	2	1	108			54	62	1	.3228287627	1	1	0	0	0	1	0	0	0	0	0	76.75725	42.66746	1	4.85416	24.91255
109																	(-)3xSLv1||AgilentControlDB;NegativeControl||AgilentControlDB		(-)3XSLV1	1080867	CONTROL	.211666667	.188148148	2	2	1	109			75	63	1	.4392247359	1	1	0	0	0	0	0	0	0	0	0	50.64553	35.06869	1	5.885341	26.05469
110					RPC34	14	C	635297	634344	transcription from RNA polymerase III promoter	DNA-directed RNA polymerase activity					YNR003C	YNR003C||ebi.ac.uk:Database:sgd;A_06_P6114||www.chem.agilent.com:Database:agp		A_06_P6114	1083705	OLIGO	.423333334	.188148148	3	2	1	110			97	62	1	.0514922336	1	1	0	0	0	0	0	0	0	0	0	1320.283	1791.441	1	19.27035	25.85714
111					HHO1	16	C	309603	308827	regulation of transcription, DNA-dependent*	DNA binding					YPL127C	YPL127C||ebi.ac.uk:Database:sgd;A_06_P6886||www.chem.agilent.com:Database:agp		A_06_P6886	1080728	OLIGO	.635000001	.188148148	4	2	1	111			118	63	1	.0515545533	1	1	0	0	0	0	0	0	0	0	0	4451.741	2800.099	1	62.80594	25.78067
112					KAR1	14	W	286307	287608	spindle pole body duplication in nuclear envelope*	protein binding					YNL188W	YNL188W||ebi.ac.uk:Database:sgd;A_06_P5960||www.chem.agilent.com:Database:agp		A_06_P5960	1083647	OLIGO	.846666668	.188148148	5	2	1	112			139	62	1	.05549659371	1	1	0	0	0	0	0	0	0	0	0	1010.857	671.3507	1	18.0877	25.76953
113						11	W	382141	382746							YKL030W	YKL030W||ebi.ac.uk:Database:sgd;A_06_P4438||www.chem.agilent.com:Database:agp		A_06_P4438	1084238	OLIGO	1.058333335	.188148148	6	2	1	113			160	63	1	.2623629359	1	1	0	0	0	0	0	0	0	0	1	86.367	59.02113	1	6.727409	25.72868
114					DBF20	16	W	747304	748998	protein amino acid phosphorylation*	protein serine/threonine kinase activity					YPR111W	YPR111W||ebi.ac.uk:Database:sgd;A_06_P7158||www.chem.agilent.com:Database:agp		A_06_P7158	1083128	OLIGO	1.270000002	.188148148	7	2	1	114			181	62	1	.06594096672	1	1	0	0	0	0	0	0	0	0	0	494.6846	370.946	1	9.212692	25.79851
115						9	W	249989	251911	biological process unknown	molecular function unknown					YIL056W	YIL056W||ebi.ac.uk:Database:sgd;A_06_P3856||www.chem.agilent.com:Database:agp		A_06_P3856	1082568	OLIGO	1.481666669	.188148148	8	2	1	115			202	63	1	.07912745953	1	1	0	0	0	0	0	0	0	0	1	327.6214	272.9301	1	12.61579	25.73529
116						9	W	278425	279846	biological process unknown	molecular function unknown					YIL039W	YIL039W||ebi.ac.uk:Database:sgd;A_06_P3839||www.chem.agilent.com:Database:agp		A_06_P3839	1081123	OLIGO	1.693333336	.188148148	9	2	1	116			224	62	1	.0505584042	1	1	0	0	0	0	0	0	0	0	1	1681.378	1529.29	1	23.97967	25.25887
117					PFD1	10	W	88785	89114	protein folding*	unfolded protein binding					YJL179W	YJL179W||ebi.ac.uk:Database:sgd;A_06_P4201||www.chem.agilent.com:Database:agp		A_06_P4201	1082221	OLIGO	1.905000003	.188148148	10	2	1	117			245	63	1	.05329347514	1	1	0	0	0	0	0	0	0	0	0	923.8024	1377.467	1	13.69757	26.07326
118					PEX1	11	C	73870	70739	peroxisome organization and biogenesis	ATPase activity					YKL197C	YKL197C||ebi.ac.uk:Database:sgd;A_06_P4610||www.chem.agilent.com:Database:agp		A_06_P4610	1086252	OLIGO	2.11666667	.188148148	11	2	1	118			266	62	1	.0528209719	1	1	0	0	0	0	0	0	0	0	1	941.1997	968.7426	1	16.36479	26.04869
119					IWR1	4	C	254717	253995	meiosis	molecular function unknown					YDL115C	YDL115C||ebi.ac.uk:Database:sgd;A_06_P1846||www.chem.agilent.com:Database:agp		A_06_P1846	1085268	OLIGO	2.328333337	.188148148	12	2	1	119			287	62	1	.05104510915	1	1	0	0	0	0	0	0	0	0	1	1495.591	1311.676	1	24.24004	25.60432
120						7	W	976420	976728							YGR242W	YGR242W||ebi.ac.uk:Database:sgd;A_06_P3463||www.chem.agilent.com:Database:agp		A_06_P3463	1082147	OLIGO	2.540000004	.188148148	13	2	1	120			308	62	1	.3490421084	1	1	0	0	0	0	0	0	0	0	1	64.49545	43.90805	1	5.077224	25.53629
121					FUR4	2	W	281443	283344	uracil transport	uracil permease activity					YBR021W	YBR021W||ebi.ac.uk:Database:sgd;A_06_P1268||www.chem.agilent.com:Database:agp		A_06_P1268	1081076	OLIGO	2.751666671	.188148148	14	2	1	121			330	63	1	.05293420187	1	1	0	0	0	0	0	0	0	0	0	1278.702	929.3967	1	22.93258	25.65217
122					APC11	4	W	433494	433991	mitotic sister chromatid segregation*	protein binding*					YDL008W	YDL008W||ebi.ac.uk:Database:sgd;A_06_P1736||www.chem.agilent.com:Database:agp		A_06_P1736	1085499	OLIGO	2.963333338	.188148148	15	2	1	122			350	62	1	.09493604012	1	1	0	0	0	0	0	0	0	0	1	232.1715	223.2146	1	8.846348	25.77491
123					PEX14	7	W	216278	217303	protein-peroxisome targeting*	protein binding					YGL153W	YGL153W||ebi.ac.uk:Database:sgd;A_06_P3108||www.chem.agilent.com:Database:agp		A_06_P3108	1082317	OLIGO	3.175000005	.188148148	16	2	1	123			372	63	1	.05845659823	1	1	0	0	0	0	0	0	0	0	0	960.1555	531.7756	1	15.20821	25.93657
124					CHS6	10	W	239331	241571	Golgi to plasma membrane transport*	molecular function unknown					YJL099W	YJL099W||ebi.ac.uk:Database:sgd;A_06_P4121||www.chem.agilent.com:Database:agp		A_06_P4121	1080962	OLIGO	3.386666672	.188148148	17	2	1	124			393	62	1	.07187664164	1	1	0	0	0	0	0	0	0	0	1	402.9573	313.9017	1	10.33556	25.58065
125						2	C	744393	742756	biological process unknown	molecular function unknown					YBR270C	YBR270C||ebi.ac.uk:Database:sgd;A_06_P1524||www.chem.agilent.com:Database:agp		A_06_P1524	1083114	OLIGO	3.598333339	.188148148	18	2	1	125			414	63	1	.07902715764	1	1	0	0	0	0	0	0	0	0	1	306.4578	291.3713	1	10.82524	25.51471
126					BBP1	16	W	67725	68882	microtubule nucleation*	structural constituent of cytoskeleton					YPL255W	YPL255W||ebi.ac.uk:Database:sgd;A_06_P7016||www.chem.agilent.com:Database:agp		A_06_P7016	1085728	OLIGO	3.810000006	.188148148	19	2	1	126			436	62	1	.06272397821	1	1	0	0	0	0	0	0	0	0	0	614.0887	406.8767	1	16.13617	25.94928
127					MRPS16	16	C	529347	528982	protein biosynthesis	structural constituent of ribosome					YPL013C	YPL013C||ebi.ac.uk:Database:sgd;A_06_P6772||www.chem.agilent.com:Database:agp		A_06_P6772	1086004	OLIGO	4.021666673	.188148148	20	2	1	127			457	63	1	.05066211691	1	1	0	0	0	0	0	0	0	0	1	1477.865	1529.899	1	23.58113	25.86429
128					ALD2	13	C	603081	601561	aldehyde metabolism*	aldehyde dehydrogenase activity					YMR170C	YMR170C||ebi.ac.uk:Database:sgd;A_06_P5605||www.chem.agilent.com:Database:agp		A_06_P5605	1081070	OLIGO	4.23333334	.188148148	21	2	1	128			477	62	1	.05047892037	1	1	0	0	0	0	0	0	0	0	1	1586.105	1613.654	1	27.29136	25.89493
129						1	W	45900	48251	biological process unknown	molecular function unknown					YAL053W	YAL053W||ebi.ac.uk:Database:sgd;A_06_P1077||www.chem.agilent.com:Database:agp		A_06_P1077	1082743	OLIGO	4.445000007	.188148148	22	2	1	129			498	63	1	.05047833521	1	1	0	0	0	0	0	0	0	0	1	5901.22	4177.992	1	87.83948	25.87591
130					DBR1	11	C	168834	167617	snoRNA metabolism*	RNA lariat debranching enzyme activity					YKL149C	YKL149C||ebi.ac.uk:Database:sgd;A_06_P4561||www.chem.agilent.com:Database:agp		A_06_P4561	1083769	OLIGO	4.656666674	.188148148	23	2	1	130			520	62	1	.05880809785	1	1	0	0	0	0	0	0	0	0	1	580.0545	564.8971	1	12.14783	25.68401
131					PEX15	15	W	247148	248299	peroxisome organization and biogenesis*	molecular function unknown					YOL044W	YOL044W||ebi.ac.uk:Database:sgd;A_06_P6235||www.chem.agilent.com:Database:agp		A_06_P6235	1085417	OLIGO	4.868333341	.188148148	24	2	1	131			541	63	1	.05463187171	1	1	0	0	0	0	0	0	0	0	1	782.2385	766.8307	1	13.07937	25.5316
132						12	W	472114	472458	biological process unknown	molecular function unknown					YLR156W	YLR156W||ebi.ac.uk:Database:sgd;A_06_P4970||www.chem.agilent.com:Database:agp		A_06_P4970	1084588	OLIGO	5.080000008	.188148148	25	2	1	132			562	62	1	.08291105126	1	1	0	0	0	0	0	0	0	0	0	621.5954	172.6547	1	12.95827	25.00382
133						16	W	758646	759479	biological process unknown	molecular function unknown					YPR116W	YPR116W||ebi.ac.uk:Database:sgd;A_06_P7163||www.chem.agilent.com:Database:agp		A_06_P7163	1083428	OLIGO	5.291666675	.188148148	26	2	1	133			584	63	1	.07754247	1	1	0	0	0	0	0	0	0	0	0	428.2094	238.5703	1	10.40996	25.36567
134					RRN11	13	C	191767	190244	transcription from RNA polymerase I promoter	RNA polymerase I transcription factor activity					YML043C	YML043C||ebi.ac.uk:Database:sgd;A_06_P5331||www.chem.agilent.com:Database:agp		A_06_P5331	1082512	OLIGO	5.503333342	.188148148	27	2	1	134			605	62	1	.05382547521	1	1	0	0	0	0	0	0	0	0	1	814.3582	879.9685	1	16.64373	25.65441
135						9	W	189063	190964	biological process unknown	molecular function unknown					YIL092W	YIL092W||ebi.ac.uk:Database:sgd;A_06_P3891||www.chem.agilent.com:Database:agp		A_06_P3891	1080819	OLIGO	5.715000009	.188148148	28	2	1	135			626	63	1	.07099198704	1	1	0	0	0	0	0	0	0	0	1	410.936	322.6064	1	15.38361	26.25641
136					FPR3	13	C	121324	120089	biological process unknown	peptidyl-prolyl cis-trans isomerase activity					YML074C	YML074C||ebi.ac.uk:Database:sgd;A_06_P5363||www.chem.agilent.com:Database:agp		A_06_P5363	1082913	OLIGO	5.926666676	.188148148	29	2	1	136			647	62	1	.04962331718	1	1	0	0	0	0	0	0	0	0	1	4810.663	4039.745	1	70.15758	25.84701
137					PBP4	4	C	362256	361699	biological process unknown	molecular function unknown					YDL053C	YDL053C||ebi.ac.uk:Database:sgd;A_06_P1782||www.chem.agilent.com:Database:agp		A_06_P1782	1084079	OLIGO	6.138333343	.188148148	30	2	1	137			668	63	1	.05033780838	1	1	0	0	0	0	0	0	0	0	0	1975.422	2467.597	1	24.16701	25.68248
138					NAT5	15	W	804376	804906	protein amino acid acetylation	peptide alpha-N-acetyltransferase activity					YOR253W	YOR253W||ebi.ac.uk:Database:sgd;A_06_P6614||www.chem.agilent.com:Database:agp		A_06_P6614	1086675	OLIGO	6.35000001	.188148148	31	2	1	138			690	62	1	.0496837232	1	1	0	0	0	0	0	0	0	0	1	2651.339	2512.259	1	41.02543	25.7033
139					ADK2	5	W	525969	526646	nucleotide metabolism	adenylate kinase activity					YER170W	YER170W||ebi.ac.uk:Database:sgd;A_06_P2802||www.chem.agilent.com:Database:agp		A_06_P2802	1080646	OLIGO	6.561666677	.188148148	32	2	1	139			710	63	1	.1083316664	1	1	0	0	0	0	0	0	0	0	1	202.3351	181.3463	1	7.918991	26.23106
140					IDP2	12	W	504593	505831	glutamate biosynthesis*	isocitrate dehydrogenase (NADP+) activity					YLR174W	YLR174W||ebi.ac.uk:Database:sgd;A_06_P4988||www.chem.agilent.com:Database:agp		A_06_P4988	1083584	OLIGO	6.773333344	.188148148	33	2	1	140			732	62	1	.06145159573	1	1	0	0	0	0	0	0	0	0	1	533.909	474.518	1	11.97199	26.28185
141					SMM1	14	W	653387	654541	tRNA modification*	tRNA dihydrouridine synthase activity					YNR015W	YNR015W||ebi.ac.uk:Database:sgd;A_06_P6126||www.chem.agilent.com:Database:agp		A_06_P6126	1081636	OLIGO	6.985000011	.188148148	34	2	1	141			753	63	1	.07582869497	1	1	0	0	0	0	0	0	0	0	1	324.9694	315.4888	1	9.874394	26.08679
142						2	C	615851	615198	biological process unknown	molecular function unknown					YBR197C	YBR197C||ebi.ac.uk:Database:sgd;A_06_P1450||www.chem.agilent.com:Database:agp		A_06_P1450	1081409	OLIGO	7.196666678	.188148148	35	2	1	142			774	62	1	.06443830144	1	1	0	0	0	0	0	0	0	0	1	470.7452	420.5643	1	11.79796	26.0751
143					RBS1	4	W	122217	123590	galactose metabolism	molecular function unknown					YDL189W	YDL189W||ebi.ac.uk:Database:sgd;A_06_P1924||www.chem.agilent.com:Database:agp		A_06_P1924	1086010	OLIGO	7.408333345	.188148148	36	2	1	143			795	63	1	.0509896658	1	1	0	0	0	0	0	0	0	0	1	1329.229	1413.866	1	24.22521	26.65455
144					SVL3	16	C	491362	488885	endocytosis	molecular function unknown					YPL032C	YPL032C||ebi.ac.uk:Database:sgd;A_06_P6791||www.chem.agilent.com:Database:agp		A_06_P6791	1085653	OLIGO	7.620000012	.188148148	37	2	1	144			816	62	1	.05543593575	1	1	0	0	0	0	0	0	0	0	0	822.6171	671.1209	1	15.6323	26.62182
145					HRK1	15	C	824864	822585	cell ion homeostasis	protein kinase activity					YOR267C	YOR267C||ebi.ac.uk:Database:sgd;A_06_P6628||www.chem.agilent.com:Database:agp		A_06_P6628	1085793	OLIGO	7.831666679	.188148148	38	2	1	145			837	63	1	.05536738472	1	1	0	0	0	0	0	0	0	0	0	849.1668	672.1744	1	17.4556	26.52206
146						4	W	1039722	1042955	biological process unknown	helicase activity					YDR291W	YDR291W||ebi.ac.uk:Database:sgd;A_06_P2280||www.chem.agilent.com:Database:agp		A_06_P2280	1080686	OLIGO	8.043333346	.188148148	39	2	1	146			859	62	1	.05276555766	1	1	0	0	0	0	0	0	0	0	1	941.6892	987.2354	1	19.0557	26.43284
147					FES1	2	C	444687	443815	protein biosynthesis	adenyl-nucleotide exchange factor activity					YBR101C	YBR101C||ebi.ac.uk:Database:sgd;A_06_P1352||www.chem.agilent.com:Database:agp		A_06_P1352	1082744	OLIGO	8.255000013	.188148148	40	2	1	147			880	63	1	.04983825829	1	1	0	0	0	0	0	0	0	0	1	2592.041	3048.193	1	43.55568	26.58889
148					RIM11	13	W	546124	547236	protein amino acid phosphorylation*	protein serine/threonine kinase activity*					YMR139W	YMR139W||ebi.ac.uk:Database:sgd;A_06_P5571||www.chem.agilent.com:Database:agp		A_06_P5571	1081348	OLIGO	8.46666668	.188148148	41	2	1	148			901	62	1	.05518428485	1	1	0	0	0	0	0	0	0	0	1	818.8942	691.5691	1	16.64859	26.96538
149						9	W	246911	247195							YIL058W	YIL058W||ebi.ac.uk:Database:sgd;A_06_P3858||www.chem.agilent.com:Database:agp		A_06_P3858	1080906	OLIGO	8.678333347	.188148148	42	2	1	149			922	63	1	.2633940695	1	1	0	0	0	0	0	0	0	0	1	84.22309	60.16236	1	7.342991	26.47955
150					TDP1	2	C	670292	668658	DNA repair	tyrosyl-DNA phosophodiesterase activity					YBR223C	YBR223C||ebi.ac.uk:Database:sgd;A_06_P1476||www.chem.agilent.com:Database:agp		A_06_P1476	1082076	OLIGO	8.890000014	.188148148	43	2	1	150			943	62	1	.06937749005	1	1	0	0	0	0	0	0	0	0	1	350.4767	410.0832	1	10.56517	26.35357
151						16	W	841262	842665	biological process unknown	molecular function unknown					YPR157W	YPR157W||ebi.ac.uk:Database:sgd;A_06_P7205||www.chem.agilent.com:Database:agp		A_06_P7205	1086308	OLIGO	9.101666681	.188148148	44	2	1	151			964	64	1	.06018562477	1	1	0	0	0	0	0	0	0	0	0	461.1765	786.5021	1	12.50667	26.15589
152					STT4	12	C	743865	738163	actin cytoskeleton organization and biogenesis*	1-phosphatidylinositol 4-kinase activity					YLR305C	YLR305C||ebi.ac.uk:Database:sgd;A_06_P5121||www.chem.agilent.com:Database:agp		A_06_P5121	1086821	OLIGO	9.313333348	.188148148	45	2	1	152			986	62	1	.05125049225	1	1	0	0	0	0	0	0	0	0	0	2595.851	1788.98	1	47.49308	26.15385
153						12	W	255307	257856	biological process unknown	molecular function unknown					YLR057W	YLR057W||ebi.ac.uk:Database:sgd;A_06_P4869||www.chem.agilent.com:Database:agp		A_06_P4869	1082460	OLIGO	9.525000015	.188148148	46	2	1	153			1006	63	1	.05219494786	1	1	0	0	0	0	0	0	0	0	1	1067.456	1035.961	1	21.56002	26.67399
154					RIM13	13	C	568181	565998	protein processing	cysteine-type endopeptidase activity					YMR154C	YMR154C||ebi.ac.uk:Database:sgd;A_06_P5587||www.chem.agilent.com:Database:agp		A_06_P5587	1081933	OLIGO	9.736666682	.188148148	47	2	1	154			1028	63	1	.09804190941	1	1	0	0	0	0	0	0	0	0	0	280.4359	171.8213	1	8.403562	26.51527
155						11	W	491007	493304	biological process unknown	molecular function unknown					YKR027W	YKR027W||ebi.ac.uk:Database:sgd;A_06_P4664||www.chem.agilent.com:Database:agp		A_06_P4664	1080694	OLIGO	9.948333349	.188148148	48	2	1	155			1049	63	1	.0672179965	1	1	0	0	0	0	0	0	0	0	0	608.1451	321.1707	1	13.18521	26.57087
156					SRL1	15	W	797676	798308	nucleobase, nucleoside, nucleotide and nucleic acid metabolism	molecular function unknown					YOR247W	YOR247W||ebi.ac.uk:Database:sgd;A_06_P6608||www.chem.agilent.com:Database:agp		A_06_P6608	1084897	OLIGO	10.160000016	.188148148	49	2	1	156			1070	62	1	.04945381201	1	1	0	0	0	0	0	0	0	0	1	4171.275	3779.636	1	51.80042	26.44643
157					RIB1	2	C	159696	158659	riboflavin biosynthesis	cyclohydrolase activity					YBL033C	YBL033C||ebi.ac.uk:Database:sgd;A_06_P1163||www.chem.agilent.com:Database:agp		A_06_P1163	1083460	OLIGO	10.371666683	.188148148	50	2	1	157			1092	63	1	.05194361696	1	1	0	0	0	0	0	0	0	0	1	1068.052	1148.694	1	18.39256	26.74517
158					NUG1	5	W	162722	164284	rRNA processing	GTPase activity					YER006W	YER006W||ebi.ac.uk:Database:sgd;A_06_P2627||www.chem.agilent.com:Database:agp		A_06_P2627	1083897	OLIGO	10.58333335	.188148148	51	2	1	158			1112	62	1	.04994723094	1	1	0	0	0	0	0	0	0	0	1	3381.134	4289.865	1	43.17176	26.40684
159					MOT2	5	W	293048	294811	regulation of transcription from RNA polymerase II promoter*	3'-5'-exoribonuclease activity*					YER068W	YER068W||ebi.ac.uk:Database:sgd;A_06_P2699||www.chem.agilent.com:Database:agp		A_06_P2699	1084068	OLIGO	10.795000017	.188148148	52	2	1	159			1134	63	1	.05180131943	1	1	0	0	0	0	0	0	0	0	0	1329.57	1100.185	1	24.02073	26.79116
160						16	W	931372	932784	biological process unknown	molecular function unknown					YPR196W	YPR196W||ebi.ac.uk:Database:sgd;A_06_P7244||www.chem.agilent.com:Database:agp		A_06_P7244	1086839	OLIGO	11.006666684	.188148148	53	2	1	160			1155	62	1	.1465823168	1	1	0	0	0	0	0	0	0	0	1	164.6846	108.2894	1	10.70768	26.55636
161						11	W	506159	506473							YKR032W	YKR032W||ebi.ac.uk:Database:sgd;A_06_P4669||www.chem.agilent.com:Database:agp		A_06_P4669	1081632	OLIGO	11.218333351	.188148148	54	2	1	161			1176	63	1	.4187937497	1	1	0	0	0	0	0	0	0	0	0	59.72928	32.12723	1	7.985452	26.36559
162					ASM4	4	C	300003	298417	mRNA-nucleus export*	structural molecule activity					YDL088C	YDL088C||ebi.ac.uk:Database:sgd;A_06_P1818||www.chem.agilent.com:Database:agp		A_06_P1818	1083551	OLIGO	11.430000018	.188148148	55	2	1	162			1197	62	1	.05025159686	1	1	0	0	0	0	0	0	0	0	1	1732.754	1804.757	1	32.131	26.2952
163					UGO1	4	C	1401204	1399696	transport*	transporter activity					YDR470C	YDR470C||ebi.ac.uk:Database:sgd;A_06_P2463||www.chem.agilent.com:Database:agp		A_06_P2463	1083964	OLIGO	11.641666685	.188148148	56	2	1	163			1219	63	1	.06488060832	1	1	0	0	0	0	0	0	0	0	1	475.954	405.1914	1	11.75552	26.60714
164					LRE1	3	W	35865	37616	cell wall organization and biogenesis*	transcription regulator activity*					YCL051W	YCL051W||ebi.ac.uk:Database:sgd;A_06_P1603||www.chem.agilent.com:Database:agp		A_06_P1603	1085024	OLIGO	11.853333352	.188148148	57	2	1	164			1239	62	1	.05221069032	1	1	0	0	0	0	0	0	0	0	0	1597.048	1125.371	1	18.65311	26.95652
165					MNS1	10	W	667559	669208	protein amino acid N-linked glycosylation*	mannosyl-oligosaccharide 1,2-alpha-mannosidase activity					YJR131W	YJR131W||ebi.ac.uk:Database:sgd;A_06_P4374||www.chem.agilent.com:Database:agp		A_06_P4374	1081109	OLIGO	12.065000019	.188148148	58	2	1	165			1261	63	1	.05125273303	1	1	0	0	0	0	0	0	0	0	1	1334.118	1237.792	1	17.58891	26.32852
166					DBP5	15	C	415907	414459	mRNA-nucleus export	RNA helicase activity					YOR046C	YOR046C||ebi.ac.uk:Database:sgd;A_06_P6408||www.chem.agilent.com:Database:agp		A_06_P6408	1084627	OLIGO	12.276666686	.188148148	59	2	1	166			1282	62	1	.04965392599	1	1	0	0	0	0	0	0	0	0	1	6123.783	7546.351	1	97.14412	25.88679
167					CCT7	10	W	207794	209446	protein folding*	unfolded protein binding					YJL111W	YJL111W||ebi.ac.uk:Database:sgd;A_06_P4133||www.chem.agilent.com:Database:agp		A_06_P4133	1084030	OLIGO	12.488333353	.188148148	60	2	1	167			1303	64	1	.04922677492	1	1	0	0	0	0	0	0	0	0	1	6290.053	6189.216	1	80.90476	26.17669
168					LEU9	15	W	523027	524841	leucine biosynthesis	2-isopropylmalate synthase activity					YOR108W	YOR108W||ebi.ac.uk:Database:sgd;A_06_P6470||www.chem.agilent.com:Database:agp		A_06_P6470	1084759	OLIGO	12.70000002	.188148148	61	2	1	168			1323	63	1	.05016289443	1	1	0	0	0	0	0	0	0	0	1	1807.365	1891.265	1	25.89989	26.33696
169					TCM10	4	C	1178165	1176330	protein complex assembly	molecular function unknown					YDR350C	YDR350C||ebi.ac.uk:Database:sgd;A_06_P2341||www.chem.agilent.com:Database:agp		A_06_P2341	1082025	OLIGO	12.911666687	.188148148	62	2	1	169			1345	63	1	.05738661331	1	1	0	0	0	0	0	0	0	0	0	718.2425	572.8542	1	18.24808	26.72862
170					CFT1	4	W	1063346	1067419	mRNA polyadenylylation*	RNA binding					YDR301W	YDR301W||ebi.ac.uk:Database:sgd;A_06_P2290||www.chem.agilent.com:Database:agp		A_06_P2290	1082672	OLIGO	13.123333354	.188148148	63	2	1	170			1367	62	1	.05044321474	1	1	0	0	0	0	0	0	0	0	0	3519.759	2596.613	1	55.07968	26.56877
171					BUD7	15	W	878431	880671	bud site selection	molecular function unknown					YOR299W	YOR299W||ebi.ac.uk:Database:sgd;A_06_P6661||www.chem.agilent.com:Database:agp		A_06_P6661	1086239	OLIGO	13.335000021	.188148148	64	2	1	171			1388	63	1	.05089698091	1	1	0	0	0	0	0	0	0	0	1	1452.659	1365.046	1	20.32446	26.32727
172					SPS2	4	C	1485293	1483785	sporulation (sensu Fungi)*	molecular function unknown					YDR522C	YDR522C||ebi.ac.uk:Database:sgd;A_06_P2515||www.chem.agilent.com:Database:agp		A_06_P2515	1085404	OLIGO	13.546666688	.188148148	65	2	1	172			1409	62	1	.4360318257	1	1	0	0	0	0	0	0	0	0	0	55.57277	32.01238	1	6.596175	25.94737
173						4	W	1523232	1523594	biological process unknown	molecular function unknown					YDR542W	YDR542W||ebi.ac.uk:Database:sgd;A_06_P2536||www.chem.agilent.com:Database:agp		A_06_P2536	1081345	OLIGO	13.758333355	.188148148	66	2	1	173			1430	63	1	.0531245422	1	1	0	0	0	0	0	0	0	0	1	882.6342	970.2616	1	15.41467	25.70039
174					SPC34	11	C	511439	510552	mitotic spindle organization and biogenesis in nucleus*	structural constituent of cytoskeleton					YKR037C	YKR037C||ebi.ac.uk:Database:sgd;A_06_P4675||www.chem.agilent.com:Database:agp		A_06_P4675	1080917	OLIGO	13.970000022	.188148148	67	2	1	174			1451	62	1	.05280260068	1	1	0	0	0	0	0	0	0	0	0	1143.953	916.9553	1	20.6699	25.88433
175					FAA2	5	W	184540	186774	lipid metabolism*	long-chain-fatty-acid-CoA ligase activity					YER015W	YER015W||ebi.ac.uk:Database:sgd;A_06_P2638||www.chem.agilent.com:Database:agp		A_06_P2638	1080729	OLIGO	14.181666689	.188148148	68	2	1	175			1473	64	1	.08780837462	1	1	0	0	0	0	0	0	0	0	0	375.29	182.857	1	9.634056	25.33333
176					URE2	14	C	220200	219136	regulation of nitrogen utilization*	transcription corepressor activity					YNL229C	YNL229C||ebi.ac.uk:Database:sgd;A_06_P6001||www.chem.agilent.com:Database:agp		A_06_P6001	1085782	OLIGO	14.393333356	.188148148	69	2	1	176			1494	63	1	.0519315042	1	1	0	0	0	0	0	0	0	0	0	2558.358	4215.915	1	40.00845	25.67547
177					SMD3	12	C	434464	434159	nuclear mRNA splicing, via spliceosome	RNA splicing factor activity, transesterification mechanism*					YLR147C	YLR147C||ebi.ac.uk:Database:sgd;A_06_P4960||www.chem.agilent.com:Database:agp		A_06_P4960	1083319	OLIGO	14.605000023	.188148148	70	2	1	177			1515	63	1	.05424667836	1	1	0	0	0	0	0	0	0	0	0	760.4606	892.6773	1	17.18647	25.78571
178					PMA1	7	C	482671	479915	regulation of pH*	hydrogen-exporting ATPase activity, phosphorylative mechanism					YGL008C	YGL008C||ebi.ac.uk:Database:sgd;A_06_P2963||www.chem.agilent.com:Database:agp		A_06_P2963	1083142	OLIGO	14.81666669	.188148148	71	2	1	178			1536	63	1	.05081444	1	1	0	0	0	0	0	0	0	0	1	82000.84	54523.91	1	953.5872	25.73359
179					FAR7	6	W	160529	161194	cell cycle arrest in response to pheromone	molecular function unknown					YFR008W	YFR008W||ebi.ac.uk:Database:sgd;A_06_P2902||www.chem.agilent.com:Database:agp		A_06_P2902	1082993	OLIGO	15.028333357	.188148148	72	2	1	179			1557	63	1	.07723888542	1	1	0	0	0	0	0	0	0	0	1	319.0256	301.9599	1	9.588116	25.96226
180					RPS7A	15	W	505794	506767	protein biosynthesis	structural constituent of ribosome					YOR096W	YOR096W||ebi.ac.uk:Database:sgd;A_06_P6458||www.chem.agilent.com:Database:agp		A_06_P6458	1081668	OLIGO	15.240000024	.188148148	73	2	1	180			1578	63	1	.04916122243	1	1	0	0	0	0	0	0	0	0	1	13248.53	12928.9	1	84.62189	25.76692
181						4	C	835487	832854	biological process unknown	molecular function unknown					YDR186C	YDR186C||ebi.ac.uk:Database:sgd;A_06_P2175||www.chem.agilent.com:Database:agp		A_06_P2175	1083411	OLIGO	15.451666691	.188148148	74	2	1	181			1599	63	1	.05027002081	1	1	0	0	0	0	0	0	0	0	1	1719.501	1782.703	1	29.67464	25.96169
182					GRX4	5	C	539163	538429	response to oxidative stress	thiol-disulfide exchange intermediate activity					YER174C	YER174C||ebi.ac.uk:Database:sgd;A_06_P2806||www.chem.agilent.com:Database:agp		A_06_P2806	1085486	OLIGO	15.663333358	.188148148	75	2	1	182			1620	63	1	.05218734238	1	1	0	0	0	0	0	0	0	0	0	1050.631	1380.236	1	15.42291	25.82117
183					RRM3	8	C	172962	170791	mitochondrial genome maintenance*	DNA helicase activity*					YHR031C	YHR031C||ebi.ac.uk:Database:sgd;A_06_P3602||www.chem.agilent.com:Database:agp		A_06_P3602	1083539	OLIGO	15.875000025	.188148148	76	2	1	183			1642	63	1	.06092677798	1	1	0	0	0	0	0	0	0	0	0	645.2441	449.4867	1	14.72175	25.90741
184					ECM21	2	C	28299	24946	cell wall organization and biogenesis	molecular function unknown					YBL101C	YBL101C||ebi.ac.uk:Database:sgd;A_06_P1234||www.chem.agilent.com:Database:agp		A_06_P1234	1083878	OLIGO	16.086666692	.188148148	77	2	1	184			1663	63	1	.05122449976	1	1	0	0	0	0	0	0	0	0	1	1415.764	1246.742	1	24.41582	25.78519
185					MDH1	11	W	278768	279772	tricarboxylic acid cycle*	L-malate dehydrogenase activity					YKL085W	YKL085W||ebi.ac.uk:Database:sgd;A_06_P4495||www.chem.agilent.com:Database:agp		A_06_P4495	1086544	OLIGO	16.298333359	.188148148	78	2	1	185			1684	63	1	.05110581974	1	1	0	0	0	0	0	0	0	0	1	19407	30197.02	1	222.6139	26.04528
186						10	W	71365	72573	biological process unknown	molecular function unknown					YJL193W	YJL193W||ebi.ac.uk:Database:sgd;A_06_P4215||www.chem.agilent.com:Database:agp		A_06_P4215	1081155	OLIGO	16.510000026	.188148148	79	2	1	186			1705	62	1	.05814582878	1	1	0	0	0	0	0	0	0	0	0	982.1139	546.2611	1	17.80493	25.98473
187						12	W	958424	962731	biological process unknown	helicase activity					YLR419W	YLR419W||ebi.ac.uk:Database:sgd;A_06_P5237||www.chem.agilent.com:Database:agp		A_06_P5237	1082523	OLIGO	16.721666693	.188148148	80	2	1	187			1727	63	1	.05672812742	1	1	0	0	0	0	0	0	0	0	1	654.6229	649.8288	1	15.33264	26
188					RPS29B	4	C	340798	340628	protein biosynthesis	structural constituent of ribosome					YDL061C	YDL061C||ebi.ac.uk:Database:sgd;A_06_P1790||www.chem.agilent.com:Database:agp		A_06_P1790	1081582	OLIGO	16.93333336	.188148148	81	2	1	188			1747	63	1	.04916780273	1	1	0	0	0	0	0	0	0	0	1	14169.89	13637.74	1	167.829	25.45714
189					SLX8	5	C	396168	395344	DNA recombination	DNA binding					YER116C	YER116C||ebi.ac.uk:Database:sgd;A_06_P2748||www.chem.agilent.com:Database:agp		A_06_P2748	1086059	OLIGO	17.145000027	.188148148	82	2	1	189			1768	63	1	.06101047508	1	1	0	0	0	0	0	0	0	0	1	490.4576	535.8656	1	15.35211	25.46545
190					TAN1	7	W	62075	63002	tRNA modification	RNA binding					YGL232W	YGL232W||ebi.ac.uk:Database:sgd;A_06_P3188||www.chem.agilent.com:Database:agp		A_06_P3188	1084288	OLIGO	17.356666694	.188148148	83	2	1	190			1790	63	1	.05137661657	1	1	0	0	0	0	0	0	0	0	0	1420.617	1207.844	1	23.73786	25.64945
191						14	W	498537	498683							YNL067W-A	YNL067W-A||ebi.ac.uk:Database:sgd;A_06_P5838||www.chem.agilent.com:Database:agp		A_06_P5838	1085999	OLIGO	17.568333361	.188148148	84	2	1	191			1811	63	1	.4596241757	1	1	0	0	0	0	0	0	0	0	1	49.0964	32.93417	1	7.047361	25.50746
192					LPE10	16	W	434520	435761	mitochondrial magnesium ion transport	magnesium ion transporter activity					YPL060W	YPL060W||ebi.ac.uk:Database:sgd;A_06_P6819||www.chem.agilent.com:Database:agp		A_06_P6819	1084290	OLIGO	17.780000028	.188148148	85	2	1	192			1832	63	1	.117169973	1	1	0	0	0	0	0	0	0	0	1	198.6064	152.2264	1	8.521195	25.03802
193					BDH1	1	W	35156	36304	butanediol fermentation	(R,R)-butanediol dehydrogenase activity					YAL060W	YAL060W||ebi.ac.uk:Database:sgd;A_06_P1084||www.chem.agilent.com:Database:agp		A_06_P1084	1081570	OLIGO	17.991666695	.188148148	86	2	1	193			1853	63	1	.05067959504	1	1	0	0	0	0	0	0	0	0	1	11541.69	17030.4	1	154.3496	24.66667
194						6	W	156139	157746	biological process unknown	X-Pro aminopeptidase activity					YFR006W	YFR006W||ebi.ac.uk:Database:sgd;A_06_P2900||www.chem.agilent.com:Database:agp		A_06_P2900	1083238	OLIGO	18.203333362	.188148148	87	2	1	194			1874	63	1	.05022639806	1	1	0	0	0	0	0	0	0	0	0	3517.249	4727.523	1	61.64422	25.05515
195					PAC2	5	W	164526	166082	post-chaperonin tubulin folding pathway*	alpha-tubulin binding					YER007W	YER007W||ebi.ac.uk:Database:sgd;A_06_P2629||www.chem.agilent.com:Database:agp		A_06_P2629	1080894	OLIGO	18.415000029	.188148148	88	2	1	195			1895	63	1	.07140743922	1	1	0	0	0	0	0	0	0	0	1	337.0797	379.3754	1	11.801	25.37282
196					SRB5	7	C	698372	697449	transcription from RNA polymerase II promoter	RNA polymerase II transcription mediator activity					YGR104C	YGR104C||ebi.ac.uk:Database:sgd;A_06_P3324||www.chem.agilent.com:Database:agp		A_06_P3324	1080958	OLIGO	18.626666696	.188148148	89	2	1	196			1917	63	1	.05572821449	1	1	0	0	0	0	0	0	0	0	1	728.1895	682.9919	1	14.83141	25.21505
197					ARR4	4	C	283176	282112	response to heat*	ATPase activity					YDL100C	YDL100C||ebi.ac.uk:Database:sgd;A_06_P1830||www.chem.agilent.com:Database:agp		A_06_P1830	1085772	OLIGO	18.838333363	.188148148	90	2	1	197			1938	64	1	.0492778202	1	1	0	0	0	0	0	0	0	0	1	5681.338	6057.855	1	71.22046	25.32852
198					PMT4	10	C	700529	698241	protein amino acid O-linked glycosylation	dolichyl-phosphate-mannose-protein mannosyltransferase activity					YJR143C	YJR143C||ebi.ac.uk:Database:sgd;A_06_P4387||www.chem.agilent.com:Database:agp		A_06_P4387	1084411	OLIGO	19.05000003	.188148148	91	2	1	198			1959	63	1	.05170465636	1	1	0	0	0	0	0	0	0	0	1	10376.64	6281.955	1	161.3368	25.51698
199					ASF1	10	W	196206	197045	DNA damage response, signal transduction resulting in induction of apoptosis	transcription regulator activity*					YJL115W	YJL115W||ebi.ac.uk:Database:sgd;A_06_P4135||www.chem.agilent.com:Database:agp		A_06_P4135	1085699	OLIGO	19.261666697	.188148148	92	2	1	199			1980	64	1	.09892947362	1	1	0	0	0	0	0	0	0	0	1	248.1571	187.6759	1	9.323281	25.56716
200						8	C	367894	365342	biological process unknown	molecular function unknown					YHR131C	YHR131C||ebi.ac.uk:Database:sgd;A_06_P3706||www.chem.agilent.com:Database:agp		A_06_P3706	1081367	OLIGO	19.473333364	.188148148	93	2	1	200			2001	63	1	.0575621116	1	1	0	0	0	0	0	0	0	0	0	756.662	557.1262	1	21.19532	25.5
201					RER2	2	C	242570	241710	ER to Golgi transport*	prenyltransferase activity*					YBR002C	YBR002C||ebi.ac.uk:Database:sgd;A_06_P1249||www.chem.agilent.com:Database:agp		A_06_P1249	1086603	OLIGO	19.685000031	.188148148	94	2	1	201			2023	64	1	.06091620813	1	1	0	0	0	0	0	0	0	0	1	546.6067	486.9781	1	11.7445	25.0856
202					BUD20	12	C	282457	281957	bud site selection	molecular function unknown					YLR074C	YLR074C||ebi.ac.uk:Database:sgd;A_06_P4886||www.chem.agilent.com:Database:agp		A_06_P4886	1085585	OLIGO	19.896666698	.188148148	95	2	1	202			2044	63	1	.05097382484	1	1	0	0	0	0	0	0	0	0	0	1640.279	2214.322	1	25.17006	25.04906
203					CTF18	13	C	424727	422502	mitotic sister chromatid cohesion	molecular function unknown					YMR078C	YMR078C||ebi.ac.uk:Database:sgd;A_06_P5506||www.chem.agilent.com:Database:agp		A_06_P5506	1085285	OLIGO	20.108333365	.188148148	96	2	1	203			2065	63	1	.07029763331	1	1	0	0	0	0	0	0	0	0	0	428.5369	323.762	1	10.80053	25.47273
204						15	C	65349	61324	biological process unknown	molecular function unknown					YOL138C	YOL138C||ebi.ac.uk:Database:sgd;A_06_P6331||www.chem.agilent.com:Database:agp		A_06_P6331	1083612	OLIGO	20.320000032	.188148148	97	2	1	204			2086	62	1	.0553231865	1	1	0	0	0	0	0	0	0	0	1	727.8872	726.704	1	17.06608	25.0566
205						13	C	923800	923492							YMR326C	YMR326C||ebi.ac.uk:Database:sgd;A_06_P5771||www.chem.agilent.com:Database:agp		A_06_P5771	1084800	OLIGO	20.531666699	.188148148	98	2	1	205			2107	63	1	.5621753234	1	1	0	0	0	0	0	0	0	0	0	30.9781	35.14916	1	6.062462	24.94465
206					BLM3	6	W	123474	129905	protein catabolism*	proteasome activator activity					YFL007W	YFL007W||ebi.ac.uk:Database:sgd;A_06_P2830||www.chem.agilent.com:Database:agp		A_06_P2830	1082027	OLIGO	20.743333366	.188148148	99	2	1	206			2128	62	1	.08294823412	1	1	0	0	0	0	0	0	0	0	1	280.449	273.0188	1	10.28782	25.13504
207					ADH6	13	C	912141	911059	aldehyde metabolism*	alcohol dehydrogenase (NADP+) activity					YMR318C	YMR318C||ebi.ac.uk:Database:sgd;A_06_P5763||www.chem.agilent.com:Database:agp		A_06_P5763	1082463	OLIGO	20.955000033	.188148148	100	2	1	207			2150	64	1	.05076968104	1	1	0	0	0	0	0	0	0	0	1	4460.591	6576.359	1	55.258	25.05882
208					PHO87	3	C	197180	194409	phosphate transport	inorganic phosphate transporter activity					YCR037C	YCR037C||ebi.ac.uk:Database:sgd;A_06_P1662||www.chem.agilent.com:Database:agp		A_06_P1662	1083332	OLIGO	21.1666667	.188148148	101	2	1	208			2170	63	1	.0516798181	1	1	0	0	0	0	0	0	0	0	0	1407.559	1140.839	1	30.43378	25.12774
209					NDL1	12	C	644975	644406	nuclear migration, microtubule-mediated	molecular function unknown					YLR254C	YLR254C||ebi.ac.uk:Database:sgd;A_06_P5068||www.chem.agilent.com:Database:agp		A_06_P5068	1081347	OLIGO	21.378333367	.188148148	102	2	1	209			2191	64	1	.06220044413	1	1	0	0	0	0	0	0	0	0	1	533.4261	448.8225	1	12.49949	25.50554
210					MCH4	15	C	96360	94855	transport	transporter activity*					YOL119C	YOL119C||ebi.ac.uk:Database:sgd;A_06_P6312||www.chem.agilent.com:Database:agp		A_06_P6312	1086646	OLIGO	21.590000034	.188148148	103	2	1	210			2213	62	1	.05553558268	1	1	0	0	0	0	0	0	0	0	0	978.1901	1976.724	1	16.36962	25.37262
211					LSM2	2	W	170626	171041	nuclear mRNA splicing, via spliceosome*	RNA binding					YBL026W	YBL026W||ebi.ac.uk:Database:sgd;A_06_P1155||www.chem.agilent.com:Database:agp		A_06_P1155	1084305	OLIGO	21.801666701	.188148148	104	2	1	211			2234	64	1	.06318517975	1	1	0	0	0	0	0	0	0	0	1	447.0019	486.6624	1	13.18978	25.67399
212																	(-)3xSLv1||AgilentControlDB;NegativeControl||AgilentControlDB		(-)3XSLV1	1080867	CONTROL	22.013333368	.188148148	105	2	1	212			2255	64	1	.5155209849	1	1	0	0	0	0	0	0	0	0	0	25.49281	49.21613	1	4.342929	24.94186
213																	(-)3xSLv1||AgilentControlDB;NegativeControl||AgilentControlDB		(-)3XSLV1	1080867	CONTROL	22.225000035	.188148148	106	2	1	213			2277	64	1	.4384808046	1	1	0	0	0	0	0	0	0	0	0	38.53968	46.60094	1	5.935669	24.81579
214																	(-)3xSLv1||AgilentControlDB;NegativeControl||AgilentControlDB		(-)3XSLV1	1080867	CONTROL	22.436666702	.188148148	107	2	1	214			2297	63	1	.3653904899	1	1	0	0	0	1	0	0	0	0	0	73.11333	34.15316	1	7.830507	24.02817
215						13	W	325876	327288	biological process unknown	molecular function unknown					YMR027W	YMR027W||ebi.ac.uk:Database:sgd;A_06_P5455||www.chem.agilent.com:Database:agp		A_06_P5455	1081217	OLIGO	0	.376296296	1	3	1	215			54	81	1	.049996046	1	1	0	0	0	0	0	0	0	0	1	9522.518	7178.207	1	140.1336	25.26154
216					PRM9	1	W	186830	187726	vesicle organization and biogenesis	molecular function unknown					YAR031W	YAR031W||ebi.ac.uk:Database:sgd;A_06_P1111||www.chem.agilent.com:Database:agp		A_06_P1111	1081485	OLIGO	.211666667	.376296296	2	3	1	216			75	81	1	.5329626111	1	1	0	0	0	0	0	0	0	0	0	37.4141	32.39651	1	4.867456	26.74638
217						2	W	513038	513577	biological process unknown	molecular function unknown					YBR137W	YBR137W||ebi.ac.uk:Database:sgd;A_06_P1389||www.chem.agilent.com:Database:agp		A_06_P1389	1086645	OLIGO	.423333334	.376296296	3	3	1	217			97	80	1	.05244247813	1	1	0	0	0	0	0	0	0	0	1	1032.444	990.645	1	19.93375	26.62406
218					RPS22A	10	C	75301	74909	protein biosynthesis	structural constituent of ribosome					YJL190C	YJL190C||ebi.ac.uk:Database:sgd;A_06_P4212||www.chem.agilent.com:Database:agp		A_06_P4212	1082954	OLIGO	.635000001	.376296296	4	3	1	218			118	82	1	.04932473254	1	1	0	0	0	0	0	0	0	0	1	34981.8	30559.23	1	421.7569	26.26894
219					CEP3	13	C	599157	597331	mitotic spindle checkpoint	DNA bending activity*					YMR168C	YMR168C||ebi.ac.uk:Database:sgd;A_06_P5603||www.chem.agilent.com:Database:agp		A_06_P5603	1085607	OLIGO	.846666668	.376296296	5	3	1	219			139	81	1	.1384753771	1	1	0	0	0	0	0	0	0	0	1	145.6132	140.0932	1	9.764128	25.92537
220					TRL1	10	C	272401	269918	tRNA splicing*	RNA ligase (ATP) activity					YJL087C	YJL087C||ebi.ac.uk:Database:sgd;A_06_P4109||www.chem.agilent.com:Database:agp		A_06_P4109	1085564	OLIGO	1.058333335	.376296296	6	3	1	220			160	81	1	.06206842006	1	1	0	0	0	0	0	0	0	0	1	525.9483	457.5089	1	13.67717	26.1553
221						16	C	828136	826829	biological process unknown	molecular function unknown					YPR148C	YPR148C||ebi.ac.uk:Database:sgd;A_06_P7196||www.chem.agilent.com:Database:agp		A_06_P7196	1082544	OLIGO	1.270000002	.376296296	7	3	1	221			181	81	1	.05001022236	1	1	0	0	0	0	0	0	0	0	1	3336.565	4285.011	1	50.88879	26.39925
222					SNO1	13	C	457958	457284	pyridoxine metabolism*	molecular function unknown					YMR095C	YMR095C||ebi.ac.uk:Database:sgd;A_06_P5524||www.chem.agilent.com:Database:agp		A_06_P5524	1082483	OLIGO	1.481666669	.376296296	8	3	1	222			203	82	1	.1131542468	1	1	0	0	0	0	0	0	0	0	0	79.79338	463.373	1	6.487418	26.17778
223						15	C	968469	968143							YOR343C	YOR343C||ebi.ac.uk:Database:sgd;A_06_P6707||www.chem.agilent.com:Database:agp		A_06_P6707	1083407	OLIGO	1.693333336	.376296296	9	3	1	223			224	81	1	.072560719	1	1	0	0	0	0	0	0	0	0	1	332.0751	361.9084	1	13.4489	26.43173
224					MMS1	16	W	870699	874922	DNA repair*	molecular function unknown					YPR164W	YPR164W||ebi.ac.uk:Database:sgd;A_06_P7212||www.chem.agilent.com:Database:agp		A_06_P7212	1086074	OLIGO	1.905000003	.376296296	10	3	1	224			245	82	1	.05676726854	1	1	0	0	0	0	0	0	0	0	0	744.6871	600.5003	1	17.83942	26.61509
225					TAF12	4	W	746733	748352	transcription initiation from RNA polymerase II promoter*	general RNA polymerase II transcription factor activity					YDR145W	YDR145W||ebi.ac.uk:Database:sgd;A_06_P2133||www.chem.agilent.com:Database:agp		A_06_P2133	1082184	OLIGO	2.11666667	.376296296	11	3	1	225			266	81	1	.05345298023	1	1	0	0	0	0	0	0	0	0	0	1114.521	840.2936	1	20.68183	26.50714
226					KTI12	11	C	229526	228585	carbon utilization	enzyme regulator activity					YKL110C	YKL110C||ebi.ac.uk:Database:sgd;A_06_P4522||www.chem.agilent.com:Database:agp		A_06_P4522	1084633	OLIGO	2.328333337	.376296296	12	3	1	226			287	81	1	.05701204405	1	1	0	0	0	0	0	0	0	0	0	584.8144	754.3345	1	11.8722	26.46545
227																	(+)E1A_r60_a104||AgilentControlDB;E1A_r60_a104||AgilentControlDB		(+)E1A_R60_A104	1545260	CONTROL	2.540000004	.376296296	13	3	1	227			309	81	1	.5373024033	1	1	0	0	0	0	0	0	0	0	0	38.45086	30.94626	1	6.59849	26.78598
228					CAF4	11	C	510323	508344	regulation of transcription, DNA-dependent	protein binding					YKR036C	YKR036C||ebi.ac.uk:Database:sgd;A_06_P4674||www.chem.agilent.com:Database:agp		A_06_P4674	1082707	OLIGO	2.751666671	.376296296	14	3	1	228			329	81	1	.05709863289	1	1	0	0	0	0	0	0	0	0	0	591.477	709.2513	1	13.52491	26.10345
229					TPN1	7	C	152782	151043	vitamin transport	vitamin transporter activity					YGL186C	YGL186C||ebi.ac.uk:Database:sgd;A_06_P3141||www.chem.agilent.com:Database:agp		A_06_P3141	1085456	OLIGO	2.963333338	.376296296	15	3	1	229			350	81	1	.05096893729	1	1	0	0	0	0	0	0	0	0	1	10385.27	6814.891	1	143.5768	26.39852
230					COX6	8	W	209698	210144	aerobic respiration*	cytochrome-c oxidase activity					YHR051W	YHR051W||ebi.ac.uk:Database:sgd;A_06_P3624||www.chem.agilent.com:Database:agp		A_06_P3624	1086825	OLIGO	3.175000005	.376296296	16	3	1	230			372	81	1	.04984517145	1	1	0	0	0	0	0	0	0	0	1	3884.541	4879.645	1	58.02852	26.61624
231					VMA7	7	C	527333	526977	vacuolar acidification	hydrogen-transporting ATPase activity, rotational mechanism					YGR020C	YGR020C||ebi.ac.uk:Database:sgd;A_06_P3240||www.chem.agilent.com:Database:agp		A_06_P3240	1085775	OLIGO	3.386666672	.376296296	17	3	1	231			393	81	1	.05170542491	1	1	0	0	0	0	0	0	0	0	1	1116.148	1215.162	1	21.73937	26.41026
232					QCR6	6	C	224757	224314	aerobic respiration*	ubiquinol-cytochrome-c reductase activity					YFR033C	YFR033C||ebi.ac.uk:Database:sgd;A_06_P2931||www.chem.agilent.com:Database:agp		A_06_P2931	1083147	OLIGO	3.598333339	.376296296	18	3	1	232			414	82	1	.0495127702	1	1	0	0	0	0	0	0	0	0	1	19771.51	23923.48	1	234.6205	26.37879
233					MIA40	11	W	75826	77037	protein targeting*	molecular function unknown					YKL195W	YKL195W||ebi.ac.uk:Database:sgd;A_06_P4608||www.chem.agilent.com:Database:agp		A_06_P4608	1080881	OLIGO	3.810000006	.376296296	19	3	1	233			435	81	1	.04988517769	1	1	0	0	0	0	0	0	0	0	1	2258.033	2132.276	1	31.59119	26.27341
234					ISA2	16	W	682217	682774	iron ion transport	molecular function unknown					YPR067W	YPR067W||ebi.ac.uk:Database:sgd;A_06_P7113||www.chem.agilent.com:Database:agp		A_06_P7113	1085376	OLIGO	4.021666673	.376296296	20	3	1	234			457	82	1	.05497277224	1	1	0	0	0	0	0	0	0	0	1	742.0046	758.8055	1	13.27918	26.02024
235					NUP84	4	W	251566	253746	mRNA-nucleus export*	structural molecule activity					YDL116W	YDL116W||ebi.ac.uk:Database:sgd;A_06_P1847||www.chem.agilent.com:Database:agp		A_06_P1847	1086726	OLIGO	4.23333334	.376296296	21	3	1	235			477	81	1	.05267185964	1	1	0	0	0	0	0	0	0	0	0	1225.656	946.8062	1	21.36498	26.25292
236					RTT101	10	C	352024	349496	ubiquitin-dependent protein catabolism*	protein binding*					YJL047C	YJL047C||ebi.ac.uk:Database:sgd;A_06_P4067||www.chem.agilent.com:Database:agp		A_06_P4067	1081999	OLIGO	4.445000007	.376296296	22	3	1	236			498	82	1	.0531721951	1	1	0	0	0	0	0	0	0	0	1	906.6523	913.1544	1	15.13284	26.1811
237						2	C	206952	206110	biological process unknown	molecular function unknown					YBL010C	YBL010C||ebi.ac.uk:Database:sgd;A_06_P1139||www.chem.agilent.com:Database:agp		A_06_P1139	1081860	OLIGO	4.656666674	.376296296	23	3	1	237			520	81	1	.05806935737	1	1	0	0	0	0	0	0	0	0	0	752.5726	535.1815	1	13.80132	25.96617
238						5	W	566225	566650	biological process unknown	molecular function unknown					YER187W	YER187W||ebi.ac.uk:Database:sgd;A_06_P2819||www.chem.agilent.com:Database:agp		A_06_P2819	1083305	OLIGO	4.868333341	.376296296	24	3	1	238			541	82	1	.1365585812	1	1	0	0	0	0	0	0	0	0	1	159.3184	132.106	1	7.634407	25.74532
239					SPO74	7	C	185400	184159	sporulation (sensu Fungi)	structural molecule activity					YGL170C	YGL170C||ebi.ac.uk:Database:sgd;A_06_P3125||www.chem.agilent.com:Database:agp		A_06_P3125	1084393	OLIGO	5.080000008	.376296296	25	3	1	239			563	81	1	.4632218999	1	1	0	0	0	0	0	0	0	0	0	36.79708	43.69713	1	5.010768	25.19853
241						2	C	259564	259145							YBR012C	YBR012C||ebi.ac.uk:Database:sgd;A_06_P1259||www.chem.agilent.com:Database:agp		A_06_P1259	1084609	OLIGO	5.503333342	.376296296	27	3	1	241			605	81	1	.09146684055	1	1	0	0	0	0	0	0	0	0	0	175.0941	342.1716	1	7.61955	25.75636
242					LIP2	12	C	617320	616334	protein-lipoylation	ligase activity					YLR239C	YLR239C||ebi.ac.uk:Database:sgd;A_06_P5053||www.chem.agilent.com:Database:agp		A_06_P5053	1086291	OLIGO	5.715000009	.376296296	28	3	1	242			626	82	1	.05284675643	1	1	0	0	0	0	0	0	0	0	0	924.742	1220.538	1	20.07581	26.00727
243					PIM1	2	C	181278	177877	proteolysis and peptidolysis*	ATP-dependent peptidase activity					YBL022C	YBL022C||ebi.ac.uk:Database:sgd;A_06_P1151||www.chem.agilent.com:Database:agp		A_06_P1151	1082290	OLIGO	5.926666676	.376296296	29	3	1	243			647	81	1	.04935216665	1	1	0	0	0	0	0	0	0	0	1	8613.197	7587.294	1	145.9012	25.663
244					CDC8	10	W	543976	544626	DNA repair*	thymidylate kinase activity*					YJR057W	YJR057W||ebi.ac.uk:Database:sgd;A_06_P4300||www.chem.agilent.com:Database:agp		A_06_P4300	1085579	OLIGO	6.138333343	.376296296	30	3	1	244			668	82	1	.05507799481	1	1	0	0	0	0	0	0	0	0	0	689.8489	888.4988	1	18.01883	25.67547
245						4	W	501096	501410							YDR029W	YDR029W||ebi.ac.uk:Database:sgd;A_06_P2014||www.chem.agilent.com:Database:agp		A_06_P2014	1081137	OLIGO	6.35000001	.376296296	31	3	1	245			689	81	1	.149688044	1	1	0	0	0	0	0	0	0	0	0	189.8977	88.41912	1	6.903964	26.12313
246					BAT2	10	W	705659	706789	branched chain family amino acid biosynthesis*	branched-chain-amino-acid transaminase activity					YJR148W	YJR148W||ebi.ac.uk:Database:sgd;A_06_P4392||www.chem.agilent.com:Database:agp		A_06_P4392	1086762	OLIGO	6.561666677	.376296296	32	3	1	246			710	82	1	.06665859418	1	1	0	0	0	0	0	0	0	0	0	2037.709	8275.868	1	34.3024	26.85338
247					BUR6	5	C	491953	491525	negative regulation of transcription from RNA polymerase II promoter	transcription corepressor activity					YER159C	YER159C||ebi.ac.uk:Database:sgd;A_06_P2792||www.chem.agilent.com:Database:agp		A_06_P2792	1086894	OLIGO	6.773333344	.376296296	33	3	1	247			732	80	1	.04979599891	1	1	0	0	0	0	0	0	0	0	1	3649.682	4505.884	1	64.88498	26.90943
248					SSH1	2	C	770411	768939	cotranslational protein-membrane targeting	protein transporter activity					YBR283C	YBR283C||ebi.ac.uk:Database:sgd;A_06_P1537||www.chem.agilent.com:Database:agp		A_06_P1537	1084124	OLIGO	6.985000011	.376296296	34	3	1	248			753	82	1	.05031450179	1	1	0	0	0	0	0	0	0	0	1	12994.34	9274.9	1	157.0828	27.47464
249						5	C	473983	472652	biological process unknown	molecular function unknown					YER152C	YER152C||ebi.ac.uk:Database:sgd;A_06_P2785||www.chem.agilent.com:Database:agp		A_06_P2785	1080883	OLIGO	7.196666678	.376296296	35	3	1	249			774	81	1	.0493733074	1	1	0	0	0	0	0	0	0	0	1	6045.028	5395	1	97.65707	27.20789
250					PRE5	13	W	901708	902412	ubiquitin-dependent protein catabolism	endopeptidase activity					YMR314W	YMR314W||ebi.ac.uk:Database:sgd;A_06_P5757||www.chem.agilent.com:Database:agp		A_06_P5757	1084508	OLIGO	7.408333345	.376296296	36	3	1	250			795	81	1	.04954305903	1	1	0	0	0	0	0	0	0	0	1	7720.546	9316.904	1	107.9341	26.9283
251					RNH70	7	C	1045486	1043825	DNA replication*	3'-5' exonuclease activity					YGR276C	YGR276C||ebi.ac.uk:Database:sgd;A_06_P3498||www.chem.agilent.com:Database:agp		A_06_P3498	1086181	OLIGO	7.620000012	.376296296	37	3	1	251			816	81	1	.05300024137	1	1	0	0	0	0	0	0	0	0	1	930.8283	930.4567	1	17.48058	26.90943
252					TOR2	11	C	63360	55936	endocytosis*	protein binding*					YKL203C	YKL203C||ebi.ac.uk:Database:sgd;A_06_P4615||www.chem.agilent.com:Database:agp		A_06_P4615	1086401	OLIGO	7.831666679	.376296296	38	3	1	252			838	81	1	.05046443476	1	1	0	0	0	0	0	0	0	0	0	3086.098	2308.796	1	51.69557	27.04869
253																	(+)E1A_r60_a104||AgilentControlDB;E1A_r60_a104||AgilentControlDB		(+)E1A_R60_A104	1545260	CONTROL	8.043333346	.376296296	39	3	1	253			859	80	1	.5092819655	1	1	0	0	0	0	0	0	0	0	0	39.79065	33.36036	1	7.837866	27.29348
254						7	C	695139	694588	biological process unknown	molecular function unknown					YGR102C	YGR102C||ebi.ac.uk:Database:sgd;A_06_P3322||www.chem.agilent.com:Database:agp		A_06_P3322	1082272	OLIGO	8.255000013	.376296296	40	3	1	254			880	82	1	.04959669255	1	1	0	0	0	0	0	0	0	0	1	2728.099	2826.539	1	49.67768	27.15476
255						14	C	678488	677199	biological process unknown	molecular function unknown					YNR029C	YNR029C||ebi.ac.uk:Database:sgd;A_06_P6140||www.chem.agilent.com:Database:agp		A_06_P6140	1084225	OLIGO	8.46666668	.376296296	41	3	1	255			900	81	1	.05096382813	1	1	0	0	0	0	0	0	0	0	1	1590.201	1357.994	1	29.95559	27.05426
256					MPS3	10	W	402813	404861	mitotic sister chromatid cohesion*	molecular function unknown					YJL019W	YJL019W||ebi.ac.uk:Database:sgd;A_06_P4041||www.chem.agilent.com:Database:agp		A_06_P4041	1082615	OLIGO	8.678333347	.376296296	42	3	1	256			922	82	1	.07175176196	1	1	0	0	0	0	0	0	0	0	0	471.3398	286.1754	1	12.71806	26.98885
257					GPX2	2	W	707523	708011	response to oxidative stress	glutathione peroxidase activity					YBR244W	YBR244W||ebi.ac.uk:Database:sgd;A_06_P1498||www.chem.agilent.com:Database:agp		A_06_P1498	1080981	OLIGO	8.890000014	.376296296	43	3	1	257			943	81	1	.05895017007	1	1	0	0	0	0	0	0	0	0	0	695.4587	507.4621	1	12.36875	26.81181
258					BAG7	15	W	578564	579793	small GTPase mediated signal transduction	signal transducer activity*					YOR134W	YOR134W||ebi.ac.uk:Database:sgd;A_06_P6496||www.chem.agilent.com:Database:agp		A_06_P6496	1086190	OLIGO	9.101666681	.376296296	44	3	1	258			964	82	1	.3957948701	1	1	0	0	0	0	0	0	0	0	1	45.58178	48.61977	1	6.993495	26.49813
259						11	C	482782	481814	nuclear mRNA splicing, via spliceosome	molecular function unknown					YKR022C	YKR022C||ebi.ac.uk:Database:sgd;A_06_P4659||www.chem.agilent.com:Database:agp		A_06_P4659	1084671	OLIGO	9.313333348	.376296296	45	3	1	259			985	81	1	.06315466034	1	1	0	0	0	0	0	0	0	0	0	560.4103	410.0323	1	11.61776	26.62816
260					FET3	13	W	388821	390731	high affinity iron ion transport*	ferroxidase activity					YMR058W	YMR058W||ebi.ac.uk:Database:sgd;A_06_P5485||www.chem.agilent.com:Database:agp		A_06_P5485	1086254	OLIGO	9.525000015	.376296296	46	3	1	260			1007	82	1	.09480853713	1	1	0	0	0	0	0	0	0	0	0	33553.75	2768.416	1	388.0106	26.99627
261					CDC21	15	C	467590	466676	DNA-dependent DNA replication*	thymidylate synthase activity					YOR074C	YOR074C||ebi.ac.uk:Database:sgd;A_06_P6436||www.chem.agilent.com:Database:agp		A_06_P6436	1086366	OLIGO	9.736666682	.376296296	47	3	1	261			1028	81	1	.04990334138	1	1	0	0	0	0	0	0	0	0	1	2101.739	2207.978	1	35.83444	26.80859
262					PNO1	15	C	606171	605347	rRNA processing*	unfolded protein binding					YOR145C	YOR145C||ebi.ac.uk:Database:sgd;A_06_P6507||www.chem.agilent.com:Database:agp		A_06_P6507	1080909	OLIGO	9.948333349	.376296296	48	3	1	262			1049	82	1	.04987322214	1	1	0	0	0	0	0	0	0	0	1	3801.658	4797.128	1	52.54743	27.13869
263					PRO2	15	C	922900	921530	proline biosynthesis	glutamate-5-semialdehyde dehydrogenase activity					YOR323C	YOR323C||ebi.ac.uk:Database:sgd;A_06_P6687||www.chem.agilent.com:Database:agp		A_06_P6687	1086042	OLIGO	10.160000016	.376296296	49	3	1	263			1070	81	1	.0512293589	1	1	0	0	0	0	0	0	0	0	1	8963.637	14111.02	1	117.2464	27.08541
264						4	C	1511449	1510844							YDR537C	YDR537C||ebi.ac.uk:Database:sgd;A_06_P2531||www.chem.agilent.com:Database:agp		A_06_P2531	1084760	OLIGO	10.371666683	.376296296	50	3	1	264			1091	82	1	.4942007488	1	1	0	0	0	0	0	0	0	0	0	29.82823	46.66028	1	4.551756	26.74444
265						2	C	62599	61199	biological process unknown	molecular function unknown					YBL086C	YBL086C||ebi.ac.uk:Database:sgd;A_06_P1218||www.chem.agilent.com:Database:agp		A_06_P1218	1081568	OLIGO	10.58333335	.376296296	51	3	1	265			1112	81	1	.05934909814	1	1	0	0	0	0	0	0	0	0	1	554.8402	556.159	1	12.81282	26.87407
266																	(+)E1A_r60_1||AgilentControlDB;E1A_r60_1||AgilentControlDB		(+)E1A_R60_1	1545263	CONTROL	10.795000017	.376296296	52	3	1	266			1133	82	1	.2590666336	1	1	0	0	0	0	0	0	0	0	0	95.74962	53.98414	1	7.555187	26.78378
267						4	C	1092506	1090428	biological process unknown	molecular function unknown					YDR314C	YDR314C||ebi.ac.uk:Database:sgd;A_06_P2303||www.chem.agilent.com:Database:agp		A_06_P2303	1081594	OLIGO	11.006666684	.376296296	53	3	1	267			1155	82	1	.09781945939	1	1	0	0	0	0	0	0	0	0	1	183.108	263.033	1	7.708548	26.36655
268					PNT1	15	W	821020	822291	inner mitochondrial membrane organization and biogenesis	molecular function unknown					YOR266W	YOR266W||ebi.ac.uk:Database:sgd;A_06_P6627||www.chem.agilent.com:Database:agp		A_06_P6627	1085779	OLIGO	11.218333351	.376296296	54	3	1	268			1176	82	1	.07564999353	1	1	0	0	0	0	0	0	0	0	1	320.8584	322.0846	1	10.06891	26.78755
269					CAF17	10	W	649691	651184	biological process unknown	molecular function unknown					YJR122W	YJR122W||ebi.ac.uk:Database:sgd;A_06_P4365||www.chem.agilent.com:Database:agp		A_06_P4365	1082473	OLIGO	11.430000018	.376296296	55	3	1	269			1197	81	1	.06148419687	1	1	0	0	0	0	0	0	0	0	1	508.0843	492.9325	1	14.13558	26.86194
270					RIO2	14	W	255352	256629	processing of 20S pre-rRNA	protein kinase activity*					YNL207W	YNL207W||ebi.ac.uk:Database:sgd;A_06_P5979||www.chem.agilent.com:Database:agp		A_06_P5979	1084423	OLIGO	11.641666685	.376296296	56	3	1	270			1218	82	1	.05182878383	1	1	0	0	0	0	0	0	0	0	0	1329.15	1930.321	1	18.29959	27.22745
271					RPS14B	10	W	73786	74610	protein biosynthesis*	structural constituent of ribosome*					YJL191W	YJL191W||ebi.ac.uk:Database:sgd;A_06_P4213||www.chem.agilent.com:Database:agp		A_06_P4213	1084047	OLIGO	11.853333352	.376296296	57	3	1	271			1240	81	1	.04989683875	1	1	0	0	0	0	0	0	0	0	1	2255.41	2118.707	1	33.45038	27.02198
272						11	C	193071	191680	biological process unknown	molecular function unknown					YKL133C	YKL133C||ebi.ac.uk:Database:sgd;A_06_P4545||www.chem.agilent.com:Database:agp		A_06_P4545	1083975	OLIGO	12.065000019	.376296296	58	3	1	272			1261	82	1	.05863579591	1	1	0	0	0	0	0	0	0	0	1	617.8676	547.6492	1	12.8897	26.67293
273					RAX1	15	W	880961	882268	bud site selection	molecular function unknown					YOR301W	YOR301W||ebi.ac.uk:Database:sgd;A_06_P6663||www.chem.agilent.com:Database:agp		A_06_P6663	1083501	OLIGO	12.276666686	.376296296	59	3	1	273			1282	81	1	.0660332519	1	1	0	0	0	0	0	0	0	0	0	524.9085	357.8413	1	9.915703	26.57244
274					OPI3	10	C	572849	572229	phosphatidylcholine biosynthesis	phosphatidyl-N-methylethanolamine N-methyltransferase activity					YJR073C	YJR073C||ebi.ac.uk:Database:sgd;A_06_P4316||www.chem.agilent.com:Database:agp		A_06_P4316	1086886	OLIGO	12.488333353	.376296296	60	3	1	274			1303	82	1	.05346224132	1	1	0	0	0	0	0	0	0	0	1	56303.21	29019.81	1	779.2143	26.81887
275					NIC96	6	W	150011	152530	mRNA-nucleus export*	structural molecule activity					YFR002W	YFR002W||ebi.ac.uk:Database:sgd;A_06_P2896||www.chem.agilent.com:Database:agp		A_06_P2896	1085672	OLIGO	12.70000002	.376296296	61	3	1	275			1324	81	1	.05063520287	1	1	0	0	0	0	0	0	0	0	1	1510.916	1511.8	1	28.51085	26.63235
276					SPC105	7	W	334889	337642	microtubule nucleation	structural constituent of cytoskeleton					YGL093W	YGL093W||ebi.ac.uk:Database:sgd;A_06_P3048||www.chem.agilent.com:Database:agp		A_06_P3048	1084733	OLIGO	12.911666687	.376296296	62	3	1	276			1345	82	1	.05174164116	1	1	0	0	0	0	0	0	0	0	0	2335.959	1549.448	1	30.03034	26.3209
277					SAM2	4	C	1454454	1453300	methionine metabolism	methionine adenosyltransferase activity					YDR502C	YDR502C||ebi.ac.uk:Database:sgd;A_06_P2495||www.chem.agilent.com:Database:agp		A_06_P2495	1081183	OLIGO	13.123333354	.376296296	63	3	1	277			1366	81	1	.05014094216	1	1	0	0	0	0	0	0	0	0	1	19212.82	14049.78	1	224.8935	26.58029
278						16	W	280479	280925	biological process unknown	molecular function unknown					YPL144W	YPL144W||ebi.ac.uk:Database:sgd;A_06_P6903||www.chem.agilent.com:Database:agp		A_06_P6903	1086576	OLIGO	13.335000021	.376296296	64	3	1	278			1388	82	1	.05501506074	1	1	0	0	0	0	0	0	0	0	0	1042.439	705.6174	1	18.08844	26.31136
279																	E1A_r60_n11||AgilentControlDB;(+)E1A_r60_n11||AgilentControlDB		(+)E1A_R60_N11	1545266	CONTROL	13.546666688	.376296296	65	3	1	279			1409	81	1	.08089220894	1	1	0	0	0	0	0	0	0	0	0	280.9851	294.8065	1	8.236438	26.20073
280						15	C	587342	586950							YOR139C	YOR139C||ebi.ac.uk:Database:sgd;A_06_P6501||www.chem.agilent.com:Database:agp		A_06_P6501	1086312	OLIGO	13.758333355	.376296296	66	3	1	280			1430	82	1	.1469124801	1	1	0	0	0	0	0	0	0	0	1	171.026	103.5066	1	7.938674	26.46774
281						12	C	1060884	1059754	biological process unknown	molecular function unknown					YLR460C	YLR460C||ebi.ac.uk:Database:sgd;A_06_P5279||www.chem.agilent.com:Database:agp		A_06_P5279	1080727	OLIGO	13.970000022	.376296296	67	3	1	281			1451	82	1	.1482422952	1	1	0	0	0	0	0	0	0	0	1	152.8575	114.0426	1	7.618325	26.75
282					MCM3	5	W	86937	89852	DNA replication initiation*	chromatin binding*					YEL032W	YEL032W||ebi.ac.uk:Database:sgd;A_06_P2573||www.chem.agilent.com:Database:agp		A_06_P2573	1086249	OLIGO	14.181666689	.376296296	68	3	1	282			1472	82	1	.04970689833	1	1	0	0	0	0	0	0	0	0	1	4229.354	3522.461	1	54.74733	26.04833
283					SCJ1	13	W	695349	696482	protein folding*	chaperone binding					YMR214W	YMR214W||ebi.ac.uk:Database:sgd;A_06_P5653||www.chem.agilent.com:Database:agp		A_06_P5653	1085638	OLIGO	14.393333356	.376296296	69	3	1	283			1493	81	1	.04937659691	1	1	0	0	0	0	0	0	0	0	1	4204.947	3969.53	1	73.2009	26.49458
284					OSH6	11	W	445024	446370	steroid biosynthesis	oxysterol binding					YKR003W	YKR003W||ebi.ac.uk:Database:sgd;A_06_P4640||www.chem.agilent.com:Database:agp		A_06_P4640	1083586	OLIGO	14.605000023	.376296296	70	3	1	284			1515	82	1	.05001340752	1	1	0	0	0	0	0	0	0	0	1	2101.305	1966.76	1	37.1278	26.43478
285					CPA2	10	C	632856	629500	arginine biosynthesis	carbamoyl-phosphate synthase (glutamine-hydrolyzing) activity					YJR109C	YJR109C||ebi.ac.uk:Database:sgd;A_06_P4352||www.chem.agilent.com:Database:agp		A_06_P4352	1081964	OLIGO	14.81666669	.376296296	71	3	1	285			1536	81	1	.0559136257	1	1	0	0	0	0	0	0	0	0	0	6128.324	14143.43	1	90.02712	26.33582
286					PEX3	4	C	1127588	1126263	peroxisome organization and biogenesis*	protein binding					YDR329C	YDR329C||ebi.ac.uk:Database:sgd;A_06_P2320||www.chem.agilent.com:Database:agp		A_06_P2320	1081340	OLIGO	15.028333357	.376296296	72	3	1	286			1557	82	1	.05227470184	1	1	0	0	0	0	0	0	0	0	1	1087.421	1006.189	1	18.6903	26.00775
287					ROD1	15	W	364368	366881	response to drug	molecular function unknown					YOR018W	YOR018W||ebi.ac.uk:Database:sgd;A_06_P6380||www.chem.agilent.com:Database:agp		A_06_P6380	1086572	OLIGO	15.240000024	.376296296	73	3	1	287			1578	81	1	.064758231	1	1	0	0	0	0	0	0	0	0	1	473.6971	409.8159	1	13.80741	25.96981
288					BRE4	4	C	42245	38868	endocytosis	molecular function unknown					YDL231C	YDL231C||ebi.ac.uk:Database:sgd;A_06_P1966||www.chem.agilent.com:Database:agp		A_06_P1966	1080877	OLIGO	15.451666691	.376296296	74	3	1	288			1599	82	1	.05312869459	1	1	0	0	0	0	0	0	0	0	0	5472.974	2944.776	1	89.50829	26.20073
289						7	C	191982	191404							YGL165C	YGL165C||ebi.ac.uk:Database:sgd;A_06_P3120||www.chem.agilent.com:Database:agp		A_06_P3120	1085954	OLIGO	15.663333358	.376296296	75	3	1	289			1620	81	1	.427869768	1	1	0	0	0	0	0	0	0	0	1	45.20204	41.85257	1	7.377016	25.97872
290					SEC65	13	C	58687	57866	protein-ER targeting*	molecular function unknown					YML105C	YML105C||ebi.ac.uk:Database:sgd;A_06_P5398||www.chem.agilent.com:Database:agp		A_06_P5398	1084074	OLIGO	15.875000025	.376296296	76	3	1	290			1641	82	1	.04958010867	1	1	0	0	0	0	0	0	0	0	1	3408.147	3065.936	1	61.79522	26.08302
291						10	C	422927	422613							YJL007C	YJL007C||ebi.ac.uk:Database:sgd;A_06_P4028||www.chem.agilent.com:Database:agp		A_06_P4028	1085119	OLIGO	16.086666692	.376296296	77	3	1	291			1663	81	1	.402527435	1	1	0	0	0	0	0	0	0	0	0	63.92029	32.34254	1	5.702485	26.2
292																	E1A_r60_a97||AgilentControlDB;(+)E1A_r60_a97||AgilentControlDB		(+)E1A_R60_A97	1545264	CONTROL	16.298333359	.376296296	78	3	1	292			1684	82	1	.509636549	1	1	0	0	0	0	0	0	0	0	0	29.36677	44.62587	1	3.906863	26.45926
293					CWP2	11	W	258898	259176	cell wall organization and biogenesis*	structural constituent of cell wall					YKL096W-A	YKL096W-A||ebi.ac.uk:Database:sgd;A_06_P4507||www.chem.agilent.com:Database:agp		A_06_P4507	1083843	OLIGO	16.510000026	.376296296	79	3	1	293			1705	81	1	.04969244091	1	1	0	0	0	0	0	0	0	0	1	20976.36	26472.01	1	259.7778	25.94909
294						10	C	219933	218770	biological process unknown	molecular function unknown					YJL107C	YJL107C||ebi.ac.uk:Database:sgd;A_06_P4129||www.chem.agilent.com:Database:agp		A_06_P4129	1086909	OLIGO	16.721666693	.376296296	80	3	1	294			1726	82	1	.2465462677	1	1	0	0	0	0	0	0	0	0	1	60.25505	95.84821	1	6.413737	25.86142
295						4	C	1520680	1519646	biological process unknown	dihydrokaempferol 4-reductase activity					YDR541C	YDR541C||ebi.ac.uk:Database:sgd;A_06_P2535||www.chem.agilent.com:Database:agp		A_06_P2535	1085553	OLIGO	16.93333336	.376296296	81	3	1	295			1747	81	1	.05991634324	1	1	0	0	0	0	0	0	0	0	0	826.2115	470.7211	1	13.18465	26.42391
296					MSY1	16	W	364949	366427	tyrosyl-tRNA aminoacylation	tyrosine-tRNA ligase activity					YPL097W	YPL097W||ebi.ac.uk:Database:sgd;A_06_P6856||www.chem.agilent.com:Database:agp		A_06_P6856	1083638	OLIGO	17.145000027	.376296296	82	3	1	296			1768	82	1	.06081218749	1	1	0	0	0	0	0	0	0	0	0	466.2228	596.9144	1	15.30919	25.80237
297						13	W	772914	774014	biological process unknown	molecular function unknown					YMR251W	YMR251W||ebi.ac.uk:Database:sgd;A_06_P5689||www.chem.agilent.com:Database:agp		A_06_P5689	1085934	OLIGO	17.356666694	.376296296	83	3	1	297			1790	81	1	.176482688	1	1	0	0	0	0	0	0	0	0	0	293.7436	33.49491	1	7.74523	26.15589
298						14	W	708523	711204	response to pheromone	protein kinase activity					YNR047W	YNR047W||ebi.ac.uk:Database:sgd;A_06_P6160||www.chem.agilent.com:Database:agp		A_06_P6160	1081329	OLIGO	17.568333361	.376296296	84	3	1	298			1811	82	1	.05616694983	1	1	0	0	0	0	0	0	0	0	0	1201.877	677.3791	1	17.09466	25.73606
299					CPR8	14	W	676177	677103	biological process unknown	peptidyl-prolyl cis-trans isomerase activity					YNR028W	YNR028W||ebi.ac.uk:Database:sgd;A_06_P6139||www.chem.agilent.com:Database:agp		A_06_P6139	1082698	OLIGO	17.780000028	.376296296	85	3	1	299			1832	82	1	.05426831356	1	1	0	0	0	0	0	0	0	0	0	1462.012	872.5782	1	29.89082	25.49275
300					ATG12	2	W	657827	658387	protein-vacuolar targeting*	molecular function unknown					YBR217W	YBR217W||ebi.ac.uk:Database:sgd;A_06_P1470||www.chem.agilent.com:Database:agp		A_06_P1470	1082235	OLIGO	17.991666695	.376296296	86	3	1	300			1853	83	1	.1014930477	1	1	0	0	0	0	0	0	0	0	1	238.6554	182.2617	1	9.506183	25.56134
301						4	W	857677	857994							YDR203W	YDR203W||ebi.ac.uk:Database:sgd;A_06_P2192||www.chem.agilent.com:Database:agp		A_06_P2192	1086282	OLIGO	18.203333362	.376296296	87	3	1	301			1874	81	1	.37151736	1	1	0	0	0	0	0	0	0	0	1	70.43275	34.44177	1	8.105364	25.33582
302						3	C	301295	300828	biological process unknown	molecular function unknown					YCR099C	YCR099C||ebi.ac.uk:Database:sgd;A_06_P1720||www.chem.agilent.com:Database:agp		A_06_P1720	1082941	OLIGO	18.415000029	.376296296	88	3	1	302			1896	83	1	.1199042578	1	1	0	0	0	0	0	0	0	0	1	196.5189	145.4617	1	10.18155	25.70107
303					FOB1	4	W	676097	677797	replicative cell aging*	ribosomal DNA (rDNA) binding					YDR110W	YDR110W||ebi.ac.uk:Database:sgd;A_06_P2098||www.chem.agilent.com:Database:agp		A_06_P2098	1083328	OLIGO	18.626666696	.376296296	89	3	1	303			1917	82	1	.05512510488	1	1	0	0	0	0	0	0	0	0	1	795.839	704.0926	1	18.77254	25.71852
304					MSF1	16	W	657526	658935	protein biosynthesis	phenylalanine-tRNA ligase activity					YPR047W	YPR047W||ebi.ac.uk:Database:sgd;A_06_P7093||www.chem.agilent.com:Database:agp		A_06_P7093	1084330	OLIGO	18.838333363	.376296296	90	3	1	304			1938	83	1	.05451963051	1	1	0	0	0	0	0	0	0	0	0	796.0954	1283.104	1	14.74256	25.32677
305																	(+)E1A_r60_3||AgilentControlDB;E1A_r60_3||AgilentControlDB		(+)E1A_R60_3	1545261	CONTROL	19.05000003	.376296296	91	3	1	305			1959	81	1	.5470545071	1	1	0	0	0	0	0	0	0	0	0	28.7428	39.73976	1	4.676249	25.47445
306					SSO1	16	W	107275	108147	vesicle fusion*	t-SNARE activity					YPL232W	YPL232W||ebi.ac.uk:Database:sgd;A_06_P6992||www.chem.agilent.com:Database:agp		A_06_P6992	1084099	OLIGO	19.261666697	.376296296	92	3	1	306			1980	82	1	.04988757119	1	1	0	0	0	0	0	0	0	0	1	3576.002	2916.203	1	53.57537	25.58909
307					CLB6	7	C	706505	705363	G1/S transition of mitotic cell cycle*	cyclin-dependent protein kinase regulator activity					YGR109C	YGR109C||ebi.ac.uk:Database:sgd;A_06_P3329||www.chem.agilent.com:Database:agp		A_06_P3329	1086692	OLIGO	19.473333364	.376296296	93	3	1	307			2001	81	1	.1477085236	1	1	0	0	0	0	0	0	0	0	1	128.8527	136.7459	1	8.053126	25.30515
308					PDC2	4	C	610077	607300	transcription from RNA polymerase II promoter*	transcription regulator activity					YDR081C	YDR081C||ebi.ac.uk:Database:sgd;A_06_P2069||www.chem.agilent.com:Database:agp		A_06_P2069	1085610	OLIGO	19.685000031	.376296296	94	3	1	308			2022	82	1	.05225144849	1	1	0	0	0	0	0	0	0	0	0	1307.393	1021.558	1	21.95367	25.28676
309					NDE1	13	C	556474	554792	ethanol fermentation*	NADH dehydrogenase activity					YMR145C	YMR145C||ebi.ac.uk:Database:sgd;A_06_P5577||www.chem.agilent.com:Database:agp		A_06_P5577	1084029	OLIGO	19.896666698	.376296296	95	3	1	309			2044	81	1	.05020158714	1	1	0	0	0	0	0	0	0	0	1	13294.24	9650.387	1	215.7777	25.71691
310						7	W	733940	735148	biological process unknown	molecular function unknown					YGR122W	YGR122W||ebi.ac.uk:Database:sgd;A_06_P3343||www.chem.agilent.com:Database:agp		A_06_P3343	1082277	OLIGO	20.108333365	.376296296	96	3	1	310			2065	82	1	.07792475802	1	1	0	0	0	0	0	0	0	0	1	332.7078	282.4075	1	10.75313	25.92593
311					BPH1	3	W	179515	186018	cell wall organization and biogenesis*	molecular function unknown					YCR032W	YCR032W||ebi.ac.uk:Database:sgd;A_06_P1657||www.chem.agilent.com:Database:agp		A_06_P1657	1083204	OLIGO	20.320000032	.376296296	97	3	1	311			2086	81	1	.04985271389	1	1	0	0	0	0	0	0	0	0	1	2212.149	2181.191	1	41.63413	25.14286
312					RAD27	11	C	225521	224373	DNA repair*	5'-flap endonuclease activity					YKL113C	YKL113C||ebi.ac.uk:Database:sgd;A_06_P4525||www.chem.agilent.com:Database:agp		A_06_P4525	1083443	OLIGO	20.531666699	.376296296	98	3	1	312			2107	82	1	.05072710209	1	1	0	0	0	0	0	0	0	0	1	1449.767	1490.356	1	25.44995	25.84674
313						12	C	612119	611796							YLR236C	YLR236C||ebi.ac.uk:Database:sgd;A_06_P5050||www.chem.agilent.com:Database:agp		A_06_P5050	1082693	OLIGO	20.743333366	.376296296	99	3	1	313			2129	82	1	.2105580514	1	1	0	0	0	0	0	0	0	0	1	78.43208	103.5229	1	7.190275	25.43103
314					ANT1	16	C	792200	791214	peroxisome organization and biogenesis*	adenine nucleotide transporter activity					YPR128C	YPR128C||ebi.ac.uk:Database:sgd;A_06_P7175||www.chem.agilent.com:Database:agp		A_06_P7175	1082955	OLIGO	20.955000033	.376296296	100	3	1	314			2150	83	1	.05402624495	1	1	0	0	0	0	0	0	0	0	0	1165.167	800.2544	1	23.99787	25.18248
315						5	W	98668	99129							YEL028W	YEL028W||ebi.ac.uk:Database:sgd;A_06_P2569||www.chem.agilent.com:Database:agp		A_06_P2569	1082253	OLIGO	21.1666667	.376296296	101	3	1	315			2170	82	1	.1780949945	1	1	0	0	0	0	0	0	0	0	1	97.67	119.2367	1	8.851996	25.55926
316						12	C	573920	573468	biological process unknown	molecular function unknown					YLR218C	YLR218C||ebi.ac.uk:Database:sgd;A_06_P5032||www.chem.agilent.com:Database:agp		A_06_P5032	1081171	OLIGO	21.378333367	.376296296	102	3	1	316			2191	82	1	.05240308098	1	1	0	0	0	0	0	0	0	0	0	979.9274	1207.902	1	21.81691	25.5471
317					SWH1	1	W	192613	196179	steroid biosynthesis	phosphatidylinositol binding					YAR042W	YAR042W||ebi.ac.uk:Database:sgd;A_06_P1114||www.chem.agilent.com:Database:agp		A_06_P1114	1081239	OLIGO	21.590000034	.376296296	103	3	1	317			2213	81	1	.5757413459	1	1	0	0	0	0	0	0	0	0	0	29.72074	34.89009	1	5.941157	25.18478
318																	E1A_r60_n11||AgilentControlDB;(+)E1A_r60_n11||AgilentControlDB		(+)E1A_R60_N11	1545266	CONTROL	21.801666701	.376296296	104	3	1	318			2234	83	1	.09060509339	1	1	0	0	0	0	0	0	0	0	0	208.4455	285.6648	1	8.069725	25.22059
319					MET16	16	C	877628	876843	methionine metabolism*	phosphoadenylyl-sulfate reductase (thioredoxin) activity					YPR167C	YPR167C||ebi.ac.uk:Database:sgd;A_06_P7215||www.chem.agilent.com:Database:agp		A_06_P7215	1086635	OLIGO	22.013333368	.376296296	105	3	1	319			2255	82	1	.05171365579	1	1	0	0	0	0	0	0	0	0	0	1491.596	2216.284	1	20.02642	25.34672
320					EPS1	9	W	345689	347794	protein retention in ER	protein disulfide isomerase activity					YIL005W	YIL005W||ebi.ac.uk:Database:sgd;A_06_P3803||www.chem.agilent.com:Database:agp		A_06_P3803	1081558	OLIGO	22.225000035	.376296296	106	3	1	320			2276	82	1	.05088395437	1	1	0	0	0	0	0	0	0	0	1	1431.058	1377.232	1	28.68131	25.05185
321						15	W	798013	798315							YOR248W	YOR248W||ebi.ac.uk:Database:sgd;A_06_P6609||www.chem.agilent.com:Database:agp		A_06_P6609	1081762	OLIGO	22.436666702	.376296296	107	3	1	321			2298	82	1	.04926445221	1	1	0	0	0	0	0	0	0	0	1	6432.915	6905.858	1	53.34743	24.60078
322					ERR3	13	W	920086	921399	biological process unknown	phosphopyruvate hydratase activity					YMR323W	YMR323W||ebi.ac.uk:Database:sgd;A_06_P5768||www.chem.agilent.com:Database:agp		A_06_P5768	1083995	OLIGO	0	.564444444	1	4	1	322			53	100	1	.2483440858	1	1	0	0	0	0	0	0	0	0	0	132.7977	39.49392	1	7.086239	25.23019
323					RPS31	12	W	498949	499407	protein biosynthesis*	structural constituent of ribosome*					YLR167W	YLR167W||ebi.ac.uk:Database:sgd;A_06_P4981||www.chem.agilent.com:Database:agp		A_06_P4981	1082161	OLIGO	.211666667	.564444444	2	4	1	323			75	100	1	.05034218294	1	1	0	0	0	0	0	0	0	0	1	77727.39	109780.8	1	812.3765	26.6337
324						2	C	767602	764966	biological process unknown	molecular function unknown					YBR281C	YBR281C||ebi.ac.uk:Database:sgd;A_06_P1535||www.chem.agilent.com:Database:agp		A_06_P1535	1080700	OLIGO	.423333334	.564444444	3	4	1	324			97	99	1	.0550878689	1	1	0	0	0	0	0	0	0	0	1	728.7234	758.0828	1	14.72631	26.73279
325																	E1A_r60_a97||AgilentControlDB;(+)E1A_r60_a97||AgilentControlDB		(+)E1A_R60_A97	1545264	CONTROL	.635000001	.564444444	4	4	1	325			118	100	1	.5228549145	1	1	0	0	0	0	0	0	0	0	0	34.08932	36.99798	1	5.725657	26.93156
326					KIN2	12	W	332591	336034	exocytosis	protein kinase activity					YLR096W	YLR096W||ebi.ac.uk:Database:sgd;A_06_P4908||www.chem.agilent.com:Database:agp		A_06_P4908	1086051	OLIGO	.846666668	.564444444	5	4	1	326			139	100	1	.05225545729	1	1	0	0	0	0	0	0	0	0	1	1035.369	1043.986	1	19.45907	26.94444
327						4	C	636522	636112							YDR095C	YDR095C||ebi.ac.uk:Database:sgd;A_06_P2083||www.chem.agilent.com:Database:agp		A_06_P2083	1086409	OLIGO	1.058333335	.564444444	6	4	1	327			160	100	1	.4869178618	1	1	0	0	0	0	0	0	0	0	1	42.5489	34.11202	1	6.534786	26.51429
328					RSC30	8	C	217835	215184	regulation of transcription, DNA-dependent	DNA binding					YHR056C	YHR056C||ebi.ac.uk:Database:sgd;A_06_P3629||www.chem.agilent.com:Database:agp		A_06_P3629	1083968	OLIGO	1.270000002	.564444444	7	4	1	328			181	100	1	.05005544443	1	1	0	0	0	0	0	0	0	0	1	2022.296	1914.444	1	40.00974	26.64925
329					PRP12	13	C	872624	870072	rRNA processing*	exonuclease activity					YMR302C	YMR302C||ebi.ac.uk:Database:sgd;A_06_P5743||www.chem.agilent.com:Database:agp		A_06_P5743	1081992	OLIGO	1.481666669	.564444444	8	4	1	329			202	100	1	.05016715529	1	1	0	0	0	0	0	0	0	0	1	1850.626	2080.719	1	27.84878	26.34173
330					FZO1	2	C	589109	586542	mitochondrion organization and biogenesis*	GTPase activity					YBR179C	YBR179C||ebi.ac.uk:Database:sgd;A_06_P1432||www.chem.agilent.com:Database:agp		A_06_P1432	1080903	OLIGO	1.693333336	.564444444	9	4	1	330			224	100	1	.05324162817	1	1	0	0	0	0	0	0	0	0	1	914.5132	890.7186	1	17.1877	26.70397
331						11	W	562189	564780	biological process unknown	molecular function unknown					YKR064W	YKR064W||ebi.ac.uk:Database:sgd;A_06_P4702||www.chem.agilent.com:Database:agp		A_06_P4702	1081342	OLIGO	1.905000003	.564444444	10	4	1	331			245	100	1	.06349127078	1	1	0	0	0	0	0	0	0	0	1	511.1414	422.0894	1	11.10461	26.6124
332					MRS11	8	C	115895	115614	mitochondrial inner membrane protein import	unfolded protein binding*					YHR005C-A	YHR005C-A||ebi.ac.uk:Database:sgd;A_06_P3575||www.chem.agilent.com:Database:agp		A_06_P3575	1084579	OLIGO	2.11666667	.564444444	11	4	1	332			266	100	1	.05165569517	1	1	0	0	0	0	0	0	0	0	0	1145.161	1406.591	1	18.9744	26.69314
333					HSP82	16	C	98625	96496	response to stress*	ATPase activity, coupled					YPL240C	YPL240C||ebi.ac.uk:Database:sgd;A_06_P7000||www.chem.agilent.com:Database:agp		A_06_P7000	1081205	OLIGO	2.328333337	.564444444	12	4	1	333			287	101	1	.04936266923	1	1	0	0	0	0	0	0	0	0	1	5714.525	6405.618	1	67.87985	26.77528
334					PYK2	15	C	986457	984937	pyruvate metabolism	pyruvate kinase activity					YOR347C	YOR347C||ebi.ac.uk:Database:sgd;A_06_P6711||www.chem.agilent.com:Database:agp		A_06_P6711	1081221	OLIGO	2.540000004	.564444444	13	4	1	334			308	100	1	.04982108796	1	1	0	0	0	0	0	0	0	0	1	4643.042	3730.043	1	35.28579	26.97026
335					RNR1	5	W	298948	301614	DNA replication	ribonucleoside-diphosphate reductase activity					YER070W	YER070W||ebi.ac.uk:Database:sgd;A_06_P2701||www.chem.agilent.com:Database:agp		A_06_P2701	1085763	OLIGO	2.751666671	.564444444	14	4	1	335			330	100	1	.0533512975	1	1	0	0	0	0	0	0	0	0	1	10703.36	5588.32	1	86.80071	26.53846
336					TIF6	16	C	593066	592329	ribosomal large subunit biogenesis*	molecular function unknown					YPR016C	YPR016C||ebi.ac.uk:Database:sgd;A_06_P7061||www.chem.agilent.com:Database:agp		A_06_P7061	1083683	OLIGO	2.963333338	.564444444	15	4	1	336			351	100	1	.05007140182	1	1	0	0	0	0	0	0	0	0	1	7079.163	5304.326	1	98.93037	26.40364
337					IPP1	2	C	257973	257110	phosphate metabolism	inorganic diphosphatase activity					YBR011C	YBR011C||ebi.ac.uk:Database:sgd;A_06_P1258||www.chem.agilent.com:Database:agp		A_06_P1258	1083751	OLIGO	3.175000005	.564444444	16	4	1	337			372	100	1	.04915497007	1	1	0	0	0	0	0	0	0	0	1	26522.75	25525.88	1	344.6059	26.63636
338																	(+)E1A_r60_3||AgilentControlDB;E1A_r60_3||AgilentControlDB		(+)E1A_R60_3	1545261	CONTROL	3.386666672	.564444444	17	4	1	338			393	100	1	.5875249547	1	1	0	0	0	0	0	0	0	0	0	30.43763	32.75927	1	5.240503	26.62121
339					PCP1	7	W	693367	694407	mitochondrion organization and biogenesis*	peptidase activity					YGR101W	YGR101W||ebi.ac.uk:Database:sgd;A_06_P3321||www.chem.agilent.com:Database:agp		A_06_P3321	1085467	OLIGO	3.598333339	.564444444	18	4	1	339			414	100	1	.04969046071	1	1	0	0	0	0	0	0	0	0	1	3170.495	2791.275	1	48.39967	26.47148
340					THG1	7	C	532600	531887	tRNA modification	tRNA guanylyltransferase activity					YGR024C	YGR024C||ebi.ac.uk:Database:sgd;A_06_P3244||www.chem.agilent.com:Database:agp		A_06_P3244	1081292	OLIGO	3.810000006	.564444444	19	4	1	340			436	99	1	.05187635121	1	1	0	0	0	0	0	0	0	0	1	1201.856	1074.935	1	19.94032	26.01887
341					YAP6	4	C	975776	974625	positive regulation of transcription from RNA polymerase II promoter	RNA polymerase II transcription factor activity					YDR259C	YDR259C||ebi.ac.uk:Database:sgd;A_06_P2248||www.chem.agilent.com:Database:agp		A_06_P2248	1083864	OLIGO	4.021666673	.564444444	20	4	1	341			457	100	1	.08269080602	1	1	0	0	0	0	0	0	0	0	0	202.2588	415.2064	1	8.333327	26.75889
342						12	C	368125	366668	biological process unknown	molecular function unknown					YLR108C	YLR108C||ebi.ac.uk:Database:sgd;A_06_P4921||www.chem.agilent.com:Database:agp		A_06_P4921	1086278	OLIGO	4.23333334	.564444444	21	4	1	342			477	100	1	.05364348947	1	1	0	0	0	0	0	0	0	0	0	1332.685	2422.643	1	19.42362	26.87218
343						5	C	65167	64709	biological process unknown	molecular function unknown					YEL048C	YEL048C||ebi.ac.uk:Database:sgd;A_06_P2589||www.chem.agilent.com:Database:agp		A_06_P2589	1085064	OLIGO	4.445000007	.564444444	22	4	1	343			498	100	1	.1477974898	1	1	0	0	0	0	0	0	0	0	1	132.3375	132.9797	1	8.277059	26.77985
344					DBP9	12	C	696832	695048	35S primary transcript processing*	ATP-dependent RNA helicase activity					YLR276C	YLR276C||ebi.ac.uk:Database:sgd;A_06_P5091||www.chem.agilent.com:Database:agp		A_06_P5091	1084439	OLIGO	4.656666674	.564444444	23	4	1	344			520	99	1	.0505875929	1	1	0	0	0	0	0	0	0	0	0	2006.211	2665.921	1	34.81359	26.56226
345					FOL3	13	W	494998	496281	folic acid and derivative biosynthesis	dihydrofolate synthase activity					YMR113W	YMR113W||ebi.ac.uk:Database:sgd;A_06_P5542||www.chem.agilent.com:Database:agp		A_06_P5542	1085641	OLIGO	4.868333341	.564444444	24	4	1	345			541	101	1	.0514558107	1	1	0	0	0	0	0	0	0	0	0	1453.256	2052.218	1	22.41494	26.13919
346					RPA14	4	W	769520	769933	transcription from RNA polymerase I promoter	DNA-directed RNA polymerase activity					YDR156W	YDR156W||ebi.ac.uk:Database:sgd;A_06_P2144||www.chem.agilent.com:Database:agp		A_06_P2144	1080899	OLIGO	5.080000008	.564444444	25	4	1	346			562	100	1	.05034079879	1	1	0	0	0	0	0	0	0	0	1	1759.303	2067.015	1	27.95322	25.91386
347						5	W	86179	86598							YEL033W	YEL033W||ebi.ac.uk:Database:sgd;A_06_P2574||www.chem.agilent.com:Database:agp		A_06_P2574	1084259	OLIGO	5.291666675	.564444444	26	4	1	347			583	101	1	.2056351637	1	1	0	0	0	0	0	0	0	0	0	135.9725	60.76958	1	6.946301	25.61071
348					VAM3	15	W	519121	519972	vesicle fusion*	t-SNARE activity					YOR106W	YOR106W||ebi.ac.uk:Database:sgd;A_06_P6468||www.chem.agilent.com:Database:agp		A_06_P6468	1086096	OLIGO	5.503333342	.564444444	27	4	1	348			605	100	1	.05742199403	1	1	0	0	0	0	0	0	0	0	1	696.0857	577.5832	1	14.13758	26.675
349						9	C	433717	433385							YIR040C	YIR040C||ebi.ac.uk:Database:sgd;A_06_P4017||www.chem.agilent.com:Database:agp		A_06_P4017	1082065	OLIGO	5.715000009	.564444444	28	4	1	349			626	101	1	.4498138727	1	1	0	0	0	0	0	0	0	0	0	37.61806	45.34231	1	4.772933	27
350					MED1	16	W	685895	687595	transcription from RNA polymerase II promoter	RNA polymerase II transcription mediator activity					YPR070W	YPR070W||ebi.ac.uk:Database:sgd;A_06_P7116||www.chem.agilent.com:Database:agp		A_06_P7116	1081967	OLIGO	5.926666676	.564444444	29	4	1	350			647	100	1	.05295442685	1	1	0	0	0	0	0	0	0	0	1	973.8218	910.6723	1	18.40041	26.11328
352					SRP102	11	W	161606	162340	protein-ER targeting*	GTPase activity*					YKL154W	YKL154W||ebi.ac.uk:Database:sgd;A_06_P4566||www.chem.agilent.com:Database:agp		A_06_P4566	1081678	OLIGO	6.35000001	.564444444	31	4	1	352			689	100	1	.05960957781	1	1	0	0	0	0	0	0	0	0	0	661.2674	489.6329	1	14.22049	26.44882
353					MIH1	13	C	343519	341855	G2/M transition of mitotic cell cycle*	protein tyrosine phosphatase activity					YMR036C	YMR036C||ebi.ac.uk:Database:sgd;A_06_P5465||www.chem.agilent.com:Database:agp		A_06_P5465	1082194	OLIGO	6.561666677	.564444444	32	4	1	353			710	100	1	.06978998223	1	1	0	0	0	0	0	0	0	0	1	417.373	338.3932	1	13.06765	26.82156
354						14	W	418964	419509							YNL109W	YNL109W||ebi.ac.uk:Database:sgd;A_06_P5880||www.chem.agilent.com:Database:agp		A_06_P5880	1084717	OLIGO	6.773333344	.564444444	33	4	1	354			732	100	1	.4073102268	1	1	0	0	0	0	0	0	0	0	1	52.87944	39.28338	1	6.837813	27.39298
355					SEC66	2	W	578359	578979	filamentous growth*	protein transporter activity					YBR171W	YBR171W||ebi.ac.uk:Database:sgd;A_06_P1424||www.chem.agilent.com:Database:agp		A_06_P1424	1081844	OLIGO	6.985000011	.564444444	34	4	1	355			753	101	1	.04939022806	1	1	0	0	0	0	0	0	0	0	1	3705.871	3676.068	1	59.26416	27.6679
356					TIM8	10	W	676886	677149	mitochondrial inner membrane protein import	protein transporter activity					YJR135W-A	YJR135W-A||ebi.ac.uk:Database:sgd;A_06_P4379||www.chem.agilent.com:Database:agp		A_06_P4379	1081639	OLIGO	7.196666678	.564444444	35	4	1	356			774	100	1	.05193007311	1	1	0	0	0	0	0	0	0	0	0	1551.083	2400.175	1	30.19198	27.20513
357					RME1	7	C	583896	582994	meiosis*	specific transcriptional repressor activity					YGR044C	YGR044C||ebi.ac.uk:Database:sgd;A_06_P3264||www.chem.agilent.com:Database:agp		A_06_P3264	1086271	OLIGO	7.408333345	.564444444	36	4	1	357			795	100	1	.04970825975	1	1	0	0	0	0	0	0	0	0	1	2740.058	2518.388	1	34.33539	27.35294
358						13	C	768038	763350	biological process unknown	molecular function unknown					YMR247C	YMR247C||ebi.ac.uk:Database:sgd;A_06_P5687||www.chem.agilent.com:Database:agp		A_06_P5687	1083915	OLIGO	7.620000012	.564444444	37	4	1	358			816	100	1	.05199010685	1	1	0	0	0	0	0	0	0	0	1	1143.933	1057.447	1	17.46777	27.00364
359					ORC3	12	W	141072	142922	DNA replication initiation*	DNA replication origin binding					YLL004W	YLL004W||ebi.ac.uk:Database:sgd;A_06_P4748||www.chem.agilent.com:Database:agp		A_06_P4748	1080778	OLIGO	7.831666679	.564444444	38	4	1	359			837	101	1	.05577963118	1	1	0	0	0	0	0	0	0	0	1	688.2218	713.9861	1	12.78463	27.05364
360					QDR2	9	W	132241	133869	multidrug transport	multidrug efflux pump activity					YIL121W	YIL121W||ebi.ac.uk:Database:sgd;A_06_P3920||www.chem.agilent.com:Database:agp		A_06_P3920	1086888	OLIGO	8.043333346	.564444444	39	4	1	360			859	100	1	.06584587058	1	1	0	0	0	0	0	0	0	0	0	6844.811	1754.075	1	96.49712	27.65568
361					SFC1	10	W	609690	610658	fumarate transport*	succinate:fumarate antiporter activity					YJR095W	YJR095W||ebi.ac.uk:Database:sgd;A_06_P4338||www.chem.agilent.com:Database:agp		A_06_P4338	1085959	OLIGO	8.255000013	.564444444	40	4	1	361			880	100	1	.2145736314	1	1	0	0	0	0	0	0	0	0	1	66.88093	115.132	1	7.75815	27.54167
362						12	C	548771	547855	biological process unknown	molecular function unknown					YLR199C	YLR199C||ebi.ac.uk:Database:sgd;A_06_P5013||www.chem.agilent.com:Database:agp		A_06_P5013	1083706	OLIGO	8.46666668	.564444444	41	4	1	362			900	100	1	.05067135309	1	1	0	0	0	0	0	0	0	0	1	1470.977	1532.338	1	19.69693	27.47037
363					VAC14	12	W	893628	896270	vacuole inheritance*	enzyme activator activity					YLR386W	YLR386W||ebi.ac.uk:Database:sgd;A_06_P5204||www.chem.agilent.com:Database:agp		A_06_P5204	1084471	OLIGO	8.678333347	.564444444	42	4	1	363			922	101	1	.07345901051	1	1	0	0	0	0	0	0	0	0	1	380.4369	305.1895	1	9.646912	27.04135
364																	(+)E1A_r60_a104||AgilentControlDB;E1A_r60_a104||AgilentControlDB		(+)E1A_R60_A104	1545260	CONTROL	8.890000014	.564444444	43	4	1	364			944	99	1	.4943314297	1	1	0	0	0	0	0	0	0	0	0	44.75698	31.25542	1	6.404369	27.57463
365					ECO1	6	W	207440	208285	DNA repair*	acetyltransferase activity					YFR027W	YFR027W||ebi.ac.uk:Database:sgd;A_06_P2923||www.chem.agilent.com:Database:agp		A_06_P2923	1085538	OLIGO	9.101666681	.564444444	44	4	1	365			964	100	1	.07685804071	1	1	0	0	0	0	0	0	0	0	1	363.3082	273.9566	1	9.149829	27.31496
366					SNA3	10	C	136691	136290	biological process unknown	molecular function unknown					YJL151C	YJL151C||ebi.ac.uk:Database:sgd;A_06_P4172||www.chem.agilent.com:Database:agp		A_06_P4172	1084357	OLIGO	9.313333348	.564444444	45	4	1	366			985	100	1	.05508203752	1	1	0	0	0	0	0	0	0	0	0	6268.677	2898.743	1	51.20944	27.07197
367					SBE22	8	W	320416	322974	cell wall organization and biogenesis	molecular function unknown					YHR103W	YHR103W||ebi.ac.uk:Database:sgd;A_06_P3678||www.chem.agilent.com:Database:agp		A_06_P3678	1083955	OLIGO	9.525000015	.564444444	46	4	1	367			1007	101	1	.05055785128	1	1	0	0	0	0	0	0	0	0	1	2010.008	1650.324	1	29.30743	27.01498
368						14	W	222238	222648							YNL226W	YNL226W||ebi.ac.uk:Database:sgd;A_06_P5998||www.chem.agilent.com:Database:agp		A_06_P5998	1081663	OLIGO	9.736666682	.564444444	47	4	1	368			1028	100	1	.5252063525	1	1	0	0	0	0	0	0	0	0	0	37.51344	33.29796	1	4.838945	26.84701
369					LYS5	7	C	216101	215283	lysine biosynthesis via aminoadipic acid*	phosphopantetheinyltransferase activity					YGL154C	YGL154C||ebi.ac.uk:Database:sgd;A_06_P3109||www.chem.agilent.com:Database:agp		A_06_P3109	1081803	OLIGO	9.948333349	.564444444	48	4	1	369			1049	101	1	.05344607973	1	1	0	0	0	0	0	0	0	0	1	907.9324	857.6565	1	17.84752	27.62879
370					SAS10	4	C	183019	181187	processing of 20S pre-rRNA*	snoRNA binding					YDL153C	YDL153C||ebi.ac.uk:Database:sgd;A_06_P1886||www.chem.agilent.com:Database:agp		A_06_P1886	1083490	OLIGO	10.160000016	.564444444	49	4	1	370			1070	100	1	.04950535831	1	1	0	0	0	0	0	0	0	0	1	3202.282	3450.874	1	61.19922	27.23282
371					SHE3	2	C	496863	495586	intracellular mRNA localization*	mRNA binding					YBR130C	YBR130C||ebi.ac.uk:Database:sgd;A_06_P1382||www.chem.agilent.com:Database:agp		A_06_P1382	1083485	OLIGO	10.371666683	.564444444	50	4	1	371			1091	100	1	.05820108898	1	1	0	0	0	0	0	0	0	0	1	571.2064	618.9249	1	12.78825	26.8609
372						4	C	478195	477806							YDR015C	YDR015C||ebi.ac.uk:Database:sgd;A_06_P2000||www.chem.agilent.com:Database:agp		A_06_P2000	1081867	OLIGO	10.58333335	.564444444	51	4	1	372			1113	100	1	.1808345547	1	1	0	0	0	0	0	0	0	0	0	149.5071	73.66995	1	9.051262	27.24364
373					MIG2	7	W	95862	97010	regulation of transcription from RNA polymerase II promoter*	specific RNA polymerase II transcription factor activity					YGL209W	YGL209W||ebi.ac.uk:Database:sgd;A_06_P3164||www.chem.agilent.com:Database:agp		A_06_P3164	1086634	OLIGO	10.795000017	.564444444	52	4	1	373			1134	101	1	.049538869	1	1	0	0	0	0	0	0	0	0	1	3826.515	3405.62	1	50.37803	27.1985
374					TIR4	15	W	344334	345797	biological process unknown	molecular function unknown					YOR009W	YOR009W||ebi.ac.uk:Database:sgd;A_06_P6371||www.chem.agilent.com:Database:agp		A_06_P6371	1081761	OLIGO	11.006666684	.564444444	53	4	1	374			1154	100	1	.1730790528	1	1	0	0	0	0	0	0	0	0	1	149.772	81.48565	1	7.984814	26.71212
375					SKP1	4	C	1126011	1125427	protein complex assembly*	protein binding*					YDR328C	YDR328C||ebi.ac.uk:Database:sgd;A_06_P2319||www.chem.agilent.com:Database:agp		A_06_P2319	1081512	OLIGO	11.218333351	.564444444	54	4	1	375			1176	101	1	.04946614843	1	1	0	0	0	0	0	0	0	0	1	3990.609	4482.153	1	55.63929	27.08993
376						4	W	255604	256530	biological process unknown	molecular function unknown					YDL114W	YDL114W||ebi.ac.uk:Database:sgd;A_06_P1844||www.chem.agilent.com:Database:agp		A_06_P1844	1085162	OLIGO	11.430000018	.564444444	55	4	1	376			1197	100	1	.4049261045	1	1	0	0	0	0	0	0	0	0	0	63.53087	32.14998	1	7.045075	27.45161
377																	E1A_r60_a22||AgilentControlDB;(+)E1A_r60_a22||AgilentControlDB		(+)E1A_R60_A22	1545265	CONTROL	11.641666685	.564444444	56	4	1	377			1218	100	1	.1750959417	1	1	0	0	0	0	0	0	0	0	0	190.0512	59.95916	1	6.863031	27.26103
378					SKI7	15	C	471621	469378	mRNA catabolism*	protein binding					YOR076C	YOR076C||ebi.ac.uk:Database:sgd;A_06_P6438||www.chem.agilent.com:Database:agp		A_06_P6438	1083745	OLIGO	11.853333352	.564444444	57	4	1	378			1239	100	1	.05539618464	1	1	0	0	0	0	0	0	0	0	1	752.5614	699.611	1	16.26605	27.26429
379						12	W	346586	346981	biological process unknown	molecular function unknown					YLR104W	YLR104W||ebi.ac.uk:Database:sgd;A_06_P4917||www.chem.agilent.com:Database:agp		A_06_P4917	1081207	OLIGO	12.065000019	.564444444	58	4	1	379			1260	100	1	.0818609127	1	1	0	0	0	0	0	0	0	0	1	304.2309	263.016	1	8.173117	27.37363
380					ERG7	8	W	239099	241294	ergosterol biosynthesis	lanosterol synthase activity					YHR072W	YHR072W||ebi.ac.uk:Database:sgd;A_06_P3645||www.chem.agilent.com:Database:agp		A_06_P3645	1086748	OLIGO	12.276666686	.564444444	59	4	1	380			1282	100	1	.04958080905	1	1	0	0	0	0	0	0	0	0	1	7973.741	9724.064	1	110.5228	26.70758
381						10	W	376578	377252	biological process unknown	molecular function unknown					YJL037W	YJL037W||ebi.ac.uk:Database:sgd;A_06_P4058||www.chem.agilent.com:Database:agp		A_06_P4058	1086823	OLIGO	12.488333353	.564444444	60	4	1	381			1303	101	1	.2911093899	1	1	0	0	0	0	0	0	0	0	1	53.54216	76.85186	1	7.092493	27.35075
382					PRE9	7	W	761397	762173	ubiquitin-dependent protein catabolism*	endopeptidase activity					YGR135W	YGR135W||ebi.ac.uk:Database:sgd;A_06_P3356||www.chem.agilent.com:Database:agp		A_06_P3356	1086487	OLIGO	12.70000002	.564444444	61	4	1	382			1324	100	1	.04926453977	1	1	0	0	0	0	0	0	0	0	1	6648.127	7162.53	1	78.86866	26.9962
383					FUR1	8	W	362117	362767	pyrimidine salvage	uracil phosphoribosyltransferase activity					YHR128W	YHR128W||ebi.ac.uk:Database:sgd;A_06_P3703||www.chem.agilent.com:Database:agp		A_06_P3703	1084228	OLIGO	12.911666687	.564444444	62	4	1	383			1345	101	1	.04996271041	1	1	0	0	0	0	0	0	0	0	1	2614.787	2241.839	1	38.10821	26.79197
384					ATH1	16	W	615376	619011	response to stress*	alpha,alpha-trehalase activity					YPR026W	YPR026W||ebi.ac.uk:Database:sgd;A_06_P7072||www.chem.agilent.com:Database:agp		A_06_P7072	1086786	OLIGO	13.123333354	.564444444	63	4	1	384			1366	100	1	.05850635594	1	1	0	0	0	0	0	0	0	0	0	811.0455	516.1944	1	14.29925	26.70968
385					VCX1	4	W	232652	233887	calcium ion homeostasis*	calcium ion transporter activity*					YDL128W	YDL128W||ebi.ac.uk:Database:sgd;A_06_P1859||www.chem.agilent.com:Database:agp		A_06_P1859	1082383	OLIGO	13.335000021	.564444444	64	4	1	385			1388	101	1	.05513385587	1	1	0	0	0	0	0	0	0	0	0	9197.474	4212.254	1	133.8085	26.603
386					MPA43	14	C	181021	179393	biological process unknown	molecular function unknown					YNL249C	YNL249C||ebi.ac.uk:Database:sgd;A_06_P6021||www.chem.agilent.com:Database:agp		A_06_P6021	1081856	OLIGO	13.546666688	.564444444	65	4	1	386			1409	100	1	.09825422511	1	1	0	0	0	0	0	0	0	0	1	255.509	185.9124	1	8.652309	26.33582
387						15	W	779870	780184							YOR235W	YOR235W||ebi.ac.uk:Database:sgd;A_06_P6597||www.chem.agilent.com:Database:agp		A_06_P6597	1081795	OLIGO	13.758333355	.564444444	66	4	1	387			1430	100	1	.4052930077	1	1	0	0	0	0	0	0	0	0	1	55.63031	37.52633	1	5.542162	26.48708
388					PUS1	16	C	153148	151514	tRNA modification	tRNA-pseudouridine synthase activity					YPL212C	YPL212C||ebi.ac.uk:Database:sgd;A_06_P6972||www.chem.agilent.com:Database:agp		A_06_P6972	1082079	OLIGO	13.970000022	.564444444	67	4	1	388			1451	100	1	.05045316006	1	1	0	0	0	0	0	0	0	0	1	1596.171	1641.3	1	23.75282	26.43571
389					GPI17	4	W	1331227	1332831	attachment of GPI anchor to protein	GPI-anchor transamidase activity					YDR434W	YDR434W||ebi.ac.uk:Database:sgd;A_06_P2427||www.chem.agilent.com:Database:agp		A_06_P2427	1085283	OLIGO	14.181666689	.564444444	68	4	1	389			1473	101	1	.04958697719	1	1	0	0	0	0	0	0	0	0	1	5249.575	4417.947	1	65.65659	26.50929
390																	(+)E1A_r60_1||AgilentControlDB;E1A_r60_1||AgilentControlDB		(+)E1A_R60_1	1545263	CONTROL	14.393333356	.564444444	69	4	1	390			1493	101	1	.312307177	1	1	0	0	0	0	0	0	0	0	0	78.86125	44.51447	1	5.261686	26.90494
391					TWF1	7	W	642014	643012	bipolar bud site selection*	actin monomer binding					YGR080W	YGR080W||ebi.ac.uk:Database:sgd;A_06_P3300||www.chem.agilent.com:Database:agp		A_06_P3300	1080972	OLIGO	14.605000023	.564444444	70	4	1	391			1515	101	1	.05518570344	1	1	0	0	0	0	0	0	0	0	1	758.2593	717.6656	1	16.85623	26.85448
392					ADH2	13	C	874336	873290	fermentation*	alcohol dehydrogenase activity					YMR303C	YMR303C||ebi.ac.uk:Database:sgd;A_06_P5744||www.chem.agilent.com:Database:agp		A_06_P5744	1082278	OLIGO	14.81666669	.564444444	71	4	1	392			1536	101	1	.05624525713	1	1	0	0	0	0	0	0	0	0	1	656.0814	699.0962	1	11.47849	26.86989
393					VPS60	4	C	1428110	1427421	filamentous growth*	molecular function unknown					YDR486C	YDR486C||ebi.ac.uk:Database:sgd;A_06_P2479||www.chem.agilent.com:Database:agp		A_06_P2479	1085831	OLIGO	15.028333357	.564444444	72	4	1	393			1557	101	1	.05049549181	1	1	0	0	0	0	0	0	0	0	1	1563.022	1692.912	1	26.58389	26.24815
394					VPS28	16	W	427924	428652	protein-vacuolar targeting*	molecular function unknown					YPL065W	YPL065W||ebi.ac.uk:Database:sgd;A_06_P6824||www.chem.agilent.com:Database:agp		A_06_P6824	1085618	OLIGO	15.240000024	.564444444	73	4	1	394			1578	101	1	.05663919661	1	1	0	0	0	0	0	0	0	0	1	631.5351	688.0959	1	15.85773	26.26022
395						12	W	855537	855842							YLR366W	YLR366W||ebi.ac.uk:Database:sgd;A_06_P5184||www.chem.agilent.com:Database:agp		A_06_P5184	1084705	OLIGO	15.451666691	.564444444	74	4	1	395			1599	101	1	.5612504821	1	1	0	0	0	0	0	0	0	0	0	25.87123	41.53083	1	4.925463	26.55682
396					STU1	2	C	158392	153851	microtubule nucleation	structural constituent of cytoskeleton					YBL034C	YBL034C||ebi.ac.uk:Database:sgd;A_06_P1164||www.chem.agilent.com:Database:agp		A_06_P1164	1081984	OLIGO	15.663333358	.564444444	75	4	1	396			1620	100	1	.05506140075	1	1	0	0	0	0	0	0	0	0	0	1271.245	757.5406	1	19.56685	26.01154
397					COX2	17	W	73758	74513	aerobic respiration*	cytochrome-c oxidase activity					Q0250	Q0250||ebi.ac.uk:Database:sgd;A_06_P1020||www.chem.agilent.com:Database:agp		A_06_P1020	1086746	OLIGO	15.875000025	.564444444	76	4	1	397			1641	101	1	.08934512103	1	1	0	0	0	0	0	0	0	0	0	351.1007	182.9365	1	10.70972	26.14498
398						7	W	593600	594709	biological process unknown	kinase activity					YGR052W	YGR052W||ebi.ac.uk:Database:sgd;A_06_P3272||www.chem.agilent.com:Database:agp		A_06_P3272	1084839	OLIGO	16.086666692	.564444444	77	4	1	398			1663	100	1	.1497908291	1	1	0	0	0	0	0	0	0	0	1	94.04441	179.1793	1	6.356777	26.48193
399						5	C	302325	301945	biological process unknown	molecular function unknown					YER071C	YER071C||ebi.ac.uk:Database:sgd;A_06_P2702||www.chem.agilent.com:Database:agp		A_06_P2702	1081643	OLIGO	16.298333359	.564444444	78	4	1	399			1684	101	1	.1486636908	1	1	0	0	0	0	0	0	0	0	1	136.5441	127.1811	1	7.642885	26.71747
400					TNA1	7	W	1012491	1014095	nicotinamide mononucleotide transport	nicotinamide mononucleotide permease activity					YGR260W	YGR260W||ebi.ac.uk:Database:sgd;A_06_P3481||www.chem.agilent.com:Database:agp		A_06_P3481	1083396	OLIGO	16.510000026	.564444444	79	4	1	400			1706	100	1	.05164050642	1	1	0	0	0	0	0	0	0	0	0	4802.448	2981.577	1	72.83956	25.88235
401					LYS20	4	W	133438	134724	lysine biosynthesis via aminoadipic acid	homocitrate synthase activity					YDL182W	YDL182W||ebi.ac.uk:Database:sgd;A_06_P1916||www.chem.agilent.com:Database:agp		A_06_P1916	1085017	OLIGO	16.721666693	.564444444	80	4	1	401			1726	101	1	.05107005897	1	1	0	0	0	0	0	0	0	0	1	10894	16857.32	1	111.3327	26.14126
402					TRM10	15	W	142814	143695	tRNA methylation	tRNA (guanine) methyltransferase activity					YOL093W	YOL093W||ebi.ac.uk:Database:sgd;A_06_P6286||www.chem.agilent.com:Database:agp		A_06_P6286	1086290	OLIGO	16.93333336	.564444444	81	4	1	402			1747	101	1	.05003600415	1	1	0	0	0	0	0	0	0	0	1	1935.383	2004.055	1	25.3004	26.03584
403																	E1A_r60_n11||AgilentControlDB;(+)E1A_r60_n11||AgilentControlDB		(+)E1A_R60_N11	1545266	CONTROL	17.145000027	.564444444	82	4	1	403			1768	101	1	.08866842718	1	1	0	0	0	0	0	0	0	0	0	248.369	252.7133	1	9.429366	26.25651
404					GDI1	5	W	439612	440967	vesicle-mediated transport	Rab GDP-dissociation inhibitor activity					YER136W	YER136W||ebi.ac.uk:Database:sgd;A_06_P2769||www.chem.agilent.com:Database:agp		A_06_P2769	1086736	OLIGO	17.356666694	.564444444	83	4	1	404			1789	100	1	.050008822	1	1	0	0	0	0	0	0	0	0	1	2786.106	2319.045	1	48.5988	26.35165
405					HES1	15	W	781994	783298	steroid biosynthesis	oxysterol binding					YOR237W	YOR237W||ebi.ac.uk:Database:sgd;A_06_P6599||www.chem.agilent.com:Database:agp		A_06_P6599	1085652	OLIGO	17.568333361	.564444444	84	4	1	405			1811	101	1	.1100412962	1	1	0	0	0	0	0	0	0	0	1	223.6935	158.0732	1	8.592416	25.99623
406					CDC2	4	W	276872	280165	nucleotide-excision repair*	delta DNA polymerase activity					YDL102W	YDL102W||ebi.ac.uk:Database:sgd;A_06_P1832||www.chem.agilent.com:Database:agp		A_06_P1832	1081461	OLIGO	17.780000028	.564444444	85	4	1	406			1832	101	1	.04985454634	1	1	0	0	0	0	0	0	0	0	1	2174.541	2283.081	1	38.16077	26.03774
407						1	W	74021	74824	biological process unknown	molecular function unknown					YAL037W	YAL037W||ebi.ac.uk:Database:sgd;A_06_P1061||www.chem.agilent.com:Database:agp		A_06_P1061	1084528	OLIGO	17.991666695	.564444444	86	4	1	407			1853	101	1	.105383918	1	1	0	0	0	0	0	0	0	0	1	239.797	164.8348	1	6.554378	26.19084
408					NAM2	12	C	884751	882067	Group I intron splicing*	mRNA binding*					YLR382C	YLR382C||ebi.ac.uk:Database:sgd;A_06_P5200||www.chem.agilent.com:Database:agp		A_06_P5200	1082001	OLIGO	18.203333362	.564444444	87	4	1	408			1874	101	1	.05598891287	1	1	0	0	0	0	0	1	0	0	1	719.7728	664.8209	1	16.34376	26.01481
409						9	C	32566	30938	transport	transporter activity					YIL166C	YIL166C||ebi.ac.uk:Database:sgd;A_06_P3965||www.chem.agilent.com:Database:agp		A_06_P3965	1081675	OLIGO	18.415000029	.564444444	88	4	1	409			1896	101	1	.140067314	1	1	0	0	0	0	0	0	0	0	1	159.4417	124.4611	1	10.04354	26
410						7	W	303516	303839							YGL109W	YGL109W||ebi.ac.uk:Database:sgd;A_06_P3064||www.chem.agilent.com:Database:agp		A_06_P3064	1081360	OLIGO	18.626666696	.564444444	89	4	1	410			1916	100	1	.4764960667	1	1	0	0	0	0	0	0	0	0	0	46.7636	32.19499	1	6.425612	26.00377
411					ISU2	15	C	762084	761614	iron ion homeostasis*	molecular function unknown					YOR226C	YOR226C||ebi.ac.uk:Database:sgd;A_06_P6588||www.chem.agilent.com:Database:agp		A_06_P6588	1080912	OLIGO	18.838333363	.564444444	90	4	1	411			1938	101	1	.06295208952	1	1	0	0	0	0	0	0	0	0	1	472.771	467.032	1	11.89732	25.6203
412					STP4	4	C	368211	366739	biological process unknown	molecular function unknown					YDL048C	YDL048C||ebi.ac.uk:Database:sgd;A_06_P1777||www.chem.agilent.com:Database:agp		A_06_P1777	1084424	OLIGO	19.05000003	.564444444	91	4	1	412			1959	100	1	.0874661524	1	1	0	0	0	0	0	0	0	0	1	221.9512	296.9936	1	7.464957	25.77737
413					TYR1	2	C	571195	569837	tyrosine metabolism	prephenate dehydrogenase activity					YBR166C	YBR166C||ebi.ac.uk:Database:sgd;A_06_P1419||www.chem.agilent.com:Database:agp		A_06_P1419	1081537	OLIGO	19.261666697	.564444444	92	4	1	413			1980	101	1	.05122083287	1	1	0	0	0	0	0	0	0	0	1	1263.434	1296.99	1	19.52695	25.62921
414						8	C	125674	124103	biological process unknown	molecular function unknown					YHR009C	YHR009C||ebi.ac.uk:Database:sgd;A_06_P3579||www.chem.agilent.com:Database:agp		A_06_P3579	1084215	OLIGO	19.473333364	.564444444	93	4	1	414			2001	101	1	.04927707554	1	1	0	0	0	0	0	0	0	0	1	5108.943	5301.554	1	82.08378	25.37778
415					STR2	10	C	667052	665133	sulfur metabolism	cystathionine gamma-synthase activity					YJR130C	YJR130C||ebi.ac.uk:Database:sgd;A_06_P4373||www.chem.agilent.com:Database:agp		A_06_P4373	1085482	OLIGO	19.685000031	.564444444	94	4	1	415			2022	101	1	.05263865024	1	1	0	0	0	0	0	0	0	0	0	937.8169	1127.325	1	19.4394	25.42086
416																	(+)E1A_r60_a20||AgilentControlDB;E1A_r60_a20||AgilentControlDB		(+)E1A_R60_A20	1545259	CONTROL	19.896666698	.564444444	95	4	1	416			2044	100	1	.2722549513	1	1	0	0	0	0	0	0	0	0	0	89.1448	52.46175	1	8.004928	25.9304
417					UFD2	4	C	121593	118708	response to stress*	ubiquitin conjugating enzyme activity					YDL190C	YDL190C||ebi.ac.uk:Database:sgd;A_06_P1925||www.chem.agilent.com:Database:agp		A_06_P1925	1083558	OLIGO	20.108333365	.564444444	96	4	1	417			2065	101	1	.04996006261	1	1	0	0	0	0	0	0	0	0	1	2076.054	2027.746	1	37.6199	25.93411
418					GPI8	4	W	1129581	1130816	attachment of GPI anchor to protein	GPI-anchor transamidase activity					YDR331W	YDR331W||ebi.ac.uk:Database:sgd;A_06_P2322||www.chem.agilent.com:Database:agp		A_06_P2322	1082623	OLIGO	20.320000032	.564444444	97	4	1	418			2086	100	1	.05412787985	1	1	0	0	0	0	0	0	0	0	0	1148.184	788.454	1	22.88149	25.40502
419						1	W	140762	141409							YAL004W	YAL004W||ebi.ac.uk:Database:sgd;A_06_P1027||www.chem.agilent.com:Database:agp		A_06_P1027	1086845	OLIGO	20.531666699	.564444444	98	4	1	419			2107	101	1	.0816471258	1	1	0	0	0	0	0	0	0	0	1	260.3408	310.3622	1	9.909675	25.91176
420						7	C	592446	592090							YGR050C	YGR050C||ebi.ac.uk:Database:sgd;A_06_P3270||www.chem.agilent.com:Database:agp		A_06_P3270	1080771	OLIGO	20.743333366	.564444444	99	4	1	420			2129	101	1	.558144596	1	1	0	0	0	0	0	0	0	0	1	35.64417	30.98508	1	6.583724	25.76154
421					HSM3	2	C	747798	746356	mismatch repair	molecular function unknown					YBR272C	YBR272C||ebi.ac.uk:Database:sgd;A_06_P1526||www.chem.agilent.com:Database:agp		A_06_P1526	1084355	OLIGO	20.955000033	.564444444	100	4	1	421			2150	102	1	.05510480161	1	1	0	0	0	0	0	0	0	0	1	725.6254	759.6631	1	16.6433	25.14672
422						2	C	90923	90603							YBL070C	YBL070C||ebi.ac.uk:Database:sgd;A_06_P1201||www.chem.agilent.com:Database:agp		A_06_P1201	1086904	OLIGO	21.1666667	.564444444	101	4	1	422			2170	100	1	.5585427703	1	1	0	0	0	0	0	0	0	0	0	30.31986	36.33566	1	5.778462	25.85348
423					PUB1	14	W	602906	604267	mRNA catabolism, nonsense-mediated decay	nucleic acid binding					YNL016W	YNL016W||ebi.ac.uk:Database:sgd;A_06_P5787||www.chem.agilent.com:Database:agp		A_06_P5787	1082148	OLIGO	21.378333367	.564444444	102	4	1	423			2191	101	1	.05098830316	1	1	0	0	0	0	0	0	0	0	0	2710.054	1917.758	1	40.70191	25.44186
424					NUF2	15	W	198941	200296	chromosome segregation*	structural constituent of cytoskeleton					YOL069W	YOL069W||ebi.ac.uk:Database:sgd;A_06_P6261||www.chem.agilent.com:Database:agp		A_06_P6261	1083641	OLIGO	21.590000034	.564444444	103	4	1	424			2213	101	1	.07536232768	1	1	0	0	0	0	0	0	0	0	1	380.3727	281.1391	1	11.41444	25.06762
425					NVJ1	8	W	490746	491711	microautophagy	protein binding					YHR195W	YHR195W||ebi.ac.uk:Database:sgd;A_06_P3773||www.chem.agilent.com:Database:agp		A_06_P3773	1081547	OLIGO	21.801666701	.564444444	104	4	1	425			2234	101	1	.05217448528	1	1	0	0	0	0	0	0	0	0	1	1019.587	1121.373	1	14.55201	25.83516
426					FLO8	5	C	377610	375211	pseudohyphal growth*	specific RNA polymerase II transcription factor activity					YER109C	YER109C||ebi.ac.uk:Database:sgd;A_06_P2741||www.chem.agilent.com:Database:agp		A_06_P2741	1080911	OLIGO	22.013333368	.564444444	105	4	1	426			2255	101	1	.06827579699	1	1	0	0	0	0	0	0	0	0	1	388.3164	391.8264	1	10.64746	25.86182
427					DAL7	9	C	414676	413012	allantoin catabolism	malate synthase activity					YIR031C	YIR031C||ebi.ac.uk:Database:sgd;A_06_P4008||www.chem.agilent.com:Database:agp		A_06_P4008	1083212	OLIGO	22.225000035	.564444444	106	4	1	427			2277	102	1	.08272303928	1	1	0	0	0	0	0	0	0	0	0	2884.918	386.3432	1	41.12397	25.64576
428						4	W	734133	734798	peptidyl-glutamine methylation	S-adenosylmethionine-dependent methyltransferase activity*					YDR140W	YDR140W||ebi.ac.uk:Database:sgd;A_06_P2128||www.chem.agilent.com:Database:agp		A_06_P2128	1082252	OLIGO	22.436666702	.564444444	107	4	1	428			2297	101	1	.05679365934	1	1	0	0	0	0	0	0	0	0	0	591.8985	908.7776	1	12.92162	24.65108
429					MAL13	7	W	1070299	1071720	regulation of transcription, DNA-dependent*	transcription factor activity					YGR288W	YGR288W||ebi.ac.uk:Database:sgd;A_06_P3510||www.chem.agilent.com:Database:agp		A_06_P3510	1085637	OLIGO	0	.752592592	1	5	1	429			54	118	1	.2087298761	1	1	0	0	0	0	0	0	0	0	0	144.6481	54.34982	1	9.873111	25.43911
430					SBE2	4	W	1178657	1181251	cell wall organization and biogenesis	molecular function unknown					YDR351W	YDR351W||ebi.ac.uk:Database:sgd;A_06_P2342||www.chem.agilent.com:Database:agp		A_06_P2342	1086067	OLIGO	.211666667	.752592592	2	5	1	430			75	119	1	.05094026707	1	1	0	0	0	0	0	0	0	0	1	1355.915	1405.747	1	23.84625	26.71103
431						4	C	1525506	1525078							YDR544C	YDR544C||ebi.ac.uk:Database:sgd;A_06_P2538||www.chem.agilent.com:Database:agp		A_06_P2538	1083139	OLIGO	.423333334	.752592592	3	5	1	431			96	118	1	.4399513517	1	1	0	0	0	0	0	0	0	0	1	55.31212	31.55845	1	5.318686	26.53114
432					BUD8	12	W	834351	836162	pseudohyphal growth*	molecular function unknown					YLR353W	YLR353W||ebi.ac.uk:Database:sgd;A_06_P5170||www.chem.agilent.com:Database:agp		A_06_P5170	1084256	OLIGO	.635000001	.752592592	4	5	1	432			118	119	1	.05817083649	1	1	0	0	0	0	0	0	0	0	0	1130.183	574.4955	1	18.08674	26.57143
433						1	C	57386	57030	biological process unknown	molecular function unknown					YAL046C	YAL046C||ebi.ac.uk:Database:sgd;A_06_P1072||www.chem.agilent.com:Database:agp		A_06_P1072	1086143	OLIGO	.846666668	.752592592	5	5	1	433			139	118	1	.05421286464	1	1	0	0	0	0	0	0	0	0	0	1001.489	1788.093	1	16.11342	26.1362
434					BUD6	12	C	771684	769318	actin filament organization*	cytoskeletal regulatory protein binding					YLR319C	YLR319C||ebi.ac.uk:Database:sgd;A_06_P5136||www.chem.agilent.com:Database:agp		A_06_P5136	1086525	OLIGO	1.058333335	.752592592	6	5	1	434			160	119	1	.05578825266	1	1	0	0	0	0	0	0	0	0	0	849.9801	644.0543	1	16.34727	26.01087
435						11	C	49810	49007	biological process unknown	molecular function unknown					YKL206C	YKL206C||ebi.ac.uk:Database:sgd;A_06_P4618||www.chem.agilent.com:Database:agp		A_06_P4618	1086360	OLIGO	1.270000002	.752592592	7	5	1	435			181	118	1	.05016225876	1	1	0	0	0	0	0	0	0	0	1	1952.109	1813.332	1	39.00296	26.79078
436																	(+)E1A_r60_1||AgilentControlDB;E1A_r60_1||AgilentControlDB		(+)E1A_R60_1	1545263	CONTROL	1.481666669	.752592592	8	5	1	436			203	119	1	.3093169631	1	1	0	0	0	0	0	0	0	0	0	73.32372	49.44264	1	7.191738	26.6679
437					MRS2	15	W	944591	946003	mitochondrial magnesium ion transport*	magnesium ion transporter activity					YOR334W	YOR334W||ebi.ac.uk:Database:sgd;A_06_P6698||www.chem.agilent.com:Database:agp		A_06_P6698	1083664	OLIGO	1.693333336	.752592592	9	5	1	437			224	119	1	.1220233601	1	1	0	0	0	0	0	0	0	0	1	183.5325	149.3214	1	9.109504	26.76515
438					COX10	16	C	225740	224352	protein complex assembly*	protoheme IX farnesyltransferase activity					YPL172C	YPL172C||ebi.ac.uk:Database:sgd;A_06_P6931||www.chem.agilent.com:Database:agp		A_06_P6931	1081425	OLIGO	1.905000003	.752592592	10	5	1	438			245	119	1	.06420972791	1	1	0	0	0	0	0	0	0	0	0	512.215	402.5649	1	14.44937	26.59023
439					PEX31	7	W	502942	504330	peroxisome organization and biogenesis	molecular function unknown					YGR004W	YGR004W||ebi.ac.uk:Database:sgd;A_06_P3224||www.chem.agilent.com:Database:agp		A_06_P3224	1082387	OLIGO	2.11666667	.752592592	11	5	1	439			266	119	1	.07951077649	1	1	0	0	0	0	0	0	0	0	1	350.707	254.1459	1	10.35913	26.68045
440						1	C	217483	217148							YAR060C	YAR060C||ebi.ac.uk:Database:sgd;A_06_P1119||www.chem.agilent.com:Database:agp		A_06_P1119	1086627	OLIGO	2.328333337	.752592592	12	5	1	440			287	119	1	.1411829211	1	1	0	0	0	0	0	0	0	0	1	170.4119	114.068	1	9.756212	26.92045
441						11	W	469360	470982	biological process unknown	molecular function unknown					YKR016W	YKR016W||ebi.ac.uk:Database:sgd;A_06_P4653||www.chem.agilent.com:Database:agp		A_06_P4653	1080882	OLIGO	2.540000004	.752592592	13	5	1	441			308	118	1	.05033261661	1	1	0	0	0	0	0	0	0	0	1	1698.716	1910.749	1	25.67942	26.73208
442					VPS53	10	C	390769	388301	Golgi to vacuole transport*	protein binding					YJL029C	YJL029C||ebi.ac.uk:Database:sgd;A_06_P4050||www.chem.agilent.com:Database:agp		A_06_P4050	1085902	OLIGO	2.751666671	.752592592	14	5	1	442			329	119	1	.05263681478	1	1	0	0	0	0	0	0	0	0	1	952.7989	1019.838	1	16.74161	26.84074
443					MNN10	4	W	952794	953975	actin filament organization*	alpha-1,6-mannosyltransferase activity					YDR245W	YDR245W||ebi.ac.uk:Database:sgd;A_06_P2234||www.chem.agilent.com:Database:agp		A_06_P2234	1084345	OLIGO	2.963333338	.752592592	15	5	1	443			350	118	1	.04924812973	1	1	0	0	0	0	0	1	0	0	1	5962.339	5760.426	1	94.12951	26.58427
444						14	W	542303	542821	biological process unknown	molecular function unknown					YNL046W	YNL046W||ebi.ac.uk:Database:sgd;A_06_P5817||www.chem.agilent.com:Database:agp		A_06_P5817	1086698	OLIGO	3.175000005	.752592592	16	5	1	444			372	119	1	.05191056124	1	1	0	0	0	0	0	0	0	0	1	1174.787	1070.29	1	17.82062	26.80797
445					ICE2	9	W	193592	195067	ER organization and biogenesis	molecular function unknown					YIL090W	YIL090W||ebi.ac.uk:Database:sgd;A_06_P3889||www.chem.agilent.com:Database:agp		A_06_P3889	1081562	OLIGO	3.386666672	.752592592	17	5	1	445			393	118	1	.05280168759	1	1	0	0	0	0	0	0	0	0	0	1317.095	954.7775	1	20.7638	26.70677
446					ERV29	7	C	1061596	1060664	ER to Golgi transport	molecular function unknown					YGR284C	YGR284C||ebi.ac.uk:Database:sgd;A_06_P3506||www.chem.agilent.com:Database:agp		A_06_P3506	1084118	OLIGO	3.598333339	.752592592	18	5	1	446			414	119	1	.05448167417	1	1	0	0	0	0	0	0	0	0	0	6324.312	3051.421	1	74.27774	26.61765
447					VAR1	17	W	48901	50097	protein biosynthesis*	structural constituent of ribosome					Q0140	Q0140||ebi.ac.uk:Database:sgd;A_06_P1017||www.chem.agilent.com:Database:agp		A_06_P1017	1084236	OLIGO	3.810000006	.752592592	19	5	1	447			435	118	1	.1127044626	1	1	0	0	0	0	0	0	0	0	0	250.6058	133.5212	1	9.814567	26.48327
448					DIN7	4	C	995528	994236	DNA repair	nuclease activity					YDR263C	YDR263C||ebi.ac.uk:Database:sgd;A_06_P2252||www.chem.agilent.com:Database:agp		A_06_P2252	1085555	OLIGO	4.021666673	.752592592	20	5	1	448			456	119	1	.08213127563	1	1	0	0	0	0	0	0	0	0	0	488.8573	189.763	1	12.06114	26.91636
449																	(+)E1A_r60_a104||AgilentControlDB;E1A_r60_a104||AgilentControlDB		(+)E1A_R60_A104	1545260	CONTROL	4.23333334	.752592592	21	5	1	449			477	119	1	.4916756013	1	1	0	0	0	0	0	0	0	0	0	40.42804	35.28756	1	6.108421	26.64312
450					TIP20	7	W	230248	232353	retrograde transport, Golgi to ER	molecular function unknown					YGL145W	YGL145W||ebi.ac.uk:Database:sgd;A_06_P3100||www.chem.agilent.com:Database:agp		A_06_P3100	1082764	OLIGO	4.445000007	.752592592	22	5	1	450			498	119	1	.06175751568	1	1	0	0	0	0	0	0	0	0	1	476.6943	514.3294	1	10.68868	26.89377
451						13	C	605519	603867	biological process unknown	molecular function unknown					YMR171C	YMR171C||ebi.ac.uk:Database:sgd;A_06_P5606||www.chem.agilent.com:Database:agp		A_06_P5606	1085890	OLIGO	4.656666674	.752592592	23	5	1	451			520	118	1	.05931650749	1	1	0	0	0	0	0	0	0	0	0	737.2448	489.2499	1	13.28311	26.69145
452					ALG7	2	C	706788	705442	protein amino acid N-linked glycosylation	UDP-N-acetylglucosamine-dolichyl-phosphate N-acetylglucosaminephosphotransferase activity					YBR243C	YBR243C||ebi.ac.uk:Database:sgd;A_06_P1497||www.chem.agilent.com:Database:agp		A_06_P1497	1082776	OLIGO	4.868333341	.752592592	24	5	1	452			541	119	1	.05232839211	1	1	0	0	0	0	0	0	0	0	0	3222.716	1920.94	1	45.05835	26.41007
453						4	C	1461544	1459718	biological process unknown	molecular function unknown					YDR506C	YDR506C||ebi.ac.uk:Database:sgd;A_06_P2499||www.chem.agilent.com:Database:agp		A_06_P2499	1081040	OLIGO	5.080000008	.752592592	25	5	1	453			562	118	1	.06416162363	1	1	0	0	0	0	0	0	0	0	1	466.7706	431.6238	1	13.33467	26.2674
454					COS8	8	W	6400	7545	response to unfolded protein	molecular function unknown					YHL048W	YHL048W||ebi.ac.uk:Database:sgd;A_06_P3566||www.chem.agilent.com:Database:agp		A_06_P3566	1084082	OLIGO	5.291666675	.752592592	26	5	1	454			583	120	1	.05537334854	1	1	0	0	0	0	0	0	0	0	1	716.8568	732.0698	1	14.01512	26.09127
455					MFA2	14	W	352414	352530	signal transduction during conjugation with cellular fusion	mating pheromone activity					YNL145W	YNL145W||ebi.ac.uk:Database:sgd;A_06_P5916||www.chem.agilent.com:Database:agp		A_06_P5916	1086000	OLIGO	5.503333342	.752592592	27	5	1	455			604	119	1	.04944054369	1	1	0	0	0	0	0	0	0	0	1	3363.599	3454.051	1	41.0777	26.73063
456					NIF3	7	C	82291	81425	biological process unknown	molecular function unknown					YGL221C	YGL221C||ebi.ac.uk:Database:sgd;A_06_P3176||www.chem.agilent.com:Database:agp		A_06_P3176	1082142	OLIGO	5.715000009	.752592592	28	5	1	456			626	120	1	.04999484541	1	1	0	0	0	0	0	0	0	0	1	9058.276	12053.14	1	129.7727	26.53532
457						12	W	827520	828026							YLR349W	YLR349W||ebi.ac.uk:Database:sgd;A_06_P5166||www.chem.agilent.com:Database:agp		A_06_P5166	1082312	OLIGO	5.926666676	.752592592	29	5	1	457			647	118	1	.3577319773	1	1	0	0	0	0	0	0	0	0	0	81.01604	31.44069	1	6.839068	26.78846
458					COX5B	9	W	155219	155762	mitochondrial electron transport, cytochrome c to oxygen*	cytochrome-c oxidase activity					YIL111W	YIL111W||ebi.ac.uk:Database:sgd;A_06_P3910||www.chem.agilent.com:Database:agp		A_06_P3910	1085590	OLIGO	6.138333343	.752592592	30	5	1	458			668	119	1	.0524217412	1	1	0	0	0	0	0	0	0	0	0	3429.628	2014.709	1	52.20025	26.72426
459					SNF2	15	C	860255	855144	chromatin remodeling	general RNA polymerase II transcription factor activity					YOR290C	YOR290C||ebi.ac.uk:Database:sgd;A_06_P6651||www.chem.agilent.com:Database:agp		A_06_P6651	1082384	OLIGO	6.35000001	.752592592	31	5	1	459			689	118	1	.05447047263	1	1	0	0	0	0	0	0	0	0	0	1352.9	821.1923	1	23.22887	26.80147
460					EXG2	4	C	979203	977515	cell wall organization and biogenesis	glucan 1,3-beta-glucosidase activity					YDR261C	YDR261C||ebi.ac.uk:Database:sgd;A_06_P2250||www.chem.agilent.com:Database:agp		A_06_P2250	1082733	OLIGO	6.561666677	.752592592	32	5	1	460			710	119	1	.05161768541	1	1	0	0	0	0	0	0	0	0	0	1175.877	1487.191	1	18.57755	26.64621
461					PSD1	14	C	317671	316169	phosphatidylcholine biosynthesis	phosphatidylserine decarboxylase activity					YNL169C	YNL169C||ebi.ac.uk:Database:sgd;A_06_P5941||www.chem.agilent.com:Database:agp		A_06_P5941	1081334	OLIGO	6.773333344	.752592592	33	5	1	461			732	119	1	.05199207479	1	1	0	0	0	0	0	0	0	0	0	4577.305	2748.562	1	40.78353	27.30935
462																	(+)E1A_r60_3||AgilentControlDB;E1A_r60_3||AgilentControlDB		(+)E1A_R60_3	1545261	CONTROL	6.985000011	.752592592	34	5	1	462			753	119	1	.4587200784	1	1	0	0	0	0	0	0	0	0	0	45.26327	36.17398	1	5.107152	27.73585
463						2	W	454816	457659	biological process unknown	molecular function unknown					YBR108W	YBR108W||ebi.ac.uk:Database:sgd;A_06_P1360||www.chem.agilent.com:Database:agp		A_06_P1360	1085756	OLIGO	7.196666678	.752592592	35	5	1	463			774	119	1	.1405674487	1	1	0	0	0	0	0	0	0	0	1	169.7578	115.7032	1	7.551299	27.95522
464					PHO11	1	W	225451	226854	phosphate metabolism	acid phosphatase activity					YAR071W	YAR071W||ebi.ac.uk:Database:sgd;A_06_P1127||www.chem.agilent.com:Database:agp		A_06_P1127	1085164	OLIGO	7.408333345	.752592592	36	5	1	464			795	119	1	.0494789858	1	1	0	0	0	0	0	0	0	0	1	128254.2	106743.3	1	1198.138	28.05224
465						6	W	109804	110178							YFL012W-A	YFL012W-A||ebi.ac.uk:Database:sgd;A_06_P2838||www.chem.agilent.com:Database:agp		A_06_P2838	1082878	OLIGO	7.620000012	.752592592	37	5	1	465			817	119	1	.5227626551	1	1	0	0	0	0	0	0	0	0	0	37.65277	33.48969	1	5.555365	27.31136
466					SFH5	10	W	145078	145962	phospholipid transport	phosphatidylinositol transporter activity					YJL145W	YJL145W||ebi.ac.uk:Database:sgd;A_06_P4166||www.chem.agilent.com:Database:agp		A_06_P4166	1083740	OLIGO	7.831666679	.752592592	38	5	1	466			837	119	1	.04993328581	1	1	0	0	0	0	0	0	0	0	1	3612.193	2912.028	1	62.43432	27.70229
467						16	C	174755	174342							YPL197C	YPL197C||ebi.ac.uk:Database:sgd;A_06_P6957||www.chem.agilent.com:Database:agp		A_06_P6957	1086650	OLIGO	8.043333346	.752592592	39	5	1	467			859	118	1	.06439251887	1	1	0	0	0	0	0	0	0	0	1	417.2583	477.4036	1	11.56545	27.3626
468					AI2	17	W	13818	18830	RNA splicing	RNA binding*					Q0055	Q0055||ebi.ac.uk:Database:sgd;A_06_P1005||www.chem.agilent.com:Database:agp		A_06_P1005	1086621	OLIGO	8.255000013	.752592592	40	5	1	468			880	119	1	.0534625868	1	1	0	0	0	0	0	0	0	0	0	2815.957	1540.227	1	46.84055	27.39273
469					SLG1	15	C	342414	341278	cell wall organization and biogenesis*	transmembrane receptor activity					YOR008C	YOR008C||ebi.ac.uk:Database:sgd;A_06_P6368||www.chem.agilent.com:Database:agp		A_06_P6368	1086095	OLIGO	8.46666668	.752592592	41	5	1	469			900	119	1	.05107255258	1	1	0	0	0	0	0	0	0	0	0	4060.941	2714.194	1	49.64904	27.66917
470						12	W	722980	723306							YLR296W	YLR296W||ebi.ac.uk:Database:sgd;A_06_P5112||www.chem.agilent.com:Database:agp		A_06_P5112	1085719	OLIGO	8.678333347	.752592592	42	5	1	470			922	119	1	.5125064564	1	1	0	0	0	0	0	0	0	0	0	38.40118	34.17721	1	5.734037	27.2342
471					WTM1	15	W	770800	772113	regulation of meiosis	transcription corepressor activity					YOR230W	YOR230W||ebi.ac.uk:Database:sgd;A_06_P6592||www.chem.agilent.com:Database:agp		A_06_P6592	1086431	OLIGO	8.890000014	.752592592	43	5	1	471			943	119	1	.04988433319	1	1	0	0	0	0	0	0	0	0	1	14469.38	11071.97	1	134.2988	27.85921
472						10	W	245508	246161	biological process unknown	molecular function unknown					YJL097W	YJL097W||ebi.ac.uk:Database:sgd;A_06_P4119||www.chem.agilent.com:Database:agp		A_06_P4119	1086356	OLIGO	9.101666681	.752592592	44	5	1	472			964	119	1	.05347501683	1	1	0	0	0	0	0	0	0	0	0	1124.214	839.7259	1	16.02551	27.9375
473					FUN12	1	W	76428	79436	translational initiation	GTPase activity*					YAL035W	YAL035W||ebi.ac.uk:Database:sgd;A_06_P1059||www.chem.agilent.com:Database:agp		A_06_P1059	1081880	OLIGO	9.313333348	.752592592	45	5	1	473			986	118	1	.04983261475	1	1	0	0	0	0	0	0	0	0	1	8953.652	6963.525	1	107.7108	27.63139
474					HSL1	11	W	248566	253122	protein amino acid phosphorylation*	protein kinase activity					YKL101W	YKL101W||ebi.ac.uk:Database:sgd;A_06_P4512||www.chem.agilent.com:Database:agp		A_06_P4512	1082807	OLIGO	9.525000015	.752592592	46	5	1	474			1007	119	1	.0509021812	1	1	0	0	0	0	0	0	0	0	0	2180.38	1639.597	1	45.01222	26.86415
475																	(+)E1A_r60_1||AgilentControlDB;E1A_r60_1||AgilentControlDB		(+)E1A_R60_1	1545263	CONTROL	9.736666682	.752592592	47	5	1	475			1028	119	1	.3611391221	1	1	0	0	0	0	0	0	0	0	0	54.66312	48.81916	1	7.101462	27.5
476					VTI1	13	C	659197	658544	vesicle fusion*	v-SNARE activity					YMR197C	YMR197C||ebi.ac.uk:Database:sgd;A_06_P5636||www.chem.agilent.com:Database:agp		A_06_P5636	1085228	OLIGO	9.948333349	.752592592	48	5	1	476			1049	119	1	.05171390023	1	1	0	0	0	0	0	0	0	0	0	1453.967	1147.987	1	29.43679	27.61654
477					ARO4	2	C	717989	716877	aromatic amino acid family biosynthesis	3-deoxy-7-phosphoheptulonate synthase activity					YBR249C	YBR249C||ebi.ac.uk:Database:sgd;A_06_P1503||www.chem.agilent.com:Database:agp		A_06_P1503	1085150	OLIGO	10.160000016	.752592592	49	5	1	477			1070	118	1	.04922084405	1	1	0	0	0	0	0	0	0	0	1	19335.7	17739.75	1	254.4297	27.57303
478						13	C	594472	593366	transport	transporter activity					YMR166C	YMR166C||ebi.ac.uk:Database:sgd;A_06_P5601||www.chem.agilent.com:Database:agp		A_06_P5601	1085264	OLIGO	10.371666683	.752592592	50	5	1	478			1092	119	1	.05382159922	1	1	0	0	0	0	0	0	0	0	0	797.0918	941.0523	1	13.98462	27.17625
479					ATG22	3	C	56527	54941	protein-vacuolar targeting*	molecular function unknown					YCL038C	YCL038C||ebi.ac.uk:Database:sgd;A_06_P1590||www.chem.agilent.com:Database:agp		A_06_P1590	1081307	OLIGO	10.58333335	.752592592	51	5	1	479			1113	119	1	.05060722455	1	1	0	0	0	0	0	0	0	0	0	2165.762	1713.741	1	31.91597	27.70545
480					VHT1	7	C	619862	618081	biotin transport	biotin transporter activity					YGR065C	YGR065C||ebi.ac.uk:Database:sgd;A_06_P3285||www.chem.agilent.com:Database:agp		A_06_P3285	1085539	OLIGO	10.795000017	.752592592	52	5	1	480			1134	119	1	.05377469584	1	1	0	0	0	0	0	0	0	0	0	3766.724	1957.557	1	53.25237	27.125
481						15	C	281498	280272	biological process unknown	molecular function unknown					YOL022C	YOL022C||ebi.ac.uk:Database:sgd;A_06_P6213||www.chem.agilent.com:Database:agp		A_06_P6213	1086782	OLIGO	11.006666684	.752592592	53	5	1	481			1155	118	1	.05037779655	1	1	0	0	0	0	0	0	0	0	0	2370.818	3131.348	1	40.40191	27.44981
482						15	C	897073	896693							YOR309C	YOR309C||ebi.ac.uk:Database:sgd;A_06_P6672||www.chem.agilent.com:Database:agp		A_06_P6672	1083807	OLIGO	11.218333351	.752592592	54	5	1	482			1176	119	1	.04989987715	1	1	0	0	0	0	0	0	0	0	1	5570.927	7214.896	1	96.08064	26.85283
483					SUB2	4	W	305237	306577	nuclear mRNA splicing, via spliceosome*	protein binding*					YDL084W	YDL084W||ebi.ac.uk:Database:sgd;A_06_P1813||www.chem.agilent.com:Database:agp		A_06_P1813	1084324	OLIGO	11.430000018	.752592592	55	5	1	483			1197	119	1	.04976455204	1	1	0	0	0	0	0	0	0	0	1	24646.05	19246.02	1	396.466	26.88433
484					NOP14	4	C	190587	188155	processing of 20S pre-rRNA	snoRNA binding					YDL148C	YDL148C||ebi.ac.uk:Database:sgd;A_06_P1881||www.chem.agilent.com:Database:agp		A_06_P1881	1083134	OLIGO	11.641666685	.752592592	56	5	1	484			1218	119	1	.05261459248	1	1	0	0	0	0	0	0	0	0	1	1076.998	942.8046	1	19.71784	27.34783
485					HCA4	10	W	383753	386065	35S primary transcript processing	ATP-dependent RNA helicase activity					YJL033W	YJL033W||ebi.ac.uk:Database:sgd;A_06_P4054||www.chem.agilent.com:Database:agp		A_06_P4054	1083310	OLIGO	11.853333352	.752592592	57	5	1	485			1240	119	1	.05029805503	1	1	0	0	0	0	0	0	0	0	1	1785.46	2083.039	1	34.55007	27.7037
486						10	C	6130	466	biological process unknown	helicase activity					YJL225C	YJL225C||ebi.ac.uk:Database:sgd;A_06_P4246||www.chem.agilent.com:Database:agp		A_06_P4246	1085531	OLIGO	12.065000019	.752592592	58	5	1	486			1261	119	1	.04938941668	1	1	0	0	0	0	0	0	0	0	1	22754.75	26599.29	1	266.28	27.13636
487					GLT1	4	C	155641	149204	glutamate biosynthesis	glutamate synthase (NADH) activity					YDL171C	YDL171C||ebi.ac.uk:Database:sgd;A_06_P1905||www.chem.agilent.com:Database:agp		A_06_P1905	1085462	OLIGO	12.276666686	.752592592	59	5	1	487			1282	119	1	.05694022799	1	1	0	0	0	0	0	0	0	0	1	35302.74	14305.33	1	509.2759	27.20446
488																	(+)E1A_r60_a104||AgilentControlDB;E1A_r60_a104||AgilentControlDB		(+)E1A_R60_A104	1545260	CONTROL	12.488333353	.752592592	60	5	1	488			1303	120	1	.4936239759	1	1	0	0	0	0	0	0	0	0	0	44.20696	31.78652	1	5.94042	27.5448
489					PTP3	5	C	311195	308409	protein amino acid dephosphorylation*	protein tyrosine phosphatase activity					YER075C	YER075C||ebi.ac.uk:Database:sgd;A_06_P2706||www.chem.agilent.com:Database:agp		A_06_P2706	1085688	OLIGO	12.70000002	.752592592	61	5	1	489			1324	119	1	.05103519617	1	1	0	0	0	0	0	0	0	0	1	1332.932	1348.517	1	21.47691	27.25926
490						16	W	713273	715939	biological process unknown	molecular function unknown					YPR089W	YPR089W||ebi.ac.uk:Database:sgd;A_06_P7136||www.chem.agilent.com:Database:agp		A_06_P7136	1082844	OLIGO	12.911666687	.752592592	62	5	1	490			1345	119	1	.1730264364	1	1	0	0	0	0	0	0	0	0	1	121.7538	101.8828	1	6.302588	27.00758
491						12	W	641959	642264							YLR252W	YLR252W||ebi.ac.uk:Database:sgd;A_06_P5066||www.chem.agilent.com:Database:agp		A_06_P5066	1084950	OLIGO	13.123333354	.752592592	63	5	1	491			1366	119	1	.05246036454	1	1	0	0	0	0	0	0	0	0	0	1151.54	965.6963	1	19.72391	27.01521
492					YIP4	7	W	123596	124303	vesicle-mediated transport	Rab GTPase binding					YGL198W	YGL198W||ebi.ac.uk:Database:sgd;A_06_P3153||www.chem.agilent.com:Database:agp		A_06_P3153	1085193	OLIGO	13.335000021	.752592592	64	5	1	492			1388	120	1	.05182496003	1	1	0	0	0	0	0	0	0	0	0	3493.538	2172.766	1	49.25241	26.68359
493					MPD2	15	C	154744	153911	protein folding	protein disulfide isomerase activity					YOL088C	YOL088C||ebi.ac.uk:Database:sgd;A_06_P6281||www.chem.agilent.com:Database:agp		A_06_P6281	1085225	OLIGO	13.546666688	.752592592	65	5	1	493			1409	119	1	.05094183401	1	1	0	0	0	0	0	0	0	0	0	1824.03	1452.182	1	30.52221	26.83577
494					HRT3	12	C	337266	336232	ubiquitin-dependent protein catabolism	ubiquitin-protein ligase activity					YLR097C	YLR097C||ebi.ac.uk:Database:sgd;A_06_P4909||www.chem.agilent.com:Database:agp		A_06_P4909	1086752	OLIGO	13.758333355	.752592592	66	5	1	494			1430	120	1	.05545043481	1	1	0	0	0	0	0	0	0	0	1	762.3715	689.1493	1	16.13026	26.6374
495					SPE1	11	W	96762	98162	pantothenate biosynthesis*	ornithine decarboxylase activity					YKL184W	YKL184W||ebi.ac.uk:Database:sgd;A_06_P4597||www.chem.agilent.com:Database:agp		A_06_P4597	1084207	OLIGO	13.970000022	.752592592	67	5	1	495			1451	119	1	.05026245599	1	1	0	0	0	0	0	0	0	0	0	2601.631	2085.055	1	39.81539	26.86182
496					SEC15	7	W	59122	61854	cytokinesis*	protein binding					YGL233W	YGL233W||ebi.ac.uk:Database:sgd;A_06_P3189||www.chem.agilent.com:Database:agp		A_06_P3189	1080662	OLIGO	14.181666689	.752592592	68	5	1	496			1472	119	1	.04951428825	1	1	0	0	0	0	0	0	0	0	1	3021.947	3022.552	1	45.05728	26.83525
497						5	C	7553	7230	biological process unknown	molecular function unknown					YEL073C	YEL073C||ebi.ac.uk:Database:sgd;A_06_P2615||www.chem.agilent.com:Database:agp		A_06_P2615	1086463	OLIGO	14.393333356	.752592592	69	5	1	497			1493	119	1	.1239240003	1	1	0	0	0	0	0	0	0	0	1	180.4731	146.3491	1	7.507548	26.84091
498					ADO1	10	W	623494	624516	purine base metabolism	adenosine kinase activity					YJR105W	YJR105W||ebi.ac.uk:Database:sgd;A_06_P4348||www.chem.agilent.com:Database:agp		A_06_P4348	1084911	OLIGO	14.605000023	.752592592	70	5	1	498			1515	120	1	.05063775865	1	1	0	0	0	0	0	0	0	0	1	46474.04	31607.05	1	738.1394	26.9542
499					HXT9	10	W	19497	21200	hexose transport	glucose transporter activity*					YJL219W	YJL219W||ebi.ac.uk:Database:sgd;A_06_P4241||www.chem.agilent.com:Database:agp		A_06_P4241	1083394	OLIGO	14.81666669	.752592592	71	5	1	499			1536	119	1	.1138285151	1	1	0	0	0	0	0	0	0	0	1	184.8412	175.4695	1	8.03031	26.6295
500					APA2	4	C	1497758	1496781	nucleotide metabolism	bis(5'-nucleosyl)-tetraphosphatase activity*					YDR530C	YDR530C||ebi.ac.uk:Database:sgd;A_06_P2524||www.chem.agilent.com:Database:agp		A_06_P2524	1085093	OLIGO	15.028333357	.752592592	72	5	1	500			1557	120	1	.05106220474	1	1	0	0	0	0	0	0	0	0	0	1346.871	1638.611	1	21.0856	26.63534
501																	E1A_r60_a135||AgilentControlDB;(+)E1A_r60_a135||AgilentControlDB		(+)E1A_R60_A135	1545258	CONTROL	15.240000024	.752592592	73	5	1	501			1578	119	1	.5292779565	1	1	0	0	0	0	0	0	0	0	0	34.95875	35.21858	1	6.003869	26.5
502						3	C	79295	78948							YCL023C	YCL023C||ebi.ac.uk:Database:sgd;A_06_P1574||www.chem.agilent.com:Database:agp		A_06_P1574	1084038	OLIGO	15.451666691	.752592592	74	5	1	502			1599	119	1	.4195531203	1	1	0	0	0	0	0	0	0	0	1	60.91001	31.24122	1	7.204078	26.18868
503					ASP3-2	12	C	474058	472970	asparagine catabolism*	asparaginase activity					YLR157C	YLR157C||ebi.ac.uk:Database:sgd;A_06_P4971||www.chem.agilent.com:Database:agp		A_06_P4971	1086847	OLIGO	15.663333358	.752592592	75	5	1	503			1620	119	1	.05940418494	1	1	0	0	0	0	0	0	0	0	1	87730.07	30789.13	1	1428.573	26.48106
504					SUI2	10	W	450934	451848	translational initiation	translation initiation factor activity					YJR007W	YJR007W||ebi.ac.uk:Database:sgd;A_06_P4253||www.chem.agilent.com:Database:agp		A_06_P4253	1086852	OLIGO	15.875000025	.752592592	76	5	1	504			1642	119	1	.04950190022	1	1	0	0	0	0	0	0	0	0	1	3159.246	3065.759	1	47.83704	26.65056
505					SAH1	5	C	237118	235769	methionine metabolism*	adenosylhomocysteinase activity					YER043C	YER043C||ebi.ac.uk:Database:sgd;A_06_P2668||www.chem.agilent.com:Database:agp		A_06_P2668	1081275	OLIGO	16.086666692	.752592592	77	5	1	505			1663	118	1	.05103434703	1	1	0	0	0	0	0	0	0	0	1	40491.08	26230.75	1	536.6119	26.67176
506						16	C	656549	655137	biological process unknown	molecular function unknown					YPR045C	YPR045C||ebi.ac.uk:Database:sgd;A_06_P7091||www.chem.agilent.com:Database:agp		A_06_P7091	1081451	OLIGO	16.298333359	.752592592	78	5	1	506			1684	120	1	.05120963986	1	1	0	0	0	0	0	0	0	0	0	1365.503	1768.837	1	27.77062	26.92391
507					MAK5	2	W	528311	530632	rRNA processing*	ATP-dependent RNA helicase activity					YBR142W	YBR142W||ebi.ac.uk:Database:sgd;A_06_P1394||www.chem.agilent.com:Database:agp		A_06_P1394	1082080	OLIGO	16.510000026	.752592592	79	5	1	507			1705	119	1	.05451802679	1	1	0	0	0	0	0	0	0	0	0	773.6964	1203.384	1	17.76126	26.60741
508					RED1	12	W	670342	672825	synaptonemal complex formation	molecular function unknown					YLR263W	YLR263W||ebi.ac.uk:Database:sgd;A_06_P5078||www.chem.agilent.com:Database:agp		A_06_P5078	1083060	OLIGO	16.721666693	.752592592	80	5	1	508			1726	120	1	.07669957804	1	1	0	0	0	0	0	0	0	0	1	342.3016	289.6633	1	11.82536	26.38148
509					FUN26	1	C	110431	108878	nucleoside transport	nucleoside transporter activity					YAL022C	YAL022C||ebi.ac.uk:Database:sgd;A_06_P1044||www.chem.agilent.com:Database:agp		A_06_P1044	1083405	OLIGO	16.93333336	.752592592	81	5	1	509			1747	119	1	.0501503247	1	1	0	0	0	0	0	0	0	0	1	5550.408	4143.322	1	86.57906	26.45185
510					MTR3	7	C	806026	805274	35S primary transcript processing*	3'-5'-exoribonuclease activity					YGR158C	YGR158C||ebi.ac.uk:Database:sgd;A_06_P3379||www.chem.agilent.com:Database:agp		A_06_P3379	1086769	OLIGO	17.145000027	.752592592	82	5	1	510			1768	120	1	.05964462765	1	1	0	0	0	0	0	0	0	0	0	505.1681	609.0922	1	12.47818	26.48727
511						16	C	84196	82625	biological process unknown	molecular function unknown					YPL247C	YPL247C||ebi.ac.uk:Database:sgd;A_06_P7007||www.chem.agilent.com:Database:agp		A_06_P7007	1084787	OLIGO	17.356666694	.752592592	83	5	1	511			1790	119	1	.05242066778	1	1	0	0	0	0	0	0	0	0	0	1154.183	972.0587	1	25.54116	26.20818
512					RSC4	11	W	451844	453721	chromatin remodeling	molecular function unknown					YKR008W	YKR008W||ebi.ac.uk:Database:sgd;A_06_P4645||www.chem.agilent.com:Database:agp		A_06_P4645	1080980	OLIGO	17.568333361	.752592592	84	5	1	512			1811	120	1	.05530445758	1	1	0	0	0	0	0	0	0	0	0	909.7523	673.8249	1	17.14775	26.03261
513						3	W	252841	254169	biological process unknown	phosphoprotein phosphatase activity					YCR079W	YCR079W||ebi.ac.uk:Database:sgd;A_06_P1699||www.chem.agilent.com:Database:agp		A_06_P1699	1080637	OLIGO	17.780000028	.752592592	85	5	1	513			1832	119	1	.05634079274	1	1	0	0	0	0	0	0	0	0	0	1301.562	696.434	1	26.81162	25.98897
514																	(+)E1A_r60_1||AgilentControlDB;E1A_r60_1||AgilentControlDB		(+)E1A_R60_1	1545263	CONTROL	17.991666695	.752592592	86	5	1	514			1853	120	1	.2471769254	1	1	0	0	0	0	0	0	0	0	0	90.34174	63.99284	1	7.23445	25.86879
515					BTS1	16	C	423889	422882	terpenoid biosynthesis	farnesyltranstransferase activity					YPL069C	YPL069C||ebi.ac.uk:Database:sgd;A_06_P6828||www.chem.agilent.com:Database:agp		A_06_P6828	1085663	OLIGO	18.203333362	.752592592	87	5	1	515			1874	119	1	.08036167872	1	1	0	0	0	0	0	1	0	0	1	318.8817	266.5891	1	9.71729	26.23132
516						8	W	69704	70066	biological process unknown	molecular function unknown					YHL018W	YHL018W||ebi.ac.uk:Database:sgd;A_06_P3536||www.chem.agilent.com:Database:agp		A_06_P3536	1081465	OLIGO	18.415000029	.752592592	88	5	1	516			1896	120	1	.3526995818	1	1	0	0	0	0	0	1	0	0	0	76.8683	34.79738	1	8.375632	26.09524
517					RBA50	4	W	1491084	1492403	transcription from RNA polymerase II promoter	DNA-directed RNA polymerase activity					YDR527W	YDR527W||ebi.ac.uk:Database:sgd;A_06_P2521||www.chem.agilent.com:Database:agp		A_06_P2521	1084582	OLIGO	18.626666696	.752592592	89	5	1	517			1917	119	1	.05435677801	1	1	0	0	0	0	0	0	0	0	0	745.0318	968.356	1	14.08404	25.91209
518					NUP42	4	C	844856	843564	mRNA-nucleus export*	structural molecule activity					YDR192C	YDR192C||ebi.ac.uk:Database:sgd;A_06_P2181||www.chem.agilent.com:Database:agp		A_06_P2181	1083509	OLIGO	18.838333363	.752592592	90	5	1	518			1938	120	1	.05801111199	1	1	0	0	0	0	0	0	0	0	1	634.1801	572.7196	1	14.91593	26.01434
519					ODC1	16	C	299502	298570	mitochondrial transport	intracellular transporter activity*					YPL134C	YPL134C||ebi.ac.uk:Database:sgd;A_06_P6893||www.chem.agilent.com:Database:agp		A_06_P6893	1082322	OLIGO	19.05000003	.752592592	91	5	1	519			1959	119	1	.0500187238	1	1	0	0	0	0	0	0	0	0	1	2026.118	2275.583	1	40.29985	25.82657
520						15	W	181056	181454							YOL079W	YOL079W||ebi.ac.uk:Database:sgd;A_06_P6271||www.chem.agilent.com:Database:agp		A_06_P6271	1080753	OLIGO	19.261666697	.752592592	92	5	1	520			1980	120	1	.4691689589	1	1	0	0	0	0	0	0	0	0	1	45.0922	34.6412	1	6.056626	25.77695
521						4	C	407203	405341	biological process unknown	protein kinase activity					YDL025C	YDL025C||ebi.ac.uk:Database:sgd;A_06_P1753||www.chem.agilent.com:Database:agp		A_06_P1753	1084867	OLIGO	19.473333364	.752592592	93	5	1	521			2001	119	1	.05212467387	1	1	0	0	0	0	0	0	0	0	1	1086.372	1044.775	1	19.66218	25.528
522					PET8	14	C	625829	624975	S-adenosylmethionine transport	S-adenosylmethionine transporter activity					YNL003C	YNL003C||ebi.ac.uk:Database:sgd;A_06_P5774||www.chem.agilent.com:Database:agp		A_06_P5774	1082821	OLIGO	19.685000031	.752592592	94	5	1	522			2023	120	1	.05312694977	1	1	0	0	0	0	0	0	0	0	0	2037.549	1211.304	1	29.16858	25.98507
523						12	C	712060	710993	biological process unknown	molecular function unknown					YLR287C	YLR287C||ebi.ac.uk:Database:sgd;A_06_P5102||www.chem.agilent.com:Database:agp		A_06_P5102	1082957	OLIGO	19.896666698	.752592592	95	5	1	523			2044	119	1	.05319689817	1	1	0	0	0	0	0	0	0	0	0	863.7039	1011.504	1	15.119	25.82642
524					SFT2	2	W	24098	24745	Golgi to endosome transport	molecular function unknown					YBL102W	YBL102W||ebi.ac.uk:Database:sgd;A_06_P1235||www.chem.agilent.com:Database:agp		A_06_P1235	1086403	OLIGO	20.108333365	.752592592	96	5	1	524			2065	119	1	.04956669716	1	1	0	0	0	0	0	0	0	0	1	8833.238	7285.712	1	155.3552	25.75185
525					PEX6	14	C	22633	19541	peroxisome organization and biogenesis	ATPase activity					YNL329C	YNL329C||ebi.ac.uk:Database:sgd;A_06_P6101||www.chem.agilent.com:Database:agp		A_06_P6101	1084808	OLIGO	20.320000032	.752592592	97	5	1	525			2086	119	1	.05334121462	1	1	0	0	0	0	0	0	0	0	1	865.6771	925.6854	1	22.1675	25.84387
526					PSO2	13	C	544962	542977	DNA repair*	damaged DNA binding*					YMR137C	YMR137C||ebi.ac.uk:Database:sgd;A_06_P5569||www.chem.agilent.com:Database:agp		A_06_P5569	1083835	OLIGO	20.531666699	.752592592	98	5	1	526			2107	120	1	.06354217416	1	1	0	0	0	0	0	0	0	0	0	392.6276	589.656	1	11.35234	25.80597
527																	E1A_r60_n9||AgilentControlDB;(+)E1A_r60_n9||AgilentControlDB		(+)E1A_R60_N9	1545267	CONTROL	20.743333366	.752592592	99	5	1	527			2129	118	1	.4785634985	1	1	0	0	0	0	0	0	0	0	0	45.72608	32.7081	1	6.884292	26.02247
528						15	C	408788	408357							YOR041C	YOR041C||ebi.ac.uk:Database:sgd;A_06_P6403||www.chem.agilent.com:Database:agp		A_06_P6403	1081479	OLIGO	20.955000033	.752592592	100	5	1	528			2150	120	1	.5568853381	1	1	0	0	0	0	0	0	0	0	0	24.75827	43.73752	1	4.156511	25.73913
529						16	W	527544	528689	biological process unknown	molecular function unknown					YPL014W	YPL014W||ebi.ac.uk:Database:sgd;A_06_P6773||www.chem.agilent.com:Database:agp		A_06_P6773	1083607	OLIGO	21.1666667	.752592592	101	5	1	529			2170	120	1	.2819801056	1	1	0	0	0	0	0	0	0	0	1	75.51612	58.45925	1	6.73659	25.73606
530					CSM4	16	W	171483	171953	meiotic chromosome segregation	molecular function unknown					YPL200W	YPL200W||ebi.ac.uk:Database:sgd;A_06_P6960||www.chem.agilent.com:Database:agp		A_06_P6960	1085344	OLIGO	21.378333367	.752592592	102	5	1	530			2192	119	1	.5405804834	1	1	0	0	0	0	0	0	0	0	0	34.81236	33.88924	1	6.500218	25.58824
531					RPC31	14	C	348521	347766	transcription from RNA polymerase III promoter	DNA-directed RNA polymerase activity					YNL151C	YNL151C||ebi.ac.uk:Database:sgd;A_06_P5922||www.chem.agilent.com:Database:agp		A_06_P5922	1085272	OLIGO	21.590000034	.752592592	103	5	1	531			2213	119	1	.05347515935	1	1	0	0	0	0	0	0	0	0	0	830.8159	1050.176	1	17.66867	25.64945
532					SDL1	9	W	29416	30048	biological process unknown*	molecular function unknown*					YIL167W	YIL167W||ebi.ac.uk:Database:sgd;A_06_P3966||www.chem.agilent.com:Database:agp		A_06_P3966	1082254	OLIGO	21.801666701	.752592592	104	5	1	532			2234	120	1	.09645198773	1	1	0	0	0	0	0	0	0	0	1	205.5928	241.8304	1	11.24957	25.88603
533					RPF1	8	W	281496	282383	ribosomal large subunit assembly and maintenance*	rRNA primary transcript binding					YHR088W	YHR088W||ebi.ac.uk:Database:sgd;A_06_P3663||www.chem.agilent.com:Database:agp		A_06_P3663	1084706	OLIGO	22.013333368	.752592592	105	5	1	533			2255	119	1	.0539711937	1	1	0	0	0	0	0	0	0	0	0	1009.47	1758.644	1	16.81797	25.81716
534					DUS3	12	C	924447	922618	tRNA modification	tRNA dihydrouridine synthase activity					YLR401C	YLR401C||ebi.ac.uk:Database:sgd;A_06_P5219||www.chem.agilent.com:Database:agp		A_06_P5219	1081407	OLIGO	22.225000035	.752592592	106	5	1	534			2276	120	1	.05527001409	1	1	0	0	0	0	0	0	0	0	0	680.6	978.2699	1	14.97049	25.43609
535						9	C	34077	33718	biological process unknown	molecular function unknown					YIL165C	YIL165C||ebi.ac.uk:Database:sgd;A_06_P3964||www.chem.agilent.com:Database:agp		A_06_P3964	1083354	OLIGO	22.436666702	.752592592	107	5	1	535			2298	120	1	.04946027977	1	1	0	0	0	0	0	0	0	0	1	5255.27	4598.01	1	53.83252	24.31502
536						9	C	9155	8793	biological process unknown	molecular function unknown					YIL176C	YIL176C||ebi.ac.uk:Database:sgd;A_06_P3975||www.chem.agilent.com:Database:agp		A_06_P3975	1080636	OLIGO	0	.94074074	1	6	1	536			54	137	1	.05358612494	1	1	0	0	0	0	0	0	0	0	1	828.0434	929.3359	1	16.40477	25.52015
537					PRE8	13	C	86739	85987	ubiquitin-dependent protein catabolism	endopeptidase activity					YML092C	YML092C||ebi.ac.uk:Database:sgd;A_06_P5382||www.chem.agilent.com:Database:agp		A_06_P5382	1085559	OLIGO	.211666667	.94074074	2	6	1	537			75	138	1	.05019503581	1	1	0	0	0	0	0	0	0	0	1	1786.721	1937.177	1	30.07565	26.28358
538					GPM1	11	C	164390	163647	glycolysis*	phosphoglycerate mutase activity					YKL152C	YKL152C||ebi.ac.uk:Database:sgd;A_06_P4564||www.chem.agilent.com:Database:agp		A_06_P4564	1084906	OLIGO	.423333334	.94074074	3	6	1	538			96	137	1	.04914701568	1	1	0	0	0	0	0	1	0	0	1	267358.5	276733.3	1	2408.205	26.5
539					SDH2	12	C	53930	53130	tricarboxylic acid cycle*	succinate dehydrogenase (ubiquinone) activity					YLL041C	YLL041C||ebi.ac.uk:Database:sgd;A_06_P4786||www.chem.agilent.com:Database:agp		A_06_P4786	1081164	OLIGO	.635000001	.94074074	4	6	1	539			118	138	1	.05038959992	1	1	0	0	0	0	0	0	0	0	0	2701.279	3645.139	1	43.4184	26.83774
540					IML2	10	W	281101	283296	biological process unknown	molecular function unknown					YJL082W	YJL082W||ebi.ac.uk:Database:sgd;A_06_P4104||www.chem.agilent.com:Database:agp		A_06_P4104	1083239	OLIGO	.846666668	.94074074	5	6	1	540			139	138	1	.05398696464	1	1	0	0	0	0	0	0	0	0	0	2312.061	1246.465	1	34.97144	26.71025
541					JEN1	11	W	22234	24084	lactate transport	lactate transporter activity					YKL217W	YKL217W||ebi.ac.uk:Database:sgd;A_06_P4629||www.chem.agilent.com:Database:agp		A_06_P4629	1080916	OLIGO	1.058333335	.94074074	6	6	1	541			160	138	1	.07697177471	1	1	0	0	0	0	0	0	0	0	0	406.1914	251.816	1	9.911005	26.47407
542					MSS4	4	W	868219	870558	sporulation (sensu Fungi)*	1-phosphatidylinositol-4-phosphate 5-kinase activity					YDR208W	YDR208W||ebi.ac.uk:Database:sgd;A_06_P2197||www.chem.agilent.com:Database:agp		A_06_P2197	1082214	OLIGO	1.270000002	.94074074	7	6	1	542			181	137	1	.05099146125	1	1	0	0	0	0	0	0	0	0	0	1662.03	1373.552	1	25.9677	26.84644
543						10	C	392165	391749	biological process unknown	molecular function unknown					YJL027C	YJL027C||ebi.ac.uk:Database:sgd;A_06_P4048||www.chem.agilent.com:Database:agp		A_06_P4048	1085917	OLIGO	1.481666669	.94074074	8	6	1	543			202	138	1	.574092435	1	1	0	0	0	0	0	0	0	0	0	31.8081	32.85438	1	4.649014	26.68061
544					CTI6	16	W	203420	204940	positive regulation of transcription	transcription factor binding					YPL181W	YPL181W||ebi.ac.uk:Database:sgd;A_06_P6940||www.chem.agilent.com:Database:agp		A_06_P6940	1086719	OLIGO	1.693333336	.94074074	9	6	1	544			224	137	1	.05514584491	1	1	0	0	0	0	0	0	0	0	0	1166.485	723.8943	1	16.62711	26.85992
545					RPS5	10	W	651816	652493	protein biosynthesis	structural constituent of ribosome					YJR123W	YJR123W||ebi.ac.uk:Database:sgd;A_06_P4366||www.chem.agilent.com:Database:agp		A_06_P4366	1086619	OLIGO	1.905000003	.94074074	10	6	1	545			245	138	1	.04913548189	1	1	0	0	0	0	0	0	0	0	1	130680.6	131567	1	1529.513	27.13534
546					FMT1	2	W	202059	203264	translational initiation*	methionyl-tRNA formyltransferase activity					YBL013W	YBL013W||ebi.ac.uk:Database:sgd;A_06_P1142||www.chem.agilent.com:Database:agp		A_06_P1142	1086079	OLIGO	2.11666667	.94074074	11	6	1	546			266	137	1	.5221335877	1	1	0	0	0	0	0	0	0	0	1	39.12144	32.25031	1	5.389285	26.97026
547						4	W	622107	624716	membrane organization and biogenesis	molecular function unknown					YDR089W	YDR089W||ebi.ac.uk:Database:sgd;A_06_P2077||www.chem.agilent.com:Database:agp		A_06_P2077	1083869	OLIGO	2.328333337	.94074074	12	6	1	547			287	138	1	.05459136641	1	1	0	0	0	0	0	0	0	0	0	2948.319	1469.368	1	71.11995	26.89057
548																	EQC||AgilentControlDB;(+)eQC-39||AgilentControlDB		(+)EQC-39	1081607	CONTROL	2.540000004	.94074074	13	6	1	548			308	137	1	.5064811117	1	1	0	0	0	0	0	0	0	0	0	27.35751	47.97327	1	3.42708	26.55805
549					KAP95	12	C	826412	823827	protein-nucleus import	protein carrier activity					YLR347C	YLR347C||ebi.ac.uk:Database:sgd;A_06_P5164||www.chem.agilent.com:Database:agp		A_06_P5164	1085842	OLIGO	2.751666671	.94074074	14	6	1	549			329	138	1	.05113282807	1	1	0	0	0	0	0	1	0	0	1	1522.105	1292.462	1	28.64889	26.91635
550					SOR2	4	C	9756	8683	hexose metabolism	oxidoreductase activity, acting on the CH-OH group of donors, NAD or NADP as acceptor					YDL246C	YDL246C||ebi.ac.uk:Database:sgd;A_06_P1982||www.chem.agilent.com:Database:agp		A_06_P1982	1086128	OLIGO	2.963333338	.94074074	15	6	1	550			350	137	1	.5126865851	1	1	0	0	0	0	0	1	0	0	0	28.74295	44.95894	1	4.070247	27.0293
551						8	C	32754	27976	transport	ATPase activity, coupled to transmembrane movement of substances					YHL035C	YHL035C||ebi.ac.uk:Database:sgd;A_06_P3553||www.chem.agilent.com:Database:agp		A_06_P3553	1084312	OLIGO	3.175000005	.94074074	16	6	1	551			372	138	1	.07217776657	1	1	0	0	0	0	0	0	0	0	0	3799.777	752.8023	1	55.88288	27.25
552					CTM1	8	W	330312	332069	protein modification	[cytochrome c]-lysine N-methyltransferase activity					YHR109W	YHR109W||ebi.ac.uk:Database:sgd;A_06_P3684||www.chem.agilent.com:Database:agp		A_06_P3684	1086838	OLIGO	3.386666672	.94074074	17	6	1	552			393	137	1	.06675383373	1	1	0	0	0	0	0	0	0	0	1	439.4394	383.9496	1	11.482	26.79336
553					RPL3	15	W	444687	445850	protein biosynthesis*	structural constituent of ribosome					YOR063W	YOR063W||ebi.ac.uk:Database:sgd;A_06_P6425||www.chem.agilent.com:Database:agp		A_06_P6425	1082105	OLIGO	3.598333339	.94074074	18	6	1	553			414	138	1	.04968442495	1	1	0	0	0	0	0	0	0	0	1	42557.53	53669.12	1	435.5907	26.55872
554					PRP40	11	W	417953	419704	nuclear mRNA splicing, via spliceosome	RNA binding					YKL012W	YKL012W||ebi.ac.uk:Database:sgd;A_06_P4419||www.chem.agilent.com:Database:agp		A_06_P4419	1081004	OLIGO	3.810000006	.94074074	19	6	1	554			435	137	1	.05445804318	1	1	0	0	0	0	0	0	0	0	1	856.2825	747.9804	1	15.68594	26.44622
555					PDC1	12	C	234082	232391	pyruvate metabolism*	pyruvate decarboxylase activity					YLR044C	YLR044C||ebi.ac.uk:Database:sgd;A_06_P4856||www.chem.agilent.com:Database:agp		A_06_P4856	1081771	OLIGO	4.021666673	.94074074	20	6	1	555			457	138	1	.04914027212	1	1	0	0	0	0	0	1	0	0	1	281608	275204.5	1	1176.481	26.80934
556						14	W	38641	39081							YNL319W	YNL319W||ebi.ac.uk:Database:sgd;A_06_P6091||www.chem.agilent.com:Database:agp		A_06_P6091	1083464	OLIGO	4.23333334	.94074074	21	6	1	556			478	137	1	.4619634617	1	1	0	0	0	0	0	0	0	0	1	48.92808	32.70207	1	6.552883	26.6044
557					TLG2	15	C	292074	290881	vesicle fusion	v-SNARE activity*					YOL018C	YOL018C||ebi.ac.uk:Database:sgd;A_06_P6209||www.chem.agilent.com:Database:agp		A_06_P6209	1082419	OLIGO	4.445000007	.94074074	22	6	1	557			499	138	1	.05260960727	1	1	0	0	0	0	0	0	0	0	1	1017.546	959.598	1	20.9145	26.67279
558						11	W	291098	292276	biological process unknown	molecular function unknown					YKL077W	YKL077W||ebi.ac.uk:Database:sgd;A_06_P4487||www.chem.agilent.com:Database:agp		A_06_P4487	1086080	OLIGO	4.656666674	.94074074	23	6	1	558			520	137	1	.04957470459	1	1	0	0	0	0	0	0	0	0	1	3918.593	3427.941	1	64.44536	26.20295
559					REV7	9	C	88716	87979	DNA repair*	zeta DNA polymerase activity					YIL139C	YIL139C||ebi.ac.uk:Database:sgd;A_06_P3938||www.chem.agilent.com:Database:agp		A_06_P3938	1084367	OLIGO	4.868333341	.94074074	24	6	1	559			541	138	1	.06031545479	1	1	0	0	0	0	0	0	0	0	1	535.0106	522.4832	1	13.21261	26.79783
560					SEC27	7	W	249874	252743	ER to Golgi transport*	molecular function unknown					YGL137W	YGL137W||ebi.ac.uk:Database:sgd;A_06_P3092||www.chem.agilent.com:Database:agp		A_06_P3092	1083547	OLIGO	5.080000008	.94074074	25	6	1	560			562	137	1	.04930044912	1	1	0	0	0	0	0	0	0	0	1	4937.832	5216.567	1	54.24002	26.90975
561																	EQC||AgilentControlDB;(+)eQC-39||AgilentControlDB		(+)EQC-39	1081607	CONTROL	5.291666675	.94074074	26	6	1	561			583	138	1	.5475258256	1	1	0	0	0	0	0	0	0	0	0	25.13467	44.56682	1	4.253801	26.82463
562						4	C	943414	941051	biological process unknown	molecular function unknown					YDR239C	YDR239C||ebi.ac.uk:Database:sgd;A_06_P2228||www.chem.agilent.com:Database:agp		A_06_P2228	1083803	OLIGO	5.503333342	.94074074	27	6	1	562			604	137	1	.05594697053	1	1	0	0	0	0	0	0	0	0	1	714.293	672.0334	1	15.26219	26.81387
563					MNL1	8	W	506318	508708	ER-associated protein catabolism	carbohydrate binding					YHR204W	YHR204W||ebi.ac.uk:Database:sgd;A_06_P3782||www.chem.agilent.com:Database:agp		A_06_P3782	1086188	OLIGO	5.715000009	.94074074	28	6	1	563			626	138	1	.05286058683	1	1	0	0	0	0	0	0	0	0	0	1138.341	908.9854	1	21.37258	26.36996
564					ESF2	14	C	724305	723355	35S primary transcript processing	transcription regulator activity					YNR054C	YNR054C||ebi.ac.uk:Database:sgd;A_06_P6167||www.chem.agilent.com:Database:agp		A_06_P6167	1081312	OLIGO	5.926666676	.94074074	29	6	1	564			647	137	1	.05209885142	1	1	0	0	0	0	0	0	0	0	1	1126.509	1035.569	1	19.30326	26.40146
565						7	C	797873	796803	biological process unknown	molecular function unknown					YGR154C	YGR154C||ebi.ac.uk:Database:sgd;A_06_P3375||www.chem.agilent.com:Database:agp		A_06_P3375	1081605	OLIGO	6.138333343	.94074074	30	6	1	565			668	138	1	.0634499262	1	1	0	0	0	0	0	0	0	0	1	494.1073	433.414	1	13.29964	26.73723
566					SAS5	15	C	745281	744535	chromatin silencing at telomere	acetyltransferase activity*					YOR213C	YOR213C||ebi.ac.uk:Database:sgd;A_06_P6575||www.chem.agilent.com:Database:agp		A_06_P6575	1085451	OLIGO	6.35000001	.94074074	31	6	1	566			689	137	1	.05059271539	1	1	0	0	0	0	0	0	0	0	0	1987.572	2637.599	1	32.90472	27.03636
567						7	W	90011	90499							YGL214W	YGL214W||ebi.ac.uk:Database:sgd;A_06_P3169||www.chem.agilent.com:Database:agp		A_06_P3169	1083773	OLIGO	6.561666677	.94074074	32	6	1	567			710	138	1	.4811008966	1	1	0	0	0	0	0	0	0	0	1	36.9197	40.40935	1	6.568954	27.03802
568					REH1	12	C	897672	896374	biological process unknown*	molecular function unknown					YLR387C	YLR387C||ebi.ac.uk:Database:sgd;A_06_P5205||www.chem.agilent.com:Database:agp		A_06_P5205	1083512	OLIGO	6.773333344	.94074074	33	6	1	568			731	137	1	.04960564544	1	1	0	0	0	0	0	0	0	0	1	5075.846	6125.027	1	70.9991	27.0188
569						12	C	541575	540811	biological process unknown	molecular function unknown					YLR194C	YLR194C||ebi.ac.uk:Database:sgd;A_06_P5008||www.chem.agilent.com:Database:agp		A_06_P5008	1086758	OLIGO	6.985000011	.94074074	34	6	1	569			753	138	1	.0499207724	1	1	0	0	0	0	0	0	0	0	1	2122.353	2080.154	1	35.40867	27.6295
570					TRM12	13	W	260221	261609	tRNA methylation	S-adenosylmethionine-dependent methyltransferase activity					YML005W	YML005W||ebi.ac.uk:Database:sgd;A_06_P5291||www.chem.agilent.com:Database:agp		A_06_P5291	1081315	OLIGO	7.196666678	.94074074	35	6	1	570			774	137	1	.0611212716	1	1	0	0	0	0	0	0	0	0	1	478.2236	547.9047	1	12.17102	27.39033
571					AYR1	9	W	126204	127097	phosphatidic acid biosynthesis	acylglycerone-phosphate reductase activity					YIL124W	YIL124W||ebi.ac.uk:Database:sgd;A_06_P3923||www.chem.agilent.com:Database:agp		A_06_P3923	1082318	OLIGO	7.408333345	.94074074	36	6	1	571			795	138	1	.05398727741	1	1	0	0	0	0	0	0	0	0	0	4592.747	2322.887	1	44.93374	27.42029
572					ELF1	11	W	153274	153711	cell growth	molecular function unknown					YKL160W	YKL160W||ebi.ac.uk:Database:sgd;A_06_P4571||www.chem.agilent.com:Database:agp		A_06_P4571	1086077	OLIGO	7.620000012	.94074074	37	6	1	572			816	137	1	.05065486046	1	1	0	0	0	0	0	0	0	0	1	1489.264	1688.88	1	25.69075	27.6203
573					HXT17	14	W	772655	774349	hexose transport	glucose transporter activity*					YNR072W	YNR072W||ebi.ac.uk:Database:sgd;A_06_P6185||www.chem.agilent.com:Database:agp		A_06_P6185	1082728	OLIGO	7.831666679	.94074074	38	6	1	573			838	138	1	.06093913223	1	1	0	0	0	0	0	0	0	0	0	671.2887	444.9092	1	13.16467	27.64815
574																	EQC||AgilentControlDB;(+)eQC-39||AgilentControlDB		(+)EQC-39	1081607	CONTROL	8.043333346	.94074074	39	6	1	574			859	137	1	.5251289322	1	1	0	0	0	0	0	0	0	0	0	32.20199	38.74011	1	4.574271	27.83394
575						2	C	785069	784698							YBR292C	YBR292C||ebi.ac.uk:Database:sgd;A_06_P1546||www.chem.agilent.com:Database:agp		A_06_P1546	1081781	OLIGO	8.255000013	.94074074	40	6	1	575			880	138	1	.1132993984	1	1	0	0	0	0	0	0	0	0	1	169.4307	193.6763	1	8.158441	27.70979
576					RPL42B	8	C	382753	381992	protein biosynthesis	structural constituent of ribosome					YHR141C	YHR141C||ebi.ac.uk:Database:sgd;A_06_P3718||www.chem.agilent.com:Database:agp		A_06_P3718	1080839	OLIGO	8.46666668	.94074074	41	6	1	576			900	138	1	.04936689467	1	1	0	0	0	0	0	0	0	0	1	49099.17	57064.03	1	658.5808	27.74231
577						12	C	704962	704495	biological process unknown	molecular function unknown					YLR281C	YLR281C||ebi.ac.uk:Database:sgd;A_06_P5096||www.chem.agilent.com:Database:agp		A_06_P5096	1084587	OLIGO	8.678333347	.94074074	42	6	1	577			922	138	1	.2016756123	1	1	0	0	0	0	0	0	0	0	1	71.60905	122.7686	1	8.579559	27.44649
578					STF2	7	C	508368	508114	ATP synthesis coupled proton transport*	molecular function unknown					YGR008C	YGR008C||ebi.ac.uk:Database:sgd;A_06_P3228||www.chem.agilent.com:Database:agp		A_06_P3228	1082502	OLIGO	8.890000014	.94074074	43	6	1	578			943	138	1	.05145448197	1	1	0	0	0	0	0	0	0	0	0	2363.652	3667.567	1	40.54452	27.42182
579					GDS1	15	W	1005133	1006701	aerobic respiration	molecular function unknown					YOR355W	YOR355W||ebi.ac.uk:Database:sgd;A_06_P6719||www.chem.agilent.com:Database:agp		A_06_P6719	1080726	OLIGO	9.101666681	.94074074	44	6	1	579			964	138	1	.05020149969	1	1	0	0	0	0	0	0	0	0	1	2977.298	2345.645	1	44.93653	27.87085
580					IPL1	16	C	157592	156489	chromosome segregation*	protein kinase activity					YPL209C	YPL209C||ebi.ac.uk:Database:sgd;A_06_P6969||www.chem.agilent.com:Database:agp		A_06_P6969	1086882	OLIGO	9.313333348	.94074074	45	6	1	580			985	138	1	.09243154573	1	1	0	0	0	0	0	0	0	0	1	240.3931	232.0836	1	10.13924	27.18959
581					UFD4	11	C	425518	421067	protein monoubiquitination*	ubiquitin-protein ligase activity					YKL010C	YKL010C||ebi.ac.uk:Database:sgd;A_06_P4417||www.chem.agilent.com:Database:agp		A_06_P4417	1081321	OLIGO	9.525000015	.94074074	46	6	1	581			1007	138	1	.05017592673	1	1	0	0	0	0	0	0	0	0	1	3030.855	2391.763	1	46.27491	26.85199
582					MDM32	15	W	606514	608475	mitochondrion organization and biogenesis*	molecular function unknown					YOR147W	YOR147W||ebi.ac.uk:Database:sgd;A_06_P6509||www.chem.agilent.com:Database:agp		A_06_P6509	1086211	OLIGO	9.736666682	.94074074	47	6	1	582			1028	137	1	.05312464817	1	1	0	0	0	0	0	0	0	0	0	870.9829	1046.537	1	16.4664	27.04545
583					HHT1	2	W	256329	256739	chromatin assembly or disassembly	DNA binding					YBR010W	YBR010W||ebi.ac.uk:Database:sgd;A_06_P1257||www.chem.agilent.com:Database:agp		A_06_P1257	1084122	OLIGO	9.948333349	.94074074	48	6	1	583			1049	139	1	.05160781943	1	1	0	0	0	0	0	0	0	0	1	31144.81	18956.69	1	372.5342	27.52652
584					PSE1	13	C	892220	888951	mRNA-nucleus export	protein carrier activity					YMR308C	YMR308C||ebi.ac.uk:Database:sgd;A_06_P5751||www.chem.agilent.com:Database:agp		A_06_P5751	1083275	OLIGO	10.160000016	.94074074	49	6	1	584			1070	137	1	.05005801455	1	1	0	0	0	0	0	0	0	0	1	3184.481	2550.25	1	42.04608	27.48921
585					RPS18B	13	C	223828	222987	protein biosynthesis	structural constituent of ribosome					YML026C	YML026C||ebi.ac.uk:Database:sgd;A_06_P5316||www.chem.agilent.com:Database:agp		A_06_P5316	1084595	OLIGO	10.371666683	.94074074	50	6	1	585			1091	138	1	.049294831	1	1	0	0	0	0	0	0	0	0	1	10916.79	12241.41	1	140.2769	27.06977
586						4	W	135897	137540	biological process unknown	molecular function unknown					YDL180W	YDL180W||ebi.ac.uk:Database:sgd;A_06_P1914||www.chem.agilent.com:Database:agp		A_06_P1914	1086702	OLIGO	10.58333335	.94074074	51	6	1	586			1112	138	1	.05207630709	1	1	0	0	0	0	0	0	0	0	0	1446.425	1087.629	1	17.26289	27.69925
587																	EQC||AgilentControlDB;(+)eQC-39||AgilentControlDB		(+)EQC-39	1081607	CONTROL	10.795000017	.94074074	52	6	1	587			1133	137	1	.5609848969	1	1	0	0	0	0	0	0	0	0	0	30.12827	36.24255	1	5.560068	27.17358
588						3	C	139046	138399							YCR013C	YCR013C||ebi.ac.uk:Database:sgd;A_06_P1634||www.chem.agilent.com:Database:agp		A_06_P1634	1083382	OLIGO	11.006666684	.94074074	53	6	1	588			1155	137	1	.05249465889	1	1	0	0	0	0	0	0	0	0	1	1107.56	960.24	1	17.77359	27.41155
589					SIL1	15	C	267529	266264	SRP-dependent cotranslational protein-membrane targeting, translocation	molecular function unknown					YOL031C	YOL031C||ebi.ac.uk:Database:sgd;A_06_P6222||www.chem.agilent.com:Database:agp		A_06_P6222	1084055	OLIGO	11.218333351	.94074074	54	6	1	589			1176	138	1	.05498805151	1	1	0	0	0	0	0	0	0	0	0	893.4594	696.2316	1	19.19288	27.05556
590					BNI1	14	C	135382	129521	actin filament organization*	cytoskeletal regulatory protein binding					YNL271C	YNL271C||ebi.ac.uk:Database:sgd;A_06_P6043||www.chem.agilent.com:Database:agp		A_06_P6043	1085318	OLIGO	11.430000018	.94074074	55	6	1	590			1197	137	1	.050976525	1	1	0	0	0	0	0	0	0	0	0	2538.034	1820.833	1	42.2424	27.15709
591					YUR1	10	C	152917	151631	protein amino acid N-linked glycosylation*	mannosyltransferase activity					YJL139C	YJL139C||ebi.ac.uk:Database:sgd;A_06_P4160||www.chem.agilent.com:Database:agp		A_06_P4160	1082611	OLIGO	11.641666685	.94074074	56	6	1	591			1218	138	1	.05789897945	1	1	0	0	0	0	0	0	0	0	1	627.4614	583.9137	1	19.03754	27.18959
592					KES1	16	C	279698	278394	vesicle-mediated transport*	oxysterol binding					YPL145C	YPL145C||ebi.ac.uk:Database:sgd;A_06_P6904||www.chem.agilent.com:Database:agp		A_06_P6904	1085343	OLIGO	11.853333352	.94074074	57	6	1	592			1240	137	1	.05223486383	1	1	0	0	0	0	0	0	0	0	0	5708.932	3319.377	1	78.30344	27.78067
593						16	C	825672	825343							YPR146C	YPR146C||ebi.ac.uk:Database:sgd;A_06_P7194||www.chem.agilent.com:Database:agp		A_06_P7194	1082709	OLIGO	12.065000019	.94074074	58	6	1	593			1261	138	1	.04966891696	1	1	0	0	0	0	0	0	0	0	1	2557.009	2536.975	1	36.39712	26.87218
594					ATP5	4	C	1058808	1058170	ATP synthesis coupled proton transport	structural molecule activity*					YDR298C	YDR298C||ebi.ac.uk:Database:sgd;A_06_P2287||www.chem.agilent.com:Database:agp		A_06_P2287	1085077	OLIGO	12.276666686	.94074074	59	6	1	594			1282	137	1	.04918579187	1	1	0	0	0	0	0	0	0	0	1	12790.84	12132.42	1	171.0633	27.72325
595					EHT1	2	C	586157	584802	lipid metabolism	serine hydrolase activity					YBR177C	YBR177C||ebi.ac.uk:Database:sgd;A_06_P1430||www.chem.agilent.com:Database:agp		A_06_P1430	1084167	OLIGO	12.488333353	.94074074	60	6	1	595			1303	139	1	.05310888713	1	1	0	0	0	0	0	0	0	0	0	6002.701	3226.343	1	55.7256	27.4
596					INP1	13	C	671324	670062	peroxisome inheritance	molecular function unknown					YMR204C	YMR204C||ebi.ac.uk:Database:sgd;A_06_P5643||www.chem.agilent.com:Database:agp		A_06_P5643	1083576	OLIGO	12.70000002	.94074074	61	6	1	596			1323	138	1	.1040230185	1	1	0	0	0	0	0	0	0	0	1	228.6868	178.2677	1	9.458389	27.50181
597					CDC6	10	W	69337	70878	pre-replicative complex formation and maintenance	protein binding*					YJL194W	YJL194W||ebi.ac.uk:Database:sgd;A_06_P4216||www.chem.agilent.com:Database:agp		A_06_P4216	1086891	OLIGO	12.911666687	.94074074	62	6	1	597			1345	138	1	.06433590345	1	1	0	0	0	0	0	0	0	0	0	401.635	507.5444	1	10.70283	26.81439
598						2	W	270247	270633	response to dessication	molecular function unknown					YBR016W	YBR016W||ebi.ac.uk:Database:sgd;A_06_P1263||www.chem.agilent.com:Database:agp		A_06_P1263	1083088	OLIGO	13.123333354	.94074074	63	6	1	598			1367	138	1	.04957651779	1	1	0	0	0	0	0	0	0	0	1	3291.899	2995.561	1	59.77359	27.0036
599					PHO8	4	C	1420240	1418540	protein amino acid dephosphorylation*	alkaline phosphatase activity					YDR481C	YDR481C||ebi.ac.uk:Database:sgd;A_06_P2474||www.chem.agilent.com:Database:agp		A_06_P2474	1086738	OLIGO	13.335000021	.94074074	64	6	1	599			1388	138	1	.04927599863	1	1	0	0	0	0	0	0	0	0	1	6088.715	6548.072	1	87.84383	27.07547
600																	EQC||AgilentControlDB;(+)eQC-39||AgilentControlDB		(+)EQC-39	1081607	CONTROL	13.546666688	.94074074	65	6	1	600			1409	138	1	.5307044874	1	1	0	0	0	0	0	0	0	0	0	27.27004	44.08715	1	4.651625	27.10332
601						11	W	656474	657394	transport	ATPase activity, coupled to transmembrane movement of substances					YKR104W	YKR104W||ebi.ac.uk:Database:sgd;A_06_P4742||www.chem.agilent.com:Database:agp		A_06_P4742	1081776	OLIGO	13.758333355	.94074074	66	6	1	601			1430	138	1	.07014123506	1	1	0	0	0	0	0	0	0	0	1	417.1243	332.6191	1	12.59983	26.86122
602					CAT8	13	C	831328	827027	positive regulation of transcription from RNA polymerase II promoter*	specific RNA polymerase II transcription factor activity					YMR280C	YMR280C||ebi.ac.uk:Database:sgd;A_06_P5719||www.chem.agilent.com:Database:agp		A_06_P5719	1080682	OLIGO	13.970000022	.94074074	67	6	1	602			1451	138	1	.0582702553	1	1	0	0	0	0	0	0	0	0	0	1302.538	613.6333	1	20.2268	26.44364
603					ZRG17	14	C	699431	697614	zinc ion transport	molecular function unknown					YNR039C	YNR039C||ebi.ac.uk:Database:sgd;A_06_P6152||www.chem.agilent.com:Database:agp		A_06_P6152	1083115	OLIGO	14.181666689	.94074074	68	6	1	603			1472	138	1	.06062550971	1	1	0	0	0	0	0	0	0	0	0	628.7394	462.6024	1	14.51245	26.60432
604					GAL11	15	W	234938	238183	transcription from RNA polymerase II promoter	RNA polymerase II transcription mediator activity					YOL051W	YOL051W||ebi.ac.uk:Database:sgd;A_06_P6242||www.chem.agilent.com:Database:agp		A_06_P6242	1081953	OLIGO	14.393333356	.94074074	69	6	1	604			1493	138	1	.05280449517	1	1	0	0	0	0	0	0	0	0	0	1631.377	1068.115	1	32.10179	26.76678
605					YPS3	12	C	390271	388745	protein metabolism	aspartic-type endopeptidase activity					YLR121C	YLR121C||ebi.ac.uk:Database:sgd;A_06_P4934||www.chem.agilent.com:Database:agp		A_06_P4934	1084700	OLIGO	14.605000023	.94074074	70	6	1	605			1514	138	1	.05431321412	1	1	0	0	0	0	0	0	0	0	0	1141.342	772.9884	1	20.26485	26.91144
606						11	C	222931	222539							YKL115C	YKL115C||ebi.ac.uk:Database:sgd;A_06_P4527||www.chem.agilent.com:Database:agp		A_06_P4527	1086761	OLIGO	14.81666669	.94074074	71	6	1	606			1536	138	1	.1500948954	1	1	0	0	0	0	0	0	0	0	1	142.3682	119.2805	1	7.841195	26.76952
607					VPS35	10	C	133853	131019	protein retention in Golgi*	molecular function unknown					YJL154C	YJL154C||ebi.ac.uk:Database:sgd;A_06_P4175||www.chem.agilent.com:Database:agp		A_06_P4175	1085898	OLIGO	15.028333357	.94074074	72	6	1	607			1557	138	1	.05035365011	1	1	0	0	0	0	0	0	0	0	0	2314.258	3028.106	1	34.70304	26.70992
608						12	C	722032	721703							YLR294C	YLR294C||ebi.ac.uk:Database:sgd;A_06_P5110||www.chem.agilent.com:Database:agp		A_06_P5110	1083804	OLIGO	15.240000024	.94074074	73	6	1	608			1578	138	1	.04931185113	1	1	0	0	0	0	0	0	0	0	1	5266.19	5689.857	1	96.39891	26.30337
609					CPD1	7	W	984971	985690	meiosis*	2',3'-cyclic-nucleotide 3'-phosphodiesterase activity					YGR247W	YGR247W||ebi.ac.uk:Database:sgd;A_06_P3468||www.chem.agilent.com:Database:agp		A_06_P3468	1083486	OLIGO	15.451666691	.94074074	74	6	1	609			1599	138	1	.06596188286	1	1	0	0	0	0	0	0	0	0	1	437.7441	404.4231	1	12.36462	26.02878
610					MAS1	12	C	493256	491868	mitochondrial protein processing	mitochondrial processing peptidase activity					YLR163C	YLR163C||ebi.ac.uk:Database:sgd;A_06_P4977||www.chem.agilent.com:Database:agp		A_06_P4977	1085883	OLIGO	15.663333358	.94074074	75	6	1	610			1620	138	1	.05045639364	1	1	0	0	0	0	0	0	0	0	0	1904.624	2420.369	1	29.56527	26.72285
611						9	C	421787	421023	biological process unknown	molecular function unknown					YIR035C	YIR035C||ebi.ac.uk:Database:sgd;A_06_P4012||www.chem.agilent.com:Database:agp		A_06_P4012	1086706	OLIGO	15.875000025	.94074074	76	6	1	611			1642	138	1	.05146752582	1	1	0	0	0	0	0	0	0	0	0	4118.204	6586.347	1	65.28642	26.36
612						11	W	304759	305529	biological process unknown	molecular function unknown					YKL071W	YKL071W||ebi.ac.uk:Database:sgd;A_06_P4481||www.chem.agilent.com:Database:agp		A_06_P4481	1080860	OLIGO	16.086666692	.94074074	77	6	1	612			1663	137	1	.2706636514	1	1	0	0	0	0	0	0	0	0	1	79.94835	60.02876	1	7.803726	26.34263
613																	EQC||AgilentControlDB;(+)eQC-39||AgilentControlDB		(+)EQC-39	1081607	CONTROL	16.298333359	.94074074	78	6	1	613			1684	138	1	.4948552661	1	1	0	0	0	0	0	0	0	0	0	37.67521	37.43066	1	6.344553	26.78755
614					PCL8	16	W	136749	138227	regulation of glycogen biosynthesis*	cyclin-dependent protein kinase regulator activity					YPL219W	YPL219W||ebi.ac.uk:Database:sgd;A_06_P6979||www.chem.agilent.com:Database:agp		A_06_P6979	1083849	OLIGO	16.510000026	.94074074	79	6	1	614			1706	138	1	.05718394501	1	1	0	0	0	0	0	0	0	0	0	863.457	571.1101	1	15.27703	26.61303
615					GRH1	4	W	1477229	1478347	mitotic spindle checkpoint	molecular function unknown					YDR517W	YDR517W||ebi.ac.uk:Database:sgd;A_06_P2510||www.chem.agilent.com:Database:agp		A_06_P2510	1083313	OLIGO	16.721666693	.94074074	80	6	1	615			1726	138	1	.05020057401	1	1	0	0	0	0	0	0	0	0	1	1780.4	1925.568	1	22.21753	26.49442
616					CTR3	12	W	947250	947975	copper ion import	copper uptake transporter activity					YLR411W	YLR411W||ebi.ac.uk:Database:sgd;A_06_P5229||www.chem.agilent.com:Database:agp		A_06_P5229	1082627	OLIGO	16.93333336	.94074074	81	6	1	616			1747	138	1	.1206033103	1	1	0	0	0	0	0	0	0	0	1	147.8519	190.6404	1	8.335558	26.29008
617						11	C	30688	26828	biological process unknown	molecular function unknown					YKL215C	YKL215C||ebi.ac.uk:Database:sgd;A_06_P4627||www.chem.agilent.com:Database:agp		A_06_P4627	1086469	OLIGO	17.145000027	.94074074	82	6	1	617			1768	139	1	.05080187498	1	1	0	0	0	0	0	0	0	0	1	1729.317	1451.904	1	32.45907	26.05415
618					SFB3	8	C	301936	299147	ER to Golgi transport	molecular function unknown					YHR098C	YHR098C||ebi.ac.uk:Database:sgd;A_06_P3673||www.chem.agilent.com:Database:agp		A_06_P3673	1080630	OLIGO	17.356666694	.94074074	83	6	1	618			1790	138	1	.05079796747	1	1	0	0	0	0	0	0	0	0	0	2545.896	1872.463	1	36.90828	25.65217
619						3	C	160368	158533	biological process unknown	molecular function unknown					YCR023C	YCR023C||ebi.ac.uk:Database:sgd;A_06_P1647||www.chem.agilent.com:Database:agp		A_06_P1647	1085267	OLIGO	17.568333361	.94074074	84	6	1	619			1811	139	1	.0611474492	1	1	0	0	0	0	0	0	0	0	0	742.9944	434.4345	1	15.35691	25.26277
620						13	C	784280	782619	biological process unknown	molecular function unknown					YMR258C	YMR258C||ebi.ac.uk:Database:sgd;A_06_P5697||www.chem.agilent.com:Database:agp		A_06_P5697	1083698	OLIGO	17.780000028	.94074074	85	6	1	620			1832	138	1	.05041296418	1	1	0	0	0	0	0	0	0	0	0	2403.738	1910.42	1	41.51135	25.69091
621						11	C	369563	369171							YKL036C	YKL036C||ebi.ac.uk:Database:sgd;A_06_P4445||www.chem.agilent.com:Database:agp		A_06_P4445	1085012	OLIGO	17.991666695	.94074074	86	6	1	621			1853	140	1	.4227172178	1	1	0	0	0	0	0	0	0	0	1	44.28074	43.80535	1	6.88746	26.1635
622					SWF1	4	W	703229	704239	spore wall assembly (sensu Fungi)	molecular function unknown					YDR126W	YDR126W||ebi.ac.uk:Database:sgd;A_06_P2114||www.chem.agilent.com:Database:agp		A_06_P2114	1082753	OLIGO	18.203333362	.94074074	87	6	1	622			1874	138	1	.2198314825	1	1	0	0	0	0	0	1	0	0	1	97.50061	76.09766	1	6.210124	26.32234
623						15	C	70544	70155							YOL134C	YOL134C||ebi.ac.uk:Database:sgd;A_06_P6327||www.chem.agilent.com:Database:agp		A_06_P6327	1086250	OLIGO	18.415000029	.94074074	88	6	1	623			1896	139	1	.4352909372	1	1	0	0	0	0	0	1	0	0	1	54.98209	32.54156	1	5.366384	25.9011
624					HOS3	16	W	329605	331698	histone deacetylation	histone deacetylase activity					YPL116W	YPL116W||ebi.ac.uk:Database:sgd;A_06_P6875||www.chem.agilent.com:Database:agp		A_06_P6875	1085526	OLIGO	18.626666696	.94074074	89	6	1	624			1917	138	1	.05192142254	1	1	0	0	0	0	0	0	0	0	0	1429.531	1105.625	1	23.20558	25.40741
625						15	C	751895	751476							YOR218C	YOR218C||ebi.ac.uk:Database:sgd;A_06_P6580||www.chem.agilent.com:Database:agp		A_06_P6580	1085986	OLIGO	18.838333363	.94074074	90	6	1	625			1938	139	1	.4803229212	1	1	0	0	0	0	0	0	0	0	1	46.88246	31.55474	1	6.238208	25.81022
626																	EQC||AgilentControlDB;(+)eQC-39||AgilentControlDB		(+)EQC-39	1081607	CONTROL	19.05000003	.94074074	91	6	1	626			1959	138	1	.516723122	1	1	0	0	0	0	0	0	0	0	0	27.0936	46.59844	1	4.795551	26.12687
627					SLC1	4	C	363583	362672	sphingolipid biosynthesis	1-acylglycerol-3-phosphate O-acyltransferase activity					YDL052C	YDL052C||ebi.ac.uk:Database:sgd;A_06_P1781||www.chem.agilent.com:Database:agp		A_06_P1781	1081872	OLIGO	19.261666697	.94074074	92	6	1	627			1980	139	1	.04971892947	1	1	0	0	0	0	0	0	0	0	1	3614.31	3068.396	1	52.06001	25.73188
628					ERG6	13	C	252990	251839	ergosterol biosynthesis	sterol 24-C-methyltransferase activity					YML008C	YML008C||ebi.ac.uk:Database:sgd;A_06_P5295||www.chem.agilent.com:Database:agp		A_06_P5295	1083805	OLIGO	19.473333364	.94074074	93	6	1	628			2001	137	1	.04984652664	1	1	0	0	0	0	0	0	0	0	1	3244.748	2716.612	1	44.63911	25.54513
629					PMT6	7	W	897507	899786	protein amino acid O-linked glycosylation	dolichyl-phosphate-mannose-protein mannosyltransferase activity					YGR199W	YGR199W||ebi.ac.uk:Database:sgd;A_06_P3420||www.chem.agilent.com:Database:agp		A_06_P3420	1084986	OLIGO	19.685000031	.94074074	94	6	1	629			2023	139	1	.05117469977	1	1	0	0	0	0	0	0	0	0	0	3111.729	2107.104	1	55.98588	25.93284
630						1	W	228835	229308	biological process unknown	molecular function unknown					YAR075W	YAR075W||ebi.ac.uk:Database:sgd;A_06_P1129||www.chem.agilent.com:Database:agp		A_06_P1129	1081996	OLIGO	19.896666698	.94074074	95	6	1	630			2044	138	1	.05505339624	1	1	0	0	0	0	0	0	0	0	0	2164.986	1088.993	1	31.4028	25.5668
631						10	W	137041	137343							YJL150W	YJL150W||ebi.ac.uk:Database:sgd;A_06_P4171||www.chem.agilent.com:Database:agp		A_06_P4171	1083940	OLIGO	20.108333365	.94074074	96	6	1	631			2065	139	1	.5136699996	1	1	0	0	0	0	0	0	0	0	1	38.44533	33.9775	1	6.119679	25.8705
632					ALG6	15	W	329417	331051	protein amino acid glycosylation*	transferase activity, transferring hexosyl groups					YOR002W	YOR002W||ebi.ac.uk:Database:sgd;A_06_P6362||www.chem.agilent.com:Database:agp		A_06_P6362	1081916	OLIGO	20.320000032	.94074074	97	6	1	632			2086	138	1	.05161246191	1	1	0	0	0	0	0	0	0	0	0	2636.784	1736.094	1	43.94421	25.79856
633					TIF1	11	W	554629	555816	translational initiation	translation initiation factor activity					YKR059W	YKR059W||ebi.ac.uk:Database:sgd;A_06_P4697||www.chem.agilent.com:Database:agp		A_06_P4697	1081296	OLIGO	20.531666699	.94074074	98	6	1	633			2107	139	1	.04922025233	1	1	0	0	0	0	0	0	0	0	1	70713.6	64563.51	1	1007.373	26.2037
634					SOD1	10	C	622927	622463	zinc ion homeostasis*	copper, zinc superoxide dismutase activity					YJR104C	YJR104C||ebi.ac.uk:Database:sgd;A_06_P4347||www.chem.agilent.com:Database:agp		A_06_P4347	1081476	OLIGO	20.743333366	.94074074	99	6	1	634			2129	138	1	.04921992407	1	1	0	0	0	0	0	0	0	0	1	49106.24	53758.34	1	506.7711	26.28571
635					ECM22	12	C	602465	600021	sterol biosynthesis	RNA polymerase II transcription factor activity					YLR228C	YLR228C||ebi.ac.uk:Database:sgd;A_06_P5042||www.chem.agilent.com:Database:agp		A_06_P5042	1083470	OLIGO	20.955000033	.94074074	100	6	1	635			2150	138	1	.05430240094	1	1	0	0	0	0	0	0	0	0	0	751.8623	912.8194	1	15.33318	25.92308
636					RFC4	15	C	142554	141583	mismatch repair*	DNA clamp loader activity*					YOL094C	YOL094C||ebi.ac.uk:Database:sgd;A_06_P6287||www.chem.agilent.com:Database:agp		A_06_P6287	1082328	OLIGO	21.1666667	.94074074	101	6	1	636			2170	138	1	.06113572187	1	1	0	0	0	0	0	0	0	0	0	439.1816	672.4414	1	11.25809	26.37407
637					YPR1	4	W	1213894	1214832	arabinose catabolism*	oxidoreductase activity*					YDR368W	YDR368W||ebi.ac.uk:Database:sgd;A_06_P2360||www.chem.agilent.com:Database:agp		A_06_P2360	1084918	OLIGO	21.378333367	.94074074	102	6	1	637			2191	139	1	.04927488221	1	1	0	0	0	0	0	0	0	0	1	6645.745	7208.682	1	89.24468	25.92364
638						2	W	642578	642895							YBR209W	YBR209W||ebi.ac.uk:Database:sgd;A_06_P1462||www.chem.agilent.com:Database:agp		A_06_P1462	1085423	OLIGO	21.590000034	.94074074	103	6	1	638			2213	138	1	.551281314	1	1	0	0	0	0	0	0	0	0	0	31.04507	36.45576	1	5.62878	25.23221
639																	EQC||AgilentControlDB;(+)eQC-39||AgilentControlDB		(+)EQC-39	1081607	CONTROL	21.801666701	.94074074	104	6	1	639			2234	139	1	.5151056005	1	1	0	0	0	0	0	0	0	0	0	25.58721	49.14106	1	4.622715	25.9
640					CDC45	12	C	345942	343990	DNA replication initiation*	DNA binding					YLR103C	YLR103C||ebi.ac.uk:Database:sgd;A_06_P4916||www.chem.agilent.com:Database:agp		A_06_P4916	1081825	OLIGO	22.013333368	.94074074	105	6	1	640			2255	138	1	.05476621168	1	1	0	0	0	0	0	0	0	0	1	738.077	800.3751	1	12.96383	26
641					GZF3	10	C	211494	209839	negative regulation of transcription from RNA polymerase II promoter*	transcription factor activity*					YJL110C	YJL110C||ebi.ac.uk:Database:sgd;A_06_P4132||www.chem.agilent.com:Database:agp		A_06_P4132	1081038	OLIGO	22.225000035	.94074074	106	6	1	641			2277	139	1	.06334072138	1	1	0	0	0	0	0	0	0	0	0	552.9841	407.8363	1	12.71557	25.44727
642					HCM1	3	W	229305	230999	transcription initiation from RNA polymerase II promoter*	specific RNA polymerase II transcription factor activity					YCR065W	YCR065W||ebi.ac.uk:Database:sgd;A_06_P1687||www.chem.agilent.com:Database:agp		A_06_P1687	1086922	OLIGO	22.436666702	.94074074	107	6	1	642			2297	138	1	.05191228817	1	1	0	0	0	0	0	0	0	0	0	1535.889	1143.873	1	21.30932	24.50735
643					FAB1	6	W	184490	191326	response to stress*	1-phosphatidylinositol-3-phosphate 5-kinase activity					YFR019W	YFR019W||ebi.ac.uk:Database:sgd;A_06_P2914||www.chem.agilent.com:Database:agp		A_06_P2914	1081534	OLIGO	0	1.128888888	1	7	1	643			54	156	1	.05678023286	1	1	0	0	0	0	0	0	0	0	0	592.5232	908.7798	1	11.52617	25.09524
644					GAL7	2	C	275527	274427	galactose metabolism	UTP-hexose-1-phosphate uridylyltransferase activity					YBR018C	YBR018C||ebi.ac.uk:Database:sgd;A_06_P1265||www.chem.agilent.com:Database:agp		A_06_P1265	1086683	OLIGO	.211666667	1.128888888	2	7	1	644			75	157	1	.342898203	1	1	0	0	0	0	0	0	0	0	1	49.17613	60.19223	1	8.156318	26.73145
645					INP54	15	C	205884	204730	exocytosis*	inositol-polyphosphate 5-phosphatase activity					YOL065C	YOL065C||ebi.ac.uk:Database:sgd;A_06_P6257||www.chem.agilent.com:Database:agp		A_06_P6257	1085071	OLIGO	.423333334	1.128888888	3	7	1	645			96	156	1	.05038752078	1	1	0	0	0	0	0	1	0	0	1	1677.716	1641.117	1	24.58315	26.96552
646						15	C	727234	725564	biological process unknown	molecular function unknown					YOR205C	YOR205C||ebi.ac.uk:Database:sgd;A_06_P6567||www.chem.agilent.com:Database:agp		A_06_P6567	1081520	OLIGO	.635000001	1.128888888	4	7	1	646			118	157	1	.05821494523	1	1	0	0	0	0	0	0	0	0	0	527.9835	768.9042	1	12.54679	26.38545
647						7	C	173085	171421	biological process unknown	molecular function unknown					YGL176C	YGL176C||ebi.ac.uk:Database:sgd;A_06_P3131||www.chem.agilent.com:Database:agp		A_06_P3131	1082694	OLIGO	.846666668	1.128888888	5	7	1	647			139	157	1	.06671746929	1	1	0	0	0	0	0	0	0	0	1	449.9395	377.8222	1	11.66258	26.11152
649					YPS6	9	C	432107	430494	biological process unknown	aspartic-type endopeptidase activity					YIR039C	YIR039C||ebi.ac.uk:Database:sgd;A_06_P4016||www.chem.agilent.com:Database:agp		A_06_P4016	1082762	OLIGO	1.270000002	1.128888888	7	7	1	649			181	156	1	.0941825935	1	1	0	0	0	0	0	0	0	0	0	136.8424	441.0849	1	7.776228	26.34118
650					ATG21	16	W	361869	363359	autophagy*	phosphoinositide binding					YPL100W	YPL100W||ebi.ac.uk:Database:sgd;A_06_P6859||www.chem.agilent.com:Database:agp		A_06_P6859	1082609	OLIGO	1.481666669	1.128888888	8	7	1	650			203	157	1	.05125342997	1	1	0	0	0	0	0	0	0	0	1	1256.067	1282.531	1	20.26269	26.2682
651					RNR3	9	C	240705	238096	DNA replication	ribonucleoside-diphosphate reductase activity					YIL066C	YIL066C||ebi.ac.uk:Database:sgd;A_06_P3866||www.chem.agilent.com:Database:agp		A_06_P3866	1084419	OLIGO	1.693333336	1.128888888	9	7	1	651			223	156	1	.09079615719	1	1	0	0	0	0	0	0	0	0	1	280.0787	210.947	1	11.34044	26.50936
652						13	C	82620	82219							YML094C-A	YML094C-A||ebi.ac.uk:Database:sgd;A_06_P5386||www.chem.agilent.com:Database:agp		A_06_P5386	1080824	OLIGO	1.905000003	1.128888888	10	7	1	652			245	157	1	.524490584	1	1	0	0	0	0	0	0	0	0	1	36.24873	34.58774	1	5.920957	26.6566
653					GID8	13	C	540055	538688	negative regulation of gluconeogenesis*	molecular function unknown					YMR135C	YMR135C||ebi.ac.uk:Database:sgd;A_06_P5566||www.chem.agilent.com:Database:agp		A_06_P5566	1082931	OLIGO	2.11666667	1.128888888	11	7	1	653			266	156	1	.05007556226	1	1	0	0	0	0	0	0	0	0	1	2596.613	3267.896	1	52.65927	26.6834
654					USE1	7	W	317345	318082	ER to Golgi transport*	SNAP receptor activity					YGL098W	YGL098W||ebi.ac.uk:Database:sgd;A_06_P3053||www.chem.agilent.com:Database:agp		A_06_P3053	1084061	OLIGO	2.328333337	1.128888888	12	7	1	654			287	157	1	.06682776494	1	1	0	0	0	0	0	0	0	0	0	342.1208	528.7131	1	10.46599	26.94297
655																	(+)E1A_r60_3||AgilentControlDB;E1A_r60_3||AgilentControlDB		(+)E1A_R60_3	1545261	CONTROL	2.540000004	1.128888888	13	7	1	655			308	155	1	.5688146738	1	1	0	0	0	0	0	0	0	0	0	29.60517	35.85938	1	5.337479	26.28996
656						7	C	217374	216697							YGL152C	YGL152C||ebi.ac.uk:Database:sgd;A_06_P3107||www.chem.agilent.com:Database:agp		A_06_P3107	1082367	OLIGO	2.751666671	1.128888888	14	7	1	656			331	157	1	.2327254949	1	1	0	0	0	0	0	1	0	0	1	81.405	81.17127	1	8.047724	26.19101
657					CCW14	12	W	903724	904440	cell wall organization and biogenesis	structural constituent of cell wall					YLR390W-A	YLR390W-A||ebi.ac.uk:Database:sgd;A_06_P5209||www.chem.agilent.com:Database:agp		A_06_P5209	1084827	OLIGO	2.963333338	1.128888888	15	7	1	657			351	156	1	.04944259421	1	1	0	0	0	0	0	1	0	0	1	10218.68	8687.972	1	148.2156	26.55344
658					MMT1	13	W	616565	618097	iron ion homeostasis	molecular function unknown					YMR177W	YMR177W||ebi.ac.uk:Database:sgd;A_06_P5614||www.chem.agilent.com:Database:agp		A_06_P5614	1083771	OLIGO	3.175000005	1.128888888	16	7	1	658			372	156	1	.06984437679	1	1	0	0	0	0	0	0	0	0	1	394.7353	352.9876	1	10.49177	26.74074
659					SLX9	7	C	643784	643152	DNA metabolism	molecular function unknown					YGR081C	YGR081C||ebi.ac.uk:Database:sgd;A_06_P3301||www.chem.agilent.com:Database:agp		A_06_P3301	1085493	OLIGO	3.386666672	1.128888888	17	7	1	659			393	156	1	.06362437211	1	1	0	0	0	0	0	0	0	0	1	417.5792	512.7297	1	13.31055	26.53597
660					VPS5	15	W	453769	455796	protein retention in Golgi*	protein transporter activity					YOR069W	YOR069W||ebi.ac.uk:Database:sgd;A_06_P6431||www.chem.agilent.com:Database:agp		A_06_P6431	1083389	OLIGO	3.598333339	1.128888888	18	7	1	660			414	157	1	.05862836099	1	1	0	0	0	0	0	0	0	0	0	694.6967	520.4789	1	12.3279	26.6787
661						4	C	582495	581905	biological process unknown	molecular function unknown					YDR066C	YDR066C||ebi.ac.uk:Database:sgd;A_06_P2053||www.chem.agilent.com:Database:agp		A_06_P2053	1083827	OLIGO	3.810000006	1.128888888	19	7	1	661			436	156	1	.06427244332	1	1	0	0	0	0	0	0	0	0	0	383.286	561.3611	1	11.95433	26.40741
662																	(+)E1A_r60_a20||AgilentControlDB;E1A_r60_a20||AgilentControlDB		(+)E1A_R60_A20	1545259	CONTROL	4.021666673	1.128888888	20	7	1	662			456	156	1	.2582671712	1	1	0	0	0	0	0	0	0	0	0	92.42888	56.61957	1	8.302989	26.91729
663					KRE5	15	W	949768	953865	beta-1,6 glucan biosynthesis	UDP-glucose:glycoprotein glucosyltransferase activity					YOR336W	YOR336W||ebi.ac.uk:Database:sgd;A_06_P6700||www.chem.agilent.com:Database:agp		A_06_P6700	1083339	OLIGO	4.23333334	1.128888888	21	7	1	663			477	156	1	.05038501147	1	1	0	0	0	0	0	0	0	0	0	2365.827	1899.017	1	40.36416	27.08209
664					SUL2	12	W	323545	326226	sulfate transport	sulfate transporter activity					YLR092W	YLR092W||ebi.ac.uk:Database:sgd;A_06_P4904||www.chem.agilent.com:Database:agp		A_06_P4904	1081763	OLIGO	4.445000007	1.128888888	22	7	1	664			498	157	1	.0500362846	1	1	0	0	0	0	0	0	0	0	1	5891.408	4471.944	1	74.19639	26.68462
665					ATP17	4	W	1228601	1228906	ATP synthesis coupled proton transport	hydrogen-transporting ATP synthase activity, rotational mechanism					YDR377W	YDR377W||ebi.ac.uk:Database:sgd;A_06_P2369||www.chem.agilent.com:Database:agp		A_06_P2369	1086325	OLIGO	4.656666674	1.128888888	23	7	1	665			520	156	1	.04978167903	1	1	0	0	0	0	0	0	0	0	1	18134.03	23297.07	1	240.2437	26.62548
666					SAC6	4	C	715374	713335	endocytosis*	protein binding, bridging*					YDR129C	YDR129C||ebi.ac.uk:Database:sgd;A_06_P2117||www.chem.agilent.com:Database:agp		A_06_P2117	1082104	OLIGO	4.868333341	1.128888888	24	7	1	666			541	157	1	.04968153739	1	1	0	0	0	0	0	0	0	0	1	15294.24	12179.34	1	211.0977	26.8289
667					YBT1	12	C	46264	41279	bile acid transport	ATPase activity, coupled to transmembrane movement of substances*					YLL048C	YLL048C||ebi.ac.uk:Database:sgd;A_06_P4793||www.chem.agilent.com:Database:agp		A_06_P4793	1084036	OLIGO	5.080000008	1.128888888	25	7	1	667			562	157	1	.05040935207	1	1	0	0	0	0	0	0	0	0	0	3436.803	2556.159	1	40.87708	26.64015
668						9	W	9183	9500	biological process unknown	molecular function unknown					YIL175W	YIL175W||ebi.ac.uk:Database:sgd;A_06_P3974||www.chem.agilent.com:Database:agp		A_06_P3974	1086415	OLIGO	5.291666675	1.128888888	26	7	1	668			583	157	1	.3896655141	1	1	0	0	0	0	0	0	0	0	1	69.87974	31.1608	1	7.68593	26.11742
670					VPS4	16	C	887833	886520	protein retention in Golgi*	ATPase activity					YPR173C	YPR173C||ebi.ac.uk:Database:sgd;A_06_P7221||www.chem.agilent.com:Database:agp		A_06_P7221	1082710	OLIGO	5.715000009	1.128888888	28	7	1	670			626	157	1	.05045129835	1	1	0	0	0	0	0	0	0	0	1	7245.373	5115.93	1	112.3915	25.98141
671					RPS10A	15	W	867095	867849	protein biosynthesis	structural constituent of ribosome					YOR293W	YOR293W||ebi.ac.uk:Database:sgd;A_06_P6654||www.chem.agilent.com:Database:agp		A_06_P6654	1081651	OLIGO	5.926666676	1.128888888	29	7	1	671			647	156	1	.04946394819	1	1	0	0	0	0	0	0	0	0	1	7463.473	8798.746	1	93.92124	26.6963
672					CGR1	7	W	440068	440430	rRNA processing*	molecular function unknown					YGL029W	YGL029W||ebi.ac.uk:Database:sgd;A_06_P2984||www.chem.agilent.com:Database:agp		A_06_P2984	1081739	OLIGO	6.138333343	1.128888888	30	7	1	672			668	157	1	.05171560015	1	1	0	0	0	0	0	0	0	0	1	1226.473	1111.741	1	22.79137	27.39259
673					UTP10	10	C	217226	211917	processing of 20S pre-rRNA	snoRNA binding					YJL109C	YJL109C||ebi.ac.uk:Database:sgd;A_06_P4131||www.chem.agilent.com:Database:agp		A_06_P4131	1085220	OLIGO	6.35000001	1.128888888	31	7	1	673			690	156	1	.0497307676	1	1	0	0	0	0	0	0	0	0	1	2414.19	2404.511	1	37.61341	27.39855
674					ARC15	9	C	244459	243995	mitochondrion inheritance*	structural molecule activity*					YIL062C	YIL062C||ebi.ac.uk:Database:sgd;A_06_P3862||www.chem.agilent.com:Database:agp		A_06_P3862	1085545	OLIGO	6.561666677	1.128888888	32	7	1	674			710	157	1	.04978489534	1	1	0	0	0	0	0	0	0	0	1	4679.816	5873.114	1	73.70032	26.93846
675					ITR1	4	C	1445457	1443703	myo-inositol transport	myo-inositol transporter activity					YDR497C	YDR497C||ebi.ac.uk:Database:sgd;A_06_P2490||www.chem.agilent.com:Database:agp		A_06_P2490	1085488	OLIGO	6.773333344	1.128888888	33	7	1	675			731	156	1	.05523005913	1	1	0	0	0	0	0	0	0	0	1	34828.67	15768.44	1	311.2702	27.32453
676																	(+)E1A_r60_a104||AgilentControlDB;E1A_r60_a104||AgilentControlDB		(+)E1A_R60_A104	1545260	CONTROL	6.985000011	1.128888888	34	7	1	676			753	157	1	.5384421235	1	1	0	0	0	0	0	0	0	0	0	34.53521	34.43732	1	5.974806	27.27444
677					TIF5	16	W	648701	649918	regulation of translational initiation*	translation initiation factor activity*					YPR041W	YPR041W||ebi.ac.uk:Database:sgd;A_06_P7087||www.chem.agilent.com:Database:agp		A_06_P7087	1083177	OLIGO	7.196666678	1.128888888	35	7	1	677			774	156	1	.05186481788	1	1	0	0	0	0	0	0	0	0	0	1084.784	1310.15	1	14.50787	27.4781
678					MDJ1	6	C	106230	104695	protein folding*	unfolded protein binding*					YFL016C	YFL016C||ebi.ac.uk:Database:sgd;A_06_P2841||www.chem.agilent.com:Database:agp		A_06_P2841	1086873	OLIGO	7.408333345	1.128888888	36	7	1	678			795	157	1	.05040977777	1	1	0	0	0	0	0	0	0	0	0	1845.795	2286.957	1	37.85744	27.73962
679					RNQ1	3	W	70150	71367	biological process unknown	molecular function unknown					YCL028W	YCL028W||ebi.ac.uk:Database:sgd;A_06_P1580||www.chem.agilent.com:Database:agp		A_06_P1580	1084877	OLIGO	7.620000012	1.128888888	37	7	1	679			816	156	1	.04924944282	1	1	0	0	0	0	0	0	0	0	1	5498.541	5528.279	1	70.97921	27.10332
680					HSV2	7	C	942218	940872	biological process unknown	phosphoinositide binding					YGR223C	YGR223C||ebi.ac.uk:Database:sgd;A_06_P3444||www.chem.agilent.com:Database:agp		A_06_P3444	1085783	OLIGO	7.831666679	1.128888888	38	7	1	680			837	157	1	.05156172746	1	1	0	0	0	0	0	0	0	0	1	1154.921	1232.497	1	21.23128	26.96679
681						7	C	1060046	1059021	biological process unknown	molecular function unknown					YGR283C	YGR283C||ebi.ac.uk:Database:sgd;A_06_P3505||www.chem.agilent.com:Database:agp		A_06_P3505	1082996	OLIGO	8.043333346	1.128888888	39	7	1	681			859	156	1	.0597326021	1	1	0	0	0	0	0	0	0	0	1	518.4519	576.8133	1	13.07779	27.35636
682					CUP2	7	W	191135	191812	transcription initiation from RNA polymerase II promoter*	ligand-regulated transcription factor activity					YGL166W	YGL166W||ebi.ac.uk:Database:sgd;A_06_P3121||www.chem.agilent.com:Database:agp		A_06_P3121	1080688	OLIGO	8.255000013	1.128888888	40	7	1	682			880	157	1	.05188219126	1	1	0	0	0	0	0	0	0	0	0	1293.701	1078.8	1	22.45753	27.21455
683																	E1A_r60_a107||AgilentControlDB;(+)E1A_r60_a107||AgilentControlDB		(+)E1A_R60_A107	1545262	CONTROL	8.46666668	1.128888888	41	7	1	683			900	155	1	.538464536	1	1	0	0	0	0	0	0	0	0	0	26.28779	44.26967	1	4.323831	27.22963
684					DOT6	5	C	335184	333172	regulation of transcription from RNA polymerase II promoter*	molecular function unknown					YER088C	YER088C||ebi.ac.uk:Database:sgd;A_06_P2719||www.chem.agilent.com:Database:agp		A_06_P2719	1082893	OLIGO	8.678333347	1.128888888	42	7	1	684			922	157	1	.05034369255	1	1	0	0	0	0	0	0	0	0	1	1934.721	1701.83	1	26.05861	27.45263
685					INH1	4	W	135180	135437	ATP synthesis coupled proton transport	enzyme inhibitor activity					YDL181W	YDL181W||ebi.ac.uk:Database:sgd;A_06_P1915||www.chem.agilent.com:Database:agp		A_06_P1915	1085789	OLIGO	8.890000014	1.128888888	43	7	1	685			943	156	1	.04923838839	1	1	0	0	0	0	0	0	0	0	1	7101.112	6722.03	1	92.02871	26.99257
686					SIM1	9	W	128151	129578	microtubule cytoskeleton organization and biogenesis	molecular function unknown					YIL123W	YIL123W||ebi.ac.uk:Database:sgd;A_06_P3922||www.chem.agilent.com:Database:agp		A_06_P3922	1082585	OLIGO	9.101666681	1.128888888	44	7	1	686			964	157	1	.05418185895	1	1	0	0	0	0	0	0	0	0	0	11393.38	5575.654	1	144.8537	27.60498
687					NDE2	4	W	303211	304848	ethanol fermentation*	NADH dehydrogenase activity					YDL085W	YDL085W||ebi.ac.uk:Database:sgd;A_06_P1815||www.chem.agilent.com:Database:agp		A_06_P1815	1082045	OLIGO	9.313333348	1.128888888	45	7	1	687			985	156	1	.1295981067	1	1	0	0	0	0	0	0	0	0	1	181.5143	130.8037	1	8.855155	27.56458
688						15	C	461277	459481	transport	transporter activity					YOR071C	YOR071C||ebi.ac.uk:Database:sgd;A_06_P6433||www.chem.agilent.com:Database:agp		A_06_P6433	1085444	OLIGO	9.525000015	1.128888888	46	7	1	688			1007	157	1	.06223746322	1	1	0	0	0	0	0	0	0	0	1	505.9271	465.1352	1	15.68125	27.02206
689					HAL5	10	C	109454	106887	cation homeostasis	protein kinase activity					YJL165C	YJL165C||ebi.ac.uk:Database:sgd;A_06_P4187||www.chem.agilent.com:Database:agp		A_06_P4187	1085019	OLIGO	9.736666682	1.128888888	47	7	1	689			1028	156	1	.05009791607	1	1	0	0	0	0	0	0	0	0	1	1894.772	1888.442	1	33.82497	27.18113
690																	E1A_r60_a22||AgilentControlDB;(+)E1A_r60_a22||AgilentControlDB		(+)E1A_R60_A22	1545265	CONTROL	9.948333349	1.128888888	48	7	1	690			1049	156	1	.2277721495	1	1	0	0	0	0	0	0	0	0	0	132.883	48.89809	1	8.105612	27.10037
691						12	W	951152	953179	biological process unknown	molecular function unknown					YLR413W	YLR413W||ebi.ac.uk:Database:sgd;A_06_P5231||www.chem.agilent.com:Database:agp		A_06_P5231	1081447	OLIGO	10.160000016	1.128888888	49	7	1	691			1070	156	1	.05033167255	1	1	0	0	0	0	0	0	0	0	0	2389.512	1932.773	1	42.41551	26.95865
692						7	C	249536	248499	biological process unknown	molecular function unknown					YGL138C	YGL138C||ebi.ac.uk:Database:sgd;A_06_P3093||www.chem.agilent.com:Database:agp		A_06_P3093	1085118	OLIGO	10.371666683	1.128888888	50	7	1	692			1091	156	1	.5271069159	1	1	0	0	0	0	0	0	0	0	0	26.70682	45.4517	1	4.782883	27.30943
693					SLM1	9	C	169638	167578	actin cytoskeleton organization and biogenesis*	phosphoinositide binding					YIL105C	YIL105C||ebi.ac.uk:Database:sgd;A_06_P3904||www.chem.agilent.com:Database:agp		A_06_P3904	1084853	OLIGO	10.58333335	1.128888888	51	7	1	693			1112	156	1	.05763325292	1	1	0	0	0	0	0	1	0	0	1	621.5754	606.6349	1	15.23534	26.85496
694					SAT4	3	W	128467	130278	G1/S transition of mitotic cell cycle*	protein kinase activity					YCR008W	YCR008W||ebi.ac.uk:Database:sgd;A_06_P1629||www.chem.agilent.com:Database:agp		A_06_P1629	1081714	OLIGO	10.795000017	1.128888888	52	7	1	694			1134	157	1	.05020413386	1	1	0	0	0	0	0	0	0	0	0	2254.381	2835.711	1	30.22574	27.3617
695						8	W	456590	457951	biological process unknown	molecular function unknown					YHR177W	YHR177W||ebi.ac.uk:Database:sgd;A_06_P3755||www.chem.agilent.com:Database:agp		A_06_P3755	1084813	OLIGO	11.006666684	1.128888888	53	7	1	695			1155	156	1	.5025423267	1	1	0	0	0	0	0	0	0	0	0	27.40527	48.60245	1	3.658812	27.07865
696					RPS0B	12	W	242233	243350	protein biosynthesis*	structural constituent of ribosome					YLR048W	YLR048W||ebi.ac.uk:Database:sgd;A_06_P4860||www.chem.agilent.com:Database:agp		A_06_P4860	1085091	OLIGO	11.218333351	1.128888888	54	7	1	696			1176	157	1	.04913889112	1	1	0	0	0	0	0	0	0	0	1	89574.22	91282.67	1	879.5219	27.29811
697																	(+)E1A_r60_1||AgilentControlDB;E1A_r60_1||AgilentControlDB		(+)E1A_R60_1	1545263	CONTROL	11.430000018	1.128888888	55	7	1	697			1197	156	1	.3380887075	1	1	0	0	0	0	0	0	0	0	0	45.73351	66.1488	1	7.086698	27.41176
698					MTL1	7	W	529268	530923	cell wall organization and biogenesis	molecular function unknown					YGR023W	YGR023W||ebi.ac.uk:Database:sgd;A_06_P3243||www.chem.agilent.com:Database:agp		A_06_P3243	1080930	OLIGO	11.641666685	1.128888888	56	7	1	698			1218	157	1	.3021000806	1	1	0	0	0	0	0	0	0	0	1	67.6943	56.72178	1	7.776617	27.08015
699						12	W	1055067	1055681	biological process unknown	molecular function unknown					YLR456W	YLR456W||ebi.ac.uk:Database:sgd;A_06_P5275||www.chem.agilent.com:Database:agp		A_06_P5275	1086432	OLIGO	11.853333352	1.128888888	57	7	1	699			1239	156	1	.2516878034	1	1	0	0	0	0	0	0	0	0	1	81.37835	68.82818	1	6.542624	27.63333
700					LYS14	4	C	512105	509733	lysine biosynthesis via aminoadipic acid	transcriptional activator activity					YDR034C	YDR034C||ebi.ac.uk:Database:sgd;A_06_P2019||www.chem.agilent.com:Database:agp		A_06_P2019	1084286	OLIGO	12.065000019	1.128888888	58	7	1	700			1260	157	1	.05102103723	1	1	0	0	0	0	0	0	0	0	0	1586.499	2134.715	1	28.30803	27.24911
701						8	W	558013	559923	biological process unknown	molecular function unknown					YHR218W	YHR218W||ebi.ac.uk:Database:sgd;A_06_P3797||www.chem.agilent.com:Database:agp		A_06_P3797	1085845	OLIGO	12.276666686	1.128888888	59	7	1	701			1282	156	1	.05182088113	1	1	0	0	0	0	0	0	0	0	0	1339.935	1950.065	1	25.20833	27.18681
702					EAF6	10	C	582169	581828	biological process unknown	molecular function unknown					YJR082C	YJR082C||ebi.ac.uk:Database:sgd;A_06_P4324||www.chem.agilent.com:Database:agp		A_06_P4324	1086778	OLIGO	12.488333353	1.128888888	60	7	1	702			1303	158	1	.05279342303	1	1	0	0	0	0	0	0	0	0	1	946.0018	970.9723	1	13.4845	27.23704
703					SCP1	15	W	1026003	1026605	actin filament organization*	protein binding, bridging*					YOR367W	YOR367W||ebi.ac.uk:Database:sgd;A_06_P6731||www.chem.agilent.com:Database:agp		A_06_P6731	1085247	OLIGO	12.70000002	1.128888888	61	7	1	703			1323	157	1	.05099343175	1	1	0	0	0	0	0	0	0	0	1	1384.918	1335.911	1	23.10457	27.16858
704																	E1A_r60_n9||AgilentControlDB;(+)E1A_r60_n9||AgilentControlDB		(+)E1A_R60_N9	1545267	CONTROL	12.911666687	1.128888888	62	7	1	704			1345	158	1	.5393374723	1	1	0	0	0	0	0	0	0	0	0	34.80749	34.05236	1	4.675366	26.77491
705					GMH1	11	W	499924	500745	transport	molecular function unknown					YKR030W	YKR030W||ebi.ac.uk:Database:sgd;A_06_P4667||www.chem.agilent.com:Database:agp		A_06_P4667	1085762	OLIGO	13.123333354	1.128888888	63	7	1	705			1366	157	1	.05045511342	1	1	0	0	0	0	0	0	0	0	1	1589.674	1658.188	1	34.15666	26.71168
706						12	C	906305	904749	biological process unknown	molecular function unknown					YLR392C	YLR392C||ebi.ac.uk:Database:sgd;A_06_P5210||www.chem.agilent.com:Database:agp		A_06_P5210	1083225	OLIGO	13.335000021	1.128888888	64	7	1	706			1388	157	1	.06408863201	1	1	0	0	0	0	0	0	0	0	1	425.2613	478.2664	1	13.42196	26.80657
707					XDJ1	12	W	320702	322081	biological process unknown	chaperone regulator activity					YLR090W	YLR090W||ebi.ac.uk:Database:sgd;A_06_P4902||www.chem.agilent.com:Database:agp		A_06_P4902	1083067	OLIGO	13.546666688	1.128888888	65	7	1	707			1409	156	1	.0521827132	1	1	0	0	0	0	0	0	0	0	0	1112.614	1555.498	1	24.3578	26.58582
708						9	C	308573	308199							YIL025C	YIL025C||ebi.ac.uk:Database:sgd;A_06_P3825||www.chem.agilent.com:Database:agp		A_06_P3825	1086798	OLIGO	13.758333355	1.128888888	66	7	1	708			1430	156	1	.5288609167	1	1	0	0	0	0	0	0	0	0	0	36.17502	34.0791	1	5.803134	26.54074
709					AFG1	5	W	56571	58100	biological process unknown	ATPase activity					YEL052W	YEL052W||ebi.ac.uk:Database:sgd;A_06_P2593||www.chem.agilent.com:Database:agp		A_06_P2593	1084170	OLIGO	13.970000022	1.128888888	67	7	1	709			1451	157	1	.04956655048	1	1	0	0	0	0	0	0	0	0	1	2847.681	2822.846	1	45.50235	26.34191
710					SKN1	7	W	775198	777513	cell wall organization and biogenesis*	glucosidase activity					YGR143W	YGR143W||ebi.ac.uk:Database:sgd;A_06_P3364||www.chem.agilent.com:Database:agp		A_06_P3364	1086508	OLIGO	14.181666689	1.128888888	68	7	1	710			1472	157	1	.05081892314	1	1	0	0	0	0	0	0	0	0	1	1638.8	1416.775	1	31.59023	26.73408
711																	E1A_r60_a135||AgilentControlDB;(+)E1A_r60_a135||AgilentControlDB		(+)E1A_R60_A135	1545258	CONTROL	14.393333356	1.128888888	69	7	1	711			1494	157	1	.5196263241	1	1	0	0	0	0	0	0	0	0	0	34.42883	37.09725	1	4.33255	26.71852
712					INM1	8	C	198277	197390	inositol phosphate dephosphorylation	inositol-1(or 4)-monophosphatase activity					YHR046C	YHR046C||ebi.ac.uk:Database:sgd;A_06_P3618||www.chem.agilent.com:Database:agp		A_06_P3618	1084736	OLIGO	14.605000023	1.128888888	70	7	1	712			1515	157	1	.05222591659	1	1	0	0	0	0	0	0	0	0	0	1807.812	2977.606	1	34.00885	26.74638
713					BNI4	14	W	211921	214599	chitin biosynthesis*	protein binding					YNL233W	YNL233W||ebi.ac.uk:Database:sgd;A_06_P6005||www.chem.agilent.com:Database:agp		A_06_P6005	1084388	OLIGO	14.81666669	1.128888888	71	7	1	713			1536	156	1	.05342723735	1	1	0	0	0	0	0	0	0	0	1	891.1857	872.3983	1	19.21556	26.03557
714					PAU4	12	W	1062916	1063278	biological process unknown	molecular function unknown					YLR461W	YLR461W||ebi.ac.uk:Database:sgd;A_06_P5280||www.chem.agilent.com:Database:agp		A_06_P5280	1084963	OLIGO	15.028333357	1.128888888	72	7	1	714			1557	157	1	.0571802601	1	1	0	0	0	0	0	0	0	0	0	570.8851	808.4442	1	12.69687	26.56554
715					PIP2	15	C	1023208	1020218	peroxisome organization and biogenesis*	DNA binding*					YOR363C	YOR363C||ebi.ac.uk:Database:sgd;A_06_P6727||www.chem.agilent.com:Database:agp		A_06_P6727	1081665	OLIGO	15.240000024	1.128888888	73	7	1	715			1578	157	1	.0612904035	1	1	0	0	0	0	0	0	0	0	0	604.7141	448.2584	1	17.17219	26.14449
716					ATR1	13	W	38196	39824	multidrug transport	multidrug efflux pump activity					YML116W	YML116W||ebi.ac.uk:Database:sgd;A_06_P5409||www.chem.agilent.com:Database:agp		A_06_P5409	1081529	OLIGO	15.451666691	1.128888888	74	7	1	716			1599	157	1	.05608804534	1	1	0	0	0	0	0	0	0	0	0	626.2019	847.0261	1	11.6624	26.21691
717						11	W	452	799							YKL225W	YKL225W||ebi.ac.uk:Database:sgd;A_06_P4637||www.chem.agilent.com:Database:agp		A_06_P4637	1080746	OLIGO	15.663333358	1.128888888	75	7	1	717			1621	157	1	.4548314134	1	1	0	0	0	0	0	0	0	0	1	42.3789	39.4467	1	5.483686	26.56818
718																	E1A_r60_a22||AgilentControlDB;(+)E1A_r60_a22||AgilentControlDB		(+)E1A_R60_A22	1545265	CONTROL	15.875000025	1.128888888	76	7	1	718			1642	157	1	.181666243	1	1	0	0	0	0	0	0	0	0	0	167.4434	63.78118	1	7.561104	26
719					REV3	16	C	237106	232592	DNA repair*	zeta DNA polymerase activity					YPL167C	YPL167C||ebi.ac.uk:Database:sgd;A_06_P6926||www.chem.agilent.com:Database:agp		A_06_P6926	1081058	OLIGO	16.086666692	1.128888888	77	7	1	719			1663	156	1	.05726866345	1	1	0	0	0	0	0	0	0	0	1	623.4165	633.9264	1	15.81159	26.36823
720					SPT23	11	C	401723	398475	positive regulation of transcription from RNA polymerase II promoter*	DNA binding*					YKL020C	YKL020C||ebi.ac.uk:Database:sgd;A_06_P4428||www.chem.agilent.com:Database:agp		A_06_P4428	1086358	OLIGO	16.298333359	1.128888888	78	7	1	720			1684	158	1	.05097580159	1	1	0	0	0	0	0	0	0	0	0	2223.962	1645.025	1	40.69486	26.10526
721						16	W	126006	126446	biological process unknown	molecular function unknown					YPL225W	YPL225W||ebi.ac.uk:Database:sgd;A_06_P6985||www.chem.agilent.com:Database:agp		A_06_P6985	1083601	OLIGO	16.510000026	1.128888888	79	7	1	721			1705	157	1	.05001959284	1	1	0	0	0	0	0	0	0	0	1	8145.686	10871.68	1	127.0425	26.49808
722					HHF2	14	W	576726	577037	chromatin assembly or disassembly	DNA binding					YNL030W	YNL030W||ebi.ac.uk:Database:sgd;A_06_P5801||www.chem.agilent.com:Database:agp		A_06_P5801	1081454	OLIGO	16.721666693	1.128888888	80	7	1	722			1726	158	1	.04927481737	1	1	0	0	0	0	0	0	0	0	1	13209.43	14735.36	1	172.0279	26.05948
723						15	C	841820	841512							YOR277C	YOR277C||ebi.ac.uk:Database:sgd;A_06_P6638||www.chem.agilent.com:Database:agp		A_06_P6638	1086626	OLIGO	16.93333336	1.128888888	81	7	1	723			1747	156	1	.1227029087	1	1	0	0	0	0	0	0	0	0	1	168.8341	160.2011	1	9.244933	25.61887
724					CLB2	16	W	771651	773126	G2/M transition of mitotic cell cycle*	cyclin-dependent protein kinase regulator activity					YPR119W	YPR119W||ebi.ac.uk:Database:sgd;A_06_P7166||www.chem.agilent.com:Database:agp		A_06_P7166	1085669	OLIGO	17.145000027	1.128888888	82	7	1	724			1768	158	1	.05225130147	1	1	0	0	0	0	0	0	0	0	0	1235.798	1007.035	1	21.05989	25.48736
726						4	C	1249811	1248144	biological process unknown	permease activity					YDR387C	YDR387C||ebi.ac.uk:Database:sgd;A_06_P2380||www.chem.agilent.com:Database:agp		A_06_P2380	1086024	OLIGO	17.568333361	1.128888888	84	7	1	726			1811	158	1	.05376829384	1	1	0	0	0	0	0	0	0	0	0	2014.313	1135.721	1	42.68431	25.40149
727						15	W	427818	428159							YOR053W	YOR053W||ebi.ac.uk:Database:sgd;A_06_P6415||www.chem.agilent.com:Database:agp		A_06_P6415	1082024	OLIGO	17.780000028	1.128888888	85	7	1	727			1832	157	1	.09057569682	1	1	0	0	0	0	0	0	0	0	0	546.1222	138.7476	1	12.53846	25.4771
728					MNN4	11	C	67467	63931	response to stress*	molecular function unknown					YKL201C	YKL201C||ebi.ac.uk:Database:sgd;A_06_P4613||www.chem.agilent.com:Database:agp		A_06_P4613	1081977	OLIGO	17.991666695	1.128888888	86	7	1	728			1853	158	1	.0519833719	1	1	0	0	0	0	0	0	0	0	0	2052.014	1364.724	1	39.33648	25.73664
729					VPS45	7	C	330610	328877	protein complex assembly*	unfolded protein binding					YGL095C	YGL095C||ebi.ac.uk:Database:sgd;A_06_P3050||www.chem.agilent.com:Database:agp		A_06_P3050	1086146	OLIGO	18.203333362	1.128888888	87	7	1	729			1874	157	1	.05272394632	1	1	0	0	0	0	0	1	0	0	1	943.4417	1000.613	1	20.69108	26.28364
730					NSE3	4	W	1037189	1038100	DNA repair	DNA binding					YDR288W	YDR288W||ebi.ac.uk:Database:sgd;A_06_P2277||www.chem.agilent.com:Database:agp		A_06_P2277	1080890	OLIGO	18.415000029	1.128888888	88	7	1	730			1896	158	1	.05304783359	1	1	0	0	0	0	0	0	0	0	1	1027.305	882.2609	1	17.4267	25.52878
731					ENT5	4	C	767966	766731	Golgi to endosome transport*	clathrin binding					YDR153C	YDR153C||ebi.ac.uk:Database:sgd;A_06_P2141||www.chem.agilent.com:Database:agp		A_06_P2141	1085507	OLIGO	18.626666696	1.128888888	89	7	1	731			1917	156	1	.05168758989	1	1	0	0	0	0	0	0	0	0	1	1141.214	1166.226	1	21.12725	25.82397
732																	E1A_r60_n9||AgilentControlDB;(+)E1A_r60_n9||AgilentControlDB		(+)E1A_R60_N9	1545267	CONTROL	18.838333363	1.128888888	90	7	1	732			1938	158	1	.5310074914	1	1	0	0	0	0	0	0	0	0	0	41.90854	28.86424	1	6.397792	25.54015
733					THS1	9	W	212496	214700	protein biosynthesis	threonine-tRNA ligase activity					YIL078W	YIL078W||ebi.ac.uk:Database:sgd;A_06_P3878||www.chem.agilent.com:Database:agp		A_06_P3878	1086489	OLIGO	19.05000003	1.128888888	91	7	1	733			1959	157	1	.04979119038	1	1	0	0	0	0	0	0	0	0	1	15391.15	19798.13	1	207.9802	25.23529
734					SAC7	4	W	1252527	1254491	small GTPase mediated signal transduction*	signal transducer activity*					YDR389W	YDR389W||ebi.ac.uk:Database:sgd;A_06_P2382||www.chem.agilent.com:Database:agp		A_06_P2382	1081020	OLIGO	19.261666697	1.128888888	92	7	1	734			1980	158	1	.08935254943	1	1	0	0	0	0	0	0	0	0	1	242.7202	252.9746	1	9.731262	25.40449
735						12	C	136298	134301	biological process unknown	molecular function unknown					YLL007C	YLL007C||ebi.ac.uk:Database:sgd;A_06_P4751||www.chem.agilent.com:Database:agp		A_06_P4751	1082592	OLIGO	19.473333364	1.128888888	93	7	1	735			2001	157	1	.09248302506	1	1	0	0	0	0	0	0	0	0	1	256.5838	217.5589	1	8.944801	25.89259
736					RPL30	7	W	439096	439643	protein biosynthesis*	structural constituent of ribosome					YGL030W	YGL030W||ebi.ac.uk:Database:sgd;A_06_P2985||www.chem.agilent.com:Database:agp		A_06_P2985	1085469	OLIGO	19.685000031	1.128888888	94	7	1	736			2023	157	1	.05115656753	1	1	0	0	0	0	0	0	0	0	1	40815.97	63908.27	1	541.022	25.98566
737						12	W	66561	66941							YLL037W	YLL037W||ebi.ac.uk:Database:sgd;A_06_P4782||www.chem.agilent.com:Database:agp		A_06_P4782	1085153	OLIGO	19.896666698	1.128888888	95	7	1	737			2043	156	1	.4163782212	1	1	0	0	0	0	0	0	0	0	1	42.95594	46.5386	1	6.145718	26.05682
738						7	C	311936	311508							YGL102C	YGL102C||ebi.ac.uk:Database:sgd;A_06_P3057||www.chem.agilent.com:Database:agp		A_06_P3057	1083840	OLIGO	20.108333365	1.128888888	96	7	1	738			2065	157	1	.04937191992	1	1	0	0	0	0	0	0	0	0	1	4148.93	3947.765	1	53.15849	25.13011
739																	(+)E1A_r60_3||AgilentControlDB;E1A_r60_3||AgilentControlDB		(+)E1A_R60_3	1545261	CONTROL	20.320000032	1.128888888	97	7	1	739			2086	157	1	.5432158628	1	1	0	0	0	0	0	0	0	0	0	29.41602	39.44511	1	4.767611	25.67636
740					HMO1	4	W	812105	812845	plasmid maintenance	single-stranded DNA binding*					YDR174W	YDR174W||ebi.ac.uk:Database:sgd;A_06_P2162||www.chem.agilent.com:Database:agp		A_06_P2162	1082433	OLIGO	20.531666699	1.128888888	98	7	1	740			2107	157	1	.04950256353	1	1	0	0	0	0	0	0	0	0	1	3057.874	3131.046	1	50.22944	25.89011
741						7	W	349619	350443	biological process unknown	molecular function unknown					YGL085W	YGL085W||ebi.ac.uk:Database:sgd;A_06_P3040||www.chem.agilent.com:Database:agp		A_06_P3040	1086743	OLIGO	20.743333366	1.128888888	99	7	1	741			2129	157	1	.05790439005	1	1	0	0	0	0	0	0	0	0	0	547.4803	717.7236	1	13.96937	25.77737
742						16	W	479222	480172	biological process unknown	molecular function unknown					YPL039W	YPL039W||ebi.ac.uk:Database:sgd;A_06_P6798||www.chem.agilent.com:Database:agp		A_06_P6798	1082808	OLIGO	20.955000033	1.128888888	100	7	1	742			2150	158	1	.05407797885	1	1	0	0	0	0	0	0	0	0	0	869.8783	1413.241	1	19.29775	25.68841
743					CSG2	2	C	310313	309081	calcium ion homeostasis*	enzyme regulator activity					YBR036C	YBR036C||ebi.ac.uk:Database:sgd;A_06_P1283||www.chem.agilent.com:Database:agp		A_06_P1283	1085710	OLIGO	21.1666667	1.128888888	101	7	1	743			2170	158	1	.05042993586	1	1	0	0	0	0	0	0	0	0	1	6587.878	4678.547	1	101.0544	25.69057
744					CTK1	11	W	182963	184549	protein amino acid phosphorylation*	protein kinase activity*					YKL139W	YKL139W||ebi.ac.uk:Database:sgd;A_06_P4551||www.chem.agilent.com:Database:agp		A_06_P4551	1082151	OLIGO	21.378333367	1.128888888	102	7	1	744			2191	158	1	.05486927832	1	1	0	0	0	0	0	0	0	0	0	704.6847	943.6575	1	15.34009	25.5941
745						16	W	199094	199375	protein biosynthesis	structural constituent of ribosome					YPL183W-A	YPL183W-A||ebi.ac.uk:Database:sgd;A_06_P6943||www.chem.agilent.com:Database:agp		A_06_P6943	1081326	OLIGO	21.590000034	1.128888888	103	7	1	745			2213	157	1	.05256648632	1	1	0	0	0	0	0	0	0	0	1	950.6691	1079.26	1	20.57726	25.85283
746																	(+)E1A_r60_1||AgilentControlDB;E1A_r60_1||AgilentControlDB		(+)E1A_R60_1	1545263	CONTROL	21.801666701	1.128888888	104	7	1	746			2234	158	1	.369368889	1	1	0	0	0	0	0	0	0	0	0	46.67087	54.56589	1	6.239847	25.73741
747						15	W	605873	606178							YOR146W	YOR146W||ebi.ac.uk:Database:sgd;A_06_P6508||www.chem.agilent.com:Database:agp		A_06_P6508	1081742	OLIGO	22.013333368	1.128888888	105	7	1	747			2255	157	1	.4019524514	1	1	0	0	0	0	0	0	0	0	1	38.53252	55.20541	1	6.390636	25.02703
748					RPS28B	12	W	673133	673336	protein biosynthesis	structural constituent of ribosome					YLR264W	YLR264W||ebi.ac.uk:Database:sgd;A_06_P5079||www.chem.agilent.com:Database:agp		A_06_P5079	1081676	OLIGO	22.225000035	1.128888888	106	7	1	748			2276	157	1	.04973305727	1	1	0	0	0	0	0	0	0	0	1	2435.085	2625.162	1	35.86069	25.07197
749					SFT1	11	C	430275	429841	intra-Golgi transport	v-SNARE activity					YKL006C-A	YKL006C-A||ebi.ac.uk:Database:sgd;A_06_P4412||www.chem.agilent.com:Database:agp		A_06_P4412	1086439	OLIGO	22.436666702	1.128888888	107	7	1	749			2298	157	1	.05139042665	1	1	0	0	0	0	0	0	0	0	0	1348.987	1812.841	1	19.50902	25.04444
750					DED81	8	C	143550	141886	asparaginyl-tRNA aminoacylation	ATP binding*					YHR019C	YHR019C||ebi.ac.uk:Database:sgd;A_06_P3589||www.chem.agilent.com:Database:agp		A_06_P3589	1082382	OLIGO	0	1.317037036	1	8	1	750			54	175	1	.04926033242	1	1	0	0	0	0	0	0	0	0	1	9418.297	8608.277	1	101.1843	25.24731
751					HSP10	15	C	370843	370523	protein folding	unfolded protein binding					YOR020C	YOR020C||ebi.ac.uk:Database:sgd;A_06_P6382||www.chem.agilent.com:Database:agp		A_06_P6382	1085030	OLIGO	.211666667	1.317037036	2	8	1	751			75	176	1	.05301653778	1	1	0	0	0	0	0	0	0	0	0	1666.324	2948.858	1	31.1096	26.78967
752					MCM6	7	C	120911	117858	DNA replication initiation*	chromatin binding*					YGL201C	YGL201C||ebi.ac.uk:Database:sgd;A_06_P3156||www.chem.agilent.com:Database:agp		A_06_P3156	1084191	OLIGO	.423333334	1.317037036	3	8	1	752			97	174	1	.05179522267	1	1	0	0	0	0	0	0	0	0	1	1273.323	1093.311	1	23.28402	26.73704
753					FUS3	2	W	192454	193515	protein amino acid phosphorylation*	MAP kinase activity					YBL016W	YBL016W||ebi.ac.uk:Database:sgd;A_06_P1145||www.chem.agilent.com:Database:agp		A_06_P1145	1083939	OLIGO	.635000001	1.317037036	4	8	1	753			118	176	1	.05574940078	1	1	0	0	0	0	0	0	0	0	0	727.3627	1302.972	1	15.34194	26.45683
754					KEL3	16	C	46506	44551	biological process unknown	molecular function unknown					YPL263C	YPL263C||ebi.ac.uk:Database:sgd;A_06_P7024||www.chem.agilent.com:Database:agp		A_06_P7024	1085957	OLIGO	.846666668	1.317037036	5	8	1	754			139	175	1	.05059946761	1	1	0	0	0	0	0	0	0	0	0	1610.555	1955.136	1	27.79957	26.49451
755						10	W	550425	553232	biological process unknown	molecular function unknown					YJR061W	YJR061W||ebi.ac.uk:Database:sgd;A_06_P4304||www.chem.agilent.com:Database:agp		A_06_P4304	1082174	OLIGO	1.058333335	1.317037036	6	8	1	755			160	176	1	.06280890883	1	1	0	0	0	0	0	0	0	0	0	860.9589	401.591	1	19.10172	26.1673
756						5	C	292201	291701							YER066C-A	YER066C-A||ebi.ac.uk:Database:sgd;A_06_P2696||www.chem.agilent.com:Database:agp		A_06_P2696	1081972	OLIGO	1.270000002	1.317037036	7	8	1	756			181	175	1	.5419811801	1	1	0	0	0	0	0	0	0	0	0	33.40324	35.12993	1	4.707591	26.17176
757					YSA1	2	C	461867	461172	biological process unknown	phosphoribosyl-ATP diphosphatase activity					YBR111C	YBR111C||ebi.ac.uk:Database:sgd;A_06_P1363||www.chem.agilent.com:Database:agp		A_06_P1363	1083696	OLIGO	1.481666669	1.317037036	8	8	1	757			202	176	1	.0494451442	1	1	0	0	0	0	0	0	0	0	1	3442.588	3647.77	1	47.87177	26.64074
758					REX2	12	C	260548	259739	RNA processing	3'-5' exonuclease activity					YLR059C	YLR059C||ebi.ac.uk:Database:sgd;A_06_P4871||www.chem.agilent.com:Database:agp		A_06_P4871	1081585	OLIGO	1.693333336	1.317037036	9	8	1	758			223	175	1	.06196446208	1	1	0	0	0	0	0	0	0	0	1	548.3042	448.7673	1	13.08436	26.55682
759					GWT1	10	C	262468	260996	GPI anchor biosynthesis	molecular function unknown					YJL091C	YJL091C||ebi.ac.uk:Database:sgd;A_06_P4113||www.chem.agilent.com:Database:agp		A_06_P4113	1084613	OLIGO	1.905000003	1.317037036	10	8	1	759			245	175	1	.0573606466	1	1	0	0	0	0	0	0	0	0	0	997.1349	578.9892	1	17.05977	26.56364
760					HTZ1	15	C	303983	303579	regulation of transcription from RNA polymerase II promoter*	chromatin binding					YOL012C	YOL012C||ebi.ac.uk:Database:sgd;A_06_P6202||www.chem.agilent.com:Database:agp		A_06_P6202	1084311	OLIGO	2.11666667	1.317037036	11	8	1	760			266	175	1	.05025395027	1	1	0	0	0	0	0	0	0	0	1	4618.652	3426.305	1	59.95206	26.66165
761					RRN10	2	W	171484	171921	transcription from RNA polymerase I promoter	RNA polymerase I transcription factor activity*					YBL025W	YBL025W||ebi.ac.uk:Database:sgd;A_06_P1154||www.chem.agilent.com:Database:agp		A_06_P1154	1082528	OLIGO	2.328333337	1.317037036	12	8	1	761			287	175	1	.1158618399	1	1	0	0	0	0	0	0	0	0	1	146.2363	212.64	1	7.732757	26.49077
762					CDC33	15	C	61023	60382	translational initiation*	translation initiation factor activity					YOL139C	YOL139C||ebi.ac.uk:Database:sgd;A_06_P6332||www.chem.agilent.com:Database:agp		A_06_P6332	1085626	OLIGO	2.540000004	1.317037036	13	8	1	762			308	175	1	.04962606603	1	1	0	0	0	0	0	0	0	0	1	9880.804	12227.46	1	135.3972	26.04727
763						15	W	847450	848142	biological process unknown	molecular function unknown					YOR283W	YOR283W||ebi.ac.uk:Database:sgd;A_06_P6644||www.chem.agilent.com:Database:agp		A_06_P6644	1082785	OLIGO	2.751666671	1.317037036	14	8	1	763			330	176	1	.04986811462	1	1	0	0	0	0	0	1	0	0	1	3532.244	4422.036	1	52.17936	26
764					UPF3	7	W	634308	635471	mRNA catabolism*	molecular function unknown					YGR072W	YGR072W||ebi.ac.uk:Database:sgd;A_06_P3292||www.chem.agilent.com:Database:agp		A_06_P3292	1083750	OLIGO	2.963333338	1.317037036	15	8	1	764			350	175	1	.05187823613	1	1	0	0	0	0	0	1	0	0	1	1252.559	1074.685	1	24.67536	25.89655
765					ELA1	14	C	218661	217522	RNA elongation from RNA polymerase II promoter	transcriptional elongation regulator activity					YNL230C	YNL230C||ebi.ac.uk:Database:sgd;A_06_P6002||www.chem.agilent.com:Database:agp		A_06_P6002	1083938	OLIGO	3.175000005	1.317037036	16	8	1	765			372	176	1	.2069289385	1	1	0	0	0	0	0	0	0	0	1	85.5289	98.82274	1	8.688896	26.53191
766					RPS3	14	W	302680	303402	protein biosynthesis*	structural constituent of ribosome					YNL178W	YNL178W||ebi.ac.uk:Database:sgd;A_06_P5950||www.chem.agilent.com:Database:agp		A_06_P5950	1084154	OLIGO	3.386666672	1.317037036	17	8	1	766			393	174	1	.05014631842	1	1	0	0	0	0	0	0	0	0	1	65314.21	89561.29	1	709.1894	26.63043
767						13	W	907362	910784	biological process unknown	molecular function unknown					YMR317W	YMR317W||ebi.ac.uk:Database:sgd;A_06_P5762||www.chem.agilent.com:Database:agp		A_06_P5762	1086717	OLIGO	3.598333339	1.317037036	18	8	1	767			414	176	1	.189725586	1	1	0	0	0	0	0	0	0	0	0	63.29432	154.3302	1	7.663838	26.89716
768					TSC13	4	C	426931	425999	very-long-chain fatty acid metabolism	oxidoreductase activity					YDL015C	YDL015C||ebi.ac.uk:Database:sgd;A_06_P1743||www.chem.agilent.com:Database:agp		A_06_P1743	1086311	OLIGO	3.810000006	1.317037036	19	8	1	768			435	175	1	.05265353185	1	1	0	0	0	0	0	0	0	0	1	9469.074	5248.463	1	164.6747	26.32707
769						4	W	769926	770327							YDR157W	YDR157W||ebi.ac.uk:Database:sgd;A_06_P2145||www.chem.agilent.com:Database:agp		A_06_P2145	1082768	OLIGO	4.021666673	1.317037036	20	8	1	769			457	176	1	.2421077867	1	1	0	0	0	0	0	0	0	0	1	54.35727	108.5058	1	7.890981	26.67518
770					TIM22	4	C	68607	67984	mitochondrial inner membrane protein import	protein transporter activity					YDL217C	YDL217C||ebi.ac.uk:Database:sgd;A_06_P1952||www.chem.agilent.com:Database:agp		A_06_P1952	1080645	OLIGO	4.23333334	1.317037036	21	8	1	770			477	175	1	.05538715479	1	1	0	0	0	0	0	0	0	0	0	673.4356	978.4239	1	15.76445	26.84151
771						14	C	637335	636931							YNR005C	YNR005C||ebi.ac.uk:Database:sgd;A_06_P6116||www.chem.agilent.com:Database:agp		A_06_P6116	1080849	OLIGO	4.445000007	1.317037036	22	8	1	771			498	175	1	.524827003	1	1	0	0	0	0	0	0	0	0	0	32.28229	38.6928	1	5.171269	26.95556
772					DST1	7	W	417487	418416	meiotic recombination*	positive transcription elongation factor activity					YGL043W	YGL043W||ebi.ac.uk:Database:sgd;A_06_P2998||www.chem.agilent.com:Database:agp		A_06_P2998	1080904	OLIGO	4.656666674	1.317037036	23	8	1	772			520	175	1	.05307246286	1	1	0	0	0	0	0	0	0	0	0	877.4832	1057.644	1	15.18674	26.42125
773					GPA1	8	C	114911	113493	signal transduction during conjugation with cellular fusion	GTPase activity					YHR005C	YHR005C||ebi.ac.uk:Database:sgd;A_06_P3574||www.chem.agilent.com:Database:agp		A_06_P3574	1082268	OLIGO	4.868333341	1.317037036	24	8	1	773			541	176	1	.05100800051	1	1	0	0	0	0	0	0	0	0	0	1823.09	2555.622	1	34.64078	26.43796
774					YIP5	7	C	200148	199216	vesicle-mediated transport	Rab GTPase binding					YGL161C	YGL161C||ebi.ac.uk:Database:sgd;A_06_P3116||www.chem.agilent.com:Database:agp		A_06_P3116	1082331	OLIGO	5.080000008	1.317037036	25	8	1	774			562	175	1	.04997926151	1	1	0	0	0	0	0	0	0	0	1	5500.498	4232.727	1	81.70599	26.42449
775					MET1	11	W	571254	573035	methionine metabolism*	uroporphyrin-III C-methyltransferase activity					YKR069W	YKR069W||ebi.ac.uk:Database:sgd;A_06_P4707||www.chem.agilent.com:Database:agp		A_06_P4707	1084552	OLIGO	5.291666675	1.317037036	26	8	1	775			583	176	1	.05081686251	1	1	0	0	0	0	0	0	0	0	1	6073.146	9068.968	1	94.44679	26.33333
776					DSE1	5	C	409059	407338	cell wall organization and biogenesis	molecular function unknown					YER124C	YER124C||ebi.ac.uk:Database:sgd;A_06_P2757||www.chem.agilent.com:Database:agp		A_06_P2757	1085570	OLIGO	5.503333342	1.317037036	27	8	1	776			605	175	1	.05173879126	1	1	0	0	0	0	0	0	0	0	1	11390.48	6866.097	1	167.9172	26.33835
777						16	W	843258	844016	biological process unknown	molecular function unknown					YPR158W	YPR158W||ebi.ac.uk:Database:sgd;A_06_P7206||www.chem.agilent.com:Database:agp		A_06_P7206	1082879	OLIGO	5.715000009	1.317037036	28	8	1	777			626	176	1	.06691654449	1	1	0	0	0	0	0	0	0	0	1	388.3771	428.2974	1	9.981479	26.37037
778						5	W	251727	253661	biological process unknown	molecular function unknown					YER049W	YER049W||ebi.ac.uk:Database:sgd;A_06_P2676||www.chem.agilent.com:Database:agp		A_06_P2676	1084443	OLIGO	5.926666676	1.317037036	29	8	1	778			647	175	1	.04921867195	1	1	0	0	0	0	0	0	0	0	1	7775.242	8203.231	1	124.8224	26.82443
779					NRG1	4	C	543366	542671	regulation of transcription from RNA polymerase II promoter*	DNA binding*					YDR043C	YDR043C||ebi.ac.uk:Database:sgd;A_06_P2030||www.chem.agilent.com:Database:agp		A_06_P2030	1086826	OLIGO	6.138333343	1.317037036	30	8	1	779			668	176	1	.05258968644	1	1	0	0	0	0	0	0	0	0	0	1640.032	1095.893	1	25.15943	27.22222
780						7	W	513163	514344	biological process unknown	cysteine synthase activity					YGR012W	YGR012W||ebi.ac.uk:Database:sgd;A_06_P3232||www.chem.agilent.com:Database:agp		A_06_P3232	1080757	OLIGO	6.35000001	1.317037036	31	8	1	780			689	175	1	.05974237171	1	1	0	0	0	0	0	0	0	0	0	481.5652	678.0819	1	12.07183	27.44727
781					HST2	16	C	526880	525807	chromatin silencing at telomere	NAD-dependent histone deacetylase activity					YPL015C	YPL015C||ebi.ac.uk:Database:sgd;A_06_P6774||www.chem.agilent.com:Database:agp		A_06_P6774	1086604	OLIGO	6.561666677	1.317037036	32	8	1	781			711	176	1	.05659069074	1	1	0	0	0	0	0	0	0	0	0	851.4794	598.9323	1	16.46762	27.1476
782					BDP1	14	W	555047	556831	transcription initiation from RNA polymerase III promoter	RNA polymerase III transcription factor activity					YNL039W	YNL039W||ebi.ac.uk:Database:sgd;A_06_P5810||www.chem.agilent.com:Database:agp		A_06_P5810	1081780	OLIGO	6.773333344	1.317037036	33	8	1	782			732	175	1	.05129163221	1	1	0	0	0	0	0	0	0	0	0	2307.246	1619.762	1	45.1891	27.47273
783					URA2	10	C	172285	165641	'de novo' pyrimidine base biosynthesis*	aspartate carbamoyltransferase activity					YJL130C	YJL130C||ebi.ac.uk:Database:sgd;A_06_P4151||www.chem.agilent.com:Database:agp		A_06_P4151	1086647	OLIGO	6.985000011	1.317037036	34	8	1	783			752	175	1	.05630014265	1	1	0	0	0	0	0	0	0	0	1	24215.41	10218.82	1	310.2633	27.61887
784					APM1	16	C	52671	51244	vesicle-mediated transport	clathrin binding					YPL259C	YPL259C||ebi.ac.uk:Database:sgd;A_06_P7020||www.chem.agilent.com:Database:agp		A_06_P7020	1082459	OLIGO	7.196666678	1.317037036	35	8	1	784			774	175	1	.05730618661	1	1	0	0	0	0	0	0	0	0	1	587.4564	687.4927	1	10.74337	27.42909
785						4	W	18959	19312							YDL242W	YDL242W||ebi.ac.uk:Database:sgd;A_06_P1978||www.chem.agilent.com:Database:agp		A_06_P1978	1082964	OLIGO	7.408333345	1.317037036	36	8	1	785			795	175	1	.5359164187	1	1	0	0	0	0	0	0	0	0	0	34.69881	34.60153	1	5.093046	27.01136
786					RPP0	12	W	805887	806825	translational elongation*	structural constituent of ribosome					YLR340W	YLR340W||ebi.ac.uk:Database:sgd;A_06_P5157||www.chem.agilent.com:Database:agp		A_06_P5157	1086258	OLIGO	7.620000012	1.317037036	37	8	1	786			816	175	1	.0492709768	1	1	0	0	0	0	0	0	0	0	1	102848.6	91652.78	1	957.8616	27.48162
787					NNF2	7	W	656964	659774	chromosome segregation	molecular function unknown					YGR089W	YGR089W||ebi.ac.uk:Database:sgd;A_06_P3309||www.chem.agilent.com:Database:agp		A_06_P3309	1086703	OLIGO	7.831666679	1.317037036	38	8	1	787			837	176	1	.0516280003	1	1	0	0	0	0	0	0	0	0	0	2371.402	1588.693	1	47.28689	27.16912
788					MSH4	6	C	137152	134516	meiotic recombination	DNA binding					YFL003C	YFL003C||ebi.ac.uk:Database:sgd;A_06_P2826||www.chem.agilent.com:Database:agp		A_06_P2826	1080759	OLIGO	8.043333346	1.317037036	39	8	1	788			858	175	1	.3693973757	1	1	0	0	0	0	0	0	0	0	1	41.01331	61.43426	1	6.005707	27.29856
789					NOT5	16	W	690104	691786	regulation of transcription from RNA polymerase II promoter*	3'-5'-exoribonuclease activity					YPR072W	YPR072W||ebi.ac.uk:Database:sgd;A_06_P7118||www.chem.agilent.com:Database:agp		A_06_P7118	1082375	OLIGO	8.255000013	1.317037036	40	8	1	789			880	176	1	.0505282804	1	1	0	0	0	0	0	0	0	0	1	1576.122	1809.409	1	23.25934	27.18462
790						12	C	229583	228909	biological process unknown	molecular function unknown					YLR040C	YLR040C||ebi.ac.uk:Database:sgd;A_06_P4852||www.chem.agilent.com:Database:agp		A_06_P4852	1085039	OLIGO	8.46666668	1.317037036	41	8	1	790			900	175	1	.3431309019	1	1	0	0	0	0	0	0	0	0	1	50.47777	58.63927	1	6.280593	27.11284
791					EMP70	12	C	296095	294092	transport	transporter activity					YLR083C	YLR083C||ebi.ac.uk:Database:sgd;A_06_P4895||www.chem.agilent.com:Database:agp		A_06_P4895	1084231	OLIGO	8.678333347	1.317037036	42	8	1	791			922	176	1	.05039236067	1	1	0	0	0	0	0	0	0	0	1	8727.161	6189.487	1	139.3158	27.61417
792					RPS16A	13	W	551927	552902	protein biosynthesis	structural constituent of ribosome					YMR143W	YMR143W||ebi.ac.uk:Database:sgd;A_06_P5575||www.chem.agilent.com:Database:agp		A_06_P5575	1084996	OLIGO	8.890000014	1.317037036	43	8	1	792			943	175	1	.04941549584	1	1	0	0	0	0	0	0	0	0	1	16946.57	19941.76	1	213.3408	26.81273
793					SUI3	16	W	100496	101353	translational initiation	translation initiation factor activity					YPL237W	YPL237W||ebi.ac.uk:Database:sgd;A_06_P6997||www.chem.agilent.com:Database:agp		A_06_P6997	1083102	OLIGO	9.101666681	1.317037036	44	8	1	793			964	176	1	.04918571563	1	1	0	0	0	0	0	0	0	0	1	9887.613	9528.595	1	139.5548	27.03358
794						4	C	625993	625061	biological process unknown	molecular function unknown					YDR090C	YDR090C||ebi.ac.uk:Database:sgd;A_06_P2078||www.chem.agilent.com:Database:agp		A_06_P2078	1086107	OLIGO	9.313333348	1.317037036	45	8	1	794			985	175	1	.0664871094	1	1	0	0	0	0	0	0	0	0	0	938.8611	343.0028	1	19.0541	27.2852
795					PTI1	7	W	800551	801828	mRNA polyadenylylation*	RNA binding					YGR156W	YGR156W||ebi.ac.uk:Database:sgd;A_06_P3377||www.chem.agilent.com:Database:agp		A_06_P3377	1084296	OLIGO	9.525000015	1.317037036	46	8	1	795			1007	176	1	.06434807589	1	1	0	0	0	0	0	0	0	0	1	424.6234	468.7108	1	10.46557	26.95472
796					DMC1	5	W	548416	549512	meiosis*	single-stranded DNA binding*					YER179W	YER179W||ebi.ac.uk:Database:sgd;A_06_P2811||www.chem.agilent.com:Database:agp		A_06_P2811	1085741	OLIGO	9.736666682	1.317037036	47	8	1	796			1028	175	1	.1931940782	1	1	0	0	0	0	0	0	0	0	0	66.47778	142.7857	1	7.534404	27.32975
797					VHS2	9	C	96375	95065	G1/S transition of mitotic cell cycle	molecular function unknown					YIL135C	YIL135C||ebi.ac.uk:Database:sgd;A_06_P3934||www.chem.agilent.com:Database:agp		A_06_P3934	1085625	OLIGO	9.948333349	1.317037036	48	8	1	797			1049	176	1	.05291124465	1	1	0	0	0	0	0	0	0	0	1	975.8805	917.9108	1	20.2299	27.53846
798					ARG1	15	W	219209	220471	arginine biosynthesis*	argininosuccinate synthase activity					YOL058W	YOL058W||ebi.ac.uk:Database:sgd;A_06_P6250||www.chem.agilent.com:Database:agp		A_06_P6250	1083656	OLIGO	10.160000016	1.317037036	49	8	1	798			1070	175	1	.04956127192	1	1	0	0	0	0	0	0	0	0	1	11982.75	14631.87	1	165.4794	27.64576
799					CDC26	6	W	226950	227324	mitotic sister chromatid segregation*	protein binding*					YFR036W	YFR036W||ebi.ac.uk:Database:sgd;A_06_P2934||www.chem.agilent.com:Database:agp		A_06_P2934	1083925	OLIGO	10.371666683	1.317037036	50	8	1	799			1091	176	1	.3301658726	1	1	0	0	0	0	0	0	0	0	0	35.13583	86.0818	1	6.65628	27.10993
800						6	W	836	1363	biological process unknown	molecular function unknown					YFL067W	YFL067W||ebi.ac.uk:Database:sgd;A_06_P2893||www.chem.agilent.com:Database:agp		A_06_P2893	1086790	OLIGO	10.58333335	1.317037036	51	8	1	800			1112	175	1	.1302477134	1	1	0	0	0	0	0	0	0	0	1	156.027	150.6124	1	9.255005	26.80784
801					CAF120	14	W	113269	116451	regulation of transcription from RNA polymerase II promoter	molecular function unknown					YNL278W	YNL278W||ebi.ac.uk:Database:sgd;A_06_P6050||www.chem.agilent.com:Database:agp		A_06_P6050	1082400	OLIGO	10.795000017	1.317037036	52	8	1	801			1133	176	1	.06126966788	1	1	0	0	0	0	0	0	0	0	0	672.914	435.4144	1	12.30552	26.75092
802					APT1	13	W	228937	229500	AMP biosynthesis*	adenine phosphoribosyltransferase activity					YML022W	YML022W||ebi.ac.uk:Database:sgd;A_06_P5312||www.chem.agilent.com:Database:agp		A_06_P5312	1083110	OLIGO	11.006666684	1.317037036	53	8	1	802			1155	175	1	.04943949951	1	1	0	0	0	0	0	0	0	0	1	4831.963	5506.965	1	68.70627	26.55556
803					PHO91	14	C	651712	649028	phosphate transport	phosphate transporter activity					YNR013C	YNR013C||ebi.ac.uk:Database:sgd;A_06_P6124||www.chem.agilent.com:Database:agp		A_06_P6124	1081477	OLIGO	11.218333351	1.317037036	54	8	1	803			1176	175	1	.05480362856	1	1	0	0	0	0	0	0	0	0	0	1137.453	738.2577	1	20.03571	26.80377
804					MKC7	4	C	746096	744306	proteolysis and peptidolysis	aspartic-type signal peptidase activity					YDR144C	YDR144C||ebi.ac.uk:Database:sgd;A_06_P2132||www.chem.agilent.com:Database:agp		A_06_P2132	1084591	OLIGO	11.430000018	1.317037036	55	8	1	804			1197	175	1	.05398991627	1	1	0	0	0	0	0	0	0	0	1	824.447	828.3866	1	18.54696	26.98155
805					MRP21	2	W	48822	49355	protein biosynthesis*	structural constituent of ribosome					YBL090W	YBL090W||ebi.ac.uk:Database:sgd;A_06_P1222||www.chem.agilent.com:Database:agp		A_06_P1222	1083467	OLIGO	11.641666685	1.317037036	56	8	1	805			1218	176	1	.0515293678	1	1	0	0	0	0	0	0	0	0	1	1161.324	1247.834	1	22.93339	27
806						16	C	674697	674311							YPR059C	YPR059C||ebi.ac.uk:Database:sgd;A_06_P7105||www.chem.agilent.com:Database:agp		A_06_P7105	1083573	OLIGO	11.853333352	1.317037036	57	8	1	806			1239	176	1	.3159076543	1	1	0	0	0	0	0	0	0	0	1	58.33496	60.18571	1	7.781205	26.85827
807					STV1	13	W	383302	385974	vacuolar acidification	hydrogen-transporting ATPase activity, rotational mechanism					YMR054W	YMR054W||ebi.ac.uk:Database:sgd;A_06_P5481||www.chem.agilent.com:Database:agp		A_06_P5481	1081017	OLIGO	12.065000019	1.317037036	58	8	1	807			1261	176	1	.05111259531	1	1	0	0	0	0	0	0	0	0	0	4965.294	3263.521	1	74.58852	26.90637
808					HMI1	15	C	141346	139226	mitochondrial genome maintenance	ATP-dependent DNA helicase activity					YOL095C	YOL095C||ebi.ac.uk:Database:sgd;A_06_P6288||www.chem.agilent.com:Database:agp		A_06_P6288	1080970	OLIGO	12.276666686	1.317037036	59	8	1	808			1282	175	1	.05597189999	1	1	0	0	0	0	0	0	0	0	0	635.1968	819.6797	1	18.59343	27.38129
809						6	C	3846	3322	biological process unknown	molecular function unknown					YFL064C	YFL064C||ebi.ac.uk:Database:sgd;A_06_P2890||www.chem.agilent.com:Database:agp		A_06_P2890	1082196	OLIGO	12.488333353	1.317037036	60	8	1	809			1303	176	1	.0749470879	1	1	0	0	0	0	0	0	0	0	1	301.8507	355.9172	1	9.229027	27.14652
810						4	W	174919	176487	biological process unknown	molecular function unknown					YDL156W	YDL156W||ebi.ac.uk:Database:sgd;A_06_P1889||www.chem.agilent.com:Database:agp		A_06_P1889	1080988	OLIGO	12.70000002	1.317037036	61	8	1	810			1324	175	1	.06118422995	1	1	0	0	0	0	0	0	0	0	0	466.7526	565.057	1	12.26112	27.45833
811						9	C	246912	246547							YIL059C	YIL059C||ebi.ac.uk:Database:sgd;A_06_P3859||www.chem.agilent.com:Database:agp		A_06_P3859	1080813	OLIGO	12.911666687	1.317037036	62	8	1	811			1345	176	1	.07050882182	1	1	0	0	0	0	0	0	0	0	1	353.269	379.0769	1	11.40196	26.47426
812					CDC60	16	W	246989	250261	leucyl-tRNA aminoacylation	leucine-tRNA ligase activity					YPL160W	YPL160W||ebi.ac.uk:Database:sgd;A_06_P6919||www.chem.agilent.com:Database:agp		A_06_P6919	1082413	OLIGO	13.123333354	1.317037036	63	8	1	812			1366	175	1	.04918324835	1	1	0	0	0	0	0	1	0	0	1	12354.61	13003.29	1	128.2504	27.08614
813					STE20	8	C	97932	95113	protein amino acid phosphorylation*	protein serine/threonine kinase activity					YHL007C	YHL007C||ebi.ac.uk:Database:sgd;A_06_P3525||www.chem.agilent.com:Database:agp		A_06_P3525	1085525	OLIGO	13.335000021	1.317037036	64	8	1	813			1388	176	1	.05120752346	1	1	0	0	0	0	0	0	0	0	0	1764.221	2535.041	1	34.91929	27.20522
814					MET22	15	C	207175	206102	sulfate assimilation*	3'(2'),5'-bisphosphate nucleotidase activity					YOL064C	YOL064C||ebi.ac.uk:Database:sgd;A_06_P6256||www.chem.agilent.com:Database:agp		A_06_P6256	1082741	OLIGO	13.546666688	1.317037036	65	8	1	814			1409	175	1	.05099569684	1	1	0	0	0	0	0	0	0	0	0	1600.268	2149.453	1	16.76053	26.26838
815					ERG11	8	C	121677	120085	ergosterol biosynthesis	sterol 14-demethylase activity					YHR007C	YHR007C||ebi.ac.uk:Database:sgd;A_06_P3577||www.chem.agilent.com:Database:agp		A_06_P3577	1086033	OLIGO	13.758333355	1.317037036	66	8	1	815			1430	176	1	.04948965645	1	1	0	0	0	0	0	0	0	0	1	7789.446	6585.863	1	75.64353	26.75532
816					TAD3	12	C	766358	765266	tRNA modification	tRNA specific adenosine deaminase activity					YLR316C	YLR316C||ebi.ac.uk:Database:sgd;A_06_P5133||www.chem.agilent.com:Database:agp		A_06_P5133	1081991	OLIGO	13.970000022	1.317037036	67	8	1	816			1451	175	1	.05227720946	1	1	0	0	0	0	0	0	0	0	0	998.4877	1201.507	1	23.74636	26.31481
817						13	C	416052	415687							YMR075C-A	YMR075C-A||ebi.ac.uk:Database:sgd;A_06_P5502||www.chem.agilent.com:Database:agp		A_06_P5502	1085339	OLIGO	14.181666689	1.317037036	68	8	1	817			1472	176	1	.4432831632	1	1	0	0	0	0	0	0	0	0	1	39.32243	44.74433	1	5.741697	26.5
818						15	C	375856	373709	biological process unknown	phospholipase activity					YOR022C	YOR022C||ebi.ac.uk:Database:sgd;A_06_P6384||www.chem.agilent.com:Database:agp		A_06_P6384	1086868	OLIGO	14.393333356	1.317037036	69	8	1	818			1494	175	1	.06842313896	1	1	0	0	0	0	0	0	0	0	1	346.5723	445.2458	1	8.785451	26.34008
819					ECM23	16	W	511099	511662	pseudohyphal growth	molecular function unknown					YPL021W	YPL021W||ebi.ac.uk:Database:sgd;A_06_P6780||www.chem.agilent.com:Database:agp		A_06_P6780	1082770	OLIGO	14.605000023	1.317037036	70	8	1	819			1515	176	1	.5012744503	1	1	0	0	0	0	0	0	0	0	0	28.55703	47.1648	1	4.823588	26.7518
820					BSC1	4	C	385584	384598	biological process unknown	molecular function unknown					YDL037C	YDL037C||ebi.ac.uk:Database:sgd;A_06_P1765||www.chem.agilent.com:Database:agp		A_06_P1765	1083457	OLIGO	14.81666669	1.317037036	71	8	1	820			1536	175	1	.5317753013	1	1	0	0	0	0	0	0	0	0	0	25.21594	46.90673	1	3.856613	26.3197
821					DBP6	14	W	695595	697484	35S primary transcript processing*	ATP-dependent RNA helicase activity					YNR038W	YNR038W||ebi.ac.uk:Database:sgd;A_06_P6151||www.chem.agilent.com:Database:agp		A_06_P6151	1086844	OLIGO	15.028333357	1.317037036	72	8	1	821			1557	176	1	.05648254875	1	1	0	0	0	0	0	0	0	0	0	604.857	874.2767	1	13.20107	26.10989
822					UFE1	15	W	468213	469253	vesicle fusion*	t-SNARE activity					YOR075W	YOR075W||ebi.ac.uk:Database:sgd;A_06_P6437||www.chem.agilent.com:Database:agp		A_06_P6437	1081985	OLIGO	15.240000024	1.317037036	73	8	1	822			1578	175	1	.05316452163	1	1	0	0	0	0	0	0	0	0	1	946.5313	885.5636	1	20.25066	26.17216
823						7	W	359447	360103	biological process unknown	molecular function unknown					YGL079W	YGL079W||ebi.ac.uk:Database:sgd;A_06_P3034||www.chem.agilent.com:Database:agp		A_06_P3034	1083728	OLIGO	15.451666691	1.317037036	74	8	1	823			1599	176	1	.05337648279	1	1	0	0	0	0	0	0	0	0	0	856.0531	1160.772	1	17.07835	25.96739
824						14	W	570476	572314	biological process unknown	molecular function unknown					YNL034W	YNL034W||ebi.ac.uk:Database:sgd;A_06_P5805||www.chem.agilent.com:Database:agp		A_06_P5805	1083421	OLIGO	15.663333358	1.317037036	75	8	1	824			1620	175	1	.5077407723	1	1	0	0	0	0	0	0	0	0	0	35.04275	38.18458	1	6.682061	26.26812
825					RVB2	16	W	103232	104647	regulation of transcription from RNA polymerase II promoter*	ATPase activity					YPL235W	YPL235W||ebi.ac.uk:Database:sgd;A_06_P6995||www.chem.agilent.com:Database:agp		A_06_P6995	1084807	OLIGO	15.875000025	1.317037036	76	8	1	825			1642	176	1	.04944577445	1	1	0	0	0	0	0	0	0	0	1	4648.956	5289.624	1	68.18648	26.47148
826						12	W	704311	704700							YLR279W	YLR279W||ebi.ac.uk:Database:sgd;A_06_P5094||www.chem.agilent.com:Database:agp		A_06_P5094	1083387	OLIGO	16.086666692	1.317037036	77	8	1	826			1663	175	1	.4582873668	1	1	0	0	0	0	0	0	0	0	1	38.34458	42.909	1	5.645835	26.28881
827					ARP1	8	C	364155	363001	establishment of mitotic spindle orientation*	structural constituent of cytoskeleton					YHR129C	YHR129C||ebi.ac.uk:Database:sgd;A_06_P3704||www.chem.agilent.com:Database:agp		A_06_P3704	1086269	OLIGO	16.298333359	1.317037036	78	8	1	827			1684	176	1	.0529876409	1	1	0	0	0	0	0	0	0	0	1	935.6773	928.8978	1	16.31937	26.52593
828						4	W	1345637	1346029							YDR442W	YDR442W||ebi.ac.uk:Database:sgd;A_06_P2435||www.chem.agilent.com:Database:agp		A_06_P2435	1080879	OLIGO	16.510000026	1.317037036	79	8	1	828			1706	175	1	.540693124	1	1	0	0	0	0	0	0	0	0	0	35.82939	32.89618	1	5.459752	26.31636
829						12	W	489574	489930	biological process unknown	molecular function unknown					YLR162W	YLR162W||ebi.ac.uk:Database:sgd;A_06_P4976||www.chem.agilent.com:Database:agp		A_06_P4976	1086245	OLIGO	16.721666693	1.317037036	80	8	1	829			1726	176	1	.04995569383	1	1	0	0	0	0	0	0	0	0	1	5520.726	4266.103	1	58.64608	26.22097
830					TEA1	15	W	954339	956618	transcription	DNA binding					YOR337W	YOR337W||ebi.ac.uk:Database:sgd;A_06_P6701||www.chem.agilent.com:Database:agp		A_06_P6701	1081886	OLIGO	16.93333336	1.317037036	81	8	1	830			1747	175	1	.05476113936	1	1	0	0	0	0	0	0	0	0	0	720.5708	849.6652	1	16.90128	26.01154
831						4	W	296820	298274	biological process unknown	molecular function unknown					YDL089W	YDL089W||ebi.ac.uk:Database:sgd;A_06_P1819||www.chem.agilent.com:Database:agp		A_06_P1819	1083256	OLIGO	17.145000027	1.317037036	82	8	1	831			1768	176	1	.05355486147	1	1	0	0	0	0	0	0	0	0	0	1112.12	830.0896	1	22.77701	25.71269
832					URB2	10	C	513677	510153	ribosome biogenesis*	molecular function unknown					YJR041C	YJR041C||ebi.ac.uk:Database:sgd;A_06_P4284||www.chem.agilent.com:Database:agp		A_06_P4284	1086526	OLIGO	17.356666694	1.317037036	83	8	1	832			1790	175	1	.05402130383	1	1	0	0	0	0	0	0	0	0	1	831.8047	816.0704	1	18.24415	25.46269
833						16	W	718377	718682							YPR092W	YPR092W||ebi.ac.uk:Database:sgd;A_06_P7139||www.chem.agilent.com:Database:agp		A_06_P7139	1081356	OLIGO	17.568333361	1.317037036	84	8	1	833			1811	176	1	.5148925279	1	1	0	0	0	0	0	0	0	0	0	25.78566	48.86968	1	4.543273	25.85507
834						7	C	720658	720269							YGR114C	YGR114C||ebi.ac.uk:Database:sgd;A_06_P3334||www.chem.agilent.com:Database:agp		A_06_P3334	1083936	OLIGO	17.780000028	1.317037036	85	8	1	834			1832	175	1	.5324035621	1	1	0	0	0	0	0	0	0	0	1	35.54397	34.22597	1	6.404516	25.76981
835						5	C	284220	282703	regulation of transcription	molecular function unknown					YER064C	YER064C||ebi.ac.uk:Database:sgd;A_06_P2694||www.chem.agilent.com:Database:agp		A_06_P2694	1084580	OLIGO	17.991666695	1.317037036	86	8	1	835			1853	176	1	.128428588	1	1	0	0	0	0	0	0	0	0	1	138.864	174.7783	1	10.62187	25.88519
836					MKK2	16	C	289033	287513	protein amino acid phosphorylation*	MAP kinase kinase activity					YPL140C	YPL140C||ebi.ac.uk:Database:sgd;A_06_P6899||www.chem.agilent.com:Database:agp		A_06_P6899	1082868	OLIGO	18.203333362	1.317037036	87	8	1	836			1874	175	1	.05567852482	1	1	0	0	0	0	0	0	0	0	1	683.7607	734.2725	1	16.3222	26.28676
837					SAM35	8	W	272628	273617	mitochondrial outer membrane protein import	protein binding					YHR083W	YHR083W||ebi.ac.uk:Database:sgd;A_06_P3658||www.chem.agilent.com:Database:agp		A_06_P3658	1084059	OLIGO	18.415000029	1.317037036	88	8	1	837			1895	176	1	.05085896244	1	1	0	0	0	0	0	0	0	0	0	2586.943	3743.163	1	40.27635	25.83395
838						9	C	200458	200150							YIL086C	YIL086C||ebi.ac.uk:Database:sgd;A_06_P3885||www.chem.agilent.com:Database:agp		A_06_P3885	1084527	OLIGO	18.626666696	1.317037036	89	8	1	838			1916	175	1	.05597624326	1	1	0	0	0	0	0	0	0	0	0	633.5415	834.3374	1	15.28108	25.78292
839					PCD1	12	C	442738	441716	biological process unknown	pyrophosphatase activity					YLR151C	YLR151C||ebi.ac.uk:Database:sgd;A_06_P4965||www.chem.agilent.com:Database:agp		A_06_P4965	1085124	OLIGO	18.838333363	1.317037036	90	8	1	839			1938	177	1	.06373888797	1	1	0	0	0	0	0	0	0	0	1	449.6427	461.486	1	13.4767	25.79245
840					UBP14	2	C	356015	353670	protein deubiquitination*	ubiquitin-specific protease activity					YBR058C	YBR058C||ebi.ac.uk:Database:sgd;A_06_P1305||www.chem.agilent.com:Database:agp		A_06_P1305	1086368	OLIGO	19.05000003	1.317037036	91	8	1	840			1959	175	1	.05284657393	1	1	0	0	0	0	0	0	0	0	0	918.1081	1187.47	1	18.18475	25.53903
841					SIK1	12	W	546099	547613	rRNA modification*	molecular function unknown					YLR197W	YLR197W||ebi.ac.uk:Database:sgd;A_06_P5011||www.chem.agilent.com:Database:agp		A_06_P5011	1080843	OLIGO	19.261666697	1.317037036	92	8	1	841			1980	176	1	.05032876785	1	1	0	0	0	0	0	0	0	0	1	4989.818	6933.323	1	77.74995	25.53815
842					SHG1	2	C	730157	729729	histone methylation	histone lysine N-methyltransferase activity (H3-K4 specific)					YBR258C	YBR258C||ebi.ac.uk:Database:sgd;A_06_P1512||www.chem.agilent.com:Database:agp		A_06_P1512	1085937	OLIGO	19.473333364	1.317037036	93	8	1	842			2001	175	1	.06336603213	1	1	0	0	0	0	0	0	0	0	0	391.6663	614.8807	1	11.94643	25.82353
843					SNZ2	14	W	13267	14163	thiamin biosynthesis*	protein binding					YNL333W	YNL333W||ebi.ac.uk:Database:sgd;A_06_P6105||www.chem.agilent.com:Database:agp		A_06_P6105	1084487	OLIGO	19.685000031	1.317037036	94	8	1	843			2022	177	1	.05704516811	1	1	0	0	0	0	0	0	0	0	0	954.3979	2170.925	1	18.49807	25.57875
844						10	W	32163	33158	biological process unknown	molecular function unknown					YJL213W	YJL213W||ebi.ac.uk:Database:sgd;A_06_P4235||www.chem.agilent.com:Database:agp		A_06_P4235	1082813	OLIGO	19.896666698	1.317037036	95	8	1	844			2043	175	1	.1193041042	1	1	0	0	0	0	0	0	0	0	0	59.41172	609.5403	1	7.680393	25.75177
845						12	W	642629	644338	biological process unknown	molecular function unknown					YLR253W	YLR253W||ebi.ac.uk:Database:sgd;A_06_P5067||www.chem.agilent.com:Database:agp		A_06_P5067	1081115	OLIGO	20.108333365	1.317037036	96	8	1	845			2065	176	1	.05096692179	1	1	0	0	0	0	0	0	0	0	1	1394.906	1345.897	1	31.98393	25.21533
846					ABF1	11	W	226216	228411	DNA replication*	DNA binding*					YKL112W	YKL112W||ebi.ac.uk:Database:sgd;A_06_P4524||www.chem.agilent.com:Database:agp		A_06_P4524	1084431	OLIGO	20.320000032	1.317037036	97	8	1	846			2086	176	1	.04999723367	1	1	0	0	0	0	0	0	0	0	1	1980.428	2041.535	1	26.36981	25.57895
847					POL4	3	C	140930	139182	double-strand break repair via nonhomologous end-joining*	beta DNA polymerase activity					YCR014C	YCR014C||ebi.ac.uk:Database:sgd;A_06_P1635||www.chem.agilent.com:Database:agp		A_06_P1635	1081601	OLIGO	20.531666699	1.317037036	98	8	1	847			2107	176	1	.07441500648	1	1	0	0	0	0	0	0	0	0	1	357.0377	308.2157	1	11.44454	25.59707
848					PDR3	2	W	217473	220403	regulation of transcription from RNA polymerase II promoter*	DNA binding*					YBL005W	YBL005W||ebi.ac.uk:Database:sgd;A_06_P1134||www.chem.agilent.com:Database:agp		A_06_P1134	1084212	OLIGO	20.743333366	1.317037036	99	8	1	848			2129	176	1	.07730922	1	1	0	0	0	0	0	0	0	0	0	436.5576	238.0524	1	11.15293	25.29455
849					PCL6	5	W	272622	273884	regulation of glycogen biosynthesis*	cyclin-dependent protein kinase regulator activity					YER059W	YER059W||ebi.ac.uk:Database:sgd;A_06_P2688||www.chem.agilent.com:Database:agp		A_06_P2688	1086466	OLIGO	20.955000033	1.317037036	100	8	1	849			2150	177	1	.05852474504	1	1	0	0	0	0	0	0	0	0	1	567.6609	597.2527	1	15.28752	25.36704
850						3	C	272859	272311	biological process unknown	molecular function unknown					YCR090C	YCR090C||ebi.ac.uk:Database:sgd;A_06_P1710||www.chem.agilent.com:Database:agp		A_06_P1710	1085930	OLIGO	21.1666667	1.317037036	101	8	1	850			2170	175	1	.05834114566	1	1	0	0	0	0	0	0	0	0	0	526.165	732.2066	1	14.70149	25.53008
851					NUP100	11	W	309844	312723	mRNA-nucleus export*	structural molecule activity					YKL068W	YKL068W||ebi.ac.uk:Database:sgd;A_06_P4478||www.chem.agilent.com:Database:agp		A_06_P4478	1082696	OLIGO	21.378333367	1.317037036	102	8	1	851			2191	177	1	.05818380721	1	1	0	0	0	0	0	0	0	0	0	548.0537	667.0924	1	11.8731	25.40217
852					MER1	14	W	250930	251742	meiosis*	RNA splicing factor activity, transesterification mechanism					YNL210W	YNL210W||ebi.ac.uk:Database:sgd;A_06_P5982||www.chem.agilent.com:Database:agp		A_06_P5982	1086155	OLIGO	21.590000034	1.317037036	103	8	1	852			2213	175	1	.5838458042	1	1	0	0	0	0	0	0	0	0	0	31.94539	31.62401	1	5.445966	25.62692
853					BNS1	7	W	951896	952309	meiosis	molecular function unknown					YGR230W	YGR230W||ebi.ac.uk:Database:sgd;A_06_P3451||www.chem.agilent.com:Database:agp		A_06_P3451	1083424	OLIGO	21.801666701	1.317037036	104	8	1	853			2234	176	1	.06450308373	1	1	0	0	0	0	0	0	0	0	0	533.3145	386.9494	1	15.71202	25.24812
854						14	W	182874	185177	cysteine metabolism*	cysteine-tRNA ligase activity					YNL247W	YNL247W||ebi.ac.uk:Database:sgd;A_06_P6019||www.chem.agilent.com:Database:agp		A_06_P6019	1080862	OLIGO	22.013333368	1.317037036	105	8	1	854			2255	175	1	.04972347476	1	1	0	0	0	0	0	0	0	0	1	3814.25	4643.571	1	60.17298	25.59854
855					COX14	13	C	14754	14542	aerobic respiration*	molecular function unknown					YML129C	YML129C||ebi.ac.uk:Database:sgd;A_06_P5423||www.chem.agilent.com:Database:agp		A_06_P5423	1081065	OLIGO	22.225000035	1.317037036	106	8	1	855			2276	176	1	.1973845509	1	1	0	0	0	0	0	0	0	0	0	63.4697	142.2309	1	8.399208	25.27778
856					SEC6	9	C	235471	233054	cytokinesis*	protein binding					YIL068C	YIL068C||ebi.ac.uk:Database:sgd;A_06_P3868||www.chem.agilent.com:Database:agp		A_06_P3868	1086169	OLIGO	22.436666702	1.317037036	107	8	1	856			2298	176	1	.0514757366	1	1	0	0	0	0	0	0	0	0	0	1178.169	1386.36	1	20.89739	24.34074
857						1	C	39047	38697							YAL056C-A	YAL056C-A||ebi.ac.uk:Database:sgd;A_06_P1081||www.chem.agilent.com:Database:agp		A_06_P1081	1081366	OLIGO	0	1.505185184	1	9	1	857			54	193	1	.3415698527	1	1	0	0	0	0	0	0	0	0	1	44.00324	67.11487	1	6.748293	25.369
858						16	C	697499	697128							YPR077C	YPR077C||ebi.ac.uk:Database:sgd;A_06_P7124||www.chem.agilent.com:Database:agp		A_06_P7124	1080913	OLIGO	.211666667	1.505185184	2	9	1	858			75	194	1	.2336755168	1	1	0	0	0	0	0	0	0	0	0	51.37516	121.6675	1	8.045745	27.13636
859					MIR1	10	C	578104	577169	phosphate transport	inorganic phosphate transporter activity					YJR077C	YJR077C||ebi.ac.uk:Database:sgd;A_06_P4320||www.chem.agilent.com:Database:agp		A_06_P4320	1086599	OLIGO	.423333334	1.505185184	3	9	1	859			97	193	1	.04999333879	1	1	0	0	0	0	0	0	0	0	1	19703.55	14761.98	1	233.8255	26.74815
860						13	C	856792	855398	aerobic respiration	amidase activity					YMR293C	YMR293C||ebi.ac.uk:Database:sgd;A_06_P5733||www.chem.agilent.com:Database:agp		A_06_P5733	1081835	OLIGO	.635000001	1.505185184	4	9	1	860			118	195	1	.05422407924	1	1	0	0	0	0	0	0	0	0	0	759.2085	913.7865	1	18.04583	26.78571
861					SET4	10	W	224972	226654	biological process unknown	molecular function unknown					YJL105W	YJL105W||ebi.ac.uk:Database:sgd;A_06_P4127||www.chem.agilent.com:Database:agp		A_06_P4127	1084811	OLIGO	.846666668	1.505185184	5	9	1	861			139	194	1	.3182757841	1	1	0	0	0	0	0	0	0	0	1	63.49201	54.36541	1	6.934602	26.94203
862						12	C	28305	27409	biological process unknown	molecular function unknown					YLL056C	YLL056C||ebi.ac.uk:Database:sgd;A_06_P4801||www.chem.agilent.com:Database:agp		A_06_P4801	1082336	OLIGO	1.058333335	1.505185184	6	9	1	862			160	194	1	.08834432029	1	1	0	0	0	0	0	0	0	0	1	295.022	217.1433	1	8.626473	26.4053
863						2	C	321609	320416	phospholipid biosynthesis	acyltransferase activity					YBR042C	YBR042C||ebi.ac.uk:Database:sgd;A_06_P1289||www.chem.agilent.com:Database:agp		A_06_P1289	1085038	OLIGO	1.270000002	1.505185184	7	9	1	863			182	194	1	.05222239877	1	1	0	0	0	0	0	0	0	0	1	1071.305	1025.908	1	13.41816	26.68
864					PPZ1	13	C	241536	239458	sodium ion homeostasis	protein serine/threonine phosphatase activity					YML016C	YML016C||ebi.ac.uk:Database:sgd;A_06_P5306||www.chem.agilent.com:Database:agp		A_06_P5306	1086045	OLIGO	1.481666669	1.505185184	8	9	1	864			203	195	1	.05102030135	1	1	0	0	0	0	0	0	0	0	0	1785.113	1415.607	1	31.41071	26.55224
865					SEC7	4	C	802217	796188	ER to Golgi transport*	ARF guanyl-nucleotide exchange factor activity					YDR170C	YDR170C||ebi.ac.uk:Database:sgd;A_06_P2158||www.chem.agilent.com:Database:agp		A_06_P2158	1082712	OLIGO	1.693333336	1.505185184	9	9	1	865			223	193	1	.04941213679	1	1	0	0	0	0	0	0	0	0	1	6251.834	5482.111	1	83.32211	26.27798
866					HDA3	16	C	895760	893793	regulation of transcription, DNA-dependent*	histone deacetylase activity					YPR179C	YPR179C||ebi.ac.uk:Database:sgd;A_06_P7227||www.chem.agilent.com:Database:agp		A_06_P7227	1086427	OLIGO	1.905000003	1.505185184	10	9	1	866			245	195	1	.05293348049	1	1	0	0	0	0	0	0	0	0	1	935.045	943.3406	1	18.58075	26.63235
867					MRPS17	13	C	637003	636290	protein biosynthesis*	structural constituent of ribosome					YMR188C	YMR188C||ebi.ac.uk:Database:sgd;A_06_P5625||www.chem.agilent.com:Database:agp		A_06_P5625	1086319	OLIGO	2.11666667	1.505185184	11	9	1	867			266	194	1	.05080633652	1	1	0	0	0	0	0	0	0	0	1	1429.075	1432.317	1	24.07282	26.23954
868					ERS1	3	C	248811	248029	L-cystine transport	L-cystine transporter activity					YCR075C	YCR075C||ebi.ac.uk:Database:sgd;A_06_P1696||www.chem.agilent.com:Database:agp		A_06_P1696	1085422	OLIGO	2.328333337	1.505185184	12	9	1	868			287	194	1	.05885790945	1	1	0	0	0	0	0	0	0	0	0	1485.929	642.4456	1	21.59461	26.46494
869					GAS2	12	W	816094	817761	biological process unknown	1,3-beta-glucanosyltransferase activity					YLR343W	YLR343W||ebi.ac.uk:Database:sgd;A_06_P5160||www.chem.agilent.com:Database:agp		A_06_P5160	1084243	OLIGO	2.540000004	1.505185184	13	9	1	869			308	194	1	.0972700044	1	1	0	0	0	0	0	0	0	0	0	286.5428	172.1094	1	11.87339	26.34074
870						4	C	425869	425567							YDL016C	YDL016C||ebi.ac.uk:Database:sgd;A_06_P1744||www.chem.agilent.com:Database:agp		A_06_P1744	1083514	OLIGO	2.751666671	1.505185184	14	9	1	870			329	194	1	.4589541895	1	1	0	0	0	0	0	1	0	0	0	28.09534	56.28444	1	4.149076	26.69663
871					RPL15B	13	C	510347	509733	protein biosynthesis	structural constituent of ribosome*					YMR121C	YMR121C||ebi.ac.uk:Database:sgd;A_06_P5551||www.chem.agilent.com:Database:agp		A_06_P5551	1084662	OLIGO	2.963333338	1.505185184	15	9	1	871			351	193	1	.05129107446	1	1	0	0	0	0	0	1	0	0	0	2840.568	4382.572	1	44.20366	26.16226
872						15	W	882761	882838	regulation of protein biosynthesis	translation regulator activity					YOR302W	YOR302W||ebi.ac.uk:Database:sgd;A_06_P6664||www.chem.agilent.com:Database:agp		A_06_P6664	1084486	OLIGO	3.175000005	1.505185184	16	9	1	872			372	194	1	.06060673875	1	1	0	0	0	0	0	0	0	0	0	574.8091	1458.379	1	17.08438	26.60517
873					FKS3	13	W	881158	886515	biological process unknown	1,3-beta-glucan synthase activity					YMR306W	YMR306W||ebi.ac.uk:Database:sgd;A_06_P5749||www.chem.agilent.com:Database:agp		A_06_P5749	1086288	OLIGO	3.386666672	1.505185184	17	9	1	873			393	194	1	.4688541157	1	1	0	0	0	0	0	0	0	0	1	39.85733	39.4591	1	6.746064	26.5122
874						15	C	796793	795801	biological process unknown	oxidoreductase activity					YOR246C	YOR246C||ebi.ac.uk:Database:sgd;A_06_P6607||www.chem.agilent.com:Database:agp		A_06_P6607	1084961	OLIGO	3.598333339	1.505185184	18	9	1	874			414	195	1	.04930454751	1	1	0	0	0	0	0	0	0	0	1	4740.854	4593.169	1	54.753	26.78676
875					THR1	8	W	159430	160503	methionine metabolism*	homoserine kinase activity					YHR025W	YHR025W||ebi.ac.uk:Database:sgd;A_06_P3596||www.chem.agilent.com:Database:agp		A_06_P3596	1086194	OLIGO	3.810000006	1.505185184	19	9	1	875			436	193	1	.05012541632	1	1	0	0	0	0	0	0	0	0	1	3412.571	2668.09	1	41.91477	27.12548
876					SIN4	14	W	206929	209853	transcription from RNA polymerase II promoter	RNA polymerase II transcription mediator activity					YNL236W	YNL236W||ebi.ac.uk:Database:sgd;A_06_P6008||www.chem.agilent.com:Database:agp		A_06_P6008	1081951	OLIGO	4.021666673	1.505185184	20	9	1	876			457	195	1	.05023010943	1	1	0	0	0	0	0	0	0	0	1	2020.217	2469.097	1	33.70095	26.74812
877					YNG2	8	C	284626	283778	chromatin modification	enzyme activator activity					YHR090C	YHR090C||ebi.ac.uk:Database:sgd;A_06_P3665||www.chem.agilent.com:Database:agp		A_06_P3665	1081690	OLIGO	4.23333334	1.505185184	21	9	1	877			477	194	1	.05466304614	1	1	0	0	0	0	0	0	0	0	1	787.3798	758.5581	1	14.92706	26.61993
878					ASH1	11	W	94504	96270	pseudohyphal growth*	specific transcriptional repressor activity					YKL185W	YKL185W||ebi.ac.uk:Database:sgd;A_06_P4598||www.chem.agilent.com:Database:agp		A_06_P4598	1086460	OLIGO	4.445000007	1.505185184	22	9	1	878			498	195	1	.04930557215	1	1	0	0	0	0	0	0	0	0	1	4766.42	4602.892	1	55.92525	26.58364
879					SUE1	16	C	831671	831051	protein catabolism	molecular function unknown					YPR151C	YPR151C||ebi.ac.uk:Database:sgd;A_06_P7199||www.chem.agilent.com:Database:agp		A_06_P7199	1081013	OLIGO	4.656666674	1.505185184	23	9	1	879			520	194	1	.07672728934	1	1	0	0	0	0	0	0	0	0	1	317.5465	310.0957	1	8.774946	26.96763
880					SMC6	12	W	885288	888632	DNA repair*	molecular function unknown					YLR383W	YLR383W||ebi.ac.uk:Database:sgd;A_06_P5201||www.chem.agilent.com:Database:agp		A_06_P5201	1084721	OLIGO	4.868333341	1.505185184	24	9	1	880			541	195	1	.05386004393	1	1	0	0	0	0	0	0	0	0	0	1011.902	790.4925	1	18.39329	26.63838
881						3	C	209605	208130	biological process unknown	serine-type peptidase activity					YCR045C	YCR045C||ebi.ac.uk:Database:sgd;A_06_P1671||www.chem.agilent.com:Database:agp		A_06_P1671	1082233	OLIGO	5.080000008	1.505185184	25	9	1	881			562	194	1	.437022422	1	1	0	0	0	0	0	0	0	0	1	40.66675	44.55876	1	6.540502	26.73646
882					RNA1	13	C	742734	741511	rRNA-nucleus export*	Ran GTPase activator activity					YMR235C	YMR235C||ebi.ac.uk:Database:sgd;A_06_P5674||www.chem.agilent.com:Database:agp		A_06_P5674	1080738	OLIGO	5.291666675	1.505185184	26	9	1	882			583	195	1	.04933773819	1	1	0	0	0	0	0	0	0	0	1	5711.144	6326.283	1	80.85698	26.70609
883					INO2	4	C	699463	698549	positive regulation of transcription from RNA polymerase II promoter*	specific RNA polymerase II transcription factor activity					YDR123C	YDR123C||ebi.ac.uk:Database:sgd;A_06_P2111||www.chem.agilent.com:Database:agp		A_06_P2111	1081894	OLIGO	5.503333342	1.505185184	27	9	1	883			604	194	1	.08755229628	1	1	0	0	0	0	0	0	0	0	1	257.2078	253.1683	1	10.24032	26.91635
884						15	C	198724	197219	biological process unknown	molecular function unknown					YOL070C	YOL070C||ebi.ac.uk:Database:sgd;A_06_P6262||www.chem.agilent.com:Database:agp		A_06_P6262	1082054	OLIGO	5.715000009	1.505185184	28	9	1	884			626	195	1	.05228052096	1	1	0	0	0	0	0	0	0	0	0	1768.99	1189.564	1	21.20506	27.04869
885					ARG3	10	W	268715	269731	arginine biosynthesis*	ornithine carbamoyltransferase activity					YJL088W	YJL088W||ebi.ac.uk:Database:sgd;A_06_P4110||www.chem.agilent.com:Database:agp		A_06_P4110	1084880	OLIGO	5.926666676	1.505185184	29	9	1	885			647	193	1	.04962123981	1	1	0	0	0	0	0	0	0	0	1	2682.764	2657.992	1	38.58698	27.80309
886					BRE5	14	C	718327	716780	protein deubiquitination	molecular function unknown					YNR051C	YNR051C||ebi.ac.uk:Database:sgd;A_06_P6164||www.chem.agilent.com:Database:agp		A_06_P6164	1085837	OLIGO	6.138333343	1.505185184	30	9	1	886			668	195	1	.05074149182	1	1	0	0	0	0	0	0	0	0	1	1618.373	1439.266	1	23.01227	27.27737
887					COS2	2	C	811473	810334	biological process unknown	molecular function unknown					YBR302C	YBR302C||ebi.ac.uk:Database:sgd;A_06_P1556||www.chem.agilent.com:Database:agp		A_06_P1556	1085055	OLIGO	6.35000001	1.505185184	31	9	1	887			689	194	1	.04915832203	1	1	0	0	0	0	0	0	0	0	1	12437.66	12326.76	1	135.7731	27.24638
888					HXT3	4	C	1164652	1162949	hexose transport	glucose transporter activity*					YDR345C	YDR345C||ebi.ac.uk:Database:sgd;A_06_P2336||www.chem.agilent.com:Database:agp		A_06_P2336	1086770	OLIGO	6.561666677	1.505185184	32	9	1	888			710	195	1	.04920902317	1	1	0	0	0	0	0	0	0	0	1	13018.65	14010.61	1	110.6694	27.5
889					GOT1	13	W	854794	855292	ER to Golgi transport*	molecular function unknown					YMR292W	YMR292W||ebi.ac.uk:Database:sgd;A_06_P5732||www.chem.agilent.com:Database:agp		A_06_P5732	1081452	OLIGO	6.773333344	1.505185184	33	9	1	889			732	194	1	.0502526272	1	1	0	0	0	0	0	0	0	0	1	1988.947	1767.887	1	29.73137	27.81679
890					ATG7	8	W	445712	447604	protein-vacuolar targeting*	ubiquitin-like conjugating enzyme activity					YHR171W	YHR171W||ebi.ac.uk:Database:sgd;A_06_P3749||www.chem.agilent.com:Database:agp		A_06_P3749	1081455	OLIGO	6.985000011	1.505185184	34	9	1	890			753	195	1	.07477485724	1	1	0	0	0	0	0	0	0	0	0	464.642	254.1313	1	12.28753	27.91209
891					RPL35A	4	W	117665	118518	protein biosynthesis	structural constituent of ribosome					YDL191W	YDL191W||ebi.ac.uk:Database:sgd;A_06_P1926||www.chem.agilent.com:Database:agp		A_06_P1926	1082799	OLIGO	7.196666678	1.505185184	35	9	1	891			774	194	1	.04950889608	1	1	0	0	0	0	0	0	0	0	1	12642.42	15239.73	1	171.3542	27.71739
892					ARP4	10	C	285187	283718	regulation of transcription from RNA polymerase II promoter*	chromatin binding*					YJL081C	YJL081C||ebi.ac.uk:Database:sgd;A_06_P4103||www.chem.agilent.com:Database:agp		A_06_P4103	1081277	OLIGO	7.408333345	1.505185184	36	9	1	892			795	194	1	.05115945629	1	1	0	0	0	0	0	0	0	0	1	1350.194	1270.219	1	24.6093	26.92308
893					MRPL13	11	C	450860	450066	protein biosynthesis	structural constituent of ribosome					YKR006C	YKR006C||ebi.ac.uk:Database:sgd;A_06_P4643||www.chem.agilent.com:Database:agp		A_06_P4643	1085294	OLIGO	7.620000012	1.505185184	37	9	1	893			816	194	1	.05294029591	1	1	0	0	0	0	0	0	0	0	0	1463.76	2520.649	1	25.38269	27.48905
894					SQT1	9	W	378483	379778	ribosomal large subunit assembly and maintenance	molecular function unknown					YIR012W	YIR012W||ebi.ac.uk:Database:sgd;A_06_P3988||www.chem.agilent.com:Database:agp		A_06_P3988	1081456	OLIGO	7.831666679	1.505185184	38	9	1	894			838	195	1	.05016979784	1	1	0	0	0	0	0	0	0	0	0	3349.483	4439.719	1	32.65581	27.36101
895					RRP42	4	C	264110	263313	35S primary transcript processing*	3'-5'-exoribonuclease activity					YDL111C	YDL111C||ebi.ac.uk:Database:sgd;A_06_P1841||www.chem.agilent.com:Database:agp		A_06_P1841	1080808	OLIGO	8.043333346	1.505185184	39	9	1	895			859	194	1	.05206037429	1	1	0	0	0	0	0	0	0	0	1	1090.034	1061.964	1	15.93801	27.1573
896					YOS9	4	W	565924	567552	ER to Golgi transport	protein transporter activity					YDR057W	YDR057W||ebi.ac.uk:Database:sgd;A_06_P2044||www.chem.agilent.com:Database:agp		A_06_P2044	1081654	OLIGO	8.255000013	1.505185184	40	9	1	896			880	195	1	.05536064279	1	1	0	0	0	0	0	0	0	0	0	678.1674	1002.79	1	19.6822	27.39925
897					RSF1	13	W	330792	331922	aerobic respiration*	molecular function unknown					YMR030W	YMR030W||ebi.ac.uk:Database:sgd;A_06_P5458||www.chem.agilent.com:Database:agp		A_06_P5458	1084368	OLIGO	8.46666668	1.505185184	41	9	1	897			900	194	1	.07300423577	1	1	0	0	0	0	0	0	0	0	1	367.3869	320.7882	1	11.56015	27.72694
898					RHO3	9	W	139749	140444	actin filament organization*	GTPase activity*					YIL118W	YIL118W||ebi.ac.uk:Database:sgd;A_06_P3917||www.chem.agilent.com:Database:agp		A_06_P3917	1086391	OLIGO	8.678333347	1.505185184	42	9	1	898			922	195	1	.05172576485	1	1	0	0	0	0	0	0	0	0	0	1750.453	1261.813	1	24.46364	27.28295
899					AVO2	13	W	406303	407583	regulation of cell growth	molecular function unknown					YMR068W	YMR068W||ebi.ac.uk:Database:sgd;A_06_P5495||www.chem.agilent.com:Database:agp		A_06_P5495	1084972	OLIGO	8.890000014	1.505185184	43	9	1	899			943	194	1	.08128667068	1	1	0	0	0	0	0	0	0	0	0	223.3907	383.1163	1	9.851613	27.60072
900					RRP12	16	W	529720	533406	processing of 20S pre-rRNA*	molecular function unknown					YPL012W	YPL012W||ebi.ac.uk:Database:sgd;A_06_P6771||www.chem.agilent.com:Database:agp		A_06_P6771	1085506	OLIGO	9.101666681	1.505185184	44	9	1	900			964	195	1	.05041935615	1	1	0	0	0	0	0	0	0	0	0	2908.968	3977.598	1	41.23216	27.52471
901					SEC59	13	C	296737	295178	protein amino acid glycosylation*	dolichol kinase activity					YMR013C	YMR013C||ebi.ac.uk:Database:sgd;A_06_P5440||www.chem.agilent.com:Database:agp		A_06_P5440	1084981	OLIGO	9.313333348	1.505185184	45	9	1	901			986	194	1	.05303922332	1	1	0	0	0	0	0	0	0	0	0	1212.789	901.6128	1	24.29719	26.97026
902					HPR1	4	W	730573	732831	mRNA-nucleus export*	nucleic acid binding					YDR138W	YDR138W||ebi.ac.uk:Database:sgd;A_06_P2126||www.chem.agilent.com:Database:agp		A_06_P2126	1081105	OLIGO	9.525000015	1.505185184	46	9	1	902			1007	195	1	.05547763815	1	1	0	0	0	0	0	0	0	0	1	727.8498	708.7157	1	14.20239	27.11069
903					SET5	8	C	516484	514904	biological process unknown	molecular function unknown					YHR207C	YHR207C||ebi.ac.uk:Database:sgd;A_06_P3785||www.chem.agilent.com:Database:agp		A_06_P3785	1082755	OLIGO	9.736666682	1.505185184	47	9	1	903			1028	194	1	.05034343476	1	1	0	0	0	0	0	0	0	0	1	1839.146	1672.069	1	31.14878	27.05147
904					SWD2	11	W	403745	404734	histone methylation*	histone lysine N-methyltransferase activity (H3-K4 specific)					YKL018W	YKL018W||ebi.ac.uk:Database:sgd;A_06_P4426||www.chem.agilent.com:Database:agp		A_06_P4426	1080834	OLIGO	9.948333349	1.505185184	48	9	1	904			1049	195	1	.06088518936	1	1	0	0	0	0	0	0	0	0	0	587.1828	467.4287	1	13.95155	27.5471
905						7	C	112009	111704							YGL204C	YGL204C||ebi.ac.uk:Database:sgd;A_06_P3159||www.chem.agilent.com:Database:agp		A_06_P3159	1085915	OLIGO	10.160000016	1.505185184	49	9	1	905			1070	194	1	.1663099306	1	1	0	0	0	0	0	0	0	0	1	119.099	113.7151	1	9.063377	27.41538
906						4	C	583462	582788	biological process unknown	molecular function unknown					YDR067C	YDR067C||ebi.ac.uk:Database:sgd;A_06_P2054||www.chem.agilent.com:Database:agp		A_06_P2054	1081206	OLIGO	10.371666683	1.505185184	50	9	1	906			1091	195	1	.08214266692	1	1	0	0	0	0	0	0	0	0	1	233.6629	345.7642	1	9.117114	26.94118
907						14	W	424155	424583							YNL105W	YNL105W||ebi.ac.uk:Database:sgd;A_06_P5876||www.chem.agilent.com:Database:agp		A_06_P5876	1082949	OLIGO	10.58333335	1.505185184	51	9	1	907			1113	194	1	.5465837696	1	1	0	0	0	0	0	0	0	0	0	25.55761	44.08937	1	3.947717	26.81481
908					TFP1	4	W	126788	130003	vacuolar acidification*	hydrogen-transporting ATPase activity, rotational mechanism*					YDL185W	YDL185W||ebi.ac.uk:Database:sgd;A_06_P1920||www.chem.agilent.com:Database:agp		A_06_P1920	1083194	OLIGO	10.795000017	1.505185184	52	9	1	908			1134	195	1	.05051575935	1	1	0	0	0	0	0	0	0	0	1	48939.42	33826.41	1	614.0066	26.97348
909						16	C	218362	216011	biological process unknown	receptor activity					YPL176C	YPL176C||ebi.ac.uk:Database:sgd;A_06_P6935||www.chem.agilent.com:Database:agp		A_06_P6935	1086727	OLIGO	11.006666684	1.505185184	53	9	1	909			1155	194	1	.05014449928	1	1	0	0	0	0	0	0	0	0	1	1824.737	1901.461	1	35.57827	27.17978
910					GAT2	13	W	541198	542880	transcription	transcription factor activity					YMR136W	YMR136W||ebi.ac.uk:Database:sgd;A_06_P5568||www.chem.agilent.com:Database:agp		A_06_P5568	1084881	OLIGO	11.218333351	1.505185184	54	9	1	910			1176	195	1	.0507737288	1	1	0	0	0	0	0	0	0	0	0	1559.069	1957.833	1	26.86877	27.3321
911						14	C	51687	49396	ubiquitin-dependent protein catabolism	protein binding					YNL311C	YNL311C||ebi.ac.uk:Database:sgd;A_06_P6083||www.chem.agilent.com:Database:agp		A_06_P6083	1086174	OLIGO	11.430000018	1.505185184	55	9	1	911			1197	194	1	.05090916917	1	1	0	0	0	0	0	0	0	0	1	1468.633	1358.06	1	24.94596	26.92803
912						16	C	283002	282685							YPL142C	YPL142C||ebi.ac.uk:Database:sgd;A_06_P6901||www.chem.agilent.com:Database:agp		A_06_P6901	1082032	OLIGO	11.641666685	1.505185184	56	9	1	912			1219	195	1	.05333479012	1	1	0	0	0	0	0	0	0	0	0	921.0399	1380.684	1	15.64118	27.02264
913					MRPL33	13	W	841941	842201	protein biosynthesis	structural constituent of ribosome					YMR286W	YMR286W||ebi.ac.uk:Database:sgd;A_06_P5725||www.chem.agilent.com:Database:agp		A_06_P5725	1081859	OLIGO	11.853333352	1.505185184	57	9	1	913			1239	193	1	.08578744178	1	1	0	0	0	0	0	0	0	0	1	233.6881	298.0106	1	10.01491	26.82288
914					MRP1	4	W	1169170	1170135	protein biosynthesis	structural constituent of ribosome					YDR347W	YDR347W||ebi.ac.uk:Database:sgd;A_06_P2338||www.chem.agilent.com:Database:agp		A_06_P2338	1080873	OLIGO	12.065000019	1.505185184	58	9	1	914			1260	194	1	.05205341288	1	1	0	0	0	0	0	0	0	0	0	1706.905	2732.969	1	24.09897	26.69286
915					OGG1	13	W	151871	153001	DNA repair*	purine-specific oxidized base lesion DNA N-glycosylase activity					YML060W	YML060W||ebi.ac.uk:Database:sgd;A_06_P5349||www.chem.agilent.com:Database:agp		A_06_P5349	1081539	OLIGO	12.276666686	1.505185184	59	9	1	915			1282	194	1	.06500109181	1	1	0	0	0	0	0	0	0	0	0	364.1679	578.0656	1	9.782736	26.84058
916					CDC27	2	C	69442	67166	mitotic sister chromatid segregation*	protein binding*					YBL084C	YBL084C||ebi.ac.uk:Database:sgd;A_06_P1216||www.chem.agilent.com:Database:agp		A_06_P1216	1081994	OLIGO	12.488333353	1.505185184	60	9	1	916			1303	196	1	.05946074151	1	1	0	0	0	0	0	0	0	0	1	555.4934	548.9933	1	11.35164	26.80827
917					EST1	12	C	609526	607427	telomerase-dependent telomere maintenance	RNA binding*					YLR233C	YLR233C||ebi.ac.uk:Database:sgd;A_06_P5047||www.chem.agilent.com:Database:agp		A_06_P5047	1084893	OLIGO	12.70000002	1.505185184	61	9	1	917			1324	194	1	.05046197804	1	1	0	0	0	0	0	0	0	0	1	1584.581	1658.349	1	27.77744	27.0709
918					CSR1	12	W	878282	879508	cell wall organization and biogenesis*	phosphatidylinositol transporter activity					YLR380W	YLR380W||ebi.ac.uk:Database:sgd;A_06_P5198||www.chem.agilent.com:Database:agp		A_06_P5198	1083058	OLIGO	12.911666687	1.505185184	62	9	1	918			1345	195	1	.05029989696	1	1	0	0	0	0	0	0	0	0	0	1971.911	2435.836	1	24.27501	26.81919
919					RAM2	11	W	402211	403161	peptide pheromone maturation*	protein farnesyltransferase activity*					YKL019W	YKL019W||ebi.ac.uk:Database:sgd;A_06_P4427||www.chem.agilent.com:Database:agp		A_06_P4427	1083183	OLIGO	13.123333354	1.505185184	63	9	1	919			1366	194	1	.04991413259	1	1	0	0	0	0	0	0	0	0	1	2477.249	2197.439	1	34.93929	26.82824
920						12	W	604576	604881							YLR230W	YLR230W||ebi.ac.uk:Database:sgd;A_06_P5044||www.chem.agilent.com:Database:agp		A_06_P5044	1081478	OLIGO	13.335000021	1.505185184	64	9	1	920			1387	195	1	.30588351	1	1	0	0	0	0	0	0	0	0	1	55.60454	67.28645	1	7.47719	26.65779
921					TRK1	10	C	177224	173517	potassium ion homeostasis	potassium ion transporter activity					YJL129C	YJL129C||ebi.ac.uk:Database:sgd;A_06_P4150||www.chem.agilent.com:Database:agp		A_06_P4150	1083463	OLIGO	13.546666688	1.505185184	65	9	1	921			1409	194	1	.05145085176	1	1	0	0	0	0	0	0	0	0	1	1234	1194.728	1	19.39942	26.49446
922					MAK21	4	W	570645	573722	ribosomal large subunit assembly and maintenance	molecular function unknown					YDR060W	YDR060W||ebi.ac.uk:Database:sgd;A_06_P2047||www.chem.agilent.com:Database:agp		A_06_P2047	1084522	OLIGO	13.758333355	1.505185184	66	9	1	922			1430	195	1	.04984390996	1	1	0	0	0	0	0	0	0	0	1	2324.885	2616.392	1	41.54485	26.56569
923					NFT1	11	W	652718	656374	transport	ATPase activity, coupled to transmembrane movement of substances					YKR103W	YKR103W||ebi.ac.uk:Database:sgd;A_06_P4741||www.chem.agilent.com:Database:agp		A_06_P4741	1082839	OLIGO	13.970000022	1.505185184	67	9	1	923			1452	194	1	.5379071139	1	1	0	0	0	0	0	0	0	0	0	35.63123	33.43422	1	5.883137	26.29818
924					KAR9	16	W	33013	34947	nuclear migration, microtubule-mediated	molecular function unknown					YPL269W	YPL269W||ebi.ac.uk:Database:sgd;A_06_P7030||www.chem.agilent.com:Database:agp		A_06_P7030	1081351	OLIGO	14.181666689	1.505185184	68	9	1	924			1472	195	1	.1179683831	1	1	0	0	0	0	0	0	0	0	1	178.5251	166.5186	1	9.066832	26.30216
925					BUB2	13	C	387020	386100	mitotic spindle checkpoint	GTPase activator activity					YMR055C	YMR055C||ebi.ac.uk:Database:sgd;A_06_P5482||www.chem.agilent.com:Database:agp		A_06_P5482	1084342	OLIGO	14.393333356	1.505185184	69	9	1	925			1493	194	1	.07431650688	1	1	0	0	0	0	0	0	0	0	0	472.6322	256.6917	1	11.58142	26.5
926					MUM3	15	W	875596	877035	spore wall assembly (sensu Fungi)*	acyltransferase activity					YOR298W	YOR298W||ebi.ac.uk:Database:sgd;A_06_P6660||www.chem.agilent.com:Database:agp		A_06_P6660	1082679	OLIGO	14.605000023	1.505185184	70	9	1	926			1514	196	1	.2506837005	1	1	0	0	0	0	0	0	0	0	1	68.67235	82.22029	1	7.75895	26.54779
927					THR4	3	W	216692	218236	endocytosis*	threonine synthase activity					YCR053W	YCR053W||ebi.ac.uk:Database:sgd;A_06_P1679||www.chem.agilent.com:Database:agp		A_06_P1679	1081180	OLIGO	14.81666669	1.505185184	71	9	1	927			1536	194	1	.04928857472	1	1	0	0	0	0	0	0	0	0	1	15149.6	13494.65	1	210.4217	26.38376
928					APP1	14	W	447611	449374	actin filament organization*	molecular function unknown					YNL094W	YNL094W||ebi.ac.uk:Database:sgd;A_06_P5865||www.chem.agilent.com:Database:agp		A_06_P5865	1084495	OLIGO	15.028333357	1.505185184	72	9	1	928			1557	195	1	.05785570623	1	1	0	0	0	0	0	0	0	0	0	549.2229	720.3271	1	13.75002	26.57194
929					STE11	12	W	849865	852018	protein amino acid phosphorylation*	MAP kinase kinase kinase activity					YLR362W	YLR362W||ebi.ac.uk:Database:sgd;A_06_P5179||www.chem.agilent.com:Database:agp		A_06_P5179	1085517	OLIGO	15.240000024	1.505185184	73	9	1	929			1578	194	1	.05423262646	1	1	0	0	0	0	0	0	0	0	1	816.5023	795.6867	1	14.77768	26.31461
930					LIN1	8	C	412408	411386	biological process unknown	protein binding					YHR156C	YHR156C||ebi.ac.uk:Database:sgd;A_06_P3734||www.chem.agilent.com:Database:agp		A_06_P3734	1082368	OLIGO	15.451666691	1.505185184	74	9	1	930			1599	195	1	.1176713695	1	1	0	0	0	0	0	0	0	0	1	167.9619	178.0738	1	9.026839	26.1145
931						12	W	493885	494391	biological process unknown	molecular function unknown					YLR164W	YLR164W||ebi.ac.uk:Database:sgd;A_06_P4978||www.chem.agilent.com:Database:agp		A_06_P4978	1083704	OLIGO	15.663333358	1.505185184	75	9	1	931			1620	194	1	.06237203954	1	1	0	0	0	0	0	0	0	0	0	621.5765	414.1984	1	12.42672	26.14909
932						8	W	280821	281156	RNA metabolism	molecular function unknown					YHR087W	YHR087W||ebi.ac.uk:Database:sgd;A_06_P3662||www.chem.agilent.com:Database:agp		A_06_P3662	1084697	OLIGO	15.875000025	1.505185184	76	9	1	932			1641	194	1	.07102813707	1	1	0	0	0	0	0	0	0	0	0	267.6819	722.4752	1	11.95802	25.87279
933					IES1	6	C	109924	107846	chromatin remodeling	molecular function unknown					YFL013C	YFL013C||ebi.ac.uk:Database:sgd;A_06_P2837||www.chem.agilent.com:Database:agp		A_06_P2837	1082749	OLIGO	16.086666692	1.505185184	77	9	1	933			1663	194	1	.05646938738	1	1	0	0	0	0	0	0	0	0	1	702.1455	636.2367	1	11.93321	26.76426
934					APC5	15	C	800731	798674	mitotic sister chromatid segregation*	protein binding*					YOR249C	YOR249C||ebi.ac.uk:Database:sgd;A_06_P6610||www.chem.agilent.com:Database:agp		A_06_P6610	1083516	OLIGO	16.298333359	1.505185184	78	9	1	934			1684	195	1	.05326473774	1	1	0	0	0	0	0	0	0	0	1	869.9433	943.8041	1	17.72197	26.49808
935					FAR1	10	C	126245	123753	signal transduction during conjugation with cellular fusion*	cyclin-dependent protein kinase inhibitor activity					YJL157C	YJL157C||ebi.ac.uk:Database:sgd;A_06_P4179||www.chem.agilent.com:Database:agp		A_06_P4179	1081845	OLIGO	16.510000026	1.505185184	79	9	1	935			1706	194	1	.0507094198	1	1	0	0	0	0	0	0	0	0	0	1637.488	2078.403	1	22.27066	26.42803
936						10	W	586314	586664							YJR087W	YJR087W||ebi.ac.uk:Database:sgd;A_06_P4329||www.chem.agilent.com:Database:agp		A_06_P4329	1082891	OLIGO	16.721666693	1.505185184	80	9	1	936			1726	195	1	.1436907696	1	1	0	0	0	0	0	0	0	0	1	152.3929	122.9014	1	6.984042	26.58633
937					SRP21	11	C	212644	212141	protein-ER targeting*	signal sequence binding					YKL122C	YKL122C||ebi.ac.uk:Database:sgd;A_06_P4534||www.chem.agilent.com:Database:agp		A_06_P4534	1081746	OLIGO	16.93333336	1.505185184	81	9	1	937			1747	194	1	.05877208839	1	1	0	0	0	0	0	0	0	0	0	524.6022	655.7849	1	11.09308	26.36131
938					DAD4	4	C	1108493	1108275	mitotic spindle organization and biogenesis in nucleus*	protein binding					YDR320C-A	YDR320C-A||ebi.ac.uk:Database:sgd;A_06_P2310||www.chem.agilent.com:Database:agp		A_06_P2310	1084803	OLIGO	17.145000027	1.505185184	82	9	1	938			1768	195	1	.05229614211	1	1	0	0	0	0	0	0	0	0	0	1000.414	1237.337	1	23.18025	26.22222
939					DOP1	4	C	739992	734896	cellular morphogenesis	molecular function unknown					YDR141C	YDR141C||ebi.ac.uk:Database:sgd;A_06_P2129||www.chem.agilent.com:Database:agp		A_06_P2129	1081431	OLIGO	17.356666694	1.505185184	83	9	1	939			1790	194	1	.04972572703	1	1	0	0	0	0	0	0	0	0	1	2417.495	2421.266	1	54.25825	26.13109
940					SNQ2	4	W	465916	470421	response to drug*	xenobiotic-transporting ATPase activity					YDR011W	YDR011W||ebi.ac.uk:Database:sgd;A_06_P1996||www.chem.agilent.com:Database:agp		A_06_P1996	1082236	OLIGO	17.568333361	1.505185184	84	9	1	940			1811	195	1	.04988763186	1	1	0	0	0	0	0	0	0	0	1	3111.673	2600.518	1	40.06372	26.0438
941					GPI11	4	W	1067725	1068384	GPI anchor biosynthesis	phosphoethanolamine N-methyltransferase activity					YDR302W	YDR302W||ebi.ac.uk:Database:sgd;A_06_P2291||www.chem.agilent.com:Database:agp		A_06_P2291	1084065	OLIGO	17.780000028	1.505185184	85	9	1	941			1832	195	1	.05259806523	1	1	0	0	0	0	0	0	0	0	0	1317.177	978.4667	1	24.95953	25.98893
942						15	C	31605	28702	cell wall organization and biogenesis	glucosidase activity					YOL155C	YOL155C||ebi.ac.uk:Database:sgd;A_06_P6348||www.chem.agilent.com:Database:agp		A_06_P6348	1086218	OLIGO	17.991666695	1.505185184	86	9	1	942			1853	195	1	.05672924531	1	1	0	0	0	0	0	0	0	0	1	73887.13	30326.83	1	1034.037	26.12857
943					GYL1	13	W	647117	649279	ER to Golgi transport*	protein binding					YMR192W	YMR192W||ebi.ac.uk:Database:sgd;A_06_P5629||www.chem.agilent.com:Database:agp		A_06_P5629	1085472	OLIGO	18.203333362	1.505185184	87	9	1	943			1874	194	1	.06145527453	1	1	0	0	0	0	0	0	0	0	1	543.1593	468.7129	1	14.60801	25.88364
944					RAD23	5	C	82603	81407	ER-associated protein catabolism*	damaged DNA binding					YEL037C	YEL037C||ebi.ac.uk:Database:sgd;A_06_P2578||www.chem.agilent.com:Database:agp		A_06_P2578	1082325	OLIGO	18.415000029	1.505185184	88	9	1	944			1896	195	1	.05257564989	1	1	0	0	0	0	0	0	0	0	0	3465.452	6162.378	1	36.14364	25.73063
945					AVT3	11	W	171788	173866	neutral amino acid transport	neutral amino acid transporter activity					YKL146W	YKL146W||ebi.ac.uk:Database:sgd;A_06_P4558||www.chem.agilent.com:Database:agp		A_06_P4558	1081251	OLIGO	18.626666696	1.505185184	89	9	1	945			1917	194	1	.05495309395	1	1	0	0	0	0	0	0	0	0	0	1305.715	774.5374	1	19.46218	25.99267
946						13	C	777922	777614							YMR254C	YMR254C||ebi.ac.uk:Database:sgd;A_06_P5693||www.chem.agilent.com:Database:agp		A_06_P5693	1083316	OLIGO	18.838333363	1.505185184	90	9	1	946			1938	194	1	.5493603685	1	1	0	0	0	0	0	0	0	0	0	24.41607	45.36806	1	4.258738	25.97692
947						12	W	183622	184161	biological process unknown	molecular function unknown					YLR021W	YLR021W||ebi.ac.uk:Database:sgd;A_06_P4833||www.chem.agilent.com:Database:agp		A_06_P4833	1085237	OLIGO	19.05000003	1.505185184	91	9	1	947			1959	194	1	.05350832263	1	1	0	0	0	0	0	0	0	0	0	895.9802	1352.082	1	14.18012	25.57778
948					TRS23	4	W	954282	954941	ER to Golgi transport	molecular function unknown					YDR246W	YDR246W||ebi.ac.uk:Database:sgd;A_06_P2235||www.chem.agilent.com:Database:agp		A_06_P2235	1083625	OLIGO	19.261666697	1.505185184	92	9	1	948			1980	195	1	.05637013929	1	1	0	0	0	0	0	0	0	0	0	619.4658	765.7623	1	15.71953	25.61993
949					KOG1	8	C	480671	475998	biological process unknown	molecular function unknown					YHR186C	YHR186C||ebi.ac.uk:Database:sgd;A_06_P3764||www.chem.agilent.com:Database:agp		A_06_P3764	1084784	OLIGO	19.473333364	1.505185184	93	9	1	949			2001	194	1	.05314290931	1	1	0	0	0	0	0	0	0	0	1	923.0016	904.5574	1	17.17857	26.09259
950					ADA2	4	W	1356055	1357359	histone acetylation*	transcription coactivator activity					YDR448W	YDR448W||ebi.ac.uk:Database:sgd;A_06_P2441||www.chem.agilent.com:Database:agp		A_06_P2441	1084013	OLIGO	19.685000031	1.505185184	94	9	1	950			2023	195	1	.05208092931	1	1	0	0	0	0	0	0	0	0	0	1153.928	1623.657	1	19.07345	25.89272
951						6	C	226453	226109	biological process unknown	molecular function unknown					YFR035C	YFR035C||ebi.ac.uk:Database:sgd;A_06_P2933||www.chem.agilent.com:Database:agp		A_06_P2933	1083781	OLIGO	19.896666698	1.505185184	95	9	1	951			2043	195	1	.1786667788	1	1	0	0	0	0	0	0	0	0	1	125.3867	91.98289	1	6.451426	26.10487
952					RPL12A	5	C	53218	52721	protein biosynthesis*	structural constituent of ribosome					YEL054C	YEL054C||ebi.ac.uk:Database:sgd;A_06_P2595||www.chem.agilent.com:Database:agp		A_06_P2595	1084719	OLIGO	20.108333365	1.505185184	96	9	1	952			2065	195	1	.04945704941	1	1	0	0	0	0	0	0	0	0	1	34979.17	41753.61	1	351.6618	25.82836
953						14	W	635943	636383	biological process unknown	molecular function unknown					YNR004W	YNR004W||ebi.ac.uk:Database:sgd;A_06_P6115||www.chem.agilent.com:Database:agp		A_06_P6115	1085869	OLIGO	20.320000032	1.505185184	97	9	1	953			2086	194	1	.216237744	1	1	0	0	0	0	0	0	0	0	0	53.9864	135.7631	1	6.433539	25.72015
954					ILV2	13	W	484083	486146	branched chain family amino acid biosynthesis	acetolactate synthase activity*					YMR108W	YMR108W||ebi.ac.uk:Database:sgd;A_06_P5537||www.chem.agilent.com:Database:agp		A_06_P5537	1082187	OLIGO	20.531666699	1.505185184	98	9	1	954			2107	195	1	.05262577866	1	1	0	0	0	0	0	0	0	0	1	12431.63	22476.92	1	132.2912	26.08178
955					CMP2	13	W	160180	161994	cell ion homeostasis*	calcium-dependent protein serine/threonine phosphatase activity					YML057W	YML057W||ebi.ac.uk:Database:sgd;A_06_P5344||www.chem.agilent.com:Database:agp		A_06_P5344	1083928	OLIGO	20.743333366	1.505185184	99	9	1	955			2129	194	1	.05440952827	1	1	0	0	0	0	0	0	0	0	1	806.6358	777.928	1	13.40611	25.81818
956					VMA6	12	C	1027889	1026852	vacuolar acidification*	hydrogen-transporting ATPase activity, rotational mechanism					YLR447C	YLR447C||ebi.ac.uk:Database:sgd;A_06_P5266||www.chem.agilent.com:Database:agp		A_06_P5266	1082337	OLIGO	20.955000033	1.505185184	100	9	1	956			2150	195	1	.04915762971	1	1	0	0	0	0	0	0	0	0	1	13206.96	12999.85	1	214.6574	25.50566
957					HSP32	16	W	11887	12600	biological process unknown	unfolded protein binding*					YPL280W	YPL280W||ebi.ac.uk:Database:sgd;A_06_P7041||www.chem.agilent.com:Database:agp		A_06_P7041	1085743	OLIGO	21.1666667	1.505185184	101	9	1	957			2170	195	1	.06759489351	1	1	0	0	0	0	0	0	0	0	1	442.495	363.9545	1	11.2163	25.32847
958					MCH2	11	W	6108	7529	transport	transporter activity*					YKL221W	YKL221W||ebi.ac.uk:Database:sgd;A_06_P4633||www.chem.agilent.com:Database:agp		A_06_P4633	1083254	OLIGO	21.378333367	1.505185184	102	9	1	958			2191	195	1	.2458603579	1	1	0	0	0	0	0	0	0	0	0	30.22718	162.9188	1	4.148428	25.53597
959					PCI8	9	C	229991	228657	protein deneddylation	molecular function unknown					YIL071C	YIL071C||ebi.ac.uk:Database:sgd;A_06_P3871||www.chem.agilent.com:Database:agp		A_06_P3871	1085370	OLIGO	21.590000034	1.505185184	103	9	1	959			2213	194	1	.07284616027	1	1	0	0	0	0	0	0	0	0	1	373.7086	318.5004	1	13.71292	25.65934
960					UTP20	2	W	227639	235120	35S primary transcript processing	snoRNA binding					YBL004W	YBL004W||ebi.ac.uk:Database:sgd;A_06_P1133||www.chem.agilent.com:Database:agp		A_06_P1133	1080807	OLIGO	21.801666701	1.505185184	104	9	1	960			2234	195	1	.05027210851	1	1	0	0	0	0	0	0	0	0	1	1715.572	1828.687	1	20.08082	25.5348
961					SUL1	2	W	789230	791809	sulfate transport	sulfate transporter activity					YBR294W	YBR294W||ebi.ac.uk:Database:sgd;A_06_P1548||www.chem.agilent.com:Database:agp		A_06_P1548	1084134	OLIGO	22.013333368	1.505185184	105	9	1	961			2255	194	1	.05612542517	1	1	0	0	0	0	0	0	0	0	0	10912.79	4670.685	1	158.3981	25.78445
962					SDC1	4	W	1399005	1399532	chromatin silencing at telomere*	histone lysine N-methyltransferase activity (H3-K4 specific)					YDR469W	YDR469W||ebi.ac.uk:Database:sgd;A_06_P2462||www.chem.agilent.com:Database:agp		A_06_P2462	1086877	OLIGO	22.225000035	1.505185184	106	9	1	962			2276	195	1	.1789895307	1	1	0	0	0	0	0	0	0	0	1	91.49315	125.5397	1	6.643933	25.42105
963						11	C	5621	3504	biological process unknown	molecular function unknown					YKL222C	YKL222C||ebi.ac.uk:Database:sgd;A_06_P4634||www.chem.agilent.com:Database:agp		A_06_P4634	1082341	OLIGO	22.436666702	1.505185184	107	9	1	963			2298	195	1	.06026133068	1	1	0	0	0	0	0	0	0	0	1	550.5473	512.2309	1	13.54217	24.28571
964					MTD1	11	W	590037	590999	one-carbon compound metabolism*	methylenetetrahydrofolate dehydrogenase (NAD+) activity					YKR080W	YKR080W||ebi.ac.uk:Database:sgd;A_06_P4718||www.chem.agilent.com:Database:agp		A_06_P4718	1083764	OLIGO	0	1.693333332	1	10	1	964			54	212	1	.05038744499	1	1	0	0	0	0	0	0	0	0	0	3202.281	4392.405	1	43.68648	25.74088
965						15	C	15504	15232	biological process unknown	molecular function unknown					YOL159C-A	YOL159C-A||ebi.ac.uk:Database:sgd;A_06_P6353||www.chem.agilent.com:Database:agp		A_06_P6353	1085020	OLIGO	.211666667	1.693333332	2	10	1	965			75	213	1	.2791457158	1	1	0	0	0	0	0	0	0	0	0	43.09834	100.0292	1	7.140175	27.22857
966					NHP6B	2	C	426483	426184	regulation of transcription from RNA polymerase II promoter*	chromatin binding					YBR089C-A	YBR089C-A||ebi.ac.uk:Database:sgd;A_06_P1339||www.chem.agilent.com:Database:agp		A_06_P1339	1081410	OLIGO	.423333334	1.693333332	3	10	1	966			97	212	1	.04959358714	1	1	0	0	0	0	0	0	0	0	1	3629.92	4222.811	1	45.73214	26.86447
967					AKL1	2	C	360185	356859	actin cytoskeleton organization and biogenesis*	protein kinase activity					YBR059C	YBR059C||ebi.ac.uk:Database:sgd;A_06_P1307||www.chem.agilent.com:Database:agp		A_06_P1307	1085921	OLIGO	.635000001	1.693333332	4	10	1	967			118	214	1	.05025396725	1	1	0	0	0	0	0	0	0	0	1	1738.028	1776.216	1	24.80969	26.98921
968					ATM1	13	C	869626	867554	iron ion homeostasis	ATPase activity, coupled to transmembrane movement of substances					YMR301C	YMR301C||ebi.ac.uk:Database:sgd;A_06_P5742||www.chem.agilent.com:Database:agp		A_06_P5742	1081640	OLIGO	.846666668	1.693333332	5	10	1	968			139	213	1	.05221147298	1	1	0	0	0	0	0	0	0	0	0	1236.046	1851.219	1	23.34522	26.78707
969					GIN4	4	C	1465776	1462348	protein amino acid phosphorylation*	protein kinase activity					YDR507C	YDR507C||ebi.ac.uk:Database:sgd;A_06_P2500||www.chem.agilent.com:Database:agp		A_06_P2500	1084260	OLIGO	1.058333335	1.693333332	6	10	1	969			160	214	1	.05222680137	1	1	0	0	0	0	0	0	0	0	0	1997.289	1302.795	1	31.48152	26.67045
970						12	C	797078	796698							YLR334C	YLR334C||ebi.ac.uk:Database:sgd;A_06_P5151||www.chem.agilent.com:Database:agp		A_06_P5151	1083347	OLIGO	1.270000002	1.693333332	7	10	1	970			181	212	1	.5608291502	1	1	0	0	0	0	0	0	0	0	0	27.4209	39.5271	1	3.878058	26.90909
971						15	C	441164	440391	biological process unknown	molecular function unknown					YOR060C	YOR060C||ebi.ac.uk:Database:sgd;A_06_P6422||www.chem.agilent.com:Database:agp		A_06_P6422	1081341	OLIGO	1.481666669	1.693333332	8	10	1	971			203	213	1	.1149404584	1	1	0	0	0	0	0	0	0	0	1	191.7694	165.1768	1	8.833368	26.77736
972						15	C	440259	438907	biological process unknown	molecular function unknown					YOR059C	YOR059C||ebi.ac.uk:Database:sgd;A_06_P6421||www.chem.agilent.com:Database:agp		A_06_P6421	1085886	OLIGO	1.693333336	1.693333332	9	10	1	972			224	212	1	.05051260003	1	1	0	0	0	0	0	0	0	0	1	1712.501	1556.829	1	28.04855	26.61719
973						7	C	154312	153173	metabolism	oxidoreductase activity, acting on the CH-OH group of donors, NAD or NADP as acceptor					YGL185C	YGL185C||ebi.ac.uk:Database:sgd;A_06_P3140||www.chem.agilent.com:Database:agp		A_06_P3140	1085693	OLIGO	1.905000003	1.693333332	10	10	1	973			245	213	1	.06946917399	1	1	0	0	0	0	0	0	0	0	1	338.512	426.4638	1	10.30707	26.27547
974					DSK2	13	W	818826	819947	ER-associated protein catabolism*	protein binding, bridging					YMR276W	YMR276W||ebi.ac.uk:Database:sgd;A_06_P5715||www.chem.agilent.com:Database:agp		A_06_P5715	1083648	OLIGO	2.11666667	1.693333332	11	10	1	974			266	213	1	.05046802473	1	1	0	0	0	0	0	0	0	0	0	3262.6	4539.885	1	38.46765	26.6259
975					ERG25	7	W	610568	611497	ergosterol biosynthesis	C-4 methylsterol oxidase activity					YGR060W	YGR060W||ebi.ac.uk:Database:sgd;A_06_P3280||www.chem.agilent.com:Database:agp		A_06_P3280	1085345	OLIGO	2.328333337	1.693333332	12	10	1	975			287	213	1	.05467916142	1	1	0	0	0	0	0	0	0	0	1	26153.65	12308.79	1	370.2178	26.89591
976						16	C	470471	469923							YPL044C	YPL044C||ebi.ac.uk:Database:sgd;A_06_P6803||www.chem.agilent.com:Database:agp		A_06_P6803	1084883	OLIGO	2.540000004	1.693333332	13	10	1	976			308	213	1	.3655814921	1	1	0	0	0	0	0	0	0	0	1	36.26676	69.58057	1	5.555108	26.74713
977					ERG8	13	W	712315	713670	ergosterol biosynthesis*	phosphomevalonate kinase activity					YMR220W	YMR220W||ebi.ac.uk:Database:sgd;A_06_P5659||www.chem.agilent.com:Database:agp		A_06_P5659	1083622	OLIGO	2.751666671	1.693333332	14	10	1	977			330	213	1	.05057415632	1	1	0	0	0	0	0	1	0	0	0	3343.292	4736.016	1	50.53456	27.07063
978					VAM6	4	C	320120	316971	vacuole organization and biogenesis*	Rab guanyl-nucleotide exchange factor activity					YDL077C	YDL077C||ebi.ac.uk:Database:sgd;A_06_P1806||www.chem.agilent.com:Database:agp		A_06_P1806	1081797	OLIGO	2.963333338	1.693333332	15	10	1	978			350	212	1	.0585637877	1	1	0	0	0	0	0	1	0	0	0	515.5593	750.2197	1	11.49291	26.61131
979						7	W	546445	547473	biological process unknown	molecular function unknown					YGR031W	YGR031W||ebi.ac.uk:Database:sgd;A_06_P3251||www.chem.agilent.com:Database:agp		A_06_P3251	1081890	OLIGO	3.175000005	1.693333332	16	10	1	979			372	213	1	.05266553618	1	1	0	0	0	0	0	0	0	0	1	958.4011	996.7817	1	12.48736	26.08333
980						13	W	272193	272663	biological process unknown	molecular function unknown					YMR002W	YMR002W||ebi.ac.uk:Database:sgd;A_06_P5429||www.chem.agilent.com:Database:agp		A_06_P5429	1086700	OLIGO	3.386666672	1.693333332	17	10	1	980			393	212	1	.04956453577	1	1	0	0	0	0	0	0	0	0	1	5946.358	7153.977	1	90.88744	26.1203
981					GIM3	14	C	346058	345669	tubulin folding	tubulin binding					YNL153C	YNL153C||ebi.ac.uk:Database:sgd;A_06_P5924||www.chem.agilent.com:Database:agp		A_06_P5924	1081026	OLIGO	3.598333339	1.693333332	18	10	1	981			414	213	1	.05342859945	1	1	0	0	0	0	0	0	0	0	0	1545.951	2818.8	1	21.83172	26.625
982					CLG1	7	W	87980	89338	cell cycle	cyclin-dependent protein kinase regulator activity					YGL215W	YGL215W||ebi.ac.uk:Database:sgd;A_06_P3170||www.chem.agilent.com:Database:agp		A_06_P3170	1083039	OLIGO	3.810000006	1.693333332	19	10	1	982			435	212	1	.05364830951	1	1	0	0	0	0	0	0	0	0	1	838.1043	884.8814	1	18.36209	26.61871
983						2	C	699938	698349	biological process unknown	molecular function unknown					YBR239C	YBR239C||ebi.ac.uk:Database:sgd;A_06_P1493||www.chem.agilent.com:Database:agp		A_06_P1493	1085110	OLIGO	4.021666673	1.693333332	20	10	1	983			457	214	1	.108943073	1	1	0	0	0	0	0	0	0	0	1	200.3718	180.5421	1	9.04963	27.00758
984					QRI8	13	W	318679	319176	chromatin assembly or disassembly*	ubiquitin-protein ligase activity*					YMR022W	YMR022W||ebi.ac.uk:Database:sgd;A_06_P5450||www.chem.agilent.com:Database:agp		A_06_P5450	1080886	OLIGO	4.23333334	1.693333332	21	10	1	984			477	212	1	.05041809094	1	1	0	0	0	0	0	0	0	0	1	1642.227	1630.442	1	24.88266	26.65098
985					CCT4	4	W	199997	201583	protein folding*	unfolded protein binding					YDL143W	YDL143W||ebi.ac.uk:Database:sgd;A_06_P1876||www.chem.agilent.com:Database:agp		A_06_P1876	1083005	OLIGO	4.445000007	1.693333332	22	10	1	985			498	214	1	.05009606403	1	1	0	0	0	0	0	0	0	0	1	6082.917	8183.156	1	71.79467	26.82745
986					SKG3	12	W	524867	527947	biological process unknown	molecular function unknown					YLR187W	YLR187W||ebi.ac.uk:Database:sgd;A_06_P5001||www.chem.agilent.com:Database:agp		A_06_P5001	1081353	OLIGO	4.656666674	1.693333332	23	10	1	986			520	213	1	.08335475834	1	1	0	0	0	0	0	0	0	0	1	325.8651	234.9702	1	11.29088	27.09738
987					CIN4	13	W	545154	545729	microtubule-based process	GTP binding					YMR138W	YMR138W||ebi.ac.uk:Database:sgd;A_06_P5570||www.chem.agilent.com:Database:agp		A_06_P5570	1082481	OLIGO	4.868333341	1.693333332	24	10	1	987			541	214	1	.07337932663	1	1	0	0	0	0	0	0	0	0	0	293.8673	401.9003	1	10.061	26.94118
988						4	C	720298	718811	biological process unknown	molecular function unknown					YDR132C	YDR132C||ebi.ac.uk:Database:sgd;A_06_P2120||www.chem.agilent.com:Database:agp		A_06_P2120	1084653	OLIGO	5.080000008	1.693333332	25	10	1	988			562	213	1	.07940008472	1	1	0	0	0	0	0	0	0	0	1	303.6207	289.6084	1	11.2855	27.00714
989						12	W	948365	949189	biological process unknown	molecular function unknown					YLR412W	YLR412W||ebi.ac.uk:Database:sgd;A_06_P5230||www.chem.agilent.com:Database:agp		A_06_P5230	1085006	OLIGO	5.291666675	1.693333332	26	10	1	989			583	213	1	.07058137142	1	1	0	0	0	0	0	0	0	0	1	372.1542	358.0187	1	10.08286	26.8
990					AAD16	6	C	14763	14305	aldehyde metabolism	aryl-alcohol dehydrogenase activity					YFL057C	YFL057C||ebi.ac.uk:Database:sgd;A_06_P2883||www.chem.agilent.com:Database:agp		A_06_P2883	1080780	OLIGO	5.503333342	1.693333332	27	10	1	990			605	213	1	.05244344877	1	1	0	0	0	0	0	0	0	0	0	970.5794	1180.883	1	12.4941	27.27574
991					ATG11	16	C	664670	661134	protein-vacuolar targeting*	molecular function unknown					YPR049C	YPR049C||ebi.ac.uk:Database:sgd;A_06_P7095||www.chem.agilent.com:Database:agp		A_06_P7095	1082537	OLIGO	5.715000009	1.693333332	28	10	1	991			626	214	1	.05273570763	1	1	0	0	0	0	0	0	0	0	0	923.2536	1084.834	1	18.28933	27.51449
992					PAN2	7	C	334468	331121	postreplication repair*	poly(A)-specific ribonuclease activity					YGL094C	YGL094C||ebi.ac.uk:Database:sgd;A_06_P3049||www.chem.agilent.com:Database:agp		A_06_P3049	1083948	OLIGO	5.926666676	1.693333332	29	10	1	992			647	213	1	.06078717336	1	1	0	0	0	0	0	0	0	0	0	609.6487	462.7622	1	14.24063	27.80075
993					VBA3	3	W	9706	11082	basic amino acid transport	basic amino acid permease activity					YCL069W	YCL069W||ebi.ac.uk:Database:sgd;A_06_P1619||www.chem.agilent.com:Database:agp		A_06_P1619	1081931	OLIGO	6.138333343	1.693333332	30	10	1	993			669	214	1	.5108886471	1	1	0	0	0	0	0	0	0	0	0	36.7894	35.94016	1	6.101648	27.50376
994						9	C	301255	300827	biological process unknown	molecular function unknown					YIL029C	YIL029C||ebi.ac.uk:Database:sgd;A_06_P3829||www.chem.agilent.com:Database:agp		A_06_P3829	1085355	OLIGO	6.35000001	1.693333332	31	10	1	994			689	213	1	.3167121495	1	1	0	0	0	0	0	0	0	0	1	70.09229	49.3897	1	5.547371	27.63406
995					KAR5	13	W	399701	401215	karyogamy during conjugation with cellular fusion	molecular function unknown					YMR065W	YMR065W||ebi.ac.uk:Database:sgd;A_06_P5492||www.chem.agilent.com:Database:agp		A_06_P5492	1081069	OLIGO	6.561666677	1.693333332	32	10	1	995			710	213	1	.07307172302	1	1	0	0	0	0	0	0	0	0	1	317.5566	370.3815	1	9.583237	27.62222
996						16	C	28164	26611	biological process unknown	molecular function unknown					YPL272C	YPL272C||ebi.ac.uk:Database:sgd;A_06_P7033||www.chem.agilent.com:Database:agp		A_06_P7033	1083030	OLIGO	6.773333344	1.693333332	33	10	1	996			732	212	1	.07431927585	1	1	0	0	0	0	0	0	0	0	1	328.6292	334.6791	1	11.40005	27.91698
997					ADY3	4	C	28775	26403	protein complex assembly*	protein binding					YDL239C	YDL239C||ebi.ac.uk:Database:sgd;A_06_P1974||www.chem.agilent.com:Database:agp		A_06_P1974	1085978	OLIGO	6.985000011	1.693333332	34	10	1	997			753	213	1	.05645827678	1	1	0	0	0	0	0	0	0	0	0	973.8196	615.2609	1	19.13396	27.56631
998					DIT1	4	W	1274592	1276202	spore wall assembly (sensu Fungi)	catalytic activity					YDR403W	YDR403W||ebi.ac.uk:Database:sgd;A_06_P2396||www.chem.agilent.com:Database:agp		A_06_P2396	1083567	OLIGO	7.196666678	1.693333332	35	10	1	998			773	212	1	.1159697215	1	1	0	0	0	0	0	0	0	0	1	136.3584	227.8061	1	7.949154	27.74721
999						12	C	791046	790669							YLR331C	YLR331C||ebi.ac.uk:Database:sgd;A_06_P5148||www.chem.agilent.com:Database:agp		A_06_P5148	1082561	OLIGO	7.408333345	1.693333332	36	10	1	999			795	213	1	.5079492463	1	1	0	0	0	0	0	0	0	0	0	26.68516	48.71485	1	4.414709	26.98828
1000					TUS1	12	W	982890	986813	cell wall organization and biogenesis*	Rho guanyl-nucleotide exchange factor activity					YLR425W	YLR425W||ebi.ac.uk:Database:sgd;A_06_P5243||www.chem.agilent.com:Database:agp		A_06_P5243	1083386	OLIGO	7.620000012	1.693333332	37	10	1	1000			816	213	1	.0519788732	1	1	0	0	0	0	0	0	0	0	1	1108.223	1076.089	1	15.30787	27.43223
1001						1	W	222397	222882	biological process unknown	molecular function unknown					YAR068W	YAR068W||ebi.ac.uk:Database:sgd;A_06_P1124||www.chem.agilent.com:Database:agp		A_06_P1124	1083799	OLIGO	7.831666679	1.693333332	38	10	1	1001			837	214	1	.05414987093	1	1	0	0	0	0	0	0	0	0	0	4783.599	2385.674	1	43.68853	27.65152
1002						14	W	437613	438317	biological process unknown	molecular function unknown					YNL100W	YNL100W||ebi.ac.uk:Database:sgd;A_06_P5871||www.chem.agilent.com:Database:agp		A_06_P5871	1085544	OLIGO	8.043333346	1.693333332	39	10	1	1002			859	213	1	.0505067755	1	1	0	0	0	0	0	0	0	0	0	1707.975	2091.608	1	26.444	27.49451
1003					DEG1	6	W	147126	148454	RNA processing	pseudouridylate synthase activity					YFL001W	YFL001W||ebi.ac.uk:Database:sgd;A_06_P2824||www.chem.agilent.com:Database:agp		A_06_P2824	1083155	OLIGO	8.255000013	1.693333332	40	10	1	1003			880	214	1	.05191261421	1	1	0	0	0	0	0	0	0	0	0	1595.198	2478.15	1	29.82673	27.21887
1004					AFG3	5	C	191787	189502	protein complex assembly*	ATPase activity*					YER017C	YER017C||ebi.ac.uk:Database:sgd;A_06_P2640||www.chem.agilent.com:Database:agp		A_06_P2640	1081730	OLIGO	8.46666668	1.693333332	41	10	1	1004			900	213	1	.05284172931	1	1	0	0	0	0	0	0	0	0	0	989.3714	1436.876	1	15.65193	28.01158
1005					SSK2	14	C	685433	680694	protein amino acid phosphorylation*	MAP kinase kinase kinase activity					YNR031C	YNR031C||ebi.ac.uk:Database:sgd;A_06_P6142||www.chem.agilent.com:Database:agp		A_06_P6142	1085962	OLIGO	8.678333347	1.693333332	42	10	1	1005			922	213	1	.05081515137	1	1	0	0	0	0	0	0	0	0	0	2234.18	1691.224	1	28.17068	27.33574
1006					CSL4	14	W	214922	215800	35S primary transcript processing*	3'-5'-exoribonuclease activity					YNL232W	YNL232W||ebi.ac.uk:Database:sgd;A_06_P6004||www.chem.agilent.com:Database:agp		A_06_P6004	1085348	OLIGO	8.890000014	1.693333332	43	10	1	1006			943	213	1	.0510289133	1	1	0	0	0	0	0	0	0	0	1	1323.372	1529.517	1	25.07785	27.47368
1007					TRX1	12	C	232014	231703	ER to Golgi transport*	thiol-disulfide exchange intermediate activity					YLR043C	YLR043C||ebi.ac.uk:Database:sgd;A_06_P4855||www.chem.agilent.com:Database:agp		A_06_P4855	1086800	OLIGO	9.101666681	1.693333332	44	10	1	1007			964	214	1	.05084815449	1	1	0	0	0	0	0	0	0	0	0	3651.372	2532.878	1	59.34112	27.53788
1008					RIM15	6	C	74425	69113	protein amino acid phosphorylation*	protein kinase activity					YFL033C	YFL033C||ebi.ac.uk:Database:sgd;A_06_P2859||www.chem.agilent.com:Database:agp		A_06_P2859	1082791	OLIGO	9.313333348	1.693333332	45	10	1	1008			985	213	1	.05004812278	1	1	0	0	0	0	0	0	0	0	1	1944.761	1941.037	1	29.30555	27.36364
1009					NFI1	15	C	630540	628360	protein sumoylation*	SUMO ligase activity					YOR156C	YOR156C||ebi.ac.uk:Database:sgd;A_06_P6518||www.chem.agilent.com:Database:agp		A_06_P6518	1080908	OLIGO	9.525000015	1.693333332	46	10	1	1009			1007	213	1	.08454710149	1	1	0	0	0	0	0	0	0	0	1	270.0157	267.5022	1	10.50361	27.72593
1010					FOL2	7	C	1025741	1025010	folic acid and derivative biosynthesis	GTP cyclohydrolase I activity					YGR267C	YGR267C||ebi.ac.uk:Database:sgd;A_06_P3488||www.chem.agilent.com:Database:agp		A_06_P3488	1082624	OLIGO	9.736666682	1.693333332	47	10	1	1010			1028	213	1	.05029255526	1	1	0	0	0	0	0	0	0	0	1	5948.399	8255.916	1	102.2244	27.36567
1011					FIG4	14	C	31377	28738	cellular morphogenesis during conjugation with cellular fusion	polyphosphoinositide phosphatase activity					YNL325C	YNL325C||ebi.ac.uk:Database:sgd;A_06_P6097||www.chem.agilent.com:Database:agp		A_06_P6097	1082661	OLIGO	9.948333349	1.693333332	48	10	1	1011			1049	213	1	.05223076856	1	1	0	0	0	0	0	0	0	0	0	1018.153	1279.159	1	18.7062	27.48519
1012					PRM6	13	C	181075	180017	conjugation with cellular fusion	molecular function unknown					YML047C	YML047C||ebi.ac.uk:Database:sgd;A_06_P5333||www.chem.agilent.com:Database:agp		A_06_P5333	1083880	OLIGO	10.160000016	1.693333332	49	10	1	1012			1070	212	1	.4339107634	1	1	0	0	0	0	0	0	0	0	0	26.71629	64.8034	1	4.605644	27.27799
1013						14	C	743538	742879	biological process unknown	molecular function unknown					YNR061C	YNR061C||ebi.ac.uk:Database:sgd;A_06_P6174||www.chem.agilent.com:Database:agp		A_06_P6174	1084257	OLIGO	10.371666683	1.693333332	50	10	1	1013			1091	213	1	.06291649468	1	1	0	0	0	0	0	0	0	0	0	604.8406	404.0591	1	16.02697	27.04183
1014					RCK2	12	W	634254	636086	protein amino acid phosphorylation*	protein serine/threonine kinase activity					YLR248W	YLR248W||ebi.ac.uk:Database:sgd;A_06_P5062||www.chem.agilent.com:Database:agp		A_06_P5062	1082296	OLIGO	10.58333335	1.693333332	51	10	1	1014			1112	213	1	.05126505524	1	1	0	0	0	0	0	0	0	0	0	4127.448	2693.509	1	52.15642	27.04348
1015						11	C	136028	135795							YKL165C-A	YKL165C-A||ebi.ac.uk:Database:sgd;A_06_P4578||www.chem.agilent.com:Database:agp		A_06_P4578	1081418	OLIGO	10.795000017	1.693333332	52	10	1	1015			1133	213	1	.5264038291	1	1	0	0	0	0	0	0	0	0	0	26.54306	45.80151	1	4.495313	26.97368
1016						13	C	565908	565573							YMR153C-A	YMR153C-A||ebi.ac.uk:Database:sgd;A_06_P5585||www.chem.agilent.com:Database:agp		A_06_P5585	1081153	OLIGO	11.006666684	1.693333332	53	10	1	1016			1155	213	1	.2069067056	1	1	0	0	0	0	0	0	0	0	1	89.47312	94.58608	1	7.668225	26.93796
1017					PMT5	4	W	289909	292140	protein amino acid O-linked glycosylation	dolichyl-phosphate-mannose-protein mannosyltransferase activity					YDL093W	YDL093W||ebi.ac.uk:Database:sgd;A_06_P1823||www.chem.agilent.com:Database:agp		A_06_P1823	1081734	OLIGO	11.218333351	1.693333332	54	10	1	1017			1176	213	1	.05594272984	1	1	0	0	0	0	0	0	0	0	0	975.6345	641.5867	1	19.48403	27.50769
1018						17	W	4254	4415							Q0017	Q0017||ebi.ac.uk:Database:sgd;A_06_P1002||www.chem.agilent.com:Database:agp		A_06_P1002	1083850	OLIGO	11.430000018	1.693333332	55	10	1	1018			1197	213	1	.05873229579	1	1	0	0	0	0	0	0	0	0	1	596.5418	556.105	1	11.33075	27.49638
1019						10	W	627254	628240	biological process unknown	lipase activity					YJR107W	YJR107W||ebi.ac.uk:Database:sgd;A_06_P4350||www.chem.agilent.com:Database:agp		A_06_P4350	1080625	OLIGO	11.641666685	1.693333332	56	10	1	1019			1219	214	1	.05332122226	1	1	0	0	0	0	0	0	0	0	0	1143.239	858.206	1	20.13792	26.81061
1020					MRC1	3	C	22106	18816	chromatin silencing at telomere*	molecular function unknown					YCL061C	YCL061C||ebi.ac.uk:Database:sgd;A_06_P1612||www.chem.agilent.com:Database:agp		A_06_P1612	1081029	OLIGO	11.853333352	1.693333332	57	10	1	1020			1240	213	1	.06613564602	1	1	0	0	0	0	0	0	0	0	0	497.4275	365.7797	1	12.88985	26.77818
1021					HIF1	12	C	100200	99043	chromatin silencing at telomere	molecular function unknown					YLL022C	YLL022C||ebi.ac.uk:Database:sgd;A_06_P4767||www.chem.agilent.com:Database:agp		A_06_P4767	1086559	OLIGO	12.065000019	1.693333332	58	10	1	1021			1261	214	1	.0502690925	1	1	0	0	0	0	0	0	0	0	1	1760.192	1991.446	1	26.85299	26.91336
1022						15	W	903038	903367							YOR314W	YOR314W||ebi.ac.uk:Database:sgd;A_06_P6677||www.chem.agilent.com:Database:agp		A_06_P6677	1086223	OLIGO	12.276666686	1.693333332	59	10	1	1022			1283	213	1	.4259048278	1	1	0	0	0	0	0	0	0	0	1	39.7157	47.96969	1	6.326344	26.79853
1023						3	C	50627	50133							YCL041C	YCL041C||ebi.ac.uk:Database:sgd;A_06_P1593||www.chem.agilent.com:Database:agp		A_06_P1593	1082285	OLIGO	12.488333353	1.693333332	60	10	1	1023			1303	213	1	.2906662293	1	1	0	0	0	0	0	0	0	0	0	34.62928	109.6392	1	6.258814	27.13755
1024					VPS24	11	W	359787	360461	late endosome to vacuole transport*	molecular function unknown					YKL041W	YKL041W||ebi.ac.uk:Database:sgd;A_06_P4450||www.chem.agilent.com:Database:agp		A_06_P4450	1081335	OLIGO	12.70000002	1.693333332	61	10	1	1024			1324	213	1	.05635468882	1	1	0	0	0	0	0	0	0	0	1	734.3907	629.7729	1	13.05547	26.77528
1025						12	C	395521	394766	biological process unknown	molecular function unknown					YLR126C	YLR126C||ebi.ac.uk:Database:sgd;A_06_P4939||www.chem.agilent.com:Database:agp		A_06_P4939	1080875	OLIGO	12.911666687	1.693333332	62	10	1	1025			1345	213	1	.05429972105	1	1	0	0	0	0	0	0	0	0	0	1867.291	1026.746	1	24.35879	26.86667
1026						6	W	51350	52972	biological process unknown	molecular function unknown					YFL040W	YFL040W||ebi.ac.uk:Database:sgd;A_06_P2867||www.chem.agilent.com:Database:agp		A_06_P2867	1086165	OLIGO	13.123333354	1.693333332	63	10	1	1026			1366	212	1	.520928774	1	1	0	0	0	0	0	0	0	0	0	29.48604	42.65219	1	4.559721	26.83704
1027					UME6	4	C	867517	865007	sporulation (sensu Fungi)*	DNA binding*					YDR207C	YDR207C||ebi.ac.uk:Database:sgd;A_06_P2196||www.chem.agilent.com:Database:agp		A_06_P2196	1086657	OLIGO	13.335000021	1.693333332	64	10	1	1027			1387	213	1	.1467685802	1	1	0	0	0	0	0	0	0	0	1	120.7308	147.8872	1	8.159794	26.64015
1028						4	C	894496	894113							YDR215C	YDR215C||ebi.ac.uk:Database:sgd;A_06_P2204||www.chem.agilent.com:Database:agp		A_06_P2204	1086442	OLIGO	13.546666688	1.693333332	65	10	1	1028			1409	213	1	.5254657871	1	1	0	0	0	0	0	0	0	0	0	29.47913	41.96058	1	3.830968	26.72624
1029					FLR1	2	C	254210	252564	response to toxin	multidrug transporter activity					YBR008C	YBR008C||ebi.ac.uk:Database:sgd;A_06_P1255||www.chem.agilent.com:Database:agp		A_06_P1255	1085589	OLIGO	13.758333355	1.693333332	66	10	1	1029			1430	214	1	.05465021309	1	1	0	0	0	0	0	0	0	0	0	1084.741	737.3151	1	24.95064	26.85556
1030					ALA1	15	C	949104	946228	alanyl-tRNA aminoacylation	alanine-tRNA ligase activity					YOR335C	YOR335C||ebi.ac.uk:Database:sgd;A_06_P6699||www.chem.agilent.com:Database:agp		A_06_P6699	1084771	OLIGO	13.970000022	1.693333332	67	10	1	1030			1451	213	1	.04986904492	1	1	0	0	0	0	0	0	0	0	1	7910.08	6127.005	1	82.88749	26.37175
1031					XBP1	9	C	177247	175304	response to stress	transcription factor activity					YIL101C	YIL101C||ebi.ac.uk:Database:sgd;A_06_P3900||www.chem.agilent.com:Database:agp		A_06_P3900	1081287	OLIGO	14.181666689	1.693333332	68	10	1	1031			1473	214	1	.06659800912	1	1	0	0	0	0	0	0	0	0	1	415.8091	406.9558	1	11.7438	26.78182
1032					PGU1	10	W	722730	723815	pseudohyphal growth*	polygalacturonase activity					YJR153W	YJR153W||ebi.ac.uk:Database:sgd;A_06_P4397||www.chem.agilent.com:Database:agp		A_06_P4397	1086521	OLIGO	14.393333356	1.693333332	69	10	1	1032			1493	213	1	.5063642725	1	1	0	0	0	0	0	0	0	0	1	39.27996	34.22114	1	7.100329	26.94253
1033						13	W	655075	658341	biological process unknown	molecular function unknown					YMR196W	YMR196W||ebi.ac.uk:Database:sgd;A_06_P5635||www.chem.agilent.com:Database:agp		A_06_P5635	1083754	OLIGO	14.605000023	1.693333332	70	10	1	1033			1515	214	1	.0530033396	1	1	0	0	0	0	0	0	0	0	0	7651.278	4127.497	1	97.37827	26.45896
1034						8	W	17390	17839							YHL041W	YHL041W||ebi.ac.uk:Database:sgd;A_06_P3559||www.chem.agilent.com:Database:agp		A_06_P3559	1081889	OLIGO	14.81666669	1.693333332	71	10	1	1034			1536	213	1	.5176518131	1	1	0	0	0	0	0	0	0	0	1	34.19461	37.62871	1	5.218876	26.1124
1035					YRF1-1	4	W	1526304	1531694	telomerase-independent telomere maintenance	DNA helicase activity					YDR545W	YDR545W||ebi.ac.uk:Database:sgd;A_06_P2539||www.chem.agilent.com:Database:agp		A_06_P2539	1081111	OLIGO	15.028333357	1.693333332	72	10	1	1035			1557	214	1	.049766016	1	1	0	0	0	0	0	0	0	0	1	23929.83	30668.58	1	310.6769	26.91011
1036					MIF2	11	W	273039	274688	chromosome segregation*	centromeric DNA binding					YKL089W	YKL089W||ebi.ac.uk:Database:sgd;A_06_P4499||www.chem.agilent.com:Database:agp		A_06_P4499	1086392	OLIGO	15.240000024	1.693333332	73	10	1	1036			1578	212	1	.06228102965	1	1	0	0	0	0	0	0	0	0	0	578.5148	427.3923	1	12.8048	26.32482
1037					IME2	10	W	221307	223244	protein amino acid phosphorylation*	protein kinase activity					YJL106W	YJL106W||ebi.ac.uk:Database:sgd;A_06_P4128||www.chem.agilent.com:Database:agp		A_06_P4128	1085227	OLIGO	15.451666691	1.693333332	74	10	1	1037			1599	213	1	.3223366784	1	1	0	0	0	0	0	0	0	0	1	51.78306	64.82368	1	5.80953	26.31273
1038					POP5	1	W	82707	83228	rRNA processing*	ribonuclease P activity*					YAL033W	YAL033W||ebi.ac.uk:Database:sgd;A_06_P1055||www.chem.agilent.com:Database:agp		A_06_P1055	1086781	OLIGO	15.663333358	1.693333332	75	10	1	1038			1620	213	1	.05216389301	1	1	0	0	0	0	0	0	0	0	1	1046.663	1065.79	1	17.05987	26.37591
1039						16	W	790079	791116	biological process unknown	molecular function unknown					YPR127W	YPR127W||ebi.ac.uk:Database:sgd;A_06_P7174||www.chem.agilent.com:Database:agp		A_06_P7174	1085686	OLIGO	15.875000025	1.693333332	76	10	1	1039			1642	214	1	.05100608461	1	1	0	0	0	0	0	0	0	0	0	2319.084	3386.298	1	32.27645	26.14662
1040					PRE4	6	C	249853	249053	ubiquitin-dependent protein catabolism	endopeptidase activity					YFR050C	YFR050C||ebi.ac.uk:Database:sgd;A_06_P2948||www.chem.agilent.com:Database:agp		A_06_P2948	1082511	OLIGO	16.086666692	1.693333332	77	10	1	1040			1663	213	1	.05001973812	1	1	0	0	0	0	0	0	0	0	1	3781.372	4917.367	1	54.15061	26.73455
1041					SRD1	3	C	148900	148235	rRNA processing	molecular function unknown					YCR018C	YCR018C||ebi.ac.uk:Database:sgd;A_06_P1639||www.chem.agilent.com:Database:agp		A_06_P1639	1080896	OLIGO	16.298333359	1.693333332	78	10	1	1041			1684	213	1	.4331789067	1	1	0	0	0	0	0	0	0	0	0	35.04949	52.03222	1	5.843534	26.57143
1042					HYR1	9	W	423125	423616	response to oxidative stress	thiol peroxidase activity*					YIR037W	YIR037W||ebi.ac.uk:Database:sgd;A_06_P4014||www.chem.agilent.com:Database:agp		A_06_P4014	1081583	OLIGO	16.510000026	1.693333332	79	10	1	1042			1705	213	1	.05004952703	1	1	0	0	0	0	0	0	0	0	1	4007.848	3117.645	1	64.67126	26.53933
1043					CCZ1	2	W	497157	499271	protein-vacuolar targeting*	guanyl-nucleotide exchange factor activity					YBR131W	YBR131W||ebi.ac.uk:Database:sgd;A_06_P1383||www.chem.agilent.com:Database:agp		A_06_P1383	1080708	OLIGO	16.721666693	1.693333332	80	10	1	1043			1726	214	1	.05202299032	1	1	0	0	0	0	0	0	0	0	0	1066.38	1348.61	1	20.3052	26.57143
1044					SHU2	4	C	602865	602194	error-free DNA repair	molecular function unknown					YDR078C	YDR078C||ebi.ac.uk:Database:sgd;A_06_P2065||www.chem.agilent.com:Database:agp		A_06_P2065	1084922	OLIGO	16.93333336	1.693333332	81	10	1	1044			1747	213	1	.1146497349	1	1	0	0	0	0	0	0	0	0	1	190.8196	167.0257	1	7.782252	26.47232
1045					RPL20A	13	C	754196	753224	protein biosynthesis	structural constituent of ribosome					YMR242C	YMR242C||ebi.ac.uk:Database:sgd;A_06_P5681||www.chem.agilent.com:Database:agp		A_06_P5681	1083119	OLIGO	17.145000027	1.693333332	82	10	1	1045			1768	214	1	.0497271162	1	1	0	0	0	0	0	0	0	0	1	16499.08	13005.75	1	176.2233	26.21033
1046					HEM3	4	C	93746	92763	heme biosynthesis	hydroxymethylbilane synthase activity					YDL205C	YDL205C||ebi.ac.uk:Database:sgd;A_06_P1940||www.chem.agilent.com:Database:agp		A_06_P1940	1083908	OLIGO	17.356666694	1.693333332	83	10	1	1046			1789	213	1	.0502705418	1	1	0	0	0	0	0	0	0	0	0	1992.35	2450.498	1	24.72109	26.40569
1047						15	W	493265	494470	biological process unknown	molecular function unknown					YOR091W	YOR091W||ebi.ac.uk:Database:sgd;A_06_P6453||www.chem.agilent.com:Database:agp		A_06_P6453	1083875	OLIGO	17.568333361	1.693333332	84	10	1	1047			1811	214	1	.05047742534	1	1	0	0	0	0	0	0	0	0	1	1678.696	1572.748	1	25.56183	26.13619
1048					MPH3	10	C	739731	737923	carbohydrate transport	carbohydrate transporter activity*					YJR160C	YJR160C||ebi.ac.uk:Database:sgd;A_06_P4404||www.chem.agilent.com:Database:agp		A_06_P4404	1086751	OLIGO	17.780000028	1.693333332	85	10	1	1048			1832	213	1	.2915706739	1	1	0	0	0	0	0	0	0	0	1	60.12325	68.76424	1	6.758285	26.23372
1049					TPO2	7	C	765611	763767	polyamine transport	spermine transporter activity					YGR138C	YGR138C||ebi.ac.uk:Database:sgd;A_06_P3359||www.chem.agilent.com:Database:agp		A_06_P3359	1086653	OLIGO	17.991666695	1.693333332	86	10	1	1049			1853	214	1	.05434387676	1	1	0	0	0	0	0	0	0	0	0	3698.59	7615.531	1	49.49077	26.67803
1050					LOC1	6	W	149105	149719	ribosomal large subunit biogenesis*	mRNA binding					YFR001W	YFR001W||ebi.ac.uk:Database:sgd;A_06_P2895||www.chem.agilent.com:Database:agp		A_06_P2895	1082486	OLIGO	18.203333362	1.693333332	87	10	1	1050			1874	213	1	.05020532927	1	1	0	0	0	0	0	0	0	0	1	1784.453	1955.417	1	33.69849	26.02545
1051						16	C	560763	560566							YPR002C-A	YPR002C-A||ebi.ac.uk:Database:sgd;A_06_P7046||www.chem.agilent.com:Database:agp		A_06_P7046	1084166	OLIGO	18.415000029	1.693333332	88	10	1	1051			1895	214	1	.05732144166	1	1	0	0	0	0	0	0	0	0	1	612.2836	642.363	1	12.28084	25.4927
1052					RIM4	8	W	56646	58787	meiosis*	RNA binding					YHL024W	YHL024W||ebi.ac.uk:Database:sgd;A_06_P3542||www.chem.agilent.com:Database:agp		A_06_P3542	1084076	OLIGO	18.626666696	1.693333332	89	10	1	1052			1917	213	1	.1323643996	1	1	0	0	0	0	0	0	0	0	0	79.68969	279.2487	1	7.149546	25.57509
1053						14	C	755033	753723	biological process unknown	molecular function unknown					YNR066C	YNR066C||ebi.ac.uk:Database:sgd;A_06_P6179||www.chem.agilent.com:Database:agp		A_06_P6179	1085230	OLIGO	18.838333363	1.693333332	90	10	1	1053			1938	214	1	.3847584085	1	1	0	0	0	0	0	0	0	0	1	42.05051	55.51036	1	5.934946	25.95423
1054						7	W	358639	359031	biological process unknown	molecular function unknown					YGL080W	YGL080W||ebi.ac.uk:Database:sgd;A_06_P3035||www.chem.agilent.com:Database:agp		A_06_P3035	1083295	OLIGO	19.05000003	1.693333332	91	10	1	1054			1959	213	1	.2368719346	1	1	0	0	0	0	0	0	0	0	1	66.77465	94.62328	1	6.904132	25.65108
1055					TFB3	4	W	1383801	1384766	transcription initiation from RNA polymerase II promoter*	general RNA polymerase II transcription factor activity					YDR460W	YDR460W||ebi.ac.uk:Database:sgd;A_06_P2453||www.chem.agilent.com:Database:agp		A_06_P2453	1084112	OLIGO	19.261666697	1.693333332	92	10	1	1055			1980	214	1	.05098590879	1	1	0	0	0	0	0	0	0	0	0	1800.426	1430.711	1	35.83818	25.25094
1056					UBP9	5	W	355462	357726	protein deubiquitination	ubiquitin-specific protease activity					YER098W	YER098W||ebi.ac.uk:Database:sgd;A_06_P2731||www.chem.agilent.com:Database:agp		A_06_P2731	1086830	OLIGO	19.473333364	1.693333332	93	10	1	1056			2001	213	1	.06851056117	1	1	0	0	0	0	0	0	0	0	0	340.6537	453.83	1	13.30555	25.71326
1057						8	C	400850	399270	biological process unknown	molecular function unknown					YHR151C	YHR151C||ebi.ac.uk:Database:sgd;A_06_P3729||www.chem.agilent.com:Database:agp		A_06_P3729	1085950	OLIGO	19.685000031	1.693333332	94	10	1	1057			2023	215	1	.06464307781	1	1	0	0	0	0	0	0	0	0	1	483.7893	406.5586	1	11.95531	25.47101
1058					CCH1	7	W	924699	930818	calcium ion transport	calcium channel activity					YGR217W	YGR217W||ebi.ac.uk:Database:sgd;A_06_P3438||www.chem.agilent.com:Database:agp		A_06_P3438	1081566	OLIGO	19.896666698	1.693333332	95	10	1	1058			2044	213	1	.0511707304	1	1	0	0	0	0	0	0	0	0	1	1400.131	1261.933	1	22.55287	26.1597
1059					APL1	10	W	445837	447939	vesicle-mediated transport	molecular function unknown					YJR005W	YJR005W||ebi.ac.uk:Database:sgd;A_06_P4251||www.chem.agilent.com:Database:agp		A_06_P4251	1082207	OLIGO	20.108333365	1.693333332	96	10	1	1059			2065	214	1	.05328052013	1	1	0	0	0	0	0	0	0	0	1	877.5401	923.1281	1	17.1604	25.98901
1060					CUE5	15	W	408424	409659	biological process unknown	molecular function unknown					YOR042W	YOR042W||ebi.ac.uk:Database:sgd;A_06_P6404||www.chem.agilent.com:Database:agp		A_06_P6404	1082091	OLIGO	20.320000032	1.693333332	97	10	1	1060			2086	213	1	.04970811331	1	1	0	0	0	0	0	0	0	0	1	2440.215	2525.831	1	44.36725	26.08333
1061					SSH4	11	W	210239	211978	biological process unknown	molecular function unknown					YKL124W	YKL124W||ebi.ac.uk:Database:sgd;A_06_P4536||www.chem.agilent.com:Database:agp		A_06_P4536	1082918	OLIGO	20.531666699	1.693333332	98	10	1	1061			2107	214	1	.08057836516	1	1	0	0	0	0	0	0	0	0	1	256.9398	329.6488	1	10.36472	26.24088
1062						8	C	266839	262802	biological process unknown	molecular function unknown					YHR080C	YHR080C||ebi.ac.uk:Database:sgd;A_06_P3655||www.chem.agilent.com:Database:agp		A_06_P3655	1082833	OLIGO	20.743333366	1.693333332	99	10	1	1062			2128	213	1	.04976653354	1	1	0	0	0	0	0	0	0	0	1	2406.306	2321.845	1	38.1402	25.86415
1063					CBK1	14	W	332597	334867	regulation of exit from mitosis*	protein kinase activity					YNL161W	YNL161W||ebi.ac.uk:Database:sgd;A_06_P5932||www.chem.agilent.com:Database:agp		A_06_P5932	1082451	OLIGO	20.955000033	1.693333332	100	10	1	1063			2150	214	1	.05192011742	1	1	0	0	0	0	0	0	0	0	0	1253.808	1799.682	1	20.31294	25.82117
1064					RPS25A	7	C	534462	534136	protein biosynthesis	structural constituent of ribosome					YGR027C	YGR027C||ebi.ac.uk:Database:sgd;A_06_P3247||www.chem.agilent.com:Database:agp		A_06_P3247	1083330	OLIGO	21.1666667	1.693333332	101	10	1	1064			2170	213	1	.04918151664	1	1	0	0	0	0	0	0	0	0	1	35545.38	33295.02	1	368.6052	25.83643
1065					ATG15	3	W	237209	238771	autophagy*	lipase activity					YCR068W	YCR068W||ebi.ac.uk:Database:sgd;A_06_P1690||www.chem.agilent.com:Database:agp		A_06_P1690	1086614	OLIGO	21.378333367	1.693333332	102	10	1	1065			2191	214	1	.252587914	1	1	0	0	0	0	0	0	0	0	1	70.51709	78.92286	1	7.051471	25.68148
1066					MRPL9	7	C	936886	936077	protein biosynthesis*	structural constituent of ribosome*					YGR220C	YGR220C||ebi.ac.uk:Database:sgd;A_06_P3441||www.chem.agilent.com:Database:agp		A_06_P3441	1086184	OLIGO	21.590000034	1.693333332	103	10	1	1066			2213	213	1	.05099533609	1	1	0	0	0	0	0	0	0	0	0	1891.974	2669.043	1	31.52096	26.22677
1067						1	W	218540	219136	biological process unknown	molecular function unknown					YAR062W	YAR062W||ebi.ac.uk:Database:sgd;A_06_P1121||www.chem.agilent.com:Database:agp		A_06_P1121	1083927	OLIGO	21.801666701	1.693333332	104	10	1	1067			2234	214	1	.4671647385	1	1	0	0	0	0	0	0	0	0	1	49.89984	31.20438	1	5.94962	25.95018
1068					BUD5	3	C	199544	197616	pseudohyphal growth*	signal transducer activity*					YCR038C	YCR038C||ebi.ac.uk:Database:sgd;A_06_P1663||www.chem.agilent.com:Database:agp		A_06_P1663	1082619	OLIGO	22.013333368	1.693333332	105	10	1	1068			2255	214	1	.1068943015	1	1	0	0	0	0	0	0	0	0	1	200.6817	189.0798	1	10.59643	25.97091
1069						16	C	15355	15053	biological process unknown	molecular function unknown					YPL278C	YPL278C||ebi.ac.uk:Database:sgd;A_06_P7039||www.chem.agilent.com:Database:agp		A_06_P7039	1085980	OLIGO	22.225000035	1.693333332	106	10	1	1069			2276	214	1	.06647597808	1	1	0	0	0	0	0	0	0	0	0	1601.969	458.8145	1	26.95056	25.78495
1070						5	C	342607	342386							YER091C-A	YER091C-A||ebi.ac.uk:Database:sgd;A_06_P2723||www.chem.agilent.com:Database:agp		A_06_P2723	1082437	OLIGO	22.436666702	1.693333332	107	10	1	1070			2297	213	1	.6157428426	1	1	0	0	0	0	0	0	0	0	0	27.21843	33.23932	1	5.902515	24.55939
1071					PHO81	7	C	958212	954676	phosphate metabolism	cyclin-dependent protein kinase inhibitor activity					YGR233C	YGR233C||ebi.ac.uk:Database:sgd;A_06_P3454||www.chem.agilent.com:Database:agp		A_06_P3454	1081216	OLIGO	0	1.88148148	1	11	1	1071			54	231	1	.04981841084	1	1	0	0	0	0	0	0	0	0	1	5402.881	4295.249	1	77.8687	25.37818
1072					RSM19	14	C	695327	695052	protein biosynthesis	structural constituent of ribosome					YNR037C	YNR037C||ebi.ac.uk:Database:sgd;A_06_P6150||www.chem.agilent.com:Database:agp		A_06_P6150	1085157	OLIGO	.211666667	1.88148148	2	11	1	1072			75	232	1	.06171777871	1	1	0	0	0	0	0	0	0	0	0	433.954	929.5347	1	11.52441	26.5348
1073					RIB2	15	C	204470	202695	riboflavin biosynthesis	pseudouridylate synthase activity*					YOL066C	YOL066C||ebi.ac.uk:Database:sgd;A_06_P6258||www.chem.agilent.com:Database:agp		A_06_P6258	1081766	OLIGO	.423333334	1.88148148	3	11	1	1073			96	231	1	.0558794619	1	1	0	0	0	0	0	0	0	0	1	738.5081	663.8002	1	12.4037	26.89247
1074					MRPL25	7	C	637581	637108	protein biosynthesis	structural constituent of ribosome					YGR076C	YGR076C||ebi.ac.uk:Database:sgd;A_06_P3296||www.chem.agilent.com:Database:agp		A_06_P3296	1082006	OLIGO	.635000001	1.88148148	4	11	1	1074			118	232	1	.1509001352	1	1	0	0	0	0	0	0	0	0	1	96.97832	171.3543	1	7.15726	26.41219
1075					TAT1	2	C	378430	376571	amino acid transport	amino acid transporter activity					YBR069C	YBR069C||ebi.ac.uk:Database:sgd;A_06_P1317||www.chem.agilent.com:Database:agp		A_06_P1317	1082093	OLIGO	.846666668	1.88148148	5	11	1	1075			139	231	1	.4413925057	1	1	0	0	0	0	0	0	0	0	1	39.1745	45.28838	1	6.329283	26.43956
1076						2	C	167841	167521	biological process unknown	molecular function unknown					YBL028C	YBL028C||ebi.ac.uk:Database:sgd;A_06_P1157||www.chem.agilent.com:Database:agp		A_06_P1157	1084128	OLIGO	1.058333335	1.88148148	6	11	1	1076			160	232	1	.1003753452	1	1	0	0	0	0	0	0	0	0	0	143.7641	321.7997	1	7.851744	26.94186
1077					IES5	5	W	342851	343228	biological process unknown	molecular function unknown					YER092W	YER092W||ebi.ac.uk:Database:sgd;A_06_P2724||www.chem.agilent.com:Database:agp		A_06_P2724	1081989	OLIGO	1.270000002	1.88148148	7	11	1	1077			181	231	1	.05315542451	1	1	0	0	0	0	0	0	0	0	0	2152.957	3951.498	1	32.4076	26.54577
1078					FYV5	3	C	23981	23523							YCL058C	YCL058C||ebi.ac.uk:Database:sgd;A_06_P1610||www.chem.agilent.com:Database:agp		A_06_P1610	1080974	OLIGO	1.481666669	1.88148148	8	11	1	1078			203	232	1	.5620436745	1	1	0	0	0	0	0	0	0	0	1	36.74762	29.57048	1	4.279954	26.5
1079					FRE4	14	W	739949	742108	iron-siderophore transport	ferric-chelate reductase activity					YNR060W	YNR060W||ebi.ac.uk:Database:sgd;A_06_P6173||www.chem.agilent.com:Database:agp		A_06_P6173	1082279	OLIGO	1.693333336	1.88148148	9	11	1	1079			224	231	1	.5253103322	1	1	0	0	0	0	0	0	0	0	0	34.19707	36.54111	1	5.243037	26.80669
1080					PIC2	5	C	259638	258736	phosphate transport	inorganic phosphate transporter activity					YER053C	YER053C||ebi.ac.uk:Database:sgd;A_06_P2680||www.chem.agilent.com:Database:agp		A_06_P2680	1085421	OLIGO	1.905000003	1.88148148	10	11	1	1080			245	233	1	.05237436182	1	1	0	0	0	0	0	0	0	0	0	1242.32	1911.329	1	24.36028	26.67958
1081					CRF1	4	W	912093	913496	negative regulation of transcription	transcriptional repressor activity					YDR223W	YDR223W||ebi.ac.uk:Database:sgd;A_06_P2212||www.chem.agilent.com:Database:agp		A_06_P2212	1080670	OLIGO	2.11666667	1.88148148	11	11	1	1081			266	232	1	.3101429001	1	1	0	0	0	0	0	0	0	0	1	63.84319	57.06131	1	5.322484	26.74823
1082					RPC25	11	C	176486	175848	transcription from RNA polymerase III promoter	DNA-directed RNA polymerase activity					YKL144C	YKL144C||ebi.ac.uk:Database:sgd;A_06_P4556||www.chem.agilent.com:Database:agp		A_06_P4556	1085675	OLIGO	2.328333337	1.88148148	12	11	1	1082			287	232	1	.05463406215	1	1	0	0	0	0	0	0	0	0	0	725.6445	999.3358	1	13.28803	26.85348
1083						4	W	1145084	1146028	biological process unknown	molecular function unknown					YDR336W	YDR336W||ebi.ac.uk:Database:sgd;A_06_P2327||www.chem.agilent.com:Database:agp		A_06_P2327	1083599	OLIGO	2.540000004	1.88148148	13	11	1	1083			308	231	1	.06450149506	1	1	0	0	0	0	0	0	0	0	1	431.1619	454.7894	1	12.36533	26.88679
1084					CBF2	7	W	767434	770304	chromosome segregation	DNA bending activity*					YGR140W	YGR140W||ebi.ac.uk:Database:sgd;A_06_P3361||www.chem.agilent.com:Database:agp		A_06_P3361	1083221	OLIGO	2.751666671	1.88148148	14	11	1	1084			329	232	1	.055265199	1	1	0	0	0	0	0	1	0	0	1	692.0764	794.5515	1	15.56214	26.62816
1085					SNF1	4	W	1412363	1414264	protein amino acid phosphorylation*	AMP-activated protein kinase activity					YDR477W	YDR477W||ebi.ac.uk:Database:sgd;A_06_P2470||www.chem.agilent.com:Database:agp		A_06_P2470	1085173	OLIGO	2.963333338	1.88148148	15	11	1	1085			351	232	1	.05010567584	1	1	0	0	0	0	0	1	0	0	1	1861.601	1957.124	1	29.57349	26.70652
1086						12	W	840320	840913	biological process unknown	molecular function unknown					YLR356W	YLR356W||ebi.ac.uk:Database:sgd;A_06_P5173||www.chem.agilent.com:Database:agp		A_06_P5173	1083800	OLIGO	3.175000005	1.88148148	16	11	1	1086			372	232	1	.06565451142	1	1	0	0	0	0	0	0	0	0	0	638.0486	343.776	1	13.19484	26.37218
1087					YGK3	15	C	79478	78351	protein amino acid phosphorylation*	glycogen synthase kinase 3 activity					YOL128C	YOL128C||ebi.ac.uk:Database:sgd;A_06_P6321||www.chem.agilent.com:Database:agp		A_06_P6321	1081497	OLIGO	3.386666672	1.88148148	17	11	1	1087			393	231	1	.0677956644	1	1	0	0	0	0	0	0	0	0	1	388.0374	404.0871	1	12.0681	26.54152
1088					DSL1	14	C	160372	158108	retrograde transport, Golgi to ER	molecular function unknown					YNL258C	YNL258C||ebi.ac.uk:Database:sgd;A_06_P6030||www.chem.agilent.com:Database:agp		A_06_P6030	1085802	OLIGO	3.598333339	1.88148148	18	11	1	1088			414	232	1	.05047886442	1	1	0	0	0	0	0	0	0	0	1	1693.235	1572.384	1	29.42666	26.72761
1089					MBB1	10	C	60181	59855							YJL199C	YJL199C||ebi.ac.uk:Database:sgd;A_06_P4221||www.chem.agilent.com:Database:agp		A_06_P4221	1082379	OLIGO	3.810000006	1.88148148	19	11	1	1089			436	231	1	.08464747167	1	1	0	0	0	0	0	0	0	0	1	265.9628	270.6153	1	8.246322	27.01481
1090					HXT12	9	W	19847	21220	biological process unknown*	molecular function unknown*					YIL170W	YIL170W||ebi.ac.uk:Database:sgd;A_06_P3969||www.chem.agilent.com:Database:agp		A_06_P3969	1082688	OLIGO	4.021666673	1.88148148	20	11	1	1090			457	232	1	.2589271075	1	1	0	0	0	0	0	0	0	0	1	84.64216	62.10202	1	7.568664	27.12048
1091					URA6	11	C	392783	392169	'de novo' pyrimidine base biosynthesis*	uridine kinase activity					YKL024C	YKL024C||ebi.ac.uk:Database:sgd;A_06_P4432||www.chem.agilent.com:Database:agp		A_06_P4432	1084814	OLIGO	4.23333334	1.88148148	21	11	1	1091			477	231	1	.05012312354	1	1	0	0	0	0	0	0	0	0	1	3870.573	5140.242	1	56.98609	27.42391
1092					SHQ1	9	C	171502	169979	snoRNA metabolism	molecular function unknown					YIL104C	YIL104C||ebi.ac.uk:Database:sgd;A_06_P3903||www.chem.agilent.com:Database:agp		A_06_P3903	1082047	OLIGO	4.445000007	1.88148148	22	11	1	1092			498	232	1	.05841908623	1	1	0	0	0	0	0	0	0	0	0	536.6052	667.7843	1	13.31174	27.57621
1093					MRPL6	8	C	393285	392641	protein biosynthesis	structural constituent of ribosome					YHR147C	YHR147C||ebi.ac.uk:Database:sgd;A_06_P3725||www.chem.agilent.com:Database:agp		A_06_P3725	1083273	OLIGO	4.656666674	1.88148148	23	11	1	1093			520	232	1	.0528483755	1	1	0	0	0	0	0	0	0	0	0	1000.144	1468.857	1	20.91055	27.38346
1094					GLE1	4	W	88249	89865	poly(A)+ mRNA-nucleus export	molecular function unknown					YDL207W	YDL207W||ebi.ac.uk:Database:sgd;A_06_P1942||www.chem.agilent.com:Database:agp		A_06_P1942	1085503	OLIGO	4.868333341	1.88148148	24	11	1	1094			541	233	1	.05018179827	1	1	0	0	0	0	0	0	0	0	1	1996.366	1811.447	1	31.25569	27.59286
1095						4	C	1483393	1481075	biological process unknown	molecular function unknown					YDR520C	YDR520C||ebi.ac.uk:Database:sgd;A_06_P2513||www.chem.agilent.com:Database:agp		A_06_P2513	1085249	OLIGO	5.080000008	1.88148148	25	11	1	1095			562	232	1	.05336738137	1	1	0	0	0	0	0	0	0	0	1	907.5041	871.6343	1	17.31508	27.44891
1096					RPL37A	12	W	522665	523290	protein biosynthesis	structural constituent of ribosome					YLR185W	YLR185W||ebi.ac.uk:Database:sgd;A_06_P4999||www.chem.agilent.com:Database:agp		A_06_P4999	1083646	OLIGO	5.291666675	1.88148148	26	11	1	1096			583	232	1	.0503404162	1	1	0	0	0	0	0	0	0	0	1	23078.87	32568.62	1	293.5735	27.21429
1097						14	W	274367	276043	biological process unknown	molecular function unknown					YNL193W	YNL193W||ebi.ac.uk:Database:sgd;A_06_P5965||www.chem.agilent.com:Database:agp		A_06_P5965	1085650	OLIGO	5.503333342	1.88148148	27	11	1	1097			604	231	1	.05633643851	1	1	0	0	0	0	0	0	0	0	1	658.3642	685.1145	1	13.105	27.57818
1098					DIA2	15	W	474553	476793	invasive growth (sensu Saccharomyces)*	molecular function unknown					YOR080W	YOR080W||ebi.ac.uk:Database:sgd;A_06_P6442||www.chem.agilent.com:Database:agp		A_06_P6442	1085573	OLIGO	5.715000009	1.88148148	28	11	1	1098			626	233	1	.05353263051	1	1	0	0	0	0	0	0	0	0	0	1143.518	837.775	1	27.14031	27.49084
1099						1	W	57519	57851	biological process unknown	molecular function unknown					YAL044W-A	YAL044W-A||ebi.ac.uk:Database:sgd;A_06_P1070||www.chem.agilent.com:Database:agp		A_06_P1070	1080861	OLIGO	5.926666676	1.88148148	29	11	1	1099			647	231	1	.0559622089	1	1	0	0	0	0	0	1	0	0	0	736.2656	1369.799	1	15.26337	28.01887
1100					MVD1	14	W	701895	703085	ergosterol biosynthesis*	diphosphomevalonate decarboxylase activity					YNR043W	YNR043W||ebi.ac.uk:Database:sgd;A_06_P6156||www.chem.agilent.com:Database:agp		A_06_P6156	1082320	OLIGO	6.138333343	1.88148148	30	11	1	1100			668	232	1	.04941699372	1	1	0	0	0	0	0	0	0	0	1	3497.286	3522.028	1	48.67785	27.58909
1101					SNU13	5	W	101943	102323	nuclear mRNA splicing, via spliceosome*	RNA binding					YEL026W	YEL026W||ebi.ac.uk:Database:sgd;A_06_P2567||www.chem.agilent.com:Database:agp		A_06_P2567	1081613	OLIGO	6.35000001	1.88148148	31	11	1	1101			690	232	1	.04985380374	1	1	0	0	0	0	0	0	0	0	1	2436.156	2819.41	1	32.90391	28.0632
1102					RPL42A	14	W	331322	332154	protein biosynthesis	structural constituent of ribosome					YNL162W	YNL162W||ebi.ac.uk:Database:sgd;A_06_P5933||www.chem.agilent.com:Database:agp		A_06_P5933	1083669	OLIGO	6.561666677	1.88148148	32	11	1	1102			710	232	1	.04952713804	1	1	0	0	0	0	0	0	0	0	1	41977.7	51052.76	1	396.9273	27.91241
1103					RAX2	12	C	300252	296590	bud site selection	molecular function unknown					YLR084C	YLR084C||ebi.ac.uk:Database:sgd;A_06_P4896||www.chem.agilent.com:Database:agp		A_06_P4896	1085752	OLIGO	6.773333344	1.88148148	33	11	1	1103			732	232	1	.05056898647	1	1	0	0	0	0	0	0	0	0	1	1570.36	1529.963	1	19.0051	27.74265
1104					HAC1	6	W	75177	76145	regulation of transcription from RNA polymerase II promoter*	transcription factor activity*					YFL031W	YFL031W||ebi.ac.uk:Database:sgd;A_06_P2857||www.chem.agilent.com:Database:agp		A_06_P2857	1080737	OLIGO	6.985000011	1.88148148	34	11	1	1104			753	232	1	.05565750729	1	1	0	0	0	0	0	0	0	0	0	13604.44	5996.321	1	95.89933	27.66667
1105					WHI4	4	C	56347	54398	regulation of cell size	RNA binding					YDL224C	YDL224C||ebi.ac.uk:Database:sgd;A_06_P1959||www.chem.agilent.com:Database:agp		A_06_P1959	1083534	OLIGO	7.196666678	1.88148148	35	11	1	1105			774	231	1	.05476585908	1	1	0	0	0	0	0	0	0	0	0	1418.244	822.7306	1	21.88964	27.26471
1106					RDR1	15	W	1051286	1052926	response to xenobiotic stimulus	transcription factor activity					YOR380W	YOR380W||ebi.ac.uk:Database:sgd;A_06_P6744||www.chem.agilent.com:Database:agp		A_06_P6744	1086831	OLIGO	7.408333345	1.88148148	36	11	1	1106			795	232	1	.06515475766	1	1	0	0	0	0	0	0	0	0	1	450.9535	415.436	1	13.0893	27.76259
1107					HTD2	8	W	230971	231813	fatty acid biosynthesis	3-hydroxyacyl-[acyl-carrier protein] dehydratase activity					YHR067W	YHR067W||ebi.ac.uk:Database:sgd;A_06_P3640||www.chem.agilent.com:Database:agp		A_06_P3640	1082313	OLIGO	7.620000012	1.88148148	37	11	1	1107			816	232	1	.06467548684	1	1	0	0	0	0	0	0	0	0	0	546.348	378.8441	1	10.19846	27.68978
1108					SLM2	14	C	541880	539910	actin cytoskeleton organization and biogenesis*	phosphoinositide binding					YNL047C	YNL047C||ebi.ac.uk:Database:sgd;A_06_P5818||www.chem.agilent.com:Database:agp		A_06_P5818	1084175	OLIGO	7.831666679	1.88148148	38	11	1	1108			837	232	1	.0557514634	1	1	0	0	0	0	0	0	0	0	0	647.8454	936.2894	1	15.87002	27.45926
1109					CTK2	10	C	424024	423053	protein amino acid phosphorylation*	cyclin-dependent protein kinase regulator activity					YJL006C	YJL006C||ebi.ac.uk:Database:sgd;A_06_P4027||www.chem.agilent.com:Database:agp		A_06_P4027	1082840	OLIGO	8.043333346	1.88148148	39	11	1	1109			859	231	1	.0513883612	1	1	0	0	0	0	0	0	0	0	1	1199.388	1388.682	1	21.71811	27.54348
1110					MRPL51	16	W	729789	730211	protein biosynthesis*	structural constituent of ribosome					YPR100W	YPR100W||ebi.ac.uk:Database:sgd;A_06_P7147||www.chem.agilent.com:Database:agp		A_06_P7147	1085632	OLIGO	8.255000013	1.88148148	40	11	1	1110			880	232	1	.0498951714	1	1	0	0	0	0	0	0	0	0	1	2397.95	2803.212	1	41.25219	27.54826
1111						15	W	83833	85263	biological process unknown	molecular function unknown					YOL125W	YOL125W||ebi.ac.uk:Database:sgd;A_06_P6318||www.chem.agilent.com:Database:agp		A_06_P6318	1084519	OLIGO	8.46666668	1.88148148	41	11	1	1111			900	231	1	.06121658817	1	1	0	0	0	0	0	0	0	0	0	532.1059	1360.571	1	15.12773	27.4037
1112					ELP6	13	W	898404	899225	regulation of transcription from RNA polymerase II promoter	RNA polymerase II transcription elongation factor activity					YMR312W	YMR312W||ebi.ac.uk:Database:sgd;A_06_P5755||www.chem.agilent.com:Database:agp		A_06_P5755	1083416	OLIGO	8.678333347	1.88148148	42	11	1	1112			922	232	1	.06444980812	1	1	0	0	0	0	0	0	0	0	1	467.8274	422.3499	1	13.30401	27.21014
1113						1	C	119542	118565	biological process unknown	molecular function unknown					YAL018C	YAL018C||ebi.ac.uk:Database:sgd;A_06_P1040||www.chem.agilent.com:Database:agp		A_06_P1040	1085733	OLIGO	8.890000014	1.88148148	43	11	1	1113			943	231	1	.4857406663	1	1	0	0	0	0	0	0	0	0	0	35.6232	41.03706	1	4.863871	27.42391
1114						14	W	517248	517841	biological process unknown	molecular function unknown					YNL056W	YNL056W||ebi.ac.uk:Database:sgd;A_06_P5827||www.chem.agilent.com:Database:agp		A_06_P5827	1084989	OLIGO	9.101666681	1.88148148	44	11	1	1114			964	233	1	.05098027582	1	1	0	0	0	0	0	0	0	0	0	1668.511	1378.863	1	28.94527	27.33818
1115					AVT6	5	C	400838	399492	amino acid transport	amino acid transporter activity					YER119C	YER119C||ebi.ac.uk:Database:sgd;A_06_P2751||www.chem.agilent.com:Database:agp		A_06_P2751	1086901	OLIGO	9.313333348	1.88148148	45	11	1	1115			986	232	1	.05308513391	1	1	0	0	0	0	0	0	0	0	0	2253.395	1316.645	1	25.47272	27.23656
1116					YCS4	12	C	687204	683674	mitotic sister chromatid segregation*	molecular function unknown					YLR272C	YLR272C||ebi.ac.uk:Database:sgd;A_06_P5087||www.chem.agilent.com:Database:agp		A_06_P5087	1082115	OLIGO	9.525000015	1.88148148	46	11	1	1116			1006	232	1	.05316844372	1	1	0	0	0	0	0	0	0	0	1	953.7752	881.6245	1	13.46063	27.8
1117					SUR4	12	W	867353	868390	sphingolipid biosynthesis*	fatty acid elongase activity					YLR372W	YLR372W||ebi.ac.uk:Database:sgd;A_06_P5190||www.chem.agilent.com:Database:agp		A_06_P5190	1082521	OLIGO	9.736666682	1.88148148	47	11	1	1117			1028	231	1	.04948248432	1	1	0	0	0	0	0	0	0	0	1	8939.622	7538.843	1	97.53026	27.36502
1118					JJJ3	10	W	612330	612848	peptidyl-diphthamide biosynthesis from peptidyl-histidine	molecular function unknown					YJR097W	YJR097W||ebi.ac.uk:Database:sgd;A_06_P4340||www.chem.agilent.com:Database:agp		A_06_P4340	1082514	OLIGO	9.948333349	1.88148148	48	11	1	1118			1049	233	1	.1263119838	1	1	0	0	0	0	0	0	0	0	0	105.5654	238.2323	1	8.335508	26.83396
1119					TUB3	13	C	23684	22049	mitotic sister chromatid segregation*	structural constituent of cytoskeleton					YML124C	YML124C||ebi.ac.uk:Database:sgd;A_06_P5418||www.chem.agilent.com:Database:agp		A_06_P5418	1084101	OLIGO	10.160000016	1.88148148	49	11	1	1119			1070	232	1	.04950762471	1	1	0	0	0	0	0	0	0	0	1	3243.357	3082.988	1	52.38771	27.15556
1120						7	C	157602	157279							YGL182C	YGL182C||ebi.ac.uk:Database:sgd;A_06_P3137||www.chem.agilent.com:Database:agp		A_06_P3137	1084979	OLIGO	10.371666683	1.88148148	50	11	1	1120			1091	232	1	.549284477	1	1	0	0	0	0	0	0	0	0	0	32.56882	35.0624	1	5.962145	27.05948
1121						12	W	924563	925078							YLR402W	YLR402W||ebi.ac.uk:Database:sgd;A_06_P5220||www.chem.agilent.com:Database:agp		A_06_P5220	1081626	OLIGO	10.58333335	1.88148148	51	11	1	1121			1113	232	1	.5597758922	1	1	0	0	0	0	0	0	0	0	0	25.23814	42.62649	1	3.476783	26.95113
1122						8	C	298611	297387	biological process unknown	molecular function unknown					YHR097C	YHR097C||ebi.ac.uk:Database:sgd;A_06_P3672||www.chem.agilent.com:Database:agp		A_06_P3672	1086803	OLIGO	10.795000017	1.88148148	52	11	1	1122			1133	232	1	.0661496542	1	1	0	0	0	0	0	0	0	0	1	382.0251	463.8258	1	11.37342	26.95683
1123					ADK1	4	W	916480	917148	nucleotide metabolism*	adenylate kinase activity					YDR226W	YDR226W||ebi.ac.uk:Database:sgd;A_06_P2215||www.chem.agilent.com:Database:agp		A_06_P2215	1083543	OLIGO	11.006666684	1.88148148	53	11	1	1123			1155	232	1	.04937836114	1	1	0	0	0	0	0	0	0	0	1	21029.59	24488.51	1	256.8634	26.79859
1124					ENO2	8	W	451326	452639	glycolysis*	phosphopyruvate hydratase activity					YHR174W	YHR174W||ebi.ac.uk:Database:sgd;A_06_P3752||www.chem.agilent.com:Database:agp		A_06_P3752	1083820	OLIGO	11.218333351	1.88148148	54	11	1	1124			1176	232	1	.04921193809	1	1	0	0	0	0	0	1	0	0	1	208776.1	191421.7	1	1619.845	27.15867
1125					AI4	17	W	13818	21935	RNA splicing*	endonuclease activity					Q0065	Q0065||ebi.ac.uk:Database:sgd;A_06_P1007||www.chem.agilent.com:Database:agp		A_06_P1007	1083679	OLIGO	11.430000018	1.88148148	55	11	1	1125			1197	232	1	.05369546801	1	1	0	0	0	0	0	0	0	0	0	2170.094	1211.883	1	32.06978	26.69403
1126						12	C	514715	514110	biological process unknown	molecular function unknown					YLR179C	YLR179C||ebi.ac.uk:Database:sgd;A_06_P4993||www.chem.agilent.com:Database:agp		A_06_P4993	1084028	OLIGO	11.641666685	1.88148148	56	11	1	1126			1218	232	1	.04922803656	1	1	0	0	0	0	0	0	0	0	1	35284.46	38768.41	1	505.0271	26.90672
1127					SLX1	2	W	675308	676222	DNA repair*	5'-flap endonuclease activity					YBR228W	YBR228W||ebi.ac.uk:Database:sgd;A_06_P1481||www.chem.agilent.com:Database:agp		A_06_P1481	1085738	OLIGO	11.853333352	1.88148148	57	11	1	1127			1239	232	1	.07091517473	1	1	0	0	0	0	0	0	0	0	1	319.496	418.5831	1	8.0171	26.97719
1128						4	W	222427	223740	biological process unknown	molecular function unknown					YDL133W	YDL133W||ebi.ac.uk:Database:sgd;A_06_P1866||www.chem.agilent.com:Database:agp		A_06_P1866	1086221	OLIGO	12.065000019	1.88148148	58	11	1	1128			1261	233	1	.04994638109	1	1	0	0	0	0	0	0	0	0	1	2059.488	2219.798	1	33.91674	26.62687
1129					SSO2	13	C	627807	626920	vesicle fusion*	t-SNARE activity					YMR183C	YMR183C||ebi.ac.uk:Database:sgd;A_06_P5620||www.chem.agilent.com:Database:agp		A_06_P5620	1081214	OLIGO	12.276666686	1.88148148	59	11	1	1129			1282	231	1	.04949784251	1	1	0	0	0	0	0	0	0	0	1	3573.794	3982.703	1	49.37954	26.74219
1130					SSB2	14	W	252058	253899	protein biosynthesis	ATPase activity*					YNL209W	YNL209W||ebi.ac.uk:Database:sgd;A_06_P5981||www.chem.agilent.com:Database:agp		A_06_P5981	1086682	OLIGO	12.488333353	1.88148148	60	11	1	1130			1303	232	1	.04990701125	1	1	0	0	0	0	0	0	0	0	1	66109.59	50192.65	1	660.5281	27.02602
1131					RHO5	14	C	300649	299654	Rho protein signal transduction	GTPase activity					YNL180C	YNL180C||ebi.ac.uk:Database:sgd;A_06_P5952||www.chem.agilent.com:Database:agp		A_06_P5952	1081575	OLIGO	12.70000002	1.88148148	61	11	1	1131			1324	232	1	.05080713888	1	1	0	0	0	0	0	0	0	0	1	5563.087	8284.838	1	62.60592	26.52518
1132					SAS2	13	C	523344	522328	chromatin silencing at telomere	acetyltransferase activity*					YMR127C	YMR127C||ebi.ac.uk:Database:sgd;A_06_P5558||www.chem.agilent.com:Database:agp		A_06_P5558	1083582	OLIGO	12.911666687	1.88148148	62	11	1	1132			1345	232	1	.06438905233	1	1	0	0	0	0	0	0	0	0	1	418.2601	476.0527	1	11.43944	27.16912
1133					UBX3	4	C	294759	293392	biological process unknown	molecular function unknown					YDL091C	YDL091C||ebi.ac.uk:Database:sgd;A_06_P1821||www.chem.agilent.com:Database:agp		A_06_P1821	1086557	OLIGO	13.123333354	1.88148148	63	11	1	1133			1366	232	1	.05026038001	1	1	0	0	0	0	0	0	0	0	1	2314.3	1919.824	1	31.86673	27.0292
1134					TFA1	11	W	385401	386849	transcription initiation from RNA polymerase II promoter	general RNA polymerase II transcription factor activity					YKL028W	YKL028W||ebi.ac.uk:Database:sgd;A_06_P4436||www.chem.agilent.com:Database:agp		A_06_P4436	1086445	OLIGO	13.335000021	1.88148148	64	11	1	1134			1387	233	1	.05003832177	1	1	0	0	0	0	0	0	0	0	1	1988.061	2219.353	1	31.0623	26.75849
1135						10	W	126521	126742							YJL156W-A	YJL156W-A||ebi.ac.uk:Database:sgd;A_06_P4178||www.chem.agilent.com:Database:agp		A_06_P4178	1085033	OLIGO	13.546666688	1.88148148	65	11	1	1135			1409	232	1	.4845378307	1	1	0	0	0	0	0	0	0	0	0	39.22256	37.51178	1	5.025672	26.53759
1136						9	C	200116	199643	biological process unknown	molecular function unknown					YIL087C	YIL087C||ebi.ac.uk:Database:sgd;A_06_P3886||www.chem.agilent.com:Database:agp		A_06_P3886	1082007	OLIGO	13.758333355	1.88148148	66	11	1	1136			1430	233	1	.05541588809	1	1	0	0	0	0	0	0	0	0	1	699.1255	750.1679	1	15.36801	26.70696
1137						13	C	95369	94431	biological process unknown	molecular function unknown					YML087C	YML087C||ebi.ac.uk:Database:sgd;A_06_P5377||www.chem.agilent.com:Database:agp		A_06_P5377	1085636	OLIGO	13.970000022	1.88148148	67	11	1	1137			1451	232	1	.05182215182	1	1	0	0	0	0	0	0	0	0	1	1097.349	1162.552	1	22.35771	26.51661
1138					NMA1	12	W	784913	786118	NAD metabolism	nicotinamide-nucleotide adenylyltransferase activity					YLR328W	YLR328W||ebi.ac.uk:Database:sgd;A_06_P5145||www.chem.agilent.com:Database:agp		A_06_P5145	1086660	OLIGO	14.181666689	1.88148148	68	11	1	1138			1472	233	1	.05004325329	1	1	0	0	0	0	0	0	0	0	1	2185.068	1970.455	1	34.46802	26.53114
1139					SOM1	5	C	42624	42400	proteolysis and peptidolysis	molecular function unknown					YEL059C-A	YEL059C-A||ebi.ac.uk:Database:sgd;A_06_P2600||www.chem.agilent.com:Database:agp		A_06_P2600	1082092	OLIGO	14.393333356	1.88148148	69	11	1	1139			1493	232	1	.05243406104	1	1	0	0	0	0	0	0	0	0	0	1403.714	2261.776	1	18.80601	26.89892
1140					RPL7A	7	C	365999	364338	protein biosynthesis	structural constituent of ribosome					YGL076C	YGL076C||ebi.ac.uk:Database:sgd;A_06_P3031||www.chem.agilent.com:Database:agp		A_06_P3031	1082524	OLIGO	14.605000023	1.88148148	70	11	1	1140			1515	233	1	.05136046957	1	1	0	0	0	0	0	0	0	0	0	1413.174	1935.771	1	20.70244	26.85338
1141						7	W	828630	828965							YGR164W	YGR164W||ebi.ac.uk:Database:sgd;A_06_P3385||www.chem.agilent.com:Database:agp		A_06_P3385	1082861	OLIGO	14.81666669	1.88148148	71	11	1	1141			1536	231	1	.5431980672	1	1	0	0	0	0	0	0	0	0	0	27.75357	41.55523	1	3.973864	26.55957
1142					DDR2	15	C	231753	231568	response to stress	molecular function unknown					YOL052C-A	YOL052C-A||ebi.ac.uk:Database:sgd;A_06_P6244||www.chem.agilent.com:Database:agp		A_06_P6244	1081749	OLIGO	15.028333357	1.88148148	72	11	1	1142			1557	233	1	.05108565602	1	1	0	0	0	0	0	0	0	0	0	1710.944	1368.76	1	27.44842	26.71429
1143					ISY1	10	W	528611	529318	nuclear mRNA splicing, via spliceosome	RNA splicing factor activity, transesterification mechanism					YJR050W	YJR050W||ebi.ac.uk:Database:sgd;A_06_P4293||www.chem.agilent.com:Database:agp		A_06_P4293	1080736	OLIGO	15.240000024	1.88148148	73	11	1	1143			1578	232	1	.06141713526	1	1	0	0	0	0	0	0	0	0	1	483.721	522.6509	1	15.37322	26.15054
1144					SNG1	7	C	894145	892502	response to drug	molecular function unknown					YGR197C	YGR197C||ebi.ac.uk:Database:sgd;A_06_P3418||www.chem.agilent.com:Database:agp		A_06_P3418	1081722	OLIGO	15.451666691	1.88148148	74	11	1	1144			1599	233	1	.06216502982	1	1	0	0	0	0	0	0	0	0	1	506.8486	467.077	1	12.65169	26.56786
1145					RSC8	6	C	229173	227500	chromatin remodeling	molecular function unknown					YFR037C	YFR037C||ebi.ac.uk:Database:sgd;A_06_P2935||www.chem.agilent.com:Database:agp		A_06_P2935	1083708	OLIGO	15.663333358	1.88148148	75	11	1	1145			1620	232	1	.05069536268	1	1	0	0	0	0	0	0	0	0	1	5930.95	4075.459	1	74.8604	26.14615
1146					NAT1	4	C	381435	378871	protein amino acid acetylation	peptide alpha-N-acetyltransferase activity					YDL040C	YDL040C||ebi.ac.uk:Database:sgd;A_06_P1768||www.chem.agilent.com:Database:agp		A_06_P1768	1084358	OLIGO	15.875000025	1.88148148	76	11	1	1146			1642	232	1	.05085863199	1	1	0	0	0	0	0	0	0	0	1	1386.567	1444.646	1	15.08277	26.38745
1147						16	C	44344	43283	biological process unknown	molecular function unknown					YPL264C	YPL264C||ebi.ac.uk:Database:sgd;A_06_P7025||www.chem.agilent.com:Database:agp		A_06_P7025	1086558	OLIGO	16.086666692	1.88148148	77	11	1	1147			1663	232	1	.06052258581	1	1	0	0	0	0	0	0	0	0	1	511.8131	535.8078	1	10.17846	26.66667
1148						4	C	494264	492552	biological process unknown	DNA binding					YDR026C	YDR026C||ebi.ac.uk:Database:sgd;A_06_P2011||www.chem.agilent.com:Database:agp		A_06_P2011	1086243	OLIGO	16.298333359	1.88148148	78	11	1	1148			1684	233	1	.05365422278	1	1	0	0	0	0	0	0	0	0	0	1657.861	995.9552	1	28.2981	26.88514
1149					HST4	4	W	842332	843444	chromatin silencing at telomere*	DNA binding					YDR191W	YDR191W||ebi.ac.uk:Database:sgd;A_06_P2180||www.chem.agilent.com:Database:agp		A_06_P2180	1086582	OLIGO	16.510000026	1.88148148	79	11	1	1149			1705	231	1	.06023743067	1	1	0	0	0	0	0	0	0	0	1	537.038	524.5418	1	14.52814	26.58088
1150					GPI2	16	W	410440	411282	GPI anchor biosynthesis	UDP-glycosyltransferase activity					YPL076W	YPL076W||ebi.ac.uk:Database:sgd;A_06_P6835||www.chem.agilent.com:Database:agp		A_06_P6835	1080809	OLIGO	16.721666693	1.88148148	80	11	1	1150			1726	232	1	.1703353171	1	1	0	0	0	0	0	0	0	0	1	131.389	97.44045	1	8.160583	26.25448
1151					COX20	4	C	926904	926287	aerobic respiration*	unfolded protein binding					YDR231C	YDR231C||ebi.ac.uk:Database:sgd;A_06_P2220||www.chem.agilent.com:Database:agp		A_06_P2220	1082062	OLIGO	16.93333336	1.88148148	81	11	1	1151			1747	232	1	.04973968672	1	1	0	0	0	0	0	0	0	0	1	3104.269	2704.319	1	45.58167	26.53091
1152					SRB8	3	W	254367	258650	negative regulation of transcription from RNA polymerase II promoter	RNA polymerase II transcription mediator activity					YCR081W	YCR081W||ebi.ac.uk:Database:sgd;A_06_P1700||www.chem.agilent.com:Database:agp		A_06_P1700	1081369	OLIGO	17.145000027	1.88148148	82	11	1	1152			1768	233	1	.06614555589	1	1	0	0	0	0	0	0	0	0	1	380.1538	467.2511	1	11.69609	26.375
1153					ATP11	14	C	44279	43323	protein complex assembly	unfolded protein binding					YNL315C	YNL315C||ebi.ac.uk:Database:sgd;A_06_P6087||www.chem.agilent.com:Database:agp		A_06_P6087	1084138	OLIGO	17.356666694	1.88148148	83	11	1	1153			1789	232	1	.05099860726	1	1	0	0	0	0	0	0	0	0	0	2220.395	3220.839	1	34.93705	26.15441
1154					URA3	5	W	116167	116970	'de novo' pyrimidine base biosynthesis*	orotidine-5'-phosphate decarboxylase activity					YEL021W	YEL021W||ebi.ac.uk:Database:sgd;A_06_P2562||www.chem.agilent.com:Database:agp		A_06_P2562	1085994	OLIGO	17.568333361	1.88148148	84	11	1	1154			1811	233	1	.05046631514	1	1	0	0	0	0	0	0	0	0	1	4135.067	5827.709	1	53.48515	26.44444
1155					FUM1	16	W	47336	48802	tricarboxylic acid cycle*	fumarate hydratase activity					YPL262W	YPL262W||ebi.ac.uk:Database:sgd;A_06_P7023||www.chem.agilent.com:Database:agp		A_06_P7023	1084220	OLIGO	17.780000028	1.88148148	85	11	1	1155			1832	232	1	.04951997936	1	1	0	0	0	0	0	0	0	0	1	8299.053	9970.461	1	112.6035	26.13406
1156						7	W	312196	312843	biological process unknown	molecular function unknown					YGL101W	YGL101W||ebi.ac.uk:Database:sgd;A_06_P3056||www.chem.agilent.com:Database:agp		A_06_P3056	1086130	OLIGO	17.991666695	1.88148148	86	11	1	1156			1853	233	1	.0531287781	1	1	0	0	0	0	0	0	0	0	0	1755.05	1085.854	1	28.64558	26.21739
1157					BIK1	3	C	69921	68599	mitotic spindle organization and biogenesis in nucleus*	microtubule binding					YCL029C	YCL029C||ebi.ac.uk:Database:sgd;A_06_P1581||www.chem.agilent.com:Database:agp		A_06_P1581	1084327	OLIGO	18.203333362	1.88148148	87	11	1	1157			1874	232	1	.09203679124	1	1	0	0	0	0	0	0	0	0	1	220.6658	256.3235	1	10.78217	25.93382
1158					FAA1	15	W	909338	911440	lipid metabolism*	long-chain-fatty-acid-CoA ligase activity					YOR317W	YOR317W||ebi.ac.uk:Database:sgd;A_06_P6681||www.chem.agilent.com:Database:agp		A_06_P6681	1084753	OLIGO	18.415000029	1.88148148	88	11	1	1158			1896	233	1	.0495505266	1	1	0	0	0	0	0	0	0	0	1	4356.181	3779.465	1	61.87708	25.96183
1159					GLO2	4	W	1009004	1009828	carbohydrate metabolism*	hydroxyacylglutathione hydrolase activity					YDR272W	YDR272W||ebi.ac.uk:Database:sgd;A_06_P2261||www.chem.agilent.com:Database:agp		A_06_P2261	1086117	OLIGO	18.626666696	1.88148148	89	11	1	1159			1917	232	1	.0494527944	1	1	0	0	0	0	0	0	0	0	1	3388.449	3297.337	1	40.19218	25.6
1160						15	C	479638	479297							YOR082C	YOR082C||ebi.ac.uk:Database:sgd;A_06_P6444||www.chem.agilent.com:Database:agp		A_06_P6444	1080858	OLIGO	18.838333363	1.88148148	90	11	1	1160			1938	233	1	.5079001956	1	1	0	0	0	0	0	0	0	0	0	37.33176	35.83678	1	5.948418	25.58065
1161						13	C	473263	472901							YMR103C	YMR103C||ebi.ac.uk:Database:sgd;A_06_P5532||www.chem.agilent.com:Database:agp		A_06_P5532	1086765	OLIGO	19.05000003	1.88148148	91	11	1	1161			1959	232	1	.05424752074	1	1	0	0	0	0	0	0	0	0	1	779.4245	837.986	1	18.63455	26.06618
1162					RPB4	10	W	150879	151544	mRNA-nucleus export*	DNA-directed RNA polymerase activity					YJL140W	YJL140W||ebi.ac.uk:Database:sgd;A_06_P4161||www.chem.agilent.com:Database:agp		A_06_P4161	1086714	OLIGO	19.261666697	1.88148148	92	11	1	1162			1980	233	1	.04952060815	1	1	0	0	0	0	0	0	0	0	1	5276.414	4524.715	1	85.54534	25.87266
1163					AMD1	13	C	208860	206428	purine nucleotide metabolism	AMP deaminase activity					YML035C	YML035C||ebi.ac.uk:Database:sgd;A_06_P5324||www.chem.agilent.com:Database:agp		A_06_P5324	1086613	OLIGO	19.473333364	1.88148148	93	11	1	1163			2001	232	1	.05025681585	1	1	0	0	0	0	0	0	0	0	0	2409.094	3113.211	1	54.47358	25.99625
1164					DPH1	9	W	171748	173025	peptidyl-diphthamide biosynthesis from peptidyl-histidine	molecular function unknown					YIL103W	YIL103W||ebi.ac.uk:Database:sgd;A_06_P3902||www.chem.agilent.com:Database:agp		A_06_P3902	1080926	OLIGO	19.685000031	1.88148148	94	11	1	1164			2023	233	1	.05453302797	1	1	0	0	0	0	0	0	0	0	0	733.3562	1001.748	1	13.44818	25.88636
1165					VMA8	5	W	58378	59148	vacuolar acidification	hydrogen-transporting ATPase activity, rotational mechanism					YEL051W	YEL051W||ebi.ac.uk:Database:sgd;A_06_P2592||www.chem.agilent.com:Database:agp		A_06_P2592	1086671	OLIGO	19.896666698	1.88148148	95	11	1	1165			2043	232	1	.04925001609	1	1	0	0	0	0	0	0	0	0	1	17397.07	15739.46	1	263.4868	25.8365
1166					RDS3	16	W	720635	720958	nuclear mRNA splicing, via spliceosome*	transcription factor activity					YPR094W	YPR094W||ebi.ac.uk:Database:sgd;A_06_P7141||www.chem.agilent.com:Database:agp		A_06_P7141	1082004	OLIGO	20.108333365	1.88148148	96	11	1	1166			2065	233	1	.3385629546	1	1	0	0	0	0	0	0	0	0	1	40.41943	73.42589	1	7.014659	25.99281
1167						2	W	127302	127613							YBL048W	YBL048W||ebi.ac.uk:Database:sgd;A_06_P1178||www.chem.agilent.com:Database:agp		A_06_P1178	1080938	OLIGO	20.320000032	1.88148148	97	11	1	1167			2086	232	1	.05473092939	1	1	0	0	0	0	0	0	0	0	0	754.3389	1183.935	1	17.81672	26.12364
1168					TSC11	5	C	347608	343316	cell wall organization and biogenesis*	protein binding					YER093C	YER093C||ebi.ac.uk:Database:sgd;A_06_P2725||www.chem.agilent.com:Database:agp		A_06_P2725	1085853	OLIGO	20.531666699	1.88148148	98	11	1	1168			2107	233	1	.05583336882	1	1	0	0	0	0	0	0	0	0	1	659.5874	756.4341	1	14.52648	26.28253
1169					LEM3	14	W	31943	33187	cell surface receptor linked signal transduction	transcription regulator activity					YNL323W	YNL323W||ebi.ac.uk:Database:sgd;A_06_P6095||www.chem.agilent.com:Database:agp		A_06_P6095	1083170	OLIGO	20.743333366	1.88148148	99	11	1	1169			2129	231	1	.04947428025	1	1	0	0	0	0	0	0	0	0	1	3374.044	3635.75	1	48.57539	26.26394
1170					RPL24A	7	C	437939	437472	protein biosynthesis	structural constituent of ribosome*					YGL031C	YGL031C||ebi.ac.uk:Database:sgd;A_06_P2986||www.chem.agilent.com:Database:agp		A_06_P2986	1081339	OLIGO	20.955000033	1.88148148	100	11	1	1170			2150	233	1	.04985860722	1	1	0	0	0	0	0	0	0	0	1	3758.821	4722.988	1	48.4502	26.5
1171						3	C	63282	62776	response to oxidative stress	protein-methionine-R-oxide reductase activity					YCL033C	YCL033C||ebi.ac.uk:Database:sgd;A_06_P1585||www.chem.agilent.com:Database:agp		A_06_P1585	1085092	OLIGO	21.1666667	1.88148148	101	11	1	1171			2170	232	1	.05243144012	1	1	0	0	0	0	0	0	0	0	0	1173.918	1777.135	1	21.24557	26.05474
1172					HXT5	8	C	296449	294671	hexose transport	glucose transporter activity*					YHR096C	YHR096C||ebi.ac.uk:Database:sgd;A_06_P3671||www.chem.agilent.com:Database:agp		A_06_P3671	1082169	OLIGO	21.378333367	1.88148148	102	11	1	1172			2191	233	1	.07364691805	1	1	0	0	0	0	0	0	0	0	0	1288.282	292.8302	1	21.05812	26.05535
1173					GDH1	15	C	1043038	1041674	glutamate biosynthesis	glutamate dehydrogenase (NADP+) activity					YOR375C	YOR375C||ebi.ac.uk:Database:sgd;A_06_P6739||www.chem.agilent.com:Database:agp		A_06_P6739	1083445	OLIGO	21.590000034	1.88148148	103	11	1	1173			2213	232	1	.07351473979	1	1	0	0	0	0	0	0	0	0	0	21723.66	3963.424	1	246.3965	26.03957
1174					GAL80	13	W	171594	172901	regulation of transcription, DNA-dependent*	transcription corepressor activity					YML051W	YML051W||ebi.ac.uk:Database:sgd;A_06_P5338||www.chem.agilent.com:Database:agp		A_06_P5338	1085250	OLIGO	21.801666701	1.88148148	104	11	1	1174			2234	233	1	.05433805644	1	1	0	0	0	0	0	0	0	0	0	1194.835	784.1175	1	15.66041	26.18352
1175						15	C	343081	342857	biological process unknown	molecular function unknown					YOR008C-A	YOR008C-A||ebi.ac.uk:Database:sgd;A_06_P6369||www.chem.agilent.com:Database:agp		A_06_P6369	1084768	OLIGO	22.013333368	1.88148148	105	11	1	1175			2255	233	1	.5655801911	1	1	0	0	0	0	0	0	0	0	1	38.37055	27.83951	1	5.964795	25.86142
1176						13	W	173139	174074	biological process unknown	molecular function unknown					YML050W	YML050W||ebi.ac.uk:Database:sgd;A_06_P5337||www.chem.agilent.com:Database:agp		A_06_P5337	1081142	OLIGO	22.225000035	1.88148148	106	11	1	1176			2276	233	1	.1012567866	1	1	0	0	0	0	0	0	0	0	1	245.5781	178.4605	1	7.922926	25.4812
1177					ECM19	12	W	903066	903404	cell wall organization and biogenesis	molecular function unknown					YLR390W	YLR390W||ebi.ac.uk:Database:sgd;A_06_P5208||www.chem.agilent.com:Database:agp		A_06_P5208	1086203	OLIGO	22.436666702	1.88148148	107	11	1	1177			2298	233	1	.09963061787	1	1	0	0	0	0	0	0	0	0	1	184.585	247.6968	1	9.120724	24.24164
1178					COF1	12	C	40413	39803	actin filament organization*	protein binding					YLL050C	YLL050C||ebi.ac.uk:Database:sgd;A_06_P4795||www.chem.agilent.com:Database:agp		A_06_P4795	1086091	OLIGO	0	2.069629628	1	12	1	1178			54	250	1	.04959286161	1	1	0	0	0	0	0	0	0	0	1	7069.207	5836.324	1	110.308	25.86692
1179						4	C	1410084	1407454	biological process unknown	molecular function unknown					YDR475C	YDR475C||ebi.ac.uk:Database:sgd;A_06_P2468||www.chem.agilent.com:Database:agp		A_06_P2468	1085811	OLIGO	.211666667	2.069629628	2	12	1	1179			75	251	1	.2334717304	1	1	0	0	0	0	0	0	0	0	1	70.48219	92.67929	1	7.073418	26.84962
1180					RPN9	4	W	1322195	1323376	ubiquitin-dependent protein catabolism	structural molecule activity					YDR427W	YDR427W||ebi.ac.uk:Database:sgd;A_06_P2420||www.chem.agilent.com:Database:agp		A_06_P2420	1081500	OLIGO	.423333334	2.069629628	3	12	1	1180			96	250	1	.05059221628	1	1	0	0	0	0	0	0	0	0	0	2276.513	3106.957	1	32.2689	27.22059
1181					YAK1	10	C	150308	147885	protein amino acid phosphorylation	protein kinase activity					YJL141C	YJL141C||ebi.ac.uk:Database:sgd;A_06_P4162||www.chem.agilent.com:Database:agp		A_06_P4162	1085013	OLIGO	.635000001	2.069629628	4	12	1	1181			118	251	1	.09476659766	1	1	0	0	0	0	0	0	0	0	1	214.2716	243.2944	1	6.827064	26.67159
1182					YNK1	11	W	314457	314918	purine nucleotide biosynthesis*	nucleoside diphosphate kinase activity					YKL067W	YKL067W||ebi.ac.uk:Database:sgd;A_06_P4477||www.chem.agilent.com:Database:agp		A_06_P4477	1080773	OLIGO	.846666668	2.069629628	5	12	1	1182			139	250	1	.05104814376	1	1	0	0	0	0	0	0	0	0	1	7760.909	11954.07	1	133.9602	27.17669
1183					RRP8	4	W	612069	613220	rRNA processing	methyltransferase activity					YDR083W	YDR083W||ebi.ac.uk:Database:sgd;A_06_P2071||www.chem.agilent.com:Database:agp		A_06_P2071	1083758	OLIGO	1.058333335	2.069629628	6	12	1	1183			160	251	1	.0523348432	1	1	0	0	0	0	0	0	0	0	0	988.6952	1195.32	1	21.78184	27.14981
1184					DBP10	4	W	394214	397201	35S primary transcript processing*	ATP-dependent RNA helicase activity					YDL031W	YDL031W||ebi.ac.uk:Database:sgd;A_06_P1759||www.chem.agilent.com:Database:agp		A_06_P1759	1084770	OLIGO	1.270000002	2.069629628	7	12	1	1184			181	250	1	.05332247973	1	1	0	0	0	0	0	0	0	0	1	973.5516	852.5814	1	13.83648	26.78417
1185					MSC6	15	C	1003220	1001142	meiotic recombination	molecular function unknown					YOR354C	YOR354C||ebi.ac.uk:Database:sgd;A_06_P6718||www.chem.agilent.com:Database:agp		A_06_P6718	1081686	OLIGO	1.481666669	2.069629628	8	12	1	1185			202	251	1	.05108867815	1	1	0	0	0	0	0	0	0	0	0	1336.181	1627.158	1	19.34054	27.10753
1186						14	C	398370	398023	biological process unknown	molecular function unknown					YNL122C	YNL122C||ebi.ac.uk:Database:sgd;A_06_P5893||www.chem.agilent.com:Database:agp		A_06_P5893	1081303	OLIGO	1.693333336	2.069629628	9	12	1	1186			224	250	1	.05179350584	1	1	0	0	0	0	0	0	0	0	0	1536.476	2328.412	1	24.97297	27.21053
1187					YAT2	5	W	202191	204962	alcohol metabolism*	carnitine O-acetyltransferase activity					YER024W	YER024W||ebi.ac.uk:Database:sgd;A_06_P2648||www.chem.agilent.com:Database:agp		A_06_P2648	1084100	OLIGO	1.905000003	2.069629628	10	12	1	1187			245	251	1	.05345653684	1	1	0	0	0	0	0	0	0	0	0	1764.773	3275.152	1	29.13923	27.61852
1188					PXR1	7	C	1051731	1050916	35S primary transcript processing*	RNA binding					YGR280C	YGR280C||ebi.ac.uk:Database:sgd;A_06_P3502||www.chem.agilent.com:Database:agp		A_06_P3502	1083739	OLIGO	2.11666667	2.069629628	11	12	1	1188			266	250	1	.05207547437	1	1	0	0	0	0	0	0	0	0	1	1039.855	1131.4	1	19.20451	27.08712
1189					SYG1	9	C	267822	265114	signal transduction	molecular function unknown					YIL047C	YIL047C||ebi.ac.uk:Database:sgd;A_06_P3847||www.chem.agilent.com:Database:agp		A_06_P3847	1085914	OLIGO	2.328333337	2.069629628	12	12	1	1189			287	251	1	.04957233856	1	1	0	0	0	0	0	0	0	0	1	3182.714	2935.029	1	46.32956	26.94636
1190						16	W	944599	947697	biological process unknown	DNA helicase activity					YPR204W	YPR204W||ebi.ac.uk:Database:sgd;A_06_P7252||www.chem.agilent.com:Database:agp		A_06_P7252	1084895	OLIGO	2.540000004	2.069629628	13	12	1	1190			308	250	1	.04983089462	1	1	0	0	0	0	0	0	0	0	1	20445.59	26527.37	1	275.1181	26.9588
1191						16	W	943876	944184	biological process unknown	molecular function unknown					YPR203W	YPR203W||ebi.ac.uk:Database:sgd;A_06_P7251||www.chem.agilent.com:Database:agp		A_06_P7251	1085078	OLIGO	2.751666671	2.069629628	14	12	1	1191			329	251	1	.06710590185	1	1	0	0	0	0	0	0	0	0	1	367.814	452.8548	1	9.175195	26.7318
1192						16	W	943028	943892	biological process unknown	molecular function unknown					YPR202W	YPR202W||ebi.ac.uk:Database:sgd;A_06_P7250||www.chem.agilent.com:Database:agp		A_06_P7250	1083228	OLIGO	2.963333338	2.069629628	15	12	1	1192			350	250	1	.1638469695	1	1	0	0	0	0	0	0	0	0	1	118.4177	118.187	1	8.197977	26.98529
1193					ARR3	16	W	939918	941132	arsenite transport	arsenite transporter activity					YPR201W	YPR201W||ebi.ac.uk:Database:sgd;A_06_P7249||www.chem.agilent.com:Database:agp		A_06_P7249	1086018	OLIGO	3.175000005	2.069629628	16	12	1	1193			371	250	1	.5883854064	1	1	0	0	0	0	0	0	0	0	0	29.09001	34.12097	1	6.638992	26.41406
1194					ARR2	16	C	939667	939275	response to arsenic	arsenate reductase activity					YPR200C	YPR200C||ebi.ac.uk:Database:sgd;A_06_P7248||www.chem.agilent.com:Database:agp		A_06_P7248	1081927	OLIGO	3.386666672	2.069629628	17	12	1	1194			393	250	1	.1758466331	1	1	0	0	0	0	0	0	0	0	1	110.1162	108.9232	1	7.786054	26.83012
1195					ARR1	16	C	939028	938144	positive regulation of transcription from RNA polymerase II promoter*	RNA polymerase II transcription factor activity					YPR199C	YPR199C||ebi.ac.uk:Database:sgd;A_06_P7247||www.chem.agilent.com:Database:agp		A_06_P7247	1084250	OLIGO	3.598333339	2.069629628	18	12	1	1195			414	251	1	.05065074471	1	1	0	0	0	0	0	0	0	0	0	2145.447	1689.703	1	38.99675	26.92336
1196					SGE1	16	W	934030	935661	response to drug*	xenobiotic-transporting ATPase activity					YPR198W	YPR198W||ebi.ac.uk:Database:sgd;A_06_P7246||www.chem.agilent.com:Database:agp		A_06_P7246	1084730	OLIGO	3.810000006	2.069629628	19	12	1	1196			436	250	1	.05816887005	1	1	0	0	0	0	0	0	0	0	0	876.7306	532.0978	1	12.57122	26.68657
1197						16	C	934457	933894							YPR197C	YPR197C||ebi.ac.uk:Database:sgd;A_06_P7245||www.chem.agilent.com:Database:agp		A_06_P7245	1082518	OLIGO	4.021666673	2.069629628	20	12	1	1197			457	251	1	.5285387829	1	1	0	0	0	0	0	0	0	0	0	25.56217	46.90762	1	4.644317	27.1875
1198						16	W	931372	932784	biological process unknown	molecular function unknown					YPR196W	YPR196W||ebi.ac.uk:Database:sgd;A_06_P7244||www.chem.agilent.com:Database:agp		A_06_P7244	1086839	OLIGO	4.23333334	2.069629628	21	12	1	1198			477	250	1	.2422929265	1	1	0	0	0	0	0	0	0	0	1	54.99653	107.2883	1	6.783966	27.65125
1199						16	C	928290	927961							YPR195C	YPR195C||ebi.ac.uk:Database:sgd;A_06_P7243||www.chem.agilent.com:Database:agp		A_06_P7243	1085014	OLIGO	4.445000007	2.069629628	22	12	1	1199			499	251	1	.5259219456	1	1	0	0	0	0	0	0	0	0	0	33.25609	37.45778	1	5.718694	27.18797
1200					OPT2	16	C	926933	924300	oligopeptide transport	oligopeptide transporter activity					YPR194C	YPR194C||ebi.ac.uk:Database:sgd;A_06_P7242||www.chem.agilent.com:Database:agp		A_06_P7242	1081590	OLIGO	4.656666674	2.069629628	23	12	1	1200			520	249	1	.4892716938	1	1	0	0	0	0	0	0	0	0	0	41.83332	34.38735	1	6.497956	27.48315
1201					HPA2	16	C	923375	922905	histone acetylation	histone acetyltransferase activity					YPR193C	YPR193C||ebi.ac.uk:Database:sgd;A_06_P7241||www.chem.agilent.com:Database:agp		A_06_P7241	1085882	OLIGO	4.868333341	2.069629628	24	12	1	1201			541	251	1	.1443753198	1	1	0	0	0	0	0	0	0	0	1	167.0968	110.4952	1	8.970386	27.62222
1202					AQY1	16	W	921856	922773	sporulation (sensu Fungi)*	water channel activity					YPR192W	YPR192W||ebi.ac.uk:Database:sgd;A_06_P7240||www.chem.agilent.com:Database:agp		A_06_P7240	1081270	OLIGO	5.080000008	2.069629628	25	12	1	1202			562	251	1	.1647308597	1	1	0	0	0	0	0	0	0	0	0	172.5597	78.09172	1	8.080765	27.03774
1203					QCR2	16	W	919377	920483	aerobic respiration*	ubiquinol-cytochrome-c reductase activity					YPR191W	YPR191W||ebi.ac.uk:Database:sgd;A_06_P7239||www.chem.agilent.com:Database:agp		A_06_P7239	1083465	OLIGO	5.291666675	2.069629628	26	12	1	1203			583	251	1	.05077102053	1	1	0	0	0	0	0	0	0	0	1	6505.468	9667.593	1	83.86731	27.58672
1204					RPC82	16	C	919037	917073	transcription from RNA polymerase III promoter	DNA-directed RNA polymerase activity					YPR190C	YPR190C||ebi.ac.uk:Database:sgd;A_06_P7238||www.chem.agilent.com:Database:agp		A_06_P7238	1082173	OLIGO	5.503333342	2.069629628	27	12	1	1204			605	250	1	.05451794959	1	1	0	0	0	0	0	0	0	0	0	734.1219	997.8506	1	14.74628	27.90476
1205					SKI3	16	W	912660	916958	mRNA catabolism*	translation repressor activity					YPR189W	YPR189W||ebi.ac.uk:Database:sgd;A_06_P7237||www.chem.agilent.com:Database:agp		A_06_P7237	1081518	OLIGO	5.715000009	2.069629628	28	12	1	1205			626	251	1	.0527345004	1	1	0	0	0	0	0	0	0	0	1	1028.222	931.2129	1	14.43906	27.93015
1206					MLC2	16	C	912475	911984	cytokinesis, contractile ring contraction	myosin II binding					YPR188C	YPR188C||ebi.ac.uk:Database:sgd;A_06_P7236||www.chem.agilent.com:Database:agp		A_06_P7236	1084493	OLIGO	5.926666676	2.069629628	29	12	1	1206			647	250	1	.05156517135	1	1	0	0	0	0	0	0	0	0	0	2251.132	3523.61	1	33.25675	27.84074
1207					RPO26	16	W	911253	911796	transcription from RNA polymerase II promoter*	DNA-directed RNA polymerase activity					YPR187W	YPR187W||ebi.ac.uk:Database:sgd;A_06_P7235||www.chem.agilent.com:Database:agp		A_06_P7235	1082871	OLIGO	6.138333343	2.069629628	30	12	1	1207			668	251	1	.04926292245	1	1	0	0	0	0	0	0	0	0	1	11676.63	12922.6	1	145.7829	27.80586
1208					PZF1	16	C	911018	909729	transcription initiation from RNA polymerase III promoter	RNA polymerase III transcription factor activity					YPR186C	YPR186C||ebi.ac.uk:Database:sgd;A_06_P7234||www.chem.agilent.com:Database:agp		A_06_P7234	1083207	OLIGO	6.35000001	2.069629628	31	12	1	1208			689	251	1	.05406386226	1	1	0	0	0	0	0	0	0	0	0	811.4982	1221.433	1	14.11429	28.02632
1209					ATG13	16	W	907214	909430	protein-vacuolar targeting*	protein binding					YPR185W	YPR185W||ebi.ac.uk:Database:sgd;A_06_P7233||www.chem.agilent.com:Database:agp		A_06_P7233	1084818	OLIGO	6.561666677	2.069629628	32	12	1	1209			710	251	1	.05383193983	1	1	0	0	0	0	0	0	0	0	1	933.1549	797.191	1	16.22269	27.70189
1210					GDB1	16	W	902040	906650	glycogen catabolism	4-alpha-glucanotransferase activity*					YPR184W	YPR184W||ebi.ac.uk:Database:sgd;A_06_P7232||www.chem.agilent.com:Database:agp		A_06_P7232	1083458	OLIGO	6.773333344	2.069629628	33	12	1	1210			731	250	1	.05094470938	1	1	0	0	0	0	0	0	0	0	0	1980.697	1525.566	1	28.02886	27.69145
1211					DPM1	16	W	900751	901554	protein amino acid N-linked glycosylation*	transferase activity, transferring glycosyl groups*					YPR183W	YPR183W||ebi.ac.uk:Database:sgd;A_06_P7231||www.chem.agilent.com:Database:agp		A_06_P7231	1080722	OLIGO	6.985000011	2.069629628	34	12	1	1211			753	251	1	.04940350905	1	1	0	0	0	0	0	0	0	0	1	5326.156	6038.669	1	78.7432	28.17778
1212					SMX3	16	W	900190	900450	nuclear mRNA splicing, via spliceosome	RNA splicing factor activity, transesterification mechanism					YPR182W	YPR182W||ebi.ac.uk:Database:sgd;A_06_P7230||www.chem.agilent.com:Database:agp		A_06_P7230	1086255	OLIGO	7.196666678	2.069629628	35	12	1	1212			774	250	1	.05311956387	1	1	0	0	0	0	0	0	0	0	1	901.2618	933.9436	1	16.80752	27.60662
1213					SEC23	16	C	899663	897357	ER to Golgi transport*	GTPase activator activity					YPR181C	YPR181C||ebi.ac.uk:Database:sgd;A_06_P7229||www.chem.agilent.com:Database:agp		A_06_P7229	1082351	OLIGO	7.408333345	2.069629628	36	12	1	1213			795	251	1	.05185532324	1	1	0	0	0	0	0	0	0	0	0	5023.079	3044.418	1	42.57107	27.87857
1214					AOS1	16	W	895957	897000	protein sumoylation	SUMO activating enzyme activity					YPR180W	YPR180W||ebi.ac.uk:Database:sgd;A_06_P7228||www.chem.agilent.com:Database:agp		A_06_P7228	1081108	OLIGO	7.620000012	2.069629628	37	12	1	1214			816	250	1	.05315124512	1	1	0	0	0	0	0	0	0	0	1	889.6925	943.0689	1	17.04301	27.24275
1215					HDA3	16	C	895760	893793	regulation of transcription, DNA-dependent*	histone deacetylase activity					YPR179C	YPR179C||ebi.ac.uk:Database:sgd;A_06_P7227||www.chem.agilent.com:Database:agp		A_06_P7227	1086427	OLIGO	7.831666679	2.069629628	38	12	1	1215			837	251	1	.05177276633	1	1	0	0	0	0	0	0	0	0	1	1160.92	1113.609	1	19.37932	27.53933
1216					PRP4	16	W	892328	893725	nuclear mRNA splicing, via spliceosome	RNA splicing factor activity, transesterification mechanism					YPR178W	YPR178W||ebi.ac.uk:Database:sgd;A_06_P7226||www.chem.agilent.com:Database:agp		A_06_P7226	1084456	OLIGO	8.043333346	2.069629628	39	12	1	1216			859	250	1	.05191783154	1	1	0	0	0	0	0	0	0	0	0	1443.581	2188.778	1	27.02363	27.7491
1217						16	C	892680	892309							YPR177C	YPR177C||ebi.ac.uk:Database:sgd;A_06_P7225||www.chem.agilent.com:Database:agp		A_06_P7225	1084635	OLIGO	8.255000013	2.069629628	40	12	1	1217			881	251	1	.5189704255	1	1	0	0	0	0	0	0	0	0	0	32.97157	38.77186	1	4.389785	27.95588
1218					BET2	16	C	892074	891097	protein amino acid geranylgeranylation	Rab-protein geranylgeranyltransferase activity					YPR176C	YPR176C||ebi.ac.uk:Database:sgd;A_06_P7224||www.chem.agilent.com:Database:agp		A_06_P7224	1085661	OLIGO	8.46666668	2.069629628	41	12	1	1218			900	250	1	.05087455105	1	1	0	0	0	0	0	0	0	0	1	1509.264	1372.616	1	27.46928	27.42593
1219					DPB2	16	W	888970	891039	nucleotide-excision repair*	epsilon DNA polymerase activity					YPR175W	YPR175W||ebi.ac.uk:Database:sgd;A_06_P7223||www.chem.agilent.com:Database:agp		A_06_P7223	1081597	OLIGO	8.678333347	2.069629628	42	12	1	1219			922	251	1	.0632061421	1	1	0	0	0	0	0	0	0	0	0	421.7348	527.6024	1	11.21514	27.42652
1220						16	C	888704	888039	biological process unknown	molecular function unknown					YPR174C	YPR174C||ebi.ac.uk:Database:sgd;A_06_P7222||www.chem.agilent.com:Database:agp		A_06_P7222	1082380	OLIGO	8.890000014	2.069629628	43	12	1	1220			943	250	1	.05317491633	1	1	0	0	0	0	0	0	0	0	1	915.7616	903.7028	1	14.54921	28.10487
1221					VPS4	16	C	887833	886520	protein retention in Golgi*	ATPase activity					YPR173C	YPR173C||ebi.ac.uk:Database:sgd;A_06_P7221||www.chem.agilent.com:Database:agp		A_06_P7221	1082710	OLIGO	9.101666681	2.069629628	44	12	1	1221			964	252	1	.04974156674	1	1	0	0	0	0	0	0	0	0	1	7103.791	5665.224	1	83.59979	27.95472
1222						16	W	885792	886394	biological process unknown	molecular function unknown					YPR172W	YPR172W||ebi.ac.uk:Database:sgd;A_06_P7220||www.chem.agilent.com:Database:agp		A_06_P7220	1083249	OLIGO	9.313333348	2.069629628	45	12	1	1222			985	251	1	.05168987858	1	1	0	0	0	0	0	0	0	0	0	1181.709	1541.006	1	21.71928	27.75277
1223					BSP1	16	W	883824	885554	actin cytoskeleton organization and biogenesis*	protein binding, bridging					YPR171W	YPR171W||ebi.ac.uk:Database:sgd;A_06_P7219||www.chem.agilent.com:Database:agp		A_06_P7219	1085167	OLIGO	9.525000015	2.069629628	46	12	1	1223			1007	252	1	.05147062856	1	1	0	0	0	0	0	0	0	0	1	1189.102	1229.381	1	17.3321	27.31868
1224						16	C	883314	882979							YPR170C	YPR170C||ebi.ac.uk:Database:sgd;A_06_P7218||www.chem.agilent.com:Database:agp		A_06_P7218	1085764	OLIGO	9.736666682	2.069629628	47	12	1	1224			1028	250	1	.2655148325	1	1	0	0	0	0	0	0	0	0	1	57.89489	85.83157	1	6.922838	27.6374
1225						16	W	878620	880164	protein monoubiquitination	molecular function unknown					YPR169W	YPR169W||ebi.ac.uk:Database:sgd;A_06_P7217||www.chem.agilent.com:Database:agp		A_06_P7217	1084685	OLIGO	9.948333349	2.069629628	48	12	1	1225			1049	251	1	.05052160099	1	1	0	0	0	0	0	0	0	0	0	2325.278	3144.928	1	35.58447	27.46992
1226					NUT2	16	W	878072	878545	transcription from RNA polymerase II promoter	RNA polymerase II transcription mediator activity					YPR168W	YPR168W||ebi.ac.uk:Database:sgd;A_06_P7216||www.chem.agilent.com:Database:agp		A_06_P7216	1085868	OLIGO	10.160000016	2.069629628	49	12	1	1226			1070	250	1	.1296531298	1	1	0	0	0	0	0	0	0	0	1	164.957	143.955	1	8.159482	26.9313
1227					MET16	16	C	877628	876843	methionine metabolism*	phosphoadenylyl-sulfate reductase (thioredoxin) activity					YPR167C	YPR167C||ebi.ac.uk:Database:sgd;A_06_P7215||www.chem.agilent.com:Database:agp		A_06_P7215	1086635	OLIGO	10.371666683	2.069629628	50	12	1	1227			1092	251	1	.05127521047	1	1	0	0	0	0	0	0	0	0	0	2325.981	3523.439	1	37.90591	27.34317
1228					MRP2	16	C	876625	876278	protein biosynthesis	structural constituent of ribosome					YPR166C	YPR166C||ebi.ac.uk:Database:sgd;A_06_P7214||www.chem.agilent.com:Database:agp		A_06_P7214	1082455	OLIGO	10.58333335	2.069629628	51	12	1	1228			1113	251	1	.0610180381	1	1	0	0	0	0	0	0	0	0	0	458.4927	599.4792	1	8.829929	26.80741
1229					RHO1	16	W	875364	875993	cell wall organization and biogenesis*	GTPase activity*					YPR165W	YPR165W||ebi.ac.uk:Database:sgd;A_06_P7213||www.chem.agilent.com:Database:agp		A_06_P7213	1084370	OLIGO	10.795000017	2.069629628	52	12	1	1229			1134	251	1	.04915000037	1	1	0	0	0	0	0	0	0	0	1	16038.64	15845.66	1	229.1565	27.44528
1230					MMS1	16	W	870699	874922	DNA repair*	molecular function unknown					YPR164W	YPR164W||ebi.ac.uk:Database:sgd;A_06_P7212||www.chem.agilent.com:Database:agp		A_06_P7212	1086074	OLIGO	11.006666684	2.069629628	53	12	1	1230			1155	250	1	.05403153504	1	1	0	0	0	0	0	0	0	0	1	795.5343	861.1389	1	15.49365	27.48485
1231					TIF3	16	C	869951	868641	translational initiation	translation initiation factor activity					YPR163C	YPR163C||ebi.ac.uk:Database:sgd;A_06_P7211||www.chem.agilent.com:Database:agp		A_06_P7211	1083216	OLIGO	11.218333351	2.069629628	54	12	1	1231			1176	251	1	.05010536561	1	1	0	0	0	0	0	1	0	0	1	20704.01	28181.94	1	255.3757	27.27203
1232					ORC4	16	C	868300	866711	DNA replication initiation*	DNA replication origin binding					YPR162C	YPR162C||ebi.ac.uk:Database:sgd;A_06_P7210||www.chem.agilent.com:Database:agp		A_06_P7210	1085073	OLIGO	11.430000018	2.069629628	55	12	1	1232			1197	250	1	.05688154408	1	1	0	0	0	0	0	0	0	0	0	591.0369	758.8747	1	14.89386	26.91321
1233					SGV1	16	C	866418	864445	protein amino acid phosphorylation*	cyclin-dependent protein kinase activity					YPR161C	YPR161C||ebi.ac.uk:Database:sgd;A_06_P7209||www.chem.agilent.com:Database:agp		A_06_P7209	1085454	OLIGO	11.641666685	2.069629628	56	12	1	1233			1218	251	1	.05118349982	1	1	0	0	0	0	0	0	0	0	0	1416.613	1868.476	1	22.17847	27.35316
1234					GPH1	16	W	861302	864010	glycogen catabolism	glycogen phosphorylase activity					YPR160W	YPR160W||ebi.ac.uk:Database:sgd;A_06_P7208||www.chem.agilent.com:Database:agp		A_06_P7208	1086125	OLIGO	11.853333352	2.069629628	57	12	1	1234			1240	251	1	.04923990557	1	1	0	0	0	0	0	0	0	0	1	9092.104	8423.118	1	91.08858	27.22794
1235					KRE6	16	W	857579	859741	cell wall organization and biogenesis*	glucosidase activity					YPR159W	YPR159W||ebi.ac.uk:Database:sgd;A_06_P7207||www.chem.agilent.com:Database:agp		A_06_P7207	1083974	OLIGO	12.065000019	2.069629628	58	12	1	1235			1261	251	1	.0502726344	1	1	0	0	0	0	0	0	0	0	1	4911.47	3618.283	1	64.45407	26.91954
1236						16	W	843258	844016	biological process unknown	molecular function unknown					YPR158W	YPR158W||ebi.ac.uk:Database:sgd;A_06_P7206||www.chem.agilent.com:Database:agp		A_06_P7206	1082879	OLIGO	12.276666686	2.069629628	59	12	1	1236			1282	251	1	.06564559166	1	1	0	0	0	0	0	0	0	0	0	376.1183	497.1723	1	11.12137	26.92692
1237						16	W	841262	842665	biological process unknown	molecular function unknown					YPR157W	YPR157W||ebi.ac.uk:Database:sgd;A_06_P7205||www.chem.agilent.com:Database:agp		A_06_P7205	1086308	OLIGO	12.488333353	2.069629628	60	12	1	1237			1303	251	1	.06467467247	1	1	0	0	0	0	0	1	0	0	0	359.4351	782.383	1	13.7567	26.99265
1238					TPO3	16	C	839773	837905	polyamine transport	spermine transporter activity					YPR156C	YPR156C||ebi.ac.uk:Database:sgd;A_06_P7204||www.chem.agilent.com:Database:agp		A_06_P7204	1086816	OLIGO	12.70000002	2.069629628	61	12	1	1238			1324	250	1	.04965284589	1	1	0	0	0	0	0	0	0	0	1	2692.733	2577.63	1	39.09271	27.29304
1239					NCA2	16	C	837409	835559	aerobic respiration*	molecular function unknown					YPR155C	YPR155C||ebi.ac.uk:Database:sgd;A_06_P7203||www.chem.agilent.com:Database:agp		A_06_P7203	1083498	OLIGO	12.911666687	2.069629628	62	12	1	1239			1345	252	1	.05108915333	1	1	0	0	0	0	0	0	0	0	1	1333.379	1311.101	1	22.41234	26.91007
1240					PIN3	16	W	834561	835208	actin cytoskeleton organization and biogenesis	molecular function unknown					YPR154W	YPR154W||ebi.ac.uk:Database:sgd;A_06_P7202||www.chem.agilent.com:Database:agp		A_06_P7202	1086164	OLIGO	13.123333354	2.069629628	63	12	1	1240			1366	251	1	.05624035307	1	1	0	0	0	0	0	0	0	0	0	808.5384	620.1671	1	15.30354	26.85019
1241						16	W	833807	834241	biological process unknown	molecular function unknown					YPR153W	YPR153W||ebi.ac.uk:Database:sgd;A_06_P7201||www.chem.agilent.com:Database:agp		A_06_P7201	1083596	OLIGO	13.335000021	2.069629628	64	12	1	1241			1387	252	1	.3336467577	1	1	0	0	0	0	0	0	0	0	1	53.16126	59.01204	1	8.09253	26.56061
1242						16	C	833454	832057	biological process unknown	molecular function unknown					YPR152C	YPR152C||ebi.ac.uk:Database:sgd;A_06_P7200||www.chem.agilent.com:Database:agp		A_06_P7200	1080741	OLIGO	13.546666688	2.069629628	65	12	1	1242			1409	251	1	.07138334694	1	1	0	0	0	0	0	0	0	0	1	404.428	320.4144	1	12.17294	26.7509
1243					SUE1	16	C	831671	831051	protein catabolism	molecular function unknown					YPR151C	YPR151C||ebi.ac.uk:Database:sgd;A_06_P7199||www.chem.agilent.com:Database:agp		A_06_P7199	1081013	OLIGO	13.758333355	2.069629628	66	12	1	1243			1430	251	1	.07307088288	1	1	0	0	0	0	0	0	0	0	1	338.5633	345.3011	1	11.01971	26.85393
1244						16	W	830995	831516							YPR150W	YPR150W||ebi.ac.uk:Database:sgd;A_06_P7198||www.chem.agilent.com:Database:agp		A_06_P7198	1081527	OLIGO	13.970000022	2.069629628	67	12	1	1244			1451	251	1	.05632856372	1	1	0	0	0	0	0	0	0	0	0	955.6458	619.1884	1	13.27234	26.95865
1245					NCE102	16	W	829914	830435	protein secretion	molecular function unknown					YPR149W	YPR149W||ebi.ac.uk:Database:sgd;A_06_P7197||www.chem.agilent.com:Database:agp		A_06_P7197	1083092	OLIGO	14.181666689	2.069629628	68	12	1	1245			1473	252	1	.05048592278	1	1	0	0	0	0	0	0	0	0	1	4638.671	3320.25	1	46.22996	26.85171
1246						16	C	828136	826829	biological process unknown	molecular function unknown					YPR148C	YPR148C||ebi.ac.uk:Database:sgd;A_06_P7196||www.chem.agilent.com:Database:agp		A_06_P7196	1082544	OLIGO	14.393333356	2.069629628	69	12	1	1246			1494	251	1	.0507995136	1	1	0	0	0	0	0	0	0	0	0	3977.236	5864.212	1	50.24499	26.88722
1247						16	C	826555	825641	biological process unknown	molecular function unknown					YPR147C	YPR147C||ebi.ac.uk:Database:sgd;A_06_P7195||www.chem.agilent.com:Database:agp		A_06_P7195	1081504	OLIGO	14.605000023	2.069629628	70	12	1	1247			1515	252	1	.05011032082	1	1	0	0	0	0	0	0	0	0	1	1939.28	1857.096	1	30.10698	26.58175
1248						16	C	825672	825343							YPR146C	YPR146C||ebi.ac.uk:Database:sgd;A_06_P7194||www.chem.agilent.com:Database:agp		A_06_P7194	1082709	OLIGO	14.81666669	2.069629628	71	12	1	1248			1536	251	1	.04971838129	1	1	0	0	0	0	0	0	0	0	1	2459.311	2639.655	1	35.4793	26.60563
1249					ASN1	16	W	822616	824334	asparagine biosynthesis	asparagine synthase (glutamine-hydrolyzing) activity					YPR145W	YPR145W||ebi.ac.uk:Database:sgd;A_06_P7193||www.chem.agilent.com:Database:agp		A_06_P7193	1084271	OLIGO	15.028333357	2.069629628	72	12	1	1249			1557	251	1	.05130428482	1	1	0	0	0	0	0	0	0	0	0	3403.579	5309.459	1	31.71469	26.48819
1250					NOC4	16	C	821419	819761	processing of 20S pre-rRNA*	snoRNA binding					YPR144C	YPR144C||ebi.ac.uk:Database:sgd;A_06_P7192||www.chem.agilent.com:Database:agp		A_06_P7192	1083935	OLIGO	15.240000024	2.069629628	73	12	1	1250			1578	251	1	.05453899971	1	1	0	0	0	0	0	0	0	0	0	729.8458	935.1369	1	16.30851	26.69231
1251					RRP15	16	W	818319	819071	processing of 27S pre-rRNA	molecular function unknown					YPR143W	YPR143W||ebi.ac.uk:Database:sgd;A_06_P7191||www.chem.agilent.com:Database:agp		A_06_P7191	1086248	OLIGO	15.451666691	2.069629628	74	12	1	1251			1599	252	1	.05103772328	1	1	0	0	0	0	0	0	0	0	1	1526.515	1320.095	1	22.01017	26.70412
1252						16	C	818689	818126							YPR142C	YPR142C||ebi.ac.uk:Database:sgd;A_06_P7190||www.chem.agilent.com:Database:agp		A_06_P7190	1085965	OLIGO	15.663333358	2.069629628	75	12	1	1252			1620	250	1	.1452843128	1	1	0	0	0	0	0	0	0	0	1	134.8013	135.6931	1	9.434282	26.73571
1253					KAR3	16	C	817919	815730	meiosis*	microtubule motor activity*					YPR141C	YPR141C||ebi.ac.uk:Database:sgd;A_06_P7189||www.chem.agilent.com:Database:agp		A_06_P7189	1081848	OLIGO	15.875000025	2.069629628	76	12	1	1253			1642	251	1	.05292793522	1	1	0	0	0	0	0	0	0	0	1	1048.278	897.2757	1	20.05409	26.71747
1254					TAZ1	16	W	814387	815532	phospholipid biosynthesis*	acyltransferase activity					YPR140W	YPR140W||ebi.ac.uk:Database:sgd;A_06_P7188||www.chem.agilent.com:Database:agp		A_06_P7188	1086482	OLIGO	16.086666692	2.069629628	77	12	1	1254			1663	251	1	.05273370057	1	1	0	0	0	0	0	0	0	0	0	926.2943	1147.477	1	22.71825	27.07224
1255					VPS66	16	C	814054	813152	protein-vacuolar targeting	molecular function unknown					YPR139C	YPR139C||ebi.ac.uk:Database:sgd;A_06_P7187||www.chem.agilent.com:Database:agp		A_06_P7187	1083487	OLIGO	16.298333359	2.069629628	78	12	1	1255			1684	252	1	.05443836572	1	1	0	0	0	0	0	0	0	0	1	839.8073	755.8784	1	15.48857	27.08993
1256					MEP3	16	C	812449	810980	ammonium transport	ammonium transporter activity					YPR138C	YPR138C||ebi.ac.uk:Database:sgd;A_06_P7186||www.chem.agilent.com:Database:agp		A_06_P7186	1086228	OLIGO	16.510000026	2.069629628	79	12	1	1256			1705	251	1	.07023456051	1	1	0	0	0	0	0	0	0	0	0	1902.659	443.1038	1	28.43542	26.9058
1257					RRP9	16	W	802355	804076	rRNA modification*	snoRNA binding					YPR137W	YPR137W||ebi.ac.uk:Database:sgd;A_06_P7185||www.chem.agilent.com:Database:agp		A_06_P7185	1083017	OLIGO	16.721666693	2.069629628	80	12	1	1257			1726	252	1	.05049536082	1	1	0	0	0	0	0	0	0	0	1	1642.502	1945.185	1	25.1228	26.66906
1258						16	C	802833	802321							YPR136C	YPR136C||ebi.ac.uk:Database:sgd;A_06_P7184||www.chem.agilent.com:Database:agp		A_06_P7184	1082182	OLIGO	16.93333336	2.069629628	81	12	1	1258			1747	251	1	.1215559756	1	1	0	0	0	0	0	0	0	0	1	196.0842	141.0433	1	9.982944	26.64338
1259					CTF4	16	W	799230	802013	DNA repair*	DNA binding					YPR135W	YPR135W||ebi.ac.uk:Database:sgd;A_06_P7183||www.chem.agilent.com:Database:agp		A_06_P7183	1083491	OLIGO	17.145000027	2.069629628	82	12	1	1259			1768	252	1	.05076163299	1	1	0	0	0	0	0	0	0	0	1	1440.733	1462.358	1	21.16528	26.60821
1260					MSS18	16	W	798047	798853	Group I intron splicing	molecular function unknown					YPR134W	YPR134W||ebi.ac.uk:Database:sgd;A_06_P7182||www.chem.agilent.com:Database:agp		A_06_P7182	1083342	OLIGO	17.356666694	2.069629628	83	12	1	1260			1790	251	1	.05595967775	1	1	0	0	0	0	0	0	0	0	0	637.8335	952.0564	1	15.99237	26.46768
1261					TOM5	16	W	797553	797705	mitochondrial matrix protein import	protein transporter activity					YPR133W-A	YPR133W-A||ebi.ac.uk:Database:sgd;A_06_P7181||www.chem.agilent.com:Database:agp		A_06_P7181	1080925	OLIGO	17.568333361	2.069629628	84	12	1	1261			1811	251	1	.05221385628	1	1	0	0	0	0	0	0	0	0	1	1117.157	1011.942	1	17.19758	26.79856
1262					IWS1	16	C	797206	795974	RNA elongation from RNA polymerase II promoter	RNA polymerase II transcription elongation factor activity					YPR133C	YPR133C||ebi.ac.uk:Database:sgd;A_06_P7180||www.chem.agilent.com:Database:agp		A_06_P7180	1086069	OLIGO	17.780000028	2.069629628	85	12	1	1262			1832	251	1	.04952087755	1	1	0	0	0	0	0	0	0	0	1	3519.156	3220.112	1	52.53419	26.11111
[truncated: 9,532 more rows]
[truncated: 54 more columns]
