# Supplementary material for: Ammonium Toxicity and Potassium Limitation in Yeast
Source: PLOS journal article supplement (doi:10.1371/journal.pbio.0040351), 2006-10-13
Supplement: S7 (10.1371/journal.pbio.0040351.s007) [file journal.pbio.0040351.s007]

Feature	Chromosome (Tiled)	Begin Coord (Tiled)	End Coord (Tiled)	Region Name (Tiled)	GENE NAME	CHROMOSOME	STRAND	Beginning Coordinate	Ending Coordinate	BIOLOGICAL_PROCESS	MOLECULAR_FUNCTION	DS_GENE_1	DS_GENE_2	Forw Biol Primer Seq	Rev Biol Primer Seq	ORF Name	Sequence Description	Reporter Sequence	Name	SUID	Sequence Type	X-coordinate (whole array, in microns)	Y-coordinate (whole array, in microns)	X Grid Coordinate (within sector)	Y Grid Coordinate (within sector)	Sector	Background Pixel Correlation	Box Bottom	Box Left	Box Right	Box Top	Error Model Used (0|1)	Error of Log Ratio	Feature Is Found (Green) (0|1)	Feature Is Found (Red) (0|1)	Feature Is Green Background Non-uniformity Outlier (0|1)	Feature Is Green Background Population Outlier (0|1)	Feature Is Green Non-uniformity Outlier (0|1)	Feature Is Green Population Outlier (0|1)	Feature Is Red Background Non-uniformity Outlier (0|1)	Feature Is Red Background Population Outlier (0|1)	Feature Is Red Non-uniformity Outlier (0|1)	Feature Is Red Population Outlier (0|1)	Feature Is Used for Normalization (0|1)	Final Processed Green Intensity	Final Processed Red Intensity	GNumBGUsed	GProcessedSigError	Green Background (mean)
1																	BrightCorner||AgilentControlDB		BRIGHTCORNER	1085833	CONTROL	0	0	1	1	1	1			67	39	1	.1601133329	1	1	0	0	1	0	0	0	0	0	0	86878.06	59.13499	1	1906.166	20.66906
2																	(-)3xSLv1||AgilentControlDB;NegativeControl||AgilentControlDB		(-)3XSLV1	1080867	CONTROL	.211666667	0	2	1	1	2			89	40	1	.6863481412	1	1	0	0	0	0	0	0	0	0	0	35.46713	29.46235	1	4.693574	21.11429
3					NHX1	4	W	1367475	1369376	vacuolar acidification*	monovalent inorganic cation transporter activity					YDR456W	YDR456W||ebi.ac.uk:Database:sgd;A_06_P2449||www.chem.agilent.com:Database:agp		A_06_P2449	1086567	OLIGO	.423333334	0	3	1	1	3			110	39	1	.05136959965	1	1	0	0	0	0	0	0	0	0	0	2934.312	2014.481	1	70.11436	21.09375
4					SKI3	16	W	912660	916958	mRNA catabolism*	translation repressor activity					YPR189W	YPR189W||ebi.ac.uk:Database:sgd;A_06_P7237||www.chem.agilent.com:Database:agp		A_06_P7237	1081518	OLIGO	.635000001	0	4	1	1	4			131	41	1	.05846983815	1	1	0	0	0	0	0	0	0	0	0	824.7259	633.5351	1	15.78425	21.28261
5					POL5	5	C	51539	48471	rRNA transcription	molecular function unknown*					YEL055C	YEL055C||ebi.ac.uk:Database:sgd;A_06_P2596||www.chem.agilent.com:Database:agp		A_06_P2596	1085713	OLIGO	.846666668	0	5	1	1	5			153	39	1	.0503748425	1	1	0	0	0	0	0	0	0	0	1	2374.59	2045.068	1	49.11507	21.00699
6						15	W	720417	720815							YOR200W	YOR200W||ebi.ac.uk:Database:sgd;A_06_P6562||www.chem.agilent.com:Database:agp		A_06_P6562	1085202	OLIGO	1.058333335	0	6	1	1	6			174	40	1	.3202100988	1	1	0	0	0	0	0	0	0	0	1	81.21583	59.99066	1	6.400661	21.00697
7					GIS3	12	C	329239	327731	intracellular signaling cascade	molecular function unknown					YLR094C	YLR094C||ebi.ac.uk:Database:sgd;A_06_P4906||www.chem.agilent.com:Database:agp		A_06_P4906	1085648	OLIGO	1.270000002	0	7	1	1	7			195	39	1	.09583771982	1	1	0	0	0	0	0	0	0	0	0	219.3868	334.6255	1	8.932945	20.83803
8																	E1A_r60_n11||AgilentControlDB;(+)E1A_r60_n11||AgilentControlDB		(+)E1A_R60_N11	1545266	CONTROL	1.481666669	0	8	1	1	8			216	40	1	.06653065195	1	1	0	0	0	0	0	0	0	0	0	393.432	929.7108	1	12.40733	20.7148
9					ALG5	16	C	121167	120163	protein amino acid N-linked glycosylation	dolichyl-phosphate beta-glucosyltransferase activity					YPL227C	YPL227C||ebi.ac.uk:Database:sgd;A_06_P6987||www.chem.agilent.com:Database:agp		A_06_P6987	1082651	OLIGO	1.693333336	0	9	1	1	9			237	40	1	.05302497751	1	1	0	0	0	0	0	0	0	0	0	1939.968	1246.023	1	30.00502	20.90391
10					SEC61	12	C	877177	875735	protein-ER targeting*	protein transporter activity					YLR378C	YLR378C||ebi.ac.uk:Database:sgd;A_06_P5196||www.chem.agilent.com:Database:agp		A_06_P5196	1083497	OLIGO	1.905000003	0	10	1	1	10			259	40	1	.04998616486	1	1	0	0	0	0	0	0	0	0	1	5482.737	7163.262	1	77.65119	21.1773
11					GRX2	4	W	1471007	1471438	response to oxidative stress*	thiol-disulfide exchange intermediate activity*					YDR513W	YDR513W||ebi.ac.uk:Database:sgd;A_06_P2506||www.chem.agilent.com:Database:agp		A_06_P2506	1081545	OLIGO	2.11666667	0	11	1	1	11			280	39	1	.05269401351	1	1	0	0	0	0	0	0	0	0	1	1143.607	1189.895	1	23.34379	21.053
12						10	W	461743	462339	biological process unknown	RNA binding					YJR014W	YJR014W||ebi.ac.uk:Database:sgd;A_06_P4261||www.chem.agilent.com:Database:agp		A_06_P4261	1086500	OLIGO	2.328333337	0	12	1	1	12			301	40	1	.05089858795	1	1	0	0	0	0	0	0	0	0	0	2183.067	1752.448	1	35.80906	21.29391
13					SSK1	12	C	163892	161754	osmosensory signaling pathway via two-component system*	enzyme activator activity*					YLR006C	YLR006C||ebi.ac.uk:Database:sgd;A_06_P4818||www.chem.agilent.com:Database:agp		A_06_P4818	1085940	OLIGO	2.540000004	0	13	1	1	13			322	39	1	.1246757046	1	1	0	0	0	0	0	0	0	0	1	205.8428	181.6875	1	7.779277	21.4291
14					CDC48	4	C	238664	236157	ubiquitin-dependent protein catabolism*	ATPase activity					YDL126C	YDL126C||ebi.ac.uk:Database:sgd;A_06_P1857||www.chem.agilent.com:Database:agp		A_06_P1857	1086324	OLIGO	2.751666671	0	14	1	1	14			343	40	1	.04985029342	1	1	0	0	0	0	0	0	0	0	1	25594.59	19667.29	1	367.0858	21.58392
15																	(+)E1A_r60_a104||AgilentControlDB;E1A_r60_a104||AgilentControlDB		(+)E1A_R60_A104	1545260	CONTROL	2.963333338	0	15	1	1	15			364	39	1	.5711435111	1	1	0	0	0	0	0	0	0	0	0	49.88684	29.76036	1	6.14871	21.08651
16					QRI1	4	C	276581	275148	UDP-N-acetylglucosamine biosynthesis	UDP-N-acetylglucosamine diphosphorylase activity					YDL103C	YDL103C||ebi.ac.uk:Database:sgd;A_06_P1833||www.chem.agilent.com:Database:agp		A_06_P1833	1083747	OLIGO	3.175000005	0	16	1	1	16			386	40	1	.05037233482	1	1	0	0	0	0	0	0	0	0	1	2351.178	2036.588	1	38.02489	20.91579
17						17	W	65770	66174							Q0182	Q0182||ebi.ac.uk:Database:sgd;A_06_P1019||www.chem.agilent.com:Database:agp		A_06_P1019	1084037	OLIGO	3.386666672	0	17	1	1	17			406	39	1	.07985892893	1	1	0	0	0	0	0	0	0	0	1	381.2639	326.3545	1	11.5909	21.08834
18					SUP45	2	C	532176	530863	cytokinesis*	translation release factor activity, codon specific					YBR143C	YBR143C||ebi.ac.uk:Database:sgd;A_06_P1395||www.chem.agilent.com:Database:agp		A_06_P1395	1086863	OLIGO	3.598333339	0	18	1	1	18			428	40	1	.04977008926	1	1	0	0	0	0	0	0	0	0	1	7153.757	5713.445	1	110.2336	20.97173
19					RPS14A	3	C	178215	177495	protein biosynthesis*	structural constituent of ribosome*					YCR031C	YCR031C||ebi.ac.uk:Database:sgd;A_06_P1656||www.chem.agilent.com:Database:agp		A_06_P1656	1081279	OLIGO	3.810000006	0	19	1	1	19			449	39	1	.05329428177	1	1	0	0	0	0	0	0	0	0	0	5602.349	10660.87	1	86.32577	21.19217
20						13	C	608210	607827							YMR172C-A	YMR172C-A||ebi.ac.uk:Database:sgd;A_06_P5607||www.chem.agilent.com:Database:agp		A_06_P5607	1085337	OLIGO	4.021666673	0	20	1	1	20			471	41	1	.3432857925	1	1	0	0	0	0	0	0	0	0	1	83.60721	49.88638	1	7.584031	21.29286
21					ISW1	2	C	711534	708145	chromatin remodeling	ATPase activity					YBR245C	YBR245C||ebi.ac.uk:Database:sgd;A_06_P1499||www.chem.agilent.com:Database:agp		A_06_P1499	1084928	OLIGO	4.23333334	0	21	1	1	21			491	39	1	.05109513676	1	1	0	0	0	0	0	0	0	0	0	3072.841	2165.254	1	68.71055	20.9539
22																	E1A_r60_a97||AgilentControlDB;(+)E1A_r60_a97||AgilentControlDB		(+)E1A_R60_A97	1545264	CONTROL	4.445000007	0	22	1	1	22			512	40	1	.6441062828	1	1	0	0	0	0	0	0	0	0	0	32.61912	36.46488	1	5.729773	21.22222
23					PIN2	15	W	517642	518490	biological process unknown	molecular function unknown					YOR104W	YOR104W||ebi.ac.uk:Database:sgd;A_06_P6466||www.chem.agilent.com:Database:agp		A_06_P6466	1081604	OLIGO	4.656666674	0	23	1	1	23			533	39	1	.06335016833	1	1	0	0	0	0	0	0	0	0	1	523.5901	591.3587	1	14.68462	20.72183
24					HSD1	15	C	899923	899051	biological process unknown	molecular function unknown					YOR311C	YOR311C||ebi.ac.uk:Database:sgd;A_06_P6674||www.chem.agilent.com:Database:agp		A_06_P6674	1082369	OLIGO	4.868333341	0	24	1	1	24			555	41	1	.04974588217	1	1	0	0	0	0	0	0	0	0	1	3705.478	4409.444	1	46.6796	20.78369
25					CDC47	2	W	625767	628304	DNA replication initiation*	chromatin binding*					YBR202W	YBR202W||ebi.ac.uk:Database:sgd;A_06_P1455||www.chem.agilent.com:Database:agp		A_06_P1455	1085427	OLIGO	5.080000008	0	25	1	1	25			576	39	1	.06280614951	1	1	0	0	0	0	0	0	0	0	1	564.0838	568.9029	1	11.9203	20.96071
26					MEF1	12	C	273916	271631	translational elongation	translation elongation factor activity					YLR069C	YLR069C||ebi.ac.uk:Database:sgd;A_06_P4881||www.chem.agilent.com:Database:agp		A_06_P4881	1086691	OLIGO	5.291666675	0	26	1	1	26			597	40	1	.0544190115	1	1	0	0	0	0	0	0	0	0	1	959.5812	936.2637	1	18.16271	21.03191
27					ILS1	2	C	84259	81041	protein biosynthesis	isoleucine-tRNA ligase activity					YBL076C	YBL076C||ebi.ac.uk:Database:sgd;A_06_P1208||www.chem.agilent.com:Database:agp		A_06_P1208	1086499	OLIGO	5.503333342	0	27	1	1	27			618	39	1	.04944978089	1	1	0	0	0	0	0	0	0	0	1	22678.27	19086.31	1	336.7686	21.3
28					PRP11	4	C	376477	375677	spliceosome assembly	RNA binding					YDL043C	YDL043C||ebi.ac.uk:Database:sgd;A_06_P1771||www.chem.agilent.com:Database:agp		A_06_P1771	1083264	OLIGO	5.715000009	0	28	1	1	28			639	40	1	.1510952717	1	1	0	0	0	0	0	0	0	0	1	178.5975	134.3177	1	7.242734	21.12715
29																	E1A_r60_a97||AgilentControlDB;(+)E1A_r60_a97||AgilentControlDB		(+)E1A_R60_A97	1545264	CONTROL	5.926666676	0	29	1	1	29			661	39	1	.6619167429	1	1	0	0	0	0	0	0	0	0	0	33.5499	33.59429	1	5.580854	20.8741
30					PTP1	4	W	42701	43708	protein amino acid dephosphorylation	protein tyrosine phosphatase activity					YDL230W	YDL230W||ebi.ac.uk:Database:sgd;A_06_P1965||www.chem.agilent.com:Database:agp		A_06_P1965	1085305	OLIGO	6.138333343	0	30	1	1	30			682	40	1	.06244534557	1	1	0	0	0	0	0	0	0	0	1	529.381	637.8174	1	12.60908	21.08772
31					ARP2	4	W	399337	400635	actin filament organization*	structural constituent of cytoskeleton*					YDL029W	YDL029W||ebi.ac.uk:Database:sgd;A_06_P1757||www.chem.agilent.com:Database:agp		A_06_P1757	1083431	OLIGO	6.35000001	0	31	1	1	31			703	39	1	.04972551815	1	1	0	0	0	0	0	0	0	0	1	3235.049	2970.467	1	48.39738	21.49643
32					PRE1	5	W	177834	178430	response to stress*	endopeptidase activity					YER012W	YER012W||ebi.ac.uk:Database:sgd;A_06_P2634||www.chem.agilent.com:Database:agp		A_06_P2634	1080817	OLIGO	6.561666677	0	32	1	1	32			724	40	1	.05028726852	1	1	0	0	0	0	0	0	0	0	1	2502.943	2148.64	1	56.70435	21.34672
33					FPR4	12	W	1030829	1032007	biological process unknown	peptidyl-prolyl cis-trans isomerase activity					YLR449W	YLR449W||ebi.ac.uk:Database:sgd;A_06_P5268||www.chem.agilent.com:Database:agp		A_06_P5268	1084375	OLIGO	6.773333344	0	33	1	1	33			745	39	1	.04966756347	1	1	0	0	0	0	0	0	0	0	1	3234.606	3061.217	1	62.25204	21.28276
34						12	W	1053626	1054540	biological process unknown	molecular function unknown					YLR455W	YLR455W||ebi.ac.uk:Database:sgd;A_06_P5274||www.chem.agilent.com:Database:agp		A_06_P5274	1082335	OLIGO	6.985000011	0	34	1	1	34			766	40	1	.05732517325	1	1	0	0	0	0	0	0	0	0	0	965.6938	676.2503	1	19.67662	21.29348
35					UBI4	12	C	65206	64061	response to stress*	protein tag*					YLL039C	YLL039C||ebi.ac.uk:Database:sgd;A_06_P4784||www.chem.agilent.com:Database:agp		A_06_P4784	1083026	OLIGO	7.196666678	0	35	1	1	35			788	39	1	.05113826595	1	1	0	0	0	0	0	0	0	0	1	20273.22	12999.25	1	226.233	21.62774
36																	E1A_r60_a135||AgilentControlDB;(+)E1A_r60_a135||AgilentControlDB		(+)E1A_R60_A135	1545258	CONTROL	7.408333345	0	36	1	1	36			809	40	1	.4481550874	1	1	0	0	0	0	0	0	0	0	0	72.61134	32.40121	1	6.407561	21.67719
37					IES4	15	W	689624	689974	biological process unknown	molecular function unknown					YOR189W	YOR189W||ebi.ac.uk:Database:sgd;A_06_P6551||www.chem.agilent.com:Database:agp		A_06_P6551	1081103	OLIGO	7.620000012	0	37	1	1	37			830	39	1	.06529484803	1	1	0	0	0	0	0	0	0	0	0	637.7166	443.7059	1	19.24248	21.55957
38						16	C	678317	677809	biological process unknown	molecular function unknown					YPR063C	YPR063C||ebi.ac.uk:Database:sgd;A_06_P7109||www.chem.agilent.com:Database:agp		A_06_P7109	1085116	OLIGO	7.831666679	0	38	1	1	38			851	40	1	.050375647	1	1	0	0	0	0	0	0	0	0	1	2088.425	2471.665	1	40.06545	21.65
39						3	C	40724	39786	biological process unknown	molecular function unknown					YCL049C	YCL049C||ebi.ac.uk:Database:sgd;A_06_P1601||www.chem.agilent.com:Database:agp		A_06_P1601	1083854	OLIGO	8.043333346	0	39	1	1	39			872	39	1	.05173725825	1	1	0	0	0	0	0	0	0	0	0	1348.732	1664.775	1	29.36414	21.27208
40						10	W	466700	467062							YJR018W	YJR018W||ebi.ac.uk:Database:sgd;A_06_P4265||www.chem.agilent.com:Database:agp		A_06_P4265	1084870	OLIGO	8.255000013	0	40	1	1	40			894	40	1	.1642716554	1	1	0	0	0	0	0	1	0	0	1	168.1751	118.2242	1	7.510849	21.63309
41						12	C	645955	645602							YLR255C	YLR255C||ebi.ac.uk:Database:sgd;A_06_P5069||www.chem.agilent.com:Database:agp		A_06_P5069	1081433	OLIGO	8.46666668	0	41	1	1	41			914	39	1	.1267544978	1	1	0	0	0	0	0	0	0	0	1	196.309	183.2282	1	6.870819	21.50545
42						12	W	94746	95120	biological process unknown	molecular function unknown					YLL025W	YLL025W||ebi.ac.uk:Database:sgd;A_06_P4770||www.chem.agilent.com:Database:agp		A_06_P4770	1083454	OLIGO	8.678333347	0	42	1	1	42			935	40	1	.06282771883	1	1	0	0	0	0	0	0	0	0	0	1857.176	6233.857	1	29.74208	21.37762
43																	E1A_r60_a135||AgilentControlDB;(+)E1A_r60_a135||AgilentControlDB		(+)E1A_R60_A135	1545258	CONTROL	8.890000014	0	43	1	1	43			957	39	1	.4180904568	1	1	0	0	0	0	0	0	0	0	0	76.13699	35.8119	1	6.550955	21.14533
44					THI12	14	W	14832	15854	thiamin biosynthesis	molecular function unknown					YNL332W	YNL332W||ebi.ac.uk:Database:sgd;A_06_P6104||www.chem.agilent.com:Database:agp		A_06_P6104	1081265	OLIGO	9.101666681	0	44	1	1	44			978	40	1	.1200776342	1	1	0	0	0	0	0	0	0	0	0	150.4369	272.1537	1	9.367585	21.2852
45					RSM7	10	C	638890	638147	protein biosynthesis	structural constituent of ribosome					YJR113C	YJR113C||ebi.ac.uk:Database:sgd;A_06_P4356||www.chem.agilent.com:Database:agp		A_06_P4356	1084718	OLIGO	9.313333348	0	45	1	1	45			999	39	1	.04967772441	1	1	0	0	0	0	0	0	0	0	1	3027.997	3023.33	1	49.49171	21.72125
46					LST4	11	C	117991	115505	vesicle-mediated transport*	protein transporter activity					YKL176C	YKL176C||ebi.ac.uk:Database:sgd;A_06_P4589||www.chem.agilent.com:Database:agp		A_06_P4589	1082435	OLIGO	9.525000015	0	46	1	1	46			1020	41	1	.05007445885	1	1	0	0	0	0	0	0	0	0	1	4279.06	3357.506	1	78.5068	21.61702
47					NBP35	7	C	343045	342059	biological process unknown	ATPase activity					YGL091C	YGL091C||ebi.ac.uk:Database:sgd;A_06_P3046||www.chem.agilent.com:Database:agp		A_06_P3046	1084583	OLIGO	9.736666682	0	47	1	1	47			1042	39	1	.05452191735	1	1	0	0	0	0	0	0	0	0	0	1048.722	883.3899	1	25.69922	21.41993
48					TAX4	10	W	278757	280571	cell wall organization and biogenesis*	molecular function unknown					YJL083W	YJL083W||ebi.ac.uk:Database:sgd;A_06_P4105||www.chem.agilent.com:Database:agp		A_06_P4105	1084012	OLIGO	9.948333349	0	48	1	1	48			1063	40	1	.1627499787	1	1	0	0	0	0	0	0	0	0	1	155.6563	130.8941	1	7.535605	21.28169
49						10	C	375690	375031	biological process unknown	molecular function unknown					YJL038C	YJL038C||ebi.ac.uk:Database:sgd;A_06_P4059||www.chem.agilent.com:Database:agp		A_06_P4059	1085907	OLIGO	10.160000016	0	49	1	1	49			1084	39	1	.4201211948	1	1	0	0	0	0	0	0	0	0	0	86.46489	29.92649	1	6.374563	21.24028
50																	E1A_r60_a97||AgilentControlDB;(+)E1A_r60_a97||AgilentControlDB		(+)E1A_R60_A97	1545264	CONTROL	10.371666683	0	50	1	1	50			1105	41	1	.624414278	1	1	0	0	0	0	0	0	0	0	0	40.65135	30.99289	1	5.994261	21.84783
51					AMN1	2	W	556543	558192	negative regulation of exit from mitosis*	protein binding					YBR158W	YBR158W||ebi.ac.uk:Database:sgd;A_06_P1410||www.chem.agilent.com:Database:agp		A_06_P1410	1086594	OLIGO	10.58333335	0	51	1	1	51			1126	39	1	.04930557361	1	1	0	0	0	0	0	0	0	0	1	5406.396	5499.482	1	107.6797	21.2554
52					SEC22	12	W	680202	680846	ER to Golgi transport*	v-SNARE activity					YLR268W	YLR268W||ebi.ac.uk:Database:sgd;A_06_P5083||www.chem.agilent.com:Database:agp		A_06_P5083	1082087	OLIGO	10.795000017	0	52	1	1	52			1147	40	1	.05172158844	1	1	0	0	0	0	0	0	0	0	1	1428.842	1338.803	1	24.24924	21.08333
53					MAP2	2	C	48625	47360	proteolysis and peptidolysis	methionyl aminopeptidase activity					YBL091C	YBL091C||ebi.ac.uk:Database:sgd;A_06_P1223||www.chem.agilent.com:Database:agp		A_06_P1223	1082430	OLIGO	11.006666684	0	53	1	1	53			1169	39	1	.0494229916	1	1	0	0	0	0	0	0	0	0	1	6193.767	5504.245	1	115.1831	21.29057
54					GAP1	11	W	514705	516513	amino acid transport*	L-proline permease activity*					YKR039W	YKR039W||ebi.ac.uk:Database:sgd;A_06_P4677||www.chem.agilent.com:Database:agp		A_06_P4677	1083972	OLIGO	11.218333351	0	54	1	1	54			1190	41	1	.1225041675	1	1	0	0	1	0	0	0	0	0	0	82113.23	2720.874	1	1490.73	21.92254
55					SMY2	2	C	581367	579145	cytoskeleton organization and biogenesis	molecular function unknown					YBR172C	YBR172C||ebi.ac.uk:Database:sgd;A_06_P1425||www.chem.agilent.com:Database:agp		A_06_P1425	1086026	OLIGO	11.430000018	0	55	1	1	55			1211	39	1	.05383982134	1	1	0	0	0	0	0	0	0	0	1	1046.927	977.3868	1	21.89029	21.67857
56					CMK1	6	C	173869	172529	protein amino acid phosphorylation*	calmodulin-dependent protein kinase I activity					YFR014C	YFR014C||ebi.ac.uk:Database:sgd;A_06_P2909||www.chem.agilent.com:Database:agp		A_06_P2909	1082399	OLIGO	11.641666685	0	56	1	1	56			1232	40	1	.05168181229	1	1	0	0	0	0	0	0	0	0	0	2291.463	1610.835	1	44.1696	21.67944
57																	E1A_r60_a22||AgilentControlDB;(+)E1A_r60_a22||AgilentControlDB		(+)E1A_R60_A22	1545265	CONTROL	11.853333352	0	57	1	1	57			1253	40	1	.2328626891	1	1	0	0	0	0	0	0	0	0	0	174.0435	49.33151	1	7.246896	21.44286
58					TOS3	7	C	165097	163415	glucose metabolism	protein kinase activity					YGL179C	YGL179C||ebi.ac.uk:Database:sgd;A_06_P3134||www.chem.agilent.com:Database:agp		A_06_P3134	1082489	OLIGO	12.065000019	0	58	1	1	58			1274	40	1	.06917651564	1	1	0	0	0	0	0	0	0	0	1	486.2177	428.3149	1	15.27548	21.21799
59					RAD53	16	C	264191	261726	DNA repair*	protein threonine/tyrosine kinase activity					YPL153C	YPL153C||ebi.ac.uk:Database:sgd;A_06_P6912||www.chem.agilent.com:Database:agp		A_06_P6912	1082803	OLIGO	12.276666686	0	59	1	1	59			1296	39	1	.06277683737	1	1	0	0	0	0	0	0	0	0	0	669.7855	503.9308	1	16.28918	21.36918
60					ARP7	16	W	639522	640955	chromatin remodeling	general RNA polymerase II transcription factor activity					YPR034W	YPR034W||ebi.ac.uk:Database:sgd;A_06_P7080||www.chem.agilent.com:Database:agp		A_06_P7080	1083717	OLIGO	12.488333353	0	60	1	1	60			1317	40	1	.05127873445	1	1	0	0	0	0	0	0	0	0	0	2185.653	1648.99	1	52.14156	21.48797
61					TMS1	4	C	666765	665344	biological process unknown	molecular function unknown					YDR105C	YDR105C||ebi.ac.uk:Database:sgd;A_06_P2093||www.chem.agilent.com:Database:agp		A_06_P2093	1086624	OLIGO	12.70000002	0	61	1	1	61			1337	39	1	.05051757731	1	1	0	0	0	0	0	0	0	0	1	2270.139	2922.106	1	48.89017	21.88732
62					RNA14	13	W	392754	394787	mRNA polyadenylylation*	RNA binding*					YMR061W	YMR061W||ebi.ac.uk:Database:sgd;A_06_P5488||www.chem.agilent.com:Database:agp		A_06_P5488	1081093	OLIGO	12.911666687	0	62	1	1	62			1359	40	1	.05478649408	1	1	0	0	0	0	0	0	0	0	0	1238.607	861.9838	1	27.85807	21.50355
63						1	W	208358	208654							YAR053W	YAR053W||ebi.ac.uk:Database:sgd;A_06_P1118||www.chem.agilent.com:Database:agp		A_06_P1118	1083325	OLIGO	13.123333354	0	63	1	1	63			1380	39	1	.08223531206	1	1	0	0	0	0	0	0	0	0	0	232.1465	555.1472	1	7.356702	21.27473
64																	(+)E1A_r60_a104||AgilentControlDB;E1A_r60_a104||AgilentControlDB		(+)E1A_R60_A104	1545260	CONTROL	13.335000021	0	64	1	1	64			1402	40	1	.5052061938	1	1	0	0	0	0	0	0	0	0	0	65.23788	28.1641	1	6.280621	21.62369
65					SPR28	4	C	905046	903775	cell wall organization and biogenesis*	structural constituent of cytoskeleton					YDR218C	YDR218C||ebi.ac.uk:Database:sgd;A_06_P2207||www.chem.agilent.com:Database:agp		A_06_P2207	1084902	OLIGO	13.546666688	0	65	1	1	65			1422	39	1	.5157960638	1	1	0	0	0	0	0	0	0	0	0	64.48298	27.24335	1	5.576054	21.28881
66					GYP6	10	C	359592	358216	intracellular protein transport	GTPase activator activity					YJL044C	YJL044C||ebi.ac.uk:Database:sgd;A_06_P4064||www.chem.agilent.com:Database:agp		A_06_P4064	1085099	OLIGO	13.758333355	0	66	1	1	66			1444	41	1	.05648312199	1	1	0	0	0	0	0	0	0	0	1	872.4628	747.1075	1	22.41368	21.625
67						15	W	870199	874068	biological process unknown	molecular function unknown					YOR296W	YOR296W||ebi.ac.uk:Database:sgd;A_06_P6657||www.chem.agilent.com:Database:agp		A_06_P6657	1082036	OLIGO	13.970000022	0	67	1	1	67			1465	39	1	.06489616437	1	1	0	0	0	0	0	0	0	0	0	747.5596	430.1206	1	19.49333	21.2007
68					SHE10	7	W	67598	69331	biological process unknown	molecular function unknown					YGL228W	YGL228W||ebi.ac.uk:Database:sgd;A_06_P3184||www.chem.agilent.com:Database:agp		A_06_P3184	1082256	OLIGO	14.181666689	0	68	1	1	68			1486	40	1	.05160793193	1	1	0	0	0	0	0	0	0	0	0	1900.289	1453.311	1	31.75568	21.67708
69						15	W	817289	818332	biological process unknown	molecular function unknown					YOR262W	YOR262W||ebi.ac.uk:Database:sgd;A_06_P6623||www.chem.agilent.com:Database:agp		A_06_P6623	1085490	OLIGO	14.393333356	0	69	1	1	69			1507	40	1	.05237857919	1	1	0	0	0	0	0	0	0	0	1	1201.91	1245.559	1	23.59112	21.64835
70						7	W	527636	528508	biological process unknown	molecular function unknown					YGR021W	YGR021W||ebi.ac.uk:Database:sgd;A_06_P3241||www.chem.agilent.com:Database:agp		A_06_P3241	1083615	OLIGO	14.605000023	0	70	1	1	70			1528	41	1	.05285738733	1	1	0	0	0	0	0	0	0	0	1	1145.07	1130.093	1	21.71421	21.18375
71																	E1A_r60_a97||AgilentControlDB;(+)E1A_r60_a97||AgilentControlDB		(+)E1A_R60_A97	1545264	CONTROL	14.81666669	0	71	1	1	71			1550	40	1	.5934359523	1	1	0	0	0	0	0	0	0	0	0	44.28855	31.40413	1	6.397081	21.55351
72						14	W	330329	330547	biological process unknown	molecular function unknown					YNL162W-A	YNL162W-A||ebi.ac.uk:Database:sgd;A_06_P5934||www.chem.agilent.com:Database:agp		A_06_P5934	1083877	OLIGO	15.028333357	0	72	1	1	72			1571	40	1	.5800477281	1	1	0	0	0	0	0	0	0	0	0	53.76658	26.24131	1	6.341187	21.80505
73					DIP5	16	W	41043	42869	amino acid transport	amino acid transporter activity*					YPL265W	YPL265W||ebi.ac.uk:Database:sgd;A_06_P7026||www.chem.agilent.com:Database:agp		A_06_P7026	1085839	OLIGO	15.240000024	0	73	1	1	73			1592	39	1	.09983226393	1	1	0	0	0	0	0	0	0	0	0	135.3483	1468.396	1	7.523251	21.43816
74					LYS4	4	W	931123	933204	lysine biosynthesis via aminoadipic acid	homoaconitate hydratase activity					YDR234W	YDR234W||ebi.ac.uk:Database:sgd;A_06_P2223||www.chem.agilent.com:Database:agp		A_06_P2223	1086414	OLIGO	15.451666691	0	74	1	1	74			1613	40	1	.04972430358	1	1	0	0	0	0	0	0	0	0	1	12111.26	15321.55	1	219.8041	21.1831
75						12	W	586466	587575	ubiquitin-dependent protein catabolism	protein binding					YLR224W	YLR224W||ebi.ac.uk:Database:sgd;A_06_P5038||www.chem.agilent.com:Database:agp		A_06_P5038	1085818	OLIGO	15.663333358	0	75	1	1	75			1634	39	1	.05242586229	1	1	0	0	0	0	0	0	0	0	1	1290.91	1170.85	1	25.84523	21.30769
76					RPN5	4	W	190925	192262	ubiquitin-dependent protein catabolism	molecular function unknown					YDL147W	YDL147W||ebi.ac.uk:Database:sgd;A_06_P1880||www.chem.agilent.com:Database:agp		A_06_P1880	1085476	OLIGO	15.875000025	0	76	1	1	76			1655	40	1	.0528448357	1	1	0	0	0	0	0	0	0	0	0	3852.977	2190.726	1	55.94262	21.16084
77					RSM25	9	C	188781	187987	protein biosynthesis	structural constituent of ribosome					YIL093C	YIL093C||ebi.ac.uk:Database:sgd;A_06_P3892||www.chem.agilent.com:Database:agp		A_06_P3892	1086183	OLIGO	16.086666692	0	77	1	1	77			1677	40	1	.0618419495	1	1	0	0	0	0	0	0	0	0	1	627.5903	559.5407	1	17.13337	20.89493
78																	E1A_r60_n9||AgilentControlDB;(+)E1A_r60_n9||AgilentControlDB		(+)E1A_R60_N9	1545267	CONTROL	16.298333359	0	78	1	1	78			1697	40	1	.3845200368	1	1	0	0	0	0	0	0	0	0	0	100.8298	29.97615	1	8.174169	21.22569
79					TOP1	15	C	315387	313078	regulation of transcription from RNA polymerase II promoter*	DNA topoisomerase type I activity					YOL006C	YOL006C||ebi.ac.uk:Database:sgd;A_06_P6196||www.chem.agilent.com:Database:agp		A_06_P6196	1083663	OLIGO	16.510000026	0	79	1	1	79			1719	39	1	.05880457284	1	1	0	0	0	0	0	0	0	0	0	974.0933	605.9499	1	19.61269	21.28975
80						4	C	1153618	1151795	protein biosynthesis	arginine-tRNA ligase activity					YDR341C	YDR341C||ebi.ac.uk:Database:sgd;A_06_P2332||www.chem.agilent.com:Database:agp		A_06_P2332	1082474	OLIGO	16.721666693	0	80	1	1	80			1740	41	1	.0498624741	1	1	0	0	0	0	0	0	0	0	1	5605.628	4461.178	1	95.68153	21.69065
81					RRP9	16	W	802355	804076	rRNA modification*	snoRNA binding					YPR137W	YPR137W||ebi.ac.uk:Database:sgd;A_06_P7185||www.chem.agilent.com:Database:agp		A_06_P7185	1083017	OLIGO	16.93333336	0	81	1	1	81			1761	39	1	.05200080805	1	1	0	0	0	0	0	0	0	0	0	1542.408	1266.142	1	32.92203	21.4927
82						13	W	284101	284640	methionine salvage	oxidoreductase activity, acting on single donors with incorporation of molecular oxygen, incorporation of two atoms of oxygen					YMR009W	YMR009W||ebi.ac.uk:Database:sgd;A_06_P5436||www.chem.agilent.com:Database:agp		A_06_P5436	1080730	OLIGO	17.145000027	0	82	1	1	82			1782	40	1	.06407172802	1	1	0	0	0	0	0	0	0	0	1	559.7586	520.2624	1	10.76646	21.78521
83					TRM82	4	W	784866	786200	tRNA methylation	protein binding*					YDR165W	YDR165W||ebi.ac.uk:Database:sgd;A_06_P2153||www.chem.agilent.com:Database:agp		A_06_P2153	1082765	OLIGO	17.356666694	0	83	1	1	83			1804	39	1	.05756623808	1	1	0	0	0	0	0	0	0	0	0	887.8793	670.1332	1	17.37674	21.68421
84					KAP122	7	W	461671	464916	protein-nucleus import*	protein carrier activity					YGL016W	YGL016W||ebi.ac.uk:Database:sgd;A_06_P2971||www.chem.agilent.com:Database:agp		A_06_P2971	1084900	OLIGO	17.568333361	0	84	1	1	84			1825	41	1	.08269071907	1	1	0	0	0	0	0	0	0	0	1	336.6656	329.7792	1	12.54069	21.51943
85																	(+)E1A_r60_1||AgilentControlDB;E1A_r60_1||AgilentControlDB		(+)E1A_R60_1	1545263	CONTROL	17.780000028	0	85	1	1	85			1846	40	1	.1985662112	1	1	0	0	0	0	0	0	0	0	0	114.6952	115.677	1	7.354054	21.57795
86						8	C	47966	45927	metabolism	molecular function unknown					YHL029C	YHL029C||ebi.ac.uk:Database:sgd;A_06_P3547||www.chem.agilent.com:Database:agp		A_06_P3547	1086106	OLIGO	17.991666695	0	86	1	1	86			1867	40	1	.06276357911	1	1	0	0	0	0	0	0	0	0	1	541.2113	598.494	1	16.43059	21.0424
87					FIN1	4	C	716617	715742	biological process unknown	protein binding					YDR130C	YDR130C||ebi.ac.uk:Database:sgd;A_06_P2118||www.chem.agilent.com:Database:agp		A_06_P2118	1084476	OLIGO	18.203333362	0	87	1	1	87			1888	40	1	.08194912794	1	1	0	0	0	0	0	0	0	0	0	435.6877	271.4531	1	14.95085	21.28723
88					PTK1	11	C	70223	68274	polyamine transport	protein kinase activity					YKL198C	YKL198C||ebi.ac.uk:Database:sgd;A_06_P4611||www.chem.agilent.com:Database:agp		A_06_P4611	1081282	OLIGO	18.415000029	0	88	1	1	88			1909	40	1	.05993240028	1	1	0	0	0	0	0	0	0	0	1	633.3694	659.2062	1	16.64886	21.40411
89						2	W	443246	443584							YBR100W	YBR100W||ebi.ac.uk:Database:sgd;A_06_P1351||www.chem.agilent.com:Database:agp		A_06_P1351	1084713	OLIGO	18.626666696	0	89	1	1	89			1931	40	1	.1072578001	1	1	0	0	0	0	0	0	0	0	0	294.7946	184.4417	1	10.5158	21.27113
90					TIF4632	7	C	409607	406863	translational initiation	translation initiation factor activity					YGL049C	YGL049C||ebi.ac.uk:Database:sgd;A_06_P3004||www.chem.agilent.com:Database:agp		A_06_P3004	1086394	OLIGO	18.838333363	0	90	1	1	90			1952	41	1	.05637103749	1	1	0	0	0	0	0	0	0	0	0	1027.397	731.4668	1	24.42605	21.67708
91					RPN13	12	C	965556	965086	proteolysis and peptidolysis	endopeptidase activity					YLR421C	YLR421C||ebi.ac.uk:Database:sgd;A_06_P5239||www.chem.agilent.com:Database:agp		A_06_P5239	1081178	OLIGO	19.05000003	0	91	1	1	91			1973	40	1	.05341666999	1	1	0	0	0	0	0	0	0	0	0	1468.604	1039.152	1	37.49209	21.74377
92																	E1A_r60_n9||AgilentControlDB;(+)E1A_r60_n9||AgilentControlDB		(+)E1A_R60_N9	1545267	CONTROL	19.261666697	0	92	1	1	92			1994	40	1	.3494920431	1	1	0	0	0	0	0	0	0	0	0	122.0219	28.86487	1	7.460769	21.71777
93					SEC9	7	C	511006	509051	vesicle fusion*	t-SNARE activity					YGR009C	YGR009C||ebi.ac.uk:Database:sgd;A_06_P3229||www.chem.agilent.com:Database:agp		A_06_P3229	1081317	OLIGO	19.473333364	0	93	1	1	93			2015	39	1	.05280736115	1	1	0	0	0	0	0	0	0	0	0	3057.159	1793.506	1	59.72525	21.61268
94					BNI5	14	C	323565	322219	cytokinesis*	molecular function unknown					YNL166C	YNL166C||ebi.ac.uk:Database:sgd;A_06_P5938||www.chem.agilent.com:Database:agp		A_06_P5938	1083352	OLIGO	19.685000031	0	94	1	1	94			2036	40	1	.05542278557	1	1	0	0	0	0	0	0	0	0	0	1300.819	825.8303	1	30.80555	21.61404
95					RBL2	15	W	820451	820771	microtubule cytoskeleton organization and biogenesis*	tubulin binding*					YOR265W	YOR265W||ebi.ac.uk:Database:sgd;A_06_P6626||www.chem.agilent.com:Database:agp		A_06_P6626	1084454	OLIGO	19.896666698	0	95	1	1	95			2057	39	1	.06579076668	1	1	0	0	0	0	0	0	0	0	1	539.7834	478.379	1	15.47679	21.10993
96					LCB2	4	W	576470	578155	sphingolipid biosynthesis	serine C-palmitoyltransferase activity					YDR062W	YDR062W||ebi.ac.uk:Database:sgd;A_06_P2049||www.chem.agilent.com:Database:agp		A_06_P2049	1083061	OLIGO	20.108333365	0	96	1	1	96			2079	40	1	.05027826332	1	1	0	0	0	0	0	0	0	0	1	2506.222	3143.058	1	60.65169	21.38889
97					DER1	2	W	623572	624207	ER-associated protein catabolism	molecular function unknown					YBR201W	YBR201W||ebi.ac.uk:Database:sgd;A_06_P1454||www.chem.agilent.com:Database:agp		A_06_P1454	1086062	OLIGO	20.320000032	0	97	1	1	97			2100	40	1	.0723726986	1	1	0	0	0	0	0	0	0	0	1	438.418	397.7426	1	12.5373	21.78671
98					YMR1	10	W	633530	635596	vesicle-mediated transport*	phosphoric monoester hydrolase activity*					YJR110W	YJR110W||ebi.ac.uk:Database:sgd;A_06_P4353||www.chem.agilent.com:Database:agp		A_06_P4353	1081266	OLIGO	20.531666699	0	98	1	1	98			2121	40	1	.05752233407	1	1	0	0	0	0	0	0	0	0	0	952.3454	666.1443	1	21.0851	21.38931
99																	(+)E1A_r60_a20||AgilentControlDB;E1A_r60_a20||AgilentControlDB		(+)E1A_R60_A20	1545259	CONTROL	20.743333366	0	99	1	1	99			2143	40	1	.2424959854	1	1	0	0	0	0	0	0	0	0	0	155.0625	52.01746	1	7.664374	21.12593
100						12	W	370792	371211							YLR112W	YLR112W||ebi.ac.uk:Database:sgd;A_06_P4925||www.chem.agilent.com:Database:agp		A_06_P4925	1083997	OLIGO	20.955000033	0	100	1	1	100			2163	40	1	.08258759598	1	1	0	0	0	0	0	0	0	0	1	366.072	305.8792	1	13.89838	21.52234
101					RCR2	4	W	454119	454751	biological process unknown	molecular function unknown					YDR003W	YDR003W||ebi.ac.uk:Database:sgd;A_06_P1988||www.chem.agilent.com:Database:agp		A_06_P1988	1084276	OLIGO	21.1666667	0	101	1	1	101			2184	39	1	.05157334898	1	1	0	0	0	0	0	0	0	0	0	2288.025	1631.32	1	46.18523	21.46853
102						14	W	31049	31444							YNL324W	YNL324W||ebi.ac.uk:Database:sgd;A_06_P6096||www.chem.agilent.com:Database:agp		A_06_P6096	1082641	OLIGO	21.378333367	0	102	1	1	102			2206	40	1	.4861348685	1	1	0	0	0	0	0	0	0	0	0	69.51701	28.35448	1	7.596994	21.81915
103					AYT1	12	C	16072	14648	secondary metabolism	trichothecene 3-O-acetyltransferase activity					YLL063C	YLL063C||ebi.ac.uk:Database:sgd;A_06_P4808||www.chem.agilent.com:Database:agp		A_06_P4808	1083192	OLIGO	21.590000034	0	103	1	1	103			2227	39	1	.06447277701	1	1	0	0	0	0	0	0	0	0	1	491.0731	582.2809	1	13.35875	21.83986
104						8	W	465177	465668							YHR180W	YHR180W||ebi.ac.uk:Database:sgd;A_06_P3758||www.chem.agilent.com:Database:agp		A_06_P3758	1083832	OLIGO	21.801666701	0	104	1	1	104			2248	41	1	.2410038816	1	1	0	0	0	0	0	0	0	0	0	131.0757	65.21129	1	9.186374	21.69521
105																	(-)3xSLv1||AgilentControlDB;NegativeControl||AgilentControlDB		(-)3XSLV1	1080867	CONTROL	22.013333368	0	105	1	1	105			2269	41	1	.5421788342	1	1	0	0	0	0	0	0	0	0	0	52.08986	31.70869	1	5.855312	21.4963
106																	BrightCorner||AgilentControlDB		BRIGHTCORNER	1085833	CONTROL	22.225000035	0	106	1	1	106			2290	41	1	.1600751245	1	1	0	0	1	0	0	0	0	0	0	88866.63	39.40914	1	1837.512	21.64706
107																	BrightCorner||AgilentControlDB		BRIGHTCORNER	1085833	CONTROL	22.436666702	0	107	1	1	107			2312	40	1	.1600759141	1	1	0	0	1	0	0	0	0	0	0	82068.73	36.43464	1	1630.339	21.09343
108																	(-)3xSLv1||AgilentControlDB;NegativeControl||AgilentControlDB		(-)3XSLV1	1080867	CONTROL	0	.188148148	1	2	1	108			67	58	1	.5611213904	1	1	0	0	0	0	0	0	0	0	0	53.13427	28.69873	1	6.925901	21.46067
109																	(-)3xSLv1||AgilentControlDB;NegativeControl||AgilentControlDB		(-)3XSLV1	1080867	CONTROL	.211666667	.188148148	2	2	1	109			88	59	1	.6222009475	1	1	0	0	0	0	0	0	0	0	0	40.63405	31.23975	1	4.758561	22.14488
110					RPC34	14	C	635297	634344	transcription from RNA polymerase III promoter	DNA-directed RNA polymerase activity					YNR003C	YNR003C||ebi.ac.uk:Database:sgd;A_06_P6114||www.chem.agilent.com:Database:agp		A_06_P6114	1083705	OLIGO	.423333334	.188148148	3	2	1	110			110	58	1	.05366318953	1	1	0	0	0	0	0	0	0	0	1	1095.974	985.6533	1	22.12489	21.50936
111					HHO1	16	C	309603	308827	regulation of transcription, DNA-dependent*	DNA binding					YPL127C	YPL127C||ebi.ac.uk:Database:sgd;A_06_P6886||www.chem.agilent.com:Database:agp		A_06_P6886	1080728	OLIGO	.635000001	.188148148	4	2	1	111			131	59	1	.05259578806	1	1	0	0	0	0	0	0	0	0	0	3831.093	2228.918	1	56.37302	21.68519
112					KAR1	14	W	286307	287608	spindle pole body duplication in nuclear envelope*	protein binding					YNL188W	YNL188W||ebi.ac.uk:Database:sgd;A_06_P5960||www.chem.agilent.com:Database:agp		A_06_P5960	1083647	OLIGO	.846666668	.188148148	5	2	1	112			153	58	1	.06269057769	1	1	0	0	0	0	0	0	0	0	0	798.9062	479.818	1	17.33161	21.94677
113						11	W	382141	382746							YKL030W	YKL030W||ebi.ac.uk:Database:sgd;A_06_P4438||www.chem.agilent.com:Database:agp		A_06_P4438	1084238	OLIGO	1.058333335	.188148148	6	2	1	113			174	60	1	.2765923372	1	1	0	0	0	0	0	0	0	0	1	57.88517	111.1758	1	5.602867	21.85455
114					DBF20	16	W	747304	748998	protein amino acid phosphorylation*	protein serine/threonine kinase activity					YPR111W	YPR111W||ebi.ac.uk:Database:sgd;A_06_P7158||www.chem.agilent.com:Database:agp		A_06_P7158	1083128	OLIGO	1.270000002	.188148148	7	2	1	114			195	58	1	.08222499874	1	1	0	0	0	0	0	0	0	0	1	364.5445	311.0836	1	9.341136	21.41245
115						9	W	249989	251911	biological process unknown	molecular function unknown					YIL056W	YIL056W||ebi.ac.uk:Database:sgd;A_06_P3856||www.chem.agilent.com:Database:agp		A_06_P3856	1082568	OLIGO	1.481666669	.188148148	8	2	1	115			216	59	1	.08381897662	1	1	0	0	0	0	0	0	0	0	1	293.4151	365.3339	1	8.898296	21.86517
116						9	W	278425	279846	biological process unknown	molecular function unknown					YIL039W	YIL039W||ebi.ac.uk:Database:sgd;A_06_P3839||www.chem.agilent.com:Database:agp		A_06_P3839	1081123	OLIGO	1.693333336	.188148148	9	2	1	116			237	58	1	.05174964077	1	1	0	0	0	0	0	0	0	0	1	1337.189	1405.053	1	24.79309	21.45956
117					PFD1	10	W	88785	89114	protein folding*	unfolded protein binding					YJL179W	YJL179W||ebi.ac.uk:Database:sgd;A_06_P4201||www.chem.agilent.com:Database:agp		A_06_P4201	1082221	OLIGO	1.905000003	.188148148	10	2	1	117			258	59	1	.05826541544	1	1	0	0	0	0	0	0	0	0	1	736.2319	683.7398	1	17.7116	21.44444
118					PEX1	11	C	73870	70739	peroxisome organization and biogenesis	ATPase activity					YKL197C	YKL197C||ebi.ac.uk:Database:sgd;A_06_P4610||www.chem.agilent.com:Database:agp		A_06_P4610	1086252	OLIGO	2.11666667	.188148148	11	2	1	118			279	58	1	.0583640536	1	1	0	0	0	0	0	0	0	0	1	744.3233	671.6249	1	15.2233	21.48679
119					IWR1	4	C	254717	253995	meiosis	molecular function unknown					YDL115C	YDL115C||ebi.ac.uk:Database:sgd;A_06_P1846||www.chem.agilent.com:Database:agp		A_06_P1846	1085268	OLIGO	2.328333337	.188148148	12	2	1	119			300	59	1	.0564156787	1	1	0	0	0	0	0	0	0	0	0	1168.094	739.9574	1	18.25517	22.06464
120						7	W	976420	976728							YGR242W	YGR242W||ebi.ac.uk:Database:sgd;A_06_P3463||www.chem.agilent.com:Database:agp		A_06_P3463	1082147	OLIGO	2.540000004	.188148148	13	2	1	120			322	58	1	.4063535321	1	1	0	0	0	0	0	0	0	0	1	63.11803	47.52285	1	6.48145	21.95472
121					FUR4	2	W	281443	283344	uracil transport	uracil permease activity					YBR021W	YBR021W||ebi.ac.uk:Database:sgd;A_06_P1268||www.chem.agilent.com:Database:agp		A_06_P1268	1081076	OLIGO	2.751666671	.188148148	14	2	1	121			343	59	1	.05298089808	1	1	0	0	0	0	0	0	0	0	1	1073.558	1204.032	1	27.52669	21.95556
122					APC11	4	W	433494	433991	mitotic sister chromatid segregation*	protein binding*					YDL008W	YDL008W||ebi.ac.uk:Database:sgd;A_06_P1736||www.chem.agilent.com:Database:agp		A_06_P1736	1085499	OLIGO	2.963333338	.188148148	15	2	1	122			364	58	1	.1336461251	1	1	0	0	0	0	0	0	0	0	1	184.1943	172.5871	1	7.243582	21.75986
123					PEX14	7	W	216278	217303	protein-peroxisome targeting*	protein binding					YGL153W	YGL153W||ebi.ac.uk:Database:sgd;A_06_P3108||www.chem.agilent.com:Database:agp		A_06_P3108	1082317	OLIGO	3.175000005	.188148148	16	2	1	123			386	59	1	.06332214125	1	1	0	0	0	0	0	0	0	0	0	759.7771	467.0944	1	15.58764	21.84015
124					CHS6	10	W	239331	241571	Golgi to plasma membrane transport*	molecular function unknown					YJL099W	YJL099W||ebi.ac.uk:Database:sgd;A_06_P4121||www.chem.agilent.com:Database:agp		A_06_P4121	1080962	OLIGO	3.386666672	.188148148	17	2	1	124			406	58	1	.08911756645	1	1	0	0	0	0	0	0	0	0	1	338.6089	264.0013	1	8.929363	21.85609
125						2	C	744393	742756	biological process unknown	molecular function unknown					YBR270C	YBR270C||ebi.ac.uk:Database:sgd;A_06_P1524||www.chem.agilent.com:Database:agp		A_06_P1524	1083114	OLIGO	3.598333339	.188148148	18	2	1	125			428	59	1	.1012713039	1	1	0	0	0	0	0	1	0	0	1	258.7351	242.0959	1	10.1784	21.59854
126					BBP1	16	W	67725	68882	microtubule nucleation*	structural constituent of cytoskeleton					YPL255W	YPL255W||ebi.ac.uk:Database:sgd;A_06_P7016||www.chem.agilent.com:Database:agp		A_06_P7016	1085728	OLIGO	3.810000006	.188148148	19	2	1	126			449	58	1	.07241979259	1	1	0	0	0	0	0	0	0	0	0	494.7093	360.6382	1	13.44515	21.87594
127					MRPS16	16	C	529347	528982	protein biosynthesis	structural constituent of ribosome					YPL013C	YPL013C||ebi.ac.uk:Database:sgd;A_06_P6772||www.chem.agilent.com:Database:agp		A_06_P6772	1086004	OLIGO	4.021666673	.188148148	20	2	1	127			470	59	1	.05243708424	1	1	0	0	0	0	0	0	0	0	1	1188.89	1237.235	1	20.05338	21.88561
128					ALD2	13	C	603081	601561	aldehyde metabolism*	aldehyde dehydrogenase activity					YMR170C	YMR170C||ebi.ac.uk:Database:sgd;A_06_P5605||www.chem.agilent.com:Database:agp		A_06_P5605	1081070	OLIGO	4.23333334	.188148148	21	2	1	128			491	58	1	.05188709525	1	1	0	0	0	0	0	0	0	0	1	1284.462	1474.505	1	25.55676	22.00763
129						1	W	45900	48251	biological process unknown	molecular function unknown					YAL053W	YAL053W||ebi.ac.uk:Database:sgd;A_06_P1077||www.chem.agilent.com:Database:agp		A_06_P1077	1082743	OLIGO	4.445000007	.188148148	22	2	1	129			512	59	1	.04933682014	1	1	0	0	0	0	0	0	0	0	1	5383.266	5732.968	1	75.34857	21.81985
130					DBR1	11	C	168834	167617	snoRNA metabolism*	RNA lariat debranching enzyme activity					YKL149C	YKL149C||ebi.ac.uk:Database:sgd;A_06_P4561||www.chem.agilent.com:Database:agp		A_06_P4561	1083769	OLIGO	4.656666674	.188148148	23	2	1	130			533	58	1	.07197295548	1	1	0	0	0	0	0	0	0	0	0	493.447	368.6885	1	13.08847	21.69708
131					PEX15	15	W	247148	248299	peroxisome organization and biogenesis*	molecular function unknown					YOL044W	YOL044W||ebi.ac.uk:Database:sgd;A_06_P6235||www.chem.agilent.com:Database:agp		A_06_P6235	1085417	OLIGO	4.868333341	.188148148	24	2	1	131			555	59	1	.06135906051	1	1	0	0	0	0	0	0	0	0	0	680.5974	550.6377	1	12.86213	21.60324
132						12	W	472114	472458	biological process unknown	molecular function unknown					YLR156W	YLR156W||ebi.ac.uk:Database:sgd;A_06_P4970||www.chem.agilent.com:Database:agp		A_06_P4970	1084588	OLIGO	5.080000008	.188148148	25	2	1	132			576	58	1	.08341420054	1	1	0	0	0	0	0	0	0	0	0	507.6112	233.8577	1	10.35475	21.57813
133						16	W	758646	759479	biological process unknown	molecular function unknown					YPR116W	YPR116W||ebi.ac.uk:Database:sgd;A_06_P7163||www.chem.agilent.com:Database:agp		A_06_P7163	1083428	OLIGO	5.291666675	.188148148	26	2	1	133			597	59	1	.09291888434	1	1	0	0	0	0	0	0	0	0	1	321.4228	247.0085	1	11.61197	21.62214
134					RRN11	13	C	191767	190244	transcription from RNA polymerase I promoter	RNA polymerase I transcription factor activity					YML043C	YML043C||ebi.ac.uk:Database:sgd;A_06_P5331||www.chem.agilent.com:Database:agp		A_06_P5331	1082512	OLIGO	5.503333342	.188148148	27	2	1	134			618	58	1	.0628027406	1	1	0	0	0	0	0	0	0	0	0	670.1519	502.9599	1	16.62742	21.82545
135						9	W	189063	190964	biological process unknown	molecular function unknown					YIL092W	YIL092W||ebi.ac.uk:Database:sgd;A_06_P3891||www.chem.agilent.com:Database:agp		A_06_P3891	1080819	OLIGO	5.715000009	.188148148	28	2	1	135			639	59	1	.1001375631	1	1	0	0	0	0	0	0	0	0	0	315.257	206.4777	1	8.635226	21.75812
136					FPR3	13	C	121324	120089	biological process unknown	peptidyl-prolyl cis-trans isomerase activity					YML074C	YML074C||ebi.ac.uk:Database:sgd;A_06_P5363||www.chem.agilent.com:Database:agp		A_06_P5363	1082913	OLIGO	5.926666676	.188148148	29	2	1	136			661	58	1	.04997177982	1	1	0	0	0	0	0	0	0	0	1	3878.187	3154.362	1	54.20638	21.59707
137					PBP4	4	C	362256	361699	biological process unknown	molecular function unknown					YDL053C	YDL053C||ebi.ac.uk:Database:sgd;A_06_P1782||www.chem.agilent.com:Database:agp		A_06_P1782	1084079	OLIGO	6.138333343	.188148148	30	2	1	137			682	59	1	.05097457383	1	1	0	0	0	0	0	0	0	0	1	1606.782	1837.152	1	18.32551	21.57588
138					NAT5	15	W	804376	804906	protein amino acid acetylation	peptide alpha-N-acetyltransferase activity					YOR253W	YOR253W||ebi.ac.uk:Database:sgd;A_06_P6614||www.chem.agilent.com:Database:agp		A_06_P6614	1086675	OLIGO	6.35000001	.188148148	31	2	1	138			703	58	1	.0503309475	1	1	0	0	0	0	0	0	0	0	1	2161.863	2004.83	1	36.70441	22.06159
139					ADK2	5	W	525969	526646	nucleotide metabolism	adenylate kinase activity					YER170W	YER170W||ebi.ac.uk:Database:sgd;A_06_P2802||www.chem.agilent.com:Database:agp		A_06_P2802	1080646	OLIGO	6.561666677	.188148148	32	2	1	139			724	59	1	.1662167729	1	1	0	0	0	0	0	0	0	0	1	162.4495	119.4063	1	7.194492	21.93382
140					IDP2	12	W	504593	505831	glutamate biosynthesis*	isocitrate dehydrogenase (NADP+) activity					YLR174W	YLR174W||ebi.ac.uk:Database:sgd;A_06_P4988||www.chem.agilent.com:Database:agp		A_06_P4988	1083584	OLIGO	6.773333344	.188148148	33	2	1	140			745	58	1	.07188958034	1	1	0	0	0	0	0	0	0	0	1	430.7009	414.2182	1	11.28277	21.92727
141					SMM1	14	W	653387	654541	tRNA modification*	tRNA dihydrouridine synthase activity					YNR015W	YNR015W||ebi.ac.uk:Database:sgd;A_06_P6126||www.chem.agilent.com:Database:agp		A_06_P6126	1081636	OLIGO	6.985000011	.188148148	34	2	1	141			766	59	1	.1014801066	1	1	0	0	0	0	0	0	0	0	1	245.4397	253.8019	1	9.131238	21.80576
142						2	C	615851	615198	biological process unknown	molecular function unknown					YBR197C	YBR197C||ebi.ac.uk:Database:sgd;A_06_P1450||www.chem.agilent.com:Database:agp		A_06_P1450	1081409	OLIGO	7.196666678	.188148148	35	2	1	142			787	58	1	.07982253086	1	1	0	0	0	0	0	0	0	0	1	369.381	336.4546	1	9.099029	22.14232
143					RBS1	4	W	122217	123590	galactose metabolism	molecular function unknown					YDL189W	YDL189W||ebi.ac.uk:Database:sgd;A_06_P1924||www.chem.agilent.com:Database:agp		A_06_P1924	1086010	OLIGO	7.408333345	.188148148	36	2	1	143			809	59	1	.05444560288	1	1	0	0	0	0	0	0	0	0	0	1079.461	886.9674	1	19.6771	22.01141
144					SVL3	16	C	491362	488885	endocytosis	molecular function unknown					YPL032C	YPL032C||ebi.ac.uk:Database:sgd;A_06_P6791||www.chem.agilent.com:Database:agp		A_06_P6791	1085653	OLIGO	7.620000012	.188148148	37	2	1	144			830	58	1	.05864326599	1	1	0	0	0	0	0	0	0	0	0	617.9743	862.5335	1	11.28972	21.97328
145					HRK1	15	C	824864	822585	cell ion homeostasis	protein kinase activity					YOR267C	YOR267C||ebi.ac.uk:Database:sgd;A_06_P6628||www.chem.agilent.com:Database:agp		A_06_P6628	1085793	OLIGO	7.831666679	.188148148	38	2	1	145			851	59	1	.05856245953	1	1	0	0	0	0	0	0	0	0	0	617.4412	906.034	1	14.29683	22.20677
146						4	W	1039722	1042955	biological process unknown	helicase activity					YDR291W	YDR291W||ebi.ac.uk:Database:sgd;A_06_P2280||www.chem.agilent.com:Database:agp		A_06_P2280	1080686	OLIGO	8.043333346	.188148148	39	2	1	146			873	58	1	.05793012808	1	1	0	0	0	0	0	0	0	0	1	731.2087	713.6363	1	12.70113	22.06137
147					FES1	2	C	444687	443815	protein biosynthesis	adenyl-nucleotide exchange factor activity					YBR101C	YBR101C||ebi.ac.uk:Database:sgd;A_06_P1352||www.chem.agilent.com:Database:agp		A_06_P1352	1082744	OLIGO	8.255000013	.188148148	40	2	1	147			894	59	1	.0503050659	1	1	0	0	0	0	0	0	0	0	1	2034.854	2084.121	1	35.95536	22.36727
148					RIM11	13	W	546124	547236	protein amino acid phosphorylation*	protein serine/threonine kinase activity*					YMR139W	YMR139W||ebi.ac.uk:Database:sgd;A_06_P5571||www.chem.agilent.com:Database:agp		A_06_P5571	1081348	OLIGO	8.46666668	.188148148	41	2	1	148			914	58	1	.06007523914	1	1	0	0	0	0	0	0	0	0	1	646.9087	635.5181	1	17.4499	22.15185
149						9	W	246911	247195							YIL058W	YIL058W||ebi.ac.uk:Database:sgd;A_06_P3858||www.chem.agilent.com:Database:agp		A_06_P3858	1080906	OLIGO	8.678333347	.188148148	42	2	1	149			935	59	1	.329307433	1	1	0	0	0	0	0	0	0	0	1	75.03437	61.54887	1	6.32316	22.19776
150					TDP1	2	C	670292	668658	DNA repair	tyrosyl-DNA phosophodiesterase activity					YBR223C	YBR223C||ebi.ac.uk:Database:sgd;A_06_P1476||www.chem.agilent.com:Database:agp		A_06_P1476	1082076	OLIGO	8.890000014	.188148148	43	2	1	150			956	58	1	.08864543583	1	1	0	0	0	0	0	0	0	0	0	250.0602	366.2877	1	7.717275	22.31295
151						16	W	841262	842665	biological process unknown	molecular function unknown					YPR157W	YPR157W||ebi.ac.uk:Database:sgd;A_06_P7205||www.chem.agilent.com:Database:agp		A_06_P7205	1086308	OLIGO	9.101666681	.188148148	44	2	1	151			978	59	1	.06990413537	1	1	0	0	0	0	0	0	0	0	0	340.3472	730.1697	1	10.34199	22.02174
152					STT4	12	C	743865	738163	actin cytoskeleton organization and biogenesis*	1-phosphatidylinositol 4-kinase activity					YLR305C	YLR305C||ebi.ac.uk:Database:sgd;A_06_P5121||www.chem.agilent.com:Database:agp		A_06_P5121	1086821	OLIGO	9.313333348	.188148148	45	2	1	152			999	58	1	.05068190635	1	1	0	0	0	0	0	0	0	0	1	2087.614	1792.207	1	33.57683	22.1295
153						12	W	255307	257856	biological process unknown	molecular function unknown					YLR057W	YLR057W||ebi.ac.uk:Database:sgd;A_06_P4869||www.chem.agilent.com:Database:agp		A_06_P4869	1082460	OLIGO	9.525000015	.188148148	46	2	1	153			1020	59	1	.05662135718	1	1	0	0	0	0	0	0	0	0	1	846.9313	746.5065	1	17.22656	22.22305
154					RIM13	13	C	568181	565998	protein processing	cysteine-type endopeptidase activity					YMR154C	YMR154C||ebi.ac.uk:Database:sgd;A_06_P5587||www.chem.agilent.com:Database:agp		A_06_P5587	1081933	OLIGO	9.736666682	.188148148	47	2	1	154			1041	58	1	.1365973914	1	1	0	0	0	0	0	0	0	0	1	167.0616	180.9333	1	7.444003	21.92963
155						11	W	491007	493304	biological process unknown	molecular function unknown					YKR027W	YKR027W||ebi.ac.uk:Database:sgd;A_06_P4664||www.chem.agilent.com:Database:agp		A_06_P4664	1080694	OLIGO	9.948333349	.188148148	48	2	1	155			1063	59	1	.07497770366	1	1	0	0	0	0	0	0	0	0	1	427.2883	360.7227	1	9.209157	21.7
156					SRL1	15	W	797676	798308	nucleobase, nucleoside, nucleotide and nucleic acid metabolism	molecular function unknown					YOR247W	YOR247W||ebi.ac.uk:Database:sgd;A_06_P6608||www.chem.agilent.com:Database:agp		A_06_P6608	1084897	OLIGO	10.160000016	.188148148	49	2	1	156			1084	58	1	.05554894533	1	1	0	0	0	0	0	0	0	0	0	3700.78	8278.938	1	43.6946	21.95255
157					RIB1	2	C	159696	158659	riboflavin biosynthesis	cyclohydrolase activity					YBL033C	YBL033C||ebi.ac.uk:Database:sgd;A_06_P1163||www.chem.agilent.com:Database:agp		A_06_P1163	1083460	OLIGO	10.371666683	.188148148	50	2	1	157			1105	59	1	.05552948367	1	1	0	0	0	0	0	0	0	0	0	790.8348	1034.492	1	17.1783	22.23346
158					NUG1	5	W	162722	164284	rRNA processing	GTPase activity					YER006W	YER006W||ebi.ac.uk:Database:sgd;A_06_P2627||www.chem.agilent.com:Database:agp		A_06_P2627	1083897	OLIGO	10.58333335	.188148148	51	2	1	158			1126	58	1	.04975810078	1	1	0	0	0	0	0	0	0	0	1	2854.948	3080.801	1	44.69453	22.06667
159					MOT2	5	W	293048	294811	regulation of transcription from RNA polymerase II promoter*	3'-5'-exoribonuclease activity*					YER068W	YER068W||ebi.ac.uk:Database:sgd;A_06_P2699||www.chem.agilent.com:Database:agp		A_06_P2699	1084068	OLIGO	10.795000017	.188148148	52	2	1	159			1147	59	1	.05381702007	1	1	0	0	0	0	0	0	0	0	1	1004.677	1014.215	1	21.4069	21.79087
160						16	W	931372	932784	biological process unknown	molecular function unknown					YPR196W	YPR196W||ebi.ac.uk:Database:sgd;A_06_P7244||www.chem.agilent.com:Database:agp		A_06_P7244	1086839	OLIGO	11.006666684	.188148148	53	2	1	160			1169	58	1	.244071586	1	1	0	0	0	0	0	0	0	0	1	89.09528	96.39728	1	7.197918	21.93015
161						11	W	506159	506473							YKR032W	YKR032W||ebi.ac.uk:Database:sgd;A_06_P4669||www.chem.agilent.com:Database:agp		A_06_P4669	1081632	OLIGO	11.218333351	.188148148	54	2	1	161			1191	59	1	.6968072187	1	1	0	0	0	0	0	0	0	0	1	34.54484	29.36216	1	6.476695	22.10646
162					ASM4	4	C	300003	298417	mRNA-nucleus export*	structural molecule activity					YDL088C	YDL088C||ebi.ac.uk:Database:sgd;A_06_P1818||www.chem.agilent.com:Database:agp		A_06_P1818	1083551	OLIGO	11.430000018	.188148148	55	2	1	162			1211	58	1	.05200561451	1	1	0	0	0	0	0	0	0	0	1	1441.986	1254.967	1	27.0963	21.72694
163					UGO1	4	C	1401204	1399696	transport*	transporter activity					YDR470C	YDR470C||ebi.ac.uk:Database:sgd;A_06_P2463||www.chem.agilent.com:Database:agp		A_06_P2463	1083964	OLIGO	11.641666685	.188148148	56	2	1	163			1232	59	1	.07390490375	1	1	0	0	0	0	0	0	0	0	1	390.3386	413.1377	1	11.14759	22.07473
164					LRE1	3	W	35865	37616	cell wall organization and biogenesis*	transcription regulator activity*					YCL051W	YCL051W||ebi.ac.uk:Database:sgd;A_06_P1603||www.chem.agilent.com:Database:agp		A_06_P1603	1085024	OLIGO	11.853333352	.188148148	57	2	1	164			1253	58	1	.05249195731	1	1	0	0	0	0	0	0	0	0	1	1281.458	1157.578	1	18.99283	22.27407
165					MNS1	10	W	667559	669208	protein amino acid N-linked glycosylation*	mannosyl-oligosaccharide 1,2-alpha-mannosidase activity					YJR131W	YJR131W||ebi.ac.uk:Database:sgd;A_06_P4374||www.chem.agilent.com:Database:agp		A_06_P4374	1081109	OLIGO	12.065000019	.188148148	58	2	1	165			1274	59	1	.05287756894	1	1	0	0	0	0	0	0	0	0	0	1088.973	1380.796	1	21.12841	21.96727
166					DBP5	15	C	415907	414459	mRNA-nucleus export	RNA helicase activity					YOR046C	YOR046C||ebi.ac.uk:Database:sgd;A_06_P6408||www.chem.agilent.com:Database:agp		A_06_P6408	1084627	OLIGO	12.276666686	.188148148	59	2	1	166			1296	58	1	.04940052474	1	1	0	0	0	0	0	0	0	0	1	5288.526	4862.499	1	77.52652	21.7048
167					CCT7	10	W	207794	209446	protein folding*	unfolded protein binding					YJL111W	YJL111W||ebi.ac.uk:Database:sgd;A_06_P4133||www.chem.agilent.com:Database:agp		A_06_P4133	1084030	OLIGO	12.488333353	.188148148	60	2	1	167			1317	59	1	.04966259123	1	1	0	0	0	0	0	0	0	0	1	5070.461	4272.193	1	68.83405	21.88213
168					LEU9	15	W	523027	524841	leucine biosynthesis	2-isopropylmalate synthase activity					YOR108W	YOR108W||ebi.ac.uk:Database:sgd;A_06_P6470||www.chem.agilent.com:Database:agp		A_06_P6470	1084759	OLIGO	12.70000002	.188148148	61	2	1	168			1337	58	1	.05201094145	1	1	0	0	0	0	0	0	0	0	0	1417.194	1999.4	1	21.47749	22.31502
169					TCM10	4	C	1178165	1176330	protein complex assembly	molecular function unknown					YDR350C	YDR350C||ebi.ac.uk:Database:sgd;A_06_P2341||www.chem.agilent.com:Database:agp		A_06_P2341	1082025	OLIGO	12.911666687	.188148148	62	2	1	169			1359	59	1	.06429885486	1	1	0	0	0	0	0	0	0	0	1	526.3348	542.6861	1	11.16161	22.16541
170					CFT1	4	W	1063346	1067419	mRNA polyadenylylation*	RNA binding					YDR301W	YDR301W||ebi.ac.uk:Database:sgd;A_06_P2290||www.chem.agilent.com:Database:agp		A_06_P2290	1082672	OLIGO	13.123333354	.188148148	63	2	1	170			1380	58	1	.05027371436	1	1	0	0	0	0	0	0	0	0	1	2819.459	2319.4	1	49.46023	22.11765
171					BUD7	15	W	878431	880671	bud site selection	molecular function unknown					YOR299W	YOR299W||ebi.ac.uk:Database:sgd;A_06_P6661||www.chem.agilent.com:Database:agp		A_06_P6661	1086239	OLIGO	13.335000021	.188148148	64	2	1	171			1402	59	1	.05264257837	1	1	0	0	0	0	0	0	0	0	1	1126.843	1271.541	1	17.30664	22.16788
172					SPS2	4	C	1485293	1483785	sporulation (sensu Fungi)*	molecular function unknown					YDR522C	YDR522C||ebi.ac.uk:Database:sgd;A_06_P2515||www.chem.agilent.com:Database:agp		A_06_P2515	1085404	OLIGO	13.546666688	.188148148	65	2	1	172			1423	58	1	.6454479169	1	1	0	0	0	0	0	0	0	0	0	40.0186	29.4013	1	6.014516	22.35036
173						4	W	1523232	1523594	biological process unknown	molecular function unknown					YDR542W	YDR542W||ebi.ac.uk:Database:sgd;A_06_P2536||www.chem.agilent.com:Database:agp		A_06_P2536	1081345	OLIGO	13.758333355	.188148148	66	2	1	173			1444	59	1	.05662832207	1	1	0	0	0	0	0	0	0	0	0	716.9404	1064.172	1	11.72235	21.97719
174					SPC34	11	C	511439	510552	mitotic spindle organization and biogenesis in nucleus*	structural constituent of cytoskeleton					YKR037C	YKR037C||ebi.ac.uk:Database:sgd;A_06_P4675||www.chem.agilent.com:Database:agp		A_06_P4675	1080917	OLIGO	13.970000022	.188148148	67	2	1	174			1465	58	1	.05586597706	1	1	0	0	0	0	0	0	0	0	0	929.6869	779.7848	1	18.64535	21.86466
175					FAA2	5	W	184540	186774	lipid metabolism*	long-chain-fatty-acid-CoA ligase activity					YER015W	YER015W||ebi.ac.uk:Database:sgd;A_06_P2638||www.chem.agilent.com:Database:agp		A_06_P2638	1080729	OLIGO	14.181666689	.188148148	68	2	1	175			1486	59	1	.1010563232	1	1	0	0	0	0	0	0	0	0	1	267.3449	235.7303	1	10.86273	22.08029
176					URE2	14	C	220200	219136	regulation of nitrogen utilization*	transcription corepressor activity					YNL229C	YNL229C||ebi.ac.uk:Database:sgd;A_06_P6001||www.chem.agilent.com:Database:agp		A_06_P6001	1085782	OLIGO	14.393333356	.188148148	69	2	1	176			1507	58	1	.05064153368	1	1	0	0	0	0	0	0	0	0	0	2111.287	2724.34	1	30.69846	21.94139
177					SMD3	12	C	434464	434159	nuclear mRNA splicing, via spliceosome	RNA splicing factor activity, transesterification mechanism*					YLR147C	YLR147C||ebi.ac.uk:Database:sgd;A_06_P4960||www.chem.agilent.com:Database:agp		A_06_P4960	1083319	OLIGO	14.605000023	.188148148	70	2	1	177			1528	59	1	.05998021415	1	1	0	0	0	0	0	0	0	0	1	600.1059	705.8004	1	15.08875	22.11765
178					PMA1	7	C	482671	479915	regulation of pH*	hydrogen-exporting ATPase activity, phosphorylative mechanism					YGL008C	YGL008C||ebi.ac.uk:Database:sgd;A_06_P2963||www.chem.agilent.com:Database:agp		A_06_P2963	1083142	OLIGO	14.81666669	.188148148	71	2	1	178			1549	59	1	.04944950985	1	1	0	0	0	0	0	0	0	0	1	76859.09	91594.12	1	876.8586	22.14286
179					FAR7	6	W	160529	161194	cell cycle arrest in response to pheromone	molecular function unknown					YFR008W	YFR008W||ebi.ac.uk:Database:sgd;A_06_P2902||www.chem.agilent.com:Database:agp		A_06_P2902	1082993	OLIGO	15.028333357	.188148148	72	2	1	179			1571	59	1	.1213296088	1	1	0	0	0	0	0	0	0	0	1	227.3744	175.4873	1	7.357569	22.35878
180					RPS7A	15	W	505794	506767	protein biosynthesis	structural constituent of ribosome					YOR096W	YOR096W||ebi.ac.uk:Database:sgd;A_06_P6458||www.chem.agilent.com:Database:agp		A_06_P6458	1081668	OLIGO	15.240000024	.188148148	73	2	1	180			1592	58	1	.04919333778	1	1	0	0	0	0	0	0	0	0	1	11213.63	11727.71	1	78.4171	21.93841
181						4	C	835487	832854	biological process unknown	molecular function unknown					YDR186C	YDR186C||ebi.ac.uk:Database:sgd;A_06_P2175||www.chem.agilent.com:Database:agp		A_06_P2175	1083411	OLIGO	15.451666691	.188148148	74	2	1	181			1613	59	1	.05187711799	1	1	0	0	0	0	0	0	0	0	1	1365.482	1307.176	1	22.73754	21.94297
182					GRX4	5	C	539163	538429	response to oxidative stress	thiol-disulfide exchange intermediate activity					YER174C	YER174C||ebi.ac.uk:Database:sgd;A_06_P2806||www.chem.agilent.com:Database:agp		A_06_P2806	1085486	OLIGO	15.663333358	.188148148	75	2	1	182			1634	58	1	.0555237044	1	1	0	0	0	0	0	0	0	0	1	817.3812	915.1723	1	13.78744	22.04528
183					RRM3	8	C	172962	170791	mitochondrial genome maintenance*	DNA helicase activity*					YHR031C	YHR031C||ebi.ac.uk:Database:sgd;A_06_P3602||www.chem.agilent.com:Database:agp		A_06_P3602	1083539	OLIGO	15.875000025	.188148148	76	2	1	183			1655	59	1	.07031711339	1	1	0	0	0	0	0	0	0	0	0	500.6849	394.7034	1	12.45121	21.90775
184					ECM21	2	C	28299	24946	cell wall organization and biogenesis	molecular function unknown					YBL101C	YBL101C||ebi.ac.uk:Database:sgd;A_06_P1234||www.chem.agilent.com:Database:agp		A_06_P1234	1083878	OLIGO	16.086666692	.188148148	77	2	1	184			1677	58	1	.05293871656	1	1	0	0	0	0	0	0	0	0	0	1075.446	1342.722	1	23.50932	21.81716
185					MDH1	11	W	278768	279772	tricarboxylic acid cycle*	L-malate dehydrogenase activity					YKL085W	YKL085W||ebi.ac.uk:Database:sgd;A_06_P4495||www.chem.agilent.com:Database:agp		A_06_P4495	1086544	OLIGO	16.298333359	.188148148	78	2	1	185			1698	59	1	.04965546982	1	1	0	0	0	0	0	0	0	0	1	17261.96	21577.93	1	220.9096	21.94834
186						10	W	71365	72573	biological process unknown	molecular function unknown					YJL193W	YJL193W||ebi.ac.uk:Database:sgd;A_06_P4215||www.chem.agilent.com:Database:agp		A_06_P4215	1081155	OLIGO	16.510000026	.188148148	79	2	1	186			1719	58	1	.05655925523	1	1	0	0	0	0	0	0	0	0	1	773.9902	810.6435	1	15.12877	22.02113
187						12	W	958424	962731	biological process unknown	helicase activity					YLR419W	YLR419W||ebi.ac.uk:Database:sgd;A_06_P5237||www.chem.agilent.com:Database:agp		A_06_P5237	1082523	OLIGO	16.721666693	.188148148	80	2	1	187			1740	59	1	.06411768958	1	1	0	0	0	0	0	0	0	0	1	505.8527	577.2716	1	11.11444	22.09848
188					RPS29B	4	C	340798	340628	protein biosynthesis	structural constituent of ribosome					YDL061C	YDL061C||ebi.ac.uk:Database:sgd;A_06_P1790||www.chem.agilent.com:Database:agp		A_06_P1790	1081582	OLIGO	16.93333336	.188148148	81	2	1	188			1761	58	1	.05167104366	1	1	0	0	0	0	0	0	0	0	1	12519.35	20675.7	1	153.266	22.02555
189					SLX8	5	C	396168	395344	DNA recombination	DNA binding					YER116C	YER116C||ebi.ac.uk:Database:sgd;A_06_P2748||www.chem.agilent.com:Database:agp		A_06_P2748	1086059	OLIGO	17.145000027	.188148148	82	2	1	189			1782	59	1	.07817811472	1	1	0	0	0	0	0	0	0	0	1	373.4829	355.769	1	11.02712	22.24715
190					TAN1	7	W	62075	63002	tRNA modification	RNA binding					YGL232W	YGL232W||ebi.ac.uk:Database:sgd;A_06_P3188||www.chem.agilent.com:Database:agp		A_06_P3188	1084288	OLIGO	17.356666694	.188148148	83	2	1	190			1803	58	1	.0552357906	1	1	0	0	0	0	0	0	0	0	0	1208.46	822.7651	1	25.99028	22.20295
191						14	W	498537	498683							YNL067W-A	YNL067W-A||ebi.ac.uk:Database:sgd;A_06_P5838||www.chem.agilent.com:Database:agp		A_06_P5838	1085999	OLIGO	17.568333361	.188148148	84	2	1	191			1825	59	1	.6497377499	1	1	0	0	0	0	0	0	0	0	0	37.02226	31.53636	1	6.289966	22.21818
192					LPE10	16	W	434520	435761	mitochondrial magnesium ion transport	magnesium ion transporter activity					YPL060W	YPL060W||ebi.ac.uk:Database:sgd;A_06_P6819||www.chem.agilent.com:Database:agp		A_06_P6819	1084290	OLIGO	17.780000028	.188148148	85	2	1	192			1845	58	1	.194114849	1	1	0	0	0	0	0	0	0	0	0	162.0816	83.92072	1	7.682906	22.16105
193					BDH1	1	W	35156	36304	butanediol fermentation	(R,R)-butanediol dehydrogenase activity					YAL060W	YAL060W||ebi.ac.uk:Database:sgd;A_06_P1084||www.chem.agilent.com:Database:agp		A_06_P1084	1081570	OLIGO	17.991666695	.188148148	86	2	1	193			1867	59	1	.05055155573	1	1	0	0	0	0	0	0	0	0	1	9940.784	14390.4	1	150.7973	21.82353
194						6	W	156139	157746	biological process unknown	X-Pro aminopeptidase activity					YFR006W	YFR006W||ebi.ac.uk:Database:sgd;A_06_P2900||www.chem.agilent.com:Database:agp		A_06_P2900	1083238	OLIGO	18.203333362	.188148148	87	2	1	194			1888	59	1	.0500492946	1	1	0	0	0	0	0	0	0	0	1	3013.684	3743.635	1	62.63854	22.03409
195					PAC2	5	W	164526	166082	post-chaperonin tubulin folding pathway*	alpha-tubulin binding					YER007W	YER007W||ebi.ac.uk:Database:sgd;A_06_P2629||www.chem.agilent.com:Database:agp		A_06_P2629	1080894	OLIGO	18.415000029	.188148148	88	2	1	195			1909	59	1	.1073489431	1	1	0	0	0	0	0	0	0	0	1	278.7967	194.0804	1	8.832165	21.91697
196					SRB5	7	C	698372	697449	transcription from RNA polymerase II promoter	RNA polymerase II transcription mediator activity					YGR104C	YGR104C||ebi.ac.uk:Database:sgd;A_06_P3324||www.chem.agilent.com:Database:agp		A_06_P3324	1080958	OLIGO	18.626666696	.188148148	89	2	1	196			1930	58	1	.06534493537	1	1	0	0	0	0	0	0	0	0	1	553.0817	482.5974	1	12.59629	21.92308
197					ARR4	4	C	283176	282112	response to heat*	ATPase activity					YDL100C	YDL100C||ebi.ac.uk:Database:sgd;A_06_P1830||www.chem.agilent.com:Database:agp		A_06_P1830	1085772	OLIGO	18.838333363	.188148148	90	2	1	197			1952	60	1	.04937798478	1	1	0	0	0	0	0	0	0	0	1	5012.243	4734.591	1	84.66157	22.0365
198					PMT4	10	C	700529	698241	protein amino acid O-linked glycosylation	dolichyl-phosphate-mannose-protein mannosyltransferase activity					YJR143C	YJR143C||ebi.ac.uk:Database:sgd;A_06_P4387||www.chem.agilent.com:Database:agp		A_06_P4387	1084411	OLIGO	19.05000003	.188148148	91	2	1	198			1973	58	1	.04938015495	1	1	0	0	0	0	0	0	0	0	1	9613.995	11052.26	1	146.8916	22.23735
199					ASF1	10	W	196206	197045	DNA damage response, signal transduction resulting in induction of apoptosis	transcription regulator activity*					YJL115W	YJL115W||ebi.ac.uk:Database:sgd;A_06_P4135||www.chem.agilent.com:Database:agp		A_06_P4135	1085699	OLIGO	19.261666697	.188148148	92	2	1	199			1994	59	1	.1139841036	1	1	0	0	0	0	0	0	0	0	1	201.3553	230.6143	1	6.903257	21.88213
200						8	C	367894	365342	biological process unknown	molecular function unknown					YHR131C	YHR131C||ebi.ac.uk:Database:sgd;A_06_P3706||www.chem.agilent.com:Database:agp		A_06_P3706	1081367	OLIGO	19.473333364	.188148148	93	2	1	200			2015	58	1	.0615893375	1	1	0	0	0	0	0	0	0	0	1	632.508	567.3619	1	13.49381	22.54297
201					RER2	2	C	242570	241710	ER to Golgi transport*	prenyltransferase activity*					YBR002C	YBR002C||ebi.ac.uk:Database:sgd;A_06_P1249||www.chem.agilent.com:Database:agp		A_06_P1249	1086603	OLIGO	19.685000031	.188148148	94	2	1	201			2036	59	1	.07419135442	1	1	0	0	0	0	0	0	0	0	1	421.2789	378.3022	1	13.16751	22.30072
202					BUD20	12	C	282457	281957	bud site selection	molecular function unknown					YLR074C	YLR074C||ebi.ac.uk:Database:sgd;A_06_P4886||www.chem.agilent.com:Database:agp		A_06_P4886	1085585	OLIGO	19.896666698	.188148148	95	2	1	202			2057	58	1	.05133553318	1	1	0	0	0	0	0	0	0	0	1	1488.287	1817.249	1	30.00463	21.85714
203					CTF18	13	C	424727	422502	mitotic sister chromatid cohesion	molecular function unknown					YMR078C	YMR078C||ebi.ac.uk:Database:sgd;A_06_P5506||www.chem.agilent.com:Database:agp		A_06_P5506	1085285	OLIGO	20.108333365	.188148148	96	2	1	203			2079	59	1	.08376400489	1	1	0	0	0	0	0	0	0	0	1	337.5205	316.3349	1	10.51174	22.38433
204						15	C	65349	61324	biological process unknown	molecular function unknown					YOL138C	YOL138C||ebi.ac.uk:Database:sgd;A_06_P6331||www.chem.agilent.com:Database:agp		A_06_P6331	1083612	OLIGO	20.320000032	.188148148	97	2	1	204			2100	58	1	.05972810302	1	1	0	0	0	0	0	0	0	0	1	621.326	691.667	1	13.11082	22.45221
205						13	C	923800	923492							YMR326C	YMR326C||ebi.ac.uk:Database:sgd;A_06_P5771||www.chem.agilent.com:Database:agp		A_06_P5771	1084800	OLIGO	20.531666699	.188148148	98	2	1	205			2121	59	1	.697779012	1	1	0	0	0	0	0	0	0	0	1	35.03293	28.84549	1	6.940177	22.38267
206					BLM3	6	W	123474	129905	protein catabolism*	proteasome activator activity					YFL007W	YFL007W||ebi.ac.uk:Database:sgd;A_06_P2830||www.chem.agilent.com:Database:agp		A_06_P2830	1082027	OLIGO	20.743333366	.188148148	99	2	1	206			2142	58	1	.08942180106	1	1	0	0	0	0	0	0	0	0	1	285.0277	308.8561	1	10.48959	22.01901
207					ADH6	13	C	912141	911059	aldehyde metabolism*	alcohol dehydrogenase (NADP+) activity					YMR318C	YMR318C||ebi.ac.uk:Database:sgd;A_06_P5763||www.chem.agilent.com:Database:agp		A_06_P5763	1082463	OLIGO	20.955000033	.188148148	100	2	1	207			2164	60	1	.05037028655	1	1	0	0	0	0	0	0	0	0	1	4276.689	5894.182	1	48.69252	22.53558
208					PHO87	3	C	197180	194409	phosphate transport	inorganic phosphate transporter activity					YCR037C	YCR037C||ebi.ac.uk:Database:sgd;A_06_P1662||www.chem.agilent.com:Database:agp		A_06_P1662	1083332	OLIGO	21.1666667	.188148148	101	2	1	208			2184	58	1	.05129307216	1	1	0	0	0	0	0	0	0	0	1	1468.628	1584.193	1	32.71785	22.5
209					NDL1	12	C	644975	644406	nuclear migration, microtubule-mediated	molecular function unknown					YLR254C	YLR254C||ebi.ac.uk:Database:sgd;A_06_P5068||www.chem.agilent.com:Database:agp		A_06_P5068	1081347	OLIGO	21.378333367	.188148148	102	2	1	209			2205	59	1	.07073034885	1	1	0	0	0	0	0	0	0	0	0	540.2299	368.0047	1	14.619	22.41455
210					MCH4	15	C	96360	94855	transport	transporter activity*					YOL119C	YOL119C||ebi.ac.uk:Database:sgd;A_06_P6312||www.chem.agilent.com:Database:agp		A_06_P6312	1086646	OLIGO	21.590000034	.188148148	103	2	1	210			2227	58	1	.05529333824	1	1	0	0	0	0	0	0	0	0	0	942.3122	1687.942	1	17.63058	22.06391
211					LSM2	2	W	170626	171041	nuclear mRNA splicing, via spliceosome*	RNA binding					YBL026W	YBL026W||ebi.ac.uk:Database:sgd;A_06_P1155||www.chem.agilent.com:Database:agp		A_06_P1155	1084305	OLIGO	21.801666701	.188148148	104	2	1	211			2248	60	1	.06744356405	1	1	0	0	0	0	0	0	0	0	1	469.2218	490.7357	1	12.54293	22.09926
212																	(-)3xSLv1||AgilentControlDB;NegativeControl||AgilentControlDB		(-)3XSLV1	1080867	CONTROL	22.013333368	.188148148	105	2	1	212			2269	59	1	.513613202	1	1	0	0	0	0	0	0	0	0	0	58.66724	31.01059	1	6.202339	22.34221
213																	(-)3xSLv1||AgilentControlDB;NegativeControl||AgilentControlDB		(-)3XSLV1	1080867	CONTROL	22.225000035	.188148148	106	2	1	213			2290	60	1	.4355740902	1	1	0	0	0	1	0	0	0	0	0	81.19678	29.8938	1	6.560988	22.18727
214																	(-)3xSLv1||AgilentControlDB;NegativeControl||AgilentControlDB		(-)3XSLV1	1080867	CONTROL	22.436666702	.188148148	107	2	1	214			2312	59	1	.465618952	1	1	0	0	0	1	0	0	0	0	0	76.48068	27.6281	1	5.640485	21.63121
215						13	W	325876	327288	biological process unknown	molecular function unknown					YMR027W	YMR027W||ebi.ac.uk:Database:sgd;A_06_P5455||www.chem.agilent.com:Database:agp		A_06_P5455	1081217	OLIGO	0	.376296296	1	3	1	215			68	77	1	.05148633664	1	1	0	0	0	0	0	0	0	0	1	8535.103	5316.06	1	161.0663	21.24354
216					PRM9	1	W	186830	187726	vesicle organization and biogenesis	molecular function unknown					YAR031W	YAR031W||ebi.ac.uk:Database:sgd;A_06_P1111||www.chem.agilent.com:Database:agp		A_06_P1111	1081485	OLIGO	.211666667	.376296296	2	3	1	216			89	78	1	.6639800294	1	1	0	0	0	0	0	0	0	0	0	31.36481	35.66281	1	5.388269	21.94776
217						2	W	513038	513577	biological process unknown	molecular function unknown					YBR137W	YBR137W||ebi.ac.uk:Database:sgd;A_06_P1389||www.chem.agilent.com:Database:agp		A_06_P1389	1086645	OLIGO	.423333334	.376296296	3	3	1	217			110	77	1	.05679214886	1	1	0	0	0	0	0	0	0	0	1	784.6716	771.8416	1	21.07787	21.76136
218					RPS22A	10	C	75301	74909	protein biosynthesis	structural constituent of ribosome					YJL190C	YJL190C||ebi.ac.uk:Database:sgd;A_06_P4212||www.chem.agilent.com:Database:agp		A_06_P4212	1082954	OLIGO	.635000001	.376296296	4	3	1	218			131	78	1	.04970476982	1	1	0	0	0	0	0	0	0	0	1	30870.84	39077.32	1	399.5263	21.48327
219					CEP3	13	C	599157	597331	mitotic spindle checkpoint	DNA bending activity*					YMR168C	YMR168C||ebi.ac.uk:Database:sgd;A_06_P5603||www.chem.agilent.com:Database:agp		A_06_P5603	1085607	OLIGO	.846666668	.376296296	5	3	1	219			152	77	1	.1786565431	1	1	0	0	0	0	0	0	0	0	1	134.4892	123.7222	1	7.686943	22.37546
220					TRL1	10	C	272401	269918	tRNA splicing*	RNA ligase (ATP) activity					YJL087C	YJL087C||ebi.ac.uk:Database:sgd;A_06_P4109||www.chem.agilent.com:Database:agp		A_06_P4109	1085564	OLIGO	1.058333335	.376296296	6	3	1	220			174	77	1	.08040526151	1	1	0	0	0	0	0	0	0	0	0	436.7327	286.2143	1	11.6379	21.66148
221						16	C	828136	826829	biological process unknown	molecular function unknown					YPR148C	YPR148C||ebi.ac.uk:Database:sgd;A_06_P7196||www.chem.agilent.com:Database:agp		A_06_P7196	1082544	OLIGO	1.270000002	.376296296	7	3	1	221			195	77	1	.04977945747	1	1	0	0	0	0	0	0	0	0	1	2832.259	2753.569	1	44.66285	21.42471
222					SNO1	13	C	457958	457284	pyridoxine metabolism*	molecular function unknown					YMR095C	YMR095C||ebi.ac.uk:Database:sgd;A_06_P5524||www.chem.agilent.com:Database:agp		A_06_P5524	1082483	OLIGO	1.481666669	.376296296	8	3	1	222			216	78	1	.2829518248	1	1	0	0	0	0	0	0	0	0	0	37.54693	148.0158	1	5.452483	21.72101
223						15	C	968469	968143							YOR343C	YOR343C||ebi.ac.uk:Database:sgd;A_06_P6707||www.chem.agilent.com:Database:agp		A_06_P6707	1083407	OLIGO	1.693333336	.376296296	9	3	1	223			237	77	1	.08493015669	1	1	0	0	0	0	0	0	0	0	0	255.1612	413.6289	1	8.467578	21.75714
224					MMS1	16	W	870699	874922	DNA repair*	molecular function unknown					YPR164W	YPR164W||ebi.ac.uk:Database:sgd;A_06_P7212||www.chem.agilent.com:Database:agp		A_06_P7212	1086074	OLIGO	1.905000003	.376296296	10	3	1	224			259	78	1	.06217937183	1	1	0	0	0	0	0	0	0	0	1	571.3236	592.4487	1	13.7538	21.49808
225					TAF12	4	W	746733	748352	transcription initiation from RNA polymerase II promoter*	general RNA polymerase II transcription factor activity					YDR145W	YDR145W||ebi.ac.uk:Database:sgd;A_06_P2133||www.chem.agilent.com:Database:agp		A_06_P2133	1082184	OLIGO	2.11666667	.376296296	11	3	1	225			279	77	1	.0577791728	1	1	0	0	0	0	0	1	0	0	0	801.6011	681.099	1	15.26734	21.69742
226					KTI12	11	C	229526	228585	carbon utilization	enzyme regulator activity					YKL110C	YKL110C||ebi.ac.uk:Database:sgd;A_06_P4522||www.chem.agilent.com:Database:agp		A_06_P4522	1084633	OLIGO	2.328333337	.376296296	12	3	1	226			300	77	1	.07197840491	1	1	0	0	0	0	0	0	0	0	1	411.7339	431.3757	1	9.758735	21.59854
227																	(+)E1A_r60_a104||AgilentControlDB;E1A_r60_a104||AgilentControlDB		(+)E1A_R60_A104	1545260	CONTROL	2.540000004	.376296296	13	3	1	227			322	76	1	.6880012591	1	1	0	0	0	0	0	0	0	0	0	36.5534	28.38057	1	5.530968	21.88686
228					CAF4	11	C	510323	508344	regulation of transcription, DNA-dependent	protein binding					YKR036C	YKR036C||ebi.ac.uk:Database:sgd;A_06_P4674||www.chem.agilent.com:Database:agp		A_06_P4674	1082707	OLIGO	2.751666671	.376296296	14	3	1	228			343	78	1	.06906495938	1	1	0	0	0	0	0	0	0	0	1	436.8637	478.5571	1	11.80179	21.97426
229					TPN1	7	C	152782	151043	vitamin transport	vitamin transporter activity					YGL186C	YGL186C||ebi.ac.uk:Database:sgd;A_06_P3141||www.chem.agilent.com:Database:agp		A_06_P3141	1085456	OLIGO	2.963333338	.376296296	15	3	1	229			364	77	1	.04923574443	1	1	0	0	0	0	0	0	0	0	1	9576.864	10271.95	1	138.5154	22.10487
230					COX6	8	W	209698	210144	aerobic respiration*	cytochrome-c oxidase activity					YHR051W	YHR051W||ebi.ac.uk:Database:sgd;A_06_P3624||www.chem.agilent.com:Database:agp		A_06_P3624	1086825	OLIGO	3.175000005	.376296296	16	3	1	230			385	78	1	.0497736473	1	1	0	0	0	0	0	0	0	0	1	3183.355	3682.82	1	48.49498	22.09559
231					VMA7	7	C	527333	526977	vacuolar acidification	hydrogen-transporting ATPase activity, rotational mechanism					YGR020C	YGR020C||ebi.ac.uk:Database:sgd;A_06_P3240||www.chem.agilent.com:Database:agp		A_06_P3240	1085775	OLIGO	3.386666672	.376296296	17	3	1	231			407	77	1	.0543948887	1	1	0	0	0	0	0	0	0	0	0	891.0698	1091.967	1	19.31373	21.94118
232					QCR6	6	C	224757	224314	aerobic respiration*	ubiquinol-cytochrome-c reductase activity					YFR033C	YFR033C||ebi.ac.uk:Database:sgd;A_06_P2931||www.chem.agilent.com:Database:agp		A_06_P2931	1083147	OLIGO	3.598333339	.376296296	18	3	1	232			428	78	1	.04943440855	1	1	0	0	0	0	0	0	0	0	1	17072.03	14468.59	1	187.1367	21.71269
233					MIA40	11	W	75826	77037	protein targeting*	molecular function unknown					YKL195W	YKL195W||ebi.ac.uk:Database:sgd;A_06_P4608||www.chem.agilent.com:Database:agp		A_06_P4608	1080881	OLIGO	3.810000006	.376296296	19	3	1	233			449	76	1	.05103522209	1	1	0	0	0	0	0	0	0	0	1	1902.761	1602.426	1	31.95119	22.02909
234					ISA2	16	W	682217	682774	iron ion transport	molecular function unknown					YPR067W	YPR067W||ebi.ac.uk:Database:sgd;A_06_P7113||www.chem.agilent.com:Database:agp		A_06_P7113	1085376	OLIGO	4.021666673	.376296296	20	3	1	234			470	78	1	.06035555454	1	1	0	0	0	0	0	0	0	0	1	584.9501	700.0109	1	13.58212	21.83459
235					NUP84	4	W	251566	253746	mRNA-nucleus export*	structural molecule activity					YDL116W	YDL116W||ebi.ac.uk:Database:sgd;A_06_P1847||www.chem.agilent.com:Database:agp		A_06_P1847	1086726	OLIGO	4.23333334	.376296296	21	3	1	235			491	77	1	.05584630074	1	1	0	0	0	0	0	0	0	0	1	911.6444	787.345	1	18.63978	21.96629
236					RTT101	10	C	352024	349496	ubiquitin-dependent protein catabolism*	protein binding*					YJL047C	YJL047C||ebi.ac.uk:Database:sgd;A_06_P4067||www.chem.agilent.com:Database:agp		A_06_P4067	1081999	OLIGO	4.445000007	.376296296	22	3	1	236			512	78	1	.0598361889	1	1	0	0	0	0	0	0	0	0	0	713.9668	603.2316	1	11.36851	22.02273
237						2	C	206952	206110	biological process unknown	molecular function unknown					YBL010C	YBL010C||ebi.ac.uk:Database:sgd;A_06_P1139||www.chem.agilent.com:Database:agp		A_06_P1139	1081860	OLIGO	4.656666674	.376296296	23	3	1	237			533	77	1	.07227977274	1	1	0	0	0	0	0	0	0	0	0	585.0193	329.6224	1	13.17943	21.55769
238						5	W	566225	566650	biological process unknown	molecular function unknown					YER187W	YER187W||ebi.ac.uk:Database:sgd;A_06_P2819||www.chem.agilent.com:Database:agp		A_06_P2819	1083305	OLIGO	4.868333341	.376296296	24	3	1	238			555	78	1	.2140215806	1	1	0	0	0	0	0	0	0	0	1	116.9974	96.521	1	7.604457	21.49091
239					SPO74	7	C	185400	184159	sporulation (sensu Fungi)	structural molecule activity					YGL170C	YGL170C||ebi.ac.uk:Database:sgd;A_06_P3125||www.chem.agilent.com:Database:agp		A_06_P3125	1084393	OLIGO	5.080000008	.376296296	25	3	1	239			576	76	1	.709079419	1	1	0	0	0	0	0	0	0	0	0	27.77416	35.17652	1	4.281249	21.47692
241						2	C	259564	259145							YBR012C	YBR012C||ebi.ac.uk:Database:sgd;A_06_P1259||www.chem.agilent.com:Database:agp		A_06_P1259	1084609	OLIGO	5.503333342	.376296296	27	3	1	241			618	77	1	.1771634987	1	1	0	0	0	0	0	0	0	0	1	126.1937	134.2938	1	6.656897	21.71053
242					LIP2	12	C	617320	616334	protein-lipoylation	ligase activity					YLR239C	YLR239C||ebi.ac.uk:Database:sgd;A_06_P5053||www.chem.agilent.com:Database:agp		A_06_P5053	1086291	OLIGO	5.715000009	.376296296	28	3	1	242			640	78	1	.05753268876	1	1	0	0	0	0	0	0	0	0	1	709.4716	780.0238	1	19.11641	21.68321
243					PIM1	2	C	181278	177877	proteolysis and peptidolysis*	ATP-dependent peptidase activity					YBL022C	YBL022C||ebi.ac.uk:Database:sgd;A_06_P1151||www.chem.agilent.com:Database:agp		A_06_P1151	1082290	OLIGO	5.926666676	.376296296	29	3	1	243			660	77	1	.04966126468	1	1	0	0	0	0	0	0	0	0	1	7077.101	5796.732	1	107.9313	21.58974
244					CDC8	10	W	543976	544626	DNA repair*	thymidylate kinase activity*					YJR057W	YJR057W||ebi.ac.uk:Database:sgd;A_06_P4300||www.chem.agilent.com:Database:agp		A_06_P4300	1085579	OLIGO	6.138333343	.376296296	30	3	1	244			682	78	1	.0619129841	1	1	0	0	0	0	0	0	0	0	1	555.3269	629.3945	1	11.77537	21.62868
245						4	W	501096	501410							YDR029W	YDR029W||ebi.ac.uk:Database:sgd;A_06_P2014||www.chem.agilent.com:Database:agp		A_06_P2014	1081137	OLIGO	6.35000001	.376296296	31	3	1	245			703	77	1	.1726232496	1	1	0	0	0	0	0	0	0	0	1	149.6949	119.5163	1	7.236789	21.5916
246					BAT2	10	W	705659	706789	branched chain family amino acid biosynthesis*	branched-chain-amino-acid transaminase activity					YJR148W	YJR148W||ebi.ac.uk:Database:sgd;A_06_P4392||www.chem.agilent.com:Database:agp		A_06_P4392	1086762	OLIGO	6.561666677	.376296296	32	3	1	246			724	78	1	.05519039231	1	1	0	0	0	0	0	0	0	0	0	1658.347	3467.262	1	23.94721	21.83764
247					BUR6	5	C	491953	491525	negative regulation of transcription from RNA polymerase II promoter	transcription corepressor activity					YER159C	YER159C||ebi.ac.uk:Database:sgd;A_06_P2792||www.chem.agilent.com:Database:agp		A_06_P2792	1086894	OLIGO	6.773333344	.376296296	33	3	1	247			745	77	1	.04995788069	1	1	0	0	0	0	0	0	0	0	1	3086.072	2662.718	1	52.22299	21.97398
248					SSH1	2	C	770411	768939	cotranslational protein-membrane targeting	protein transporter activity					YBR283C	YBR283C||ebi.ac.uk:Database:sgd;A_06_P1537||www.chem.agilent.com:Database:agp		A_06_P1537	1084124	OLIGO	6.985000011	.376296296	34	3	1	248			766	78	1	.04946359335	1	1	0	0	0	0	0	0	0	0	1	11445.94	13574.23	1	135.8846	22.22263
249						5	C	473983	472652	biological process unknown	molecular function unknown					YER152C	YER152C||ebi.ac.uk:Database:sgd;A_06_P2785||www.chem.agilent.com:Database:agp		A_06_P2785	1080883	OLIGO	7.196666678	.376296296	35	3	1	249			787	77	1	.04948621864	1	1	0	0	0	0	0	0	0	0	1	5163.408	5915.484	1	85.6251	22.58955
250					PRE5	13	W	901708	902412	ubiquitin-dependent protein catabolism	endopeptidase activity					YMR314W	YMR314W||ebi.ac.uk:Database:sgd;A_06_P5757||www.chem.agilent.com:Database:agp		A_06_P5757	1084508	OLIGO	7.408333345	.376296296	36	3	1	250			809	77	1	.04941847352	1	1	0	0	0	0	0	0	0	0	1	6469.081	5731.877	1	91.72696	22.17603
251					RNH70	7	C	1045486	1043825	DNA replication*	3'-5' exonuclease activity					YGR276C	YGR276C||ebi.ac.uk:Database:sgd;A_06_P3498||www.chem.agilent.com:Database:agp		A_06_P3498	1086181	OLIGO	7.620000012	.376296296	37	3	1	251			830	77	1	.05867698049	1	1	0	0	0	0	0	0	0	0	1	730.3047	659.7497	1	15.40845	22.21091
252					TOR2	11	C	63360	55936	endocytosis*	protein binding*					YKL203C	YKL203C||ebi.ac.uk:Database:sgd;A_06_P4615||www.chem.agilent.com:Database:agp		A_06_P4615	1086401	OLIGO	7.831666679	.376296296	38	3	1	252			851	78	1	.05031665752	1	1	0	0	0	0	0	0	0	0	1	2587.331	2174.181	1	41.2615	22.40511
253																	(+)E1A_r60_a104||AgilentControlDB;E1A_r60_a104||AgilentControlDB		(+)E1A_R60_A104	1545260	CONTROL	8.043333346	.376296296	39	3	1	253			873	77	1	.6876101339	1	1	0	0	0	0	0	0	0	0	0	36.28441	28.64251	1	5.824416	22.28519
254						7	C	695139	694588	biological process unknown	molecular function unknown					YGR102C	YGR102C||ebi.ac.uk:Database:sgd;A_06_P3322||www.chem.agilent.com:Database:agp		A_06_P3322	1082272	OLIGO	8.255000013	.376296296	40	3	1	254			894	78	1	.05061724267	1	1	0	0	0	0	0	0	0	0	1	2103.737	1825.654	1	36.04711	22.23019
255						14	C	678488	677199	biological process unknown	molecular function unknown					YNR029C	YNR029C||ebi.ac.uk:Database:sgd;A_06_P6140||www.chem.agilent.com:Database:agp		A_06_P6140	1084225	OLIGO	8.46666668	.376296296	41	3	1	255			914	77	1	.05262236821	1	1	0	0	0	0	0	0	0	0	1	1220.777	1146.115	1	21.93945	22.20974
256					MPS3	10	W	402813	404861	mitotic sister chromatid cohesion*	molecular function unknown					YJL019W	YJL019W||ebi.ac.uk:Database:sgd;A_06_P4041||www.chem.agilent.com:Database:agp		A_06_P4041	1082615	OLIGO	8.678333347	.376296296	42	3	1	256			935	77	1	.08597662291	1	1	0	0	0	0	0	0	0	0	1	322.0553	306.4277	1	11.56208	21.65799
257					GPX2	2	W	707523	708011	response to oxidative stress	glutathione peroxidase activity					YBR244W	YBR244W||ebi.ac.uk:Database:sgd;A_06_P1498||www.chem.agilent.com:Database:agp		A_06_P1498	1080981	OLIGO	8.890000014	.376296296	43	3	1	257			957	77	1	.07045966432	1	1	0	0	0	0	0	0	0	0	0	504.2575	389.9446	1	9.476678	22.05597
258					BAG7	15	W	578564	579793	small GTPase mediated signal transduction	signal transducer activity*					YOR134W	YOR134W||ebi.ac.uk:Database:sgd;A_06_P6496||www.chem.agilent.com:Database:agp		A_06_P6496	1086190	OLIGO	9.101666681	.376296296	44	3	1	258			977	78	1	.6321525111	1	1	0	0	0	0	0	0	0	0	1	34.59739	35.73319	1	5.907082	22.42105
259						11	C	482782	481814	nuclear mRNA splicing, via spliceosome	molecular function unknown					YKR022C	YKR022C||ebi.ac.uk:Database:sgd;A_06_P4659||www.chem.agilent.com:Database:agp		A_06_P4659	1084671	OLIGO	9.313333348	.376296296	45	3	1	259			999	77	1	.08319765735	1	1	0	0	0	0	0	0	0	0	0	462.9067	249.3664	1	11.92628	22.213
260					FET3	13	W	388821	390731	high affinity iron ion transport*	ferroxidase activity					YMR058W	YMR058W||ebi.ac.uk:Database:sgd;A_06_P5485||www.chem.agilent.com:Database:agp		A_06_P5485	1086254	OLIGO	9.525000015	.376296296	46	3	1	260			1020	78	1	.05322027245	1	1	0	0	0	0	0	0	0	0	1	29321.18	15420.13	1	382.9126	22.4
261					CDC21	15	C	467590	466676	DNA-dependent DNA replication*	thymidylate synthase activity					YOR074C	YOR074C||ebi.ac.uk:Database:sgd;A_06_P6436||www.chem.agilent.com:Database:agp		A_06_P6436	1086366	OLIGO	9.736666682	.376296296	47	3	1	261			1041	77	1	.05143744557	1	1	0	0	0	0	0	0	0	0	1	1640.331	1419.492	1	25.97229	22.19772
262					PNO1	15	C	606171	605347	rRNA processing*	unfolded protein binding					YOR145C	YOR145C||ebi.ac.uk:Database:sgd;A_06_P6507||www.chem.agilent.com:Database:agp		A_06_P6507	1080909	OLIGO	9.948333349	.376296296	48	3	1	262			1063	78	1	.04979059804	1	1	0	0	0	0	0	0	0	0	1	3082.148	2814.514	1	49.0552	22.00373
263					PRO2	15	C	922900	921530	proline biosynthesis	glutamate-5-semialdehyde dehydrogenase activity					YOR323C	YOR323C||ebi.ac.uk:Database:sgd;A_06_P6687||www.chem.agilent.com:Database:agp		A_06_P6687	1086042	OLIGO	10.160000016	.376296296	49	3	1	263			1084	77	1	.04999791213	1	1	0	0	0	0	0	0	0	0	1	7572.938	10023.67	1	90.65339	22.08209
264						4	C	1511449	1510844							YDR537C	YDR537C||ebi.ac.uk:Database:sgd;A_06_P2531||www.chem.agilent.com:Database:agp		A_06_P2531	1084760	OLIGO	10.371666683	.376296296	50	3	1	264			1105	77	1	.6844746101	0	0	0	0	0	0	0	0	0	0	0	31.61459	33.32023	1	4.500015	22.06084
265						2	C	62599	61199	biological process unknown	molecular function unknown					YBL086C	YBL086C||ebi.ac.uk:Database:sgd;A_06_P1218||www.chem.agilent.com:Database:agp		A_06_P1218	1081568	OLIGO	10.58333335	.376296296	51	3	1	265			1126	77	1	.07833744718	1	1	0	0	0	0	0	0	0	0	1	397.9015	333.5013	1	9.431857	21.43173
266																	(+)E1A_r60_1||AgilentControlDB;E1A_r60_1||AgilentControlDB		(+)E1A_R60_1	1545263	CONTROL	10.795000017	.376296296	52	3	1	266			1147	78	1	.295747639	1	1	0	0	0	0	0	0	0	0	0	58.27983	97.24033	1	5.987364	21.53903
267						4	C	1092506	1090428	biological process unknown	molecular function unknown					YDR314C	YDR314C||ebi.ac.uk:Database:sgd;A_06_P2303||www.chem.agilent.com:Database:agp		A_06_P2303	1081594	OLIGO	11.006666684	.376296296	53	3	1	267			1169	77	1	.195500389	1	1	0	0	0	0	0	0	0	0	1	114.3823	119.893	1	6.550101	22.11913
268					PNT1	15	W	821020	822291	inner mitochondrial membrane organization and biogenesis	molecular function unknown					YOR266W	YOR266W||ebi.ac.uk:Database:sgd;A_06_P6627||www.chem.agilent.com:Database:agp		A_06_P6627	1085779	OLIGO	11.218333351	.376296296	54	3	1	268			1189	78	1	.1183138159	1	1	0	0	0	0	0	0	0	0	1	252.517	168.0097	1	8.773625	22.19691
269					CAF17	10	W	649691	651184	biological process unknown	molecular function unknown					YJR122W	YJR122W||ebi.ac.uk:Database:sgd;A_06_P4365||www.chem.agilent.com:Database:agp		A_06_P4365	1082473	OLIGO	11.430000018	.376296296	55	3	1	269			1211	77	1	.07751890793	1	1	0	0	0	0	0	0	0	0	1	388.6993	352.1213	1	9.671204	21.99267
270					RIO2	14	W	255352	256629	processing of 20S pre-rRNA	protein kinase activity*					YNL207W	YNL207W||ebi.ac.uk:Database:sgd;A_06_P5979||www.chem.agilent.com:Database:agp		A_06_P5979	1084423	OLIGO	11.641666685	.376296296	56	3	1	270			1232	78	1	.05320899923	1	1	0	0	0	0	0	0	0	0	1	1036.819	1185.857	1	19.81685	22.03019
271					RPS14B	10	W	73786	74610	protein biosynthesis*	structural constituent of ribosome*					YJL191W	YJL191W||ebi.ac.uk:Database:sgd;A_06_P4213||www.chem.agilent.com:Database:agp		A_06_P4213	1084047	OLIGO	11.853333352	.376296296	57	3	1	271			1253	77	1	.05191733828	1	1	0	0	0	0	0	0	0	0	0	1826.854	2810.475	1	28.4985	22.09091
272						11	C	193071	191680	biological process unknown	molecular function unknown					YKL133C	YKL133C||ebi.ac.uk:Database:sgd;A_06_P4545||www.chem.agilent.com:Database:agp		A_06_P4545	1083975	OLIGO	12.065000019	.376296296	58	3	1	272			1274	78	1	.07193018952	1	1	0	0	0	0	0	0	0	0	0	497.1224	367.4892	1	13.46672	22.26772
273					RAX1	15	W	880961	882268	bud site selection	molecular function unknown					YOR301W	YOR301W||ebi.ac.uk:Database:sgd;A_06_P6663||www.chem.agilent.com:Database:agp		A_06_P6663	1083501	OLIGO	12.276666686	.376296296	59	3	1	273			1296	77	1	.06826068148	1	1	0	0	0	0	0	0	0	0	0	413.4686	544.0602	1	12.18814	22.04727
274					OPI3	10	C	572849	572229	phosphatidylcholine biosynthesis	phosphatidyl-N-methylethanolamine N-methyltransferase activity					YJR073C	YJR073C||ebi.ac.uk:Database:sgd;A_06_P4316||www.chem.agilent.com:Database:agp		A_06_P4316	1086886	OLIGO	12.488333353	.376296296	60	3	1	274			1317	78	1	.04953615612	1	1	0	0	0	0	0	0	0	0	1	49708.8	40789.05	1	578.0196	22.16045
275					NIC96	6	W	150011	152530	mRNA-nucleus export*	structural molecule activity					YFR002W	YFR002W||ebi.ac.uk:Database:sgd;A_06_P2896||www.chem.agilent.com:Database:agp		A_06_P2896	1085672	OLIGO	12.70000002	.376296296	61	3	1	275			1337	77	1	.05262364236	1	1	0	0	0	0	0	0	0	0	1	1175.474	1176.798	1	21.68785	22.03957
276					SPC105	7	W	334889	337642	microtubule nucleation	structural constituent of cytoskeleton					YGL093W	YGL093W||ebi.ac.uk:Database:sgd;A_06_P3048||www.chem.agilent.com:Database:agp		A_06_P3048	1084733	OLIGO	12.911666687	.376296296	62	3	1	276			1359	78	1	.05254657054	1	1	0	0	0	0	0	0	0	0	0	1774.275	1244.317	1	24.54216	22.02622
277					SAM2	4	C	1454454	1453300	methionine metabolism	methionine adenosyltransferase activity					YDR502C	YDR502C||ebi.ac.uk:Database:sgd;A_06_P2495||www.chem.agilent.com:Database:agp		A_06_P2495	1081183	OLIGO	13.123333354	.376296296	63	3	1	277			1380	77	1	.04981042034	1	1	0	0	0	0	0	0	0	0	1	16160.78	12548.08	1	196.567	22.40364
278						16	W	280479	280925	biological process unknown	molecular function unknown					YPL144W	YPL144W||ebi.ac.uk:Database:sgd;A_06_P6903||www.chem.agilent.com:Database:agp		A_06_P6903	1086576	OLIGO	13.335000021	.376296296	64	3	1	278			1401	78	1	.05647881556	1	1	0	0	0	0	0	0	0	0	1	847.2417	758.5774	1	14.63845	22.35581
279																	E1A_r60_n11||AgilentControlDB;(+)E1A_r60_n11||AgilentControlDB		(+)E1A_R60_N11	1545266	CONTROL	13.546666688	.376296296	65	3	1	279			1423	77	1	.07303137346	1	1	0	0	0	0	0	0	0	0	0	295.5032	861.3288	1	8.712253	22.34351
280						15	C	587342	586950							YOR139C	YOR139C||ebi.ac.uk:Database:sgd;A_06_P6501||www.chem.agilent.com:Database:agp		A_06_P6501	1086312	OLIGO	13.758333355	.376296296	66	3	1	280			1444	78	1	.1639089686	1	1	0	0	0	0	0	0	0	0	1	124.9398	160.3295	1	6.772789	22.05948
281						12	C	1060884	1059754	biological process unknown	molecular function unknown					YLR460C	YLR460C||ebi.ac.uk:Database:sgd;A_06_P5279||www.chem.agilent.com:Database:agp		A_06_P5279	1080727	OLIGO	13.970000022	.376296296	67	3	1	281			1465	77	1	.2173262264	1	1	0	0	0	0	0	0	0	0	1	115.6137	94.54702	1	6.856651	21.76952
282					MCM3	5	W	86937	89852	DNA replication initiation*	chromatin binding*					YEL032W	YEL032W||ebi.ac.uk:Database:sgd;A_06_P2573||www.chem.agilent.com:Database:agp		A_06_P2573	1086249	OLIGO	14.181666689	.376296296	68	3	1	282			1486	78	1	.04961329583	1	1	0	0	0	0	0	0	0	0	1	3438.213	3247.446	1	50.32886	21.80827
283					SCJ1	13	W	695349	696482	protein folding*	chaperone binding					YMR214W	YMR214W||ebi.ac.uk:Database:sgd;A_06_P5653||www.chem.agilent.com:Database:agp		A_06_P5653	1085638	OLIGO	14.393333356	.376296296	69	3	1	283			1507	77	1	.04954200027	1	1	0	0	0	0	0	0	0	0	1	3583.258	3827.97	1	49.87742	21.74818
284					OSH6	11	W	445024	446370	steroid biosynthesis	oxysterol binding					YKR003W	YKR003W||ebi.ac.uk:Database:sgd;A_06_P4640||www.chem.agilent.com:Database:agp		A_06_P4640	1083586	OLIGO	14.605000023	.376296296	70	3	1	284			1528	78	1	.05212449319	1	1	0	0	0	0	0	0	0	0	0	1689.955	1280.915	1	25.18095	21.7
285					CPA2	10	C	632856	629500	arginine biosynthesis	carbamoyl-phosphate synthase (glutamine-hydrolyzing) activity					YJR109C	YJR109C||ebi.ac.uk:Database:sgd;A_06_P4352||www.chem.agilent.com:Database:agp		A_06_P4352	1081964	OLIGO	14.81666669	.376296296	71	3	1	285			1549	77	1	.04997218558	1	1	0	0	0	0	0	0	0	0	1	5050.171	6552.029	1	63.88928	22.10662
286					PEX3	4	C	1127588	1126263	peroxisome organization and biogenesis*	protein binding					YDR329C	YDR329C||ebi.ac.uk:Database:sgd;A_06_P2320||www.chem.agilent.com:Database:agp		A_06_P2320	1081340	OLIGO	15.028333357	.376296296	72	3	1	286			1571	78	1	.05548773272	1	1	0	0	0	0	0	0	0	0	1	880.1149	841.8847	1	17.36933	21.86477
287					ROD1	15	W	364368	366881	response to drug	molecular function unknown					YOR018W	YOR018W||ebi.ac.uk:Database:sgd;A_06_P6380||www.chem.agilent.com:Database:agp		A_06_P6380	1086572	OLIGO	15.240000024	.376296296	73	3	1	287			1592	77	1	.08334765266	1	1	0	0	0	0	0	0	0	0	1	323.9249	334.5295	1	9.73438	21.83774
288					BRE4	4	C	42245	38868	endocytosis	molecular function unknown					YDL231C	YDL231C||ebi.ac.uk:Database:sgd;A_06_P1966||www.chem.agilent.com:Database:agp		A_06_P1966	1080877	OLIGO	15.451666691	.376296296	74	3	1	288			1613	77	1	.0526017813	1	1	0	0	0	0	0	0	0	0	0	4611.437	2641.122	1	72.62283	22.06439
289						7	C	191982	191404							YGL165C	YGL165C||ebi.ac.uk:Database:sgd;A_06_P3120||www.chem.agilent.com:Database:agp		A_06_P3120	1085954	OLIGO	15.663333358	.376296296	75	3	1	289			1633	76	1	.580305653	1	1	0	0	0	0	0	0	0	0	1	37.10595	39.5719	1	6.961621	22.1161
290					SEC65	13	C	58687	57866	protein-ER targeting*	molecular function unknown					YML105C	YML105C||ebi.ac.uk:Database:sgd;A_06_P5398||www.chem.agilent.com:Database:agp		A_06_P5398	1084074	OLIGO	15.875000025	.376296296	76	3	1	290			1655	78	1	.05296283529	1	1	0	0	0	0	0	0	0	0	0	2901.599	1692.39	1	60.80623	22.43019
291						10	C	422927	422613							YJL007C	YJL007C||ebi.ac.uk:Database:sgd;A_06_P4028||www.chem.agilent.com:Database:agp		A_06_P4028	1085119	OLIGO	16.086666692	.376296296	77	3	1	291			1677	77	1	.6684040218	1	1	0	0	0	0	0	0	0	0	0	37.66171	29.1914	1	6.77255	22.39925
292																	E1A_r60_a97||AgilentControlDB;(+)E1A_r60_a97||AgilentControlDB		(+)E1A_R60_A97	1545264	CONTROL	16.298333359	.376296296	78	3	1	292			1698	78	1	.6591924251	1	1	0	0	0	0	0	0	0	0	0	32.06557	35.41384	1	5.045834	22.20364
293					CWP2	11	W	258898	259176	cell wall organization and biogenesis*	structural constituent of cell wall					YKL096W-A	YKL096W-A||ebi.ac.uk:Database:sgd;A_06_P4507||www.chem.agilent.com:Database:agp		A_06_P4507	1083843	OLIGO	16.510000026	.376296296	79	3	1	293			1720	77	1	.0575683759	1	1	0	0	0	0	0	0	0	0	1	21293.08	54596.91	1	202.7698	22.06985
294						10	C	219933	218770	biological process unknown	molecular function unknown					YJL107C	YJL107C||ebi.ac.uk:Database:sgd;A_06_P4129||www.chem.agilent.com:Database:agp		A_06_P4129	1086909	OLIGO	16.721666693	.376296296	80	3	1	294			1740	77	1	.3781618291	1	1	0	0	0	0	0	0	0	0	0	36.95613	89.13995	1	5.951875	22.27027
295						4	C	1520680	1519646	biological process unknown	dihydrokaempferol 4-reductase activity					YDR541C	YDR541C||ebi.ac.uk:Database:sgd;A_06_P2535||www.chem.agilent.com:Database:agp		A_06_P2535	1085553	OLIGO	16.93333336	.376296296	81	3	1	295			1761	77	1	.0601040677	1	1	0	0	0	0	0	0	0	0	1	629.1479	652.0434	1	12.33794	22.07749
296					MSY1	16	W	364949	366427	tyrosyl-tRNA aminoacylation	tyrosine-tRNA ligase activity					YPL097W	YPL097W||ebi.ac.uk:Database:sgd;A_06_P6856||www.chem.agilent.com:Database:agp		A_06_P6856	1083638	OLIGO	17.145000027	.376296296	82	3	1	296			1782	78	1	.07848650076	1	1	0	0	0	0	0	0	0	0	1	367.647	356.6568	1	10.95295	22.19615
297						13	W	772914	774014	biological process unknown	molecular function unknown					YMR251W	YMR251W||ebi.ac.uk:Database:sgd;A_06_P5689||www.chem.agilent.com:Database:agp		A_06_P5689	1085934	OLIGO	17.356666694	.376296296	83	3	1	297			1803	77	1	.1493893779	1	1	0	0	0	0	0	0	0	0	0	224.8513	107.8915	1	8.966296	22.2874
298						14	W	708523	711204	response to pheromone	protein kinase activity					YNR047W	YNR047W||ebi.ac.uk:Database:sgd;A_06_P6160||www.chem.agilent.com:Database:agp		A_06_P6160	1081329	OLIGO	17.568333361	.376296296	84	3	1	298			1825	78	1	.05470732494	1	1	0	0	0	0	0	0	0	0	1	949.1474	898.5959	1	17.40275	22.46468
299					CPR8	14	W	676177	677103	biological process unknown	peptidyl-prolyl cis-trans isomerase activity					YNR028W	YNR028W||ebi.ac.uk:Database:sgd;A_06_P6139||www.chem.agilent.com:Database:agp		A_06_P6139	1082698	OLIGO	17.780000028	.376296296	85	3	1	299			1846	77	1	.05544402907	1	1	0	0	0	0	0	0	0	0	0	1130.933	798.8711	1	25.56855	22.54717
300					ATG12	2	W	657827	658387	protein-vacuolar targeting*	molecular function unknown					YBR217W	YBR217W||ebi.ac.uk:Database:sgd;A_06_P1470||www.chem.agilent.com:Database:agp		A_06_P1470	1082235	OLIGO	17.991666695	.376296296	86	3	1	300			1867	78	1	.1757257485	1	1	0	0	0	0	0	0	0	0	1	157.9601	108.4857	1	6.064397	22.45588
301						4	W	857677	857994							YDR203W	YDR203W||ebi.ac.uk:Database:sgd;A_06_P2192||www.chem.agilent.com:Database:agp		A_06_P2192	1086282	OLIGO	18.203333362	.376296296	87	3	1	301			1888	77	1	.6785046078	1	1	0	0	0	0	0	0	0	0	1	36.50649	29.2581	1	4.937417	22.08922
302						3	C	301295	300828	biological process unknown	molecular function unknown					YCR099C	YCR099C||ebi.ac.uk:Database:sgd;A_06_P1720||www.chem.agilent.com:Database:agp		A_06_P1720	1082941	OLIGO	18.415000029	.376296296	88	3	1	302			1909	78	1	.2173713327	1	1	0	0	0	0	0	0	0	0	1	139.9327	76.57192	1	6.84524	21.98921
303					FOB1	4	W	676097	677797	replicative cell aging*	ribosomal DNA (rDNA) binding					YDR110W	YDR110W||ebi.ac.uk:Database:sgd;A_06_P2098||www.chem.agilent.com:Database:agp		A_06_P2098	1083328	OLIGO	18.626666696	.376296296	89	3	1	303			1931	77	1	.06467164153	1	1	0	0	0	0	0	0	0	0	1	582.1479	484.9727	1	14.92952	22.24904
304					MSF1	16	W	657526	658935	protein biosynthesis	phenylalanine-tRNA ligase activity					YPR047W	YPR047W||ebi.ac.uk:Database:sgd;A_06_P7093||www.chem.agilent.com:Database:agp		A_06_P7093	1084330	OLIGO	18.838333363	.376296296	90	3	1	304			1952	78	1	.05768045035	1	1	0	0	0	0	0	0	0	0	0	662.6375	895.1016	1	15.4878	22.07224
305																	(+)E1A_r60_3||AgilentControlDB;E1A_r60_3||AgilentControlDB		(+)E1A_R60_3	1545261	CONTROL	19.05000003	.376296296	91	3	1	305			1973	77	1	.6732736908	1	1	0	0	0	0	0	0	0	0	0	36.08865	30.10023	1	5.702225	21.79487
306					SSO1	16	W	107275	108147	vesicle fusion*	t-SNARE activity					YPL232W	YPL232W||ebi.ac.uk:Database:sgd;A_06_P6992||www.chem.agilent.com:Database:agp		A_06_P6992	1084099	OLIGO	19.261666697	.376296296	92	3	1	306			1994	77	1	.05010615723	1	1	0	0	0	0	0	0	0	0	1	3041.578	2538.074	1	42.56696	22.01476
307					CLB6	7	C	706505	705363	G1/S transition of mitotic cell cycle*	cyclin-dependent protein kinase regulator activity					YGR109C	YGR109C||ebi.ac.uk:Database:sgd;A_06_P3329||www.chem.agilent.com:Database:agp		A_06_P3329	1086692	OLIGO	19.473333364	.376296296	93	3	1	307			2015	77	1	.2095956954	1	1	0	0	0	0	0	0	0	0	1	113.7765	103.9162	1	7.59342	22.25547
308					PDC2	4	C	610077	607300	transcription from RNA polymerase II promoter*	transcription regulator activity					YDR081C	YDR081C||ebi.ac.uk:Database:sgd;A_06_P2069||www.chem.agilent.com:Database:agp		A_06_P2069	1085610	OLIGO	19.685000031	.376296296	94	3	1	308			2036	78	1	.0538189777	1	1	0	0	0	0	0	0	0	0	0	1118.901	957.0285	1	20.18047	22.04693
309					NDE1	13	C	556474	554792	ethanol fermentation*	NADH dehydrogenase activity					YMR145C	YMR145C||ebi.ac.uk:Database:sgd;A_06_P5577||www.chem.agilent.com:Database:agp		A_06_P5577	1084029	OLIGO	19.896666698	.376296296	95	3	1	309			2057	77	1	.04919346371	1	1	0	0	0	0	0	0	1	0	0	12403.77	13068.08	1	228.3413	22.14583
310						7	W	733940	735148	biological process unknown	molecular function unknown					YGR122W	YGR122W||ebi.ac.uk:Database:sgd;A_06_P3343||www.chem.agilent.com:Database:agp		A_06_P3343	1082277	OLIGO	20.108333365	.376296296	96	3	1	310			2079	78	1	.1054360714	1	1	0	0	0	0	0	0	0	0	1	239.1246	235.9914	1	8.589077	22.09191
311					BPH1	3	W	179515	186018	cell wall organization and biogenesis*	molecular function unknown					YCR032W	YCR032W||ebi.ac.uk:Database:sgd;A_06_P1657||www.chem.agilent.com:Database:agp		A_06_P1657	1083204	OLIGO	20.320000032	.376296296	97	3	1	311			2100	77	1	.05067877607	1	1	0	0	0	0	0	0	0	0	1	1918.153	1752.982	1	37.33342	22.24427
312					RAD27	11	C	225521	224373	DNA repair*	5'-flap endonuclease activity					YKL113C	YKL113C||ebi.ac.uk:Database:sgd;A_06_P4525||www.chem.agilent.com:Database:agp		A_06_P4525	1083443	OLIGO	20.531666699	.376296296	98	3	1	312			2121	78	1	.05295221487	1	1	0	0	0	0	0	0	0	0	0	1286.573	1070.31	1	23.36611	22.24275
313						12	C	612119	611796							YLR236C	YLR236C||ebi.ac.uk:Database:sgd;A_06_P5050||www.chem.agilent.com:Database:agp		A_06_P5050	1082693	OLIGO	20.743333366	.376296296	99	3	1	313			2143	77	1	.1594426811	1	1	0	0	0	0	0	0	0	0	1	125.7196	169.1908	1	8.974458	21.92481
314					ANT1	16	C	792200	791214	peroxisome organization and biogenesis*	adenine nucleotide transporter activity					YPR128C	YPR128C||ebi.ac.uk:Database:sgd;A_06_P7175||www.chem.agilent.com:Database:agp		A_06_P7175	1082955	OLIGO	20.955000033	.376296296	100	3	1	314			2163	78	1	.05282301429	1	1	0	0	0	0	0	0	0	0	1	1141.476	1144.11	1	18.74887	22.0709
315						5	W	98668	99129							YEL028W	YEL028W||ebi.ac.uk:Database:sgd;A_06_P2569||www.chem.agilent.com:Database:agp		A_06_P2569	1082253	OLIGO	21.1666667	.376296296	101	3	1	315			2184	77	1	.1899939525	1	1	0	0	0	0	0	0	0	0	1	116.5547	125.0553	1	5.998186	22.63636
316						12	C	573920	573468	biological process unknown	molecular function unknown					YLR218C	YLR218C||ebi.ac.uk:Database:sgd;A_06_P5032||www.chem.agilent.com:Database:agp		A_06_P5032	1081171	OLIGO	21.378333367	.376296296	102	3	1	316			2205	78	1	.05414629599	1	1	0	0	0	0	0	0	0	0	0	914.8313	1176.955	1	21.31007	22.52529
317					SWH1	1	W	192613	196179	steroid biosynthesis	phosphatidylinositol binding					YAR042W	YAR042W||ebi.ac.uk:Database:sgd;A_06_P1114||www.chem.agilent.com:Database:agp		A_06_P1114	1081239	OLIGO	21.590000034	.376296296	103	3	1	317			2227	77	1	.7015537346	1	1	0	0	0	0	0	0	0	0	1	34.53413	28.96253	1	6.93158	22.33929
318																	E1A_r60_n11||AgilentControlDB;(+)E1A_r60_n11||AgilentControlDB		(+)E1A_R60_N11	1545266	CONTROL	21.801666701	.376296296	104	3	1	318			2248	78	1	.07278311676	1	1	0	0	0	0	0	0	0	0	0	298.3907	815.1774	1	6.561984	22.64234
319					MET16	16	C	877628	876843	methionine metabolism*	phosphoadenylyl-sulfate reductase (thioredoxin) activity					YPR167C	YPR167C||ebi.ac.uk:Database:sgd;A_06_P7215||www.chem.agilent.com:Database:agp		A_06_P7215	1086635	OLIGO	22.013333368	.376296296	105	3	1	319			2269	77	1	.0515506376	1	1	0	0	0	0	0	0	0	0	1	1525.607	1379.838	1	30.96942	22.65748
320					EPS1	9	W	345689	347794	protein retention in ER	protein disulfide isomerase activity					YIL005W	YIL005W||ebi.ac.uk:Database:sgd;A_06_P3803||www.chem.agilent.com:Database:agp		A_06_P3803	1081558	OLIGO	22.225000035	.376296296	106	3	1	320			2290	78	1	.05199458742	1	1	0	0	0	0	0	0	0	0	1	1441.733	1257.626	1	28.5261	22.48315
321						15	W	798013	798315							YOR248W	YOR248W||ebi.ac.uk:Database:sgd;A_06_P6609||www.chem.agilent.com:Database:agp		A_06_P6609	1081762	OLIGO	22.436666702	.376296296	107	3	1	321			2312	77	1	.05481080024	1	1	0	0	0	0	0	0	0	0	1	7333.478	15697.46	1	117.9985	21.55849
322					ERR3	13	W	920086	921399	biological process unknown	phosphopyruvate hydratase activity					YMR323W	YMR323W||ebi.ac.uk:Database:sgd;A_06_P5768||www.chem.agilent.com:Database:agp		A_06_P5768	1083995	OLIGO	0	.564444444	1	4	1	322			67	96	1	.2936696735	1	1	0	0	0	0	0	0	0	0	1	104.9317	54.12065	1	7.176736	21.42126
323					RPS31	12	W	498949	499407	protein biosynthesis*	structural constituent of ribosome*					YLR167W	YLR167W||ebi.ac.uk:Database:sgd;A_06_P4981||www.chem.agilent.com:Database:agp		A_06_P4981	1082161	OLIGO	.211666667	.564444444	2	4	1	323			89	96	1	.04952611949	1	1	0	0	0	0	0	0	0	0	1	73665.93	89587.96	1	735.1651	21.76894
324						2	C	767602	764966	biological process unknown	molecular function unknown					YBR281C	YBR281C||ebi.ac.uk:Database:sgd;A_06_P1535||www.chem.agilent.com:Database:agp		A_06_P1535	1080700	OLIGO	.423333334	.564444444	3	4	1	324			110	95	1	.06197534613	1	1	0	0	0	0	0	0	0	0	1	557.6894	621.7947	1	15.28393	22.00372
325																	E1A_r60_a97||AgilentControlDB;(+)E1A_r60_a97||AgilentControlDB		(+)E1A_R60_A97	1545264	CONTROL	.635000001	.564444444	4	4	1	325			131	96	1	.6866405546	1	1	0	0	0	0	0	0	0	0	0	31.43994	33.2918	1	5.186608	21.93585
326					KIN2	12	W	332591	336034	exocytosis	protein kinase activity					YLR096W	YLR096W||ebi.ac.uk:Database:sgd;A_06_P4908||www.chem.agilent.com:Database:agp		A_06_P4908	1086051	OLIGO	.846666668	.564444444	5	4	1	326			153	96	1	.05626561965	1	1	0	0	0	0	0	0	0	0	1	804.8857	811.8751	1	17.59584	21.95522
327						4	C	636522	636112							YDR095C	YDR095C||ebi.ac.uk:Database:sgd;A_06_P2083||www.chem.agilent.com:Database:agp		A_06_P2083	1086409	OLIGO	1.058333335	.564444444	6	4	1	327			174	96	1	.673767757	1	1	0	0	0	0	0	0	0	0	1	37.41148	28.91463	1	6.378684	21.73188
328					RSC30	8	C	217835	215184	regulation of transcription, DNA-dependent	DNA binding					YHR056C	YHR056C||ebi.ac.uk:Database:sgd;A_06_P3629||www.chem.agilent.com:Database:agp		A_06_P3629	1083968	OLIGO	1.270000002	.564444444	7	4	1	328			195	96	1	.05083098663	1	1	0	0	0	0	0	0	0	0	1	1686.67	1721.329	1	33.60698	21.81784
329					PRP12	13	C	872624	870072	rRNA processing*	exonuclease activity					YMR302C	YMR302C||ebi.ac.uk:Database:sgd;A_06_P5743||www.chem.agilent.com:Database:agp		A_06_P5743	1081992	OLIGO	1.481666669	.564444444	8	4	1	329			216	97	1	.05144384486	1	1	0	0	0	0	0	0	0	0	1	1598.941	1413.691	1	24.14052	21.72202
330					FZO1	2	C	589109	586542	mitochondrion organization and biogenesis*	GTPase activity					YBR179C	YBR179C||ebi.ac.uk:Database:sgd;A_06_P1432||www.chem.agilent.com:Database:agp		A_06_P1432	1080903	OLIGO	1.693333336	.564444444	9	4	1	330			237	96	1	.05878082031	1	1	0	0	0	0	0	0	0	0	1	741.402	646.9516	1	18.02856	21.98535
331						11	W	562189	564780	biological process unknown	molecular function unknown					YKR064W	YKR064W||ebi.ac.uk:Database:sgd;A_06_P4702||www.chem.agilent.com:Database:agp		A_06_P4702	1081342	OLIGO	1.905000003	.564444444	10	4	1	331			259	96	1	.07862631824	1	1	0	0	0	0	0	0	0	0	0	418.2168	316.2302	1	9.028929	21.81579
332					MRS11	8	C	115895	115614	mitochondrial inner membrane protein import	unfolded protein binding*					YHR005C-A	YHR005C-A||ebi.ac.uk:Database:sgd;A_06_P3575||www.chem.agilent.com:Database:agp		A_06_P3575	1084579	OLIGO	2.11666667	.564444444	11	4	1	332			280	96	1	.05662406434	1	1	0	0	0	0	0	0	0	0	0	895.5971	1811.481	1	18.12511	21.77338
333					HSP82	16	C	98625	96496	response to stress*	ATPase activity, coupled					YPL240C	YPL240C||ebi.ac.uk:Database:sgd;A_06_P7000||www.chem.agilent.com:Database:agp		A_06_P7000	1081205	OLIGO	2.328333337	.564444444	12	4	1	333			301	96	1	.04941293654	1	1	0	0	0	0	0	0	0	0	1	4828.594	4504.974	1	57.94967	21.53986
334					PYK2	15	C	986457	984937	pyruvate metabolism	pyruvate kinase activity					YOR347C	YOR347C||ebi.ac.uk:Database:sgd;A_06_P6711||www.chem.agilent.com:Database:agp		A_06_P6711	1081221	OLIGO	2.540000004	.564444444	13	4	1	334			322	96	1	.04961613576	1	1	0	0	0	0	0	0	0	0	1	4301.57	5034.402	1	33.73476	22.12274
335					RNR1	5	W	298948	301614	DNA replication	ribonucleoside-diphosphate reductase activity					YER070W	YER070W||ebi.ac.uk:Database:sgd;A_06_P2701||www.chem.agilent.com:Database:agp		A_06_P2701	1085763	OLIGO	2.751666671	.564444444	14	4	1	335			343	96	1	.04930455369	1	1	0	0	0	0	0	0	0	0	1	9223.054	8334.422	1	88.78299	22.21978
336					TIF6	16	C	593066	592329	ribosomal large subunit biogenesis*	molecular function unknown					YPR016C	YPR016C||ebi.ac.uk:Database:sgd;A_06_P7061||www.chem.agilent.com:Database:agp		A_06_P7061	1083683	OLIGO	2.963333338	.564444444	15	4	1	336			364	95	1	.04970934902	1	1	0	0	0	0	0	0	0	0	1	6178.367	7659.1	1	108.8218	22.0916
337					IPP1	2	C	257973	257110	phosphate metabolism	inorganic diphosphatase activity					YBR011C	YBR011C||ebi.ac.uk:Database:sgd;A_06_P1258||www.chem.agilent.com:Database:agp		A_06_P1258	1083751	OLIGO	3.175000005	.564444444	16	4	1	337			386	97	1	.04914786429	1	1	0	0	0	0	0	0	0	0	1	23240.1	23703.05	1	307.1159	22.16604
338																	(+)E1A_r60_3||AgilentControlDB;E1A_r60_3||AgilentControlDB		(+)E1A_R60_3	1545261	CONTROL	3.386666672	.564444444	17	4	1	338			407	95	1	.6662254001	1	1	0	0	0	1	0	0	0	0	0	35.55491	31.24664	1	4.842358	21.71863
339					PCP1	7	W	693367	694407	mitochondrion organization and biogenesis*	peptidase activity					YGR101W	YGR101W||ebi.ac.uk:Database:sgd;A_06_P3321||www.chem.agilent.com:Database:agp		A_06_P3321	1085467	OLIGO	3.598333339	.564444444	18	4	1	339			428	96	1	.05037260037	1	1	0	0	0	0	0	0	0	0	1	2537.301	3266.465	1	47.24997	21.35741
340					THG1	7	C	532600	531887	tRNA modification	tRNA guanylyltransferase activity					YGR024C	YGR024C||ebi.ac.uk:Database:sgd;A_06_P3244||www.chem.agilent.com:Database:agp		A_06_P3244	1081292	OLIGO	3.810000006	.564444444	19	4	1	340			449	95	1	.05560386158	1	1	0	0	0	0	0	0	0	0	1	894.4749	819.1855	1	17.61192	21.60072
341					YAP6	4	C	975776	974625	positive regulation of transcription from RNA polymerase II promoter	RNA polymerase II transcription factor activity					YDR259C	YDR259C||ebi.ac.uk:Database:sgd;A_06_P2248||www.chem.agilent.com:Database:agp		A_06_P2248	1083864	OLIGO	4.021666673	.564444444	20	4	1	341			470	96	1	.1551970027	1	1	0	0	0	0	0	0	0	0	1	156.4643	144.7957	1	6.760361	22.10861
342						12	C	368125	366668	biological process unknown	molecular function unknown					YLR108C	YLR108C||ebi.ac.uk:Database:sgd;A_06_P4921||www.chem.agilent.com:Database:agp		A_06_P4921	1086278	OLIGO	4.23333334	.564444444	21	4	1	342			491	96	1	.05363441001	1	1	0	0	0	0	0	0	0	0	0	981.0787	1301.136	1	19.30724	21.98227
343						5	C	65167	64709	biological process unknown	molecular function unknown					YEL048C	YEL048C||ebi.ac.uk:Database:sgd;A_06_P2589||www.chem.agilent.com:Database:agp		A_06_P2589	1085064	OLIGO	4.445000007	.564444444	22	4	1	343			512	96	1	.2186897599	1	1	0	0	0	0	0	0	0	0	1	86.98965	123.3944	1	7.070501	22.02247
344					DBP9	12	C	696832	695048	35S primary transcript processing*	ATP-dependent RNA helicase activity					YLR276C	YLR276C||ebi.ac.uk:Database:sgd;A_06_P5091||www.chem.agilent.com:Database:agp		A_06_P5091	1084439	OLIGO	4.656666674	.564444444	23	4	1	344			534	95	1	.05121680534	1	1	0	0	0	0	0	0	0	0	1	1586.612	1502.537	1	31.12738	21.46332
345					FOL3	13	W	494998	496281	folic acid and derivative biosynthesis	dihydrofolate synthase activity					YMR113W	YMR113W||ebi.ac.uk:Database:sgd;A_06_P5542||www.chem.agilent.com:Database:agp		A_06_P5542	1085641	OLIGO	4.868333341	.564444444	24	4	1	345			555	97	1	.05269602499	1	1	0	0	0	0	0	0	0	0	0	1116.773	1381.351	1	22.50939	21.38431
346					RPA14	4	W	769520	769933	transcription from RNA polymerase I promoter	DNA-directed RNA polymerase activity					YDR156W	YDR156W||ebi.ac.uk:Database:sgd;A_06_P2144||www.chem.agilent.com:Database:agp		A_06_P2144	1080899	OLIGO	5.080000008	.564444444	25	4	1	346			576	95	1	.05450843429	1	1	0	0	0	0	0	0	0	0	0	1396.089	2681.449	1	23.84996	21.56439
347						5	W	86179	86598							YEL033W	YEL033W||ebi.ac.uk:Database:sgd;A_06_P2574||www.chem.agilent.com:Database:agp		A_06_P2574	1084259	OLIGO	5.291666675	.564444444	26	4	1	347			597	97	1	.2659569499	1	1	0	0	0	0	0	0	0	0	1	86.80914	82.79246	1	6.099697	21.54317
348					VAM3	15	W	519121	519972	vesicle fusion*	t-SNARE activity					YOR106W	YOR106W||ebi.ac.uk:Database:sgd;A_06_P6468||www.chem.agilent.com:Database:agp		A_06_P6468	1086096	OLIGO	5.503333342	.564444444	27	4	1	348			618	96	1	.07305871205	1	1	0	0	0	0	0	0	0	0	0	493.4311	351.1825	1	12.65689	21.27509
349						9	C	433717	433385							YIR040C	YIR040C||ebi.ac.uk:Database:sgd;A_06_P4017||www.chem.agilent.com:Database:agp		A_06_P4017	1082065	OLIGO	5.715000009	.564444444	28	4	1	349			639	96	1	.7499937705	1	1	0	0	0	0	0	0	0	0	0	31.62326	27.68755	1	5.289213	21.5057
350					MED1	16	W	685895	687595	transcription from RNA polymerase II promoter	RNA polymerase II transcription mediator activity					YPR070W	YPR070W||ebi.ac.uk:Database:sgd;A_06_P7116||www.chem.agilent.com:Database:agp		A_06_P7116	1081967	OLIGO	5.926666676	.564444444	29	4	1	350			661	96	1	.06045311624	1	1	0	0	0	0	0	0	0	0	0	756.8571	560.3194	1	14.15187	21.63396
352					SRP102	11	W	161606	162340	protein-ER targeting*	GTPase activity*					YKL154W	YKL154W||ebi.ac.uk:Database:sgd;A_06_P4566||www.chem.agilent.com:Database:agp		A_06_P4566	1081678	OLIGO	6.35000001	.564444444	31	4	1	352			703	95	1	.06910380109	1	1	0	0	0	0	0	0	0	0	0	516.2708	410.3347	1	16.64505	21.57993
353					MIH1	13	C	343519	341855	G2/M transition of mitotic cell cycle*	protein tyrosine phosphatase activity					YMR036C	YMR036C||ebi.ac.uk:Database:sgd;A_06_P5465||www.chem.agilent.com:Database:agp		A_06_P5465	1082194	OLIGO	6.561666677	.564444444	32	4	1	353			724	97	1	.08792464312	1	1	0	0	0	0	0	0	0	0	1	292.6404	315.8426	1	11.91312	22.05455
354						14	W	418964	419509							YNL109W	YNL109W||ebi.ac.uk:Database:sgd;A_06_P5880||www.chem.agilent.com:Database:agp		A_06_P5880	1084717	OLIGO	6.773333344	.564444444	33	4	1	354			745	96	1	.5450627338	1	1	0	0	0	0	0	0	0	0	1	43.91184	37.88581	1	6.513267	22.23774
355					SEC66	2	W	578359	578979	filamentous growth*	protein transporter activity					YBR171W	YBR171W||ebi.ac.uk:Database:sgd;A_06_P1424||www.chem.agilent.com:Database:agp		A_06_P1424	1081844	OLIGO	6.985000011	.564444444	34	4	1	355			766	97	1	.05035617369	1	1	0	0	0	0	0	0	0	0	1	3073.801	2427.856	1	61.80459	22.14338
356					TIM8	10	W	676886	677149	mitochondrial inner membrane protein import	protein transporter activity					YJR135W-A	YJR135W-A||ebi.ac.uk:Database:sgd;A_06_P4379||www.chem.agilent.com:Database:agp		A_06_P4379	1081639	OLIGO	7.196666678	.564444444	35	4	1	356			788	96	1	.05446180953	1	1	0	0	0	0	0	0	0	0	0	1267.056	2364.786	1	28.11265	22.35055
357					RME1	7	C	583896	582994	meiosis*	specific transcriptional repressor activity					YGR044C	YGR044C||ebi.ac.uk:Database:sgd;A_06_P3264||www.chem.agilent.com:Database:agp		A_06_P3264	1086271	OLIGO	7.408333345	.564444444	36	4	1	357			809	96	1	.05134308291	1	1	0	0	0	0	0	0	0	0	0	2188.519	1634.979	1	36.74771	22.20677
358						13	C	768038	763350	biological process unknown	molecular function unknown					YMR247C	YMR247C||ebi.ac.uk:Database:sgd;A_06_P5687||www.chem.agilent.com:Database:agp		A_06_P5687	1083915	OLIGO	7.620000012	.564444444	37	4	1	358			830	95	1	.05509522893	1	1	0	0	0	0	0	0	0	0	1	906.0227	874.1964	1	19.17294	21.91336
359					ORC3	12	W	141072	142922	DNA replication initiation*	DNA replication origin binding					YLL004W	YLL004W||ebi.ac.uk:Database:sgd;A_06_P4748||www.chem.agilent.com:Database:agp		A_06_P4748	1080778	OLIGO	7.831666679	.564444444	38	4	1	359			851	97	1	.06323442213	1	1	0	0	0	0	0	0	0	0	1	523.4854	597.959	1	11.88398	22.00369
360					QDR2	9	W	132241	133869	multidrug transport	multidrug efflux pump activity					YIL121W	YIL121W||ebi.ac.uk:Database:sgd;A_06_P3920||www.chem.agilent.com:Database:agp		A_06_P3920	1086888	OLIGO	8.043333346	.564444444	39	4	1	360			873	96	1	.05153722849	1	1	0	0	0	0	0	0	0	0	0	5663.446	3557.623	1	67.88462	22.02273
361					SFC1	10	W	609690	610658	fumarate transport*	succinate:fumarate antiporter activity					YJR095W	YJR095W||ebi.ac.uk:Database:sgd;A_06_P4338||www.chem.agilent.com:Database:agp		A_06_P4338	1085959	OLIGO	8.255000013	.564444444	40	4	1	361			893	96	1	.4451430081	1	1	0	0	0	0	0	0	0	0	1	41.2144	60.1967	1	6.128158	22.3668
362						12	C	548771	547855	biological process unknown	molecular function unknown					YLR199C	YLR199C||ebi.ac.uk:Database:sgd;A_06_P5013||www.chem.agilent.com:Database:agp		A_06_P5013	1083706	OLIGO	8.46666668	.564444444	41	4	1	362			914	96	1	.05252309665	1	1	0	0	0	0	0	0	0	0	1	1159.004	1250.759	1	20.12549	22.48327
363					VAC14	12	W	893628	896270	vacuole inheritance*	enzyme activator activity					YLR386W	YLR386W||ebi.ac.uk:Database:sgd;A_06_P5204||www.chem.agilent.com:Database:agp		A_06_P5204	1084471	OLIGO	8.678333347	.564444444	42	4	1	363			935	97	1	.09271998523	1	1	0	0	0	0	0	0	0	0	1	291.7661	272.3391	1	8.679867	22.29963
364																	(+)E1A_r60_a104||AgilentControlDB;E1A_r60_a104||AgilentControlDB		(+)E1A_R60_A104	1545260	CONTROL	8.890000014	.564444444	43	4	1	364			957	95	1	.6807923835	1	1	0	0	0	0	0	0	0	0	0	37.73866	28.02173	1	6.062301	22.38636
365					ECO1	6	W	207440	208285	DNA repair*	acetyltransferase activity					YFR027W	YFR027W||ebi.ac.uk:Database:sgd;A_06_P2923||www.chem.agilent.com:Database:agp		A_06_P2923	1085538	OLIGO	9.101666681	.564444444	44	4	1	365			978	97	1	.1069536247	1	1	0	0	0	0	0	0	0	0	1	253.7896	214.5837	1	8.293138	22.40221
366					SNA3	10	C	136691	136290	biological process unknown	molecular function unknown					YJL151C	YJL151C||ebi.ac.uk:Database:sgd;A_06_P4172||www.chem.agilent.com:Database:agp		A_06_P4172	1084357	OLIGO	9.313333348	.564444444	45	4	1	366			999	96	1	.0498511689	1	1	0	0	0	0	0	0	0	0	1	5233.989	4200.819	1	54.20671	22.21887
367					SBE22	8	W	320416	322974	cell wall organization and biogenesis	molecular function unknown					YHR103W	YHR103W||ebi.ac.uk:Database:sgd;A_06_P3678||www.chem.agilent.com:Database:agp		A_06_P3678	1083955	OLIGO	9.525000015	.564444444	46	4	1	367			1020	97	1	.05169347447	1	1	0	0	0	0	0	0	0	0	1	1551.016	1338.472	1	21.10547	21.97388
368						14	W	222238	222648							YNL226W	YNL226W||ebi.ac.uk:Database:sgd;A_06_P5998||www.chem.agilent.com:Database:agp		A_06_P5998	1081663	OLIGO	9.736666682	.564444444	47	4	1	368			1042	95	1	.6664362124	1	1	0	0	0	0	0	0	0	0	0	33.87543	32.81659	1	5.236719	22.15809
369					LYS5	7	C	216101	215283	lysine biosynthesis via aminoadipic acid*	phosphopantetheinyltransferase activity					YGL154C	YGL154C||ebi.ac.uk:Database:sgd;A_06_P3109||www.chem.agilent.com:Database:agp		A_06_P3109	1081803	OLIGO	9.948333349	.564444444	48	4	1	369			1063	97	1	.05805219259	1	1	0	0	0	0	0	0	0	0	1	706.1362	728.2782	1	13.85874	22.36531
370					SAS10	4	C	183019	181187	processing of 20S pre-rRNA*	snoRNA binding					YDL153C	YDL153C||ebi.ac.uk:Database:sgd;A_06_P1886||www.chem.agilent.com:Database:agp		A_06_P1886	1083490	OLIGO	10.160000016	.564444444	49	4	1	370			1084	96	1	.04996859184	1	1	0	0	0	0	0	0	0	0	1	2582.1	2421.894	1	51.46063	21.80297
371					SHE3	2	C	496863	495586	intracellular mRNA localization*	mRNA binding					YBR130C	YBR130C||ebi.ac.uk:Database:sgd;A_06_P1382||www.chem.agilent.com:Database:agp		A_06_P1382	1083485	OLIGO	10.371666683	.564444444	50	4	1	371			1105	96	1	.07136801267	1	1	0	0	0	0	0	0	0	0	1	424.6116	431.7256	1	9.10561	22.01087
372						4	C	478195	477806							YDR015C	YDR015C||ebi.ac.uk:Database:sgd;A_06_P2000||www.chem.agilent.com:Database:agp		A_06_P2000	1081867	OLIGO	10.58333335	.564444444	51	4	1	372			1126	96	1	.3245038514	1	1	0	0	0	0	0	0	0	0	1	59.99118	79.11621	1	6.897063	22.46565
373					MIG2	7	W	95862	97010	regulation of transcription from RNA polymerase II promoter*	specific RNA polymerase II transcription factor activity					YGL209W	YGL209W||ebi.ac.uk:Database:sgd;A_06_P3164||www.chem.agilent.com:Database:agp		A_06_P3164	1086634	OLIGO	10.795000017	.564444444	52	4	1	373			1147	97	1	.04971740583	1	1	0	0	0	0	0	0	0	0	1	3141.323	2939.646	1	48.32696	22.09455
374					TIR4	15	W	344334	345797	biological process unknown	molecular function unknown					YOR009W	YOR009W||ebi.ac.uk:Database:sgd;A_06_P6371||www.chem.agilent.com:Database:agp		A_06_P6371	1081761	OLIGO	11.006666684	.564444444	53	4	1	374			1168	96	1	.2060264686	1	1	0	0	0	0	0	0	0	0	1	112.6688	108.8719	1	7.936684	22.21033
375					SKP1	4	C	1126011	1125427	protein complex assembly*	protein binding*					YDR328C	YDR328C||ebi.ac.uk:Database:sgd;A_06_P2319||www.chem.agilent.com:Database:agp		A_06_P2319	1081512	OLIGO	11.218333351	.564444444	54	4	1	375			1190	96	1	.04977949323	1	1	0	0	0	0	0	0	0	0	1	3192.37	2882.969	1	44.99586	21.92647
376						4	W	255604	256530	biological process unknown	molecular function unknown					YDL114W	YDL114W||ebi.ac.uk:Database:sgd;A_06_P1844||www.chem.agilent.com:Database:agp		A_06_P1844	1085162	OLIGO	11.430000018	.564444444	55	4	1	376			1211	96	1	.6740994125	1	1	0	0	0	0	0	0	0	0	0	36.25272	29.87944	1	5.465891	22.1306
377																	E1A_r60_a22||AgilentControlDB;(+)E1A_r60_a22||AgilentControlDB		(+)E1A_R60_A22	1545265	CONTROL	11.641666685	.564444444	56	4	1	377			1232	96	1	.3179089211	1	1	0	0	0	0	0	0	0	0	0	113.0927	40.83743	1	8.013527	22.15441
378					SKI7	15	C	471621	469378	mRNA catabolism*	protein binding					YOR076C	YOR076C||ebi.ac.uk:Database:sgd;A_06_P6438||www.chem.agilent.com:Database:agp		A_06_P6438	1083745	OLIGO	11.853333352	.564444444	57	4	1	378			1253	96	1	.06422347575	1	1	0	0	0	0	0	0	0	0	1	579.655	500.7491	1	12.52686	22.69784
379						12	W	346586	346981	biological process unknown	molecular function unknown					YLR104W	YLR104W||ebi.ac.uk:Database:sgd;A_06_P4917||www.chem.agilent.com:Database:agp		A_06_P4917	1081207	OLIGO	12.065000019	.564444444	58	4	1	379			1274	96	1	.1076757926	1	1	0	0	0	0	0	0	0	0	1	197.2842	271.9229	1	8.505967	22.45802
380					ERG7	8	W	239099	241294	ergosterol biosynthesis	lanosterol synthase activity					YHR072W	YHR072W||ebi.ac.uk:Database:sgd;A_06_P3645||www.chem.agilent.com:Database:agp		A_06_P3645	1086748	OLIGO	12.276666686	.564444444	59	4	1	380			1296	96	1	.04937403509	1	1	0	0	0	0	0	0	0	0	1	6671.756	6000.562	1	92.07329	22.52788
381						10	W	376578	377252	biological process unknown	molecular function unknown					YJL037W	YJL037W||ebi.ac.uk:Database:sgd;A_06_P4058||www.chem.agilent.com:Database:agp		A_06_P4058	1086823	OLIGO	12.488333353	.564444444	60	4	1	381			1316	97	1	.4146544983	1	1	0	0	0	0	0	0	0	0	1	62.43896	46.0649	1	6.848603	22.27407
382					PRE9	7	W	761397	762173	ubiquitin-dependent protein catabolism*	endopeptidase activity					YGR135W	YGR135W||ebi.ac.uk:Database:sgd;A_06_P3356||www.chem.agilent.com:Database:agp		A_06_P3356	1086487	OLIGO	12.70000002	.564444444	61	4	1	382			1337	96	1	.04935686943	1	1	0	0	0	0	0	0	0	0	1	5329.653	5023.025	1	63.88778	22.05792
383					FUR1	8	W	362117	362767	pyrimidine salvage	uracil phosphoribosyltransferase activity					YHR128W	YHR128W||ebi.ac.uk:Database:sgd;A_06_P3703||www.chem.agilent.com:Database:agp		A_06_P3703	1084228	OLIGO	12.911666687	.564444444	62	4	1	383			1359	97	1	.05046246279	1	1	0	0	0	0	0	0	0	0	1	1984.443	2333.435	1	27.61141	22.13755
384					ATH1	16	W	615376	619011	response to stress*	alpha,alpha-trehalase activity					YPR026W	YPR026W||ebi.ac.uk:Database:sgd;A_06_P7072||www.chem.agilent.com:Database:agp		A_06_P7072	1086786	OLIGO	13.123333354	.564444444	63	4	1	384			1380	96	1	.06171468917	1	1	0	0	0	0	0	0	0	0	1	579.1289	609.0941	1	11.67536	22.12177
385					VCX1	4	W	232652	233887	calcium ion homeostasis*	calcium ion transporter activity*					YDL128W	YDL128W||ebi.ac.uk:Database:sgd;A_06_P1859||www.chem.agilent.com:Database:agp		A_06_P1859	1082383	OLIGO	13.335000021	.564444444	64	4	1	385			1401	97	1	.04949911507	1	1	0	0	0	0	0	0	0	0	1	7796.525	6629.556	1	104.5542	22.08614
386					MPA43	14	C	181021	179393	biological process unknown	molecular function unknown					YNL249C	YNL249C||ebi.ac.uk:Database:sgd;A_06_P6021||www.chem.agilent.com:Database:agp		A_06_P6021	1081856	OLIGO	13.546666688	.564444444	65	4	1	386			1422	95	1	.1351916335	1	1	0	0	0	0	0	0	0	0	1	183.164	169.0032	1	8.170861	21.95255
387						15	W	779870	780184							YOR235W	YOR235W||ebi.ac.uk:Database:sgd;A_06_P6597||www.chem.agilent.com:Database:agp		A_06_P6597	1081795	OLIGO	13.758333355	.564444444	66	4	1	387			1444	96	1	.613470615	1	1	0	0	0	0	0	0	0	0	1	41.05997	31.81827	1	7.794403	22.35252
388					PUS1	16	C	153148	151514	tRNA modification	tRNA-pseudouridine synthase activity					YPL212C	YPL212C||ebi.ac.uk:Database:sgd;A_06_P6972||www.chem.agilent.com:Database:agp		A_06_P6972	1082079	OLIGO	13.970000022	.564444444	67	4	1	388			1465	96	1	.05220442139	1	1	0	0	0	0	0	0	0	0	1	1255.416	1257.532	1	21.63211	22.01799
389					GPI17	4	W	1331227	1332831	attachment of GPI anchor to protein	GPI-anchor transamidase activity					YDR434W	YDR434W||ebi.ac.uk:Database:sgd;A_06_P2427||www.chem.agilent.com:Database:agp		A_06_P2427	1085283	OLIGO	14.181666689	.564444444	68	4	1	389			1486	97	1	.04958785346	1	1	0	0	0	0	0	0	0	0	1	4267.739	3786.91	1	50.08226	22.22305
390																	(+)E1A_r60_1||AgilentControlDB;E1A_r60_1||AgilentControlDB		(+)E1A_R60_1	1545263	CONTROL	14.393333356	.564444444	69	4	1	390			1507	96	1	.2462651212	1	1	0	0	0	0	0	0	0	0	0	78.99965	106.1393	1	7.662443	22.43542
391					TWF1	7	W	642014	643012	bipolar bud site selection*	actin monomer binding					YGR080W	YGR080W||ebi.ac.uk:Database:sgd;A_06_P3300||www.chem.agilent.com:Database:agp		A_06_P3300	1080972	OLIGO	14.605000023	.564444444	70	4	1	391			1528	96	1	.0623582162	1	1	0	0	0	0	0	0	0	0	1	542.8087	620.2829	1	12.50055	21.95522
392					ADH2	13	C	874336	873290	fermentation*	alcohol dehydrogenase activity					YMR303C	YMR303C||ebi.ac.uk:Database:sgd;A_06_P5744||www.chem.agilent.com:Database:agp		A_06_P5744	1082278	OLIGO	14.81666669	.564444444	71	4	1	392			1550	96	1	.06781479539	1	1	0	0	0	0	0	0	0	0	0	556.5115	2116.132	1	14.09453	22.49606
393					VPS60	4	C	1428110	1427421	filamentous growth*	molecular function unknown					YDR486C	YDR486C||ebi.ac.uk:Database:sgd;A_06_P2479||www.chem.agilent.com:Database:agp		A_06_P2479	1085831	OLIGO	15.028333357	.564444444	72	4	1	393			1571	97	1	.05298361546	1	1	0	0	0	0	0	0	0	0	1	1234.839	1067.818	1	18.98142	22.20455
394					VPS28	16	W	427924	428652	protein-vacuolar targeting*	molecular function unknown					YPL065W	YPL065W||ebi.ac.uk:Database:sgd;A_06_P6824||www.chem.agilent.com:Database:agp		A_06_P6824	1085618	OLIGO	15.240000024	.564444444	73	4	1	394			1592	96	1	.07171945717	1	1	0	0	0	0	0	0	0	0	0	486.2275	377.0452	1	10.90095	21.90299
395						12	W	855537	855842							YLR366W	YLR366W||ebi.ac.uk:Database:sgd;A_06_P5184||www.chem.agilent.com:Database:agp		A_06_P5184	1084705	OLIGO	15.451666691	.564444444	74	4	1	395			1613	96	1	.686529584	0	0	0	0	0	0	0	0	0	0	0	31.58784	33.14924	1	5.16469	22.13011
396					STU1	2	C	158392	153851	microtubule nucleation	structural constituent of cytoskeleton					YBL034C	YBL034C||ebi.ac.uk:Database:sgd;A_06_P1164||www.chem.agilent.com:Database:agp		A_06_P1164	1081984	OLIGO	15.663333358	.564444444	75	4	1	396			1634	95	1	.05542895487	1	1	0	0	0	0	0	0	0	0	0	985.9555	804.8914	1	20.12132	22.22593
397					COX2	17	W	73758	74513	aerobic respiration*	cytochrome-c oxidase activity					Q0250	Q0250||ebi.ac.uk:Database:sgd;A_06_P1020||www.chem.agilent.com:Database:agp		A_06_P1020	1086746	OLIGO	15.875000025	.564444444	76	4	1	397			1655	96	1	.0996121506	1	1	0	0	0	0	0	0	0	0	1	220.0335	298.6944	1	8.668987	21.95539
398						7	W	593600	594709	biological process unknown	kinase activity					YGR052W	YGR052W||ebi.ac.uk:Database:sgd;A_06_P3272||www.chem.agilent.com:Database:agp		A_06_P3272	1084839	OLIGO	16.086666692	.564444444	77	4	1	398			1677	96	1	.3375407452	1	1	0	0	0	0	0	0	0	0	1	56.52937	77.33439	1	6.963663	21.69403
399						5	C	302325	301945	biological process unknown	molecular function unknown					YER071C	YER071C||ebi.ac.uk:Database:sgd;A_06_P2702||www.chem.agilent.com:Database:agp		A_06_P2702	1081643	OLIGO	16.298333359	.564444444	78	4	1	399			1697	96	1	.2411113622	1	1	0	0	0	0	0	0	0	0	1	89.76221	98.13639	1	8.004239	22.319
400					TNA1	7	W	1012491	1014095	nicotinamide mononucleotide transport	nicotinamide mononucleotide permease activity					YGR260W	YGR260W||ebi.ac.uk:Database:sgd;A_06_P3481||www.chem.agilent.com:Database:agp		A_06_P3481	1083396	OLIGO	16.510000026	.564444444	79	4	1	400			1719	95	1	.04999702716	1	1	0	0	0	0	0	0	0	0	1	3923.3	5014.721	1	63.62033	22.32841
401					LYS20	4	W	133438	134724	lysine biosynthesis via aminoadipic acid	homocitrate synthase activity					YDL182W	YDL182W||ebi.ac.uk:Database:sgd;A_06_P1916||www.chem.agilent.com:Database:agp		A_06_P1916	1085017	OLIGO	16.721666693	.564444444	80	4	1	401			1740	96	1	.05276251766	1	1	0	0	0	0	0	0	0	0	1	9006.217	16451.1	1	91.53272	22.30466
402					TRM10	15	W	142814	143695	tRNA methylation	tRNA (guanine) methyltransferase activity					YOL093W	YOL093W||ebi.ac.uk:Database:sgd;A_06_P6286||www.chem.agilent.com:Database:agp		A_06_P6286	1086290	OLIGO	16.93333336	.564444444	81	4	1	402			1761	96	1	.05122500354	1	1	0	0	0	0	0	0	0	0	1	1499.631	1582.894	1	23.84992	22.4684
403																	E1A_r60_n11||AgilentControlDB;(+)E1A_r60_n11||AgilentControlDB		(+)E1A_R60_N11	1545266	CONTROL	17.145000027	.564444444	82	4	1	403			1782	96	1	.07195830086	1	1	0	0	0	0	0	0	0	0	0	308.4921	823.9017	1	8.9529	22.19011
404					GDI1	5	W	439612	440967	vesicle-mediated transport	Rab GDP-dissociation inhibitor activity					YER136W	YER136W||ebi.ac.uk:Database:sgd;A_06_P2769||www.chem.agilent.com:Database:agp		A_06_P2769	1086736	OLIGO	17.356666694	.564444444	83	4	1	404			1803	95	1	.05141814613	1	1	0	0	0	0	0	0	0	0	0	2236.412	1640.228	1	41.1374	22.6
405					HES1	15	W	781994	783298	steroid biosynthesis	oxysterol binding					YOR237W	YOR237W||ebi.ac.uk:Database:sgd;A_06_P6599||www.chem.agilent.com:Database:agp		A_06_P6599	1085652	OLIGO	17.568333361	.564444444	84	4	1	405			1824	96	1	.1780516418	1	1	0	0	0	0	0	0	0	0	0	176.809	92.95972	1	7.841218	22.64964
406					CDC2	4	W	276872	280165	nucleotide-excision repair*	delta DNA polymerase activity					YDL102W	YDL102W||ebi.ac.uk:Database:sgd;A_06_P1832||www.chem.agilent.com:Database:agp		A_06_P1832	1081461	OLIGO	17.780000028	.564444444	85	4	1	406			1846	96	1	.05103237503	1	1	0	0	0	0	0	0	0	0	1	1661.44	1577.295	1	33.0203	22.22794
407						1	W	74021	74824	biological process unknown	molecular function unknown					YAL037W	YAL037W||ebi.ac.uk:Database:sgd;A_06_P1061||www.chem.agilent.com:Database:agp		A_06_P1061	1084528	OLIGO	17.991666695	.564444444	86	4	1	407			1867	97	1	.1661948354	1	1	0	0	0	0	0	0	0	0	1	154.0147	126.2836	1	7.981939	22.15472
408					NAM2	12	C	884751	882067	Group I intron splicing*	mRNA binding*					YLR382C	YLR382C||ebi.ac.uk:Database:sgd;A_06_P5200||www.chem.agilent.com:Database:agp		A_06_P5200	1082001	OLIGO	18.203333362	.564444444	87	4	1	408			1888	96	1	.06535421152	1	1	0	0	0	0	0	0	0	0	1	528.2199	501.2977	1	16.12994	22.39925
409						9	C	32566	30938	transport	transporter activity					YIL166C	YIL166C||ebi.ac.uk:Database:sgd;A_06_P3965||www.chem.agilent.com:Database:agp		A_06_P3965	1081675	OLIGO	18.415000029	.564444444	88	4	1	409			1909	97	1	.2091507872	1	1	0	0	0	0	0	0	0	0	1	114.1619	104.0298	1	7.096254	22.2594
410						7	W	303516	303839							YGL109W	YGL109W||ebi.ac.uk:Database:sgd;A_06_P3064||www.chem.agilent.com:Database:agp		A_06_P3064	1081360	OLIGO	18.626666696	.564444444	89	4	1	410			1930	95	1	.6877427843	1	1	0	0	0	0	0	0	0	0	0	33.51246	31.12687	1	5.351755	22.27203
411					ISU2	15	C	762084	761614	iron ion homeostasis*	molecular function unknown					YOR226C	YOR226C||ebi.ac.uk:Database:sgd;A_06_P6588||www.chem.agilent.com:Database:agp		A_06_P6588	1080912	OLIGO	18.838333363	.564444444	90	4	1	411			1951	97	1	.07638022606	1	1	0	0	0	0	0	0	0	0	1	346.1307	418.0453	1	11.0857	22.29368
412					STP4	4	C	368211	366739	biological process unknown	molecular function unknown					YDL048C	YDL048C||ebi.ac.uk:Database:sgd;A_06_P1777||www.chem.agilent.com:Database:agp		A_06_P1777	1084424	OLIGO	19.05000003	.564444444	91	4	1	412			1973	96	1	.09466743105	1	1	0	0	0	0	0	0	0	0	0	173.9914	468.9066	1	7.958564	22.0292
413					TYR1	2	C	571195	569837	tyrosine metabolism	prephenate dehydrogenase activity					YBR166C	YBR166C||ebi.ac.uk:Database:sgd;A_06_P1419||www.chem.agilent.com:Database:agp		A_06_P1419	1081537	OLIGO	19.261666697	.564444444	92	4	1	413			1994	97	1	.05524400763	1	1	0	0	0	0	0	0	0	0	1	966.7711	826.867	1	15.67538	22.4
414						8	C	125674	124103	biological process unknown	molecular function unknown					YHR009C	YHR009C||ebi.ac.uk:Database:sgd;A_06_P3579||www.chem.agilent.com:Database:agp		A_06_P3579	1084215	OLIGO	19.473333364	.564444444	93	4	1	414			2015	96	1	.04943543571	1	1	0	0	0	0	0	0	0	0	1	4592.544	4288.825	1	73.81963	22.74254
415					STR2	10	C	667052	665133	sulfur metabolism	cystathionine gamma-synthase activity					YJR130C	YJR130C||ebi.ac.uk:Database:sgd;A_06_P4373||www.chem.agilent.com:Database:agp		A_06_P4373	1085482	OLIGO	19.685000031	.564444444	94	4	1	415			2036	97	1	.05633347414	1	1	0	0	0	0	0	0	0	0	1	806.7869	801.7745	1	17.69713	22.1107
416																	(+)E1A_r60_a20||AgilentControlDB;E1A_r60_a20||AgilentControlDB		(+)E1A_R60_A20	1545259	CONTROL	19.896666698	.564444444	95	4	1	416			2057	95	1	.2938531551	1	1	0	0	0	0	0	0	0	0	0	107.4504	52.50761	1	7.319797	22.04074
417					UFD2	4	C	121593	118708	response to stress*	ubiquitin conjugating enzyme activity					YDL190C	YDL190C||ebi.ac.uk:Database:sgd;A_06_P1925||www.chem.agilent.com:Database:agp		A_06_P1925	1083558	OLIGO	20.108333365	.564444444	96	4	1	417			2079	97	1	.05071408168	1	1	0	0	0	0	0	0	0	0	1	1813.807	1737.319	1	28.22311	22.07197
418					GPI8	4	W	1129581	1130816	attachment of GPI anchor to protein	GPI-anchor transamidase activity					YDR331W	YDR331W||ebi.ac.uk:Database:sgd;A_06_P2322||www.chem.agilent.com:Database:agp		A_06_P2322	1082623	OLIGO	20.320000032	.564444444	97	4	1	418			2100	96	1	.05528402317	1	1	0	0	0	0	0	0	0	0	0	1047.933	810.03	1	20.79355	21.98905
419						1	W	140762	141409							YAL004W	YAL004W||ebi.ac.uk:Database:sgd;A_06_P1027||www.chem.agilent.com:Database:agp		A_06_P1027	1086845	OLIGO	20.531666699	.564444444	98	4	1	419			2121	97	1	.09676751834	1	1	0	0	0	0	0	0	0	0	1	230.2064	308.6106	1	8.872963	22.53309
420						7	C	592446	592090							YGR050C	YGR050C||ebi.ac.uk:Database:sgd;A_06_P3270||www.chem.agilent.com:Database:agp		A_06_P3270	1080771	OLIGO	20.743333366	.564444444	99	4	1	420			2143	95	1	.6159577802	1	1	0	0	0	0	0	0	0	0	1	44.58614	28.76876	1	6.330061	22.23438
421					HSM3	2	C	747798	746356	mismatch repair	molecular function unknown					YBR272C	YBR272C||ebi.ac.uk:Database:sgd;A_06_P1526||www.chem.agilent.com:Database:agp		A_06_P1526	1084355	OLIGO	20.955000033	.564444444	100	4	1	421			2163	97	1	.06338449348	1	1	0	0	0	0	0	0	0	0	0	629.1853	501.0205	1	14.06689	22.43939
422						2	C	90923	90603							YBL070C	YBL070C||ebi.ac.uk:Database:sgd;A_06_P1201||www.chem.agilent.com:Database:agp		A_06_P1201	1086904	OLIGO	21.1666667	.564444444	101	4	1	422			2184	95	1	.6917615448	1	1	0	0	0	0	0	0	0	0	0	32.86144	31.3824	1	6.684345	22.38931
423					PUB1	14	W	602906	604267	mRNA catabolism, nonsense-mediated decay	nucleic acid binding					YNL016W	YNL016W||ebi.ac.uk:Database:sgd;A_06_P5787||www.chem.agilent.com:Database:agp		A_06_P5787	1082148	OLIGO	21.378333367	.564444444	102	4	1	423			2205	97	1	.05013398377	1	1	0	0	0	0	0	0	0	0	1	2278.752	2583.929	1	35.42636	22.17871
424					NUF2	15	W	198941	200296	chromosome segregation*	structural constituent of cytoskeleton					YOL069W	YOL069W||ebi.ac.uk:Database:sgd;A_06_P6261||www.chem.agilent.com:Database:agp		A_06_P6261	1083641	OLIGO	21.590000034	.564444444	103	4	1	424			2227	96	1	.09632764539	1	1	0	0	0	0	0	0	0	0	0	343.2232	211.6819	1	10.19962	22.03462
425					NVJ1	8	W	490746	491711	microautophagy	protein binding					YHR195W	YHR195W||ebi.ac.uk:Database:sgd;A_06_P3773||www.chem.agilent.com:Database:agp		A_06_P3773	1081547	OLIGO	21.801666701	.564444444	104	4	1	425			2248	97	1	.05513301659	1	1	0	0	0	0	0	0	0	0	1	896.1359	876.8625	1	15.96591	22.69549
426					FLO8	5	C	377610	375211	pseudohyphal growth*	specific RNA polymerase II transcription factor activity					YER109C	YER109C||ebi.ac.uk:Database:sgd;A_06_P2741||www.chem.agilent.com:Database:agp		A_06_P2741	1080911	OLIGO	22.013333368	.564444444	105	4	1	426			2269	97	1	.07992961003	1	1	0	0	0	0	0	0	0	0	1	389.1442	319.63	1	10.23142	22.66176
427					DAL7	9	C	414676	413012	allantoin catabolism	malate synthase activity					YIR031C	YIR031C||ebi.ac.uk:Database:sgd;A_06_P4008||www.chem.agilent.com:Database:agp		A_06_P4008	1083212	OLIGO	22.225000035	.564444444	106	4	1	427			2291	97	1	.09545127386	1	1	0	0	0	0	0	0	0	0	0	2680.325	236.4441	1	42.00134	22.00377
428						4	W	734133	734798	peptidyl-glutamine methylation	S-adenosylmethionine-dependent methyltransferase activity*					YDR140W	YDR140W||ebi.ac.uk:Database:sgd;A_06_P2128||www.chem.agilent.com:Database:agp		A_06_P2128	1082252	OLIGO	22.436666702	.564444444	107	4	1	428			2311	96	1	.06261243088	1	1	0	0	0	0	0	0	0	0	1	600.7339	545.734	1	15.83697	21.68635
429					MAL13	7	W	1070299	1071720	regulation of transcription, DNA-dependent*	transcription factor activity					YGR288W	YGR288W||ebi.ac.uk:Database:sgd;A_06_P3510||www.chem.agilent.com:Database:agp		A_06_P3510	1085637	OLIGO	0	.752592592	1	5	1	429			67	114	1	.2052997189	1	1	0	0	0	0	0	0	0	0	1	134.2762	91.25543	1	9.221621	21.39623
430					SBE2	4	W	1178657	1181251	cell wall organization and biogenesis	molecular function unknown					YDR351W	YDR351W||ebi.ac.uk:Database:sgd;A_06_P2342||www.chem.agilent.com:Database:agp		A_06_P2342	1086067	OLIGO	.211666667	.752592592	2	5	1	430			89	115	1	.05347051878	1	1	0	0	0	0	0	0	0	0	1	1090.628	1021.674	1	19.26263	21.47308
431						4	C	1525506	1525078							YDR544C	YDR544C||ebi.ac.uk:Database:sgd;A_06_P2538||www.chem.agilent.com:Database:agp		A_06_P2538	1083139	OLIGO	.423333334	.752592592	3	5	1	431			110	115	1	.6643944205	1	1	0	0	0	0	0	0	0	0	1	35.52623	31.45009	1	5.593531	22.0471
432					BUD8	12	W	834351	836162	pseudohyphal growth*	molecular function unknown					YLR353W	YLR353W||ebi.ac.uk:Database:sgd;A_06_P5170||www.chem.agilent.com:Database:agp		A_06_P5170	1084256	OLIGO	.635000001	.752592592	4	5	1	432			131	116	1	.05540363242	1	1	0	0	0	0	0	0	0	0	1	906.8078	834.7142	1	17.49014	21.79359
433						1	C	57386	57030	biological process unknown	molecular function unknown					YAL046C	YAL046C||ebi.ac.uk:Database:sgd;A_06_P1072||www.chem.agilent.com:Database:agp		A_06_P1072	1086143	OLIGO	.846666668	.752592592	5	5	1	433			153	114	1	.05649787881	1	1	0	0	0	0	0	0	0	0	0	783.6946	1405.524	1	15.11585	21.86282
434					BUD6	12	C	771684	769318	actin filament organization*	cytoskeletal regulatory protein binding					YLR319C	YLR319C||ebi.ac.uk:Database:sgd;A_06_P5136||www.chem.agilent.com:Database:agp		A_06_P5136	1086525	OLIGO	1.058333335	.752592592	6	5	1	434			174	115	1	.0609861646	1	1	0	0	0	0	0	0	0	0	1	659.3437	577.6657	1	14.70182	21.83577
435						11	C	49810	49007	biological process unknown	molecular function unknown					YKL206C	YKL206C||ebi.ac.uk:Database:sgd;A_06_P4618||www.chem.agilent.com:Database:agp		A_06_P4618	1086360	OLIGO	1.270000002	.752592592	7	5	1	435			195	114	1	.05150236826	1	1	0	0	0	0	0	0	0	0	1	1588.454	1395.046	1	31.09982	21.85393
436																	(+)E1A_r60_1||AgilentControlDB;E1A_r60_1||AgilentControlDB		(+)E1A_R60_1	1545263	CONTROL	1.481666669	.752592592	8	5	1	436			216	116	1	.2445288809	1	1	0	0	0	0	0	0	0	0	0	76.67797	110.6364	1	6.181377	22.12782
437					MRS2	15	W	944591	946003	mitochondrial magnesium ion transport*	magnesium ion transporter activity					YOR334W	YOR334W||ebi.ac.uk:Database:sgd;A_06_P6698||www.chem.agilent.com:Database:agp		A_06_P6698	1083664	OLIGO	1.693333336	.752592592	9	5	1	437			237	114	1	.1457759683	1	1	0	0	0	0	0	0	0	0	1	175.3411	148.5683	1	7.413814	21.95203
438					COX10	16	C	225740	224352	protein complex assembly*	protoheme IX farnesyltransferase activity					YPL172C	YPL172C||ebi.ac.uk:Database:sgd;A_06_P6931||www.chem.agilent.com:Database:agp		A_06_P6931	1081425	OLIGO	1.905000003	.752592592	10	5	1	438			258	115	1	.07303032329	1	1	0	0	0	0	0	0	0	0	1	373.3725	455.2632	1	9.864272	21.89007
439					PEX31	7	W	502942	504330	peroxisome organization and biogenesis	molecular function unknown					YGR004W	YGR004W||ebi.ac.uk:Database:sgd;A_06_P3224||www.chem.agilent.com:Database:agp		A_06_P3224	1082387	OLIGO	2.11666667	.752592592	11	5	1	439			280	115	1	.1008525331	1	1	0	0	0	0	0	0	0	0	1	251.2587	251.97	1	9.474432	21.54962
440						1	C	217483	217148							YAR060C	YAR060C||ebi.ac.uk:Database:sgd;A_06_P1119||www.chem.agilent.com:Database:agp		A_06_P1119	1086627	OLIGO	2.328333337	.752592592	12	5	1	440			301	115	1	.1925722467	1	1	0	0	0	0	0	0	0	0	1	138.6529	101.6277	1	7.700805	22.05576
441						11	W	469360	470982	biological process unknown	molecular function unknown					YKR016W	YKR016W||ebi.ac.uk:Database:sgd;A_06_P4653||www.chem.agilent.com:Database:agp		A_06_P4653	1080882	OLIGO	2.540000004	.752592592	13	5	1	441			322	114	1	.05184173764	1	1	0	0	0	0	0	0	0	0	1	1369.22	1318.847	1	22.05246	21.94382
442					VPS53	10	C	390769	388301	Golgi to vacuole transport*	protein binding					YJL029C	YJL029C||ebi.ac.uk:Database:sgd;A_06_P4050||www.chem.agilent.com:Database:agp		A_06_P4050	1085902	OLIGO	2.751666671	.752592592	14	5	1	442			343	115	1	.05650494471	1	1	0	0	0	0	0	0	0	0	0	741.3505	884.0191	1	16.97266	22.10112
443					MNN10	4	W	952794	953975	actin filament organization*	alpha-1,6-mannosyltransferase activity					YDR245W	YDR245W||ebi.ac.uk:Database:sgd;A_06_P2234||www.chem.agilent.com:Database:agp		A_06_P2234	1084345	OLIGO	2.963333338	.752592592	15	5	1	443			364	114	1	.05003324738	1	1	0	0	0	0	0	0	0	0	1	5359.216	4139.863	1	81.53271	21.81455
444						14	W	542303	542821	biological process unknown	molecular function unknown					YNL046W	YNL046W||ebi.ac.uk:Database:sgd;A_06_P5817||www.chem.agilent.com:Database:agp		A_06_P5817	1086698	OLIGO	3.175000005	.752592592	16	5	1	444			385	115	1	.05473861694	1	1	0	0	0	0	0	0	0	0	0	926.2108	1502.547	1	17.08409	21.72797
445					ICE2	9	W	193592	195067	ER organization and biogenesis	molecular function unknown					YIL090W	YIL090W||ebi.ac.uk:Database:sgd;A_06_P3889||www.chem.agilent.com:Database:agp		A_06_P3889	1081562	OLIGO	3.386666672	.752592592	17	5	1	445			407	114	1	.05295591366	1	1	0	0	0	0	0	0	0	0	0	1082.934	1411.605	1	21.46996	22.09091
446					ERV29	7	C	1061596	1060664	ER to Golgi transport	molecular function unknown					YGR284C	YGR284C||ebi.ac.uk:Database:sgd;A_06_P3506||www.chem.agilent.com:Database:agp		A_06_P3506	1084118	OLIGO	3.598333339	.752592592	18	5	1	446			428	115	1	.0497410392	1	1	0	0	0	0	0	0	0	0	1	5426.103	4449.033	1	66.2532	21.94776
447					VAR1	17	W	48901	50097	protein biosynthesis*	structural constituent of ribosome					Q0140	Q0140||ebi.ac.uk:Database:sgd;A_06_P1017||www.chem.agilent.com:Database:agp		A_06_P1017	1084236	OLIGO	3.810000006	.752592592	19	5	1	447			449	114	1	.1307554077	1	1	0	0	0	0	0	0	0	0	1	175.2976	190.7808	1	7.769994	21.77206
448					DIN7	4	C	995528	994236	DNA repair	nuclease activity					YDR263C	YDR263C||ebi.ac.uk:Database:sgd;A_06_P2252||www.chem.agilent.com:Database:agp		A_06_P2252	1085555	OLIGO	4.021666673	.752592592	20	5	1	448			470	115	1	.08438222894	1	1	0	0	0	0	0	0	0	0	0	412.5381	260.3472	1	11.29095	21.92884
449																	(+)E1A_r60_a104||AgilentControlDB;E1A_r60_a104||AgilentControlDB		(+)E1A_R60_A104	1545260	CONTROL	4.23333334	.752592592	21	5	1	449			490	115	1	.6454274379	1	1	0	0	0	0	0	0	0	0	0	38.13636	30.9841	1	5.998496	21.95956
450					TIP20	7	W	230248	232353	retrograde transport, Golgi to ER	molecular function unknown					YGL145W	YGL145W||ebi.ac.uk:Database:sgd;A_06_P3100||www.chem.agilent.com:Database:agp		A_06_P3100	1082764	OLIGO	4.445000007	.752592592	22	5	1	450			512	115	1	.08629573903	1	1	0	0	0	0	0	0	0	0	1	356.4791	275.8646	1	10.18601	21.9635
451						13	C	605519	603867	biological process unknown	molecular function unknown					YMR171C	YMR171C||ebi.ac.uk:Database:sgd;A_06_P5606||www.chem.agilent.com:Database:agp		A_06_P5606	1085890	OLIGO	4.656666674	.752592592	23	5	1	451			534	114	1	.06276379799	1	1	0	0	0	0	0	0	0	0	1	575.7958	559.5166	1	12.63477	21.91367
452					ALG7	2	C	706788	705442	protein amino acid N-linked glycosylation	UDP-N-acetylglucosamine-dolichyl-phosphate N-acetylglucosaminephosphotransferase activity					YBR243C	YBR243C||ebi.ac.uk:Database:sgd;A_06_P1497||www.chem.agilent.com:Database:agp		A_06_P1497	1082776	OLIGO	4.868333341	.752592592	24	5	1	452			555	115	1	.05228203385	1	1	0	0	0	0	0	0	0	0	0	2609.3	4408.588	1	38.23146	22.10037
453						4	C	1461544	1459718	biological process unknown	molecular function unknown					YDR506C	YDR506C||ebi.ac.uk:Database:sgd;A_06_P2499||www.chem.agilent.com:Database:agp		A_06_P2499	1081040	OLIGO	5.080000008	.752592592	25	5	1	453			576	114	1	.07567515073	1	1	0	0	0	0	0	0	0	0	0	334.5228	452.3547	1	12.21771	21.98134
454					COS8	8	W	6400	7545	response to unfolded protein	molecular function unknown					YHL048W	YHL048W||ebi.ac.uk:Database:sgd;A_06_P3566||www.chem.agilent.com:Database:agp		A_06_P3566	1084082	OLIGO	5.291666675	.752592592	26	5	1	454			597	116	1	.06153175091	1	1	0	0	0	0	0	0	0	0	0	514.8373	1019.891	1	10.81323	22.01099
455					MFA2	14	W	352414	352530	signal transduction during conjugation with cellular fusion	mating pheromone activity					YNL145W	YNL145W||ebi.ac.uk:Database:sgd;A_06_P5916||www.chem.agilent.com:Database:agp		A_06_P5916	1086000	OLIGO	5.503333342	.752592592	27	5	1	455			618	115	1	.05223266684	1	1	0	0	0	0	0	0	0	0	0	2883.237	4882.794	1	36.82032	21.94182
456					NIF3	7	C	82291	81425	biological process unknown	molecular function unknown					YGL221C	YGL221C||ebi.ac.uk:Database:sgd;A_06_P3176||www.chem.agilent.com:Database:agp		A_06_P3176	1082142	OLIGO	5.715000009	.752592592	28	5	1	456			640	116	1	.04927037253	1	1	0	0	0	0	0	0	0	0	1	7503.746	7042.429	1	109.0604	21.80935
457						12	W	827520	828026							YLR349W	YLR349W||ebi.ac.uk:Database:sgd;A_06_P5166||www.chem.agilent.com:Database:agp		A_06_P5166	1082312	OLIGO	5.926666676	.752592592	29	5	1	457			660	114	1	.671812984	1	1	0	0	0	0	0	0	0	0	1	37.6631	28.8801	1	6.422167	21.75746
458					COX5B	9	W	155219	155762	mitochondrial electron transport, cytochrome c to oxygen*	cytochrome-c oxidase activity					YIL111W	YIL111W||ebi.ac.uk:Database:sgd;A_06_P3910||www.chem.agilent.com:Database:agp		A_06_P3910	1085590	OLIGO	6.138333343	.752592592	30	5	1	458			682	116	1	.05319495313	1	1	0	0	0	0	0	0	0	0	0	2923.595	1668.566	1	42.13445	22.22022
459					SNF2	15	C	860255	855144	chromatin remodeling	general RNA polymerase II transcription factor activity					YOR290C	YOR290C||ebi.ac.uk:Database:sgd;A_06_P6651||www.chem.agilent.com:Database:agp		A_06_P6651	1082384	OLIGO	6.35000001	.752592592	31	5	1	459			703	114	1	.05290928562	1	1	0	0	0	0	0	0	0	0	1	1119.402	1139.982	1	18.93007	22.21739
460					EXG2	4	C	979203	977515	cell wall organization and biogenesis	glucan 1,3-beta-glucosidase activity					YDR261C	YDR261C||ebi.ac.uk:Database:sgd;A_06_P2250||www.chem.agilent.com:Database:agp		A_06_P2250	1082733	OLIGO	6.561666677	.752592592	32	5	1	460			724	115	1	.05406892724	1	1	0	0	0	0	0	0	0	0	0	929.1806	1257.02	1	18.75115	22.25379
461					PSD1	14	C	317671	316169	phosphatidylcholine biosynthesis	phosphatidylserine decarboxylase activity					YNL169C	YNL169C||ebi.ac.uk:Database:sgd;A_06_P5941||www.chem.agilent.com:Database:agp		A_06_P5941	1081334	OLIGO	6.773333344	.752592592	33	5	1	461			745	114	1	.04985701015	1	1	0	0	0	0	0	0	0	0	1	3959.585	3295.104	1	47.18901	22.46642
462																	(+)E1A_r60_3||AgilentControlDB;E1A_r60_3||AgilentControlDB		(+)E1A_R60_3	1545261	CONTROL	6.985000011	.752592592	34	5	1	462			767	116	1	.6660131929	1	1	0	0	0	0	0	0	0	0	0	32.87678	33.85702	1	5.049682	22.14394
463						2	W	454816	457659	biological process unknown	molecular function unknown					YBR108W	YBR108W||ebi.ac.uk:Database:sgd;A_06_P1360||www.chem.agilent.com:Database:agp		A_06_P1360	1085756	OLIGO	7.196666678	.752592592	35	5	1	463			788	115	1	.170274016	1	1	0	0	0	0	0	0	0	0	1	133.43	138.4664	1	7.781876	22.63296
464					PHO11	1	W	225451	226854	phosphate metabolism	acid phosphatase activity					YAR071W	YAR071W||ebi.ac.uk:Database:sgd;A_06_P1127||www.chem.agilent.com:Database:agp		A_06_P1127	1085164	OLIGO	7.408333345	.752592592	36	5	1	464			809	115	1	.05353593193	1	1	0	0	0	0	0	0	0	0	1	129837.5	66524.18	1	1149.461	22.39051
465						6	W	109804	110178							YFL012W-A	YFL012W-A||ebi.ac.uk:Database:sgd;A_06_P2838||www.chem.agilent.com:Database:agp		A_06_P2838	1082878	OLIGO	7.620000012	.752592592	37	5	1	465			830	114	1	.6998580974	1	1	0	0	0	0	0	0	0	0	0	31.73325	31.7523	1	4.677035	21.94982
466					SFH5	10	W	145078	145962	phospholipid transport	phosphatidylinositol transporter activity					YJL145W	YJL145W||ebi.ac.uk:Database:sgd;A_06_P4166||www.chem.agilent.com:Database:agp		A_06_P4166	1083740	OLIGO	7.831666679	.752592592	38	5	1	466			851	115	1	.05152296064	1	1	0	0	0	0	0	0	0	0	0	3042.825	2037.122	1	51.9332	22.18113
467						16	C	174755	174342							YPL197C	YPL197C||ebi.ac.uk:Database:sgd;A_06_P6957||www.chem.agilent.com:Database:agp		A_06_P6957	1086650	OLIGO	8.043333346	.752592592	39	5	1	467			873	114	1	.07300188165	1	1	0	0	0	0	0	0	0	0	0	312.687	617.6692	1	8.371234	22.83395
468					AI2	17	W	13818	18830	RNA splicing	RNA binding*					Q0055	Q0055||ebi.ac.uk:Database:sgd;A_06_P1005||www.chem.agilent.com:Database:agp		A_06_P1005	1086621	OLIGO	8.255000013	.752592592	40	5	1	468			893	115	1	.05124997665	1	1	0	0	0	0	0	0	0	0	0	2335.651	1727.64	1	37.54504	22.62406
469					SLG1	15	C	342414	341278	cell wall organization and biogenesis*	transmembrane receptor activity					YOR008C	YOR008C||ebi.ac.uk:Database:sgd;A_06_P6368||www.chem.agilent.com:Database:agp		A_06_P6368	1086095	OLIGO	8.46666668	.752592592	41	5	1	469			914	114	1	.05002238539	1	1	0	0	0	0	0	0	0	0	1	3380.346	2796.264	1	40.38905	22.2717
470						12	W	722980	723306							YLR296W	YLR296W||ebi.ac.uk:Database:sgd;A_06_P5112||www.chem.agilent.com:Database:agp		A_06_P5112	1085719	OLIGO	8.678333347	.752592592	42	5	1	470			935	115	1	.6951262687	1	1	0	0	0	0	0	0	0	0	1	34.0521	29.95632	1	4.655723	22.42063
471					WTM1	15	W	770800	772113	regulation of meiosis	transcription corepressor activity					YOR230W	YOR230W||ebi.ac.uk:Database:sgd;A_06_P6592||www.chem.agilent.com:Database:agp		A_06_P6592	1086431	OLIGO	8.890000014	.752592592	43	5	1	471			956	114	1	.04919498762	1	1	0	0	0	0	0	0	0	0	1	12616.17	13323.85	1	134.5123	22.28413
472						10	W	245508	246161	biological process unknown	molecular function unknown					YJL097W	YJL097W||ebi.ac.uk:Database:sgd;A_06_P4119||www.chem.agilent.com:Database:agp		A_06_P4119	1086356	OLIGO	9.101666681	.752592592	44	5	1	472			978	115	1	.05411911094	1	1	0	0	0	0	0	0	0	0	0	918.4502	1131.396	1	14.31858	22.37226
473					FUN12	1	W	76428	79436	translational initiation	GTPase activity*					YAL035W	YAL035W||ebi.ac.uk:Database:sgd;A_06_P1059||www.chem.agilent.com:Database:agp		A_06_P1059	1081880	OLIGO	9.313333348	.752592592	45	5	1	473			999	114	1	.04925747007	1	1	0	0	0	0	0	0	0	0	1	7499.989	7110.433	1	89.08215	22.07778
474					HSL1	11	W	248566	253122	protein amino acid phosphorylation*	protein kinase activity					YKL101W	YKL101W||ebi.ac.uk:Database:sgd;A_06_P4512||www.chem.agilent.com:Database:agp		A_06_P4512	1082807	OLIGO	9.525000015	.752592592	46	5	1	474			1020	115	1	.05101443187	1	1	0	0	0	0	0	0	0	0	1	1730.568	1578.136	1	33.39686	22
475																	(+)E1A_r60_1||AgilentControlDB;E1A_r60_1||AgilentControlDB		(+)E1A_R60_1	1545263	CONTROL	9.736666682	.752592592	47	5	1	475			1042	115	1	.253355205	1	1	0	0	0	0	0	0	0	0	0	74.9291	105.2789	1	7.311968	22.08333
476					VTI1	13	C	659197	658544	vesicle fusion*	v-SNARE activity					YMR197C	YMR197C||ebi.ac.uk:Database:sgd;A_06_P5636||www.chem.agilent.com:Database:agp		A_06_P5636	1085228	OLIGO	9.948333349	.752592592	48	5	1	476			1063	115	1	.05535677098	1	1	0	0	0	0	0	0	0	0	0	1151.83	807.0924	1	21.51539	22.58088
477					ARO4	2	C	717989	716877	aromatic amino acid family biosynthesis	3-deoxy-7-phosphoheptulonate synthase activity					YBR249C	YBR249C||ebi.ac.uk:Database:sgd;A_06_P1503||www.chem.agilent.com:Database:agp		A_06_P1503	1085150	OLIGO	10.160000016	.752592592	49	5	1	477			1084	114	1	.04919480728	1	1	0	0	0	0	0	0	0	0	1	16808.52	15775.4	1	223.8883	22.0369
478						13	C	594472	593366	transport	transporter activity					YMR166C	YMR166C||ebi.ac.uk:Database:sgd;A_06_P5601||www.chem.agilent.com:Database:agp		A_06_P5601	1085264	OLIGO	10.371666683	.752592592	50	5	1	478			1105	115	1	.05864459569	1	1	0	0	0	0	0	0	0	0	0	617.4537	865.9899	1	12.45732	21.91039
479					ATG22	3	C	56527	54941	protein-vacuolar targeting*	molecular function unknown					YCL038C	YCL038C||ebi.ac.uk:Database:sgd;A_06_P1590||www.chem.agilent.com:Database:agp		A_06_P1590	1081307	OLIGO	10.58333335	.752592592	51	5	1	479			1126	115	1	.05091291221	1	1	0	0	0	0	0	0	0	0	0	1799.399	2294.929	1	30.24067	22.26415
480					VHT1	7	C	619862	618081	biotin transport	biotin transporter activity					YGR065C	YGR065C||ebi.ac.uk:Database:sgd;A_06_P3285||www.chem.agilent.com:Database:agp		A_06_P3285	1085539	OLIGO	10.795000017	.752592592	52	5	1	480			1147	115	1	.04964321941	1	1	0	0	0	0	0	0	0	0	1	3163.154	3109.599	1	47.05909	22.07813
481						15	C	281498	280272	biological process unknown	molecular function unknown					YOL022C	YOL022C||ebi.ac.uk:Database:sgd;A_06_P6213||www.chem.agilent.com:Database:agp		A_06_P6213	1086782	OLIGO	11.006666684	.752592592	53	5	1	481			1168	114	1	.05124473456	1	1	0	0	0	0	0	0	0	0	0	1918.101	1545.958	1	27.35707	22.2397
482						15	C	897073	896693							YOR309C	YOR309C||ebi.ac.uk:Database:sgd;A_06_P6672||www.chem.agilent.com:Database:agp		A_06_P6672	1083807	OLIGO	11.218333351	.752592592	54	5	1	482			1190	115	1	.04937295762	1	1	0	0	0	0	0	0	0	0	1	4741.048	4994.265	1	77.37882	21.9304
483					SUB2	4	W	305237	306577	nuclear mRNA splicing, via spliceosome*	protein binding*					YDL084W	YDL084W||ebi.ac.uk:Database:sgd;A_06_P1813||www.chem.agilent.com:Database:agp		A_06_P1813	1084324	OLIGO	11.430000018	.752592592	55	5	1	483			1211	115	1	.04953623956	1	1	0	0	0	0	0	0	0	0	1	22181.14	18245.15	1	360.6544	22.25735
484					NOP14	4	C	190587	188155	processing of 20S pre-rRNA	snoRNA binding					YDL148C	YDL148C||ebi.ac.uk:Database:sgd;A_06_P1881||www.chem.agilent.com:Database:agp		A_06_P1881	1083134	OLIGO	11.641666685	.752592592	56	5	1	484			1232	115	1	.0561732831	1	1	0	0	0	0	0	0	0	0	1	893.0273	765.2279	1	19.29001	22.12132
485					HCA4	10	W	383753	386065	35S primary transcript processing	ATP-dependent RNA helicase activity					YJL033W	YJL033W||ebi.ac.uk:Database:sgd;A_06_P4054||www.chem.agilent.com:Database:agp		A_06_P4054	1083310	OLIGO	11.853333352	.752592592	57	5	1	485			1253	115	1	.05155719301	1	1	0	0	0	0	0	0	0	0	1	1424.532	1413.697	1	24.1945	22.01141
486						10	C	6130	466	biological process unknown	helicase activity					YJL225C	YJL225C||ebi.ac.uk:Database:sgd;A_06_P4246||www.chem.agilent.com:Database:agp		A_06_P4246	1085531	OLIGO	12.065000019	.752592592	58	5	1	486			1274	115	1	.04919246721	1	1	0	0	0	0	0	0	0	0	1	19963.36	18692.33	1	263.9108	22.50929
487					GLT1	4	C	155641	149204	glutamate biosynthesis	glutamate synthase (NADH) activity					YDL171C	YDL171C||ebi.ac.uk:Database:sgd;A_06_P1905||www.chem.agilent.com:Database:agp		A_06_P1905	1085462	OLIGO	12.276666686	.752592592	59	5	1	487			1296	114	1	.0581154957	1	1	0	0	0	0	0	0	0	0	1	31789.31	12008.9	1	442.3079	22.47656
488																	(+)E1A_r60_a104||AgilentControlDB;E1A_r60_a104||AgilentControlDB		(+)E1A_R60_A104	1545260	CONTROL	12.488333353	.752592592	60	5	1	488			1317	116	1	.6566457033	1	1	0	0	0	0	0	0	0	0	0	39.1794	29.02129	1	6.080627	22.16912
489					PTP3	5	C	311195	308409	protein amino acid dephosphorylation*	protein tyrosine phosphatase activity					YER075C	YER075C||ebi.ac.uk:Database:sgd;A_06_P2706||www.chem.agilent.com:Database:agp		A_06_P2706	1085688	OLIGO	12.70000002	.752592592	61	5	1	489			1337	114	1	.05284655573	1	1	0	0	0	0	0	0	0	0	1	1128.106	1151.269	1	21.31282	22.04478
490						16	W	713273	715939	biological process unknown	molecular function unknown					YPR089W	YPR089W||ebi.ac.uk:Database:sgd;A_06_P7136||www.chem.agilent.com:Database:agp		A_06_P7136	1082844	OLIGO	12.911666687	.752592592	62	5	1	490			1358	115	1	.2598814198	1	1	0	0	0	0	0	0	0	0	1	78.86445	95.38385	1	6.536318	22.08727
491						12	W	641959	642264							YLR252W	YLR252W||ebi.ac.uk:Database:sgd;A_06_P5066||www.chem.agilent.com:Database:agp		A_06_P5066	1084950	OLIGO	13.123333354	.752592592	63	5	1	491			1380	115	1	.05464181957	1	1	0	0	0	0	0	0	0	0	0	869.3474	1054.874	1	15.78116	22.36264
492					YIP4	7	W	123596	124303	vesicle-mediated transport	Rab GTPase binding					YGL198W	YGL198W||ebi.ac.uk:Database:sgd;A_06_P3153||www.chem.agilent.com:Database:agp		A_06_P3153	1085193	OLIGO	13.335000021	.752592592	64	5	1	492			1401	116	1	.05000858038	1	1	0	0	0	0	0	0	0	0	1	2958.43	3619.399	1	42.29737	22.42238
493					MPD2	15	C	154744	153911	protein folding	protein disulfide isomerase activity					YOL088C	YOL088C||ebi.ac.uk:Database:sgd;A_06_P6281||www.chem.agilent.com:Database:agp		A_06_P6281	1085225	OLIGO	13.546666688	.752592592	65	5	1	493			1423	114	1	.05212690548	1	1	0	0	0	0	0	0	0	0	1	1423.447	1226.712	1	26.14036	22.14286
494					HRT3	12	C	337266	336232	ubiquitin-dependent protein catabolism	ubiquitin-protein ligase activity					YLR097C	YLR097C||ebi.ac.uk:Database:sgd;A_06_P4909||www.chem.agilent.com:Database:agp		A_06_P4909	1086752	OLIGO	13.758333355	.752592592	66	5	1	494			1444	116	1	.06679314366	1	1	0	0	0	0	0	0	0	0	0	573.3518	432.5477	1	14.18159	22.09225
495					SPE1	11	W	96762	98162	pantothenate biosynthesis*	ornithine decarboxylase activity					YKL184W	YKL184W||ebi.ac.uk:Database:sgd;A_06_P4597||www.chem.agilent.com:Database:agp		A_06_P4597	1084207	OLIGO	13.970000022	.752592592	67	5	1	495			1465	114	1	.05023785972	1	1	0	0	0	0	0	0	0	0	1	2088.188	2198.92	1	36.11805	22.25843
496					SEC15	7	W	59122	61854	cytokinesis*	protein binding					YGL233W	YGL233W||ebi.ac.uk:Database:sgd;A_06_P3189||www.chem.agilent.com:Database:agp		A_06_P3189	1080662	OLIGO	14.181666689	.752592592	68	5	1	496			1486	115	1	.05013230275	1	1	0	0	0	0	0	0	0	0	1	2423.552	2219.518	1	32.65712	21.9963
497						5	C	7553	7230	biological process unknown	molecular function unknown					YEL073C	YEL073C||ebi.ac.uk:Database:sgd;A_06_P2615||www.chem.agilent.com:Database:agp		A_06_P2615	1086463	OLIGO	14.393333356	.752592592	69	5	1	497			1507	114	1	.1983153606	1	1	0	0	0	0	0	0	0	0	1	132.4538	99.99502	1	8.299111	22.19466
498					ADO1	10	W	623494	624516	purine base metabolism	adenosine kinase activity					YJR105W	YJR105W||ebi.ac.uk:Database:sgd;A_06_P4348||www.chem.agilent.com:Database:agp		A_06_P4348	1084911	OLIGO	14.605000023	.752592592	70	5	1	498			1528	116	1	.04919038804	1	1	0	0	0	0	0	0	0	0	1	41489.77	38622.69	1	570.8119	22.28676
499					HXT9	10	W	19497	21200	hexose transport	glucose transporter activity*					YJL219W	YJL219W||ebi.ac.uk:Database:sgd;A_06_P4241||www.chem.agilent.com:Database:agp		A_06_P4241	1083394	OLIGO	14.81666669	.752592592	71	5	1	499			1549	115	1	.1335461861	1	1	0	0	0	0	0	0	0	0	0	122.4349	257.7968	1	7.343389	22.63529
500					APA2	4	C	1497758	1496781	nucleotide metabolism	bis(5'-nucleosyl)-tetraphosphatase activity*					YDR530C	YDR530C||ebi.ac.uk:Database:sgd;A_06_P2524||www.chem.agilent.com:Database:agp		A_06_P2524	1085093	OLIGO	15.028333357	.752592592	72	5	1	500			1571	115	1	.05308493217	1	1	0	0	0	0	0	0	0	0	0	1051.628	1312.764	1	15.98414	22.22008
501																	E1A_r60_a135||AgilentControlDB;(+)E1A_r60_a135||AgilentControlDB		(+)E1A_R60_A135	1545258	CONTROL	15.240000024	.752592592	73	5	1	501			1592	115	1	.6989040804	1	1	0	0	0	0	0	0	0	0	0	36.56436	27.44875	1	6.052764	22.17424
502						3	C	79295	78948							YCL023C	YCL023C||ebi.ac.uk:Database:sgd;A_06_P1574||www.chem.agilent.com:Database:agp		A_06_P1574	1084038	OLIGO	15.451666691	.752592592	74	5	1	502			1613	115	1	.5477626609	1	1	0	0	0	0	0	0	0	0	1	39.71977	41.53474	1	6.907596	22.13755
503					ASP3-2	12	C	474058	472970	asparagine catabolism*	asparaginase activity					YLR157C	YLR157C||ebi.ac.uk:Database:sgd;A_06_P4971||www.chem.agilent.com:Database:agp		A_06_P4971	1086847	OLIGO	15.663333358	.752592592	75	5	1	503			1634	114	1	.05613081732	1	1	0	0	0	0	0	0	0	0	1	78423.19	33434.9	1	1187.2	22.31203
504					SUI2	10	W	450934	451848	translational initiation	translation initiation factor activity					YJR007W	YJR007W||ebi.ac.uk:Database:sgd;A_06_P4253||www.chem.agilent.com:Database:agp		A_06_P4253	1086852	OLIGO	15.875000025	.752592592	76	5	1	504			1656	115	1	.05030724781	1	1	0	0	0	0	0	0	0	0	1	2482.196	2128.267	1	42.18648	22.30147
505					SAH1	5	C	237118	235769	methionine metabolism*	adenosylhomocysteinase activity					YER043C	YER043C||ebi.ac.uk:Database:sgd;A_06_P2668||www.chem.agilent.com:Database:agp		A_06_P2668	1081275	OLIGO	16.086666692	.752592592	77	5	1	505			1676	114	1	.04914743306	1	1	0	0	0	0	0	0	0	0	1	35133.75	34138.29	1	470.1119	22.43956
506						16	C	656549	655137	biological process unknown	molecular function unknown					YPR045C	YPR045C||ebi.ac.uk:Database:sgd;A_06_P7091||www.chem.agilent.com:Database:agp		A_06_P7091	1081451	OLIGO	16.298333359	.752592592	78	5	1	506			1698	116	1	.0542388053	1	1	0	0	0	0	0	0	0	0	1	1020.655	927.4554	1	19.76298	22.35636
507					MAK5	2	W	528311	530632	rRNA processing*	ATP-dependent RNA helicase activity					YBR142W	YBR142W||ebi.ac.uk:Database:sgd;A_06_P1394||www.chem.agilent.com:Database:agp		A_06_P1394	1082080	OLIGO	16.510000026	.752592592	79	5	1	507			1719	114	1	.06118481264	1	1	0	0	0	0	0	0	0	0	1	612.5509	603.1859	1	13.2309	22.31273
508					RED1	12	W	670342	672825	synaptonemal complex formation	molecular function unknown					YLR263W	YLR263W||ebi.ac.uk:Database:sgd;A_06_P5078||www.chem.agilent.com:Database:agp		A_06_P5078	1083060	OLIGO	16.721666693	.752592592	80	5	1	508			1740	116	1	.1271911595	1	1	0	0	0	0	0	1	0	0	0	258.0824	137.787	1	7.722783	22.15985
509					FUN26	1	C	110431	108878	nucleoside transport	nucleoside transporter activity					YAL022C	YAL022C||ebi.ac.uk:Database:sgd;A_06_P1044||www.chem.agilent.com:Database:agp		A_06_P1044	1083405	OLIGO	16.93333336	.752592592	81	5	1	509			1761	114	1	.04958008992	1	1	0	0	0	0	0	0	0	0	1	4567.704	5327.352	1	73.87444	22.47744
510					MTR3	7	C	806026	805274	35S primary transcript processing*	3'-5'-exoribonuclease activity					YGR158C	YGR158C||ebi.ac.uk:Database:sgd;A_06_P3379||www.chem.agilent.com:Database:agp		A_06_P3379	1086769	OLIGO	17.145000027	.752592592	82	5	1	510			1782	115	1	.07874813975	1	1	0	0	0	0	0	0	0	0	1	351.0022	369.6289	1	10.91087	22.17037
511						16	C	84196	82625	biological process unknown	molecular function unknown					YPL247C	YPL247C||ebi.ac.uk:Database:sgd;A_06_P7007||www.chem.agilent.com:Database:agp		A_06_P7007	1084787	OLIGO	17.356666694	.752592592	83	5	1	511			1803	114	1	.05396156708	1	1	0	0	0	0	0	0	0	0	0	936.1808	1213.45	1	17.22873	22.63534
512					RSC4	11	W	451844	453721	chromatin remodeling	molecular function unknown					YKR008W	YKR008W||ebi.ac.uk:Database:sgd;A_06_P4645||www.chem.agilent.com:Database:agp		A_06_P4645	1080980	OLIGO	17.568333361	.752592592	84	5	1	512			1824	115	1	.06095075156	1	1	0	0	0	0	0	0	0	0	0	703.7015	557.4899	1	15.90754	22.63121
513						3	W	252841	254169	biological process unknown	phosphoprotein phosphatase activity					YCR079W	YCR079W||ebi.ac.uk:Database:sgd;A_06_P1699||www.chem.agilent.com:Database:agp		A_06_P1699	1080637	OLIGO	17.780000028	.752592592	85	5	1	513			1846	115	1	.0542361239	1	1	0	0	0	0	0	0	0	0	1	1012.272	931.6978	1	23.87027	22.10072
514																	(+)E1A_r60_1||AgilentControlDB;E1A_r60_1||AgilentControlDB		(+)E1A_R60_1	1545263	CONTROL	17.991666695	.752592592	86	5	1	514			1867	116	1	.2416320501	1	1	0	0	0	0	0	0	0	0	0	79.9516	109.0527	1	7.703747	22.19217
515					BTS1	16	C	423889	422882	terpenoid biosynthesis	farnesyltranstransferase activity					YPL069C	YPL069C||ebi.ac.uk:Database:sgd;A_06_P6828||www.chem.agilent.com:Database:agp		A_06_P6828	1085663	OLIGO	18.203333362	.752592592	87	5	1	515			1888	115	1	.1146003359	1	1	0	0	0	0	0	0	0	0	1	223.8976	204.643	1	7.991302	22.24436
516						8	W	69704	70066	biological process unknown	molecular function unknown					YHL018W	YHL018W||ebi.ac.uk:Database:sgd;A_06_P3536||www.chem.agilent.com:Database:agp		A_06_P3536	1081465	OLIGO	18.415000029	.752592592	88	5	1	516			1910	116	1	.5670873535	1	1	0	0	0	0	0	0	0	0	1	50.04059	30.12047	1	5.039099	22.2554
517					RBA50	4	W	1491084	1492403	transcription from RNA polymerase II promoter	DNA-directed RNA polymerase activity					YDR527W	YDR527W||ebi.ac.uk:Database:sgd;A_06_P2521||www.chem.agilent.com:Database:agp		A_06_P2521	1084582	OLIGO	18.626666696	.752592592	89	5	1	517			1931	114	1	.06154305951	1	1	0	0	0	0	0	0	0	0	0	535.4657	701.1404	1	10.87085	22.17204
518					NUP42	4	C	844856	843564	mRNA-nucleus export*	structural molecule activity					YDR192C	YDR192C||ebi.ac.uk:Database:sgd;A_06_P2181||www.chem.agilent.com:Database:agp		A_06_P2181	1083509	OLIGO	18.838333363	.752592592	90	5	1	518			1952	116	1	.06607098579	1	1	0	0	0	0	0	1	0	0	1	515.8917	488.5111	1	13.08721	22.38971
519					ODC1	16	C	299502	298570	mitochondrial transport	intracellular transporter activity*					YPL134C	YPL134C||ebi.ac.uk:Database:sgd;A_06_P6893||www.chem.agilent.com:Database:agp		A_06_P6893	1082322	OLIGO	19.05000003	.752592592	91	5	1	519			1973	115	1	.05107567275	1	1	0	0	0	0	0	0	0	0	0	1687.007	2153.468	1	37.40883	22.33846
520						15	W	181056	181454							YOL079W	YOL079W||ebi.ac.uk:Database:sgd;A_06_P6271||www.chem.agilent.com:Database:agp		A_06_P6271	1080753	OLIGO	19.261666697	.752592592	92	5	1	520			1994	116	1	.5593365112	1	1	0	0	0	0	0	0	0	0	1	38.0102	41.59104	1	5.12574	22.89925
521						4	C	407203	405341	biological process unknown	protein kinase activity					YDL025C	YDL025C||ebi.ac.uk:Database:sgd;A_06_P1753||www.chem.agilent.com:Database:agp		A_06_P1753	1084867	OLIGO	19.473333364	.752592592	93	5	1	521			2015	114	1	.05417220338	1	1	0	0	0	0	0	0	0	0	0	914.1366	1109.935	1	19.4443	22.26538
522					PET8	14	C	625829	624975	S-adenosylmethionine transport	S-adenosylmethionine transporter activity					YNL003C	YNL003C||ebi.ac.uk:Database:sgd;A_06_P5774||www.chem.agilent.com:Database:agp		A_06_P5774	1082821	OLIGO	19.685000031	.752592592	94	5	1	522			2036	116	1	.05063032947	1	1	0	0	0	0	0	0	0	0	1	1782.728	1946.43	1	34.19991	22.7786
523						12	C	712060	710993	biological process unknown	molecular function unknown					YLR287C	YLR287C||ebi.ac.uk:Database:sgd;A_06_P5102||www.chem.agilent.com:Database:agp		A_06_P5102	1082957	OLIGO	19.896666698	.752592592	95	5	1	523			2057	114	1	.06043121841	1	1	0	0	0	0	0	0	0	0	0	724.4488	571.3258	1	14.30221	22.48936
524					SFT2	2	W	24098	24745	Golgi to endosome transport	molecular function unknown					YBL102W	YBL102W||ebi.ac.uk:Database:sgd;A_06_P1235||www.chem.agilent.com:Database:agp		A_06_P1235	1086403	OLIGO	20.108333365	.752592592	96	5	1	524			2079	115	1	.04935532972	1	1	0	0	0	0	0	0	0	0	1	8015.61	9055.18	1	119.0095	22.24125
525					PEX6	14	C	22633	19541	peroxisome organization and biogenesis	ATPase activity					YNL329C	YNL329C||ebi.ac.uk:Database:sgd;A_06_P6101||www.chem.agilent.com:Database:agp		A_06_P6101	1084808	OLIGO	20.320000032	.752592592	97	5	1	525			2100	115	1	.0567444382	1	1	0	0	0	0	0	0	0	0	1	734.0182	852.7923	1	14.26176	22.1194
526					PSO2	13	C	544962	542977	DNA repair*	damaged DNA binding*					YMR137C	YMR137C||ebi.ac.uk:Database:sgd;A_06_P5569||www.chem.agilent.com:Database:agp		A_06_P5569	1083835	OLIGO	20.531666699	.752592592	98	5	1	526			2121	116	1	.08316510607	1	1	0	0	0	0	0	0	0	0	1	334.7865	325.8481	1	8.849136	22.64413
527																	E1A_r60_n9||AgilentControlDB;(+)E1A_r60_n9||AgilentControlDB		(+)E1A_R60_N9	1545267	CONTROL	20.743333366	.752592592	99	5	1	527			2143	114	1	.5297929061	1	1	0	0	0	0	0	0	0	0	0	61.76827	27.07244	1	6.390729	21.95652
528						15	C	408788	408357							YOR041C	YOR041C||ebi.ac.uk:Database:sgd;A_06_P6403||www.chem.agilent.com:Database:agp		A_06_P6403	1081479	OLIGO	20.955000033	.752592592	100	5	1	528			2164	115	1	.6904648469	1	1	0	0	0	0	0	0	0	0	0	30.62142	33.78465	1	4.450977	22.47692
529						16	W	527544	528689	biological process unknown	molecular function unknown					YPL014W	YPL014W||ebi.ac.uk:Database:sgd;A_06_P6773||www.chem.agilent.com:Database:agp		A_06_P6773	1083607	OLIGO	21.1666667	.752592592	101	5	1	529			2184	115	1	.2539693809	1	1	0	0	0	0	0	0	0	0	1	80.42025	98.09637	1	6.354147	22.64855
530					CSM4	16	W	171483	171953	meiotic chromosome segregation	molecular function unknown					YPL200W	YPL200W||ebi.ac.uk:Database:sgd;A_06_P6960||www.chem.agilent.com:Database:agp		A_06_P6960	1085344	OLIGO	21.378333367	.752592592	102	5	1	530			2205	115	1	.7196130001	1	1	0	0	0	0	0	0	0	0	0	30.20924	31.53481	1	5.222178	22.43609
531					RPC31	14	C	348521	347766	transcription from RNA polymerase III promoter	DNA-directed RNA polymerase activity					YNL151C	YNL151C||ebi.ac.uk:Database:sgd;A_06_P5922||www.chem.agilent.com:Database:agp		A_06_P5922	1085272	OLIGO	21.590000034	.752592592	103	5	1	531			2227	114	1	.05829054007	1	1	0	0	0	0	0	0	0	0	1	759.7781	667.6634	1	14.98096	22.49091
532					SDL1	9	W	29416	30048	biological process unknown*	molecular function unknown*					YIL167W	YIL167W||ebi.ac.uk:Database:sgd;A_06_P3966||www.chem.agilent.com:Database:agp		A_06_P3966	1082254	OLIGO	21.801666701	.752592592	104	5	1	532			2248	116	1	.1446305684	1	1	0	0	0	0	0	0	0	0	1	179.517	147.6794	1	7.989484	22.96617
533					RPF1	8	W	281496	282383	ribosomal large subunit assembly and maintenance*	rRNA primary transcript binding					YHR088W	YHR088W||ebi.ac.uk:Database:sgd;A_06_P3663||www.chem.agilent.com:Database:agp		A_06_P3663	1084706	OLIGO	22.013333368	.752592592	105	5	1	533			2269	115	1	.05542574589	1	1	0	0	0	0	0	0	0	0	1	913.9534	828.4459	1	15.58248	22.82836
534					DUS3	12	C	924447	922618	tRNA modification	tRNA dihydrouridine synthase activity					YLR401C	YLR401C||ebi.ac.uk:Database:sgd;A_06_P5219||www.chem.agilent.com:Database:agp		A_06_P5219	1081407	OLIGO	22.225000035	.752592592	106	5	1	534			2290	115	1	.05770151377	1	1	0	0	0	0	0	0	0	0	0	656.4068	968.7677	1	16.63205	22.26792
535						9	C	34077	33718	biological process unknown	molecular function unknown					YIL165C	YIL165C||ebi.ac.uk:Database:sgd;A_06_P3964||www.chem.agilent.com:Database:agp		A_06_P3964	1083354	OLIGO	22.436666702	.752592592	107	5	1	535			2312	115	1	.05720563825	1	1	0	0	0	0	0	0	0	0	0	4833.503	1977.034	1	74.26598	21.84815
536						9	C	9155	8793	biological process unknown	molecular function unknown					YIL176C	YIL176C||ebi.ac.uk:Database:sgd;A_06_P3975||www.chem.agilent.com:Database:agp		A_06_P3975	1080636	OLIGO	0	.94074074	1	6	1	536			67	133	1	.05758579316	1	1	0	0	0	0	0	0	0	0	0	662.2259	977.1993	1	14.26947	21.38783
537					PRE8	13	C	86739	85987	ubiquitin-dependent protein catabolism	endopeptidase activity					YML092C	YML092C||ebi.ac.uk:Database:sgd;A_06_P5382||www.chem.agilent.com:Database:agp		A_06_P5382	1085559	OLIGO	.211666667	.94074074	2	6	1	537			89	134	1	.05178794144	1	1	0	0	0	0	0	0	0	0	0	1482.535	2057.636	1	24.09959	21.95652
538					GPM1	11	C	164390	163647	glycolysis*	phosphoglycerate mutase activity					YKL152C	YKL152C||ebi.ac.uk:Database:sgd;A_06_P4564||www.chem.agilent.com:Database:agp		A_06_P4564	1084906	OLIGO	.423333334	.94074074	3	6	1	538			110	133	1	.04914161254	1	1	0	0	0	0	0	1	0	0	1	274602.9	267649.6	1	2653.941	22.14902
539					SDH2	12	C	53930	53130	tricarboxylic acid cycle*	succinate dehydrogenase (ubiquinone) activity					YLL041C	YLL041C||ebi.ac.uk:Database:sgd;A_06_P4786||www.chem.agilent.com:Database:agp		A_06_P4786	1081164	OLIGO	.635000001	.94074074	4	6	1	539			132	134	1	.05294171557	1	1	0	0	0	0	0	0	0	0	0	2190.222	3888.356	1	30.56711	21.97445
540					IML2	10	W	281101	283296	biological process unknown	molecular function unknown					YJL082W	YJL082W||ebi.ac.uk:Database:sgd;A_06_P4104||www.chem.agilent.com:Database:agp		A_06_P4104	1083239	OLIGO	.846666668	.94074074	5	6	1	540			153	134	1	.05072945602	1	1	0	0	0	0	0	0	0	0	1	1912.394	1725.911	1	30.99483	22.07581
541					JEN1	11	W	22234	24084	lactate transport	lactate transporter activity					YKL217W	YKL217W||ebi.ac.uk:Database:sgd;A_06_P4629||www.chem.agilent.com:Database:agp		A_06_P4629	1080916	OLIGO	1.058333335	.94074074	6	6	1	541			174	134	1	.06819043243	1	1	0	0	0	0	0	0	0	0	0	373.071	685.5887	1	10.56233	21.62595
542					MSS4	4	W	868219	870558	sporulation (sensu Fungi)*	1-phosphatidylinositol-4-phosphate 5-kinase activity					YDR208W	YDR208W||ebi.ac.uk:Database:sgd;A_06_P2197||www.chem.agilent.com:Database:agp		A_06_P2197	1082214	OLIGO	1.270000002	.94074074	7	6	1	542			195	133	1	.05247259978	1	1	0	0	0	0	0	0	0	0	0	1371.745	1154.674	1	17.90542	21.74908
543						10	C	392165	391749	biological process unknown	molecular function unknown					YJL027C	YJL027C||ebi.ac.uk:Database:sgd;A_06_P4048||www.chem.agilent.com:Database:agp		A_06_P4048	1085917	OLIGO	1.481666669	.94074074	8	6	1	543			215	134	1	.6757391343	1	1	0	0	0	0	0	0	0	0	0	35.90995	30.03083	1	5.995803	22.15242
544					CTI6	16	W	203420	204940	positive regulation of transcription	transcription factor binding					YPL181W	YPL181W||ebi.ac.uk:Database:sgd;A_06_P6940||www.chem.agilent.com:Database:agp		A_06_P6940	1086719	OLIGO	1.693333336	.94074074	9	6	1	544			237	133	1	.05728843418	1	1	0	0	0	0	0	0	0	0	0	947.4023	679.1945	1	15.65638	22.06934
545					RPS5	10	W	651816	652493	protein biosynthesis	structural constituent of ribosome					YJR123W	YJR123W||ebi.ac.uk:Database:sgd;A_06_P4366||www.chem.agilent.com:Database:agp		A_06_P4366	1086619	OLIGO	1.905000003	.94074074	10	6	1	545			259	135	1	.04914117533	1	1	0	0	0	0	0	0	0	0	1	133015.3	129814.1	1	1587.53	22.30292
546					FMT1	2	W	202059	203264	translational initiation*	methionyl-tRNA formyltransferase activity					YBL013W	YBL013W||ebi.ac.uk:Database:sgd;A_06_P1142||www.chem.agilent.com:Database:agp		A_06_P1142	1086079	OLIGO	2.11666667	.94074074	11	6	1	546			279	133	1	.6904168449	1	1	0	0	0	0	0	0	0	0	0	34.12918	30.30557	1	5.47959	22.12222
547						4	W	622107	624716	membrane organization and biogenesis	molecular function unknown					YDR089W	YDR089W||ebi.ac.uk:Database:sgd;A_06_P2077||www.chem.agilent.com:Database:agp		A_06_P2077	1083869	OLIGO	2.328333337	.94074074	12	6	1	547			301	134	1	.0522198967	1	1	0	0	0	0	0	0	0	0	0	2646.634	1686.797	1	45.04594	21.84701
548																	EQC||AgilentControlDB;(+)eQC-39||AgilentControlDB		(+)EQC-39	1081607	CONTROL	2.540000004	.94074074	13	6	1	548			321	134	1	.7112345613	1	1	0	0	0	0	0	0	0	0	0	28.98396	33.59603	1	4.520464	22.08015
549					KAP95	12	C	826412	823827	protein-nucleus import	protein carrier activity					YLR347C	YLR347C||ebi.ac.uk:Database:sgd;A_06_P5164||www.chem.agilent.com:Database:agp		A_06_P5164	1085842	OLIGO	2.751666671	.94074074	14	6	1	549			343	134	1	.05213681151	1	1	0	0	0	0	0	0	0	0	0	1313.531	1791.591	1	25.14592	21.78652
550					SOR2	4	C	9756	8683	hexose metabolism	oxidoreductase activity, acting on the CH-OH group of donors, NAD or NADP as acceptor					YDL246C	YDL246C||ebi.ac.uk:Database:sgd;A_06_P1982||www.chem.agilent.com:Database:agp		A_06_P1982	1086128	OLIGO	2.963333338	.94074074	15	6	1	550			364	134	1	.6642099605	0	0	0	0	0	0	0	0	0	0	0	37.34496	29.8496	1	5.400435	22.20149
551						8	C	32754	27976	transport	ATPase activity, coupled to transmembrane movement of substances					YHL035C	YHL035C||ebi.ac.uk:Database:sgd;A_06_P3553||www.chem.agilent.com:Database:agp		A_06_P3553	1084312	OLIGO	3.175000005	.94074074	16	6	1	551			386	134	1	.05477051725	1	1	0	0	0	0	0	0	0	0	0	3170.873	1578.947	1	52.83763	22.16917
552					CTM1	8	W	330312	332069	protein modification	[cytochrome c]-lysine N-methyltransferase activity					YHR109W	YHR109W||ebi.ac.uk:Database:sgd;A_06_P3684||www.chem.agilent.com:Database:agp		A_06_P3684	1086838	OLIGO	3.386666672	.94074074	17	6	1	552			407	133	1	.07097020792	1	1	0	0	0	0	0	0	0	0	0	361.9525	545.3938	1	10.27264	22.12364
553					RPL3	15	W	444687	445850	protein biosynthesis*	structural constituent of ribosome					YOR063W	YOR063W||ebi.ac.uk:Database:sgd;A_06_P6425||www.chem.agilent.com:Database:agp		A_06_P6425	1082105	OLIGO	3.598333339	.94074074	18	6	1	553			428	134	1	.04913848941	1	1	0	0	0	0	0	0	0	0	1	41765.31	42145.09	1	394.8039	22.03759
554					PRP40	11	W	417953	419704	nuclear mRNA splicing, via spliceosome	RNA binding					YKL012W	YKL012W||ebi.ac.uk:Database:sgd;A_06_P4419||www.chem.agilent.com:Database:agp		A_06_P4419	1081004	OLIGO	3.810000006	.94074074	19	6	1	554			449	133	1	.05959622977	1	1	0	0	0	0	0	0	0	0	1	694.2769	627.0648	1	15.23448	22.21612
555					PDC1	12	C	234082	232391	pyruvate metabolism*	pyruvate decarboxylase activity					YLR044C	YLR044C||ebi.ac.uk:Database:sgd;A_06_P4856||www.chem.agilent.com:Database:agp		A_06_P4856	1081771	OLIGO	4.021666673	.94074074	20	6	1	555			470	134	1	.04952738662	1	1	0	0	0	0	0	1	0	0	1	280840.1	341708.9	1	1010.823	22.47674
556						14	W	38641	39081							YNL319W	YNL319W||ebi.ac.uk:Database:sgd;A_06_P6091||www.chem.agilent.com:Database:agp		A_06_P6091	1083464	OLIGO	4.23333334	.94074074	21	6	1	556			491	133	1	.6134295348	1	1	0	0	0	0	0	0	0	0	0	43.00117	30.24233	1	6.506857	22.18819
557					TLG2	15	C	292074	290881	vesicle fusion	v-SNARE activity*					YOL018C	YOL018C||ebi.ac.uk:Database:sgd;A_06_P6209||www.chem.agilent.com:Database:agp		A_06_P6209	1082419	OLIGO	4.445000007	.94074074	22	6	1	557			512	134	1	.05797394607	1	1	0	0	0	0	0	0	0	0	0	808.0875	666.2841	1	19.27418	22.13718
558						11	W	291098	292276	biological process unknown	molecular function unknown					YKL077W	YKL077W||ebi.ac.uk:Database:sgd;A_06_P4487||www.chem.agilent.com:Database:agp		A_06_P4487	1086080	OLIGO	4.656666674	.94074074	23	6	1	558			534	133	1	.04978898092	1	1	0	0	0	0	0	0	0	0	1	3458.695	3027.072	1	65.89604	21.93907
559					REV7	9	C	88716	87979	DNA repair*	zeta DNA polymerase activity					YIL139C	YIL139C||ebi.ac.uk:Database:sgd;A_06_P3938||www.chem.agilent.com:Database:agp		A_06_P3938	1084367	OLIGO	4.868333341	.94074074	24	6	1	559			555	134	1	.07633973901	1	1	0	0	0	0	0	0	0	0	1	376.0418	382.6061	1	11.35417	22.16974
560					SEC27	7	W	249874	252743	ER to Golgi transport*	molecular function unknown					YGL137W	YGL137W||ebi.ac.uk:Database:sgd;A_06_P3092||www.chem.agilent.com:Database:agp		A_06_P3092	1083547	OLIGO	5.080000008	.94074074	25	6	1	560			576	133	1	.04989389552	1	1	0	0	0	0	0	0	0	0	1	4167.633	5240.171	1	53.09734	22.02206
561																	EQC||AgilentControlDB;(+)eQC-39||AgilentControlDB		(+)EQC-39	1081607	CONTROL	5.291666675	.94074074	26	6	1	561			597	134	1	.6716805623	1	1	0	0	0	0	0	0	0	0	0	31.85557	34.33876	1	4.956724	21.79924
562						4	C	943414	941051	biological process unknown	molecular function unknown					YDR239C	YDR239C||ebi.ac.uk:Database:sgd;A_06_P2228||www.chem.agilent.com:Database:agp		A_06_P2228	1083803	OLIGO	5.503333342	.94074074	27	6	1	562			618	133	1	.06221984306	1	1	0	0	0	0	0	0	0	0	0	519.2174	679.028	1	13.72037	21.94275
563					MNL1	8	W	506318	508708	ER-associated protein catabolism	carbohydrate binding					YHR204W	YHR204W||ebi.ac.uk:Database:sgd;A_06_P3782||www.chem.agilent.com:Database:agp		A_06_P3782	1086188	OLIGO	5.715000009	.94074074	28	6	1	563			639	134	1	.05417391469	1	1	0	0	0	0	0	0	0	0	0	911.828	1143.114	1	17.2055	21.70144
564					ESF2	14	C	724305	723355	35S primary transcript processing	transcription regulator activity					YNR054C	YNR054C||ebi.ac.uk:Database:sgd;A_06_P6167||www.chem.agilent.com:Database:agp		A_06_P6167	1081312	OLIGO	5.926666676	.94074074	29	6	1	564			661	133	1	.05512036792	1	1	0	0	0	0	0	0	0	0	1	863.9281	915.6643	1	15.32333	21.89455
565						7	C	797873	796803	biological process unknown	molecular function unknown					YGR154C	YGR154C||ebi.ac.uk:Database:sgd;A_06_P3375||www.chem.agilent.com:Database:agp		A_06_P3375	1081605	OLIGO	6.138333343	.94074074	30	6	1	565			682	134	1	.08086336693	1	1	0	0	0	0	0	0	0	0	1	381.6635	313.8927	1	12.48761	22.34962
566					SAS5	15	C	745281	744535	chromatin silencing at telomere	acetyltransferase activity*					YOR213C	YOR213C||ebi.ac.uk:Database:sgd;A_06_P6575||www.chem.agilent.com:Database:agp		A_06_P6575	1085451	OLIGO	6.35000001	.94074074	31	6	1	566			703	133	1	.05161046742	1	1	0	0	0	0	0	0	0	0	0	1743.805	1398.842	1	26.78765	22.75655
567						7	W	90011	90499							YGL214W	YGL214W||ebi.ac.uk:Database:sgd;A_06_P3169||www.chem.agilent.com:Database:agp		A_06_P3169	1083773	OLIGO	6.561666677	.94074074	32	6	1	567			723	134	1	.5423648145	1	1	0	0	0	0	0	0	0	0	1	45.18376	37.14023	1	5.60414	22.46038
568					REH1	12	C	897672	896374	biological process unknown*	molecular function unknown					YLR387C	YLR387C||ebi.ac.uk:Database:sgd;A_06_P5205||www.chem.agilent.com:Database:agp		A_06_P5205	1083512	OLIGO	6.773333344	.94074074	33	6	1	568			745	133	1	.04989726799	1	1	0	0	0	0	0	0	0	0	1	4555.213	3675.916	1	80.43806	22.25188
569						12	C	541575	540811	biological process unknown	molecular function unknown					YLR194C	YLR194C||ebi.ac.uk:Database:sgd;A_06_P5008||www.chem.agilent.com:Database:agp		A_06_P5008	1086758	OLIGO	6.985000011	.94074074	34	6	1	569			766	134	1	.05258368761	1	1	0	0	0	0	0	0	0	0	0	1784.638	2965.205	1	26.08358	22.01145
570					TRM12	13	W	260221	261609	tRNA methylation	S-adenosylmethionine-dependent methyltransferase activity					YML005W	YML005W||ebi.ac.uk:Database:sgd;A_06_P5291||www.chem.agilent.com:Database:agp		A_06_P5291	1081315	OLIGO	7.196666678	.94074074	35	6	1	570			787	133	1	.0757241805	1	1	0	0	0	0	0	0	0	0	1	387.8113	381.4535	1	14.52855	22.77037
571					AYR1	9	W	126204	127097	phosphatidic acid biosynthesis	acylglycerone-phosphate reductase activity					YIL124W	YIL124W||ebi.ac.uk:Database:sgd;A_06_P3923||www.chem.agilent.com:Database:agp		A_06_P3923	1082318	OLIGO	7.408333345	.94074074	36	6	1	571			809	134	1	.05076245959	1	1	0	0	0	0	0	0	0	0	0	4003.27	2835.645	1	48.63162	22.18705
572					ELF1	11	W	153274	153711	cell growth	molecular function unknown					YKL160W	YKL160W||ebi.ac.uk:Database:sgd;A_06_P4571||www.chem.agilent.com:Database:agp		A_06_P4571	1086077	OLIGO	7.620000012	.94074074	37	6	1	572			830	133	1	.05292118886	1	1	0	0	0	0	0	0	0	0	0	1234.14	1878.017	1	21.43223	22.02564
573					HXT17	14	W	772655	774349	hexose transport	glucose transporter activity*					YNR072W	YNR072W||ebi.ac.uk:Database:sgd;A_06_P6185||www.chem.agilent.com:Database:agp		A_06_P6185	1082728	OLIGO	7.831666679	.94074074	38	6	1	573			851	134	1	.06021788385	1	1	0	0	0	0	0	0	0	0	0	551.7106	888.9416	1	9.602146	22.21111
574																	EQC||AgilentControlDB;(+)eQC-39||AgilentControlDB		(+)EQC-39	1081607	CONTROL	8.043333346	.94074074	39	6	1	574			872	134	1	.6429062613	0	0	0	0	0	0	0	0	0	0	0	33.69558	35.46077	1	4.752027	22.2406
575						2	C	785069	784698							YBR292C	YBR292C||ebi.ac.uk:Database:sgd;A_06_P1546||www.chem.agilent.com:Database:agp		A_06_P1546	1081781	OLIGO	8.255000013	.94074074	40	6	1	575			893	134	1	.1381874752	1	1	0	0	0	0	0	0	0	0	0	126.4448	230.9803	1	6.92421	22.37931
576					RPL42B	8	C	382753	381992	protein biosynthesis	structural constituent of ribosome					YHR141C	YHR141C||ebi.ac.uk:Database:sgd;A_06_P3718||www.chem.agilent.com:Database:agp		A_06_P3718	1080839	OLIGO	8.46666668	.94074074	41	6	1	576			914	133	1	.04919994157	1	1	0	0	0	0	0	0	0	0	1	49552.96	53606.59	1	663.4018	22.49811
577						12	C	704962	704495	biological process unknown	molecular function unknown					YLR281C	YLR281C||ebi.ac.uk:Database:sgd;A_06_P5096||www.chem.agilent.com:Database:agp		A_06_P5096	1084587	OLIGO	8.678333347	.94074074	42	6	1	577			935	134	1	.1557399425	1	1	0	0	0	0	0	0	0	0	0	103.5871	213.0283	1	5.276421	22.64074
578					STF2	7	C	508368	508114	ATP synthesis coupled proton transport*	molecular function unknown					YGR008C	YGR008C||ebi.ac.uk:Database:sgd;A_06_P3228||www.chem.agilent.com:Database:agp		A_06_P3228	1082502	OLIGO	8.890000014	.94074074	43	6	1	578			956	133	1	.05073729521	1	1	0	0	0	0	0	0	0	0	0	2052.578	2678.09	1	36.15795	22.29348
579					GDS1	15	W	1005133	1006701	aerobic respiration	molecular function unknown					YOR355W	YOR355W||ebi.ac.uk:Database:sgd;A_06_P6719||www.chem.agilent.com:Database:agp		A_06_P6719	1080726	OLIGO	9.101666681	.94074074	44	6	1	579			978	135	1	.04993971034	1	1	0	0	0	0	0	0	0	0	1	2614.036	2463.907	1	38.39018	22.60223
580					IPL1	16	C	157592	156489	chromosome segregation*	protein kinase activity					YPL209C	YPL209C||ebi.ac.uk:Database:sgd;A_06_P6969||www.chem.agilent.com:Database:agp		A_06_P6969	1086882	OLIGO	9.313333348	.94074074	45	6	1	580			999	134	1	.1268968794	1	1	0	0	0	0	0	0	0	0	1	214.2246	167.3717	1	8.631441	22.28358
581					UFD4	11	C	425518	421067	protein monoubiquitination*	ubiquitin-protein ligase activity					YKL010C	YKL010C||ebi.ac.uk:Database:sgd;A_06_P4417||www.chem.agilent.com:Database:agp		A_06_P4417	1081321	OLIGO	9.525000015	.94074074	46	6	1	581			1020	134	1	.04985570657	1	1	0	0	0	0	0	0	0	0	1	2602.82	2727.067	1	38.51006	22.50554
582					MDM32	15	W	606514	608475	mitochondrion organization and biogenesis*	molecular function unknown					YOR147W	YOR147W||ebi.ac.uk:Database:sgd;A_06_P6509||www.chem.agilent.com:Database:agp		A_06_P6509	1086211	OLIGO	9.736666682	.94074074	47	6	1	582			1041	133	1	.05676676963	1	1	0	0	0	0	0	0	0	0	1	737.3463	840.9643	1	14.94403	22.09665
583					HHT1	2	W	256329	256739	chromatin assembly or disassembly	DNA binding					YBR010W	YBR010W||ebi.ac.uk:Database:sgd;A_06_P1257||www.chem.agilent.com:Database:agp		A_06_P1257	1084122	OLIGO	9.948333349	.94074074	48	6	1	583			1063	134	1	.0510553055	1	1	0	0	0	0	0	0	0	0	1	28672.18	18541.6	1	313.6815	22.25641
584					PSE1	13	C	892220	888951	mRNA-nucleus export	protein carrier activity					YMR308C	YMR308C||ebi.ac.uk:Database:sgd;A_06_P5751||www.chem.agilent.com:Database:agp		A_06_P5751	1083275	OLIGO	10.160000016	.94074074	49	6	1	584			1084	133	1	.0498076642	1	1	0	0	0	0	0	0	0	0	1	2764.891	2694.734	1	41.33659	21.77567
585					RPS18B	13	C	223828	222987	protein biosynthesis	structural constituent of ribosome					YML026C	YML026C||ebi.ac.uk:Database:sgd;A_06_P5316||www.chem.agilent.com:Database:agp		A_06_P5316	1084595	OLIGO	10.371666683	.94074074	50	6	1	585			1105	134	1	.04918706054	1	1	0	0	0	0	0	0	0	0	1	10039.82	9900.427	1	154.3768	22.1413
586						4	W	135897	137540	biological process unknown	molecular function unknown					YDL180W	YDL180W||ebi.ac.uk:Database:sgd;A_06_P1914||www.chem.agilent.com:Database:agp		A_06_P1914	1086702	OLIGO	10.58333335	.94074074	51	6	1	586			1126	134	1	.05209202951	1	1	0	0	0	0	0	0	0	0	1	1237.504	1377.831	1	17.78161	22.20741
587																	EQC||AgilentControlDB;(+)eQC-39||AgilentControlDB		(+)EQC-39	1081607	CONTROL	10.795000017	.94074074	52	6	1	587			1147	133	1	.76895029	1	1	0	0	0	0	0	0	0	0	0	28.78635	28.97051	1	5.757785	22.38521
588						3	C	139046	138399							YCR013C	YCR013C||ebi.ac.uk:Database:sgd;A_06_P1634||www.chem.agilent.com:Database:agp		A_06_P1634	1083382	OLIGO	11.006666684	.94074074	53	6	1	588			1168	133	1	.05649915935	1	1	0	0	0	0	0	0	0	0	0	808.8401	1501.138	1	16.04476	22.38403
589					SIL1	15	C	267529	266264	SRP-dependent cotranslational protein-membrane targeting, translocation	molecular function unknown					YOL031C	YOL031C||ebi.ac.uk:Database:sgd;A_06_P6222||www.chem.agilent.com:Database:agp		A_06_P6222	1084055	OLIGO	11.218333351	.94074074	54	6	1	589			1190	134	1	.06016739423	1	1	0	0	0	0	0	0	0	0	0	747.196	574.8989	1	17.8007	22.22305
590					BNI1	14	C	135382	129521	actin filament organization*	cytoskeletal regulatory protein binding					YNL271C	YNL271C||ebi.ac.uk:Database:sgd;A_06_P6043||www.chem.agilent.com:Database:agp		A_06_P6043	1085318	OLIGO	11.430000018	.94074074	55	6	1	590			1211	133	1	.05048727543	1	1	0	0	0	0	0	0	0	0	1	2064.016	1883.055	1	31.01848	22.42748
591					YUR1	10	C	152917	151631	protein amino acid N-linked glycosylation*	mannosyltransferase activity					YJL139C	YJL139C||ebi.ac.uk:Database:sgd;A_06_P4160||www.chem.agilent.com:Database:agp		A_06_P4160	1082611	OLIGO	11.641666685	.94074074	56	6	1	591			1232	134	1	.06264321128	1	1	0	0	0	0	0	0	0	0	0	511.9229	660.4911	1	14.12241	22.14652
592					KES1	16	C	279698	278394	vesicle-mediated transport*	oxysterol binding					YPL145C	YPL145C||ebi.ac.uk:Database:sgd;A_06_P6904||www.chem.agilent.com:Database:agp		A_06_P6904	1085343	OLIGO	11.853333352	.94074074	57	6	1	592			1253	133	1	.04958827446	1	1	0	0	0	0	0	0	0	0	1	5246.164	4495.597	1	79.16245	22.04059
593						16	C	825672	825343							YPR146C	YPR146C||ebi.ac.uk:Database:sgd;A_06_P7194||www.chem.agilent.com:Database:agp		A_06_P7194	1082709	OLIGO	12.065000019	.94074074	58	6	1	593			1275	134	1	.05024875931	1	1	0	0	0	0	0	0	0	0	1	2181.423	2527.275	1	31.1618	22.37313
594					ATP5	4	C	1058808	1058170	ATP synthesis coupled proton transport	structural molecule activity*					YDR298C	YDR298C||ebi.ac.uk:Database:sgd;A_06_P2287||www.chem.agilent.com:Database:agp		A_06_P2287	1085077	OLIGO	12.276666686	.94074074	59	6	1	594			1296	133	1	.04919395434	1	1	0	0	0	0	0	0	0	0	1	12190.51	12835.97	1	140.483	22.44944
595					EHT1	2	C	586157	584802	lipid metabolism	serine hydrolase activity					YBR177C	YBR177C||ebi.ac.uk:Database:sgd;A_06_P1430||www.chem.agilent.com:Database:agp		A_06_P1430	1084167	OLIGO	12.488333353	.94074074	60	6	1	595			1317	135	1	.04991992355	1	1	0	0	0	0	0	0	0	0	1	5469.613	4310.916	1	48.53753	22.56631
596					INP1	13	C	671324	670062	peroxisome inheritance	molecular function unknown					YMR204C	YMR204C||ebi.ac.uk:Database:sgd;A_06_P5643||www.chem.agilent.com:Database:agp		A_06_P5643	1083576	OLIGO	12.70000002	.94074074	61	6	1	596			1337	133	1	.1328577308	1	1	0	0	0	0	0	0	0	0	1	203.1117	158.5166	1	9.078696	22.2482
597					CDC6	10	W	69337	70878	pre-replicative complex formation and maintenance	protein binding*					YJL194W	YJL194W||ebi.ac.uk:Database:sgd;A_06_P4216||www.chem.agilent.com:Database:agp		A_06_P4216	1086891	OLIGO	12.911666687	.94074074	62	6	1	597			1359	134	1	.07679443038	1	1	0	0	0	0	0	0	0	0	1	379.1316	371.9068	1	9.235575	22.11152
598						2	W	270247	270633	response to dessication	molecular function unknown					YBR016W	YBR016W||ebi.ac.uk:Database:sgd;A_06_P1263||www.chem.agilent.com:Database:agp		A_06_P1263	1083088	OLIGO	13.123333354	.94074074	63	6	1	598			1380	134	1	.04981287158	1	1	0	0	0	0	0	0	0	0	1	2809.83	2686.165	1	56.4847	22.05839
599					PHO8	4	C	1420240	1418540	protein amino acid dephosphorylation*	alkaline phosphatase activity					YDR481C	YDR481C||ebi.ac.uk:Database:sgd;A_06_P2474||www.chem.agilent.com:Database:agp		A_06_P2474	1086738	OLIGO	13.335000021	.94074074	64	6	1	599			1401	134	1	.04938760379	1	1	0	0	0	0	0	0	0	0	1	5724.917	5222.387	1	77.54647	22.04762
600																	EQC||AgilentControlDB;(+)eQC-39||AgilentControlDB		(+)EQC-39	1081607	CONTROL	13.546666688	.94074074	65	6	1	600			1423	133	1	.6980894419	1	1	0	0	0	0	0	0	0	0	0	27.2764	36.85669	1	4.514215	22.28309
601						11	W	656474	657394	transport	ATPase activity, coupled to transmembrane movement of substances					YKR104W	YKR104W||ebi.ac.uk:Database:sgd;A_06_P4742||www.chem.agilent.com:Database:agp		A_06_P4742	1081776	OLIGO	13.758333355	.94074074	66	6	1	601			1443	134	1	.07948322024	1	1	0	0	0	0	0	0	0	0	0	406.1961	313.4382	1	9.909633	22.34351
602					CAT8	13	C	831328	827027	positive regulation of transcription from RNA polymerase II promoter*	specific RNA polymerase II transcription factor activity					YMR280C	YMR280C||ebi.ac.uk:Database:sgd;A_06_P5719||www.chem.agilent.com:Database:agp		A_06_P5719	1080682	OLIGO	13.970000022	.94074074	67	6	1	602			1465	133	1	.05630382733	1	1	0	0	0	0	0	0	0	0	0	1119.437	740.6429	1	20.5494	22.49818
603					ZRG17	14	C	699431	697614	zinc ion transport	molecular function unknown					YNR039C	YNR039C||ebi.ac.uk:Database:sgd;A_06_P6152||www.chem.agilent.com:Database:agp		A_06_P6152	1083115	OLIGO	14.181666689	.94074074	68	6	1	603			1486	134	1	.06132295366	1	1	0	0	0	0	0	0	0	0	1	567.2652	651.3197	1	10.9373	21.98535
604					GAL11	15	W	234938	238183	transcription from RNA polymerase II promoter	RNA polymerase II transcription mediator activity					YOL051W	YOL051W||ebi.ac.uk:Database:sgd;A_06_P6242||www.chem.agilent.com:Database:agp		A_06_P6242	1081953	OLIGO	14.393333356	.94074074	69	6	1	604			1507	134	1	.05248158782	1	1	0	0	0	0	0	0	0	0	0	1374.581	1153.118	1	25.81516	22.49084
605					YPS3	12	C	390271	388745	protein metabolism	aspartic-type endopeptidase activity					YLR121C	YLR121C||ebi.ac.uk:Database:sgd;A_06_P4934||www.chem.agilent.com:Database:agp		A_06_P4934	1084700	OLIGO	14.605000023	.94074074	70	6	1	605			1528	134	1	.05762848787	1	1	0	0	0	0	0	0	0	0	0	1029.056	2388.952	1	17.30974	22.39483
606						11	C	222931	222539							YKL115C	YKL115C||ebi.ac.uk:Database:sgd;A_06_P4527||www.chem.agilent.com:Database:agp		A_06_P4527	1086761	OLIGO	14.81666669	.94074074	71	6	1	606			1550	133	1	.1402926059	1	1	0	0	0	0	0	0	0	0	0	120.1024	234.2998	1	7.506857	21.93407
607					VPS35	10	C	133853	131019	protein retention in Golgi*	molecular function unknown					YJL154C	YJL154C||ebi.ac.uk:Database:sgd;A_06_P4175||www.chem.agilent.com:Database:agp		A_06_P4175	1085898	OLIGO	15.028333357	.94074074	72	6	1	607			1571	134	1	.05048431063	1	1	0	0	0	0	0	0	0	0	1	1899.043	1926.541	1	24.37893	21.88235
608						12	C	722032	721703							YLR294C	YLR294C||ebi.ac.uk:Database:sgd;A_06_P5110||www.chem.agilent.com:Database:agp		A_06_P5110	1083804	OLIGO	15.240000024	.94074074	73	6	1	608			1592	133	1	.04938233946	1	1	0	0	0	0	0	0	0	0	1	4565.071	4762.325	1	78.83322	21.9283
609					CPD1	7	W	984971	985690	meiosis*	2',3'-cyclic-nucleotide 3'-phosphodiesterase activity					YGR247W	YGR247W||ebi.ac.uk:Database:sgd;A_06_P3468||www.chem.agilent.com:Database:agp		A_06_P3468	1083486	OLIGO	15.451666691	.94074074	74	6	1	609			1613	135	1	.07729456463	1	1	0	0	0	0	0	0	0	0	1	368.9282	373.9045	1	10.79376	22.02518
610					MAS1	12	C	493256	491868	mitochondrial protein processing	mitochondrial processing peptidase activity					YLR163C	YLR163C||ebi.ac.uk:Database:sgd;A_06_P4977||www.chem.agilent.com:Database:agp		A_06_P4977	1085883	OLIGO	15.663333358	.94074074	75	6	1	610			1634	134	1	.05125868077	1	1	0	0	0	0	0	0	0	0	1	1568.441	1487.716	1	22.81299	22.37011
611						9	C	421787	421023	biological process unknown	molecular function unknown					YIR035C	YIR035C||ebi.ac.uk:Database:sgd;A_06_P4012||www.chem.agilent.com:Database:agp		A_06_P4012	1086706	OLIGO	15.875000025	.94074074	76	6	1	611			1655	134	1	.05415972605	1	1	0	0	0	0	0	0	0	0	0	3335.977	6730.951	1	47.13914	22.38182
612						11	W	304759	305529	biological process unknown	molecular function unknown					YKL071W	YKL071W||ebi.ac.uk:Database:sgd;A_06_P4481||www.chem.agilent.com:Database:agp		A_06_P4481	1080860	OLIGO	16.086666692	.94074074	77	6	1	612			1676	133	1	.5037987325	1	1	0	0	0	0	0	0	0	0	1	37.48041	51.69374	1	6.364977	22.46909
613																	EQC||AgilentControlDB;(+)eQC-39||AgilentControlDB		(+)EQC-39	1081607	CONTROL	16.298333359	.94074074	78	6	1	613			1698	134	1	.652336771	0	0	0	0	0	0	0	0	0	0	0	33.03721	35.12014	1	4.44267	22.09818
614					PCL8	16	W	136749	138227	regulation of glycogen biosynthesis*	cyclin-dependent protein kinase regulator activity					YPL219W	YPL219W||ebi.ac.uk:Database:sgd;A_06_P6979||www.chem.agilent.com:Database:agp		A_06_P6979	1083849	OLIGO	16.510000026	.94074074	79	6	1	614			1719	133	1	.0611492871	1	1	0	0	0	0	0	0	0	0	1	625.0984	593.9699	1	12.56537	22.66078
615					GRH1	4	W	1477229	1478347	mitotic spindle checkpoint	molecular function unknown					YDR517W	YDR517W||ebi.ac.uk:Database:sgd;A_06_P2510||www.chem.agilent.com:Database:agp		A_06_P2510	1083313	OLIGO	16.721666693	.94074074	80	6	1	615			1740	134	1	.05169670101	1	1	0	0	0	0	0	0	0	0	0	1405.791	1821.772	1	22.71371	22.0814
616					CTR3	12	W	947250	947975	copper ion import	copper uptake transporter activity					YLR411W	YLR411W||ebi.ac.uk:Database:sgd;A_06_P5229||www.chem.agilent.com:Database:agp		A_06_P5229	1082627	OLIGO	16.93333336	.94074074	81	6	1	616			1761	134	1	.1642582891	1	1	0	0	0	0	0	0	0	0	1	123.465	161.42	1	7.300921	22.28788
617						11	C	30688	26828	biological process unknown	molecular function unknown					YKL215C	YKL215C||ebi.ac.uk:Database:sgd;A_06_P4627||www.chem.agilent.com:Database:agp		A_06_P4627	1086469	OLIGO	17.145000027	.94074074	82	6	1	617			1782	134	1	.05206163592	1	1	0	0	0	0	0	0	0	0	1	1297.005	1279.192	1	24.62986	21.89259
618					SFB3	8	C	301936	299147	ER to Golgi transport	molecular function unknown					YHR098C	YHR098C||ebi.ac.uk:Database:sgd;A_06_P3673||www.chem.agilent.com:Database:agp		A_06_P3673	1080630	OLIGO	17.356666694	.94074074	83	6	1	618			1804	134	1	.0503602352	1	1	0	0	0	0	0	0	0	0	1	2003.56	2010.559	1	29.52689	22.16254
619						3	C	160368	158533	biological process unknown	molecular function unknown					YCR023C	YCR023C||ebi.ac.uk:Database:sgd;A_06_P1647||www.chem.agilent.com:Database:agp		A_06_P1647	1085267	OLIGO	17.568333361	.94074074	84	6	1	619			1824	134	1	.061014295	1	1	0	0	0	0	0	0	0	0	1	584.0372	647.3044	1	12.91449	21.98921
620						13	C	784280	782619	biological process unknown	molecular function unknown					YMR258C	YMR258C||ebi.ac.uk:Database:sgd;A_06_P5697||www.chem.agilent.com:Database:agp		A_06_P5697	1083698	OLIGO	17.780000028	.94074074	85	6	1	620			1846	134	1	.05068483118	1	1	0	0	0	0	0	0	0	0	1	2012.504	1767.938	1	41.8375	22.42857
621						11	C	369563	369171							YKL036C	YKL036C||ebi.ac.uk:Database:sgd;A_06_P4445||www.chem.agilent.com:Database:agp		A_06_P4445	1085012	OLIGO	17.991666695	.94074074	86	6	1	621			1867	135	1	.4798887801	1	1	0	0	0	0	0	0	0	0	1	44.20762	48.71242	1	6.363906	22.29455
622					SWF1	4	W	703229	704239	spore wall assembly (sensu Fungi)	molecular function unknown					YDR126W	YDR126W||ebi.ac.uk:Database:sgd;A_06_P2114||www.chem.agilent.com:Database:agp		A_06_P2114	1082753	OLIGO	18.203333362	.94074074	87	6	1	622			1888	133	1	.2624040607	1	1	0	0	0	0	0	0	0	0	1	95.68401	76.99935	1	7.408864	22.42292
623						15	C	70544	70155							YOL134C	YOL134C||ebi.ac.uk:Database:sgd;A_06_P6327||www.chem.agilent.com:Database:agp		A_06_P6327	1086250	OLIGO	18.415000029	.94074074	88	6	1	623			1910	135	1	.6781530826	1	1	0	0	0	0	0	0	0	0	1	37.0586	28.81895	1	5.82406	22.64748
624					HOS3	16	W	329605	331698	histone deacetylation	histone deacetylase activity					YPL116W	YPL116W||ebi.ac.uk:Database:sgd;A_06_P6875||www.chem.agilent.com:Database:agp		A_06_P6875	1085526	OLIGO	18.626666696	.94074074	89	6	1	624			1930	133	1	.05635862606	1	1	0	0	0	0	0	0	0	0	0	1115.157	736.9143	1	21.14805	22.48754
625						15	C	751895	751476							YOR218C	YOR218C||ebi.ac.uk:Database:sgd;A_06_P6580||www.chem.agilent.com:Database:agp		A_06_P6580	1085986	OLIGO	18.838333363	.94074074	90	6	1	625			1951	134	1	.6365310261	1	1	0	0	0	0	0	0	0	0	1	39.59421	30.63217	1	6.152891	22.62271
626																	EQC||AgilentControlDB;(+)eQC-39||AgilentControlDB		(+)EQC-39	1081607	CONTROL	19.05000003	.94074074	91	6	1	626			1974	132	1	.6236029112	1	1	0	0	0	0	0	0	0	0	0	38.60001	32.85135	1	6.046895	22.68561
627					SLC1	4	C	363583	362672	sphingolipid biosynthesis	1-acylglycerol-3-phosphate O-acyltransferase activity					YDL052C	YDL052C||ebi.ac.uk:Database:sgd;A_06_P1781||www.chem.agilent.com:Database:agp		A_06_P1781	1081872	OLIGO	19.261666697	.94074074	92	6	1	627			1994	134	1	.05036368785	1	1	0	0	0	0	0	0	0	0	1	3039.357	4047.599	1	51.75811	22.69549
628					ERG6	13	C	252990	251839	ergosterol biosynthesis	sterol 24-C-methyltransferase activity					YML008C	YML008C||ebi.ac.uk:Database:sgd;A_06_P5295||www.chem.agilent.com:Database:agp		A_06_P5295	1083805	OLIGO	19.473333364	.94074074	93	6	1	628			2015	133	1	.05079726216	1	1	0	0	0	0	0	0	0	0	0	2672.17	2029.628	1	51.84241	22.5146
629					PMT6	7	W	897507	899786	protein amino acid O-linked glycosylation	dolichyl-phosphate-mannose-protein mannosyltransferase activity					YGR199W	YGR199W||ebi.ac.uk:Database:sgd;A_06_P3420||www.chem.agilent.com:Database:agp		A_06_P3420	1084986	OLIGO	19.685000031	.94074074	94	6	1	629			2036	135	1	.0500686503	1	1	0	0	0	0	0	0	0	0	1	2606.544	3118.774	1	40.78998	22.39695
630						1	W	228835	229308	biological process unknown	molecular function unknown					YAR075W	YAR075W||ebi.ac.uk:Database:sgd;A_06_P1129||www.chem.agilent.com:Database:agp		A_06_P1129	1081996	OLIGO	19.896666698	.94074074	95	6	1	630			2057	133	1	.054279484	1	1	0	0	0	0	0	0	0	0	0	2085.61	1170.825	1	28.45789	22.20939
631						10	W	137041	137343							YJL150W	YJL150W||ebi.ac.uk:Database:sgd;A_06_P4171||www.chem.agilent.com:Database:agp		A_06_P4171	1083940	OLIGO	20.108333365	.94074074	96	6	1	631			2079	134	1	.6606026543	1	1	0	0	0	0	0	0	0	0	1	36.90134	30.57789	1	6.412953	22.11594
632					ALG6	15	W	329417	331051	protein amino acid glycosylation*	transferase activity, transferring hexosyl groups					YOR002W	YOR002W||ebi.ac.uk:Database:sgd;A_06_P6362||www.chem.agilent.com:Database:agp		A_06_P6362	1081916	OLIGO	20.320000032	.94074074	97	6	1	632			2100	133	1	.05020176187	1	1	0	0	0	0	0	0	0	0	1	2242.312	2124.568	1	34.65349	22.51373
633					TIF1	11	W	554629	555816	translational initiation	translation initiation factor activity					YKR059W	YKR059W||ebi.ac.uk:Database:sgd;A_06_P4697||www.chem.agilent.com:Database:agp		A_06_P4697	1081296	OLIGO	20.531666699	.94074074	98	6	1	633			2121	134	1	.04913587059	1	1	0	0	0	0	0	0	0	0	1	68756.78	68731.33	1	939.4267	22.47059
634					SOD1	10	C	622927	622463	zinc ion homeostasis*	copper, zinc superoxide dismutase activity					YJR104C	YJR104C||ebi.ac.uk:Database:sgd;A_06_P4347||www.chem.agilent.com:Database:agp		A_06_P4347	1081476	OLIGO	20.743333366	.94074074	99	6	1	634			2143	133	1	.04915346176	1	1	0	0	0	0	0	0	0	0	1	47308.5	49247.02	1	453.5533	22.72598
635					ECM22	12	C	602465	600021	sterol biosynthesis	RNA polymerase II transcription factor activity					YLR228C	YLR228C||ebi.ac.uk:Database:sgd;A_06_P5042||www.chem.agilent.com:Database:agp		A_06_P5042	1083470	OLIGO	20.955000033	.94074074	100	6	1	635			2164	134	1	.05739843337	1	1	0	0	0	0	0	0	0	0	0	769.0406	1531.384	1	15.81943	22.8513
636					RFC4	15	C	142554	141583	mismatch repair*	DNA clamp loader activity*					YOL094C	YOL094C||ebi.ac.uk:Database:sgd;A_06_P6287||www.chem.agilent.com:Database:agp		A_06_P6287	1082328	OLIGO	21.1666667	.94074074	101	6	1	636			2184	134	1	.07103683207	1	1	0	0	0	0	0	0	0	0	1	413.2999	452.5681	1	11.93756	22.45926
637					YPR1	4	W	1213894	1214832	arabinose catabolism*	oxidoreductase activity*					YDR368W	YDR368W||ebi.ac.uk:Database:sgd;A_06_P2360||www.chem.agilent.com:Database:agp		A_06_P2360	1084918	OLIGO	21.378333367	.94074074	102	6	1	637			2205	134	1	.04927619681	1	1	0	0	0	0	0	0	0	0	1	6200.287	6456.38	1	90.51716	22.65217
638						2	W	642578	642895							YBR209W	YBR209W||ebi.ac.uk:Database:sgd;A_06_P1462||www.chem.agilent.com:Database:agp		A_06_P1462	1085423	OLIGO	21.590000034	.94074074	103	6	1	638			2227	134	1	.6834796643	0	0	0	0	0	0	0	0	0	0	0	33.32626	31.70212	1	5.378204	22.93431
639																	EQC||AgilentControlDB;(+)eQC-39||AgilentControlDB		(+)EQC-39	1081607	CONTROL	21.801666701	.94074074	104	6	1	639			2248	134	1	.7244310991	1	1	0	0	0	0	0	0	0	0	0	34.68097	26.96777	1	4.948106	22.75281
640					CDC45	12	C	345942	343990	DNA replication initiation*	DNA binding					YLR103C	YLR103C||ebi.ac.uk:Database:sgd;A_06_P4916||www.chem.agilent.com:Database:agp		A_06_P4916	1081825	OLIGO	22.013333368	.94074074	105	6	1	640			2269	134	1	.0598909596	1	1	0	0	0	0	0	0	0	0	0	750.3555	586.0051	1	17.8418	22.43846
641					GZF3	10	C	211494	209839	negative regulation of transcription from RNA polymerase II promoter*	transcription factor activity*					YJL110C	YJL110C||ebi.ac.uk:Database:sgd;A_06_P4132||www.chem.agilent.com:Database:agp		A_06_P4132	1081038	OLIGO	22.225000035	.94074074	106	6	1	641			2290	135	1	.07548483681	1	1	0	0	0	0	0	0	0	0	0	504.0397	312.9782	1	13.82895	22.2342
642					HCM1	3	W	229305	230999	transcription initiation from RNA polymerase II promoter*	specific RNA polymerase II transcription factor activity					YCR065W	YCR065W||ebi.ac.uk:Database:sgd;A_06_P1687||www.chem.agilent.com:Database:agp		A_06_P1687	1086922	OLIGO	22.436666702	.94074074	107	6	1	642			2311	134	1	.05132619879	1	1	0	0	0	0	0	0	0	0	1	1454.403	1593.218	1	25.96166	21.68441
643					FAB1	6	W	184490	191326	response to stress*	1-phosphatidylinositol-3-phosphate 5-kinase activity					YFR019W	YFR019W||ebi.ac.uk:Database:sgd;A_06_P2914||www.chem.agilent.com:Database:agp		A_06_P2914	1081534	OLIGO	0	1.128888888	1	7	1	643			67	152	1	.06838410794	1	1	0	0	0	0	0	0	0	0	1	493.8467	441.5899	1	14.16877	21.46377
644					GAL7	2	C	275527	274427	galactose metabolism	UTP-hexose-1-phosphate uridylyltransferase activity					YBR018C	YBR018C||ebi.ac.uk:Database:sgd;A_06_P1265||www.chem.agilent.com:Database:agp		A_06_P1265	1086683	OLIGO	.211666667	1.128888888	2	7	1	644			88	153	1	.4714037922	1	1	0	0	0	0	0	0	0	0	1	49.75863	44.8628	1	6.941256	22.02222
645					INP54	15	C	205884	204730	exocytosis*	inositol-polyphosphate 5-phosphatase activity					YOL065C	YOL065C||ebi.ac.uk:Database:sgd;A_06_P6257||www.chem.agilent.com:Database:agp		A_06_P6257	1085071	OLIGO	.423333334	1.128888888	3	7	1	645			110	152	1	.05196960544	1	1	0	0	0	0	0	0	0	0	1	1423.01	1264.564	1	23.37882	22.17424
646						15	C	727234	725564	biological process unknown	molecular function unknown					YOR205C	YOR205C||ebi.ac.uk:Database:sgd;A_06_P6567||www.chem.agilent.com:Database:agp		A_06_P6567	1081520	OLIGO	.635000001	1.128888888	4	7	1	646			131	153	1	.06842942436	1	1	0	0	0	0	0	0	0	0	1	435.7269	500.314	1	12.13416	21.84074
647						7	C	173085	171421	biological process unknown	molecular function unknown					YGL176C	YGL176C||ebi.ac.uk:Database:sgd;A_06_P3131||www.chem.agilent.com:Database:agp		A_06_P3131	1082694	OLIGO	.846666668	1.128888888	5	7	1	647			152	153	1	.08188330113	1	1	0	0	0	0	0	0	0	0	1	347.4523	329.5563	1	7.905529	22.00395
649					YPS6	9	C	432107	430494	biological process unknown	aspartic-type endopeptidase activity					YIR039C	YIR039C||ebi.ac.uk:Database:sgd;A_06_P4016||www.chem.agilent.com:Database:agp		A_06_P4016	1082762	OLIGO	1.270000002	1.128888888	7	7	1	649			195	152	1	.1203756326	1	1	0	0	0	0	0	0	0	0	0	119.4257	342.7259	1	6.876247	21.57934
650					ATG21	16	W	361869	363359	autophagy*	phosphoinositide binding					YPL100W	YPL100W||ebi.ac.uk:Database:sgd;A_06_P6859||www.chem.agilent.com:Database:agp		A_06_P6859	1082609	OLIGO	1.481666669	1.128888888	8	7	1	650			216	153	1	.0544528463	1	1	0	0	0	0	0	0	0	0	0	1095.867	884.5404	1	19.60251	22.15385
651					RNR3	9	C	240705	238096	DNA replication	ribonucleoside-diphosphate reductase activity					YIL066C	YIL066C||ebi.ac.uk:Database:sgd;A_06_P3866||www.chem.agilent.com:Database:agp		A_06_P3866	1084419	OLIGO	1.693333336	1.128888888	9	7	1	651			237	152	1	.09157592867	1	1	0	0	0	0	0	0	0	0	1	248.4396	333.4937	1	9.068345	22.28626
652						13	C	82620	82219							YML094C-A	YML094C-A||ebi.ac.uk:Database:sgd;A_06_P5386||www.chem.agilent.com:Database:agp		A_06_P5386	1080824	OLIGO	1.905000003	1.128888888	10	7	1	652			259	153	1	.6189633651	1	1	0	0	0	0	0	0	0	0	1	41.9434	30.50459	1	5.710695	22.35316
653					GID8	13	C	540055	538688	negative regulation of gluconeogenesis*	molecular function unknown					YMR135C	YMR135C||ebi.ac.uk:Database:sgd;A_06_P5566||www.chem.agilent.com:Database:agp		A_06_P5566	1082931	OLIGO	2.11666667	1.128888888	11	7	1	653			280	152	1	.05024000912	1	1	0	0	0	0	0	0	0	0	1	2295.843	2099.709	1	42.54424	21.98519
654					USE1	7	W	317345	318082	ER to Golgi transport*	SNAP receptor activity					YGL098W	YGL098W||ebi.ac.uk:Database:sgd;A_06_P3053||www.chem.agilent.com:Database:agp		A_06_P3053	1084061	OLIGO	2.328333337	1.128888888	12	7	1	654			301	153	1	.08616748757	1	1	0	0	0	0	0	0	0	0	1	280.851	351.043	1	10.40704	22.22593
655																	(+)E1A_r60_3||AgilentControlDB;E1A_r60_3||AgilentControlDB		(+)E1A_R60_3	1545261	CONTROL	2.540000004	1.128888888	13	7	1	655			322	151	1	.693188561	1	1	0	0	0	0	0	0	0	0	0	34.01369	30.16379	1	5.20369	22.24715
656						7	C	217374	216697							YGL152C	YGL152C||ebi.ac.uk:Database:sgd;A_06_P3107||www.chem.agilent.com:Database:agp		A_06_P3107	1082367	OLIGO	2.751666671	1.128888888	14	7	1	656			343	153	1	.2193801963	1	1	0	0	0	0	0	0	0	0	1	72.90764	143.313	1	8.008242	21.99638
657					CCW14	12	W	903724	904440	cell wall organization and biogenesis	structural constituent of cell wall					YLR390W-A	YLR390W-A||ebi.ac.uk:Database:sgd;A_06_P5209||www.chem.agilent.com:Database:agp		A_06_P5209	1084827	OLIGO	2.963333338	1.128888888	15	7	1	657			364	152	1	.05103085027	1	1	0	0	0	0	0	0	0	0	1	10051.83	15460.59	1	136.1606	22.40226
658					MMT1	13	W	616565	618097	iron ion homeostasis	molecular function unknown					YMR177W	YMR177W||ebi.ac.uk:Database:sgd;A_06_P5614||www.chem.agilent.com:Database:agp		A_06_P5614	1083771	OLIGO	3.175000005	1.128888888	16	7	1	658			385	152	1	.08069861205	1	1	0	0	0	0	0	0	0	0	1	341.9325	350.5023	1	10.39341	22.29927
659					SLX9	7	C	643784	643152	DNA metabolism	molecular function unknown					YGR081C	YGR081C||ebi.ac.uk:Database:sgd;A_06_P3301||www.chem.agilent.com:Database:agp		A_06_P3301	1085493	OLIGO	3.386666672	1.128888888	17	7	1	659			407	152	1	.07806500219	1	1	0	0	0	0	0	0	0	0	1	388.9955	344.056	1	11.09555	22.27969
660					VPS5	15	W	453769	455796	protein retention in Golgi*	protein transporter activity					YOR069W	YOR069W||ebi.ac.uk:Database:sgd;A_06_P6431||www.chem.agilent.com:Database:agp		A_06_P6431	1083389	OLIGO	3.598333339	1.128888888	18	7	1	660			428	153	1	.06912986753	1	1	0	0	0	0	0	0	0	0	0	526.5379	404.1632	1	16.32203	22.30566
661						4	C	582495	581905	biological process unknown	molecular function unknown					YDR066C	YDR066C||ebi.ac.uk:Database:sgd;A_06_P2053||www.chem.agilent.com:Database:agp		A_06_P2053	1083827	OLIGO	3.810000006	1.128888888	19	7	1	661			449	152	1	.08672513408	1	1	0	0	0	0	0	0	0	0	1	316.4407	303.9375	1	10.32999	22.44151
662																	(+)E1A_r60_a20||AgilentControlDB;E1A_r60_a20||AgilentControlDB		(+)E1A_R60_A20	1545259	CONTROL	4.021666673	1.128888888	20	7	1	662			469	152	1	.2486640464	1	1	0	0	0	0	0	0	0	0	0	121.6459	66.3098	1	5.654984	22.3694
663					KRE5	15	W	949768	953865	beta-1,6 glucan biosynthesis	UDP-glucose:glycoprotein glucosyltransferase activity					YOR336W	YOR336W||ebi.ac.uk:Database:sgd;A_06_P6700||www.chem.agilent.com:Database:agp		A_06_P6700	1083339	OLIGO	4.23333334	1.128888888	21	7	1	663			491	152	1	.05034879934	1	1	0	0	0	0	0	0	0	0	1	1986.679	2101.464	1	34.8782	22.29502
664					SUL2	12	W	323545	326226	sulfate transport	sulfate transporter activity					YLR092W	YLR092W||ebi.ac.uk:Database:sgd;A_06_P4904||www.chem.agilent.com:Database:agp		A_06_P4904	1081763	OLIGO	4.445000007	1.128888888	22	7	1	664			512	153	1	.05009780634	1	1	0	0	0	0	0	0	0	0	1	5408.149	7207.475	1	73.38319	22.21147
665					ATP17	4	W	1228601	1228906	ATP synthesis coupled proton transport	hydrogen-transporting ATP synthase activity, rotational mechanism					YDR377W	YDR377W||ebi.ac.uk:Database:sgd;A_06_P2369||www.chem.agilent.com:Database:agp		A_06_P2369	1086325	OLIGO	4.656666674	1.128888888	23	7	1	665			533	152	1	.05090048196	1	1	0	0	0	0	0	0	0	0	1	16991.39	25792.05	1	252.0119	21.88129
666					SAC6	4	C	715374	713335	endocytosis*	protein binding, bridging*					YDR129C	YDR129C||ebi.ac.uk:Database:sgd;A_06_P2117||www.chem.agilent.com:Database:agp		A_06_P2117	1082104	OLIGO	4.868333341	1.128888888	24	7	1	666			555	153	1	.04924856779	1	1	0	0	0	0	0	0	0	0	1	13983.75	12759.73	1	171.2433	22.01075
667					YBT1	12	C	46264	41279	bile acid transport	ATPase activity, coupled to transmembrane movement of substances*					YLL048C	YLL048C||ebi.ac.uk:Database:sgd;A_06_P4793||www.chem.agilent.com:Database:agp		A_06_P4793	1084036	OLIGO	5.080000008	1.128888888	25	7	1	667			576	153	1	.04969996267	1	1	0	0	0	0	0	0	0	0	1	2947.078	3000.977	1	37.26304	22.16906
668						9	W	9183	9500	biological process unknown	molecular function unknown					YIL175W	YIL175W||ebi.ac.uk:Database:sgd;A_06_P3974||www.chem.agilent.com:Database:agp		A_06_P3974	1086415	OLIGO	5.291666675	1.128888888	26	7	1	668			597	153	1	.5136831426	1	1	0	0	0	0	0	0	0	0	1	46.57281	40.26251	1	6.548947	21.99631
670					VPS4	16	C	887833	886520	protein retention in Golgi*	ATPase activity					YPR173C	YPR173C||ebi.ac.uk:Database:sgd;A_06_P7221||www.chem.agilent.com:Database:agp		A_06_P7221	1082710	OLIGO	5.715000009	1.128888888	28	7	1	670			640	153	1	.05059704515	1	1	0	0	0	0	0	0	0	0	1	6093.392	4271.165	1	80.14324	21.9304
671					RPS10A	15	W	867095	867849	protein biosynthesis	structural constituent of ribosome					YOR293W	YOR293W||ebi.ac.uk:Database:sgd;A_06_P6654||www.chem.agilent.com:Database:agp		A_06_P6654	1081651	OLIGO	5.926666676	1.128888888	29	7	1	671			661	152	1	.05080123303	1	1	0	0	0	0	0	0	0	0	1	6722.37	10005.26	1	85.67888	22.52256
672					CGR1	7	W	440068	440430	rRNA processing*	molecular function unknown					YGL029W	YGL029W||ebi.ac.uk:Database:sgd;A_06_P2984||www.chem.agilent.com:Database:agp		A_06_P2984	1081739	OLIGO	6.138333343	1.128888888	30	7	1	672			682	153	1	.05342494212	1	1	0	0	0	0	0	0	0	0	1	1068.801	1045.413	1	20.00761	22.21033
673					UTP10	10	C	217226	211917	processing of 20S pre-rRNA	snoRNA binding					YJL109C	YJL109C||ebi.ac.uk:Database:sgd;A_06_P4131||www.chem.agilent.com:Database:agp		A_06_P4131	1085220	OLIGO	6.35000001	1.128888888	31	7	1	673			703	152	1	.05027683531	1	1	0	0	0	0	0	0	0	0	1	2057.752	2232.732	1	33.55825	22.30534
674					ARC15	9	C	244459	243995	mitochondrion inheritance*	structural molecule activity*					YIL062C	YIL062C||ebi.ac.uk:Database:sgd;A_06_P3862||www.chem.agilent.com:Database:agp		A_06_P3862	1085545	OLIGO	6.561666677	1.128888888	32	7	1	674			724	153	1	.0493891571	1	1	0	0	0	0	0	0	0	0	1	4413.366	4461.424	1	64.16634	22.54902
675					ITR1	4	C	1445457	1443703	myo-inositol transport	myo-inositol transporter activity					YDR497C	YDR497C||ebi.ac.uk:Database:sgd;A_06_P2490||www.chem.agilent.com:Database:agp		A_06_P2490	1085488	OLIGO	6.773333344	1.128888888	33	7	1	675			745	152	1	.0510644571	1	1	0	0	0	0	0	0	0	0	1	35103.78	22668.94	1	329.9294	22.66418
676																	(+)E1A_r60_a104||AgilentControlDB;E1A_r60_a104||AgilentControlDB		(+)E1A_R60_A104	1545260	CONTROL	6.985000011	1.128888888	34	7	1	676			766	153	1	.6737177794	0	0	0	0	0	0	0	0	0	0	0	36.12142	30.03019	1	5.529197	22.20974
677					TIF5	16	W	648701	649918	regulation of translational initiation*	translation initiation factor activity*					YPR041W	YPR041W||ebi.ac.uk:Database:sgd;A_06_P7087||www.chem.agilent.com:Database:agp		A_06_P7087	1083177	OLIGO	7.196666678	1.128888888	35	7	1	677			787	152	1	.05423239088	1	1	0	0	0	0	0	0	0	0	0	909.323	1091.893	1	11.96088	22.35206
678					MDJ1	6	C	106230	104695	protein folding*	unfolded protein binding*					YFL016C	YFL016C||ebi.ac.uk:Database:sgd;A_06_P2841||www.chem.agilent.com:Database:agp		A_06_P2841	1086873	OLIGO	7.408333345	1.128888888	36	7	1	678			809	153	1	.05101077476	1	1	0	0	0	0	0	0	0	0	1	1610.772	1903.687	1	27.80413	22.10606
679					RNQ1	3	W	70150	71367	biological process unknown	molecular function unknown					YCL028W	YCL028W||ebi.ac.uk:Database:sgd;A_06_P1580||www.chem.agilent.com:Database:agp		A_06_P1580	1084877	OLIGO	7.620000012	1.128888888	37	7	1	679			830	152	1	.04936518809	1	1	0	0	0	0	0	0	0	0	1	4813.486	5061.509	1	54.89008	22.43284
680					HSV2	7	C	942218	940872	biological process unknown	phosphoinositide binding					YGR223C	YGR223C||ebi.ac.uk:Database:sgd;A_06_P3444||www.chem.agilent.com:Database:agp		A_06_P3444	1085783	OLIGO	7.831666679	1.128888888	38	7	1	680			851	153	1	.05436500868	1	1	0	0	0	0	0	0	0	0	1	991.9729	923.0485	1	21.8037	22.41818
681						7	C	1060046	1059021	biological process unknown	molecular function unknown					YGR283C	YGR283C||ebi.ac.uk:Database:sgd;A_06_P3505||www.chem.agilent.com:Database:agp		A_06_P3505	1082996	OLIGO	8.043333346	1.128888888	39	7	1	681			873	152	1	.07273187838	1	1	0	0	0	0	0	0	0	0	1	441.5873	388.4325	1	10.00046	22.384
682					CUP2	7	W	191135	191812	transcription initiation from RNA polymerase II promoter*	ligand-regulated transcription factor activity					YGL166W	YGL166W||ebi.ac.uk:Database:sgd;A_06_P3121||www.chem.agilent.com:Database:agp		A_06_P3121	1080688	OLIGO	8.255000013	1.128888888	40	7	1	682			894	153	1	.05379325954	1	1	0	0	0	0	0	0	0	0	0	1137.589	957.677	1	16.53848	22.23507
683																	E1A_r60_a107||AgilentControlDB;(+)E1A_r60_a107||AgilentControlDB		(+)E1A_R60_A107	1545262	CONTROL	8.46666668	1.128888888	41	7	1	683			914	153	1	.7253531769	1	1	0	0	0	0	0	0	0	0	0	30.66718	30.57652	1	4.74366	22.40909
684					DOT6	5	C	335184	333172	regulation of transcription from RNA polymerase II promoter*	molecular function unknown					YER088C	YER088C||ebi.ac.uk:Database:sgd;A_06_P2719||www.chem.agilent.com:Database:agp		A_06_P2719	1082893	OLIGO	8.678333347	1.128888888	42	7	1	684			935	153	1	.05250604191	1	1	0	0	0	0	0	0	0	0	0	1811.311	2991.661	1	28.03913	22.47059
685					INH1	4	W	135180	135437	ATP synthesis coupled proton transport	enzyme inhibitor activity					YDL181W	YDL181W||ebi.ac.uk:Database:sgd;A_06_P1915||www.chem.agilent.com:Database:agp		A_06_P1915	1085789	OLIGO	8.890000014	1.128888888	43	7	1	685			957	152	1	.04924234429	1	1	0	0	0	0	0	0	0	0	1	6805.382	6852.663	1	85.04869	22.62835
686					SIM1	9	W	128151	129578	microtubule cytoskeleton organization and biogenesis	molecular function unknown					YIL123W	YIL123W||ebi.ac.uk:Database:sgd;A_06_P3922||www.chem.agilent.com:Database:agp		A_06_P3922	1082585	OLIGO	9.101666681	1.128888888	44	7	1	686			978	153	1	.04929106382	1	1	0	0	0	0	0	0	0	0	1	10780.26	12001.55	1	125.6193	22.83146
687					NDE2	4	W	303211	304848	ethanol fermentation*	NADH dehydrogenase activity					YDL085W	YDL085W||ebi.ac.uk:Database:sgd;A_06_P1815||www.chem.agilent.com:Database:agp		A_06_P1815	1082045	OLIGO	9.313333348	1.128888888	45	7	1	687			999	152	1	.1316398914	1	1	0	0	0	0	0	0	0	0	1	184.2142	178.7377	1	7.552374	22.52157
688						15	C	461277	459481	transport	transporter activity					YOR071C	YOR071C||ebi.ac.uk:Database:sgd;A_06_P6433||www.chem.agilent.com:Database:agp		A_06_P6433	1085444	OLIGO	9.525000015	1.128888888	46	7	1	688			1020	153	1	.06634861492	1	1	0	0	0	0	0	0	0	0	0	405.557	700.2047	1	9.121323	22.63636
689					HAL5	10	C	109454	106887	cation homeostasis	protein kinase activity					YJL165C	YJL165C||ebi.ac.uk:Database:sgd;A_06_P4187||www.chem.agilent.com:Database:agp		A_06_P4187	1085019	OLIGO	9.736666682	1.128888888	47	7	1	689			1042	152	1	.05098337233	1	1	0	0	0	0	0	0	0	0	1	1609.248	1862.863	1	27.28082	22.68914
690																	E1A_r60_a22||AgilentControlDB;(+)E1A_r60_a22||AgilentControlDB		(+)E1A_R60_A22	1545265	CONTROL	9.948333349	1.128888888	48	7	1	690			1063	153	1	.3302580063	1	1	0	0	0	0	0	0	0	0	0	102.904	42.21759	1	6.426064	22.55596
691						12	W	951152	953179	biological process unknown	molecular function unknown					YLR413W	YLR413W||ebi.ac.uk:Database:sgd;A_06_P5231||www.chem.agilent.com:Database:agp		A_06_P5231	1081447	OLIGO	10.160000016	1.128888888	49	7	1	691			1084	152	1	.05080870017	1	1	0	0	0	0	0	0	0	0	0	2173.489	2935.257	1	32.93437	22.631
692						7	C	249536	248499	biological process unknown	molecular function unknown					YGL138C	YGL138C||ebi.ac.uk:Database:sgd;A_06_P3093||www.chem.agilent.com:Database:agp		A_06_P3093	1085118	OLIGO	10.371666683	1.128888888	50	7	1	692			1105	153	1	.7277362957	1	1	0	0	0	0	0	0	0	0	0	31.55007	29.51498	1	5.246604	22.65414
693					SLM1	9	C	169638	167578	actin cytoskeleton organization and biogenesis*	phosphoinositide binding					YIL105C	YIL105C||ebi.ac.uk:Database:sgd;A_06_P3904||www.chem.agilent.com:Database:agp		A_06_P3904	1084853	OLIGO	10.58333335	1.128888888	51	7	1	693			1126	152	1	.06673951947	1	1	0	0	0	0	0	0	0	0	0	548.3745	446.7332	1	11.32634	22.43223
694					SAT4	3	W	128467	130278	G1/S transition of mitotic cell cycle*	protein kinase activity					YCR008W	YCR008W||ebi.ac.uk:Database:sgd;A_06_P1629||www.chem.agilent.com:Database:agp		A_06_P1629	1081714	OLIGO	10.795000017	1.128888888	52	7	1	694			1147	153	1	.05057503578	1	1	0	0	0	0	0	0	0	0	1	2082.622	2626.804	1	24.6452	22.21583
695						8	W	456590	457951	biological process unknown	molecular function unknown					YHR177W	YHR177W||ebi.ac.uk:Database:sgd;A_06_P3755||www.chem.agilent.com:Database:agp		A_06_P3755	1084813	OLIGO	11.006666684	1.128888888	53	7	1	695			1168	152	1	.6855099014	1	1	0	0	0	0	0	0	0	0	0	35.71447	29.31953	1	5.897506	22.36131
696					RPS0B	12	W	242233	243350	protein biosynthesis*	structural constituent of ribosome					YLR048W	YLR048W||ebi.ac.uk:Database:sgd;A_06_P4860||www.chem.agilent.com:Database:agp		A_06_P4860	1085091	OLIGO	11.218333351	1.128888888	54	7	1	696			1190	153	1	.04925598677	1	1	0	0	0	0	0	0	0	0	1	91083.33	101534	1	863.1219	22.14126
697																	(+)E1A_r60_1||AgilentControlDB;E1A_r60_1||AgilentControlDB		(+)E1A_R60_1	1545263	CONTROL	11.430000018	1.128888888	55	7	1	697			1211	152	1	.2341067886	1	1	0	0	0	0	0	0	0	0	0	80.54073	115.4215	1	7.554456	22.75986
698					MTL1	7	W	529268	530923	cell wall organization and biogenesis	molecular function unknown					YGR023W	YGR023W||ebi.ac.uk:Database:sgd;A_06_P3243||www.chem.agilent.com:Database:agp		A_06_P3243	1080930	OLIGO	11.641666685	1.128888888	56	7	1	698			1232	153	1	.2378537966	1	1	0	0	0	0	0	0	0	0	1	86.07952	105.0672	1	6.268207	22.26545
699						12	W	1055067	1055681	biological process unknown	molecular function unknown					YLR456W	YLR456W||ebi.ac.uk:Database:sgd;A_06_P5275||www.chem.agilent.com:Database:agp		A_06_P5275	1086432	OLIGO	11.853333352	1.128888888	57	7	1	699			1253	152	1	.3110029365	1	1	0	0	0	0	0	0	0	0	1	90.49032	56.63683	1	6.498432	22.36
700					LYS14	4	C	512105	509733	lysine biosynthesis via aminoadipic acid	transcriptional activator activity					YDR034C	YDR034C||ebi.ac.uk:Database:sgd;A_06_P2019||www.chem.agilent.com:Database:agp		A_06_P2019	1084286	OLIGO	12.065000019	1.128888888	58	7	1	700			1274	153	1	.0523640259	1	1	0	0	0	0	0	0	0	0	0	1409.082	1177.256	1	22.42421	22.12727
701						8	W	558013	559923	biological process unknown	molecular function unknown					YHR218W	YHR218W||ebi.ac.uk:Database:sgd;A_06_P3797||www.chem.agilent.com:Database:agp		A_06_P3797	1085845	OLIGO	12.276666686	1.128888888	59	7	1	701			1296	152	1	.0539013116	1	1	0	0	0	0	0	0	0	0	0	1235.905	2153.856	1	18.60464	22.45627
702					EAF6	10	C	582169	581828	biological process unknown	molecular function unknown					YJR082C	YJR082C||ebi.ac.uk:Database:sgd;A_06_P4324||www.chem.agilent.com:Database:agp		A_06_P4324	1086778	OLIGO	12.488333353	1.128888888	60	7	1	702			1317	154	1	.05865217876	1	1	0	0	0	0	0	0	0	0	0	827.653	623.6003	1	14.68401	22.6391
703					SCP1	15	W	1026003	1026605	actin filament organization*	protein binding, bridging*					YOR367W	YOR367W||ebi.ac.uk:Database:sgd;A_06_P6731||www.chem.agilent.com:Database:agp		A_06_P6731	1085247	OLIGO	12.70000002	1.128888888	61	7	1	703			1337	152	1	.0530801606	1	1	0	0	0	0	0	0	0	0	1	1213.734	1054.012	1	16.91848	22.62637
704																	E1A_r60_n9||AgilentControlDB;(+)E1A_r60_n9||AgilentControlDB		(+)E1A_R60_N9	1545267	CONTROL	12.911666687	1.128888888	62	7	1	704			1358	153	1	.6779795922	1	1	0	0	0	0	0	0	0	0	0	37.29483	28.63592	1	5.755437	22.67159
705					GMH1	11	W	499924	500745	transport	molecular function unknown					YKR030W	YKR030W||ebi.ac.uk:Database:sgd;A_06_P4667||www.chem.agilent.com:Database:agp		A_06_P4667	1085762	OLIGO	13.123333354	1.128888888	63	7	1	705			1380	152	1	.05180889865	1	1	0	0	0	0	0	0	0	0	0	1395.589	1854.924	1	24.57338	22.67669
706						12	C	906305	904749	biological process unknown	molecular function unknown					YLR392C	YLR392C||ebi.ac.uk:Database:sgd;A_06_P5210||www.chem.agilent.com:Database:agp		A_06_P5210	1083225	OLIGO	13.335000021	1.128888888	64	7	1	706			1401	153	1	.08189859088	1	1	0	0	0	0	0	0	0	0	0	401.3047	289.7483	1	11.43286	22.10332
707					XDJ1	12	W	320702	322081	biological process unknown	chaperone regulator activity					YLR090W	YLR090W||ebi.ac.uk:Database:sgd;A_06_P4902||www.chem.agilent.com:Database:agp		A_06_P4902	1083067	OLIGO	13.546666688	1.128888888	65	7	1	707			1423	152	1	.05366821876	1	1	0	0	0	0	0	0	0	0	0	971.1419	1167.327	1	17.89981	22.18819
708						9	C	308573	308199							YIL025C	YIL025C||ebi.ac.uk:Database:sgd;A_06_P3825||www.chem.agilent.com:Database:agp		A_06_P3825	1086798	OLIGO	13.758333355	1.128888888	66	7	1	708			1444	152	1	.6509570996	1	1	0	0	0	0	0	0	0	0	0	37.14391	31.30583	1	5.877749	22.01107
709					AFG1	5	W	56571	58100	biological process unknown	ATPase activity					YEL052W	YEL052W||ebi.ac.uk:Database:sgd;A_06_P2593||www.chem.agilent.com:Database:agp		A_06_P2593	1084170	OLIGO	13.970000022	1.128888888	67	7	1	709			1465	152	1	.05044103552	1	1	0	0	0	0	0	0	0	0	1	2538.808	3317.962	1	41.21882	22.41434
710					SKN1	7	W	775198	777513	cell wall organization and biogenesis*	glucosidase activity					YGR143W	YGR143W||ebi.ac.uk:Database:sgd;A_06_P3364||www.chem.agilent.com:Database:agp		A_06_P3364	1086508	OLIGO	14.181666689	1.128888888	68	7	1	710			1486	153	1	.05157670549	1	1	0	0	0	0	0	0	0	0	0	1437.404	1838.88	1	23.33424	22.1306
711																	E1A_r60_a135||AgilentControlDB;(+)E1A_r60_a135||AgilentControlDB		(+)E1A_R60_A135	1545258	CONTROL	14.393333356	1.128888888	69	7	1	711			1507	153	1	.6347114729	1	1	0	0	0	0	0	0	0	0	0	37.81256	32.36964	1	4.839608	22.39785
712					INM1	8	C	198277	197390	inositol phosphate dephosphorylation	inositol-1(or 4)-monophosphatase activity					YHR046C	YHR046C||ebi.ac.uk:Database:sgd;A_06_P3618||www.chem.agilent.com:Database:agp		A_06_P3618	1084736	OLIGO	14.605000023	1.128888888	70	7	1	712			1529	153	1	.05106727816	1	1	0	0	0	0	0	0	0	0	1	1560.876	1652.049	1	27.74745	22.42164
713					BNI4	14	W	211921	214599	chitin biosynthesis*	protein binding					YNL233W	YNL233W||ebi.ac.uk:Database:sgd;A_06_P6005||www.chem.agilent.com:Database:agp		A_06_P6005	1084388	OLIGO	14.81666669	1.128888888	71	7	1	713			1549	152	1	.05632361029	1	1	0	0	0	0	0	0	0	0	1	773.7614	845.4383	1	18.83588	22.23592
714					PAU4	12	W	1062916	1063278	biological process unknown	molecular function unknown					YLR461W	YLR461W||ebi.ac.uk:Database:sgd;A_06_P5280||www.chem.agilent.com:Database:agp		A_06_P5280	1084963	OLIGO	15.028333357	1.128888888	72	7	1	714			1571	153	1	.06279261856	1	1	0	0	0	0	0	0	0	0	0	478.5375	783.5595	1	9.572917	22.10487
715					PIP2	15	C	1023208	1020218	peroxisome organization and biogenesis*	DNA binding*					YOR363C	YOR363C||ebi.ac.uk:Database:sgd;A_06_P6727||www.chem.agilent.com:Database:agp		A_06_P6727	1081665	OLIGO	15.240000024	1.128888888	73	7	1	715			1592	152	1	.06665306396	1	1	0	0	0	0	0	0	0	0	1	513.984	472.4292	1	15.317	21.98855
716					ATR1	13	W	38196	39824	multidrug transport	multidrug efflux pump activity					YML116W	YML116W||ebi.ac.uk:Database:sgd;A_06_P5409||www.chem.agilent.com:Database:agp		A_06_P5409	1081529	OLIGO	15.451666691	1.128888888	74	7	1	716			1613	153	1	.06206431951	1	1	0	0	0	0	0	0	0	0	0	496.181	972.5799	1	14.33905	22.41971
717						11	W	452	799							YKL225W	YKL225W||ebi.ac.uk:Database:sgd;A_06_P4637||www.chem.agilent.com:Database:agp		A_06_P4637	1080746	OLIGO	15.663333358	1.128888888	75	7	1	717			1634	152	1	.3903849741	1	1	0	0	0	0	0	0	0	0	1	62.87178	51.93275	1	6.940799	22.95926
718																	E1A_r60_a22||AgilentControlDB;(+)E1A_r60_a22||AgilentControlDB		(+)E1A_R60_A22	1545265	CONTROL	15.875000025	1.128888888	76	7	1	718			1656	153	1	.2780667119	1	1	0	0	0	0	0	0	0	0	0	101.2677	63.78246	1	6.442464	22.51685
719					REV3	16	C	237106	232592	DNA repair*	zeta DNA polymerase activity					YPL167C	YPL167C||ebi.ac.uk:Database:sgd;A_06_P6926||www.chem.agilent.com:Database:agp		A_06_P6926	1081058	OLIGO	16.086666692	1.128888888	77	7	1	719			1676	152	1	.07055334309	1	1	0	0	0	0	0	0	0	0	1	457.5738	419.6328	1	12.11185	22.67148
720					SPT23	11	C	401723	398475	positive regulation of transcription from RNA polymerase II promoter*	DNA binding*					YKL020C	YKL020C||ebi.ac.uk:Database:sgd;A_06_P4428||www.chem.agilent.com:Database:agp		A_06_P4428	1086358	OLIGO	16.298333359	1.128888888	78	7	1	720			1698	154	1	.05105484487	1	1	0	0	0	0	0	0	0	0	1	1722.297	1560.491	1	26.94099	22.11232
721						16	W	126006	126446	biological process unknown	molecular function unknown					YPL225W	YPL225W||ebi.ac.uk:Database:sgd;A_06_P6985||www.chem.agilent.com:Database:agp		A_06_P6985	1083601	OLIGO	16.510000026	1.128888888	79	7	1	721			1719	152	1	.04943813445	1	1	0	0	0	0	0	0	0	0	1	6672.927	5851.934	1	88.9603	23.17407
722					HHF2	14	W	576726	577037	chromatin assembly or disassembly	DNA binding					YNL030W	YNL030W||ebi.ac.uk:Database:sgd;A_06_P5801||www.chem.agilent.com:Database:agp		A_06_P5801	1081454	OLIGO	16.721666693	1.128888888	80	7	1	722			1740	153	1	.04920688952	1	1	0	0	0	0	0	0	0	0	1	11146.98	11810.07	1	130.8788	22.61905
723						15	C	841820	841512							YOR277C	YOR277C||ebi.ac.uk:Database:sgd;A_06_P6638||www.chem.agilent.com:Database:agp		A_06_P6638	1086626	OLIGO	16.93333336	1.128888888	81	7	1	723			1760	152	1	.1580555773	1	1	0	0	0	0	0	0	0	0	1	135.4399	160.4918	1	7.09748	22.3405
724					CLB2	16	W	771651	773126	G2/M transition of mitotic cell cycle*	cyclin-dependent protein kinase regulator activity					YPR119W	YPR119W||ebi.ac.uk:Database:sgd;A_06_P7166||www.chem.agilent.com:Database:agp		A_06_P7166	1085669	OLIGO	17.145000027	1.128888888	82	7	1	724			1782	154	1	.05324008108	1	1	0	0	0	0	0	0	0	0	1	1037.14	1160.63	1	17.35758	22.12409
726						4	C	1249811	1248144	biological process unknown	permease activity					YDR387C	YDR387C||ebi.ac.uk:Database:sgd;A_06_P2380||www.chem.agilent.com:Database:agp		A_06_P2380	1086024	OLIGO	17.568333361	1.128888888	84	7	1	726			1825	153	1	.05084930362	1	1	0	0	0	0	0	0	0	0	1	1680.088	1707.806	1	26.65777	22.29588
727						15	W	427818	428159							YOR053W	YOR053W||ebi.ac.uk:Database:sgd;A_06_P6415||www.chem.agilent.com:Database:agp		A_06_P6415	1082024	OLIGO	17.780000028	1.128888888	85	7	1	727			1846	153	1	.07357978509	1	1	0	0	0	0	0	0	0	0	0	493.3034	343.3921	1	10.10725	22.25182
728					MNN4	11	C	67467	63931	response to stress*	molecular function unknown					YKL201C	YKL201C||ebi.ac.uk:Database:sgd;A_06_P4613||www.chem.agilent.com:Database:agp		A_06_P4613	1081977	OLIGO	17.991666695	1.128888888	86	7	1	728			1867	154	1	.05079324218	1	1	0	0	0	0	0	0	0	0	1	1724.922	1718.108	1	31.98105	22.07491
729					VPS45	7	C	330610	328877	protein complex assembly*	unfolded protein binding					YGL095C	YGL095C||ebi.ac.uk:Database:sgd;A_06_P3050||www.chem.agilent.com:Database:agp		A_06_P3050	1086146	OLIGO	18.203333362	1.128888888	87	7	1	729			1888	153	1	.05841936852	1	1	0	0	0	0	0	0	0	0	0	799.5605	643.3056	1	19.08229	22.21612
730					NSE3	4	W	1037189	1038100	DNA repair	DNA binding					YDR288W	YDR288W||ebi.ac.uk:Database:sgd;A_06_P2277||www.chem.agilent.com:Database:agp		A_06_P2277	1080890	OLIGO	18.415000029	1.128888888	88	7	1	730			1909	154	1	.05848294712	1	1	0	0	0	0	0	0	0	0	0	982.8557	619.9114	1	18.93056	22.171
731					ENT5	4	C	767966	766731	Golgi to endosome transport*	clathrin binding					YDR153C	YDR153C||ebi.ac.uk:Database:sgd;A_06_P2141||www.chem.agilent.com:Database:agp		A_06_P2141	1085507	OLIGO	18.626666696	1.128888888	89	7	1	731			1930	152	1	.05599532459	1	1	0	0	0	0	0	0	0	0	0	947.4121	764.8507	1	17.89724	22.49458
732																	E1A_r60_n9||AgilentControlDB;(+)E1A_r60_n9||AgilentControlDB		(+)E1A_R60_N9	1545267	CONTROL	18.838333363	1.128888888	90	7	1	732			1952	154	1	.5105319793	1	1	0	0	0	0	0	0	0	1	0	60.55604	30.22897	1	5.537746	22.85614
733					THS1	9	W	212496	214700	protein biosynthesis	threonine-tRNA ligase activity					YIL078W	YIL078W||ebi.ac.uk:Database:sgd;A_06_P3878||www.chem.agilent.com:Database:agp		A_06_P3878	1086489	OLIGO	19.05000003	1.128888888	91	7	1	733			1973	152	1	.04916539268	1	1	0	0	0	0	0	0	0	0	1	14835.34	15269.88	1	209.4519	22.64388
734					SAC7	4	W	1252527	1254491	small GTPase mediated signal transduction*	signal transducer activity*					YDR389W	YDR389W||ebi.ac.uk:Database:sgd;A_06_P2382||www.chem.agilent.com:Database:agp		A_06_P2382	1081020	OLIGO	19.261666697	1.128888888	92	7	1	734			1994	153	1	.1020429621	1	1	0	0	0	0	0	0	0	0	1	229.0075	268.3925	1	7.881043	22.51852
735						12	C	136298	134301	biological process unknown	molecular function unknown					YLL007C	YLL007C||ebi.ac.uk:Database:sgd;A_06_P4751||www.chem.agilent.com:Database:agp		A_06_P4751	1082592	OLIGO	19.473333364	1.128888888	93	7	1	735			2015	152	1	.1279477043	1	1	0	0	0	0	0	0	0	0	1	216.5661	162.3328	1	9.002465	22.7658
736					RPL30	7	W	439096	439643	protein biosynthesis*	structural constituent of ribosome					YGL030W	YGL030W||ebi.ac.uk:Database:sgd;A_06_P2985||www.chem.agilent.com:Database:agp		A_06_P2985	1085469	OLIGO	19.685000031	1.128888888	94	7	1	736			2036	153	1	.05180730627	1	1	0	0	0	0	0	0	0	0	1	38082.43	63862.9	1	499.8614	22.35424
737						12	W	66561	66941							YLL037W	YLL037W||ebi.ac.uk:Database:sgd;A_06_P4782||www.chem.agilent.com:Database:agp		A_06_P4782	1085153	OLIGO	19.896666698	1.128888888	95	7	1	737			2057	153	1	.553927984	1	1	0	0	0	0	0	0	0	0	1	38.47817	41.90067	1	6.532877	22.24908
738						7	C	311936	311508							YGL102C	YGL102C||ebi.ac.uk:Database:sgd;A_06_P3057||www.chem.agilent.com:Database:agp		A_06_P3057	1083840	OLIGO	20.108333365	1.128888888	96	7	1	738			2079	153	1	.04982506131	1	1	0	0	0	0	0	0	0	0	1	3827.185	4683.174	1	47.94282	22.54255
739																	(+)E1A_r60_3||AgilentControlDB;E1A_r60_3||AgilentControlDB		(+)E1A_R60_3	1545261	CONTROL	20.320000032	1.128888888	97	7	1	739			2100	152	1	.6572384608	1	1	0	0	0	0	0	0	0	0	0	34.97249	32.67861	1	4.862318	22.35662
740					HMO1	4	W	812105	812845	plasmid maintenance	single-stranded DNA binding*					YDR174W	YDR174W||ebi.ac.uk:Database:sgd;A_06_P2162||www.chem.agilent.com:Database:agp		A_06_P2162	1082433	OLIGO	20.531666699	1.128888888	98	7	1	740			2121	153	1	.05005466743	1	1	0	0	0	0	0	0	0	0	1	2644.411	2363.034	1	44.56151	22.52555
741						7	W	349619	350443	biological process unknown	molecular function unknown					YGL085W	YGL085W||ebi.ac.uk:Database:sgd;A_06_P3040||www.chem.agilent.com:Database:agp		A_06_P3040	1086743	OLIGO	20.743333366	1.128888888	99	7	1	741			2143	152	1	.06855717088	1	1	0	0	0	0	0	0	0	0	1	478.9075	449.259	1	14.06003	22.46296
742						16	W	479222	480172	biological process unknown	molecular function unknown					YPL039W	YPL039W||ebi.ac.uk:Database:sgd;A_06_P6798||www.chem.agilent.com:Database:agp		A_06_P6798	1082808	OLIGO	20.955000033	1.128888888	100	7	1	742			2164	153	1	.05625773744	1	1	0	0	0	0	0	0	0	0	0	757.2106	895.8343	1	13.70666	22.76015
743					CSG2	2	C	310313	309081	calcium ion homeostasis*	enzyme regulator activity					YBR036C	YBR036C||ebi.ac.uk:Database:sgd;A_06_P1283||www.chem.agilent.com:Database:agp		A_06_P1283	1085710	OLIGO	21.1666667	1.128888888	101	7	1	743			2184	153	1	.04960861893	1	1	0	0	0	0	0	0	0	0	1	6224.169	7526.71	1	86.96741	22.43214
744					CTK1	11	W	182963	184549	protein amino acid phosphorylation*	protein kinase activity*					YKL139W	YKL139W||ebi.ac.uk:Database:sgd;A_06_P4551||www.chem.agilent.com:Database:agp		A_06_P4551	1082151	OLIGO	21.378333367	1.128888888	102	7	1	744			2205	153	1	.0617419587	1	1	0	0	0	0	0	0	0	0	0	655.6519	547.2485	1	15.19547	22.91144
745						16	W	199094	199375	protein biosynthesis	structural constituent of ribosome					YPL183W-A	YPL183W-A||ebi.ac.uk:Database:sgd;A_06_P6943||www.chem.agilent.com:Database:agp		A_06_P6943	1081326	OLIGO	21.590000034	1.128888888	103	7	1	745			2227	152	1	.05475202277	1	1	0	0	0	0	0	0	0	0	0	903.4613	1423.115	1	16.68675	22.9387
746																	(+)E1A_r60_1||AgilentControlDB;E1A_r60_1||AgilentControlDB		(+)E1A_R60_1	1545263	CONTROL	21.801666701	1.128888888	104	7	1	746			2248	154	1	.2608610374	1	1	0	0	0	0	0	0	0	0	0	71.15585	104.1239	1	6.771154	22.64444
747						15	W	605873	606178							YOR146W	YOR146W||ebi.ac.uk:Database:sgd;A_06_P6508||www.chem.agilent.com:Database:agp		A_06_P6508	1081742	OLIGO	22.013333368	1.128888888	105	7	1	747			2269	152	1	.524854434	1	1	0	0	0	0	0	0	0	0	1	57.22654	30.45037	1	7.177483	22.39852
748					RPS28B	12	W	673133	673336	protein biosynthesis	structural constituent of ribosome					YLR264W	YLR264W||ebi.ac.uk:Database:sgd;A_06_P5079||www.chem.agilent.com:Database:agp		A_06_P5079	1081676	OLIGO	22.225000035	1.128888888	106	7	1	748			2290	153	1	.05133563681	1	1	0	0	0	0	0	0	0	0	0	2223.87	3291.475	1	30.20425	22.67279
749					SFT1	11	C	430275	429841	intra-Golgi transport	v-SNARE activity					YKL006C-A	YKL006C-A||ebi.ac.uk:Database:sgd;A_06_P4412||www.chem.agilent.com:Database:agp		A_06_P4412	1086439	OLIGO	22.436666702	1.128888888	107	7	1	749			2311	153	1	.05213241806	1	1	0	0	0	0	0	0	0	0	1	1229.595	1361.24	1	16.6968	21.71642
750					DED81	8	C	143550	141886	asparaginyl-tRNA aminoacylation	ATP binding*					YHR019C	YHR019C||ebi.ac.uk:Database:sgd;A_06_P3589||www.chem.agilent.com:Database:agp		A_06_P3589	1082382	OLIGO	0	1.317037036	1	8	1	750			67	171	1	.04979318469	1	1	0	0	0	0	0	0	0	0	1	8841.926	11292.52	1	112.3707	21.48148
751					HSP10	15	C	370843	370523	protein folding	unfolded protein binding					YOR020C	YOR020C||ebi.ac.uk:Database:sgd;A_06_P6382||www.chem.agilent.com:Database:agp		A_06_P6382	1085030	OLIGO	.211666667	1.317037036	2	8	1	751			89	172	1	.05461165321	1	1	0	0	0	0	0	0	0	0	0	1543.22	3047.122	1	22.62483	22.01487
752					MCM6	7	C	120911	117858	DNA replication initiation*	chromatin binding*					YGL201C	YGL201C||ebi.ac.uk:Database:sgd;A_06_P3156||www.chem.agilent.com:Database:agp		A_06_P3156	1084191	OLIGO	.423333334	1.317037036	3	8	1	752			110	171	1	.05410089467	1	1	0	0	0	0	0	0	0	0	0	1122.451	921.2156	1	20.73421	22.06084
753					FUS3	2	W	192454	193515	protein amino acid phosphorylation*	MAP kinase activity					YBL016W	YBL016W||ebi.ac.uk:Database:sgd;A_06_P1145||www.chem.agilent.com:Database:agp		A_06_P1145	1083939	OLIGO	.635000001	1.317037036	4	8	1	753			131	171	1	.06041679973	1	1	0	0	0	0	0	0	0	0	0	546.3328	855.6483	1	11.33852	22.01515
754					KEL3	16	C	46506	44551	biological process unknown	molecular function unknown					YPL263C	YPL263C||ebi.ac.uk:Database:sgd;A_06_P7024||www.chem.agilent.com:Database:agp		A_06_P7024	1085957	OLIGO	.846666668	1.317037036	5	8	1	754			153	171	1	.05156332238	1	1	0	0	0	0	0	0	0	0	1	1392.719	1452.124	1	20.21849	22.06154
755						10	W	550425	553232	biological process unknown	molecular function unknown					YJR061W	YJR061W||ebi.ac.uk:Database:sgd;A_06_P4304||www.chem.agilent.com:Database:agp		A_06_P4304	1082174	OLIGO	1.058333335	1.317037036	6	8	1	755			174	172	1	.05764996078	1	1	0	0	0	0	0	0	0	0	1	697.6814	785.3979	1	16.48271	21.67054
756						5	C	292201	291701							YER066C-A	YER066C-A||ebi.ac.uk:Database:sgd;A_06_P2696||www.chem.agilent.com:Database:agp		A_06_P2696	1081972	OLIGO	1.270000002	1.317037036	7	8	1	756			195	171	1	.6517509029	1	1	0	0	0	0	0	0	0	0	0	37.41326	30.98866	1	5.234072	21.98148
757					YSA1	2	C	461867	461172	biological process unknown	phosphoribosyl-ATP diphosphatase activity					YBR111C	YBR111C||ebi.ac.uk:Database:sgd;A_06_P1363||www.chem.agilent.com:Database:agp		A_06_P1363	1083696	OLIGO	1.481666669	1.317037036	8	8	1	757			216	172	1	.04995208308	1	1	0	0	0	0	0	0	0	0	1	3030.312	2635.624	1	50.55965	22.29286
758					REX2	12	C	260548	259739	RNA processing	3'-5' exonuclease activity					YLR059C	YLR059C||ebi.ac.uk:Database:sgd;A_06_P4871||www.chem.agilent.com:Database:agp		A_06_P4871	1081585	OLIGO	1.693333336	1.317037036	9	8	1	758			237	171	1	.06435274539	1	1	0	0	0	0	0	0	0	0	0	469.8737	633.7501	1	13.06811	22.52874
759					GWT1	10	C	262468	260996	GPI anchor biosynthesis	molecular function unknown					YJL091C	YJL091C||ebi.ac.uk:Database:sgd;A_06_P4113||www.chem.agilent.com:Database:agp		A_06_P4113	1084613	OLIGO	1.905000003	1.317037036	10	8	1	759			258	171	1	.05508215322	1	1	0	0	0	0	0	0	0	0	1	869.2391	915.2663	1	19.78723	22.22182
760					HTZ1	15	C	303983	303579	regulation of transcription from RNA polymerase II promoter*	chromatin binding					YOL012C	YOL012C||ebi.ac.uk:Database:sgd;A_06_P6202||www.chem.agilent.com:Database:agp		A_06_P6202	1084311	OLIGO	2.11666667	1.317037036	11	8	1	760			280	171	1	.04941572196	1	1	0	0	0	0	0	0	0	0	1	4257.233	4197.378	1	60.2448	22.33708
761					RRN10	2	W	171484	171921	transcription from RNA polymerase I promoter	RNA polymerase I transcription factor activity*					YBL025W	YBL025W||ebi.ac.uk:Database:sgd;A_06_P1154||www.chem.agilent.com:Database:agp		A_06_P1154	1082528	OLIGO	2.328333337	1.317037036	12	8	1	761			301	171	1	.1796675505	1	1	0	0	0	0	0	0	0	0	0	170.5932	94.76604	1	8.514609	22.23741
762					CDC33	15	C	61023	60382	translational initiation*	translation initiation factor activity					YOL139C	YOL139C||ebi.ac.uk:Database:sgd;A_06_P6332||www.chem.agilent.com:Database:agp		A_06_P6332	1085626	OLIGO	2.540000004	1.317037036	13	8	1	762			322	171	1	.04956546959	1	1	0	0	0	0	0	0	0	0	1	9298.224	7702.546	1	131.2274	22.49451
763						15	W	847450	848142	biological process unknown	molecular function unknown					YOR283W	YOR283W||ebi.ac.uk:Database:sgd;A_06_P6644||www.chem.agilent.com:Database:agp		A_06_P6644	1082785	OLIGO	2.751666671	1.317037036	14	8	1	763			343	172	1	.05076345283	1	1	0	0	0	0	0	0	0	0	0	3298.795	2402.384	1	43.28854	22.18491
764					UPF3	7	W	634308	635471	mRNA catabolism*	molecular function unknown					YGR072W	YGR072W||ebi.ac.uk:Database:sgd;A_06_P3292||www.chem.agilent.com:Database:agp		A_06_P3292	1083750	OLIGO	2.963333338	1.317037036	15	8	1	764			364	171	1	.05481000828	1	1	0	0	0	0	0	0	0	0	0	1169.72	851.9224	1	20.66779	22.38095
765					ELA1	14	C	218661	217522	RNA elongation from RNA polymerase II promoter	transcriptional elongation regulator activity					YNL230C	YNL230C||ebi.ac.uk:Database:sgd;A_06_P6002||www.chem.agilent.com:Database:agp		A_06_P6002	1083938	OLIGO	3.175000005	1.317037036	16	8	1	765			385	172	1	.2178448456	1	1	0	0	0	0	0	0	0	0	1	95.66413	113.7629	1	6.181534	21.93818
766					RPS3	14	W	302680	303402	protein biosynthesis*	structural constituent of ribosome					YNL178W	YNL178W||ebi.ac.uk:Database:sgd;A_06_P5950||www.chem.agilent.com:Database:agp		A_06_P5950	1084154	OLIGO	3.386666672	1.317037036	17	8	1	766			406	170	1	.04920117812	1	1	0	0	0	0	0	0	0	0	1	67507.94	62328.85	1	804.823	21.94526
767						13	W	907362	910784	biological process unknown	molecular function unknown					YMR317W	YMR317W||ebi.ac.uk:Database:sgd;A_06_P5762||www.chem.agilent.com:Database:agp		A_06_P5762	1086717	OLIGO	3.598333339	1.317037036	18	8	1	767			428	172	1	.283694475	1	1	0	0	0	0	0	0	0	0	1	61.80182	100.1345	1	7.01526	22.0605
768					TSC13	4	C	426931	425999	very-long-chain fatty acid metabolism	oxidoreductase activity					YDL015C	YDL015C||ebi.ac.uk:Database:sgd;A_06_P1743||www.chem.agilent.com:Database:agp		A_06_P1743	1086311	OLIGO	3.810000006	1.317037036	19	8	1	768			449	171	1	.04959727199	1	1	0	0	0	0	0	0	0	0	1	8857.394	7291.614	1	156.9778	22.36122
769						4	W	769926	770327							YDR157W	YDR157W||ebi.ac.uk:Database:sgd;A_06_P2145||www.chem.agilent.com:Database:agp		A_06_P2145	1082768	OLIGO	4.021666673	1.317037036	20	8	1	769			470	172	1	.2038362613	1	1	0	0	0	0	0	0	0	0	1	85.64265	144.2596	1	6.462935	22.37589
770					TIM22	4	C	68607	67984	mitochondrial inner membrane protein import	protein transporter activity					YDL217C	YDL217C||ebi.ac.uk:Database:sgd;A_06_P1952||www.chem.agilent.com:Database:agp		A_06_P1952	1080645	OLIGO	4.23333334	1.317037036	21	8	1	770			491	171	1	.060054938	1	1	0	0	0	0	0	0	0	0	1	597.8456	702.9764	1	12.20772	22.20956
771						14	C	637335	636931							YNR005C	YNR005C||ebi.ac.uk:Database:sgd;A_06_P6116||www.chem.agilent.com:Database:agp		A_06_P6116	1080849	OLIGO	4.445000007	1.317037036	22	8	1	771			512	172	1	.6686024025	1	1	0	0	0	0	0	0	0	0	0	35.68759	30.89808	1	6.241019	22.19065
772					DST1	7	W	417487	418416	meiotic recombination*	positive transcription elongation factor activity					YGL043W	YGL043W||ebi.ac.uk:Database:sgd;A_06_P2998||www.chem.agilent.com:Database:agp		A_06_P2998	1080904	OLIGO	4.656666674	1.317037036	23	8	1	772			534	171	1	.05690408519	1	1	0	0	0	0	0	0	0	0	1	785.7761	759.6032	1	15.93368	22.10305
773					GPA1	8	C	114911	113493	signal transduction during conjugation with cellular fusion	GTPase activity					YHR005C	YHR005C||ebi.ac.uk:Database:sgd;A_06_P3574||www.chem.agilent.com:Database:agp		A_06_P3574	1082268	OLIGO	4.868333341	1.317037036	24	8	1	773			555	172	1	.05154406576	1	1	0	0	0	0	0	0	0	0	1	1555.198	1381.075	1	20.82761	22.03273
774					YIP5	7	C	200148	199216	vesicle-mediated transport	Rab GTPase binding					YGL161C	YGL161C||ebi.ac.uk:Database:sgd;A_06_P3116||www.chem.agilent.com:Database:agp		A_06_P3116	1082331	OLIGO	5.080000008	1.317037036	25	8	1	774			576	171	1	.0496772081	1	1	0	0	0	0	0	1	0	0	1	4933.923	4155.087	1	72.61132	22.39114
775					MET1	11	W	571254	573035	methionine metabolism*	uroporphyrin-III C-methyltransferase activity					YKR069W	YKR069W||ebi.ac.uk:Database:sgd;A_06_P4707||www.chem.agilent.com:Database:agp		A_06_P4707	1084552	OLIGO	5.291666675	1.317037036	26	8	1	775			597	172	1	.04940914596	1	1	0	0	0	0	0	0	0	0	1	5540.515	6200.835	1	82.21842	22.20213
776					DSE1	5	C	409059	407338	cell wall organization and biogenesis	molecular function unknown					YER124C	YER124C||ebi.ac.uk:Database:sgd;A_06_P2757||www.chem.agilent.com:Database:agp		A_06_P2757	1085570	OLIGO	5.503333342	1.317037036	27	8	1	776			618	171	1	.04990783009	1	1	0	0	0	0	0	0	0	0	1	10485.01	8042.932	1	169.9834	22.15326
777						16	W	843258	844016	biological process unknown	molecular function unknown					YPR158W	YPR158W||ebi.ac.uk:Database:sgd;A_06_P7206||www.chem.agilent.com:Database:agp		A_06_P7206	1082879	OLIGO	5.715000009	1.317037036	28	8	1	777			639	172	1	.09194025753	1	1	0	0	0	0	0	0	0	0	1	319.2531	255.7836	1	9.078296	22.31227
778						5	W	251727	253661	biological process unknown	molecular function unknown					YER049W	YER049W||ebi.ac.uk:Database:sgd;A_06_P2676||www.chem.agilent.com:Database:agp		A_06_P2676	1084443	OLIGO	5.926666676	1.317037036	29	8	1	778			661	171	1	.04936326171	1	1	0	0	0	0	0	0	0	0	1	7061.626	6344.105	1	108.1134	22.35821
779					NRG1	4	C	543366	542671	regulation of transcription from RNA polymerase II promoter*	DNA binding*					YDR043C	YDR043C||ebi.ac.uk:Database:sgd;A_06_P2030||www.chem.agilent.com:Database:agp		A_06_P2030	1086826	OLIGO	6.138333343	1.317037036	30	8	1	779			682	172	1	.05211028077	1	1	0	0	0	0	0	0	0	0	1	1416.869	1230.436	1	17.30457	22.42481
780						7	W	513163	514344	biological process unknown	cysteine synthase activity					YGR012W	YGR012W||ebi.ac.uk:Database:sgd;A_06_P3232||www.chem.agilent.com:Database:agp		A_06_P3232	1080757	OLIGO	6.35000001	1.317037036	31	8	1	780			703	171	1	.06786093819	1	1	0	0	0	0	0	0	0	0	1	445.941	505.6596	1	10.15881	22.19403
781					HST2	16	C	526880	525807	chromatin silencing at telomere	NAD-dependent histone deacetylase activity					YPL015C	YPL015C||ebi.ac.uk:Database:sgd;A_06_P6774||www.chem.agilent.com:Database:agp		A_06_P6774	1086604	OLIGO	6.561666677	1.317037036	32	8	1	781			724	171	1	.05539266084	1	1	0	0	0	0	0	0	0	0	0	802.2779	1125.516	1	14.02068	22.37165
782					BDP1	14	W	555047	556831	transcription initiation from RNA polymerase III promoter	RNA polymerase III transcription factor activity					YNL039W	YNL039W||ebi.ac.uk:Database:sgd;A_06_P5810||www.chem.agilent.com:Database:agp		A_06_P5810	1081780	OLIGO	6.773333344	1.317037036	33	8	1	782			745	171	1	.05392220523	1	1	0	0	0	0	0	0	0	0	0	2125.384	1222.025	1	36.20202	22.77289
783					URA2	10	C	172285	165641	'de novo' pyrimidine base biosynthesis*	aspartate carbamoyltransferase activity					YJL130C	YJL130C||ebi.ac.uk:Database:sgd;A_06_P4151||www.chem.agilent.com:Database:agp		A_06_P4151	1086647	OLIGO	6.985000011	1.317037036	34	8	1	783			766	171	1	.0525481431	1	1	0	0	0	0	0	0	0	0	1	23870.06	13296.39	1	299.2227	22.78467
784					APM1	16	C	52671	51244	vesicle-mediated transport	clathrin binding					YPL259C	YPL259C||ebi.ac.uk:Database:sgd;A_06_P7020||www.chem.agilent.com:Database:agp		A_06_P7020	1082459	OLIGO	7.196666678	1.317037036	35	8	1	784			787	171	1	.06519391889	1	1	0	0	0	0	0	0	0	0	1	509.3676	525.3495	1	10.85049	22.48047
785						4	W	18959	19312							YDL242W	YDL242W||ebi.ac.uk:Database:sgd;A_06_P1978||www.chem.agilent.com:Database:agp		A_06_P1978	1082964	OLIGO	7.408333345	1.317037036	36	8	1	785			809	171	1	.6529903047	1	1	0	0	0	0	0	0	0	0	0	37.45013	30.83436	1	4.843653	22.76866
786					RPP0	12	W	805887	806825	translational elongation*	structural constituent of ribosome					YLR340W	YLR340W||ebi.ac.uk:Database:sgd;A_06_P5157||www.chem.agilent.com:Database:agp		A_06_P5157	1086258	OLIGO	7.620000012	1.317037036	37	8	1	786			830	171	1	.0494397581	1	1	0	0	0	0	0	0	0	0	1	105112.8	124931.8	1	860.458	22.64815
787					NNF2	7	W	656964	659774	chromosome segregation	molecular function unknown					YGR089W	YGR089W||ebi.ac.uk:Database:sgd;A_06_P3309||www.chem.agilent.com:Database:agp		A_06_P3309	1086703	OLIGO	7.831666679	1.317037036	38	8	1	787			851	172	1	.05094524104	1	1	0	0	0	0	0	0	0	0	0	2094.515	1700.198	1	40.69303	22.11236
788					MSH4	6	C	137152	134516	meiotic recombination	DNA binding					YFL003C	YFL003C||ebi.ac.uk:Database:sgd;A_06_P2826||www.chem.agilent.com:Database:agp		A_06_P2826	1080759	OLIGO	8.043333346	1.317037036	39	8	1	788			873	170	1	.6123759621	1	1	0	0	0	0	0	0	0	0	1	38.96517	33.77063	1	5.843291	22.33569
789					NOT5	16	W	690104	691786	regulation of transcription from RNA polymerase II promoter*	3'-5'-exoribonuclease activity					YPR072W	YPR072W||ebi.ac.uk:Database:sgd;A_06_P7118||www.chem.agilent.com:Database:agp		A_06_P7118	1082375	OLIGO	8.255000013	1.317037036	40	8	1	789			894	172	1	.05160627115	1	1	0	0	0	0	0	0	0	0	1	1456.559	1373.1	1	21.26467	22.4697
790						12	C	229583	228909	biological process unknown	molecular function unknown					YLR040C	YLR040C||ebi.ac.uk:Database:sgd;A_06_P4852||www.chem.agilent.com:Database:agp		A_06_P4852	1085039	OLIGO	8.46666668	1.317037036	41	8	1	790			914	171	1	.3249231954	1	1	0	0	0	0	0	0	0	0	1	50.55504	91.74465	1	5.004757	22.69118
791					EMP70	12	C	296095	294092	transport	transporter activity					YLR083C	YLR083C||ebi.ac.uk:Database:sgd;A_06_P4895||www.chem.agilent.com:Database:agp		A_06_P4895	1084231	OLIGO	8.678333347	1.317037036	42	8	1	791			935	172	1	.04925387231	1	1	0	0	0	0	0	0	0	0	1	8179.092	8768.4	1	121.3624	22.69118
792					RPS16A	13	W	551927	552902	protein biosynthesis	structural constituent of ribosome					YMR143W	YMR143W||ebi.ac.uk:Database:sgd;A_06_P5575||www.chem.agilent.com:Database:agp		A_06_P5575	1084996	OLIGO	8.890000014	1.317037036	43	8	1	792			957	170	1	.0496848811	1	1	0	0	0	0	0	0	0	0	1	16847.79	21193.02	1	210.2425	22.53077
793					SUI3	16	W	100496	101353	translational initiation	translation initiation factor activity					YPL237W	YPL237W||ebi.ac.uk:Database:sgd;A_06_P6997||www.chem.agilent.com:Database:agp		A_06_P6997	1083102	OLIGO	9.101666681	1.317037036	44	8	1	793			978	172	1	.05086954272	1	1	0	0	0	0	0	0	0	0	1	9554.056	6370.348	1	127.0465	22.53731
794						4	C	625993	625061	biological process unknown	molecular function unknown					YDR090C	YDR090C||ebi.ac.uk:Database:sgd;A_06_P2078||www.chem.agilent.com:Database:agp		A_06_P2078	1086107	OLIGO	9.313333348	1.317037036	45	8	1	794			999	171	1	.06277571506	1	1	0	0	0	0	0	0	0	0	0	845.0051	474.6932	1	17.19268	22.58845
795					PTI1	7	W	800551	801828	mRNA polyadenylylation*	RNA binding					YGR156W	YGR156W||ebi.ac.uk:Database:sgd;A_06_P3377||www.chem.agilent.com:Database:agp		A_06_P3377	1084296	OLIGO	9.525000015	1.317037036	46	8	1	795			1020	172	1	.07776705775	1	1	0	0	0	0	0	0	0	0	1	372.7652	362.6343	1	10.48559	22.68519
796					DMC1	5	W	548416	549512	meiosis*	single-stranded DNA binding*					YER179W	YER179W||ebi.ac.uk:Database:sgd;A_06_P2811||www.chem.agilent.com:Database:agp		A_06_P2811	1085741	OLIGO	9.736666682	1.317037036	47	8	1	796			1042	171	1	.2341647073	1	1	0	0	0	0	0	0	0	0	1	80.54316	115.3611	1	6.855935	22.75564
797					VHS2	9	C	96375	95065	G1/S transition of mitotic cell cycle	molecular function unknown					YIL135C	YIL135C||ebi.ac.uk:Database:sgd;A_06_P3934||www.chem.agilent.com:Database:agp		A_06_P3934	1085625	OLIGO	9.948333349	1.317037036	48	8	1	797			1063	172	1	.05558244858	1	1	0	0	0	0	0	0	0	0	1	815.383	906.2982	1	15.84159	22.93727
798					ARG1	15	W	219209	220471	arginine biosynthesis*	argininosuccinate synthase activity					YOL058W	YOL058W||ebi.ac.uk:Database:sgd;A_06_P6250||www.chem.agilent.com:Database:agp		A_06_P6250	1083656	OLIGO	10.160000016	1.317037036	49	8	1	798			1084	171	1	.05073017287	1	1	0	0	0	0	0	0	0	0	1	11453.65	16993.87	1	154.0351	22.60456
799					CDC26	6	W	226950	227324	mitotic sister chromatid segregation*	protein binding*					YFR036W	YFR036W||ebi.ac.uk:Database:sgd;A_06_P2934||www.chem.agilent.com:Database:agp		A_06_P2934	1083925	OLIGO	10.371666683	1.317037036	50	8	1	799			1105	171	1	.4856240683	1	1	0	0	0	0	0	0	0	0	1	46.95752	44.79721	1	6.47699	22.50763
800						6	W	836	1363	biological process unknown	molecular function unknown					YFL067W	YFL067W||ebi.ac.uk:Database:sgd;A_06_P2893||www.chem.agilent.com:Database:agp		A_06_P2893	1086790	OLIGO	10.58333335	1.317037036	51	8	1	800			1126	171	1	.1258872431	1	1	0	0	0	0	0	0	0	0	1	155.6021	234.6373	1	8.291974	22.52308
801					CAF120	14	W	113269	116451	regulation of transcription from RNA polymerase II promoter	molecular function unknown					YNL278W	YNL278W||ebi.ac.uk:Database:sgd;A_06_P6050||www.chem.agilent.com:Database:agp		A_06_P6050	1082400	OLIGO	10.795000017	1.317037036	52	8	1	801			1147	172	1	.06097783252	1	1	0	0	0	0	0	0	0	0	1	587.7863	644.4432	1	14.11435	22.38489
802					APT1	13	W	228937	229500	AMP biosynthesis*	adenine phosphoribosyltransferase activity					YML022W	YML022W||ebi.ac.uk:Database:sgd;A_06_P5312||www.chem.agilent.com:Database:agp		A_06_P5312	1083110	OLIGO	11.006666684	1.317037036	53	8	1	802			1169	171	1	.05150017108	1	1	0	0	0	0	0	0	0	0	0	4485.499	7179.57	1	50.702	22.28571
803					PHO91	14	C	651712	649028	phosphate transport	phosphate transporter activity					YNR013C	YNR013C||ebi.ac.uk:Database:sgd;A_06_P6124||www.chem.agilent.com:Database:agp		A_06_P6124	1081477	OLIGO	11.218333351	1.317037036	54	8	1	803			1189	172	1	.05345043382	1	1	0	0	0	0	0	0	0	0	0	999.7208	1183.752	1	18.01587	22.23048
804					MKC7	4	C	746096	744306	proteolysis and peptidolysis	aspartic-type signal peptidase activity					YDR144C	YDR144C||ebi.ac.uk:Database:sgd;A_06_P2132||www.chem.agilent.com:Database:agp		A_06_P2132	1084591	OLIGO	11.430000018	1.317037036	55	8	1	804			1210	171	1	.05597643342	1	1	0	0	0	0	0	0	0	0	0	765.0606	954.0797	1	16.43542	22.32353
805					MRP21	2	W	48822	49355	protein biosynthesis*	structural constituent of ribosome					YBL090W	YBL090W||ebi.ac.uk:Database:sgd;A_06_P1222||www.chem.agilent.com:Database:agp		A_06_P1222	1083467	OLIGO	11.641666685	1.317037036	56	8	1	805			1232	172	1	.05498208203	1	1	0	0	0	0	0	0	0	0	0	1039.951	837.5272	1	19.47968	22.76619
806						16	C	674697	674311							YPR059C	YPR059C||ebi.ac.uk:Database:sgd;A_06_P7105||www.chem.agilent.com:Database:agp		A_06_P7105	1083573	OLIGO	11.853333352	1.317037036	57	8	1	806			1253	171	1	.3206236558	1	1	0	0	0	0	0	0	0	0	1	61.1897	79.54727	1	5.45139	22.55253
807					STV1	13	W	383302	385974	vacuolar acidification	hydrogen-transporting ATPase activity, rotational mechanism					YMR054W	YMR054W||ebi.ac.uk:Database:sgd;A_06_P5481||www.chem.agilent.com:Database:agp		A_06_P5481	1081017	OLIGO	12.065000019	1.317037036	58	8	1	807			1274	172	1	.04937278612	1	1	0	0	0	0	0	0	0	0	1	4885.85	4675.512	1	79.90044	22.33208
808					HMI1	15	C	141346	139226	mitochondrial genome maintenance	ATP-dependent DNA helicase activity					YOL095C	YOL095C||ebi.ac.uk:Database:sgd;A_06_P6288||www.chem.agilent.com:Database:agp		A_06_P6288	1080970	OLIGO	12.276666686	1.317037036	59	8	1	808			1296	171	1	.06359635179	1	1	0	0	0	0	0	0	0	0	1	568.4253	531.2444	1	12.64665	22.39844
809						6	C	3846	3322	biological process unknown	molecular function unknown					YFL064C	YFL064C||ebi.ac.uk:Database:sgd;A_06_P2890||www.chem.agilent.com:Database:agp		A_06_P2890	1082196	OLIGO	12.488333353	1.317037036	60	8	1	809			1317	172	1	.08258880704	1	1	0	0	0	0	0	0	0	0	1	295.5915	380.5671	1	9.550394	22.58974
810						4	W	174919	176487	biological process unknown	molecular function unknown					YDL156W	YDL156W||ebi.ac.uk:Database:sgd;A_06_P1889||www.chem.agilent.com:Database:agp		A_06_P1889	1080988	OLIGO	12.70000002	1.317037036	61	8	1	810			1337	171	1	.06761575129	1	1	0	0	0	0	0	0	0	0	0	428.7403	542.4241	1	11.03784	22.87085
811						9	C	246912	246547							YIL059C	YIL059C||ebi.ac.uk:Database:sgd;A_06_P3859||www.chem.agilent.com:Database:agp		A_06_P3859	1080813	OLIGO	12.911666687	1.317037036	62	8	1	811			1359	172	1	.0814292866	1	1	0	0	0	0	0	0	0	0	1	309.8621	378.2198	1	10.00761	22.58889
812					CDC60	16	W	246989	250261	leucyl-tRNA aminoacylation	leucine-tRNA ligase activity					YPL160W	YPL160W||ebi.ac.uk:Database:sgd;A_06_P6919||www.chem.agilent.com:Database:agp		A_06_P6919	1082413	OLIGO	13.123333354	1.317037036	63	8	1	812			1380	171	1	.05006486107	1	1	0	0	0	0	0	0	0	0	1	11940.71	8889.478	1	136.4151	22.56204
813					STE20	8	C	97932	95113	protein amino acid phosphorylation*	protein serine/threonine kinase activity					YHL007C	YHL007C||ebi.ac.uk:Database:sgd;A_06_P3525||www.chem.agilent.com:Database:agp		A_06_P3525	1085525	OLIGO	13.335000021	1.317037036	64	8	1	813			1401	172	1	.05097404062	1	1	0	0	0	0	0	0	0	0	1	1660.932	2017.237	1	27.11377	22.75824
814					MET22	15	C	207175	206102	sulfate assimilation*	3'(2'),5'-bisphosphate nucleotidase activity					YOL064C	YOL064C||ebi.ac.uk:Database:sgd;A_06_P6256||www.chem.agilent.com:Database:agp		A_06_P6256	1082741	OLIGO	13.546666688	1.317037036	65	8	1	814			1423	171	1	.05116424352	1	1	0	0	0	0	0	0	0	0	1	1514.807	1674.127	1	16.76246	22.57196
815					ERG11	8	C	121677	120085	ergosterol biosynthesis	sterol 14-demethylase activity					YHR007C	YHR007C||ebi.ac.uk:Database:sgd;A_06_P3577||www.chem.agilent.com:Database:agp		A_06_P3577	1086033	OLIGO	13.758333355	1.317037036	66	8	1	815			1444	172	1	.04954882472	1	1	0	0	0	0	0	0	0	0	1	7637.552	9175.494	1	76.63949	22.37545
816					TAD3	12	C	766358	765266	tRNA modification	tRNA specific adenosine deaminase activity					YLR316C	YLR316C||ebi.ac.uk:Database:sgd;A_06_P5133||www.chem.agilent.com:Database:agp		A_06_P5133	1081991	OLIGO	13.970000022	1.317037036	67	8	1	816			1465	171	1	.0545705098	1	1	0	0	0	0	0	0	0	0	1	881.3576	1032.639	1	19.77894	22.3855
817						13	C	416052	415687							YMR075C-A	YMR075C-A||ebi.ac.uk:Database:sgd;A_06_P5502||www.chem.agilent.com:Database:agp		A_06_P5502	1085339	OLIGO	14.181666689	1.317037036	68	8	1	817			1486	172	1	.3518515234	1	1	0	0	0	0	0	0	0	0	1	65.39244	61.85423	1	6.566872	22.23529
818						15	C	375856	373709	biological process unknown	phospholipase activity					YOR022C	YOR022C||ebi.ac.uk:Database:sgd;A_06_P6384||www.chem.agilent.com:Database:agp		A_06_P6384	1086868	OLIGO	14.393333356	1.317037036	69	8	1	818			1508	171	1	.09539265763	1	1	0	0	0	0	0	0	0	0	1	288.751	254.6631	1	10.2492	22.42593
819					ECM23	16	W	511099	511662	pseudohyphal growth	molecular function unknown					YPL021W	YPL021W||ebi.ac.uk:Database:sgd;A_06_P6780||www.chem.agilent.com:Database:agp		A_06_P6780	1082770	OLIGO	14.605000023	1.317037036	70	8	1	819			1528	172	1	.65050836	1	1	0	0	0	0	0	0	0	0	0	33.93205	34.39745	1	4.048224	22.5303
820					BSC1	4	C	385584	384598	biological process unknown	molecular function unknown					YDL037C	YDL037C||ebi.ac.uk:Database:sgd;A_06_P1765||www.chem.agilent.com:Database:agp		A_06_P1765	1083457	OLIGO	14.81666669	1.317037036	71	8	1	820			1550	172	1	.7155865895	1	1	0	0	0	0	0	0	0	0	0	32.98273	29.1793	1	4.689586	22.67616
821					DBP6	14	W	695595	697484	35S primary transcript processing*	ATP-dependent RNA helicase activity					YNR038W	YNR038W||ebi.ac.uk:Database:sgd;A_06_P6151||www.chem.agilent.com:Database:agp		A_06_P6151	1086844	OLIGO	15.028333357	1.317037036	72	8	1	821			1571	172	1	.06116872705	1	1	0	0	0	0	0	0	0	0	1	564.8446	667.6135	1	14.2214	22.07664
822					UFE1	15	W	468213	469253	vesicle fusion*	t-SNARE activity					YOR075W	YOR075W||ebi.ac.uk:Database:sgd;A_06_P6437||www.chem.agilent.com:Database:agp		A_06_P6437	1081985	OLIGO	15.240000024	1.317037036	73	8	1	822			1592	171	1	.06206152858	1	1	0	0	0	0	0	0	0	0	0	801.1637	497.6299	1	14.60626	22.19557
823						7	W	359447	360103	biological process unknown	molecular function unknown					YGL079W	YGL079W||ebi.ac.uk:Database:sgd;A_06_P3034||www.chem.agilent.com:Database:agp		A_06_P3034	1083728	OLIGO	15.451666691	1.317037036	74	8	1	823			1613	172	1	.05769925738	1	1	0	0	0	0	0	0	0	0	1	735.7124	729.5878	1	16.89132	22.37455
824						14	W	570476	572314	biological process unknown	molecular function unknown					YNL034W	YNL034W||ebi.ac.uk:Database:sgd;A_06_P5805||www.chem.agilent.com:Database:agp		A_06_P5805	1083421	OLIGO	15.663333358	1.317037036	75	8	1	824			1634	171	1	.684670907	1	1	0	0	0	0	0	0	0	0	1	36.16255	29.00475	1	5.257481	22.9011
825					RVB2	16	W	103232	104647	regulation of transcription from RNA polymerase II promoter*	ATPase activity					YPL235W	YPL235W||ebi.ac.uk:Database:sgd;A_06_P6995||www.chem.agilent.com:Database:agp		A_06_P6995	1084807	OLIGO	15.875000025	1.317037036	76	8	1	825			1655	171	1	.05030447629	1	1	0	0	0	0	0	0	0	0	1	4011.297	3045.581	1	43.96951	22.17844
826						12	W	704311	704700							YLR279W	YLR279W||ebi.ac.uk:Database:sgd;A_06_P5094||www.chem.agilent.com:Database:agp		A_06_P5094	1083387	OLIGO	16.086666692	1.317037036	77	8	1	826			1676	171	1	.5977666473	1	1	0	0	0	0	0	0	0	0	1	37.35604	37.04088	1	5.647872	22.47312
827					ARP1	8	C	364155	363001	establishment of mitotic spindle orientation*	structural constituent of cytoskeleton					YHR129C	YHR129C||ebi.ac.uk:Database:sgd;A_06_P3704||www.chem.agilent.com:Database:agp		A_06_P3704	1086269	OLIGO	16.298333359	1.317037036	78	8	1	827			1698	172	1	.05921199483	1	1	0	0	0	0	0	0	0	0	1	720.0258	633.4166	1	15.33077	22.32584
828						4	W	1345637	1346029							YDR442W	YDR442W||ebi.ac.uk:Database:sgd;A_06_P2435||www.chem.agilent.com:Database:agp		A_06_P2435	1080879	OLIGO	16.510000026	1.317037036	79	8	1	828			1719	171	1	.6730615006	1	1	0	0	0	0	0	0	0	0	0	34.70054	31.38217	1	4.805177	22.77656
829						12	W	489574	489930	biological process unknown	molecular function unknown					YLR162W	YLR162W||ebi.ac.uk:Database:sgd;A_06_P4976||www.chem.agilent.com:Database:agp		A_06_P4976	1086245	OLIGO	16.721666693	1.317037036	80	8	1	829			1740	172	1	.06033977179	1	1	0	0	0	0	0	0	0	0	0	2691.04	7994.093	1	40.70537	22.5
830					TEA1	15	W	954339	956618	transcription	DNA binding					YOR337W	YOR337W||ebi.ac.uk:Database:sgd;A_06_P6701||www.chem.agilent.com:Database:agp		A_06_P6701	1081886	OLIGO	16.93333336	1.317037036	81	8	1	830			1761	171	1	.05984006339	1	1	0	0	0	0	0	0	0	0	0	577.5567	789.5993	1	14.29639	22.37363
831						4	W	296820	298274	biological process unknown	molecular function unknown					YDL089W	YDL089W||ebi.ac.uk:Database:sgd;A_06_P1819||www.chem.agilent.com:Database:agp		A_06_P1819	1083256	OLIGO	17.145000027	1.317037036	82	8	1	831			1782	172	1	.05806093507	1	1	0	0	0	0	0	0	0	0	0	874.928	645.1212	1	18.56237	22.55147
832					URB2	10	C	513677	510153	ribosome biogenesis*	molecular function unknown					YJR041C	YJR041C||ebi.ac.uk:Database:sgd;A_06_P4284||www.chem.agilent.com:Database:agp		A_06_P4284	1086526	OLIGO	17.356666694	1.317037036	83	8	1	832			1804	171	1	.05787586085	1	1	0	0	0	0	0	0	0	0	1	703.2893	749.5328	1	14.7526	22.23616
833						16	W	718377	718682							YPR092W	YPR092W||ebi.ac.uk:Database:sgd;A_06_P7139||www.chem.agilent.com:Database:agp		A_06_P7139	1081356	OLIGO	17.568333361	1.317037036	84	8	1	833			1825	172	1	.6552077397	1	1	0	0	0	0	0	0	0	0	0	31.57468	36.37571	1	5.293672	22.71223
834						7	C	720658	720269							YGR114C	YGR114C||ebi.ac.uk:Database:sgd;A_06_P3334||www.chem.agilent.com:Database:agp		A_06_P3334	1083936	OLIGO	17.780000028	1.317037036	85	8	1	834			1846	170	1	.5562873359	1	1	0	0	0	0	0	0	0	0	1	37.28187	42.83503	1	6.424441	22.79562
835						5	C	284220	282703	regulation of transcription	molecular function unknown					YER064C	YER064C||ebi.ac.uk:Database:sgd;A_06_P2694||www.chem.agilent.com:Database:agp		A_06_P2694	1084580	OLIGO	17.991666695	1.317037036	86	8	1	835			1867	172	1	.1339755138	1	1	0	0	0	0	0	0	0	0	0	123.4913	253.7651	1	8.212879	22.27715
836					MKK2	16	C	289033	287513	protein amino acid phosphorylation*	MAP kinase kinase activity					YPL140C	YPL140C||ebi.ac.uk:Database:sgd;A_06_P6899||www.chem.agilent.com:Database:agp		A_06_P6899	1082868	OLIGO	18.203333362	1.317037036	87	8	1	836			1888	171	1	.06476793653	1	1	0	0	0	0	0	0	0	0	0	609.8201	468.1306	1	19.82782	22.16788
837					SAM35	8	W	272628	273617	mitochondrial outer membrane protein import	protein binding					YHR083W	YHR083W||ebi.ac.uk:Database:sgd;A_06_P3658||www.chem.agilent.com:Database:agp		A_06_P3658	1084059	OLIGO	18.415000029	1.317037036	88	8	1	837			1909	172	1	.05002578687	1	1	0	0	0	0	0	0	0	0	1	2334.396	2405.876	1	45.00129	22.42647
838						9	C	200458	200150							YIL086C	YIL086C||ebi.ac.uk:Database:sgd;A_06_P3885||www.chem.agilent.com:Database:agp		A_06_P3885	1084527	OLIGO	18.626666696	1.317037036	89	8	1	838			1930	171	1	.06280584934	1	1	0	0	0	0	0	0	0	0	1	530.6593	611.8609	1	13.92153	22.41606
839					PCD1	12	C	442738	441716	biological process unknown	pyrophosphatase activity					YLR151C	YLR151C||ebi.ac.uk:Database:sgd;A_06_P4965||www.chem.agilent.com:Database:agp		A_06_P4965	1085124	OLIGO	18.838333363	1.317037036	90	8	1	839			1952	173	1	.08533229421	1	1	0	0	0	0	0	0	0	0	0	382.8737	267.8122	1	10.69104	22.40304
840					UBP14	2	C	356015	353670	protein deubiquitination*	ubiquitin-specific protease activity					YBR058C	YBR058C||ebi.ac.uk:Database:sgd;A_06_P1305||www.chem.agilent.com:Database:agp		A_06_P1305	1086368	OLIGO	19.05000003	1.317037036	91	8	1	840			1973	171	1	.05580618134	1	1	0	0	0	0	0	0	0	0	1	792.3404	908.2645	1	14.16821	22.41887
841					SIK1	12	W	546099	547613	rRNA modification*	molecular function unknown					YLR197W	YLR197W||ebi.ac.uk:Database:sgd;A_06_P5011||www.chem.agilent.com:Database:agp		A_06_P5011	1080843	OLIGO	19.261666697	1.317037036	92	8	1	841			1994	172	1	.04941564792	1	1	0	0	0	0	0	0	0	0	1	4381.33	4650.76	1	53.41231	22.61798
842					SHG1	2	C	730157	729729	histone methylation	histone lysine N-methyltransferase activity (H3-K4 specific)					YBR258C	YBR258C||ebi.ac.uk:Database:sgd;A_06_P1512||www.chem.agilent.com:Database:agp		A_06_P1512	1085937	OLIGO	19.473333364	1.317037036	93	8	1	842			2015	171	1	.08322762731	1	1	0	0	0	0	0	0	0	0	1	300.6636	363.8098	1	9.191339	22.48872
843					SNZ2	14	W	13267	14163	thiamin biosynthesis*	protein binding					YNL333W	YNL333W||ebi.ac.uk:Database:sgd;A_06_P6105||www.chem.agilent.com:Database:agp		A_06_P6105	1084487	OLIGO	19.685000031	1.317037036	94	8	1	843			2036	172	1	.05587656938	1	1	0	0	0	0	0	0	0	0	0	824.9686	1422.955	1	15.20058	22.05948
844						10	W	32163	33158	biological process unknown	molecular function unknown					YJL213W	YJL213W||ebi.ac.uk:Database:sgd;A_06_P4235||www.chem.agilent.com:Database:agp		A_06_P4235	1082813	OLIGO	19.896666698	1.317037036	95	8	1	844			2057	171	1	.2194155782	1	1	0	0	0	0	0	0	0	0	0	55.28331	178.8908	1	4.814238	22.56489
845						12	W	642629	644338	biological process unknown	molecular function unknown					YLR253W	YLR253W||ebi.ac.uk:Database:sgd;A_06_P5067||www.chem.agilent.com:Database:agp		A_06_P5067	1081115	OLIGO	20.108333365	1.317037036	96	8	1	845			2079	172	1	.05295481264	1	1	0	0	0	0	0	0	0	0	1	1207.621	1077.676	1	20.80391	22.56475
846					ABF1	11	W	226216	228411	DNA replication*	DNA binding*					YKL112W	YKL112W||ebi.ac.uk:Database:sgd;A_06_P4524||www.chem.agilent.com:Database:agp		A_06_P4524	1084431	OLIGO	20.320000032	1.317037036	97	8	1	846			2100	171	1	.0519642867	1	1	0	0	0	0	0	0	0	0	0	1708.236	1315.394	1	29.06184	22.42066
847					POL4	3	C	140930	139182	double-strand break repair via nonhomologous end-joining*	beta DNA polymerase activity					YCR014C	YCR014C||ebi.ac.uk:Database:sgd;A_06_P1635||www.chem.agilent.com:Database:agp		A_06_P1635	1081601	OLIGO	20.531666699	1.317037036	98	8	1	847			2121	172	1	.09983826869	1	1	0	0	0	0	0	0	0	0	0	312.7964	209.5805	1	8.978153	22.76046
848					PDR3	2	W	217473	220403	regulation of transcription from RNA polymerase II promoter*	DNA binding*					YBL005W	YBL005W||ebi.ac.uk:Database:sgd;A_06_P1134||www.chem.agilent.com:Database:agp		A_06_P1134	1084212	OLIGO	20.743333366	1.317037036	99	8	1	848			2143	171	1	.08471718016	1	1	0	0	0	0	0	0	0	0	1	370.4859	281.0814	1	9.306094	22.89179
849					PCL6	5	W	272622	273884	regulation of glycogen biosynthesis*	cyclin-dependent protein kinase regulator activity					YER059W	YER059W||ebi.ac.uk:Database:sgd;A_06_P2688||www.chem.agilent.com:Database:agp		A_06_P2688	1086466	OLIGO	20.955000033	1.317037036	100	8	1	849			2163	173	1	.07213672486	1	1	0	0	0	0	0	0	0	0	1	473.9063	376.9944	1	12.5506	22.94796
850						3	C	272859	272311	biological process unknown	molecular function unknown					YCR090C	YCR090C||ebi.ac.uk:Database:sgd;A_06_P1710||www.chem.agilent.com:Database:agp		A_06_P1710	1085930	OLIGO	21.1666667	1.317037036	101	8	1	850			2184	171	1	.06679066306	1	1	0	0	0	0	0	0	0	0	1	456.216	530.9229	1	12.16399	23
851					NUP100	11	W	309844	312723	mRNA-nucleus export*	structural molecule activity					YKL068W	YKL068W||ebi.ac.uk:Database:sgd;A_06_P4478||www.chem.agilent.com:Database:agp		A_06_P4478	1082696	OLIGO	21.378333367	1.317037036	102	8	1	851			2205	172	1	.06357010235	1	1	0	0	0	0	0	0	0	0	1	534.4504	565.7735	1	12.65079	22.92473
852					MER1	14	W	250930	251742	meiosis*	RNA splicing factor activity, transesterification mechanism					YNL210W	YNL210W||ebi.ac.uk:Database:sgd;A_06_P5982||www.chem.agilent.com:Database:agp		A_06_P5982	1086155	OLIGO	21.590000034	1.317037036	103	8	1	852			2227	171	1	.6788872164	1	1	0	0	0	0	0	0	0	0	0	35.17679	30.3978	1	5.795517	22.98141
853					BNS1	7	W	951896	952309	meiosis	molecular function unknown					YGR230W	YGR230W||ebi.ac.uk:Database:sgd;A_06_P3451||www.chem.agilent.com:Database:agp		A_06_P3451	1083424	OLIGO	21.801666701	1.317037036	104	8	1	853			2248	172	1	.07401457115	1	1	0	0	0	0	0	0	0	0	0	514.591	328.1282	1	16.51964	22.57312
854						14	W	182874	185177	cysteine metabolism*	cysteine-tRNA ligase activity					YNL247W	YNL247W||ebi.ac.uk:Database:sgd;A_06_P6019||www.chem.agilent.com:Database:agp		A_06_P6019	1080862	OLIGO	22.013333368	1.317037036	105	8	1	854			2269	171	1	.04951877359	1	1	0	0	0	0	0	0	0	0	1	3589.01	3618.947	1	51.15385	22.06569
855					COX14	13	C	14754	14542	aerobic respiration*	molecular function unknown					YML129C	YML129C||ebi.ac.uk:Database:sgd;A_06_P5423||www.chem.agilent.com:Database:agp		A_06_P5423	1081065	OLIGO	22.225000035	1.317037036	106	8	1	855			2290	172	1	.181066907	1	1	0	0	0	0	0	0	0	0	1	98.11258	162.7209	1	6.565835	22.32075
856					SEC6	9	C	235471	233054	cytokinesis*	protein binding					YIL068C	YIL068C||ebi.ac.uk:Database:sgd;A_06_P3868||www.chem.agilent.com:Database:agp		A_06_P3868	1086169	OLIGO	22.436666702	1.317037036	107	8	1	856			2312	171	1	.05336088676	1	1	0	0	0	0	0	0	0	0	1	1097.95	1039.567	1	23.98546	21.60465
857						1	C	39047	38697							YAL056C-A	YAL056C-A||ebi.ac.uk:Database:sgd;A_06_P1081||www.chem.agilent.com:Database:agp		A_06_P1081	1081366	OLIGO	0	1.505185184	1	9	1	857			67	190	1	.366794627	1	1	0	0	0	0	0	0	0	0	1	55.0501	67.3123	1	6.540193	21.45149
858						16	C	697499	697128							YPR077C	YPR077C||ebi.ac.uk:Database:sgd;A_06_P7124||www.chem.agilent.com:Database:agp		A_06_P7124	1080913	OLIGO	.211666667	1.505185184	2	9	1	858			89	190	1	.2210902635	1	1	0	0	0	0	0	0	0	0	0	67.04291	151.3951	1	6.318036	22.06844
859					MIR1	10	C	578104	577169	phosphate transport	inorganic phosphate transporter activity					YJR077C	YJR077C||ebi.ac.uk:Database:sgd;A_06_P4320||www.chem.agilent.com:Database:agp		A_06_P4320	1086599	OLIGO	.423333334	1.505185184	3	9	1	859			110	189	1	.04997003835	1	1	0	0	0	0	0	0	0	0	1	18405	24470.83	1	271.4414	22.27372
860						13	C	856792	855398	aerobic respiration	amidase activity					YMR293C	YMR293C||ebi.ac.uk:Database:sgd;A_06_P5733||www.chem.agilent.com:Database:agp		A_06_P5733	1081835	OLIGO	.635000001	1.505185184	4	9	1	860			131	191	1	.05784957251	1	1	0	0	0	0	0	0	0	0	0	660.031	856.0616	1	17.51777	22.44286
861					SET4	10	W	224972	226654	biological process unknown	molecular function unknown					YJL105W	YJL105W||ebi.ac.uk:Database:sgd;A_06_P4127||www.chem.agilent.com:Database:agp		A_06_P4127	1084811	OLIGO	.846666668	1.505185184	5	9	1	861			152	190	1	.5067241594	1	1	0	0	0	0	0	0	0	0	1	57.22268	32.9356	1	4.726745	22.11552
862						12	C	28305	27409	biological process unknown	molecular function unknown					YLL056C	YLL056C||ebi.ac.uk:Database:sgd;A_06_P4801||www.chem.agilent.com:Database:agp		A_06_P4801	1082336	OLIGO	1.058333335	1.505185184	6	9	1	862			174	190	1	.1127528418	1	1	0	0	0	0	0	0	0	0	1	223.6651	213.1994	1	9.048373	22.29889
863						2	C	321609	320416	phospholipid biosynthesis	acyltransferase activity					YBR042C	YBR042C||ebi.ac.uk:Database:sgd;A_06_P1289||www.chem.agilent.com:Database:agp		A_06_P1289	1085038	OLIGO	1.270000002	1.505185184	7	9	1	863			195	190	1	.05505224356	1	1	0	0	0	0	0	0	0	0	1	897.3263	887.8551	1	16.68532	22.39259
864					PPZ1	13	C	241536	239458	sodium ion homeostasis	protein serine/threonine phosphatase activity					YML016C	YML016C||ebi.ac.uk:Database:sgd;A_06_P5306||www.chem.agilent.com:Database:agp		A_06_P5306	1086045	OLIGO	1.481666669	1.505185184	8	9	1	864			216	191	1	.05173439213	1	1	0	0	0	0	0	0	0	0	1	1519.149	1325.492	1	27.90213	22.57678
865					SEC7	4	C	802217	796188	ER to Golgi transport*	ARF guanyl-nucleotide exchange factor activity					YDR170C	YDR170C||ebi.ac.uk:Database:sgd;A_06_P2158||www.chem.agilent.com:Database:agp		A_06_P2158	1082712	OLIGO	1.693333336	1.505185184	9	9	1	865			237	189	1	.05036587805	1	1	0	0	0	0	0	0	0	0	1	5933.114	4306.178	1	88.13582	22.47584
866					HDA3	16	C	895760	893793	regulation of transcription, DNA-dependent*	histone deacetylase activity					YPR179C	YPR179C||ebi.ac.uk:Database:sgd;A_06_P7227||www.chem.agilent.com:Database:agp		A_06_P7227	1086427	OLIGO	1.905000003	1.505185184	10	9	1	866			259	191	1	.05921768086	1	1	0	0	0	0	0	0	0	0	0	858.9045	592.6329	1	13.56488	22.05839
867					MRPS17	13	C	637003	636290	protein biosynthesis*	structural constituent of ribosome					YMR188C	YMR188C||ebi.ac.uk:Database:sgd;A_06_P5625||www.chem.agilent.com:Database:agp		A_06_P5625	1086319	OLIGO	2.11666667	1.505185184	11	9	1	867			280	190	1	.05307161304	1	1	0	0	0	0	0	0	0	0	0	1294.31	1052.351	1	22.43847	22.38828
868					ERS1	3	C	248811	248029	L-cystine transport	L-cystine transporter activity					YCR075C	YCR075C||ebi.ac.uk:Database:sgd;A_06_P1696||www.chem.agilent.com:Database:agp		A_06_P1696	1085422	OLIGO	2.328333337	1.505185184	12	9	1	868			300	190	1	.0527298025	1	1	0	0	0	0	0	0	0	0	1	1278.995	1108.83	1	23.20293	22.46099
869					GAS2	12	W	816094	817761	biological process unknown	1,3-beta-glucanosyltransferase activity					YLR343W	YLR343W||ebi.ac.uk:Database:sgd;A_06_P5160||www.chem.agilent.com:Database:agp		A_06_P5160	1084243	OLIGO	2.540000004	1.505185184	13	9	1	869			322	189	1	.09110718538	1	1	0	0	0	0	0	0	0	0	1	264.1241	316.796	1	9.800373	22.40075
870						4	C	425869	425567							YDL016C	YDL016C||ebi.ac.uk:Database:sgd;A_06_P1744||www.chem.agilent.com:Database:agp		A_06_P1744	1083514	OLIGO	2.751666671	1.505185184	14	9	1	870			343	190	1	.6577633637	1	1	0	0	0	0	0	0	0	0	1	38.76974	29.25319	1	6.422214	22.28413
871					RPL15B	13	C	510347	509733	protein biosynthesis	structural constituent of ribosome*					YMR121C	YMR121C||ebi.ac.uk:Database:sgd;A_06_P5551||www.chem.agilent.com:Database:agp		A_06_P5551	1084662	OLIGO	2.963333338	1.505185184	15	9	1	871			364	190	1	.0498302743	1	1	0	0	0	0	0	0	0	0	1	2687.664	2901.073	1	40.78998	22.20074
872						15	W	882761	882838	regulation of protein biosynthesis	translation regulator activity					YOR302W	YOR302W||ebi.ac.uk:Database:sgd;A_06_P6664||www.chem.agilent.com:Database:agp		A_06_P6664	1084486	OLIGO	3.175000005	1.505185184	16	9	1	872			385	190	1	.06503700811	1	1	0	0	0	0	0	0	0	0	1	486.8331	560.9157	1	11.33712	21.82182
873					FKS3	13	W	881158	886515	biological process unknown	1,3-beta-glucan synthase activity					YMR306W	YMR306W||ebi.ac.uk:Database:sgd;A_06_P5749||www.chem.agilent.com:Database:agp		A_06_P5749	1086288	OLIGO	3.386666672	1.505185184	17	9	1	873			406	190	1	.4476599367	1	1	0	0	0	0	0	0	0	0	1	39.62779	61.64642	1	5.423382	21.92029
874						15	C	796793	795801	biological process unknown	oxidoreductase activity					YOR246C	YOR246C||ebi.ac.uk:Database:sgd;A_06_P6607||www.chem.agilent.com:Database:agp		A_06_P6607	1084961	OLIGO	3.598333339	1.505185184	18	9	1	874			428	191	1	.04965597079	1	1	0	0	0	0	0	1	0	0	1	4483.422	3852.916	1	56.54219	21.88806
875					THR1	8	W	159430	160503	methionine metabolism*	homoserine kinase activity					YHR025W	YHR025W||ebi.ac.uk:Database:sgd;A_06_P3596||www.chem.agilent.com:Database:agp		A_06_P3596	1086194	OLIGO	3.810000006	1.505185184	19	9	1	875			450	189	1	.05057556307	1	1	0	0	0	0	0	0	0	0	1	3364.443	4702.523	1	43.32136	22.10985
876					SIN4	14	W	206929	209853	transcription from RNA polymerase II promoter	RNA polymerase II transcription mediator activity					YNL236W	YNL236W||ebi.ac.uk:Database:sgd;A_06_P6008||www.chem.agilent.com:Database:agp		A_06_P6008	1081951	OLIGO	4.021666673	1.505185184	20	9	1	876			470	191	1	.05062308756	1	1	0	0	0	0	0	0	0	0	1	1798.932	2019.127	1	32.61233	22.18587
877					YNG2	8	C	284626	283778	chromatin modification	enzyme activator activity					YHR090C	YHR090C||ebi.ac.uk:Database:sgd;A_06_P3665||www.chem.agilent.com:Database:agp		A_06_P3665	1081690	OLIGO	4.23333334	1.505185184	21	9	1	877			491	190	1	.06094850083	1	1	0	0	0	0	0	0	0	0	1	665.2318	575.9307	1	15.51537	22.27798
878					ASH1	11	W	94504	96270	pseudohyphal growth*	specific transcriptional repressor activity					YKL185W	YKL185W||ebi.ac.uk:Database:sgd;A_06_P4598||www.chem.agilent.com:Database:agp		A_06_P4598	1086460	OLIGO	4.445000007	1.505185184	22	9	1	878			512	191	1	.04979188496	1	1	0	0	0	0	0	0	0	0	1	4351.926	5364.584	1	47.43872	22.22383
879					SUE1	16	C	831671	831051	protein catabolism	molecular function unknown					YPR151C	YPR151C||ebi.ac.uk:Database:sgd;A_06_P7199||www.chem.agilent.com:Database:agp		A_06_P7199	1081013	OLIGO	4.656666674	1.505185184	23	9	1	879			533	189	1	.09659848978	1	1	0	0	0	0	0	0	0	0	1	304.1758	234.4094	1	11.22673	22.41791
880					SMC6	12	W	885288	888632	DNA repair*	molecular function unknown					YLR383W	YLR383W||ebi.ac.uk:Database:sgd;A_06_P5201||www.chem.agilent.com:Database:agp		A_06_P5201	1084721	OLIGO	4.868333341	1.505185184	24	9	1	880			555	191	1	.0585957661	1	1	0	0	0	0	0	0	0	0	0	883.9033	617.6996	1	18.22684	22.38372
881						3	C	209605	208130	biological process unknown	serine-type peptidase activity					YCR045C	YCR045C||ebi.ac.uk:Database:sgd;A_06_P1671||www.chem.agilent.com:Database:agp		A_06_P1671	1082233	OLIGO	5.080000008	1.505185184	25	9	1	881			576	189	1	.6965502114	1	1	0	0	0	0	0	0	0	0	1	37.11039	27.19723	1	5.538403	22.65468
882					RNA1	13	C	742734	741511	rRNA-nucleus export*	Ran GTPase activator activity					YMR235C	YMR235C||ebi.ac.uk:Database:sgd;A_06_P5674||www.chem.agilent.com:Database:agp		A_06_P5674	1080738	OLIGO	5.291666675	1.505185184	26	9	1	882			597	191	1	.0499386212	1	1	0	0	0	0	0	0	0	0	1	5327.884	4192.945	1	77.47087	22.36502
883					INO2	4	C	699463	698549	positive regulation of transcription from RNA polymerase II promoter*	specific RNA polymerase II transcription factor activity					YDR123C	YDR123C||ebi.ac.uk:Database:sgd;A_06_P2111||www.chem.agilent.com:Database:agp		A_06_P2111	1081894	OLIGO	5.503333342	1.505185184	27	9	1	883			618	190	1	.139448608	1	1	0	0	0	0	0	0	0	0	1	209.3834	137.1254	1	8.645608	22.32463
884						15	C	198724	197219	biological process unknown	molecular function unknown					YOL070C	YOL070C||ebi.ac.uk:Database:sgd;A_06_P6262||www.chem.agilent.com:Database:agp		A_06_P6262	1082054	OLIGO	5.715000009	1.505185184	28	9	1	884			640	191	1	.0542663649	1	1	0	0	0	0	0	0	0	0	0	1435.813	946.9476	1	23.08728	21.92419
885					ARG3	10	W	268715	269731	arginine biosynthesis*	ornithine carbamoyltransferase activity					YJL088W	YJL088W||ebi.ac.uk:Database:sgd;A_06_P4110||www.chem.agilent.com:Database:agp		A_06_P4110	1084880	OLIGO	5.926666676	1.505185184	29	9	1	885			660	190	1	.05036275479	1	1	0	0	0	0	0	0	0	0	1	2433.359	2077.083	1	34.20879	22.48352
886					BRE5	14	C	718327	716780	protein deubiquitination	molecular function unknown					YNR051C	YNR051C||ebi.ac.uk:Database:sgd;A_06_P6164||www.chem.agilent.com:Database:agp		A_06_P6164	1085837	OLIGO	6.138333343	1.505185184	30	9	1	886			682	191	1	.0512004863	1	1	0	0	0	0	0	0	0	0	1	1530.686	1549.015	1	19.63373	22.73134
887					COS2	2	C	811473	810334	biological process unknown	molecular function unknown					YBR302C	YBR302C||ebi.ac.uk:Database:sgd;A_06_P1556||www.chem.agilent.com:Database:agp		A_06_P1556	1085055	OLIGO	6.35000001	1.505185184	31	9	1	887			703	190	1	.04953381723	1	1	0	0	0	0	0	0	0	0	1	12309.24	14899.42	1	122.049	22.32841
888					HXT3	4	C	1164652	1162949	hexose transport	glucose transporter activity*					YDR345C	YDR345C||ebi.ac.uk:Database:sgd;A_06_P2336||www.chem.agilent.com:Database:agp		A_06_P2336	1086770	OLIGO	6.561666677	1.505185184	32	9	1	888			724	191	1	.04923938521	1	1	0	0	0	0	0	0	0	0	1	12673.77	13815.45	1	121.7977	22.26538
889					GOT1	13	W	854794	855292	ER to Golgi transport*	molecular function unknown					YMR292W	YMR292W||ebi.ac.uk:Database:sgd;A_06_P5732||www.chem.agilent.com:Database:agp		A_06_P5732	1081452	OLIGO	6.773333344	1.505185184	33	9	1	889			745	190	1	.05348313905	1	1	0	0	0	0	0	0	0	0	0	1992.505	3683.954	1	33.62915	22.66058
890					ATG7	8	W	445712	447604	protein-vacuolar targeting*	ubiquitin-like conjugating enzyme activity					YHR171W	YHR171W||ebi.ac.uk:Database:sgd;A_06_P3749||www.chem.agilent.com:Database:agp		A_06_P3749	1081455	OLIGO	6.985000011	1.505185184	34	9	1	890			766	190	1	.08251262874	1	1	0	0	0	0	0	0	0	0	0	426.1806	270.5862	1	11.33359	22.61871
891					RPL35A	4	W	117665	118518	protein biosynthesis	structural constituent of ribosome					YDL191W	YDL191W||ebi.ac.uk:Database:sgd;A_06_P1926||www.chem.agilent.com:Database:agp		A_06_P1926	1082799	OLIGO	7.196666678	1.505185184	35	9	1	891			787	190	1	.04947013381	1	1	0	0	0	0	0	0	0	0	1	13044.8	15532.09	1	175.9646	22.69259
892					ARP4	10	C	285187	283718	regulation of transcription from RNA polymerase II promoter*	chromatin binding*					YJL081C	YJL081C||ebi.ac.uk:Database:sgd;A_06_P4103||www.chem.agilent.com:Database:agp		A_06_P4103	1081277	OLIGO	7.408333345	1.505185184	36	9	1	892			809	191	1	.05364563364	1	1	0	0	0	0	0	0	0	0	0	1258.084	974.9775	1	20.95736	22.45149
893					MRPL13	11	C	450860	450066	protein biosynthesis	structural constituent of ribosome					YKR006C	YKR006C||ebi.ac.uk:Database:sgd;A_06_P4643||www.chem.agilent.com:Database:agp		A_06_P4643	1085294	OLIGO	7.620000012	1.505185184	37	9	1	893			830	189	1	.0515715111	1	1	0	0	0	0	0	0	0	0	0	1434.785	1828.1	1	29.01233	22.64925
894					SQT1	9	W	378483	379778	ribosomal large subunit assembly and maintenance	molecular function unknown					YIR012W	YIR012W||ebi.ac.uk:Database:sgd;A_06_P3988||www.chem.agilent.com:Database:agp		A_06_P3988	1081456	OLIGO	7.831666679	1.505185184	38	9	1	894			851	190	1	.04973534805	1	1	0	0	0	0	0	0	0	0	1	3272.979	3762.72	1	53.77195	22.59925
895					RRP42	4	C	264110	263313	35S primary transcript processing*	3'-5'-exoribonuclease activity					YDL111C	YDL111C||ebi.ac.uk:Database:sgd;A_06_P1841||www.chem.agilent.com:Database:agp		A_06_P1841	1080808	OLIGO	8.043333346	1.505185184	39	9	1	895			873	190	1	.05335387014	1	1	0	0	0	0	0	0	0	0	1	1023.925	1137.394	1	17.71733	22.43706
896					YOS9	4	W	565924	567552	ER to Golgi transport	protein transporter activity					YDR057W	YDR057W||ebi.ac.uk:Database:sgd;A_06_P2044||www.chem.agilent.com:Database:agp		A_06_P2044	1081654	OLIGO	8.255000013	1.505185184	40	9	1	896			894	191	1	.06058830585	1	1	0	0	0	0	0	0	0	0	1	642.8142	609.1764	1	14.63594	22.67279
897					RSF1	13	W	330792	331922	aerobic respiration*	molecular function unknown					YMR030W	YMR030W||ebi.ac.uk:Database:sgd;A_06_P5458||www.chem.agilent.com:Database:agp		A_06_P5458	1084368	OLIGO	8.46666668	1.505185184	41	9	1	897			914	190	1	.09241908605	1	1	0	0	0	0	0	0	0	0	0	344.0674	235.7386	1	11.72183	22.64599
898					RHO3	9	W	139749	140444	actin filament organization*	GTPase activity*					YIL118W	YIL118W||ebi.ac.uk:Database:sgd;A_06_P3917||www.chem.agilent.com:Database:agp		A_06_P3917	1086391	OLIGO	8.678333347	1.505185184	42	9	1	898			935	191	1	.05268004644	1	1	0	0	0	0	0	0	0	0	0	1639.099	1179.259	1	21.66224	22.31111
899					AVO2	13	W	406303	407583	regulation of cell growth	molecular function unknown					YMR068W	YMR068W||ebi.ac.uk:Database:sgd;A_06_P5495||www.chem.agilent.com:Database:agp		A_06_P5495	1084972	OLIGO	8.890000014	1.505185184	43	9	1	899			957	190	1	.1042750851	1	1	0	0	0	0	0	0	0	0	1	215.2463	270.2189	1	9.346838	22.3587
900					RRP12	16	W	529720	533406	processing of 20S pre-rRNA*	molecular function unknown					YPL012W	YPL012W||ebi.ac.uk:Database:sgd;A_06_P6771||www.chem.agilent.com:Database:agp		A_06_P6771	1085506	OLIGO	9.101666681	1.505185184	44	9	1	900			978	191	1	.04986996164	1	1	0	0	0	0	0	0	0	0	1	2669.649	2959.354	1	27.27685	22.68093
901					SEC59	13	C	296737	295178	protein amino acid glycosylation*	dolichol kinase activity					YMR013C	YMR013C||ebi.ac.uk:Database:sgd;A_06_P5440||www.chem.agilent.com:Database:agp		A_06_P5440	1084981	OLIGO	9.313333348	1.505185184	45	9	1	901			999	190	1	.05269401832	1	1	0	0	0	0	0	0	0	0	1	1113.868	1302.595	1	17.95398	22.55769
902					HPR1	4	W	730573	732831	mRNA-nucleus export*	nucleic acid binding					YDR138W	YDR138W||ebi.ac.uk:Database:sgd;A_06_P2126||www.chem.agilent.com:Database:agp		A_06_P2126	1081105	OLIGO	9.525000015	1.505185184	46	9	1	902			1020	190	1	.06205727995	1	1	0	0	0	0	0	0	0	0	0	668.178	529.3221	1	14.02698	22.4529
903					SET5	8	C	516484	514904	biological process unknown	molecular function unknown					YHR207C	YHR207C||ebi.ac.uk:Database:sgd;A_06_P3785||www.chem.agilent.com:Database:agp		A_06_P3785	1082755	OLIGO	9.736666682	1.505185184	47	9	1	903			1041	190	1	.05216422496	1	1	0	0	0	0	0	0	0	0	0	1614.199	1251.676	1	23.13047	22.15613
904					SWD2	11	W	403745	404734	histone methylation*	histone lysine N-methyltransferase activity (H3-K4 specific)					YKL018W	YKL018W||ebi.ac.uk:Database:sgd;A_06_P4426||www.chem.agilent.com:Database:agp		A_06_P4426	1080834	OLIGO	9.948333349	1.505185184	48	9	1	904			1063	191	1	.06315436981	1	1	0	0	0	0	0	0	0	0	1	551.5096	565.8449	1	13.46292	22.57664
905						7	C	112009	111704							YGL204C	YGL204C||ebi.ac.uk:Database:sgd;A_06_P3159||www.chem.agilent.com:Database:agp		A_06_P3159	1085915	OLIGO	10.160000016	1.505185184	49	9	1	905			1084	190	1	.1965000839	1	1	0	0	0	0	0	0	0	0	1	123.5754	109.6994	1	7.674636	22.56923
906						4	C	583462	582788	biological process unknown	molecular function unknown					YDR067C	YDR067C||ebi.ac.uk:Database:sgd;A_06_P2054||www.chem.agilent.com:Database:agp		A_06_P2054	1081206	OLIGO	10.371666683	1.505185184	50	9	1	906			1105	191	1	.1153715637	1	1	0	0	0	0	0	0	0	0	1	216.2882	208.3793	1	9.393902	22.46324
907						14	W	424155	424583							YNL105W	YNL105W||ebi.ac.uk:Database:sgd;A_06_P5876||www.chem.agilent.com:Database:agp		A_06_P5876	1082949	OLIGO	10.58333335	1.505185184	51	9	1	907			1126	189	1	.6710532836	1	1	0	0	0	0	0	0	0	0	0	32.38917	33.8467	1	4.43346	22.79197
908					TFP1	4	W	126788	130003	vacuolar acidification*	hydrogen-transporting ATPase activity, rotational mechanism*					YDL185W	YDL185W||ebi.ac.uk:Database:sgd;A_06_P1920||www.chem.agilent.com:Database:agp		A_06_P1920	1083194	OLIGO	10.795000017	1.505185184	52	9	1	908			1147	191	1	.04952025466	1	1	0	0	0	0	0	0	0	0	1	50132.22	41300.67	1	689.8052	22.65019
909						16	C	218362	216011	biological process unknown	receptor activity					YPL176C	YPL176C||ebi.ac.uk:Database:sgd;A_06_P6935||www.chem.agilent.com:Database:agp		A_06_P6935	1086727	OLIGO	11.006666684	1.505185184	53	9	1	909			1168	190	1	.05120893827	1	1	0	0	0	0	0	0	0	0	1	1670.999	1497.584	1	27.45459	22.6332
910					GAT2	13	W	541198	542880	transcription	transcription factor activity					YMR136W	YMR136W||ebi.ac.uk:Database:sgd;A_06_P5568||www.chem.agilent.com:Database:agp		A_06_P5568	1084881	OLIGO	11.218333351	1.505185184	54	9	1	910			1190	191	1	.05203596875	1	1	0	0	0	0	0	0	0	0	1	1375.005	1253.026	1	21.59896	22.15672
911						14	C	51687	49396	ubiquitin-dependent protein catabolism	protein binding					YNL311C	YNL311C||ebi.ac.uk:Database:sgd;A_06_P6083||www.chem.agilent.com:Database:agp		A_06_P6083	1086174	OLIGO	11.430000018	1.505185184	55	9	1	911			1211	190	1	.05439405608	1	1	0	0	0	0	0	0	0	0	0	1310.967	907.4693	1	19.48819	22.33942
912						16	C	283002	282685							YPL142C	YPL142C||ebi.ac.uk:Database:sgd;A_06_P6901||www.chem.agilent.com:Database:agp		A_06_P6901	1082032	OLIGO	11.641666685	1.505185184	56	9	1	912			1232	191	1	.0592006328	1	1	0	0	0	0	0	0	0	0	0	886.4287	2224.13	1	16.18392	22.87132
913					MRPL33	13	W	841941	842201	protein biosynthesis	structural constituent of ribosome					YMR286W	YMR286W||ebi.ac.uk:Database:sgd;A_06_P5725||www.chem.agilent.com:Database:agp		A_06_P5725	1081859	OLIGO	11.853333352	1.505185184	57	9	1	913			1253	189	1	.1027048453	1	1	0	0	0	0	0	0	0	0	1	207.5788	292.2686	1	8.491568	22.27925
914					MRP1	4	W	1169170	1170135	protein biosynthesis	structural constituent of ribosome					YDR347W	YDR347W||ebi.ac.uk:Database:sgd;A_06_P2338||www.chem.agilent.com:Database:agp		A_06_P2338	1080873	OLIGO	12.065000019	1.505185184	58	9	1	914			1274	190	1	.05118626909	1	1	0	0	0	0	0	0	0	0	0	1572.116	1946.582	1	22.74283	22.24
915					OGG1	13	W	151871	153001	DNA repair*	purine-specific oxidized base lesion DNA N-glycosylase activity					YML060W	YML060W||ebi.ac.uk:Database:sgd;A_06_P5349||www.chem.agilent.com:Database:agp		A_06_P5349	1081539	OLIGO	12.276666686	1.505185184	59	9	1	915			1296	190	1	.08032772187	1	1	0	0	0	0	0	0	0	0	1	346.353	351.1222	1	10.18693	22.78626
916					CDC27	2	C	69442	67166	mitotic sister chromatid segregation*	protein binding*					YBL084C	YBL084C||ebi.ac.uk:Database:sgd;A_06_P1216||www.chem.agilent.com:Database:agp		A_06_P1216	1081994	OLIGO	12.488333353	1.505185184	60	9	1	916			1317	191	1	.06543870971	1	1	0	0	0	0	0	0	0	0	1	529.0209	497.7921	1	10.63033	22.78195
917					EST1	12	C	609526	607427	telomerase-dependent telomere maintenance	RNA binding*					YLR233C	YLR233C||ebi.ac.uk:Database:sgd;A_06_P5047||www.chem.agilent.com:Database:agp		A_06_P5047	1084893	OLIGO	12.70000002	1.505185184	61	9	1	917			1337	190	1	.05175601177	1	1	0	0	0	0	0	0	0	0	1	1445.132	1323.251	1	23.53023	22.67557
918					CSR1	12	W	878282	879508	cell wall organization and biogenesis*	phosphatidylinositol transporter activity					YLR380W	YLR380W||ebi.ac.uk:Database:sgd;A_06_P5198||www.chem.agilent.com:Database:agp		A_06_P5198	1083058	OLIGO	12.911666687	1.505185184	62	9	1	918			1359	190	1	.05122010971	1	1	0	0	0	0	0	0	0	0	0	1815.75	2495.397	1	23.57906	22.61654
919					RAM2	11	W	402211	403161	peptide pheromone maturation*	protein farnesyltransferase activity*					YKL019W	YKL019W||ebi.ac.uk:Database:sgd;A_06_P4427||www.chem.agilent.com:Database:agp		A_06_P4427	1083183	OLIGO	13.123333354	1.505185184	63	9	1	919			1380	190	1	.05021808766	1	1	0	0	0	0	0	0	0	0	1	2185.56	2495.815	1	31.28499	22.92364
920						12	W	604576	604881							YLR230W	YLR230W||ebi.ac.uk:Database:sgd;A_06_P5044||www.chem.agilent.com:Database:agp		A_06_P5044	1081478	OLIGO	13.335000021	1.505185184	64	9	1	920			1401	191	1	.242646433	1	1	0	0	0	0	0	0	0	0	1	86.95493	99.89816	1	7.648531	22.65918
921					TRK1	10	C	177224	173517	potassium ion homeostasis	potassium ion transporter activity					YJL129C	YJL129C||ebi.ac.uk:Database:sgd;A_06_P4150||www.chem.agilent.com:Database:agp		A_06_P4150	1083463	OLIGO	13.546666688	1.505185184	65	9	1	921			1422	190	1	.05280034852	1	1	0	0	0	0	0	0	0	0	1	1110.957	1202.914	1	15.15595	22.50542
922					MAK21	4	W	570645	573722	ribosomal large subunit assembly and maintenance	molecular function unknown					YDR060W	YDR060W||ebi.ac.uk:Database:sgd;A_06_P2047||www.chem.agilent.com:Database:agp		A_06_P2047	1084522	OLIGO	13.758333355	1.505185184	66	9	1	922			1444	191	1	.05083798616	1	1	0	0	0	0	0	0	0	0	1	2064.563	1724.108	1	34.38005	22.84615
923					NFT1	11	W	652718	656374	transport	ATPase activity, coupled to transmembrane movement of substances					YKR103W	YKR103W||ebi.ac.uk:Database:sgd;A_06_P4741||www.chem.agilent.com:Database:agp		A_06_P4741	1082839	OLIGO	13.970000022	1.505185184	67	9	1	923			1465	190	1	.7188532652	1	1	0	0	0	0	0	0	0	0	0	35.3593	26.83657	1	7.193392	22.45185
924					KAR9	16	W	33013	34947	nuclear migration, microtubule-mediated	molecular function unknown					YPL269W	YPL269W||ebi.ac.uk:Database:sgd;A_06_P7030||www.chem.agilent.com:Database:agp		A_06_P7030	1081351	OLIGO	14.181666689	1.505185184	68	9	1	924			1486	191	1	.1317772591	1	1	0	0	0	0	0	0	0	0	1	179.3375	183.155	1	9.999491	22.3097
925					BUB2	13	C	387020	386100	mitotic spindle checkpoint	GTPase activator activity					YMR055C	YMR055C||ebi.ac.uk:Database:sgd;A_06_P5482||www.chem.agilent.com:Database:agp		A_06_P5482	1084342	OLIGO	14.393333356	1.505185184	69	9	1	925			1507	190	1	.07466905841	1	1	0	0	0	0	0	0	0	0	1	373.0782	417.6472	1	10.20726	22.78623
926					MUM3	15	W	875596	877035	spore wall assembly (sensu Fungi)*	acyltransferase activity					YOR298W	YOR298W||ebi.ac.uk:Database:sgd;A_06_P6660||www.chem.agilent.com:Database:agp		A_06_P6660	1082679	OLIGO	14.605000023	1.505185184	70	9	1	926			1528	191	1	.42809902	1	1	0	0	0	0	0	0	0	0	1	56.6988	47.78286	1	6.733123	22.7
927					THR4	3	W	216692	218236	endocytosis*	threonine synthase activity					YCR053W	YCR053W||ebi.ac.uk:Database:sgd;A_06_P1679||www.chem.agilent.com:Database:agp		A_06_P1679	1081180	OLIGO	14.81666669	1.505185184	71	9	1	927			1549	190	1	.04917896913	1	1	0	0	0	0	0	0	0	0	1	14278.3	13682.45	1	192.234	22.50388
928					APP1	14	W	447611	449374	actin filament organization*	molecular function unknown					YNL094W	YNL094W||ebi.ac.uk:Database:sgd;A_06_P5865||www.chem.agilent.com:Database:agp		A_06_P5865	1084495	OLIGO	15.028333357	1.505185184	72	9	1	928			1571	191	1	.06440580973	1	1	0	0	0	0	0	0	0	0	1	487.9336	591.3806	1	10.8637	22.38951
929					STE11	12	W	849865	852018	protein amino acid phosphorylation*	MAP kinase kinase kinase activity					YLR362W	YLR362W||ebi.ac.uk:Database:sgd;A_06_P5179||www.chem.agilent.com:Database:agp		A_06_P5179	1085517	OLIGO	15.240000024	1.505185184	73	9	1	929			1592	190	1	.05948772262	1	1	0	0	0	0	0	0	0	0	1	633.6014	693.885	1	12.80793	22
930					LIN1	8	C	412408	411386	biological process unknown	protein binding					YHR156C	YHR156C||ebi.ac.uk:Database:sgd;A_06_P3734||www.chem.agilent.com:Database:agp		A_06_P3734	1082368	OLIGO	15.451666691	1.505185184	74	9	1	930			1613	191	1	.1511413811	1	1	0	0	0	0	0	0	0	0	1	165.2664	145.3712	1	6.536016	22.4382
931						12	W	493885	494391	biological process unknown	molecular function unknown					YLR164W	YLR164W||ebi.ac.uk:Database:sgd;A_06_P4978||www.chem.agilent.com:Database:agp		A_06_P4978	1083704	OLIGO	15.663333358	1.505185184	75	9	1	931			1634	190	1	.06461613215	1	1	0	0	0	0	0	0	0	0	1	535.5273	520.932	1	11.48485	22.52708
932						8	W	280821	281156	RNA metabolism	molecular function unknown					YHR087W	YHR087W||ebi.ac.uk:Database:sgd;A_06_P3662||www.chem.agilent.com:Database:agp		A_06_P3662	1084697	OLIGO	15.875000025	1.505185184	76	9	1	932			1655	190	1	.08658108287	1	1	0	0	0	0	0	0	0	0	0	210.5486	509.6214	1	7.669043	22.35018
933					IES1	6	C	109924	107846	chromatin remodeling	molecular function unknown					YFL013C	YFL013C||ebi.ac.uk:Database:sgd;A_06_P2837||www.chem.agilent.com:Database:agp		A_06_P2837	1082749	OLIGO	16.086666692	1.505185184	77	9	1	933			1677	190	1	.06424154205	1	1	0	0	0	0	0	0	0	0	0	610.4466	483.1052	1	14.20386	22.53383
934					APC5	15	C	800731	798674	mitotic sister chromatid segregation*	protein binding*					YOR249C	YOR249C||ebi.ac.uk:Database:sgd;A_06_P6610||www.chem.agilent.com:Database:agp		A_06_P6610	1083516	OLIGO	16.298333359	1.505185184	78	9	1	934			1698	191	1	.05887082987	1	1	0	0	0	0	0	0	0	0	1	708.7661	661.6554	1	14.08922	22.73047
935					FAR1	10	C	126245	123753	signal transduction during conjugation with cellular fusion*	cyclin-dependent protein kinase inhibitor activity					YJL157C	YJL157C||ebi.ac.uk:Database:sgd;A_06_P4179||www.chem.agilent.com:Database:agp		A_06_P4179	1081845	OLIGO	16.510000026	1.505185184	79	9	1	935			1719	190	1	.0515873078	1	1	0	0	0	0	0	0	0	0	1	1367.811	1543.696	1	23.1039	22.32714
936						10	W	586314	586664							YJR087W	YJR087W||ebi.ac.uk:Database:sgd;A_06_P4329||www.chem.agilent.com:Database:agp		A_06_P4329	1082891	OLIGO	16.721666693	1.505185184	80	9	1	936			1740	191	1	.1707517252	1	1	0	0	0	0	0	0	0	0	1	119.463	153.2875	1	7.316394	22.70566
937					SRP21	11	C	212644	212141	protein-ER targeting*	signal sequence binding					YKL122C	YKL122C||ebi.ac.uk:Database:sgd;A_06_P4534||www.chem.agilent.com:Database:agp		A_06_P4534	1081746	OLIGO	16.93333336	1.505185184	81	9	1	937			1761	190	1	.07055390858	1	1	0	0	0	0	0	1	0	0	1	438.4977	436.8617	1	9.777132	22.65283
938					DAD4	4	C	1108493	1108275	mitotic spindle organization and biogenesis in nucleus*	protein binding					YDR320C-A	YDR320C-A||ebi.ac.uk:Database:sgd;A_06_P2310||www.chem.agilent.com:Database:agp		A_06_P2310	1084803	OLIGO	17.145000027	1.505185184	82	9	1	938			1782	191	1	.05518300035	1	1	0	0	0	0	0	0	0	0	0	833.4445	1251.589	1	15.78971	22.46886
939					DOP1	4	C	739992	734896	cellular morphogenesis	molecular function unknown					YDR141C	YDR141C||ebi.ac.uk:Database:sgd;A_06_P2129||www.chem.agilent.com:Database:agp		A_06_P2129	1081431	OLIGO	17.356666694	1.505185184	83	9	1	939			1803	190	1	.05025967289	1	1	0	0	0	0	0	0	0	0	1	2076.958	2124.547	1	35.18345	22.35556
940					SNQ2	4	W	465916	470421	response to drug*	xenobiotic-transporting ATPase activity					YDR011W	YDR011W||ebi.ac.uk:Database:sgd;A_06_P1996||www.chem.agilent.com:Database:agp		A_06_P1996	1082236	OLIGO	17.568333361	1.505185184	84	9	1	940			1825	191	1	.05005050696	1	1	0	0	0	0	0	0	0	0	1	2723.91	3293.14	1	39.61373	22.13433
941					GPI11	4	W	1067725	1068384	GPI anchor biosynthesis	phosphoethanolamine N-methyltransferase activity					YDR302W	YDR302W||ebi.ac.uk:Database:sgd;A_06_P2291||www.chem.agilent.com:Database:agp		A_06_P2291	1084065	OLIGO	17.780000028	1.505185184	85	9	1	941			1846	191	1	.0526186842	1	1	0	0	0	0	0	0	0	0	0	1127.794	1359.349	1	20.17465	22.73103
942						15	C	31605	28702	cell wall organization and biogenesis	glucosidase activity					YOL155C	YOL155C||ebi.ac.uk:Database:sgd;A_06_P6348||www.chem.agilent.com:Database:agp		A_06_P6348	1086218	OLIGO	17.991666695	1.505185184	86	9	1	942			1867	191	1	.05043540137	1	1	0	0	0	0	0	0	0	0	1	69264.92	48403.37	1	786.3982	23.10039
943					GYL1	13	W	647117	649279	ER to Golgi transport*	protein binding					YMR192W	YMR192W||ebi.ac.uk:Database:sgd;A_06_P5629||www.chem.agilent.com:Database:agp		A_06_P5629	1085472	OLIGO	18.203333362	1.505185184	87	9	1	943			1888	190	1	.07662415029	1	1	0	0	0	0	0	0	0	0	0	452.3143	321.9037	1	14.48935	22.30451
944					RAD23	5	C	82603	81407	ER-associated protein catabolism*	damaged DNA binding					YEL037C	YEL037C||ebi.ac.uk:Database:sgd;A_06_P2578||www.chem.agilent.com:Database:agp		A_06_P2578	1082325	OLIGO	18.415000029	1.505185184	88	9	1	944			1909	191	1	.05112361522	1	1	0	0	0	0	0	0	0	0	0	2976.884	4449.844	1	46.49577	22.62182
945					AVT3	11	W	171788	173866	neutral amino acid transport	neutral amino acid transporter activity					YKL146W	YKL146W||ebi.ac.uk:Database:sgd;A_06_P4558||www.chem.agilent.com:Database:agp		A_06_P4558	1081251	OLIGO	18.626666696	1.505185184	89	9	1	945			1930	190	1	.05260065492	1	1	0	0	0	0	0	0	0	0	1	1130.267	1335.038	1	19.96638	22.68148
946						13	C	777922	777614							YMR254C	YMR254C||ebi.ac.uk:Database:sgd;A_06_P5693||www.chem.agilent.com:Database:agp		A_06_P5693	1083316	OLIGO	18.838333363	1.505185184	90	9	1	946			1951	190	1	.6462244642	1	1	0	0	0	0	0	0	0	0	0	38.69275	30.42685	1	5.780491	22.55036
947						12	W	183622	184161	biological process unknown	molecular function unknown					YLR021W	YLR021W||ebi.ac.uk:Database:sgd;A_06_P4833||www.chem.agilent.com:Database:agp		A_06_P4833	1085237	OLIGO	19.05000003	1.505185184	91	9	1	947			1973	190	1	.0570011436	1	1	0	0	0	0	0	0	0	0	1	720.9677	836.6959	1	14.57266	22.75
948					TRS23	4	W	954282	954941	ER to Golgi transport	molecular function unknown					YDR246W	YDR246W||ebi.ac.uk:Database:sgd;A_06_P2235||www.chem.agilent.com:Database:agp		A_06_P2235	1083625	OLIGO	19.261666697	1.505185184	92	9	1	948			1994	191	1	.06451326329	1	1	0	0	0	0	0	0	0	0	1	544.1453	517.0499	1	12.72175	22.62909
949					KOG1	8	C	480671	475998	biological process unknown	molecular function unknown					YHR186C	YHR186C||ebi.ac.uk:Database:sgd;A_06_P3764||www.chem.agilent.com:Database:agp		A_06_P3764	1084784	OLIGO	19.473333364	1.505185184	93	9	1	949			2015	190	1	.05627271707	1	1	0	0	0	0	0	0	0	0	1	799.9765	816.3328	1	17.33658	22.06107
950					ADA2	4	W	1356055	1357359	histone acetylation*	transcription coactivator activity					YDR448W	YDR448W||ebi.ac.uk:Database:sgd;A_06_P2441||www.chem.agilent.com:Database:agp		A_06_P2441	1084013	OLIGO	19.685000031	1.505185184	94	9	1	950			2036	191	1	.05466970879	1	1	0	0	0	0	0	0	0	0	1	925.0966	923.9575	1	18.244	22.65169
951						6	C	226453	226109	biological process unknown	molecular function unknown					YFR035C	YFR035C||ebi.ac.uk:Database:sgd;A_06_P2933||www.chem.agilent.com:Database:agp		A_06_P2933	1083781	OLIGO	19.896666698	1.505185184	95	9	1	951			2057	190	1	.1985136136	1	1	0	0	0	0	0	0	0	0	1	95.52575	137.924	1	7.28103	22.63139
952					RPL12A	5	C	53218	52721	protein biosynthesis*	structural constituent of ribosome					YEL054C	YEL054C||ebi.ac.uk:Database:sgd;A_06_P2595||www.chem.agilent.com:Database:agp		A_06_P2595	1084719	OLIGO	20.108333365	1.505185184	96	9	1	952			2079	191	1	.0493556892	1	1	0	0	0	0	0	0	0	0	1	34524.14	39944.67	1	328.0677	22.79562
953						14	W	635943	636383	biological process unknown	molecular function unknown					YNR004W	YNR004W||ebi.ac.uk:Database:sgd;A_06_P6115||www.chem.agilent.com:Database:agp		A_06_P6115	1085869	OLIGO	20.320000032	1.505185184	97	9	1	953			2100	190	1	.2580497085	1	1	0	0	0	0	0	0	0	0	1	79.57164	95.94201	1	7.403049	22.15658
954					ILV2	13	W	484083	486146	branched chain family amino acid biosynthesis	acetolactate synthase activity*					YMR108W	YMR108W||ebi.ac.uk:Database:sgd;A_06_P5537||www.chem.agilent.com:Database:agp		A_06_P5537	1082187	OLIGO	20.531666699	1.505185184	98	9	1	954			2121	191	1	.04955347313	1	1	0	0	0	0	0	0	0	0	1	11640.22	14149.36	1	158.2091	22.38095
955					CMP2	13	W	160180	161994	cell ion homeostasis*	calcium-dependent protein serine/threonine phosphatase activity					YML057W	YML057W||ebi.ac.uk:Database:sgd;A_06_P5344||www.chem.agilent.com:Database:agp		A_06_P5344	1083928	OLIGO	20.743333366	1.505185184	99	9	1	955			2143	190	1	.05714727678	1	1	0	0	0	0	0	0	0	0	0	689.0063	928.4742	1	14.21524	22.9262
956					VMA6	12	C	1027889	1026852	vacuolar acidification*	hydrogen-transporting ATPase activity, rotational mechanism					YLR447C	YLR447C||ebi.ac.uk:Database:sgd;A_06_P5266||www.chem.agilent.com:Database:agp		A_06_P5266	1082337	OLIGO	20.955000033	1.505185184	100	9	1	956			2163	191	1	.04969055638	1	1	0	0	0	0	0	0	0	0	1	12556.32	10024.53	1	202.785	23.09962
957					HSP32	16	W	11887	12600	biological process unknown	unfolded protein binding*					YPL280W	YPL280W||ebi.ac.uk:Database:sgd;A_06_P7041||www.chem.agilent.com:Database:agp		A_06_P7041	1085743	OLIGO	21.1666667	1.505185184	101	9	1	957			2184	190	1	.06756483473	1	1	0	0	0	0	0	0	0	0	0	401.9508	609.3626	1	11.36917	23.0625
958					MCH2	11	W	6108	7529	transport	transporter activity*					YKL221W	YKL221W||ebi.ac.uk:Database:sgd;A_06_P4633||www.chem.agilent.com:Database:agp		A_06_P4633	1083254	OLIGO	21.378333367	1.505185184	102	9	1	958			2205	191	1	.3452534086	1	1	0	0	0	0	0	0	0	0	0	41.17538	96.74799	1	6.307679	23.05166
959					PCI8	9	C	229991	228657	protein deneddylation	molecular function unknown					YIL071C	YIL071C||ebi.ac.uk:Database:sgd;A_06_P3871||www.chem.agilent.com:Database:agp		A_06_P3871	1085370	OLIGO	21.590000034	1.505185184	103	9	1	959			2227	189	1	.09458166164	1	1	0	0	0	0	0	0	0	0	0	374.4128	206.3038	1	10.50631	22.92565
960					UTP20	2	W	227639	235120	35S primary transcript processing	snoRNA binding					YBL004W	YBL004W||ebi.ac.uk:Database:sgd;A_06_P1133||www.chem.agilent.com:Database:agp		A_06_P1133	1080807	OLIGO	21.801666701	1.505185184	104	9	1	960			2248	191	1	.05095578131	1	1	0	0	0	0	0	0	0	0	1	1611.034	1698.018	1	27.07086	22.79422
961					SUL1	2	W	789230	791809	sulfate transport	sulfate transporter activity					YBR294W	YBR294W||ebi.ac.uk:Database:sgd;A_06_P1548||www.chem.agilent.com:Database:agp		A_06_P1548	1084134	OLIGO	22.013333368	1.505185184	105	9	1	961			2269	190	1	.05774023401	1	1	0	0	0	0	0	0	0	0	0	10815.73	4196.061	1	160.0912	22.6203
962					SDC1	4	W	1399005	1399532	chromatin silencing at telomere*	histone lysine N-methyltransferase activity (H3-K4 specific)					YDR469W	YDR469W||ebi.ac.uk:Database:sgd;A_06_P2462||www.chem.agilent.com:Database:agp		A_06_P2462	1086877	OLIGO	22.225000035	1.505185184	106	9	1	962			2290	191	1	.1942923067	1	1	0	0	0	0	0	0	0	0	1	137.4581	100.569	1	8.074259	22.58394
963						11	C	5621	3504	biological process unknown	molecular function unknown					YKL222C	YKL222C||ebi.ac.uk:Database:sgd;A_06_P4634||www.chem.agilent.com:Database:agp		A_06_P4634	1082341	OLIGO	22.436666702	1.505185184	107	9	1	963			2312	190	1	.06451927234	1	1	0	0	0	0	0	0	0	0	1	551.8878	510.4467	1	13.47623	21.45594
964					MTD1	11	W	590037	590999	one-carbon compound metabolism*	methylenetetrahydrofolate dehydrogenase (NAD+) activity					YKR080W	YKR080W||ebi.ac.uk:Database:sgd;A_06_P4718||www.chem.agilent.com:Database:agp		A_06_P4718	1083764	OLIGO	0	1.693333332	1	10	1	964			67	209	1	.0499409214	1	1	0	0	0	0	0	1	0	0	1	3014.762	2635.789	1	40.53364	21.61765
965						15	C	15504	15232	biological process unknown	molecular function unknown					YOL159C-A	YOL159C-A||ebi.ac.uk:Database:sgd;A_06_P6353||www.chem.agilent.com:Database:agp		A_06_P6353	1085020	OLIGO	.211666667	1.693333332	2	10	1	965			88	209	1	.3682142256	1	1	0	0	0	0	0	0	0	0	1	50.37868	72.47246	1	5.749585	22.09091
966					NHP6B	2	C	426483	426184	regulation of transcription from RNA polymerase II promoter*	chromatin binding					YBR089C-A	YBR089C-A||ebi.ac.uk:Database:sgd;A_06_P1339||www.chem.agilent.com:Database:agp		A_06_P1339	1081410	OLIGO	.423333334	1.693333332	3	10	1	966			110	208	1	.05099295711	1	1	0	0	0	0	0	0	0	0	0	3438.382	5112.083	1	50.01988	22.13603
967					AKL1	2	C	360185	356859	actin cytoskeleton organization and biogenesis*	protein kinase activity					YBR059C	YBR059C||ebi.ac.uk:Database:sgd;A_06_P1307||www.chem.agilent.com:Database:agp		A_06_P1307	1085921	OLIGO	.635000001	1.693333332	4	10	1	967			131	210	1	.05095798097	1	1	0	0	0	0	0	0	0	0	1	1608.348	1704.308	1	24.16394	22.17407
968					ATM1	13	C	869626	867554	iron ion homeostasis	ATPase activity, coupled to transmembrane movement of substances					YMR301C	YMR301C||ebi.ac.uk:Database:sgd;A_06_P5742||www.chem.agilent.com:Database:agp		A_06_P5742	1081640	OLIGO	.846666668	1.693333332	5	10	1	968			152	208	1	.05296359483	1	1	0	0	0	0	0	0	0	0	0	1070.088	1323.516	1	16.39476	22.00717
969					GIN4	4	C	1465776	1462348	protein amino acid phosphorylation*	protein kinase activity					YDR507C	YDR507C||ebi.ac.uk:Database:sgd;A_06_P2500||www.chem.agilent.com:Database:agp		A_06_P2500	1084260	OLIGO	1.058333335	1.693333332	6	10	1	969			174	210	1	.05348312284	1	1	0	0	0	0	0	0	0	0	0	1640.421	1083	1	22.00434	21.82463
970						12	C	797078	796698							YLR334C	YLR334C||ebi.ac.uk:Database:sgd;A_06_P5151||www.chem.agilent.com:Database:agp		A_06_P5151	1083347	OLIGO	1.270000002	1.693333332	7	10	1	970			195	208	1	.6688734901	1	1	0	0	0	0	0	0	0	0	0	32.67243	33.77579	1	4.690289	22.01818
971						15	C	441164	440391	biological process unknown	molecular function unknown					YOR060C	YOR060C||ebi.ac.uk:Database:sgd;A_06_P6422||www.chem.agilent.com:Database:agp		A_06_P6422	1081341	OLIGO	1.481666669	1.693333332	8	10	1	971			216	209	1	.1492787787	1	1	0	0	0	0	0	1	0	0	1	161.0904	153.4137	1	7.290144	22.18727
972						15	C	440259	438907	biological process unknown	molecular function unknown					YOR059C	YOR059C||ebi.ac.uk:Database:sgd;A_06_P6421||www.chem.agilent.com:Database:agp		A_06_P6421	1085886	OLIGO	1.693333336	1.693333332	9	10	1	972			237	209	1	.05364179085	1	1	0	0	0	0	0	0	0	0	0	1547.26	1037.129	1	28.55368	22.33088
973						7	C	154312	153173	metabolism	oxidoreductase activity, acting on the CH-OH group of donors, NAD or NADP as acceptor					YGL185C	YGL185C||ebi.ac.uk:Database:sgd;A_06_P3140||www.chem.agilent.com:Database:agp		A_06_P3140	1085693	OLIGO	1.905000003	1.693333332	10	10	1	973			258	210	1	.08625879135	1	1	0	0	0	0	0	0	0	0	1	319.1015	306.2443	1	9.9828	22.44776
974					DSK2	13	W	818826	819947	ER-associated protein catabolism*	protein binding, bridging					YMR276W	YMR276W||ebi.ac.uk:Database:sgd;A_06_P5715||www.chem.agilent.com:Database:agp		A_06_P5715	1083648	OLIGO	2.11666667	1.693333332	11	10	1	974			280	209	1	.05132829062	1	1	0	0	0	0	0	0	0	0	0	3013.918	4629.791	1	44.8026	22.33456
975					ERG25	7	W	610568	611497	ergosterol biosynthesis	C-4 methylsterol oxidase activity					YGR060W	YGR060W||ebi.ac.uk:Database:sgd;A_06_P3280||www.chem.agilent.com:Database:agp		A_06_P3280	1085345	OLIGO	2.328333337	1.693333332	12	10	1	975			301	209	1	.05042259153	1	1	0	0	0	0	0	0	0	0	1	25686.7	18005.15	1	342.1808	22.38258
976						16	C	470471	469923							YPL044C	YPL044C||ebi.ac.uk:Database:sgd;A_06_P6803||www.chem.agilent.com:Database:agp		A_06_P6803	1084883	OLIGO	2.540000004	1.693333332	13	10	1	976			322	208	1	.3917471061	1	1	0	0	0	0	0	0	0	0	0	35.30597	86.61451	1	7.064066	22.16788
977					ERG8	13	W	712315	713670	ergosterol biosynthesis*	phosphomevalonate kinase activity					YMR220W	YMR220W||ebi.ac.uk:Database:sgd;A_06_P5659||www.chem.agilent.com:Database:agp		A_06_P5659	1083622	OLIGO	2.751666671	1.693333332	14	10	1	977			343	210	1	.05029739229	1	1	0	0	0	0	0	0	0	0	1	2996.58	2409.503	1	45.74233	22.28159
978					VAM6	4	C	320120	316971	vacuole organization and biogenesis*	Rab guanyl-nucleotide exchange factor activity					YDL077C	YDL077C||ebi.ac.uk:Database:sgd;A_06_P1806||www.chem.agilent.com:Database:agp		A_06_P1806	1081797	OLIGO	2.963333338	1.693333332	15	10	1	978			364	208	1	.06554573558	1	1	0	0	0	0	0	0	0	0	0	430.5983	662.6177	1	11.32901	22.16667
979						7	W	546445	547473	biological process unknown	molecular function unknown					YGR031W	YGR031W||ebi.ac.uk:Database:sgd;A_06_P3251||www.chem.agilent.com:Database:agp		A_06_P3251	1081890	OLIGO	3.175000005	1.693333332	16	10	1	979			385	209	1	.05499865652	1	1	0	0	0	0	0	0	0	0	1	869.5322	931.9251	1	18.07351	22.19065
980						13	W	272193	272663	biological process unknown	molecular function unknown					YMR002W	YMR002W||ebi.ac.uk:Database:sgd;A_06_P5429||www.chem.agilent.com:Database:agp		A_06_P5429	1086700	OLIGO	3.386666672	1.693333332	17	10	1	980			407	208	1	.04932458048	1	1	0	0	0	0	0	0	0	0	1	5594.705	5956.649	1	77.74102	21.97692
981					GIM3	14	C	346058	345669	tubulin folding	tubulin binding					YNL153C	YNL153C||ebi.ac.uk:Database:sgd;A_06_P5924||www.chem.agilent.com:Database:agp		A_06_P5924	1081026	OLIGO	3.598333339	1.693333332	18	10	1	981			428	209	1	.05170345612	1	1	0	0	0	0	0	0	0	0	1	1335.381	1476.431	1	17.98635	22.11364
982					CLG1	7	W	87980	89338	cell cycle	cyclin-dependent protein kinase regulator activity					YGL215W	YGL215W||ebi.ac.uk:Database:sgd;A_06_P3170||www.chem.agilent.com:Database:agp		A_06_P3170	1083039	OLIGO	3.810000006	1.693333332	19	10	1	982			449	208	1	.05686710071	1	1	0	0	0	0	0	0	0	0	0	721.2193	1207.957	1	12.21425	22.01465
983						2	C	699938	698349	biological process unknown	molecular function unknown					YBR239C	YBR239C||ebi.ac.uk:Database:sgd;A_06_P1493||www.chem.agilent.com:Database:agp		A_06_P1493	1085110	OLIGO	4.021666673	1.693333332	20	10	1	983			470	210	1	.1232316659	1	1	0	0	0	0	0	0	0	0	1	196.7377	195.4446	1	6.999761	22.35798
984					QRI8	13	W	318679	319176	chromatin assembly or disassembly*	ubiquitin-protein ligase activity*					YMR022W	YMR022W||ebi.ac.uk:Database:sgd;A_06_P5450||www.chem.agilent.com:Database:agp		A_06_P5450	1080886	OLIGO	4.23333334	1.693333332	21	10	1	984			491	208	1	.05121046993	1	1	0	0	0	0	0	0	0	0	1	1526.298	1828.051	1	23.03756	22.24444
985					CCT4	4	W	199997	201583	protein folding*	unfolded protein binding					YDL143W	YDL143W||ebi.ac.uk:Database:sgd;A_06_P1876||www.chem.agilent.com:Database:agp		A_06_P1876	1083005	OLIGO	4.445000007	1.693333332	22	10	1	985			512	210	1	.04928914753	1	1	0	0	0	0	0	0	0	0	1	5679.341	5749.085	1	77.8133	22.33818
986					SKG3	12	W	524867	527947	biological process unknown	molecular function unknown					YLR187W	YLR187W||ebi.ac.uk:Database:sgd;A_06_P5001||www.chem.agilent.com:Database:agp		A_06_P5001	1081353	OLIGO	4.656666674	1.693333332	23	10	1	986			534	208	1	.09038447081	1	1	0	0	0	0	0	0	0	0	1	282.3366	302.3631	1	8.595141	22.14855
987					CIN4	13	W	545154	545729	microtubule-based process	GTP binding					YMR138W	YMR138W||ebi.ac.uk:Database:sgd;A_06_P5570||www.chem.agilent.com:Database:agp		A_06_P5570	1082481	OLIGO	4.868333341	1.693333332	24	10	1	987			554	210	1	.09430130884	1	1	0	0	0	0	0	0	0	0	1	288.7042	262.7326	1	9.622579	22.3668
988						4	C	720298	718811	biological process unknown	molecular function unknown					YDR132C	YDR132C||ebi.ac.uk:Database:sgd;A_06_P2120||www.chem.agilent.com:Database:agp		A_06_P2120	1084653	OLIGO	5.080000008	1.693333332	25	10	1	988			576	209	1	.1002883881	1	1	0	0	0	0	0	0	0	0	1	305.0947	211.9811	1	10.64041	22.41516
989						12	W	948365	949189	biological process unknown	molecular function unknown					YLR412W	YLR412W||ebi.ac.uk:Database:sgd;A_06_P5230||www.chem.agilent.com:Database:agp		A_06_P5230	1085006	OLIGO	5.291666675	1.693333332	26	10	1	989			597	209	1	.09490147832	1	1	0	0	0	0	0	0	0	0	1	314.5684	238.12	1	11.3071	22.21053
990					AAD16	6	C	14763	14305	aldehyde metabolism	aryl-alcohol dehydrogenase activity					YFL057C	YFL057C||ebi.ac.uk:Database:sgd;A_06_P2883||www.chem.agilent.com:Database:agp		A_06_P2883	1080780	OLIGO	5.503333342	1.693333332	27	10	1	990			618	208	1	.05619873513	1	1	0	0	0	0	0	0	0	0	1	819.5704	805.6147	1	14.78808	22.21053
991					ATG11	16	C	664670	661134	protein-vacuolar targeting*	molecular function unknown					YPR049C	YPR049C||ebi.ac.uk:Database:sgd;A_06_P7095||www.chem.agilent.com:Database:agp		A_06_P7095	1082537	OLIGO	5.715000009	1.693333332	28	10	1	991			640	210	1	.05572592956	1	1	0	0	0	0	0	0	0	0	1	825.043	863.7087	1	17.35626	21.92364
992					PAN2	7	C	334468	331121	postreplication repair*	poly(A)-specific ribonuclease activity					YGL094C	YGL094C||ebi.ac.uk:Database:sgd;A_06_P3049||www.chem.agilent.com:Database:agp		A_06_P3049	1083948	OLIGO	5.926666676	1.693333332	29	10	1	992			661	209	1	.06469157714	1	1	0	0	0	0	0	0	0	0	1	559.285	499.0193	1	12.94121	22.75273
993					VBA3	3	W	9706	11082	basic amino acid transport	basic amino acid permease activity					YCL069W	YCL069W||ebi.ac.uk:Database:sgd;A_06_P1619||www.chem.agilent.com:Database:agp		A_06_P1619	1081931	OLIGO	6.138333343	1.693333332	30	10	1	993			683	210	1	.6727773201	1	1	0	0	0	0	0	0	0	0	0	36.2562	29.99836	1	5.90653	22.69697
994						9	C	301255	300827	biological process unknown	molecular function unknown					YIL029C	YIL029C||ebi.ac.uk:Database:sgd;A_06_P3829||www.chem.agilent.com:Database:agp		A_06_P3829	1085355	OLIGO	6.35000001	1.693333332	31	10	1	994			703	209	1	.6101485718	1	1	0	0	0	0	0	0	0	0	1	38.44837	34.50082	1	6.198338	22.66279
995					KAR5	13	W	399701	401215	karyogamy during conjugation with cellular fusion	molecular function unknown					YMR065W	YMR065W||ebi.ac.uk:Database:sgd;A_06_P5492||www.chem.agilent.com:Database:agp		A_06_P5492	1081069	OLIGO	6.561666677	1.693333332	32	10	1	995			724	209	1	.09661422648	1	1	0	0	0	0	0	0	0	0	1	307.6093	231.8682	1	10.08739	22.33333
996						16	C	28164	26611	biological process unknown	molecular function unknown					YPL272C	YPL272C||ebi.ac.uk:Database:sgd;A_06_P7033||www.chem.agilent.com:Database:agp		A_06_P7033	1083030	OLIGO	6.773333344	1.693333332	33	10	1	996			745	208	1	.08381348839	1	1	0	0	0	0	0	0	0	0	1	329.0429	323.7289	1	8.664405	22.45255
997					ADY3	4	C	28775	26403	protein complex assembly*	protein binding					YDL239C	YDL239C||ebi.ac.uk:Database:sgd;A_06_P1974||www.chem.agilent.com:Database:agp		A_06_P1974	1085978	OLIGO	6.985000011	1.693333332	34	10	1	997			766	210	1	.06169227946	1	1	0	0	0	0	0	0	0	0	0	953.9141	505.6028	1	14.95905	22.37313
998					DIT1	4	W	1274592	1276202	spore wall assembly (sensu Fungi)	catalytic activity					YDR403W	YDR403W||ebi.ac.uk:Database:sgd;A_06_P2396||www.chem.agilent.com:Database:agp		A_06_P2396	1083567	OLIGO	7.196666678	1.693333332	35	10	1	998			787	208	1	.1256120271	1	1	0	0	0	0	0	0	0	0	0	145.7603	251.5977	1	8.314267	22.77656
999						12	C	791046	790669							YLR331C	YLR331C||ebi.ac.uk:Database:sgd;A_06_P5148||www.chem.agilent.com:Database:agp		A_06_P5148	1082561	OLIGO	7.408333345	1.693333332	36	10	1	999			809	209	1	.6747435455	1	1	0	0	0	0	0	0	0	0	0	35.25524	30.71152	1	5.760402	22.93962
1000					TUS1	12	W	982890	986813	cell wall organization and biogenesis*	Rho guanyl-nucleotide exchange factor activity					YLR425W	YLR425W||ebi.ac.uk:Database:sgd;A_06_P5243||www.chem.agilent.com:Database:agp		A_06_P5243	1083386	OLIGO	7.620000012	1.693333332	37	10	1	1000			830	208	1	.054731642	1	1	0	0	0	0	0	0	0	0	0	1064.349	859.0031	1	18.40425	22.93818
1001						1	W	222397	222882	biological process unknown	molecular function unknown					YAR068W	YAR068W||ebi.ac.uk:Database:sgd;A_06_P1124||www.chem.agilent.com:Database:agp		A_06_P1124	1083799	OLIGO	7.831666679	1.693333332	38	10	1	1001			851	210	1	.04934562682	1	1	0	0	0	0	0	1	0	0	1	5023.387	5263.36	1	40.11733	22.86545
1002						14	W	437613	438317	biological process unknown	molecular function unknown					YNL100W	YNL100W||ebi.ac.uk:Database:sgd;A_06_P5871||www.chem.agilent.com:Database:agp		A_06_P5871	1085544	OLIGO	8.043333346	1.693333332	39	10	1	1002			873	209	1	.05131007272	1	1	0	0	0	0	0	0	0	0	1	1644.561	1460.174	1	25.10272	22.43019
1003					DEG1	6	W	147126	148454	RNA processing	pseudouridylate synthase activity					YFL001W	YFL001W||ebi.ac.uk:Database:sgd;A_06_P2824||www.chem.agilent.com:Database:agp		A_06_P2824	1083155	OLIGO	8.255000013	1.693333332	40	10	1	1003			894	210	1	.05126610538	1	1	0	0	0	0	0	0	0	0	1	1482.449	1574.523	1	29.01475	22.83516
1004					AFG3	5	C	191787	189502	protein complex assembly*	ATPase activity*					YER017C	YER017C||ebi.ac.uk:Database:sgd;A_06_P2640||www.chem.agilent.com:Database:agp		A_06_P2640	1081730	OLIGO	8.46666668	1.693333332	41	10	1	1004			914	209	1	.05421243931	1	1	0	0	0	0	0	0	0	0	0	923.056	1306.75	1	13.67036	22.46154
1005					SSK2	14	C	685433	680694	protein amino acid phosphorylation*	MAP kinase kinase kinase activity					YNR031C	YNR031C||ebi.ac.uk:Database:sgd;A_06_P6142||www.chem.agilent.com:Database:agp		A_06_P6142	1085962	OLIGO	8.678333347	1.693333332	42	10	1	1005			935	209	1	.0508072125	1	1	0	0	0	0	0	0	0	0	1	2052.47	1730.808	1	22.24979	22.54286
1006					CSL4	14	W	214922	215800	35S primary transcript processing*	3'-5'-exoribonuclease activity					YNL232W	YNL232W||ebi.ac.uk:Database:sgd;A_06_P6004||www.chem.agilent.com:Database:agp		A_06_P6004	1085348	OLIGO	8.890000014	1.693333332	43	10	1	1006			956	209	1	.05230044546	1	1	0	0	0	0	0	0	0	0	1	1234.301	1239.12	1	23.71012	22.23551
1007					TRX1	12	C	232014	231703	ER to Golgi transport*	thiol-disulfide exchange intermediate activity					YLR043C	YLR043C||ebi.ac.uk:Database:sgd;A_06_P4855||www.chem.agilent.com:Database:agp		A_06_P4855	1086800	OLIGO	9.101666681	1.693333332	44	10	1	1007			978	209	1	.05003968283	1	1	0	0	0	0	0	0	0	0	1	3491.651	4441.028	1	48.96446	22.33333
1008					RIM15	6	C	74425	69113	protein amino acid phosphorylation*	protein kinase activity					YFL033C	YFL033C||ebi.ac.uk:Database:sgd;A_06_P2859||www.chem.agilent.com:Database:agp		A_06_P2859	1082791	OLIGO	9.313333348	1.693333332	45	10	1	1008			999	209	1	.05068983862	1	1	0	0	0	0	0	0	0	0	1	1810.133	1757.524	1	35.68964	22.23774
1009					NFI1	15	C	630540	628360	protein sumoylation*	SUMO ligase activity					YOR156C	YOR156C||ebi.ac.uk:Database:sgd;A_06_P6518||www.chem.agilent.com:Database:agp		A_06_P6518	1080908	OLIGO	9.525000015	1.693333332	46	10	1	1009			1020	209	1	.09269740558	1	1	0	0	0	0	0	0	0	0	1	243.6272	328.621	1	8.788723	22.47893
1010					FOL2	7	C	1025741	1025010	folic acid and derivative biosynthesis	GTP cyclohydrolase I activity					YGR267C	YGR267C||ebi.ac.uk:Database:sgd;A_06_P3488||www.chem.agilent.com:Database:agp		A_06_P3488	1082624	OLIGO	9.736666682	1.693333332	47	10	1	1010			1042	208	1	.0493530507	1	1	0	0	0	0	0	0	0	0	1	5771.65	5356.149	1	84.26096	22.53817
1011					FIG4	14	C	31377	28738	cellular morphogenesis during conjugation with cellular fusion	polyphosphoinositide phosphatase activity					YNL325C	YNL325C||ebi.ac.uk:Database:sgd;A_06_P6097||www.chem.agilent.com:Database:agp		A_06_P6097	1082661	OLIGO	9.948333349	1.693333332	48	10	1	1011			1063	210	1	.05551319198	1	1	0	0	0	0	0	0	0	0	1	873.6997	843.5724	1	15.38657	22.60517
1012					PRM6	13	C	181075	180017	conjugation with cellular fusion	molecular function unknown					YML047C	YML047C||ebi.ac.uk:Database:sgd;A_06_P5333||www.chem.agilent.com:Database:agp		A_06_P5333	1083880	OLIGO	10.160000016	1.693333332	49	10	1	1012			1084	208	1	.6642224988	1	1	0	0	0	0	0	0	0	0	0	36.45216	30.62883	1	5.340009	22.40441
1013						14	C	743538	742879	biological process unknown	molecular function unknown					YNR061C	YNR061C||ebi.ac.uk:Database:sgd;A_06_P6174||www.chem.agilent.com:Database:agp		A_06_P6174	1084257	OLIGO	10.371666683	1.693333332	50	10	1	1013			1105	209	1	.06027566577	1	1	0	0	0	0	0	0	0	0	0	561.8342	780.1498	1	11.59121	22.44048
1014					RCK2	12	W	634254	636086	protein amino acid phosphorylation*	protein serine/threonine kinase activity					YLR248W	YLR248W||ebi.ac.uk:Database:sgd;A_06_P5062||www.chem.agilent.com:Database:agp		A_06_P5062	1082296	OLIGO	10.58333335	1.693333332	51	10	1	1014			1126	209	1	.05078628838	1	1	0	0	0	0	0	0	0	0	0	3922.953	2776.317	1	47.00309	22.78467
1015						11	C	136028	135795							YKL165C-A	YKL165C-A||ebi.ac.uk:Database:sgd;A_06_P4578||www.chem.agilent.com:Database:agp		A_06_P4578	1081418	OLIGO	10.795000017	1.693333332	52	10	1	1015			1147	209	1	.695414676	1	1	0	0	0	0	0	0	0	0	0	33.08186	30.83796	1	4.807297	22.3221
1016						13	C	565908	565573							YMR153C-A	YMR153C-A||ebi.ac.uk:Database:sgd;A_06_P5585||www.chem.agilent.com:Database:agp		A_06_P5585	1081153	OLIGO	11.006666684	1.693333332	53	10	1	1016			1169	209	1	.208769464	1	1	0	0	0	0	0	0	0	0	1	93.80176	126.4981	1	7.102658	22.61852
1017					PMT5	4	W	289909	292140	protein amino acid O-linked glycosylation	dolichyl-phosphate-mannose-protein mannosyltransferase activity					YDL093W	YDL093W||ebi.ac.uk:Database:sgd;A_06_P1823||www.chem.agilent.com:Database:agp		A_06_P1823	1081734	OLIGO	11.218333351	1.693333332	54	10	1	1017			1189	209	1	.05403183893	1	1	0	0	0	0	0	0	0	0	0	933.1394	1095.853	1	13.77302	22.39338
1018						17	W	4254	4415							Q0017	Q0017||ebi.ac.uk:Database:sgd;A_06_P1002||www.chem.agilent.com:Database:agp		A_06_P1002	1083850	OLIGO	11.430000018	1.693333332	55	10	1	1018			1211	208	1	.06082193006	1	1	0	0	0	0	0	0	0	0	0	532.1187	860.2492	1	9.783757	22.6065
1019						10	W	627254	628240	biological process unknown	lipase activity					YJR107W	YJR107W||ebi.ac.uk:Database:sgd;A_06_P4350||www.chem.agilent.com:Database:agp		A_06_P4350	1080625	OLIGO	11.641666685	1.693333332	56	10	1	1019			1232	209	1	.05311511413	1	1	0	0	0	0	0	0	0	0	1	1059.035	1164.465	1	16.83082	22.4084
1020					MRC1	3	C	22106	18816	chromatin silencing at telomere*	molecular function unknown					YCL061C	YCL061C||ebi.ac.uk:Database:sgd;A_06_P1612||www.chem.agilent.com:Database:agp		A_06_P1612	1081029	OLIGO	11.853333352	1.693333332	57	10	1	1020			1253	209	1	.07009847497	1	1	0	0	0	0	0	0	0	0	1	475.3985	415.6726	1	10.90649	22.76557
1021					HIF1	12	C	100200	99043	chromatin silencing at telomere	molecular function unknown					YLL022C	YLL022C||ebi.ac.uk:Database:sgd;A_06_P4767||www.chem.agilent.com:Database:agp		A_06_P4767	1086559	OLIGO	12.065000019	1.693333332	58	10	1	1021			1274	210	1	.05104922299	1	1	0	0	0	0	0	0	0	0	1	1572.043	1801.111	1	22.93288	22.30597
1022						15	W	903038	903367							YOR314W	YOR314W||ebi.ac.uk:Database:sgd;A_06_P6677||www.chem.agilent.com:Database:agp		A_06_P6677	1086223	OLIGO	12.276666686	1.693333332	59	10	1	1022			1296	208	1	.3925361085	1	1	0	0	0	0	0	0	0	0	1	49.57397	64.95013	1	6.783953	22.6194
1023						3	C	50627	50133							YCL041C	YCL041C||ebi.ac.uk:Database:sgd;A_06_P1593||www.chem.agilent.com:Database:agp		A_06_P1593	1082285	OLIGO	12.488333353	1.693333332	60	10	1	1023			1317	209	1	.466322352	1	1	0	0	0	0	0	0	0	0	1	38.77967	58.13592	1	7.122689	22.673
1024					VPS24	11	W	359787	360461	late endosome to vacuole transport*	molecular function unknown					YKL041W	YKL041W||ebi.ac.uk:Database:sgd;A_06_P4450||www.chem.agilent.com:Database:agp		A_06_P4450	1081335	OLIGO	12.70000002	1.693333332	61	10	1	1024			1337	208	1	.0588317091	1	1	0	0	0	0	0	0	0	0	1	717.85	657.8455	1	12.58122	22.46014
1025						12	C	395521	394766	biological process unknown	molecular function unknown					YLR126C	YLR126C||ebi.ac.uk:Database:sgd;A_06_P4939||www.chem.agilent.com:Database:agp		A_06_P4939	1080875	OLIGO	12.911666687	1.693333332	62	10	1	1025			1359	210	1	.05691445196	1	1	0	0	0	0	0	0	0	0	0	1711.603	847.1646	1	25.95952	22.81884
1026						6	W	51350	52972	biological process unknown	molecular function unknown					YFL040W	YFL040W||ebi.ac.uk:Database:sgd;A_06_P2867||www.chem.agilent.com:Database:agp		A_06_P2867	1086165	OLIGO	13.123333354	1.693333332	63	10	1	1026			1380	209	1	.616768341	0	0	0	0	0	0	0	0	0	0	0	33.68173	38.51765	1	5.454736	22.11852
1027					UME6	4	C	867517	865007	sporulation (sensu Fungi)*	DNA binding*					YDR207C	YDR207C||ebi.ac.uk:Database:sgd;A_06_P2196||www.chem.agilent.com:Database:agp		A_06_P2196	1086657	OLIGO	13.335000021	1.693333332	64	10	1	1027			1401	210	1	.1802153222	1	1	0	0	0	0	0	1	0	0	1	130.7209	124.9504	1	7.555531	22.18182
1028						4	C	894496	894113							YDR215C	YDR215C||ebi.ac.uk:Database:sgd;A_06_P2204||www.chem.agilent.com:Database:agp		A_06_P2204	1086442	OLIGO	13.546666688	1.693333332	65	10	1	1028			1423	209	1	.635182844	1	1	0	0	0	0	0	0	0	0	0	32.90872	37.16571	1	3.933429	22.05204
1029					FLR1	2	C	254210	252564	response to toxin	multidrug transporter activity					YBR008C	YBR008C||ebi.ac.uk:Database:sgd;A_06_P1255||www.chem.agilent.com:Database:agp		A_06_P1255	1085589	OLIGO	13.758333355	1.693333332	66	10	1	1029			1444	210	1	.05400626786	1	1	0	0	0	0	0	0	0	0	1	962.3634	1022.945	1	18.25394	22.4052
1030					ALA1	15	C	949104	946228	alanyl-tRNA aminoacylation	alanine-tRNA ligase activity					YOR335C	YOR335C||ebi.ac.uk:Database:sgd;A_06_P6699||www.chem.agilent.com:Database:agp		A_06_P6699	1084771	OLIGO	13.970000022	1.693333332	67	10	1	1030			1465	209	1	.05014272299	1	1	0	0	0	0	0	0	0	0	1	7479.097	5561.645	1	92.74031	22.47535
1031					XBP1	9	C	177247	175304	response to stress	transcription factor activity					YIL101C	YIL101C||ebi.ac.uk:Database:sgd;A_06_P3900||www.chem.agilent.com:Database:agp		A_06_P3900	1081287	OLIGO	14.181666689	1.693333332	68	10	1	1031			1486	210	1	.07021424151	1	1	0	0	0	0	0	0	0	0	0	345.9768	649.1246	1	10.47634	22.59636
1032					PGU1	10	W	722730	723815	pseudohyphal growth*	polygalacturonase activity					YJR153W	YJR153W||ebi.ac.uk:Database:sgd;A_06_P4397||www.chem.agilent.com:Database:agp		A_06_P4397	1086521	OLIGO	14.393333356	1.693333332	69	10	1	1032			1507	209	1	.6198459548	1	1	0	0	0	0	0	0	0	0	1	39.54452	32.42401	1	6.628076	22.17343
1033						13	W	655075	658341	biological process unknown	molecular function unknown					YMR196W	YMR196W||ebi.ac.uk:Database:sgd;A_06_P5635||www.chem.agilent.com:Database:agp		A_06_P5635	1083754	OLIGO	14.605000023	1.693333332	70	10	1	1033			1528	210	1	.05122032052	1	1	0	0	0	0	0	0	0	0	0	6778.964	4376.368	1	91.80976	22.53053
1034						8	W	17390	17839							YHL041W	YHL041W||ebi.ac.uk:Database:sgd;A_06_P3559||www.chem.agilent.com:Database:agp		A_06_P3559	1081889	OLIGO	14.81666669	1.693333332	71	10	1	1034			1550	208	1	.6650683551	1	1	0	0	0	0	0	0	0	0	0	33.67946	33.14622	1	4.896902	22.65504
1035					YRF1-1	4	W	1526304	1531694	telomerase-independent telomere maintenance	DNA helicase activity					YDR545W	YDR545W||ebi.ac.uk:Database:sgd;A_06_P2539||www.chem.agilent.com:Database:agp		A_06_P2539	1081111	OLIGO	15.028333357	1.693333332	72	10	1	1035			1571	210	1	.04924049743	1	1	0	0	0	0	0	0	0	0	1	21865.14	19864.15	1	250.2419	22.56977
1036					MIF2	11	W	273039	274688	chromosome segregation*	centromeric DNA binding					YKL089W	YKL089W||ebi.ac.uk:Database:sgd;A_06_P4499||www.chem.agilent.com:Database:agp		A_06_P4499	1086392	OLIGO	15.240000024	1.693333332	73	10	1	1036			1592	209	1	.07547394173	1	1	0	0	0	0	0	0	0	0	0	483.1324	321.7921	1	12.0455	22.68613
1037					IME2	10	W	221307	223244	protein amino acid phosphorylation*	protein kinase activity					YJL106W	YJL106W||ebi.ac.uk:Database:sgd;A_06_P4128||www.chem.agilent.com:Database:agp		A_06_P4128	1085227	OLIGO	15.451666691	1.693333332	74	10	1	1037			1612	210	1	.3564893096	1	1	0	0	0	0	0	0	0	0	1	83.23261	46.10446	1	7.640127	22.50193
1038					POP5	1	W	82707	83228	rRNA processing*	ribonuclease P activity*					YAL033W	YAL033W||ebi.ac.uk:Database:sgd;A_06_P1055||www.chem.agilent.com:Database:agp		A_06_P1055	1086781	OLIGO	15.663333358	1.693333332	75	10	1	1038			1634	209	1	.05518066404	1	1	0	0	0	0	0	0	0	0	1	870.7336	895.3274	1	16.30611	22.53986
1039						16	W	790079	791116	biological process unknown	molecular function unknown					YPR127W	YPR127W||ebi.ac.uk:Database:sgd;A_06_P7174||www.chem.agilent.com:Database:agp		A_06_P7174	1085686	OLIGO	15.875000025	1.693333332	76	10	1	1039			1655	209	1	.05094465415	1	1	0	0	0	0	0	0	0	0	0	2040.18	2773.899	1	34.15173	22.55133
1040					PRE4	6	C	249853	249053	ubiquitin-dependent protein catabolism	endopeptidase activity					YFR050C	YFR050C||ebi.ac.uk:Database:sgd;A_06_P2948||www.chem.agilent.com:Database:agp		A_06_P2948	1082511	OLIGO	16.086666692	1.693333332	77	10	1	1040			1676	208	1	.04961924534	1	1	0	0	0	0	0	0	0	0	1	3425.344	3784.154	1	48.88865	22.85926
1041					SRD1	3	C	148900	148235	rRNA processing	molecular function unknown					YCR018C	YCR018C||ebi.ac.uk:Database:sgd;A_06_P1639||www.chem.agilent.com:Database:agp		A_06_P1639	1080896	OLIGO	16.298333359	1.693333332	78	10	1	1041			1697	209	1	.6652481845	1	1	0	0	0	0	0	0	0	0	1	37.63946	29.50127	1	6.048202	22.58935
1042					HYR1	9	W	423125	423616	response to oxidative stress	thiol peroxidase activity*					YIR037W	YIR037W||ebi.ac.uk:Database:sgd;A_06_P4014||www.chem.agilent.com:Database:agp		A_06_P4014	1081583	OLIGO	16.510000026	1.693333332	79	10	1	1042			1719	208	1	.04953059355	1	1	0	0	0	0	0	0	0	0	1	3601.713	3814.512	1	59.32312	22.7283
1043					CCZ1	2	W	497157	499271	protein-vacuolar targeting*	guanyl-nucleotide exchange factor activity					YBR131W	YBR131W||ebi.ac.uk:Database:sgd;A_06_P1383||www.chem.agilent.com:Database:agp		A_06_P1383	1080708	OLIGO	16.721666693	1.693333332	80	10	1	1043			1740	210	1	.05456498929	1	1	0	0	0	0	0	0	0	0	1	925.5824	942.7734	1	18.00094	22.57836
1044					SHU2	4	C	602865	602194	error-free DNA repair	molecular function unknown					YDR078C	YDR078C||ebi.ac.uk:Database:sgd;A_06_P2065||www.chem.agilent.com:Database:agp		A_06_P2065	1084922	OLIGO	16.93333336	1.693333332	81	10	1	1044			1760	209	1	.159503254	1	1	0	0	0	0	0	0	0	0	1	179.1814	118.2174	1	7.719631	22.81955
1045					RPL20A	13	C	754196	753224	protein biosynthesis	structural constituent of ribosome					YMR242C	YMR242C||ebi.ac.uk:Database:sgd;A_06_P5681||www.chem.agilent.com:Database:agp		A_06_P5681	1083119	OLIGO	17.145000027	1.693333332	82	10	1	1045			1782	210	1	.05002974377	1	1	0	0	0	0	0	0	0	0	1	14254.67	10650.53	1	135.8029	22.65441
1046					HEM3	4	C	93746	92763	heme biosynthesis	hydroxymethylbilane synthase activity					YDL205C	YDL205C||ebi.ac.uk:Database:sgd;A_06_P1940||www.chem.agilent.com:Database:agp		A_06_P1940	1083908	OLIGO	17.356666694	1.693333332	83	10	1	1046			1803	208	1	.05140783974	1	1	0	0	0	0	0	0	0	0	0	1982.543	2893.237	1	29.78726	22.19925
1047						15	W	493265	494470	biological process unknown	molecular function unknown					YOR091W	YOR091W||ebi.ac.uk:Database:sgd;A_06_P6453||www.chem.agilent.com:Database:agp		A_06_P6453	1083875	OLIGO	17.568333361	1.693333332	84	10	1	1047			1825	210	1	.05184211034	1	1	0	0	0	0	0	0	0	0	1	1426.581	1299.779	1	22.6496	22.57875
1048					MPH3	10	C	739731	737923	carbohydrate transport	carbohydrate transporter activity*					YJR160C	YJR160C||ebi.ac.uk:Database:sgd;A_06_P4404||www.chem.agilent.com:Database:agp		A_06_P4404	1086751	OLIGO	17.780000028	1.693333332	85	10	1	1048			1846	209	1	.3547900883	1	1	0	0	0	0	0	0	0	0	1	66.8181	59.46945	1	7.047851	22.58052
1049					TPO2	7	C	765611	763767	polyamine transport	spermine transporter activity					YGR138C	YGR138C||ebi.ac.uk:Database:sgd;A_06_P3359||www.chem.agilent.com:Database:agp		A_06_P3359	1086653	OLIGO	17.991666695	1.693333332	86	10	1	1049			1867	209	1	.06033758535	1	1	0	0	0	0	0	0	0	0	0	3257.535	9704.422	1	47.54589	22.37023
1050					LOC1	6	W	149105	149719	ribosomal large subunit biogenesis*	mRNA binding					YFR001W	YFR001W||ebi.ac.uk:Database:sgd;A_06_P2895||www.chem.agilent.com:Database:agp		A_06_P2895	1082486	OLIGO	18.203333362	1.693333332	87	10	1	1050			1888	209	1	.05116504027	1	1	0	0	0	0	0	0	0	0	1	1584.144	1531.032	1	25.6508	22.23443
1051						16	C	560763	560566							YPR002C-A	YPR002C-A||ebi.ac.uk:Database:sgd;A_06_P7046||www.chem.agilent.com:Database:agp		A_06_P7046	1084166	OLIGO	18.415000029	1.693333332	88	10	1	1051			1909	210	1	.05537345545	1	1	0	0	0	0	0	0	0	0	0	814.1373	967.1893	1	12.70661	22.7658
1052					RIM4	8	W	56646	58787	meiosis*	RNA binding					YHL024W	YHL024W||ebi.ac.uk:Database:sgd;A_06_P3542||www.chem.agilent.com:Database:agp		A_06_P3542	1084076	OLIGO	18.626666696	1.693333332	89	10	1	1052			1930	209	1	.1413782067	1	1	0	0	0	0	0	1	0	0	0	117.2052	235.5794	1	8.83848	22.65543
1053						14	C	755033	753723	biological process unknown	molecular function unknown					YNR066C	YNR066C||ebi.ac.uk:Database:sgd;A_06_P6179||www.chem.agilent.com:Database:agp		A_06_P6179	1085230	OLIGO	18.838333363	1.693333332	90	10	1	1053			1952	210	1	.3527600698	1	1	0	0	0	0	0	0	0	0	1	48.72725	81.00991	1	6.527635	22.51908
1054						7	W	358639	359031	biological process unknown	molecular function unknown					YGL080W	YGL080W||ebi.ac.uk:Database:sgd;A_06_P3035||www.chem.agilent.com:Database:agp		A_06_P3035	1083295	OLIGO	19.05000003	1.693333332	91	10	1	1054			1973	208	1	.3010281884	1	1	0	0	0	0	0	0	0	0	1	71.37965	77.95781	1	6.472134	22.32584
1055					TFB3	4	W	1383801	1384766	transcription initiation from RNA polymerase II promoter*	general RNA polymerase II transcription factor activity					YDR460W	YDR460W||ebi.ac.uk:Database:sgd;A_06_P2453||www.chem.agilent.com:Database:agp		A_06_P2453	1084112	OLIGO	19.261666697	1.693333332	92	10	1	1055			1994	210	1	.05256674204	1	1	0	0	0	0	0	0	0	0	0	1566.595	1173.899	1	30.49519	22.47388
1056					UBP9	5	W	355462	357726	protein deubiquitination	ubiquitin-specific protease activity					YER098W	YER098W||ebi.ac.uk:Database:sgd;A_06_P2731||www.chem.agilent.com:Database:agp		A_06_P2731	1086830	OLIGO	19.473333364	1.693333332	93	10	1	1056			2015	208	1	.08948944214	1	1	0	0	0	0	0	0	0	0	1	290.7745	301.9497	1	10.96143	22.16791
1057						8	C	400850	399270	biological process unknown	molecular function unknown					YHR151C	YHR151C||ebi.ac.uk:Database:sgd;A_06_P3729||www.chem.agilent.com:Database:agp		A_06_P3729	1085950	OLIGO	19.685000031	1.693333332	94	10	1	1057			2036	210	1	.06438949481	1	1	0	0	0	0	0	0	0	0	0	467.7482	636.6703	1	10.73693	22.79026
1058					CCH1	7	W	924699	930818	calcium ion transport	calcium channel activity					YGR217W	YGR217W||ebi.ac.uk:Database:sgd;A_06_P3438||www.chem.agilent.com:Database:agp		A_06_P3438	1081566	OLIGO	19.896666698	1.693333332	95	10	1	1058			2057	209	1	.05195349671	1	1	0	0	0	0	0	0	0	0	1	1322.191	1304.362	1	24.56048	22.85496
1059					APL1	10	W	445837	447939	vesicle-mediated transport	molecular function unknown					YJR005W	YJR005W||ebi.ac.uk:Database:sgd;A_06_P4251||www.chem.agilent.com:Database:agp		A_06_P4251	1082207	OLIGO	20.108333365	1.693333332	96	10	1	1059			2079	209	1	.05696984272	1	1	0	0	0	0	0	0	0	0	1	746.1096	795.418	1	13.90458	22.60223
1060					CUE5	15	W	408424	409659	biological process unknown	molecular function unknown					YOR042W	YOR042W||ebi.ac.uk:Database:sgd;A_06_P6404||www.chem.agilent.com:Database:agp		A_06_P6404	1082091	OLIGO	20.320000032	1.693333332	97	10	1	1060			2100	209	1	.05025905016	1	1	0	0	0	0	0	0	0	0	1	2144.006	2071.63	1	32.29012	22.81343
1061					SSH4	11	W	210239	211978	biological process unknown	molecular function unknown					YKL124W	YKL124W||ebi.ac.uk:Database:sgd;A_06_P4536||www.chem.agilent.com:Database:agp		A_06_P4536	1082918	OLIGO	20.531666699	1.693333332	98	10	1	1061			2121	209	1	.09885850083	1	1	0	0	0	0	0	0	0	0	1	255.9215	260.7713	1	11.27281	22.76316
1062						8	C	266839	262802	biological process unknown	molecular function unknown					YHR080C	YHR080C||ebi.ac.uk:Database:sgd;A_06_P3655||www.chem.agilent.com:Database:agp		A_06_P3655	1082833	OLIGO	20.743333366	1.693333332	99	10	1	1062			2142	209	1	.05044216939	1	1	0	0	0	0	0	0	0	0	1	2202.588	1944.278	1	37.56627	23.07011
1063					CBK1	14	W	332597	334867	regulation of exit from mitosis*	protein kinase activity					YNL161W	YNL161W||ebi.ac.uk:Database:sgd;A_06_P5932||www.chem.agilent.com:Database:agp		A_06_P5932	1082451	OLIGO	20.955000033	1.693333332	100	10	1	1063			2163	210	1	.05274671357	1	1	0	0	0	0	0	0	0	0	1	1141.64	1170.967	1	20.62936	23.28889
1064					RPS25A	7	C	534462	534136	protein biosynthesis	structural constituent of ribosome					YGR027C	YGR027C||ebi.ac.uk:Database:sgd;A_06_P3247||www.chem.agilent.com:Database:agp		A_06_P3247	1083330	OLIGO	21.1666667	1.693333332	101	10	1	1064			2184	209	1	.04918081861	1	1	0	0	0	0	0	0	0	0	1	34602.94	36895.14	1	387.4325	23.22388
1065					ATG15	3	W	237209	238771	autophagy*	lipase activity					YCR068W	YCR068W||ebi.ac.uk:Database:sgd;A_06_P1690||www.chem.agilent.com:Database:agp		A_06_P1690	1086614	OLIGO	21.378333367	1.693333332	102	10	1	1065			2205	209	1	.2621477186	1	1	0	0	0	0	0	0	0	0	1	82.77131	89.44281	1	7.102075	23.34657
1066					MRPL9	7	C	936886	936077	protein biosynthesis*	structural constituent of ribosome*					YGR220C	YGR220C||ebi.ac.uk:Database:sgd;A_06_P3441||www.chem.agilent.com:Database:agp		A_06_P3441	1086184	OLIGO	21.590000034	1.693333332	103	10	1	1066			2227	208	1	.05067011486	1	1	0	0	0	0	0	0	0	0	1	1759.089	1931.653	1	28.98564	22.75277
1067						1	W	218540	219136	biological process unknown	molecular function unknown					YAR062W	YAR062W||ebi.ac.uk:Database:sgd;A_06_P1121||www.chem.agilent.com:Database:agp		A_06_P1121	1083927	OLIGO	21.801666701	1.693333332	104	10	1	1067			2248	210	1	.4556827648	1	1	0	0	0	0	0	0	0	0	1	46.86562	51.02894	1	6.059463	22.91544
1068					BUD5	3	C	199544	197616	pseudohyphal growth*	signal transducer activity*					YCR038C	YCR038C||ebi.ac.uk:Database:sgd;A_06_P1663||www.chem.agilent.com:Database:agp		A_06_P1663	1082619	OLIGO	22.013333368	1.693333332	105	10	1	1068			2269	209	1	.1188830884	1	1	0	0	0	0	0	0	0	0	1	182.8232	229.2477	1	7.102382	22.65799
1069						16	C	15355	15053	biological process unknown	molecular function unknown					YPL278C	YPL278C||ebi.ac.uk:Database:sgd;A_06_P7039||www.chem.agilent.com:Database:agp		A_06_P7039	1085980	OLIGO	22.225000035	1.693333332	106	10	1	1069			2290	210	1	.05352614455	1	1	0	0	0	0	0	0	0	0	0	1451.971	1022.949	1	20.57922	22.5471
1070						5	C	342607	342386							YER091C-A	YER091C-A||ebi.ac.uk:Database:sgd;A_06_P2723||www.chem.agilent.com:Database:agp		A_06_P2723	1082437	OLIGO	22.436666702	1.693333332	107	10	1	1070			2311	209	1	.5883132195	1	1	0	0	0	0	0	0	0	0	1	47.35401	29.64746	1	6.419822	21.57299
1071					PHO81	7	C	958212	954676	phosphate metabolism	cyclin-dependent protein kinase inhibitor activity					YGR233C	YGR233C||ebi.ac.uk:Database:sgd;A_06_P3454||www.chem.agilent.com:Database:agp		A_06_P3454	1081216	OLIGO	0	1.88148148	1	11	1	1071			68	228	1	.05026734881	1	1	0	0	0	0	0	0	0	0	1	5048.267	3763.071	1	69.5216	22.15129
1072					RSM19	14	C	695327	695052	protein biosynthesis	structural constituent of ribosome					YNR037C	YNR037C||ebi.ac.uk:Database:sgd;A_06_P6150||www.chem.agilent.com:Database:agp		A_06_P6150	1085157	OLIGO	.211666667	1.88148148	2	11	1	1072			89	228	1	.06670062177	1	1	0	0	0	0	0	0	0	0	0	390.7119	937.7982	1	8.159702	22.30855
1073					RIB2	15	C	204470	202695	riboflavin biosynthesis	pseudouridylate synthase activity*					YOL066C	YOL066C||ebi.ac.uk:Database:sgd;A_06_P6258||www.chem.agilent.com:Database:agp		A_06_P6258	1081766	OLIGO	.423333334	1.88148148	3	11	1	1073			110	227	1	.05946554669	1	1	0	0	0	0	0	0	0	0	1	650.6388	673.41	1	14.61327	22.24908
1074					MRPL25	7	C	637581	637108	protein biosynthesis	structural constituent of ribosome					YGR076C	YGR076C||ebi.ac.uk:Database:sgd;A_06_P3296||www.chem.agilent.com:Database:agp		A_06_P3296	1082006	OLIGO	.635000001	1.88148148	4	11	1	1074			131	228	1	.1754207304	1	1	0	0	0	0	0	1	0	0	1	140.2444	123.3839	1	8.909638	22.22305
1075					TAT1	2	C	378430	376571	amino acid transport	amino acid transporter activity					YBR069C	YBR069C||ebi.ac.uk:Database:sgd;A_06_P1317||www.chem.agilent.com:Database:agp		A_06_P1317	1082093	OLIGO	.846666668	1.88148148	5	11	1	1075			152	227	1	.5695907419	1	1	0	0	0	0	0	0	0	0	1	49.3712	30.30608	1	5.940127	22.26812
1076						2	C	167841	167521	biological process unknown	molecular function unknown					YBL028C	YBL028C||ebi.ac.uk:Database:sgd;A_06_P1157||www.chem.agilent.com:Database:agp		A_06_P1157	1084128	OLIGO	1.058333335	1.88148148	6	11	1	1076			173	228	1	.1272788192	1	1	0	0	0	0	0	0	0	0	1	170.6188	208.7033	1	6.597065	22.19101
1077					IES5	5	W	342851	343228	biological process unknown	molecular function unknown					YER092W	YER092W||ebi.ac.uk:Database:sgd;A_06_P2724||www.chem.agilent.com:Database:agp		A_06_P2724	1081989	OLIGO	1.270000002	1.88148148	7	11	1	1077			195	227	1	.05039102909	1	1	0	0	0	0	0	0	0	0	1	1958.444	2140.703	1	28.41768	22.11636
1078					FYV5	3	C	23981	23523							YCL058C	YCL058C||ebi.ac.uk:Database:sgd;A_06_P1610||www.chem.agilent.com:Database:agp		A_06_P1610	1080974	OLIGO	1.481666669	1.88148148	8	11	1	1078			216	228	1	.4242467207	1	1	0	0	0	0	0	0	0	0	1	37.38029	71.60686	1	6.912284	22.2397
1079					FRE4	14	W	739949	742108	iron-siderophore transport	ferric-chelate reductase activity					YNR060W	YNR060W||ebi.ac.uk:Database:sgd;A_06_P6173||www.chem.agilent.com:Database:agp		A_06_P6173	1082279	OLIGO	1.693333336	1.88148148	9	11	1	1079			237	227	1	.698288174	1	1	0	0	0	0	0	0	0	0	0	34.52596	29.25056	1	6.284736	22.36803
1080					PIC2	5	C	259638	258736	phosphate transport	inorganic phosphate transporter activity					YER053C	YER053C||ebi.ac.uk:Database:sgd;A_06_P2680||www.chem.agilent.com:Database:agp		A_06_P2680	1085421	OLIGO	1.905000003	1.88148148	10	11	1	1080			258	229	1	.05271652345	1	1	0	0	0	0	0	0	0	0	0	1125.771	1457.678	1	20.81082	22.30682
1081					CRF1	4	W	912093	913496	negative regulation of transcription	transcriptional repressor activity					YDR223W	YDR223W||ebi.ac.uk:Database:sgd;A_06_P2212||www.chem.agilent.com:Database:agp		A_06_P2212	1080670	OLIGO	2.11666667	1.88148148	11	11	1	1081			279	227	1	.3425945154	1	1	0	0	0	0	0	0	0	0	1	87.86022	47.25295	1	7.583293	22.16176
1082					RPC25	11	C	176486	175848	transcription from RNA polymerase III promoter	DNA-directed RNA polymerase activity					YKL144C	YKL144C||ebi.ac.uk:Database:sgd;A_06_P4556||www.chem.agilent.com:Database:agp		A_06_P4556	1085675	OLIGO	2.328333337	1.88148148	12	11	1	1082			301	228	1	.06324818359	1	1	0	0	0	0	0	0	0	0	0	634.8692	502.8368	1	17.06302	22.03297
1083						4	W	1145084	1146028	biological process unknown	molecular function unknown					YDR336W	YDR336W||ebi.ac.uk:Database:sgd;A_06_P2327||www.chem.agilent.com:Database:agp		A_06_P2327	1083599	OLIGO	2.540000004	1.88148148	13	11	1	1083			322	227	1	.08343050667	1	1	0	0	0	0	0	0	0	0	0	393.3704	279.1908	1	12.85567	22.392
1084					CBF2	7	W	767434	770304	chromosome segregation	DNA bending activity*					YGR140W	YGR140W||ebi.ac.uk:Database:sgd;A_06_P3361||www.chem.agilent.com:Database:agp		A_06_P3361	1083221	OLIGO	2.751666671	1.88148148	14	11	1	1084			343	228	1	.06158049093	1	1	0	0	0	0	0	0	0	0	1	608.7327	586.0262	1	14.66017	22.12454
1085					SNF1	4	W	1412363	1414264	protein amino acid phosphorylation*	AMP-activated protein kinase activity					YDR477W	YDR477W||ebi.ac.uk:Database:sgd;A_06_P2470||www.chem.agilent.com:Database:agp		A_06_P2470	1085173	OLIGO	2.963333338	1.88148148	15	11	1	1085			364	227	1	.05134142141	1	1	0	0	0	0	0	1	0	0	1	1624.161	1448.455	1	28.02413	21.60223
1086						12	W	840320	840913	biological process unknown	molecular function unknown					YLR356W	YLR356W||ebi.ac.uk:Database:sgd;A_06_P5173||www.chem.agilent.com:Database:agp		A_06_P5173	1083800	OLIGO	3.175000005	1.88148148	16	11	1	1086			385	228	1	.06245420147	1	1	0	0	0	0	0	0	0	0	1	536.3417	624.6916	1	12.93461	22.02593
1087					YGK3	15	C	79478	78351	protein amino acid phosphorylation*	glycogen synthase kinase 3 activity					YOL128C	YOL128C||ebi.ac.uk:Database:sgd;A_06_P6321||www.chem.agilent.com:Database:agp		A_06_P6321	1081497	OLIGO	3.386666672	1.88148148	17	11	1	1087			406	227	1	.07746938923	1	1	0	0	0	0	0	0	0	0	1	351.386	390.4523	1	9.180941	22.05018
1088					DSL1	14	C	160372	158108	retrograde transport, Golgi to ER	molecular function unknown					YNL258C	YNL258C||ebi.ac.uk:Database:sgd;A_06_P6030||www.chem.agilent.com:Database:agp		A_06_P6030	1085802	OLIGO	3.598333339	1.88148148	18	11	1	1088			428	228	1	.05332124142	1	1	0	0	0	0	0	0	0	0	0	1607.603	1089.938	1	28.05393	22.20879
1089					MBB1	10	C	60181	59855							YJL199C	YJL199C||ebi.ac.uk:Database:sgd;A_06_P4221||www.chem.agilent.com:Database:agp		A_06_P4221	1082379	OLIGO	3.810000006	1.88148148	19	11	1	1089			449	227	1	.1026226468	1	1	0	0	0	0	0	0	0	0	1	246.6678	245.2714	1	10.69071	22.63235
1090					HXT12	9	W	19847	21220	biological process unknown*	molecular function unknown*					YIL170W	YIL170W||ebi.ac.uk:Database:sgd;A_06_P3969||www.chem.agilent.com:Database:agp		A_06_P3969	1082688	OLIGO	4.021666673	1.88148148	20	11	1	1090			470	228	1	.2503707147	1	1	0	0	0	0	0	0	0	0	1	83.00942	97.97852	1	6.198587	22.5754
1091					URA6	11	C	392783	392169	'de novo' pyrimidine base biosynthesis*	uridine kinase activity					YKL024C	YKL024C||ebi.ac.uk:Database:sgd;A_06_P4432||www.chem.agilent.com:Database:agp		A_06_P4432	1084814	OLIGO	4.23333334	1.88148148	21	11	1	1091			491	227	1	.04967302325	1	1	0	0	0	0	0	0	0	0	1	3554.036	4083.372	1	43.85291	22.40299
1092					SHQ1	9	C	171502	169979	snoRNA metabolism	molecular function unknown					YIL104C	YIL104C||ebi.ac.uk:Database:sgd;A_06_P3903||www.chem.agilent.com:Database:agp		A_06_P3903	1082047	OLIGO	4.445000007	1.88148148	22	11	1	1092			512	228	1	.06944764017	1	1	0	0	0	0	0	0	0	0	1	449.4014	453.6821	1	9.507547	22.42471
1093					MRPL6	8	C	393285	392641	protein biosynthesis	structural constituent of ribosome					YHR147C	YHR147C||ebi.ac.uk:Database:sgd;A_06_P3725||www.chem.agilent.com:Database:agp		A_06_P3725	1083273	OLIGO	4.656666674	1.88148148	23	11	1	1093			533	227	1	.05419996318	1	1	0	0	0	0	0	0	0	0	0	909.2805	1134.519	1	16.80157	22.05948
1094					GLE1	4	W	88249	89865	poly(A)+ mRNA-nucleus export	molecular function unknown					YDL207W	YDL207W||ebi.ac.uk:Database:sgd;A_06_P1942||www.chem.agilent.com:Database:agp		A_06_P1942	1085503	OLIGO	4.868333341	1.88148148	24	11	1	1094			555	229	1	.05130573304	1	1	0	0	0	0	0	0	0	0	0	1961.594	1546.436	1	34.13805	22.24627
1095						4	C	1483393	1481075	biological process unknown	molecular function unknown					YDR520C	YDR520C||ebi.ac.uk:Database:sgd;A_06_P2513||www.chem.agilent.com:Database:agp		A_06_P2513	1085249	OLIGO	5.080000008	1.88148148	25	11	1	1095			576	228	1	.05559643046	1	1	0	0	0	0	0	0	0	0	1	847.4612	856.4342	1	20.49836	22.25468
1096					RPL37A	12	W	522665	523290	protein biosynthesis	structural constituent of ribosome					YLR185W	YLR185W||ebi.ac.uk:Database:sgd;A_06_P4999||www.chem.agilent.com:Database:agp		A_06_P4999	1083646	OLIGO	5.291666675	1.88148148	26	11	1	1096			597	228	1	.05005088943	1	1	0	0	0	0	0	0	0	0	1	25410.36	34282.66	1	315.7912	22.68539
1097						14	W	274367	276043	biological process unknown	molecular function unknown					YNL193W	YNL193W||ebi.ac.uk:Database:sgd;A_06_P5965||www.chem.agilent.com:Database:agp		A_06_P5965	1085650	OLIGO	5.503333342	1.88148148	27	11	1	1097			618	227	1	.06157133952	1	1	0	0	0	0	0	0	0	0	1	625.0147	573.4475	1	13.87072	22.71636
1098					DIA2	15	W	474553	476793	invasive growth (sensu Saccharomyces)*	molecular function unknown					YOR080W	YOR080W||ebi.ac.uk:Database:sgd;A_06_P6442||www.chem.agilent.com:Database:agp		A_06_P6442	1085573	OLIGO	5.715000009	1.88148148	28	11	1	1098			640	229	1	.0563240473	1	1	0	0	0	0	0	0	0	0	0	1082.479	736.3157	1	20.36686	21.98168
1099						1	W	57519	57851	biological process unknown	molecular function unknown					YAL044W-A	YAL044W-A||ebi.ac.uk:Database:sgd;A_06_P1070||www.chem.agilent.com:Database:agp		A_06_P1070	1080861	OLIGO	5.926666676	1.88148148	29	11	1	1099			660	227	1	.05795775511	1	1	0	0	0	0	0	0	0	0	0	734.2195	1502.268	1	16.85843	22.29278
1100					MVD1	14	W	701895	703085	ergosterol biosynthesis*	diphosphomevalonate decarboxylase activity					YNR043W	YNR043W||ebi.ac.uk:Database:sgd;A_06_P6156||www.chem.agilent.com:Database:agp		A_06_P6156	1082320	OLIGO	6.138333343	1.88148148	30	11	1	1100			682	228	1	.04948899442	1	1	0	0	0	0	0	0	0	0	1	3791.407	3981.339	1	57.67126	22.50758
1101					SNU13	5	W	101943	102323	nuclear mRNA splicing, via spliceosome*	RNA binding					YEL026W	YEL026W||ebi.ac.uk:Database:sgd;A_06_P2567||www.chem.agilent.com:Database:agp		A_06_P2567	1081613	OLIGO	6.35000001	1.88148148	31	11	1	1101			703	228	1	.05420084413	1	1	0	0	0	0	0	0	0	0	0	2780.43	5590.782	1	37.44764	22.61278
1102					RPL42A	14	W	331322	332154	protein biosynthesis	structural constituent of ribosome					YNL162W	YNL162W||ebi.ac.uk:Database:sgd;A_06_P5933||www.chem.agilent.com:Database:agp		A_06_P5933	1083669	OLIGO	6.561666677	1.88148148	32	11	1	1102			724	228	1	.04918969364	1	1	0	0	0	0	0	0	0	0	1	46905.53	50398.08	1	461.2178	22.74349
1103					RAX2	12	C	300252	296590	bud site selection	molecular function unknown					YLR084C	YLR084C||ebi.ac.uk:Database:sgd;A_06_P4896||www.chem.agilent.com:Database:agp		A_06_P4896	1085752	OLIGO	6.773333344	1.88148148	33	11	1	1103			745	227	1	.05114785394	1	1	0	0	0	0	0	0	0	0	1	1522.077	1698.711	1	17.08641	22.67742
1104					HAC1	6	W	75177	76145	regulation of transcription from RNA polymerase II promoter*	transcription factor activity*					YFL031W	YFL031W||ebi.ac.uk:Database:sgd;A_06_P2857||www.chem.agilent.com:Database:agp		A_06_P2857	1080737	OLIGO	6.985000011	1.88148148	34	11	1	1104			766	228	1	.05078111479	1	1	0	0	0	0	0	0	0	0	1	14203.8	9524.569	1	143.2861	22.57795
1105					WHI4	4	C	56347	54398	regulation of cell size	RNA binding					YDL224C	YDL224C||ebi.ac.uk:Database:sgd;A_06_P1959||www.chem.agilent.com:Database:agp		A_06_P1959	1083534	OLIGO	7.196666678	1.88148148	35	11	1	1105			788	227	1	.05152014736	1	1	0	0	0	0	0	1	0	0	1	1393.943	1501.318	1	23.49302	22.55642
1106					RDR1	15	W	1051286	1052926	response to xenobiotic stimulus	transcription factor activity					YOR380W	YOR380W||ebi.ac.uk:Database:sgd;A_06_P6744||www.chem.agilent.com:Database:agp		A_06_P6744	1086831	OLIGO	7.408333345	1.88148148	36	11	1	1106			809	228	1	.06538721354	1	1	0	0	0	0	0	0	0	0	0	454.3994	602.8693	1	10.24545	22.76277
1107					HTD2	8	W	230971	231813	fatty acid biosynthesis	3-hydroxyacyl-[acyl-carrier protein] dehydratase activity					YHR067W	YHR067W||ebi.ac.uk:Database:sgd;A_06_P3640||www.chem.agilent.com:Database:agp		A_06_P3640	1082313	OLIGO	7.620000012	1.88148148	37	11	1	1107			830	228	1	.07813422586	1	1	0	0	0	0	0	0	0	0	0	517.7138	278.2632	1	9.168745	22.55755
1108					SLM2	14	C	541880	539910	actin cytoskeleton organization and biogenesis*	phosphoinositide binding					YNL047C	YNL047C||ebi.ac.uk:Database:sgd;A_06_P5818||www.chem.agilent.com:Database:agp		A_06_P5818	1084175	OLIGO	7.831666679	1.88148148	38	11	1	1108			851	228	1	.05869086431	1	1	0	0	0	0	0	0	0	0	0	634.6007	781.3692	1	12.71348	22.77903
1109					CTK2	10	C	424024	423053	protein amino acid phosphorylation*	cyclin-dependent protein kinase regulator activity					YJL006C	YJL006C||ebi.ac.uk:Database:sgd;A_06_P4027||www.chem.agilent.com:Database:agp		A_06_P4027	1082840	OLIGO	8.043333346	1.88148148	39	11	1	1109			873	227	1	.05443518852	1	1	0	0	0	0	0	0	0	0	0	1178.54	886.111	1	22.09354	22.72527
1110					MRPL51	16	W	729789	730211	protein biosynthesis*	structural constituent of ribosome					YPR100W	YPR100W||ebi.ac.uk:Database:sgd;A_06_P7147||www.chem.agilent.com:Database:agp		A_06_P7147	1085632	OLIGO	8.255000013	1.88148148	40	11	1	1110			894	229	1	.05004852808	1	1	0	0	0	0	0	0	0	0	1	2352.433	2606.958	1	35.7698	22.79182
1111						15	W	83833	85263	biological process unknown	molecular function unknown					YOL125W	YOL125W||ebi.ac.uk:Database:sgd;A_06_P6318||www.chem.agilent.com:Database:agp		A_06_P6318	1084519	OLIGO	8.46666668	1.88148148	41	11	1	1111			914	227	1	.0613727685	1	1	0	0	0	0	0	0	0	0	0	521.4546	783.8239	1	10.72872	22.57678
1112					ELP6	13	W	898404	899225	regulation of transcription from RNA polymerase II promoter	RNA polymerase II transcription elongation factor activity					YMR312W	YMR312W||ebi.ac.uk:Database:sgd;A_06_P5755||www.chem.agilent.com:Database:agp		A_06_P5755	1083416	OLIGO	8.678333347	1.88148148	42	11	1	1112			935	228	1	.06589058841	1	1	0	0	0	0	0	0	0	0	0	453.7112	576.0949	1	10.71835	22.67537
1113						1	C	119542	118565	biological process unknown	molecular function unknown					YAL018C	YAL018C||ebi.ac.uk:Database:sgd;A_06_P1040||www.chem.agilent.com:Database:agp		A_06_P1040	1085733	OLIGO	8.890000014	1.88148148	43	11	1	1113			956	227	1	.6383088865	1	1	0	0	0	0	0	0	0	0	0	39.82264	30.26277	1	6.056882	22.62687
1114						14	W	517248	517841	biological process unknown	molecular function unknown					YNL056W	YNL056W||ebi.ac.uk:Database:sgd;A_06_P5827||www.chem.agilent.com:Database:agp		A_06_P5827	1084989	OLIGO	9.101666681	1.88148148	44	11	1	1114			978	229	1	.05236045688	1	1	0	0	0	0	0	0	0	0	0	1556.461	1203.371	1	27.32309	22.74453
1115					AVT6	5	C	400838	399492	amino acid transport	amino acid transporter activity					YER119C	YER119C||ebi.ac.uk:Database:sgd;A_06_P2751||www.chem.agilent.com:Database:agp		A_06_P2751	1086901	OLIGO	9.313333348	1.88148148	45	11	1	1115			999	227	1	.05022256103	1	1	0	0	0	0	0	0	0	0	1	2107.819	2267.86	1	23.23464	22.56
1116					YCS4	12	C	687204	683674	mitotic sister chromatid segregation*	molecular function unknown					YLR272C	YLR272C||ebi.ac.uk:Database:sgd;A_06_P5087||www.chem.agilent.com:Database:agp		A_06_P5087	1082115	OLIGO	9.525000015	1.88148148	46	11	1	1116			1020	228	1	.05834087495	1	1	0	0	0	0	0	0	0	0	0	854.247	634.0669	1	16.49522	22.94909
1117					SUR4	12	W	867353	868390	sphingolipid biosynthesis*	fatty acid elongase activity					YLR372W	YLR372W||ebi.ac.uk:Database:sgd;A_06_P5190||www.chem.agilent.com:Database:agp		A_06_P5190	1082521	OLIGO	9.736666682	1.88148148	47	11	1	1117			1042	227	1	.04939508042	1	1	0	0	0	0	0	0	0	0	1	9117.774	10517.9	1	123.1569	22.7
1118					JJJ3	10	W	612330	612848	peptidyl-diphthamide biosynthesis from peptidyl-histidine	molecular function unknown					YJR097W	YJR097W||ebi.ac.uk:Database:sgd;A_06_P4340||www.chem.agilent.com:Database:agp		A_06_P4340	1082514	OLIGO	9.948333349	1.88148148	48	11	1	1118			1063	229	1	.1730403808	1	1	0	0	0	0	0	0	0	0	1	106.3235	166.2337	1	7.254411	22.71324
1119					TUB3	13	C	23684	22049	mitotic sister chromatid segregation*	structural constituent of cytoskeleton					YML124C	YML124C||ebi.ac.uk:Database:sgd;A_06_P5418||www.chem.agilent.com:Database:agp		A_06_P5418	1084101	OLIGO	10.160000016	1.88148148	49	11	1	1119			1084	227	1	.04968149335	1	1	0	0	0	0	0	0	0	0	1	3043.073	2999.129	1	44.12359	22.73507
1120						7	C	157602	157279							YGL182C	YGL182C||ebi.ac.uk:Database:sgd;A_06_P3137||www.chem.agilent.com:Database:agp		A_06_P3137	1084979	OLIGO	10.371666683	1.88148148	50	11	1	1120			1105	227	1	.6488412627	1	1	0	0	0	0	0	0	0	0	1	36.7028	31.91529	1	5.59021	22.91304
1121						12	W	924563	925078							YLR402W	YLR402W||ebi.ac.uk:Database:sgd;A_06_P5220||www.chem.agilent.com:Database:agp		A_06_P5220	1081626	OLIGO	10.58333335	1.88148148	51	11	1	1121			1126	227	1	.6840603011	1	1	0	0	0	0	0	0	0	0	0	30.7039	34.32339	1	5.678939	22.69847
1122						8	C	298611	297387	biological process unknown	molecular function unknown					YHR097C	YHR097C||ebi.ac.uk:Database:sgd;A_06_P3672||www.chem.agilent.com:Database:agp		A_06_P3672	1086803	OLIGO	10.795000017	1.88148148	52	11	1	1122			1147	228	1	.07449874032	1	1	0	0	0	0	0	0	0	0	1	371.7128	422.9922	1	8.599533	22.52045
1123					ADK1	4	W	916480	917148	nucleotide metabolism*	adenylate kinase activity					YDR226W	YDR226W||ebi.ac.uk:Database:sgd;A_06_P2215||www.chem.agilent.com:Database:agp		A_06_P2215	1083543	OLIGO	11.006666684	1.88148148	53	11	1	1123			1168	228	1	.04936939029	1	1	0	0	0	0	0	0	0	0	1	20946.03	18078.27	1	212.725	22.67286
1124					ENO2	8	W	451326	452639	glycolysis*	phosphopyruvate hydratase activity					YHR174W	YHR174W||ebi.ac.uk:Database:sgd;A_06_P3752||www.chem.agilent.com:Database:agp		A_06_P3752	1083820	OLIGO	11.218333351	1.88148148	54	11	1	1124			1190	228	1	.04913911289	1	1	0	0	0	0	0	1	0	0	1	218751.3	223227	1	1473.862	22.66543
1125					AI4	17	W	13818	21935	RNA splicing*	endonuclease activity					Q0065	Q0065||ebi.ac.uk:Database:sgd;A_06_P1007||www.chem.agilent.com:Database:agp		A_06_P1007	1083679	OLIGO	11.430000018	1.88148148	55	11	1	1125			1211	227	1	.05223715891	1	1	0	0	0	0	0	0	0	0	0	2131.744	1437.706	1	30.92107	22.49421
1126						12	C	514715	514110	biological process unknown	molecular function unknown					YLR179C	YLR179C||ebi.ac.uk:Database:sgd;A_06_P4993||www.chem.agilent.com:Database:agp		A_06_P4993	1084028	OLIGO	11.641666685	1.88148148	56	11	1	1126			1232	228	1	.04920781056	1	1	0	0	0	0	0	0	0	0	1	36141.46	33294.77	1	494.6516	22.52985
1127					SLX1	2	W	675308	676222	DNA repair*	5'-flap endonuclease activity					YBR228W	YBR228W||ebi.ac.uk:Database:sgd;A_06_P1481||www.chem.agilent.com:Database:agp		A_06_P1481	1085738	OLIGO	11.853333352	1.88148148	57	11	1	1127			1253	227	1	.09559458834	1	1	0	0	0	0	0	0	0	0	0	329.3599	224.009	1	11.97093	22.71685
1128						4	W	222427	223740	biological process unknown	molecular function unknown					YDL133W	YDL133W||ebi.ac.uk:Database:sgd;A_06_P1866||www.chem.agilent.com:Database:agp		A_06_P1866	1086221	OLIGO	12.065000019	1.88148148	58	11	1	1128			1275	228	1	.05159379475	1	1	0	0	0	0	0	0	0	0	0	1956.894	1478.607	1	28.70882	22.77358
1129					SSO2	13	C	627807	626920	vesicle fusion*	t-SNARE activity					YMR183C	YMR183C||ebi.ac.uk:Database:sgd;A_06_P5620||www.chem.agilent.com:Database:agp		A_06_P5620	1081214	OLIGO	12.276666686	1.88148148	59	11	1	1129			1296	227	1	.04974695272	1	1	0	0	0	0	0	0	0	0	1	3298.889	2977.427	1	47.21076	22.22388
1130					SSB2	14	W	252058	253899	protein biosynthesis	ATPase activity*					YNL209W	YNL209W||ebi.ac.uk:Database:sgd;A_06_P5981||www.chem.agilent.com:Database:agp		A_06_P5981	1086682	OLIGO	12.488333353	1.88148148	60	11	1	1130			1317	228	1	.04913765711	1	1	0	0	0	0	0	0	0	0	1	68526.6	69440.15	1	638.9811	22.95367
1131					RHO5	14	C	300649	299654	Rho protein signal transduction	GTPase activity					YNL180C	YNL180C||ebi.ac.uk:Database:sgd;A_06_P5952||www.chem.agilent.com:Database:agp		A_06_P5952	1081575	OLIGO	12.70000002	1.88148148	61	11	1	1131			1337	227	1	.05009325363	1	1	0	0	0	0	0	0	0	0	1	5412.983	4132.922	1	67.81585	23.06786
1132					SAS2	13	C	523344	522328	chromatin silencing at telomere	acetyltransferase activity*					YMR127C	YMR127C||ebi.ac.uk:Database:sgd;A_06_P5558||www.chem.agilent.com:Database:agp		A_06_P5558	1083582	OLIGO	12.911666687	1.88148148	62	11	1	1132			1359	228	1	.07873707065	1	1	0	0	0	0	0	0	0	0	0	418.4293	314.7569	1	12.17011	22.77656
1133					UBX3	4	C	294759	293392	biological process unknown	molecular function unknown					YDL091C	YDL091C||ebi.ac.uk:Database:sgd;A_06_P1821||www.chem.agilent.com:Database:agp		A_06_P1821	1086557	OLIGO	13.123333354	1.88148148	63	11	1	1133			1380	227	1	.05151640427	1	1	0	0	0	0	0	0	0	0	0	2162.451	1584.163	1	33.68968	22.49808
1134					TFA1	11	W	385401	386849	transcription initiation from RNA polymerase II promoter	general RNA polymerase II transcription factor activity					YKL028W	YKL028W||ebi.ac.uk:Database:sgd;A_06_P4436||www.chem.agilent.com:Database:agp		A_06_P4436	1086445	OLIGO	13.335000021	1.88148148	64	11	1	1134			1401	228	1	.05129510108	1	1	0	0	0	0	0	0	0	0	1	1747.762	1480.813	1	29.07031	22.59854
1135						10	W	126521	126742							YJL156W-A	YJL156W-A||ebi.ac.uk:Database:sgd;A_06_P4178||www.chem.agilent.com:Database:agp		A_06_P4178	1085033	OLIGO	13.546666688	1.88148148	65	11	1	1135			1422	227	1	.6676686541	1	1	0	0	0	0	0	0	0	0	1	33.82612	32.74242	1	6.430262	22.52091
1136						9	C	200116	199643	biological process unknown	molecular function unknown					YIL087C	YIL087C||ebi.ac.uk:Database:sgd;A_06_P3886||www.chem.agilent.com:Database:agp		A_06_P3886	1082007	OLIGO	13.758333355	1.88148148	66	11	1	1136			1444	228	1	.05935621748	1	1	0	0	0	0	0	0	0	0	0	615.3756	1231.242	1	14.48437	22.44403
1137						13	C	95369	94431	biological process unknown	molecular function unknown					YML087C	YML087C||ebi.ac.uk:Database:sgd;A_06_P5377||www.chem.agilent.com:Database:agp		A_06_P5377	1085636	OLIGO	13.970000022	1.88148148	67	11	1	1137			1465	227	1	.05349282065	1	1	0	0	0	0	0	0	0	0	1	1000.846	1137.534	1	23.26144	22.83774
1138					NMA1	12	W	784913	786118	NAD metabolism	nicotinamide-nucleotide adenylyltransferase activity					YLR328W	YLR328W||ebi.ac.uk:Database:sgd;A_06_P5145||www.chem.agilent.com:Database:agp		A_06_P5145	1086660	OLIGO	14.181666689	1.88148148	68	11	1	1138			1486	228	1	.05059892316	1	1	0	0	0	0	0	0	0	0	1	1852.925	2158.821	1	27.27798	22.9777
1139					SOM1	5	C	42624	42400	proteolysis and peptidolysis	molecular function unknown					YEL059C-A	YEL059C-A||ebi.ac.uk:Database:sgd;A_06_P2600||www.chem.agilent.com:Database:agp		A_06_P2600	1082092	OLIGO	14.393333356	1.88148148	69	11	1	1139			1507	227	1	.0528106425	1	1	0	0	0	0	0	0	0	0	0	1265.275	1920.715	1	26.26283	22.75655
1140					RPL7A	7	C	365999	364338	protein biosynthesis	structural constituent of ribosome					YGL076C	YGL076C||ebi.ac.uk:Database:sgd;A_06_P3031||www.chem.agilent.com:Database:agp		A_06_P3031	1082524	OLIGO	14.605000023	1.88148148	70	11	1	1140			1528	229	1	.05197348038	1	1	0	0	0	0	0	0	0	0	0	1312.038	1702.976	1	18.37856	22.5963
1141						7	W	828630	828965							YGR164W	YGR164W||ebi.ac.uk:Database:sgd;A_06_P3385||www.chem.agilent.com:Database:agp		A_06_P3385	1082861	OLIGO	14.81666669	1.88148148	71	11	1	1141			1550	227	1	.6582066422	1	1	0	0	0	0	0	0	0	0	0	35.96408	31.65366	1	5.411018	22.82331
1142					DDR2	15	C	231753	231568	response to stress	molecular function unknown					YOL052C-A	YOL052C-A||ebi.ac.uk:Database:sgd;A_06_P6244||www.chem.agilent.com:Database:agp		A_06_P6244	1081749	OLIGO	15.028333357	1.88148148	72	11	1	1142			1570	228	1	.05549771967	1	1	0	0	0	0	0	0	0	0	0	1544.714	3279.433	1	29.33555	22.98905
1143					ISY1	10	W	528611	529318	nuclear mRNA splicing, via spliceosome	RNA splicing factor activity, transesterification mechanism					YJR050W	YJR050W||ebi.ac.uk:Database:sgd;A_06_P4293||www.chem.agilent.com:Database:agp		A_06_P4293	1080736	OLIGO	15.240000024	1.88148148	73	11	1	1143			1592	227	1	.07654606201	1	1	0	0	0	0	0	0	0	0	0	444.2364	327.3267	1	11.24251	22.63971
1144					SNG1	7	C	894145	892502	response to drug	molecular function unknown					YGR197C	YGR197C||ebi.ac.uk:Database:sgd;A_06_P3418||www.chem.agilent.com:Database:agp		A_06_P3418	1081722	OLIGO	15.451666691	1.88148148	74	11	1	1144			1613	228	1	.06493503776	1	1	0	0	0	0	0	0	0	0	1	476.9226	582.41	1	11.75967	22.37778
1145					RSC8	6	C	229173	227500	chromatin remodeling	molecular function unknown					YFR037C	YFR037C||ebi.ac.uk:Database:sgd;A_06_P2935||www.chem.agilent.com:Database:agp		A_06_P2935	1083708	OLIGO	15.663333358	1.88148148	75	11	1	1145			1634	228	1	.05024732971	1	1	0	0	0	0	0	0	0	0	1	5255.233	3917.541	1	84.7053	22.77122
1146					NAT1	4	C	381435	378871	protein amino acid acetylation	peptide alpha-N-acetyltransferase activity					YDL040C	YDL040C||ebi.ac.uk:Database:sgd;A_06_P1768||www.chem.agilent.com:Database:agp		A_06_P1768	1084358	OLIGO	15.875000025	1.88148148	76	11	1	1146			1655	228	1	.05208451771	1	1	0	0	0	0	0	0	0	0	1	1251.017	1332.039	1	16.81595	22.22878
1147						16	C	44344	43283	biological process unknown	molecular function unknown					YPL264C	YPL264C||ebi.ac.uk:Database:sgd;A_06_P7025||www.chem.agilent.com:Database:agp		A_06_P7025	1086558	OLIGO	16.086666692	1.88148148	77	11	1	1147			1676	227	1	.06445706269	1	1	0	0	0	0	0	0	0	0	0	441.1586	740.7727	1	9.595191	23.07971
1148						4	C	494264	492552	biological process unknown	DNA binding					YDR026C	YDR026C||ebi.ac.uk:Database:sgd;A_06_P2011||www.chem.agilent.com:Database:agp		A_06_P2011	1086243	OLIGO	16.298333359	1.88148148	78	11	1	1148			1698	228	1	.05693626468	1	1	0	0	0	0	0	0	0	0	0	1406.927	760.2154	1	20.87274	22.60674
1149					HST4	4	W	842332	843444	chromatin silencing at telomere*	DNA binding					YDR191W	YDR191W||ebi.ac.uk:Database:sgd;A_06_P2180||www.chem.agilent.com:Database:agp		A_06_P2180	1086582	OLIGO	16.510000026	1.88148148	79	11	1	1149			1719	227	1	.07019974783	1	1	0	0	0	0	0	0	0	0	1	415.6619	472.4593	1	10.93382	22.5037
1150					GPI2	16	W	410440	411282	GPI anchor biosynthesis	UDP-glycosyltransferase activity					YPL076W	YPL076W||ebi.ac.uk:Database:sgd;A_06_P6835||www.chem.agilent.com:Database:agp		A_06_P6835	1080809	OLIGO	16.721666693	1.88148148	80	11	1	1150			1740	228	1	.1727641404	1	1	0	0	0	0	0	0	0	0	1	128.448	139.324	1	7.342004	22.44195
1151					COX20	4	C	926904	926287	aerobic respiration*	unfolded protein binding					YDR231C	YDR231C||ebi.ac.uk:Database:sgd;A_06_P2220||www.chem.agilent.com:Database:agp		A_06_P2220	1082062	OLIGO	16.93333336	1.88148148	81	11	1	1151			1760	227	1	.05112652814	1	1	0	0	0	0	0	0	0	0	0	2731.054	1965.331	1	45.56885	23.03226
1152					SRB8	3	W	254367	258650	negative regulation of transcription from RNA polymerase II promoter	RNA polymerase II transcription mediator activity					YCR081W	YCR081W||ebi.ac.uk:Database:sgd;A_06_P1700||www.chem.agilent.com:Database:agp		A_06_P1700	1081369	OLIGO	17.145000027	1.88148148	82	11	1	1152			1782	229	1	.08271930699	1	1	0	0	0	0	0	0	0	0	1	308.7231	360.4702	1	9.666886	22.84838
1153					ATP11	14	C	44279	43323	protein complex assembly	unfolded protein binding					YNL315C	YNL315C||ebi.ac.uk:Database:sgd;A_06_P6087||www.chem.agilent.com:Database:agp		A_06_P6087	1084138	OLIGO	17.356666694	1.88148148	83	11	1	1153			1803	227	1	.05051157026	1	1	0	0	0	0	0	0	0	0	1	1887.764	1896.551	1	23.13834	22.73063
1154					URA3	5	W	116167	116970	'de novo' pyrimidine base biosynthesis*	orotidine-5'-phosphate decarboxylase activity					YEL021W	YEL021W||ebi.ac.uk:Database:sgd;A_06_P2562||www.chem.agilent.com:Database:agp		A_06_P2562	1085994	OLIGO	17.568333361	1.88148148	84	11	1	1154			1825	229	1	.04951841814	1	1	0	0	0	0	0	0	0	0	1	3590.769	3696.644	1	46.37473	22.84644
1155					FUM1	16	W	47336	48802	tricarboxylic acid cycle*	fumarate hydratase activity					YPL262W	YPL262W||ebi.ac.uk:Database:sgd;A_06_P7023||www.chem.agilent.com:Database:agp		A_06_P7023	1084220	OLIGO	17.780000028	1.88148148	85	11	1	1155			1846	227	1	.05013716398	1	1	0	0	0	0	0	0	0	0	1	7637.886	10356.38	1	91.01539	22.66288
1156						7	W	312196	312843	biological process unknown	molecular function unknown					YGL101W	YGL101W||ebi.ac.uk:Database:sgd;A_06_P3056||www.chem.agilent.com:Database:agp		A_06_P3056	1086130	OLIGO	17.991666695	1.88148148	86	11	1	1156			1867	228	1	.05658646127	1	1	0	0	0	0	0	0	0	0	0	1599.326	831.9059	1	29.22585	22.62182
1157					BIK1	3	C	69921	68599	mitotic spindle organization and biogenesis in nucleus*	microtubule binding					YCL029C	YCL029C||ebi.ac.uk:Database:sgd;A_06_P1581||www.chem.agilent.com:Database:agp		A_06_P1581	1084327	OLIGO	18.203333362	1.88148148	87	11	1	1157			1888	228	1	.12167966	1	1	0	0	0	0	0	0	0	0	1	215.7605	183.6698	1	9.127465	22.48881
1158					FAA1	15	W	909338	911440	lipid metabolism*	long-chain-fatty-acid-CoA ligase activity					YOR317W	YOR317W||ebi.ac.uk:Database:sgd;A_06_P6681||www.chem.agilent.com:Database:agp		A_06_P6681	1084753	OLIGO	18.415000029	1.88148148	88	11	1	1158			1909	229	1	.05118130905	1	1	0	0	0	0	0	0	0	0	0	4104.169	2747.306	1	53.38626	22.75
1159					GLO2	4	W	1009004	1009828	carbohydrate metabolism*	hydroxyacylglutathione hydrolase activity					YDR272W	YDR272W||ebi.ac.uk:Database:sgd;A_06_P2261||www.chem.agilent.com:Database:agp		A_06_P2261	1086117	OLIGO	18.626666696	1.88148148	89	11	1	1159			1930	228	1	.05071200272	1	1	0	0	0	0	0	0	0	0	0	3208.655	2366.567	1	41.39445	22.44151
1160						15	C	479638	479297							YOR082C	YOR082C||ebi.ac.uk:Database:sgd;A_06_P6444||www.chem.agilent.com:Database:agp		A_06_P6444	1080858	OLIGO	18.838333363	1.88148148	90	11	1	1160			1952	229	1	.6744183905	1	1	0	0	0	0	0	0	0	0	1	36.72136	29.44281	1	6.171379	23.01521
1161						13	C	473263	472901							YMR103C	YMR103C||ebi.ac.uk:Database:sgd;A_06_P5532||www.chem.agilent.com:Database:agp		A_06_P5532	1086765	OLIGO	19.05000003	1.88148148	91	11	1	1161			1973	228	1	.0566069404	1	1	0	0	0	0	0	0	0	0	0	717.1597	1040.908	1	11.48828	22.26838
1162					RPB4	10	W	150879	151544	mRNA-nucleus export*	DNA-directed RNA polymerase activity					YJL140W	YJL140W||ebi.ac.uk:Database:sgd;A_06_P4161||www.chem.agilent.com:Database:agp		A_06_P4161	1086714	OLIGO	19.261666697	1.88148148	92	11	1	1162			1994	229	1	.05123781219	1	1	0	0	0	0	0	0	0	0	0	4747.275	3116.893	1	70.45614	22.67883
1163					AMD1	13	C	208860	206428	purine nucleotide metabolism	AMP deaminase activity					YML035C	YML035C||ebi.ac.uk:Database:sgd;A_06_P5324||www.chem.agilent.com:Database:agp		A_06_P5324	1086613	OLIGO	19.473333364	1.88148148	93	11	1	1163			2015	228	1	.05066496892	1	1	0	0	0	0	0	0	0	0	0	2089.616	2700.212	1	42.27913	22.38007
1164					DPH1	9	W	171748	173025	peptidyl-diphthamide biosynthesis from peptidyl-histidine	molecular function unknown					YIL103W	YIL103W||ebi.ac.uk:Database:sgd;A_06_P3902||www.chem.agilent.com:Database:agp		A_06_P3902	1080926	OLIGO	19.685000031	1.88148148	94	11	1	1164			2036	229	1	.05956101269	1	1	0	0	0	0	0	0	0	0	1	670.5196	646.9362	1	15.15845	22.57088
1165					VMA8	5	W	58378	59148	vacuolar acidification	hydrogen-transporting ATPase activity, rotational mechanism					YEL051W	YEL051W||ebi.ac.uk:Database:sgd;A_06_P2592||www.chem.agilent.com:Database:agp		A_06_P2592	1086671	OLIGO	19.896666698	1.88148148	95	11	1	1165			2057	227	1	.05229902026	1	1	0	0	0	0	0	0	0	0	1	15814.92	9024.323	1	236.9463	22.33704
1166					RDS3	16	W	720635	720958	nuclear mRNA splicing, via spliceosome*	transcription factor activity					YPR094W	YPR094W||ebi.ac.uk:Database:sgd;A_06_P7141||www.chem.agilent.com:Database:agp		A_06_P7141	1082004	OLIGO	20.108333365	1.88148148	96	11	1	1166			2078	228	1	.3715383858	1	1	0	0	0	0	0	0	0	0	1	41.83335	83.48933	1	7.227102	22.28782
1167						2	W	127302	127613							YBL048W	YBL048W||ebi.ac.uk:Database:sgd;A_06_P1178||www.chem.agilent.com:Database:agp		A_06_P1178	1080938	OLIGO	20.320000032	1.88148148	97	11	1	1167			2100	227	1	.05781342773	1	1	0	0	0	0	0	0	0	0	0	677.8378	1225.411	1	13.73772	22.43561
1168					TSC11	5	C	347608	343316	cell wall organization and biogenesis*	protein binding					YER093C	YER093C||ebi.ac.uk:Database:sgd;A_06_P2725||www.chem.agilent.com:Database:agp		A_06_P2725	1085853	OLIGO	20.531666699	1.88148148	98	11	1	1168			2121	228	1	.06419635306	1	1	0	0	0	0	0	0	0	0	1	557.7224	517.3342	1	14.6196	22.84074
1169					LEM3	14	W	31943	33187	cell surface receptor linked signal transduction	transcription regulator activity					YNL323W	YNL323W||ebi.ac.uk:Database:sgd;A_06_P6095||www.chem.agilent.com:Database:agp		A_06_P6095	1083170	OLIGO	20.743333366	1.88148148	99	11	1	1169			2143	227	1	.04969436364	1	1	0	0	0	0	0	0	0	0	1	2965.819	3092.922	1	46.38873	22.81509
1170					RPL24A	7	C	437939	437472	protein biosynthesis	structural constituent of ribosome*					YGL031C	YGL031C||ebi.ac.uk:Database:sgd;A_06_P2986||www.chem.agilent.com:Database:agp		A_06_P2986	1081339	OLIGO	20.955000033	1.88148148	100	11	1	1170			2163	229	1	.05038475865	1	1	0	0	0	0	0	0	0	0	1	3489.551	4743.98	1	50.03256	22.78626
1171						3	C	63282	62776	response to oxidative stress	protein-methionine-R-oxide reductase activity					YCL033C	YCL033C||ebi.ac.uk:Database:sgd;A_06_P1585||www.chem.agilent.com:Database:agp		A_06_P1585	1085092	OLIGO	21.1666667	1.88148148	101	11	1	1171			2184	228	1	.05390245384	1	1	0	0	0	0	0	0	0	0	0	1038.481	1633.048	1	18.7792	23.0188
1172					HXT5	8	C	296449	294671	hexose transport	glucose transporter activity*					YHR096C	YHR096C||ebi.ac.uk:Database:sgd;A_06_P3671||www.chem.agilent.com:Database:agp		A_06_P3671	1082169	OLIGO	21.378333367	1.88148148	102	11	1	1172			2205	229	1	.05290618478	1	1	0	0	0	0	0	0	0	0	1	1174.556	1098.823	1	21.46837	22.91209
1173					GDH1	15	C	1043038	1041674	glutamate biosynthesis	glutamate dehydrogenase (NADP+) activity					YOR375C	YOR375C||ebi.ac.uk:Database:sgd;A_06_P6739||www.chem.agilent.com:Database:agp		A_06_P6739	1083445	OLIGO	21.590000034	1.88148148	103	11	1	1173			2227	227	1	.07256783595	1	1	0	0	0	0	0	0	0	0	0	20172.22	3828.872	1	263.2406	22.91791
1174					GAL80	13	W	171594	172901	regulation of transcription, DNA-dependent*	transcription corepressor activity					YML051W	YML051W||ebi.ac.uk:Database:sgd;A_06_P5338||www.chem.agilent.com:Database:agp		A_06_P5338	1085250	OLIGO	21.801666701	1.88148148	104	11	1	1174			2248	229	1	.05308636381	1	1	0	0	0	0	0	0	0	0	1	1071.746	1147.168	1	16.5457	22.83582
1175						15	C	343081	342857	biological process unknown	molecular function unknown					YOR008C-A	YOR008C-A||ebi.ac.uk:Database:sgd;A_06_P6369||www.chem.agilent.com:Database:agp		A_06_P6369	1084768	OLIGO	22.013333368	1.88148148	105	11	1	1175			2269	228	1	.6399538679	1	1	0	0	0	0	0	0	0	0	1	38.63805	31.10039	1	6.094544	23.09091
1176						13	W	173139	174074	biological process unknown	molecular function unknown					YML050W	YML050W||ebi.ac.uk:Database:sgd;A_06_P5337||www.chem.agilent.com:Database:agp		A_06_P5337	1081142	OLIGO	22.225000035	1.88148148	106	11	1	1176			2290	228	1	.1309540315	1	1	0	0	0	0	0	0	0	0	1	212.2485	156.8163	1	9.3481	22.69804
1177					ECM19	12	W	903066	903404	cell wall organization and biogenesis	molecular function unknown					YLR390W	YLR390W||ebi.ac.uk:Database:sgd;A_06_P5208||www.chem.agilent.com:Database:agp		A_06_P5208	1086203	OLIGO	22.436666702	1.88148148	107	11	1	1177			2311	228	1	.1123534264	1	1	0	0	0	0	0	0	0	0	1	187.7472	256.6115	1	8.722764	21.41445
1178					COF1	12	C	40413	39803	actin filament organization*	protein binding					YLL050C	YLL050C||ebi.ac.uk:Database:sgd;A_06_P4795||www.chem.agilent.com:Database:agp		A_06_P4795	1086091	OLIGO	0	2.069629628	1	12	1	1178			67	246	1	.04935637576	1	1	0	0	0	0	0	0	0	0	1	6994.856	7832.406	1	104.1087	21.74265
1179						4	C	1410084	1407454	biological process unknown	molecular function unknown					YDR475C	YDR475C||ebi.ac.uk:Database:sgd;A_06_P2468||www.chem.agilent.com:Database:agp		A_06_P2468	1085811	OLIGO	.211666667	2.069629628	2	12	1	1179			88	247	1	.2708740854	1	1	0	0	0	0	0	1	0	0	1	83.89877	82.48878	1	6.934134	22.06792
1180					RPN9	4	W	1322195	1323376	ubiquitin-dependent protein catabolism	structural molecule activity					YDR427W	YDR427W||ebi.ac.uk:Database:sgd;A_06_P2420||www.chem.agilent.com:Database:agp		A_06_P2420	1081500	OLIGO	.423333334	2.069629628	3	12	1	1180			110	246	1	.05029431739	1	1	0	0	0	0	0	1	0	0	1	2056.887	2071.881	1	33.45061	22.08712
1181					YAK1	10	C	150308	147885	protein amino acid phosphorylation	protein kinase activity					YJL141C	YJL141C||ebi.ac.uk:Database:sgd;A_06_P4162||www.chem.agilent.com:Database:agp		A_06_P4162	1085013	OLIGO	.635000001	2.069629628	4	12	1	1181			131	247	1	.1287868776	1	1	0	0	0	0	0	1	0	0	1	195.2843	177.4277	1	8.27175	22.34296
1182					YNK1	11	W	314457	314918	purine nucleotide biosynthesis*	nucleoside diphosphate kinase activity					YKL067W	YKL067W||ebi.ac.uk:Database:sgd;A_06_P4477||www.chem.agilent.com:Database:agp		A_06_P4477	1080773	OLIGO	.846666668	2.069629628	5	12	1	1182			153	246	1	.04958024042	1	1	0	0	0	0	0	0	0	0	1	7215.409	8722.112	1	101.5915	22.36131
1183					RRP8	4	W	612069	613220	rRNA processing	methyltransferase activity					YDR083W	YDR083W||ebi.ac.uk:Database:sgd;A_06_P2071||www.chem.agilent.com:Database:agp		A_06_P2071	1083758	OLIGO	1.058333335	2.069629628	6	12	1	1183			174	247	1	.05690584814	1	1	0	0	0	0	0	0	0	0	0	872.7623	715.2054	1	17.65016	22.15162
1184					DBP10	4	W	394214	397201	35S primary transcript processing*	ATP-dependent RNA helicase activity					YDL031W	YDL031W||ebi.ac.uk:Database:sgd;A_06_P1759||www.chem.agilent.com:Database:agp		A_06_P1759	1084770	OLIGO	1.270000002	2.069629628	7	12	1	1184			195	246	1	.05761244447	1	1	0	0	0	0	0	0	0	0	0	874.7376	669.798	1	17.71567	22.01845
1185					MSC6	15	C	1003220	1001142	meiotic recombination	molecular function unknown					YOR354C	YOR354C||ebi.ac.uk:Database:sgd;A_06_P6718||www.chem.agilent.com:Database:agp		A_06_P6718	1081686	OLIGO	1.481666669	2.069629628	8	12	1	1185			216	247	1	.05272620505	1	1	0	0	0	0	0	0	0	0	1	1192.59	1133.463	1	25.48094	22.19134
1186						14	C	398370	398023	biological process unknown	molecular function unknown					YNL122C	YNL122C||ebi.ac.uk:Database:sgd;A_06_P5893||www.chem.agilent.com:Database:agp		A_06_P5893	1081303	OLIGO	1.693333336	2.069629628	9	12	1	1186			237	246	1	.0515703105	1	1	0	0	0	0	0	0	0	0	1	1395.599	1440.517	1	23.75941	22.26259
1187					YAT2	5	W	202191	204962	alcohol metabolism*	carnitine O-acetyltransferase activity					YER024W	YER024W||ebi.ac.uk:Database:sgd;A_06_P2648||www.chem.agilent.com:Database:agp		A_06_P2648	1084100	OLIGO	1.905000003	2.069629628	10	12	1	1187			259	247	1	.05113161234	1	1	0	0	0	0	0	0	0	0	0	1604.001	1991.144	1	25.77162	22.29889
1188					PXR1	7	C	1051731	1050916	35S primary transcript processing*	RNA binding					YGR280C	YGR280C||ebi.ac.uk:Database:sgd;A_06_P3502||www.chem.agilent.com:Database:agp		A_06_P3502	1083739	OLIGO	2.11666667	2.069629628	11	12	1	1188			280	246	1	.05491450723	1	1	0	0	0	0	0	0	0	0	1	969.6509	861.3926	1	18.99195	22.21612
1189					SYG1	9	C	267822	265114	signal transduction	molecular function unknown					YIL047C	YIL047C||ebi.ac.uk:Database:sgd;A_06_P3847||www.chem.agilent.com:Database:agp		A_06_P3847	1085914	OLIGO	2.328333337	2.069629628	12	12	1	1189			301	247	1	.05031810089	1	1	0	0	0	0	0	0	0	0	1	2985.428	3930.109	1	46.66123	22.00749
1190						16	W	944599	947697	biological process unknown	DNA helicase activity					YPR204W	YPR204W||ebi.ac.uk:Database:sgd;A_06_P7252||www.chem.agilent.com:Database:agp		A_06_P7252	1084895	OLIGO	2.540000004	2.069629628	13	12	1	1190			322	246	1	.04925343901	1	1	0	0	0	0	0	0	0	0	1	19495.76	17624.51	1	219.0178	22.39777
1191						16	W	943876	944184	biological process unknown	molecular function unknown					YPR203W	YPR203W||ebi.ac.uk:Database:sgd;A_06_P7251||www.chem.agilent.com:Database:agp		A_06_P7251	1085078	OLIGO	2.751666671	2.069629628	14	12	1	1191			343	247	1	.07528189836	1	1	0	0	0	0	0	0	0	0	0	344.6663	444.5395	1	9.497251	22.43382
1192						16	W	943028	943892	biological process unknown	molecular function unknown					YPR202W	YPR202W||ebi.ac.uk:Database:sgd;A_06_P7250||www.chem.agilent.com:Database:agp		A_06_P7250	1083228	OLIGO	2.963333338	2.069629628	15	12	1	1192			364	246	1	.1607088613	1	1	0	0	0	0	0	0	0	0	1	122.3571	170.6653	1	7.510783	22.01838
1193					ARR3	16	W	939918	941132	arsenite transport	arsenite transporter activity					YPR201W	YPR201W||ebi.ac.uk:Database:sgd;A_06_P7249||www.chem.agilent.com:Database:agp		A_06_P7249	1086018	OLIGO	3.175000005	2.069629628	16	12	1	1193			385	246	1	.6728210216	1	1	0	0	0	0	0	0	0	0	0	35.73102	30.46106	1	6.211693	22.25641
1194					ARR2	16	C	939667	939275	response to arsenic	arsenate reductase activity					YPR200C	YPR200C||ebi.ac.uk:Database:sgd;A_06_P7248||www.chem.agilent.com:Database:agp		A_06_P7248	1081927	OLIGO	3.386666672	2.069629628	17	12	1	1194			406	246	1	.266790955	1	1	0	0	0	0	0	0	0	0	1	80.97535	88.15354	1	5.95016	22.25
1195					ARR1	16	C	939028	938144	positive regulation of transcription from RNA polymerase II promoter*	RNA polymerase II transcription factor activity					YPR199C	YPR199C||ebi.ac.uk:Database:sgd;A_06_P7247||www.chem.agilent.com:Database:agp		A_06_P7247	1084250	OLIGO	3.598333339	2.069629628	18	12	1	1195			428	247	1	.05205408107	1	1	0	0	0	0	0	0	0	0	0	1884.333	1362.646	1	34.56761	22.40449
1196					SGE1	16	W	934030	935661	response to drug*	xenobiotic-transporting ATPase activity					YPR198W	YPR198W||ebi.ac.uk:Database:sgd;A_06_P7246||www.chem.agilent.com:Database:agp		A_06_P7246	1084730	OLIGO	3.810000006	2.069629628	19	12	1	1196			449	246	1	.05810053955	1	1	0	0	0	0	0	0	0	0	0	834.295	651.0366	1	16.859	22.1673
1197						16	C	934457	933894							YPR197C	YPR197C||ebi.ac.uk:Database:sgd;A_06_P7245||www.chem.agilent.com:Database:agp		A_06_P7245	1082518	OLIGO	4.021666673	2.069629628	20	12	1	1197			470	247	1	.7085041998	0	0	0	0	0	0	0	0	0	0	0	32.16424	30.55671	1	6.337764	22.681
1198						16	W	931372	932784	biological process unknown	molecular function unknown					YPR196W	YPR196W||ebi.ac.uk:Database:sgd;A_06_P7244||www.chem.agilent.com:Database:agp		A_06_P7244	1086839	OLIGO	4.23333334	2.069629628	21	12	1	1198			491	246	1	.2354263088	1	1	0	0	0	0	0	0	0	0	1	92.42603	100.1888	1	7.808694	22.05166
1199						16	C	928290	927961							YPR195C	YPR195C||ebi.ac.uk:Database:sgd;A_06_P7243||www.chem.agilent.com:Database:agp		A_06_P7243	1085014	OLIGO	4.445000007	2.069629628	22	12	1	1199			510	247	1	.6668309678	1	1	0	0	0	0	0	0	0	0	0	37.72966	29.27866	1	5.480119	22.26894
1200					OPT2	16	C	926933	924300	oligopeptide transport	oligopeptide transporter activity					YPR194C	YPR194C||ebi.ac.uk:Database:sgd;A_06_P7242||www.chem.agilent.com:Database:agp		A_06_P7242	1081590	OLIGO	4.656666674	2.069629628	23	12	1	1200			534	246	1	.5062624812	1	1	0	0	0	0	0	0	0	0	1	56.87263	33.24355	1	7.456018	21.94697
1201					HPA2	16	C	923375	922905	histone acetylation	histone acetyltransferase activity					YPR193C	YPR193C||ebi.ac.uk:Database:sgd;A_06_P7241||www.chem.agilent.com:Database:agp		A_06_P7241	1085882	OLIGO	4.868333341	2.069629628	24	12	1	1201			554	247	1	.1929686329	1	1	0	0	0	0	0	0	0	0	0	160.9885	85.74713	1	7.32863	22.67399
1202					AQY1	16	W	921856	922773	sporulation (sensu Fungi)*	water channel activity					YPR192W	YPR192W||ebi.ac.uk:Database:sgd;A_06_P7240||www.chem.agilent.com:Database:agp		A_06_P7240	1081270	OLIGO	5.080000008	2.069629628	25	12	1	1202			576	246	1	.1669325254	1	1	0	0	0	0	0	0	0	0	1	147.1937	131.0058	1	6.441171	22.50958
1203					QCR2	16	W	919377	920483	aerobic respiration*	ubiquinol-cytochrome-c reductase activity					YPR191W	YPR191W||ebi.ac.uk:Database:sgd;A_06_P7239||www.chem.agilent.com:Database:agp		A_06_P7239	1083465	OLIGO	5.291666675	2.069629628	26	12	1	1203			597	247	1	.04948085316	1	1	0	0	0	0	0	1	0	0	1	6548.65	7650.737	1	69.78826	22.08171
1204					RPC82	16	C	919037	917073	transcription from RNA polymerase III promoter	DNA-directed RNA polymerase activity					YPR190C	YPR190C||ebi.ac.uk:Database:sgd;A_06_P7238||www.chem.agilent.com:Database:agp		A_06_P7238	1082173	OLIGO	5.503333342	2.069629628	27	12	1	1204			618	246	1	.05791780137	1	1	0	0	0	0	0	0	0	0	1	735.4999	710.9448	1	14.94181	22.31868
1205					SKI3	16	W	912660	916958	mRNA catabolism*	translation repressor activity					YPR189W	YPR189W||ebi.ac.uk:Database:sgd;A_06_P7237||www.chem.agilent.com:Database:agp		A_06_P7237	1081518	OLIGO	5.715000009	2.069629628	28	12	1	1205			639	247	1	.05527520916	1	1	0	0	0	0	0	0	0	0	0	981.2239	820.0166	1	18.30464	22.75093
1206					MLC2	16	C	912475	911984	cytokinesis, contractile ring contraction	myosin II binding					YPR188C	YPR188C||ebi.ac.uk:Database:sgd;A_06_P7236||www.chem.agilent.com:Database:agp		A_06_P7236	1084493	OLIGO	5.926666676	2.069629628	29	12	1	1206			660	246	1	.05033224307	1	1	0	0	0	0	0	0	0	0	1	2214.352	2679.528	1	42.77463	22.50182
1207					RPO26	16	W	911253	911796	transcription from RNA polymerase II promoter*	DNA-directed RNA polymerase activity					YPR187W	YPR187W||ebi.ac.uk:Database:sgd;A_06_P7235||www.chem.agilent.com:Database:agp		A_06_P7235	1082871	OLIGO	6.138333343	2.069629628	30	12	1	1207			682	247	1	.05006289394	1	1	0	0	0	0	0	0	0	0	1	11929.37	8884.091	1	140.0526	22.83516
1208					PZF1	16	C	911018	909729	transcription initiation from RNA polymerase III promoter	RNA polymerase III transcription factor activity					YPR186C	YPR186C||ebi.ac.uk:Database:sgd;A_06_P7234||www.chem.agilent.com:Database:agp		A_06_P7234	1083207	OLIGO	6.35000001	2.069629628	31	12	1	1208			703	246	1	.05818071395	1	1	0	0	0	0	0	0	0	0	0	807.374	654.2637	1	18.6089	22.65201
1209					ATG13	16	W	907214	909430	protein-vacuolar targeting*	protein binding					YPR185W	YPR185W||ebi.ac.uk:Database:sgd;A_06_P7233||www.chem.agilent.com:Database:agp		A_06_P7233	1084818	OLIGO	6.561666677	2.069629628	32	12	1	1209			724	247	1	.05856640738	1	1	0	0	0	0	0	0	0	0	0	824.5603	628.6048	1	16.64852	22.7234
1210					GDB1	16	W	902040	906650	glycogen catabolism	4-alpha-glucanotransferase activity*					YPR184W	YPR184W||ebi.ac.uk:Database:sgd;A_06_P7232||www.chem.agilent.com:Database:agp		A_06_P7232	1083458	OLIGO	6.773333344	2.069629628	33	12	1	1210			745	246	1	.05042298702	1	1	0	0	0	0	0	0	0	0	1	1929.549	2011.62	1	28.64268	22.74545
1211					DPM1	16	W	900751	901554	protein amino acid N-linked glycosylation*	transferase activity, transferring glycosyl groups*					YPR183W	YPR183W||ebi.ac.uk:Database:sgd;A_06_P7231||www.chem.agilent.com:Database:agp		A_06_P7231	1080722	OLIGO	6.985000011	2.069629628	34	12	1	1211			766	247	1	.05393201567	1	1	0	0	0	0	0	0	0	0	0	5442.175	10891.24	1	74.98645	22.63333
1212					SMX3	16	W	900190	900450	nuclear mRNA splicing, via spliceosome	RNA splicing factor activity, transesterification mechanism					YPR182W	YPR182W||ebi.ac.uk:Database:sgd;A_06_P7230||www.chem.agilent.com:Database:agp		A_06_P7230	1086255	OLIGO	7.196666678	2.069629628	35	12	1	1212			787	246	1	.05530828369	1	1	0	0	0	0	0	0	0	0	0	839.3296	1326.919	1	13.59862	22.46269
1213					SEC23	16	C	899663	897357	ER to Golgi transport*	GTPase activator activity					YPR181C	YPR181C||ebi.ac.uk:Database:sgd;A_06_P7229||www.chem.agilent.com:Database:agp		A_06_P7229	1082351	OLIGO	7.408333345	2.069629628	36	12	1	1213			809	247	1	.0495047426	1	1	0	0	0	0	0	0	0	0	1	4918.434	5639.11	1	47.04744	22.425
1214					AOS1	16	W	895957	897000	protein sumoylation	SUMO activating enzyme activity					YPR180W	YPR180W||ebi.ac.uk:Database:sgd;A_06_P7228||www.chem.agilent.com:Database:agp		A_06_P7228	1081108	OLIGO	7.620000012	2.069629628	37	12	1	1214			830	246	1	.05793368448	1	1	0	0	0	0	0	0	0	0	0	816.6521	665.7768	1	12.09971	22.61567
1215					HDA3	16	C	895760	893793	regulation of transcription, DNA-dependent*	histone deacetylase activity					YPR179C	YPR179C||ebi.ac.uk:Database:sgd;A_06_P7227||www.chem.agilent.com:Database:agp		A_06_P7227	1086427	OLIGO	7.831666679	2.069629628	38	12	1	1215			851	247	1	.05582013338	1	1	0	0	0	0	0	1	0	0	0	1083.973	769.2613	1	19.72103	22.603
1216					PRP4	16	W	892328	893725	nuclear mRNA splicing, via spliceosome	RNA splicing factor activity, transesterification mechanism					YPR178W	YPR178W||ebi.ac.uk:Database:sgd;A_06_P7226||www.chem.agilent.com:Database:agp		A_06_P7226	1084456	OLIGO	8.043333346	2.069629628	39	12	1	1216			873	246	1	.05164804761	1	1	0	0	0	0	0	0	0	0	1	1375.917	1413.023	1	25.09569	22.82156
1217						16	C	892680	892309							YPR177C	YPR177C||ebi.ac.uk:Database:sgd;A_06_P7225||www.chem.agilent.com:Database:agp		A_06_P7225	1084635	OLIGO	8.255000013	2.069629628	40	12	1	1217			893	247	1	.6581320727	0	0	0	0	0	0	0	0	0	0	0	33.23617	34.30198	1	4.547035	23.13971
1218					BET2	16	C	892074	891097	protein amino acid geranylgeranylation	Rab-protein geranylgeranyltransferase activity					YPR176C	YPR176C||ebi.ac.uk:Database:sgd;A_06_P7224||www.chem.agilent.com:Database:agp		A_06_P7224	1085661	OLIGO	8.46666668	2.069629628	41	12	1	1218			914	246	1	.0518090376	1	1	0	0	0	0	0	0	0	0	0	1412.626	1899.327	1	25.05881	22.66016
1219					DPB2	16	W	888970	891039	nucleotide-excision repair*	epsilon DNA polymerase activity					YPR175W	YPR175W||ebi.ac.uk:Database:sgd;A_06_P7223||www.chem.agilent.com:Database:agp		A_06_P7223	1081597	OLIGO	8.678333347	2.069629628	42	12	1	1219			935	247	1	.07157627527	1	1	0	0	0	0	0	0	0	0	1	404.9511	449.0592	1	10.9976	22.18015
1220						16	C	888704	888039	biological process unknown	molecular function unknown					YPR174C	YPR174C||ebi.ac.uk:Database:sgd;A_06_P7222||www.chem.agilent.com:Database:agp		A_06_P7222	1082380	OLIGO	8.890000014	2.069629628	43	12	1	1220			957	246	1	.05537420537	1	1	0	0	0	0	0	0	0	0	0	802.0343	1088.004	1	13.34219	22.66279
1221					VPS4	16	C	887833	886520	protein retention in Golgi*	ATPase activity					YPR173C	YPR173C||ebi.ac.uk:Database:sgd;A_06_P7221||www.chem.agilent.com:Database:agp		A_06_P7221	1082710	OLIGO	9.101666681	2.069629628	44	12	1	1221			978	247	1	.05056069425	1	1	0	0	0	0	0	0	0	0	1	6958.936	4873.341	1	81.19748	22.34109
1222						16	W	885792	886394	biological process unknown	molecular function unknown					YPR172W	YPR172W||ebi.ac.uk:Database:sgd;A_06_P7220||www.chem.agilent.com:Database:agp		A_06_P7220	1083249	OLIGO	9.313333348	2.069629628	45	12	1	1222			999	247	1	.05250005337	1	1	0	0	0	0	0	0	0	0	0	1164.745	1485.757	1	21.04685	22.33333
1223					BSP1	16	W	883824	885554	actin cytoskeleton organization and biogenesis*	protein binding, bridging					YPR171W	YPR171W||ebi.ac.uk:Database:sgd;A_06_P7219||www.chem.agilent.com:Database:agp		A_06_P7219	1085167	OLIGO	9.525000015	2.069629628	46	12	1	1223			1020	248	1	.0539628564	1	1	0	0	0	0	0	0	0	0	0	1139.827	936.137	1	17.46589	22.97436
1224						16	C	883314	882979							YPR170C	YPR170C||ebi.ac.uk:Database:sgd;A_06_P7218||www.chem.agilent.com:Database:agp		A_06_P7218	1085764	OLIGO	9.736666682	2.069629628	47	12	1	1224			1042	246	1	.3123432081	1	1	0	0	0	0	0	0	0	0	1	59.2756	86.1953	1	6.832987	22.55882
1225						16	W	878620	880164	protein monoubiquitination	molecular function unknown					YPR169W	YPR169W||ebi.ac.uk:Database:sgd;A_06_P7217||www.chem.agilent.com:Database:agp		A_06_P7217	1084685	OLIGO	9.948333349	2.069629628	48	12	1	1225			1063	247	1	.05040143382	1	1	0	0	0	0	0	1	0	0	1	2186.756	1962.651	1	31.85856	22.38846
1226					NUT2	16	W	878072	878545	transcription from RNA polymerase II promoter	RNA polymerase II transcription mediator activity					YPR168W	YPR168W||ebi.ac.uk:Database:sgd;A_06_P7216||www.chem.agilent.com:Database:agp		A_06_P7216	1085868	OLIGO	10.160000016	2.069629628	49	12	1	1226			1084	246	1	.1630843785	1	1	0	0	0	0	0	0	0	0	1	168.7944	119.7242	1	7.130977	22.32721
1227					MET16	16	C	877628	876843	methionine metabolism*	phosphoadenylyl-sulfate reductase (thioredoxin) activity					YPR167C	YPR167C||ebi.ac.uk:Database:sgd;A_06_P7215||www.chem.agilent.com:Database:agp		A_06_P7215	1086635	OLIGO	10.371666683	2.069629628	50	12	1	1227			1105	247	1	.05042602381	1	1	0	0	0	0	0	0	0	0	1	2184.435	1947.602	1	33.826	22.30824
1228					MRP2	16	C	876625	876278	protein biosynthesis	structural constituent of ribosome					YPR166C	YPR166C||ebi.ac.uk:Database:sgd;A_06_P7214||www.chem.agilent.com:Database:agp		A_06_P7214	1082455	OLIGO	10.58333335	2.069629628	51	12	1	1228			1126	246	1	.06744468692	1	1	0	0	0	0	0	0	0	0	0	433.7476	540.6516	1	11.04398	22.73208
1229					RHO1	16	W	875364	875993	cell wall organization and biogenesis*	GTPase activity*					YPR165W	YPR165W||ebi.ac.uk:Database:sgd;A_06_P7213||www.chem.agilent.com:Database:agp		A_06_P7213	1084370	OLIGO	10.795000017	2.069629628	52	12	1	1229			1147	247	1	.04916465599	1	1	0	0	0	0	0	0	0	0	1	16265.85	15756.62	1	227.1632	22.64444
1230					MMS1	16	W	870699	874922	DNA repair*	molecular function unknown					YPR164W	YPR164W||ebi.ac.uk:Database:sgd;A_06_P7212||www.chem.agilent.com:Database:agp		A_06_P7212	1086074	OLIGO	11.006666684	2.069629628	53	12	1	1230			1168	246	1	.05704416195	1	1	0	0	0	0	0	0	0	0	1	724.5348	821.5883	1	16.56773	22.8015
1231					TIF3	16	C	869951	868641	translational initiation	translation initiation factor activity					YPR163C	YPR163C||ebi.ac.uk:Database:sgd;A_06_P7211||www.chem.agilent.com:Database:agp		A_06_P7211	1083216	OLIGO	11.218333351	2.069629628	54	12	1	1231			1190	247	1	.04950320737	1	1	0	0	0	0	0	0	0	0	1	20777.96	17244.12	1	237.6728	22.93431
1232					ORC4	16	C	868300	866711	DNA replication initiation*	DNA replication origin binding					YPR162C	YPR162C||ebi.ac.uk:Database:sgd;A_06_P7210||www.chem.agilent.com:Database:agp		A_06_P7210	1085073	OLIGO	11.430000018	2.069629628	55	12	1	1232			1211	246	1	.06417690776	1	1	0	0	0	0	0	0	0	0	1	551.1916	523.439	1	13.31883	22.76692
1233					SGV1	16	C	866418	864445	protein amino acid phosphorylation*	cyclin-dependent protein kinase activity					YPR161C	YPR161C||ebi.ac.uk:Database:sgd;A_06_P7209||www.chem.agilent.com:Database:agp		A_06_P7209	1085454	OLIGO	11.641666685	2.069629628	56	12	1	1233			1232	247	1	.05154965155	1	1	0	0	0	0	0	0	0	0	1	1392.459	1466.506	1	26.85	22.77289
1234					GPH1	16	W	861302	864010	glycogen catabolism	glycogen phosphorylase activity					YPR160W	YPR160W||ebi.ac.uk:Database:sgd;A_06_P7208||www.chem.agilent.com:Database:agp		A_06_P7208	1086125	OLIGO	11.853333352	2.069629628	57	12	1	1234			1253	246	1	.04963074397	1	1	0	0	0	0	0	0	0	0	1	8870.42	10931.68	1	85.30336	22.88971
1235					KRE6	16	W	857579	859741	cell wall organization and biogenesis*	glucosidase activity					YPR159W	YPR159W||ebi.ac.uk:Database:sgd;A_06_P7207||www.chem.agilent.com:Database:agp		A_06_P7207	1083974	OLIGO	12.065000019	2.069629628	58	12	1	1235			1274	247	1	.04956908926	1	1	0	0	0	0	0	0	0	0	1	4808.659	5625.136	1	68.62878	22.75362
1236						16	W	843258	844016	biological process unknown	molecular function unknown					YPR158W	YPR158W||ebi.ac.uk:Database:sgd;A_06_P7206||www.chem.agilent.com:Database:agp		A_06_P7206	1082879	OLIGO	12.276666686	2.069629628	59	12	1	1236			1296	246	1	.08535988112	1	1	0	0	0	0	0	0	0	0	1	338.4224	298.4275	1	10.86466	22.34375
1237						16	W	841262	842665	biological process unknown	molecular function unknown					YPR157W	YPR157W||ebi.ac.uk:Database:sgd;A_06_P7205||www.chem.agilent.com:Database:agp		A_06_P7205	1086308	OLIGO	12.488333353	2.069629628	60	12	1	1237			1317	247	1	.06989042694	1	1	0	0	0	0	0	0	0	0	0	340.1863	734.7005	1	7.757521	22.55118
1238					TPO3	16	C	839773	837905	polyamine transport	spermine transporter activity					YPR156C	YPR156C||ebi.ac.uk:Database:sgd;A_06_P7204||www.chem.agilent.com:Database:agp		A_06_P7204	1086816	OLIGO	12.70000002	2.069629628	61	12	1	1238			1337	246	1	.05152073434	1	1	0	0	0	0	0	0	0	0	0	2623.336	4072.351	1	37.69146	22.54545
1239					NCA2	16	C	837409	835559	aerobic respiration*	molecular function unknown					YPR155C	YPR155C||ebi.ac.uk:Database:sgd;A_06_P7203||www.chem.agilent.com:Database:agp		A_06_P7203	1083498	OLIGO	12.911666687	2.069629628	62	12	1	1239			1359	247	1	.05366156148	1	1	0	0	0	0	0	0	0	0	0	1138.229	975.5378	1	17.93375	22.71805
1240					PIN3	16	W	834561	835208	actin cytoskeleton organization and biogenesis	molecular function unknown					YPR154W	YPR154W||ebi.ac.uk:Database:sgd;A_06_P7202||www.chem.agilent.com:Database:agp		A_06_P7202	1086164	OLIGO	13.123333354	2.069629628	63	12	1	1240			1380	246	1	.05666232764	1	1	0	0	0	0	0	0	0	0	1	739.5055	855.2439	1	16.62457	22.85401
1241						16	W	833807	834241	biological process unknown	molecular function unknown					YPR153W	YPR153W||ebi.ac.uk:Database:sgd;A_06_P7201||www.chem.agilent.com:Database:agp		A_06_P7201	1083596	OLIGO	13.335000021	2.069629628	64	12	1	1241			1401	248	1	.3423577966	1	1	0	0	0	0	0	0	0	0	1	57.50354	74.04225	1	5.942296	22.91353
1242						16	C	833454	832057	biological process unknown	molecular function unknown					YPR152C	YPR152C||ebi.ac.uk:Database:sgd;A_06_P7200||www.chem.agilent.com:Database:agp		A_06_P7200	1080741	OLIGO	13.546666688	2.069629628	65	12	1	1242			1423	246	1	.07749651154	1	1	0	0	0	0	0	0	0	0	1	381.0675	359.0794	1	8.43434	22.52768
1243					SUE1	16	C	831671	831051	protein catabolism	molecular function unknown					YPR151C	YPR151C||ebi.ac.uk:Database:sgd;A_06_P7199||www.chem.agilent.com:Database:agp		A_06_P7199	1081013	OLIGO	13.758333355	2.069629628	66	12	1	1243			1444	247	1	.08996222559	1	1	0	0	0	0	0	0	0	0	1	327.89	264.8731	1	7.902371	22.40996
1244						16	W	830995	831516							YPR150W	YPR150W||ebi.ac.uk:Database:sgd;A_06_P7198||www.chem.agilent.com:Database:agp		A_06_P7198	1081527	OLIGO	13.970000022	2.069629628	67	12	1	1244			1465	246	1	.05397279077	1	1	0	0	0	0	0	0	0	0	0	933.979	1192.26	1	15.83201	22.61742
1245					NCE102	16	W	829914	830435	protein secretion	molecular function unknown					YPR149W	YPR149W||ebi.ac.uk:Database:sgd;A_06_P7197||www.chem.agilent.com:Database:agp		A_06_P7197	1083092	OLIGO	14.181666689	2.069629628	68	12	1	1245			1486	247	1	.05052364341	1	1	0	0	0	0	0	0	0	0	1	4213.677	5942.087	1	45.51123	22.22464
1246						16	C	828136	826829	biological process unknown	molecular function unknown					YPR148C	YPR148C||ebi.ac.uk:Database:sgd;A_06_P7196||www.chem.agilent.com:Database:agp		A_06_P7196	1082544	OLIGO	14.393333356	2.069629628	69	12	1	1246			1507	246	1	.04952814468	1	1	0	0	0	0	0	0	0	0	1	3699.216	3558.736	1	51.33485	22.58148
1247						16	C	826555	825641	biological process unknown	molecular function unknown					YPR147C	YPR147C||ebi.ac.uk:Database:sgd;A_06_P7195||www.chem.agilent.com:Database:agp		A_06_P7195	1081504	OLIGO	14.605000023	2.069629628	70	12	1	1247			1528	248	1	.05095429112	1	1	0	0	0	0	0	0	0	0	1	1716.372	1608.226	1	28.16657	22.70189
1248						16	C	825672	825343							YPR146C	YPR146C||ebi.ac.uk:Database:sgd;A_06_P7194||www.chem.agilent.com:Database:agp		A_06_P7194	1082709	OLIGO	14.81666669	2.069629628	71	12	1	1248			1550	246	1	.05015054365	1	1	0	0	0	0	0	0	0	0	1	2208.888	2436.407	1	31.56543	22.88679
1249					ASN1	16	W	822616	824334	asparagine biosynthesis	asparagine synthase (glutamine-hydrolyzing) activity					YPR145W	YPR145W||ebi.ac.uk:Database:sgd;A_06_P7193||www.chem.agilent.com:Database:agp		A_06_P7193	1084271	OLIGO	15.028333357	2.069629628	72	12	1	1249			1571	247	1	.04966586906	1	1	0	0	0	0	0	0	0	0	1	3042.003	3149.962	1	31.32891	22.73358
1250					NOC4	16	C	821419	819761	processing of 20S pre-rRNA*	snoRNA binding					YPR144C	YPR144C||ebi.ac.uk:Database:sgd;A_06_P7192||www.chem.agilent.com:Database:agp		A_06_P7192	1083935	OLIGO	15.240000024	2.069629628	73	12	1	1250			1592	246	1	.05809163428	1	1	0	0	0	0	0	0	0	0	0	638.3668	927.7084	1	13.35078	22.89377
1251					RRP15	16	W	818319	819071	processing of 27S pre-rRNA	molecular function unknown					YPR143W	YPR143W||ebi.ac.uk:Database:sgd;A_06_P7191||www.chem.agilent.com:Database:agp		A_06_P7191	1086248	OLIGO	15.451666691	2.069629628	74	12	1	1251			1613	247	1	.05318338627	1	1	0	0	0	0	0	0	0	0	0	1392.946	1049.666	1	21.48361	22.96715
1252						16	C	818689	818126							YPR142C	YPR142C||ebi.ac.uk:Database:sgd;A_06_P7190||www.chem.agilent.com:Database:agp		A_06_P7190	1085965	OLIGO	15.663333358	2.069629628	75	12	1	1252			1634	246	1	.1498408845	1	1	0	0	0	0	0	0	0	0	1	129.358	188.5784	1	4.777917	23.12941
1253					KAR3	16	C	817919	815730	meiosis*	microtubule motor activity*					YPR141C	YPR141C||ebi.ac.uk:Database:sgd;A_06_P7189||www.chem.agilent.com:Database:agp		A_06_P7189	1081848	OLIGO	15.875000025	2.069629628	76	12	1	1253			1655	247	1	.05845311895	1	1	0	0	0	0	0	0	0	0	0	913.446	622.0093	1	18.98588	22.58238
1254					TAZ1	16	W	814387	815532	phospholipid biosynthesis*	acyltransferase activity					YPR140W	YPR140W||ebi.ac.uk:Database:sgd;A_06_P7188||www.chem.agilent.com:Database:agp		A_06_P7188	1086482	OLIGO	16.086666692	2.069629628	77	12	1	1254			1677	247	1	.05499975181	1	1	0	0	0	0	0	0	0	0	1	865.9555	937.9095	1	16.35088	23.05948
1255					VPS66	16	C	814054	813152	protein-vacuolar targeting	molecular function unknown					YPR139C	YPR139C||ebi.ac.uk:Database:sgd;A_06_P7187||www.chem.agilent.com:Database:agp		A_06_P7187	1083487	OLIGO	16.298333359	2.069629628	78	12	1	1255			1698	247	1	.05969183406	1	1	0	0	0	0	0	0	0	0	1	673.0344	636.6681	1	14.93061	22.84502
1256					MEP3	16	C	812449	810980	ammonium transport	ammonium transporter activity					YPR138C	YPR138C||ebi.ac.uk:Database:sgd;A_06_P7186||www.chem.agilent.com:Database:agp		A_06_P7186	1086228	OLIGO	16.510000026	2.069629628	79	12	1	1256			1719	246	1	.05664536852	1	1	0	0	0	0	0	0	0	0	0	1705.514	860.6788	1	32.52974	22.29304
1257					RRP9	16	W	802355	804076	rRNA modification*	snoRNA binding					YPR137W	YPR137W||ebi.ac.uk:Database:sgd;A_06_P7185||www.chem.agilent.com:Database:agp		A_06_P7185	1083017	OLIGO	16.721666693	2.069629628	80	12	1	1257			1740	247	1	.05160836612	1	1	0	0	0	0	0	0	0	0	1	1459.174	1371.435	1	26.3063	22.54982
1258						16	C	802833	802321							YPR136C	YPR136C||ebi.ac.uk:Database:sgd;A_06_P7184||www.chem.agilent.com:Database:agp		A_06_P7184	1082182	OLIGO	16.93333336	2.069629628	81	12	1	1258			1761	247	1	.1004222617	1	1	0	0	0	0	0	0	0	0	1	231.9985	276.3764	1	8.263871	22.97865
1259					CTF4	16	W	799230	802013	DNA repair*	DNA binding					YPR135W	YPR135W||ebi.ac.uk:Database:sgd;A_06_P7183||www.chem.agilent.com:Database:agp		A_06_P7183	1083491	OLIGO	17.145000027	2.069629628	82	12	1	1259			1782	247	1	.05318706013	1	1	0	0	0	0	0	0	0	0	0	1342.692	1041.021	1	15.97577	22.96283
1260					MSS18	16	W	798047	798853	Group I intron splicing	molecular function unknown					YPR134W	YPR134W||ebi.ac.uk:Database:sgd;A_06_P7182||www.chem.agilent.com:Database:agp		A_06_P7182	1083342	OLIGO	17.356666694	2.069629628	83	12	1	1260			1803	246	1	.06228419689	1	1	0	0	0	0	0	0	0	0	1	555.6857	605.9557	1	11.28081	23.03019
1261					TOM5	16	W	797553	797705	mitochondrial matrix protein import	protein transporter activity					YPR133W-A	YPR133W-A||ebi.ac.uk:Database:sgd;A_06_P7181||www.chem.agilent.com:Database:agp		A_06_P7181	1080925	OLIGO	17.568333361	2.069629628	84	12	1	1261			1824	247	1	.05385463947	1	1	0	0	0	0	0	0	0	0	0	960.4884	1321.131	1	16.42174	22.62132
1262					IWS1	16	C	797206	795974	RNA elongation from RNA polymerase II promoter	RNA polymerase II transcription elongation factor activity					YPR133C	YPR133C||ebi.ac.uk:Database:sgd;A_06_P7180||www.chem.agilent.com:Database:agp		A_06_P7180	1086069	OLIGO	17.780000028	2.069629628	85	12	1	1262			1846	246	1	.05079160287	1	1	0	0	0	0	0	0	0	0	0	3198.899	2333.096	1	45.12352	22.56
1263					RPS23B	16	W	794961	795763	protein biosynthesis*	structural constituent of ribosome					YPR132W	YPR132W||ebi.ac.uk:Database:sgd;A_06_P7179||www.chem.agilent.com:Database:agp		A_06_P7179	1085964	OLIGO	17.991666695	2.069629628	86	12	1	1263			1867	248	1	.04913765677	1	1	0	0	0	0	0	0	0	0	1	57621.01	56969.71	1	594.8147	22.85091
[truncated: 9,531 more rows]
[truncated: 54 more columns]
